# Supplementary material for: Stimulus background influences phase invariant coding by correlated neural activity
Source: eLife. 2017 Mar 18;6:e24482. doi: 10.7554/eLife.24482 (PMC5389862; doi:10.7554/eLife.24482)
Supplement: Figure 1—source data 1. — DOI: http://dx.doi.org/10.7554/eLife.24482.003 [file elife-24482-fig1-data1.xlsx]

## Sheet: Figure1F
		Beat frequency	mean Detectability	SE
		1	0.686662	0.0673595
		2	0.699819	0.0611069
		4	0.692744	0.0581781
		8	0.678544	0.0610579
		16	0.647144	0.053789
		32	0.582262	0.0534128
		64	0.42998	0.0616634
		128	0.231824	0.0640977

## Sheet: Figure1E
		Beat frequency	mean Distance	SE
		1	0.714558	0.0581227
		2	0.720291	0.0572282
		4	0.719874	0.0549251
		8	0.718188	0.051308
		16	0.715168	0.0466196
		32	0.715982	0.0451237
		64	0.705813	0.041536
		128	0.692678	0.0391605
