# Supplementary material for: Stimulus background influences phase invariant coding by correlated neural activity
Source: eLife. 2017 Mar 18;6:e24482. doi: 10.7554/eLife.24482 (PMC5389862; doi:10.7554/eLife.24482)
Supplement: Figure 2—figure supplement 1—source data 1. — DOI: http://dx.doi.org/10.7554/eLife.24482.007 [file elife-24482-fig2-figsupp1-data1.xlsx]

## Sheet: Figure2_supplement_Fig1_A_2Hz
		chirp phase 1
		Stimulus	Neuron 1																				Neuron 2
			Trial 1	Trial 2	Trial 3	Trial 4	Trial 5	Trial 6	Trial 7	Trial 8	Trial 9	Trial 10	Trial 11	Trial 12	Trial 13	Trial 14	Trial 15	Trial 16	Trial 17	Trial 18	Trial 19		Trial 1	Trial 2	Trial 3	Trial 4	Trial 5	Trial 6	Trial 7	Trial 8	Trial 9	Trial 10	Trial 11	Trial 12	Trial 13	Trial 14	Trial 15	Trial 16	Trial 17	Trial 18	Trial 19
		-0.00745358	0	1	0	1	0	0	1	0	0	1	1	1	0	0	0	0	0	0	0		1	1	1	0	1	1	1	1	1	0	0	1	0	1	1	0	0	1	0
		0.00496908	1	0	1	1	1	1	0	0	1	0	0	0	1	1	1	0	0	1	1		0	0	1	0	1	1	0	0	0	1	0	0	0	0	0	0	1	1	0
		0.017391	0	1	1	1	1	0	1	0	1	0	1	0	1	0	0	1	1	1	1		0	0	1	1	1	0	1	0	0	1	1	1	1	1	0	0	0	0	1
		0.0298101	1	0	0	0	1	0	0	1	0	1	0	1	0	0	1	1	1	1	1		0	0	0	1	0	0	1	1	1	1	1	0	0	0	0	1	0	1	0
		0.0422245	0	0	1	0	1	0	1	1	1	1	0	0	1	1	1	0	0	1	0		1	1	0	0	1	1	1	1	0	0	0	0	1	1	1	1	0	1	1
		0.0546323	1	1	0	0	0	0	0	1	0	1	1	1	0	0	0	1	0	0	1		1	0	1	0	0	1	0	0	0	0	0	0	1	1	1	1	1	0	1
		0.0670314	0	1	1	1	1	1	0	0	0	0	1	1	1	1	0	0	0	1	0		1	1	1	1	0	1	0	0	1	1	1	1	1	0	1	0	1	0	1
		0.0794199	1	0	0	1	1	1	0	0	1	0	1	1	1	1	1	0	1	0	0		1	0	1	1	1	0	0	1	1	1	1	1	1	1	1	1	1	1	1
		0.0917959	1	1	0	0	0	1	1	1	1	1	0	0	1	0	0	1	1	1	1		0	0	0	1	0	0	1	0	1	1	0	1	0	0	0	1	1	1	0
		0.104157	0	1	1	1	0	0	1	1	0	1	0	0	0	1	1	1	0	0	0		0	1	0	0	1	0	1	0	1	0	0	0	0	1	1	0	0	1	0
		0.116502	1	0	1	0	0	0	1	0	0	0	1	0	1	0	1	0	1	0	1		0	1	0	0	1	1	0	1	0	0	1	1	1	0	0	0	1	0	0
		0.128829	0	0	0	0	1	0	0	0	1	1	1	1	0	0	0	1	0	1	1		1	1	1	0	1	1	0	0	0	1	1	1	1	0	0	1	1	0	1
		0.141135	1	0	1	0	1	0	0	1	1	0	0	1	0	1	1	0	1	1	0		1	0	1	1	0	0	1	1	0	1	1	0	0	0	0	0	0	1	0
		0.153419	0	1	0	1	1	1	0	0	1	1	1	1	0	0	1	1	1	0	0		0	0	0	1	1	1	1	1	1	1	0	0	1	1	1	0	0	1	1
		0.165679	0	1	1	1	0	1	1	1	0	0	0	0	1	1	0	1	1	0	0		1	0	1	0	0	0	1	0	0	0	1	0	0	1	1	1	1	0	1
		0.177913	1	1	0	1	0	1	1	1	0	0	1	1	1	1	1	0	0	0	0		0	1	1	0	0	0	0	1	1	1	0	1	0	0	1	0	0	0	1
		0.190118	1	0	1	0	1	0	1	0	0	0	0	0	1	0	0	1	1	1	1		1	1	1	0	1	1	1	0	1	1	0	1	1	1	1	1	1	0	0
		0.202294	0	0	0	0	0	1	0	1	1	1	0	1	0	0	0	0	0	1	1		0	0	0	1	0	0	0	1	0	0	1	1	0	0	0	1	1	1	0
		0.214438	1	1	1	0	1	1	1	1	1	1	1	1	0	1	1	1	0	1	1		1	1	0	1	1	1	1	1	1	0	0	0	1	1	0	1	0	1	0
		0.226547	0	1	1	1	1	0	0	0	0	0	0	0	1	0	0	1	0	0	0		0	1	0	0	1	1	0	1	0	0	1	1	1	1	1	0	0	1	0
		0.238621	1	0	0	1	0	0	1	0	0	1	1	1	1	1	1	0	1	1	1		0	0	1	1	1	1	0	0	1	0	0	1	0	0	1	0	1	0	1
		0.250657	0	1	1	0	1	1	0	0	1	1	1	0	0	1	0	0	0	0	1		1	1	1	1	0	0	1	0	1	1	1	0	0	0	0	1	1	0	1
		0.262654	1	0	0	1	0	1	1	0	1	0	0	0	1	0	1	1	1	0	0		0	0	0	1	0	0	1	0	0	0	1	0	0	0	0	1	0	1	0
		0.274609	0	1	1	0	0	0	0	1	0	1	0	1	0	0	1	0	1	1	0		1	1	1	0	1	1	1	1	0	1	0	0	1	1	0	1	1	1	1
		0.286521	0	0	0	1	0	1	0	1	0	1	1	0	0	1	0	1	0	0	1		1	1	1	1	1	1	0	0	1	1	1	1	1	1	1	0	0	0	1
		0.298388	1	1	1	1	1	0	1	1	1	0	0	1	1	1	0	1	0	1	0		1	1	0	0	0	0	1	1	1	1	1	1	1	1	1	1	1	1	1
		0.310207	0	1	0	1	0	1	1	0	1	0	0	1	1	1	0	0	1	1	0		1	0	1	1	0	1	0	1	1	1	1	1	0	0	0	1	1	0	0
		0.321978	1	0	0	0	0	0	0	1	1	1	1	0	0	0	1	0	1	0	1		0	0	0	0	1	0	1	0	0	0	0	0	1	0	1	0	0	1	0
		0.333697	1	0	1	0	1	1	1	1	0	0	1	1	1	0	1	1	1	1	1		1	0	1	1	1	1	0	0	0	1	0	0	1	1	0	0	1	1	1
		0.345364	0	0	1	0	1	0	1	0	0	1	0	0	0	1	1	1	1	0	0		0	1	1	0	1	1	1	0	1	0	1	0	1	1	1	1	0	0	1
		0.356977	1	1	0	0	0	1	0	0	0	1	1	1	0	0	1	0	0	1	1		0	1	1	1	1	0	0	1	1	1	0	1	0	1	1	1	1	0	0
		0.368533	0	1	1	1	1	0	0	0	1	0	1	1	1	1	0	0	0	1	0		0	0	0	1	0	1	1	1	1	0	0	1	0	0	0	0	1	0	1
		0.380031	1	0	0	0	1	0	1	1	1	0	0	0	1	1	0	1	1	0	1		1	1	0	0	0	1	0	1	1	1	1	1	0	0	1	0	0	1	1
		0.391468	1	1	1	1	1	1	0	1	1	1	0	0	0	0	0	1	0	0	0		1	1	1	0	1	0	0	1	0	0	1	0	1	0	1	0	0	1	0
		0.402844	0	1	1	1	0	1	1	1	0	1	0	1	1	1	1	0	1	0	1		1	1	1	1	0	0	1	0	0	0	0	1	1	1	0	1	1	0	0
		0.414157	0	1	0	1	1	0	1	0	1	0	1	1	1	0	1	1	0	1	0		0	0	0	1	0	0	1	1	0	1	0	1	0	0	0	1	1	1	0
		0.425404	0	0	0	1	0	1	0	0	0	0	1	1	0	1	0	0	1	1	1		1	0	0	1	1	1	0	0	1	0	1	1	1	1	1	1	0	1	1
		0.436584	0	0	0	0	0	1	0	1	0	1	1	0	0	1	1	0	0	1	1		1	1	1	0	0	1	0	1	0	1	1	0	1	1	1	1	1	1	1
		0.447695	1	1	1	0	1	1	1	1	1	0	0	0	0	0	0	1	1	1	0		1	1	1	0	1	1	1	0	1	1	0	0	0	1	0	0	1	0	1
		0.458735	1	1	1	0	0	0	1	1	0	1	1	0	1	0	1	1	1	0	1		0	0	0	1	1	0	1	1	1	1	1	1	0	0	0	1	1	0	1
		0.469703	1	1	1	1	1	0	1	0	1	0	0	1	1	1	1	1	0	1	1		0	1	0	0	0	1	1	1	0	0	0	1	0	1	1	1	0	1	0
		0.480596	0	0	0	1	1	1	0	1	1	1	1	0	1	1	0	0	0	0	0		1	0	1	0	1	0	1	1	1	1	1	0	1	1	0	0	0	1	1
		0.491414	1	0	0	0	1	1	0	0	1	1	0	0	0	0	0	1	1	1	0		1	0	1	1	1	1	0	0	0	0	1	1	1	0	1	0	1	0	1
		0.502154	1	0	1	1	0	0	1	1	1	0	1	0	0	0	1	1	1	1	0		1	1	1	1	1	0	1	0	1	1	1	0	1	0	1	0	0	1	0
		0.512815	1	1	0	1	0	0	1	1	0	0	0	1	1	0	1	1	0	0	1		0	0	0	1	0	1	0	0	1	1	0	1	1	0	0	1	1	0	0
		0.523395	0	1	0	0	0	0	0	0	0	0	0	1	1	1	0	0	1	1	0		1	1	0	0	0	0	1	1	1	0	0	0	0	1	0	1	0	0	1
		0.533892	0	0	1	1	1	1	0	0	0	1	1	1	1	1	1	0	0	0	1		0	1	0	0	1	1	0	1	0	1	1	1	1	1	1	0	1	1	1
		0.544305	1	1	0	0	1	1	1	1	1	1	1	1	1	1	0	0	1	1	1		0	1	0	1	1	0	1	0	0	0	1	1	1	0	1	1	1	0	0
		0.554631	0	0	1	1	1	1	1	1	0	0	0	0	0	0	1	1	1	0	1		1	0	1	1	1	0	1	1	1	1	0	0	0	1	0	0	0	1	0
		0.564871	1	1	1	1	0	1	1	0	0	1	1	1	1	0	1	1	0	1	0		0	0	1	1	0	1	0	1	1	1	1	1	0	0	1	0	1	1	1
		0.575021	1	1	1	1	1	0	0	0	1	0	1	0	0	1	0	0	0	0	1		1	1	0	0	0	1	1	1	0	0	0	0	0	1	1	1	0	1	1
		0.58508	0	0	1	0	0	0	0	1	1	0	0	1	1	1	0	0	0	1	1		1	1	1	1	0	1	0	0	0	1	1	1	1	0	1	0	0	1	0
		0.595047	1	1	0	1	0	1	1	1	1	1	1	1	0	0	1	1	1	0	0		1	0	1	1	1	1	1	0	1	0	1	0	1	1	1	1	1	0	1
		0.60492	1	0	1	0	1	1	0	1	0	1	0	0	1	1	1	1	1	0	0		0	1	1	0	0	0	0	0	1	1	1	1	0	0	0	1	1	0	0
		0.614698	0	1	0	0	0	0	1	0	1	1	1	0	0	0	0	1	1	1	1		1	0	0	0	1	1	1	1	1	0	0	1	0	1	0	1	0	1	0
		0.624378	0	1	0	1	1	0	0	0	0	0	1	1	0	1	0	0	0	1	1		0	1	0	0	1	1	0	1	0	1	1	0	1	1	1	1	1	1	1
		0.63396	0	0	0	0	1	1	1	1	1	1	1	1	1	0	0	0	1	1	1		1	0	1	1	1	0	0	0	1	0	1	1	1	1	0	0	1	0	1
		0.643441	1	0	1	1	1	1	0	1	1	1	0	0	0	1	1	1	1	0	0		1	1	1	1	1	0	1	1	1	1	0	1	1	0	1	1	0	1	1
		0.652821	1	1	1	0	1	0	0	0	0	0	0	0	1	0	1	1	1	1	0		0	0	0	1	0	1	1	1	0	1	0	0	0	0	0	0	1	1	0
		0.662098	1	0	1	1	0	0	1	1	0	0	1	1	1	1	1	1	0	0	0		0	1	1	1	0	0	1	1	0	0	0	0	1	1	1	1	0	0	1
		0.671271	1	1	1	1	0	0	1	0	1	0	1	1	1	1	0	0	0	1	1		0	1	0	0	0	0	0	0	1	1	1	0	1	1	1	0	1	0	1
		0.680337	0	1	1	0	1	1	0	0	1	0	1	1	0	1	1	0	0	1	1		1	1	1	1	1	1	0	0	1	1	0	1	0	1	1	1	0	0	0
		0.689296	0	0	0	0	1	1	1	0	1	1	0	0	1	0	0	1	0	0	1		0	0	1	1	1	0	1	1	0	1	1	1	0	0	0	1	1	1	0
		0.698146	1	0	1	0	0	0	1	1	0	1	0	0	0	0	1	1	1	0	0		1	1	0	0	0	1	1	1	0	0	0	1	1	1	0	0	0	1	1
		0.706886	1	1	0	1	0	1	1	1	0	1	1	0	1	1	1	1	0	1	1		1	1	1	0	1	1	1	0	0	0	1	0	1	1	0	0	1	1	0
		0.715514	1	1	0	1	1	0	0	0	1	0	1	1	1	1	0	0	1	0	0		1	1	1	1	1	1	0	0	1	1	1	1	1	1	1	1	0	0	1
		0.72403	0	0	0	0	1	1	0	1	1	1	0	1	1	0	1	0	1	1	1		1	0	1	1	1	0	0	1	1	1	1	0	1	0	1	0	1	1	0
		0.732431	0	1	1	1	1	1	1	1	1	1	1	1	0	0	0	1	1	1	0		0	0	0	0	0	1	0	1	1	1	0	1	0	0	0	1	1	0	1
		0.740716	1	0	1	1	0	1	1	0	0	0	0	0	0	1	1	1	1	0	1		1	0	1	0	1	0	1	1	1	0	0	0	1	0	1	1	0	1	0
		0.748884	1	1	1	1	0	0	1	1	1	1	1	1	0	1	1	0	0	0	1		1	1	0	0	1	1	0	0	0	0	1	1	0	1	1	1	1	1	0
		0.756934	0	0	0	0	0	0	0	0	0	0	1	1	1	0	0	1	1	1	0		0	1	0	1	0	1	1	0	1	1	1	1	1	1	1	0	1	0	1
		0.764865	0	0	0	0	1	1	0	1	0	1	1	0	1	0	1	0	0	1	1		0	0	1	1	1	0	1	1	0	0	0	1	0	0	0	1	1	1	0
		0.772675	0	1	0	0	1	0	0	1	0	1	0	1	0	0	0	0	0	1	1		1	1	0	1	0	1	1	1	1	0	0	0	1	1	0	1	0	1	1
		0.780362	1	0	1	1	1	1	1	1	1	1	0	0	0	0	0	1	1	0	0		0	1	1	0	1	1	1	0	1	1	1	0	1	1	0	0	0	0	0
		0.787927	1	1	1	1	0	0	1	0	1	0	1	1	0	1	1	1	0	0	0		1	1	1	1	1	0	0	0	0	1	1	0	0	0	1	0	0	0	1
		0.795367	0	1	1	1	1	1	1	0	1	1	0	0	1	1	0	0	1	1	1		1	0	1	1	0	1	1	1	1	1	1	1	0	1	1	0	1	1	1
		0.802681	1	0	0	0	1	0	0	1	1	0	1	1	1	1	1	1	1	1	1		0	0	1	0	0	0	0	1	1	1	0	1	0	0	0	1	1	1	1
		0.809869	1	1	1	1	1	1	1	1	0	0	0	0	0	1	1	0	1	0	0		1	1	0	1	1	1	1	1	1	0	0	1	1	1	1	1	0	1	0
		0.816929	0	1	1	1	0	1	1	0	0	1	0	1	1	0	1	1	0	0	0		0	1	1	0	1	1	0	1	0	1	1	0	1	1	1	0	1	1	1
		0.82386	0	1	1	1	0	0	1	0	1	0	1	1	1	1	1	1	1	1	0		0	0	0	1	1	1	0	0	0	0	1	1	1	1	0	1	1	0	1
		0.830661	0	1	0	0	0	1	0	1	0	1	1	0	1	1	0	0	0	1	1		1	1	1	1	1	0	1	1	1	1	1	1	1	0	0	1	0	1	0
		0.83733	1	0	0	0	1	1	0	1	1	1	0	0	0	1	0	1	0	1	1		0	0	0	0	0	0	1	1	0	0	0	1	0	0	1	1	0	0	0
		0.843867	1	0	0	0	1	0	1	0	0	0	0	0	0	0	1	0	1	1	0		1	1	1	0	1	1	1	0	0	1	1	0	0	0	0	1	1	1	1
		0.850272	1	1	1	1	0	1	0	1	0	1	0	1	1	0	1	1	1	0	1		1	1	0	1	1	1	0	0	1	0	0	0	1	1	1	0	1	0	1
		0.856541	1	1	1	1	1	0	1	0	1	1	1	1	1	1	0	1	0	1	0		1	1	1	1	0	1	1	0	0	1	1	1	1	1	1	0	1	1	1
		0.862676	0	0	1	0	1	1	0	1	1	0	1	1	1	1	1	0	1	0	0		0	0	0	1	0	0	1	1	1	1	1	1	0	1	1	1	1	0	0
		0.868674	1	0	0	0	0	0	1	1	1	1	1	1	0	0	0	1	1	0	1		0	0	1	0	0	0	0	1	1	0	0	0	1	0	0	1	0	1	1
		0.874535	1	0	1	1	1	1	0	1	0	1	0	0	0	0	0	1	0	0	0		1	1	1	1	1	1	0	0	0	1	1	1	1	1	1	1	1	1	0
		0.880259	0	1	0	1	0	1	1	0	0	0	1	0	1	1	1	0	1	1	1		1	1	0	0	1	0	0	0	1	1	1	1	0	1	0	0	0	0	1
		0.885843	1	1	1	1	1	0	1	0	1	0	1	0	1	1	0	1	0	1	1		0	0	1	0	1	0	1	1	1	0	0	0	1	0	0	1	1	1	0
		0.891287	0	1	0	0	0	0	0	1	0	0	0	1	1	1	1	0	1	1	1		1	0	0	1	0	1	1	1	1	1	0	0	0	0	1	0	0	1	1
		0.89659	0	0	0	0	0	1	1	0	1	0	1	1	0	0	0	0	0	0	0		1	0	1	0	1	1	1	1	1	0	1	0	1	1	1	0	1	0	1
		0.901752	1	0	1	1	1	1	1	0	0	1	0	0	0	0	1	1	1	1	0		0	1	1	1	1	1	0	1	0	1	1	1	1	1	1	0	0	0	0
		0.906772	0	1	1	1	0	0	0	1	1	1	1	1	0	1	1	1	0	0	1		0	1	1	1	1	1	1	0	0	1	1	1	0	1	1	1	1	1	1
		0.911648	1	1	0	1	1	1	1	0	1	1	1	1	1	1	1	0	0	1	0		0	0	1	1	0	0	1	0	0	0	0	1	0	0	0	1	0	1	0
		0.91638	0	0	1	0	1	0	0	1	1	0	0	0	1	0	0	1	1	1	1		1	1	0	1	0	0	1	1	1	0	0	0	1	1	1	1	0	1	1
		0.920968	1	0	0	0	1	1	1	1	0	1	1	1	0	1	1	0	1	1	1		1	1	0	0	0	1	0	1	0	1	1	1	1	1	0	0	1	0	1
		0.92541	1	1	1	1	1	1	1	1	0	1	0	0	1	0	0	1	1	0	0		1	1	1	1	1	1	0	0	1	1	1	1	1	1	1	0	1	0	0
		0.929706	1	1	1	1	0	0	0	0	0	0	1	0	0	1	1	0	0	0	0		0	1	1	0	1	1	1	1	1	1	0	1	0	0	0	1	1	1	0
		0.933855	0	1	1	1	0	0	0	0	0	0	1	1	1	0	0	1	1	0	0		1	0	0	0	0	0	1	0	1	1	1	0	1	0	1	1	0	1	1
		0.937857	0	0	0	0	1	1	1	1	1	1	1	1	1	1	0	0	0	0	1		1	1	0	1	1	1	0	1	1	0	0	1	0	1	1	1	1	1	1
		0.941711	1	1	0	0	1	1	0	1	1	1	0	0	0	0	0	1	1	1	1		1	0	1	0	1	1	0	0	0	0	1	0	0	1	0	0	1	0	1
		0.945416	1	0	0	1	0	0	0	1	0	1	0	1	0	1	1	1	1	1	0		1	1	1	1	0	1	1	1	0	1	1	1	1	0	1	1	0	1	0
		0.948971	0	1	1	0	0	0	0	0	1	0	0	0	0	1	1	1	0	0	1		0	1	1	1	0	0	0	1	0	1	1	1	0	1	0	1	1	1	0
		0.952377	0	1	1	0	0	1	0	0	1	0	1	1	1	0	0	0	1	1	1		0	0	0	1	1	0	1	0	1	0	0	1	1	0	0	0	0	1	1
		0.955632	1	0	0	1	1	1	1	1	1	1	1	1	1	0	1	0	0	1	1		1	1	0	0	1	0	1	1	0	1	1	0	1	1	1	1	0	0	1
		0.958737	0	1	1	0	1	0	1	1	0	1	0	1	1	0	1	1	0	1	0		1	1	0	1	0	1	0	0	1	1	1	1	1	1	1	0	1	0	1
		0.96169	1	0	1	1	1	1	0	0	0	0	1	0	0	1	0	0	1	0	0		0	0	1	1	1	0	1	1	1	0	0	0	0	0	0	1	1	1	1
		0.964491	1	1	1	1	0	0	1	0	1	1	0	0	1	1	1	1	0	1	1		0	0	0	0	0	1	1	1	1	0	1	1	0	1	1	1	1	1	0
		0.96714	1	0	0	0	0	1	1	1	0	0	1	1	1	1	0	0	1	0	1		1	1	1	0	1	1	1	1	1	0	0	0	1	0	1	1	0	0	0
		0.969636	0	0	0	1	1	1	0	1	1	1	1	1	0	1	0	1	1	1	0		1	1	1	0	1	1	0	0	0	1	1	1	1	1	1	0	1	0	1
		0.97198	1	1	0	0	1	0	1	0	0	0	1	0	1	0	1	1	1	0	1		1	0	1	1	1	0	1	1	0	1	1	1	1	0	0	1	1	0	1
		0.974169	0	1	1	1	0	0	1	1	1	0	0	1	0	1	1	0	0	0	0		0	0	1	1	0	0	0	0	1	1	0	0	0	0	0	0	0	1	0
		0.976205	1	1	1	1	1	0	1	0	0	1	1	0	1	0	1	1	0	1	1		0	1	0	1	1	1	0	1	1	0	0	0	1	0	1	0	0	1	1
		0.978087	0	0	1	0	0	1	0	1	1	0	0	0	1	0	0	0	0	0	0		1	1	1	0	1	1	1	1	0	1	1	0	0	1	1	1	1	0	0
		0.979814	1	0	0	1	0	1	1	0	1	1	1	1	1	1	1	0	1	1	1		1	1	1	1	1	0	0	0	0	1	1	1	1	1	0	0	1	1	1
		0.981386	0	0	1	0	1	1	1	1	1	1	0	0	0	0	0	1	1	1	1		0	1	0	1	0	1	1	0	1	1	0	1	0	0	0	1	1	0	0
		0.982804	0	1	0	1	1	1	0	1	0	1	1	1	0	1	1	1	0	0	0		0	0	0	0	0	0	1	1	1	0	0	1	1	1	0	1	0	1	1
		0.984066	1	1	1	0	0	0	1	0	1	0	1	1	1	1	0	1	0	1	1		1	1	1	0	1	1	1	1	1	1	0	0	1	1	1	1	0	1	1
		0.985173	0	1	1	1	1	1	0	1	1	0	0	0	1	1	0	0	1	0	0		1	0	1	1	1	1	1	1	0	0	1	1	0	1	1	0	1	1	0
		0.986124	1	0	0	0	1	0	0	0	0	1	0	1	0	0	1	1	1	1	1		1	0	1	1	0	1	0	0	1	0	1	1	1	1	1	1	1	0	1
		0.98692	0	1	1	1	1	0	1	1	1	1	1	0	1	1	1	0	0	1	1		0	0	0	0	0	0	1	1	0	1	1	1	1	0	0	1	0	1	0
		0.98756	1	0	1	1	0	1	1	0	0	1	0	1	0	0	1	1	1	0	0		0	1	0	1	1	1	0	0	0	0	0	0	0	1	1	0	0	0	1
		0.988043	1	1	0	0	1	0	0	0	1	0	1	1	0	1	1	0	0	1	1		1	1	1	0	1	1	1	1	1	1	1	1	1	0	1	1	0	1	1
		0.988371	0	1	0	1	0	1	1	1	1	0	1	0	0	0	0	1	1	1	0		1	1	1	1	1	0	0	0	0	1	0	1	1	1	0	0	1	0	1
		0.988543	1	0	0	0	1	1	0	1	1	0	1	0	1	1	1	0	1	0	0		1	1	1	1	0	0	1	1	1	1	1	0	0	0	1	1	1	1	1
		0.988559	1	1	1	0	1	1	0	1	0	1	0	0	0	0	0	1	1	0	1		0	0	1	1	0	0	1	1	1	1	1	1	0	0	0	1	1	1	0
		0.988418	1	0	1	1	1	0	1	1	0	1	0	1	1	1	0	1	0	0	0		1	1	0	0	1	1	0	0	1	0	0	0	1	1	1	1	0	1	0
		0.988121	0	1	1	1	0	0	1	0	0	1	0	1	1	0	1	0	0	1	1		1	1	0	0	1	1	0	1	0	0	1	0	1	1	1	0	1	1	1
		0.987669	0	0	1	1	0	0	0	0	0	0	1	1	1	1	0	1	1	1	1		0	1	1	1	1	1	1	0	1	1	0	1	0	1	1	0	1	0	1
		0.98706	0	0	0	0	0	1	1	0	1	1	1	1	0	1	1	0	1	1	0		0	0	1	1	1	0	1	1	0	1	1	1	1	0	0	1	1	1	0
		0.986296	1	1	1	0	1	1	1	1	0	1	0	0	0	0	1	0	1	0	0		1	0	0	1	0	1	0	1	0	1	0	0	0	1	1	0	0	1	0
		0.985376	1	1	0	1	0	1	0	1	1	1	1	1	1	1	1	1	0	0	1		1	1	1	0	0	1	1	1	0	0	1	1	1	1	1	1	1	0	1
		0.9843	1	1	0	1	1	0	1	0	1	0	1	0	1	0	0	0	0	1	1		1	1	1	0	1	0	0	0	1	1	0	1	1	0	1	0	0	0	1
		0.983069	0	0	1	0	0	1	0	1	1	0	0	1	1	1	1	0	0	1	1		1	0	1	1	1	0	1	0	1	0	1	0	1	0	0	1	1	0	1
		0.981682	0	0	0	0	0	1	1	0	1	0	1	1	0	1	0	0	1	1	0		0	0	0	1	0	0	0	0	1	0	1	0	0	1	0	1	1	0	0
		0.980141	1	0	1	1	1	0	0	1	0	0	0	0	0	0	1	1	1	0	0		0	1	0	0	0	1	1	1	1	0	1	0	1	1	1	1	0	1	0
		0.978444	1	1	1	0	0	0	1	1	0	0	1	0	0	0	1	1	0	0	0		0	0	0	1	1	1	0	1	0	1	0	1	0	0	0	0	1	1	1
		0.976594	1	1	0	1	1	0	1	0	1	0	0	1	1	1	0	1	0	0	1		1	1	1	1	1	1	1	0	1	1	1	1	0	1	1	0	1	1	1
		0.974589	0	1	1	1	1	1	0	1	1	1	0	1	1	1	0	0	1	1	1		0	1	1	0	1	1	1	1	1	1	1	1	1	0	0	1	0	0	0
		0.97243	0	0	0	0	1	0	1	0	0	1	0	0	0	0	1	1	1	1	1		1	0	0	1	0	0	0	1	1	1	0	0	0	1	1	1	0	1	1
		0.970117	1	0	1	1	1	0	0	0	1	1	1	0	1	0	1	1	1	0	0		1	1	1	0	1	1	1	1	0	0	0	1	1	1	1	1	0	1	0
		0.967652	1	1	1	1	0	0	1	0	0	1	0	1	0	0	0	0	0	1	1		1	1	0	1	1	1	0	0	0	1	1	0	1	0	0	0	1	0	1
		0.965033	0	0	1	0	1	0	0	1	1	0	1	1	1	1	0	1	0	1	0		1	1	1	0	0	0	1	1	0	1	0	1	1	0	1	0	1	1	1
		0.962262	0	0	0	0	0	1	0	1	0	1	1	1	1	1	0	0	1	0	1		0	0	0	1	0	0	1	1	1	0	0	1	0	1	0	1	1	1	0
		0.95934	1	1	0	0	0	1	1	0	0	1	1	0	0	1	1	1	1	0	1		0	0	1	0	0	0	1	0	1	0	0	0	1	1	1	1	0	0	1
		0.956265	1	1	0	1	1	1	1	1	0	0	0	0	0	0	1	0	1	0	0		0	0	1	0	1	1	0	1	0	1	1	1	1	1	1	0	1	1	0
		0.95304	1	0	1	1	0	0	1	1	1	1	1	0	1	1	1	1	0	1	0		1	1	0	0	1	1	1	0	1	1	1	1	0	0	0	0	1	0	1
		0.949664	0	1	1	1	1	1	0	0	1	0	1	1	1	1	0	0	0	0	1		0	0	1	1	1	1	0	1	1	1	1	1	1	0	0	1	0	1	0
		0.946139	0	1	0	0	0	0	1	1	1	0	0	1	0	1	1	1	0	1	1		1	1	0	1	0	0	0	1	1	1	1	0	0	1	1	1	0	0	1
		0.942463	1	0	1	1	1	1	0	0	0	1	0	1	0	0	0	0	1	1	0		1	0	1	0	1	1	1	1	0	0	0	0	1	1	1	0	0	1	0
		0.938639	0	1	0	0	1	1	0	1	1	1	0	0	0	0	1	1	1	0	1		1	1	1	1	1	1	0	0	1	0	0	1	0	1	1	0	1	0	1
		0.934667	1	0	1	1	0	0	1	0	1	1	1	1	1	0	1	0	0	1	1		1	1	1	1	0	0	1	1	0	0	1	1	0	0	1	0	1	1	1
		0.930548	0	1	1	0	0	1	0	0	0	0	1	0	1	1	0	0	1	1	0		0	0	0	0	0	0	1	0	0	0	1	1	1	1	0	1	1	1	0
		0.926281	1	0	0	0	1	0	1	1	1	0	0	1	1	1	0	1	0	0	0		0	1	0	1	1	1	0	0	1	0	0	0	0	0	0	1	0	0	1
		0.921868	0	1	0	0	1	0	0	0	0	0	1	0	0	0	1	1	1	1	1		1	1	1	0	1	1	1	1	0	1	1	1	1	1	0	1	1	1	0
		0.917309	1	1	1	1	0	1	1	1	0	1	0	0	0	0	1	0	1	0	0		1	0	1	1	0	1	0	0	1	1	1	0	1	1	1	0	1	0	1
		0.912606	1	0	1	1	0	0	1	0	1	1	1	0	1	1	0	1	0	0	1		0	1	0	1	0	0	1	1	1	1	0	1	1	0	0	1	0	1	0
		0.907758	0	0	0	1	1	1	0	1	1	0	0	1	1	1	0	0	1	1	1		0	0	1	1	0	1	1	1	1	1	1	0	0	0	1	0	1	1	1
		0.902767	0	0	0	0	1	1	0	1	0	1	1	1	1	0	1	1	0	1	1		1	1	0	0	1	0	1	0	0	0	0	1	1	0	1	1	0	1	1
		0.897634	0	1	1	1	1	1	1	1	0	1	0	0	0	0	1	0	1	0	0		1	1	1	1	1	1	0	0	1	1	1	1	1	1	1	0	1	0	1
		0.892359	1	0	1	1	0	0	1	0	1	1	1	1	1	1	1	1	0	1	0		1	0	1	0	1	0	1	0	0	1	1	0	1	1	1	1	1	0	0
		0.886943	1	1	0	0	0	0	0	0	1	0	0	1	0	1	0	1	1	0	0		0	0	0	1	1	0	0	1	0	1	1	1	0	0	0	1	1	1	0
		0.881387	0	0	1	1	0	0	0	0	0	0	0	0	0	1	0	0	0	0	1		1	0	1	1	0	1	1	1	1	0	0	0	1	1	0	1	0	1	0
		0.875691	1	0	1	0	0	0	1	1	0	0	1	0	0	0	0	0	0	0	1		0	1	1	0	1	1	1	1	0	0	1	1	0	1	1	0	0	1	1
		0.869858	0	1	0	0	1	1	0	0	0	1	0	0	1	0	0	1	0	0	0		0	1	1	0	1	0	0	0	1	1	0	1	0	1	1	0	0	0	1
		0.863887	0	1	1	1	1	1	1	1	1	1	1	1	1	0	1	1	0	1	1		1	1	0	1	1	0	1	1	1	1	1	0	1	0	0	0	1	0	0
		0.857779	1	1	1	0	0	0	1	0	1	0	1	1	1	1	1	0	1	1	0		0	0	0	1	0	0	0	1	1	0	0	0	0	1	0	1	0	1	1
		0.851536	0	1	0	1	1	1	0	1	0	0	1	0	1	1	0	1	1	1	0		1	1	1	1	0	1	0	1	1	0	1	1	1	0	1	1	1	0	0
		0.845159	1	0	0	0	1	1	1	1	1	0	0	1	0	1	1	0	1	1	1		0	1	0	0	0	1	0	0	0	1	0	0	1	1	1	1	0	0	1
		0.838648	1	0	0	1	0	0	0	1	0	1	0	0	0	0	1	0	0	0	0		1	0	0	0	1	1	0	0	1	1	1	1	1	0	0	0	1	0	1
		0.832005	0	1	0	1	0	0	1	0	1	1	0	1	0	0	0	1	0	0	1		0	0	0	0	0	0	1	1	0	0	1	1	0	0	0	1	1	1	0
		0.82523	1	1	1	1	0	1	1	1	0	1	1	0	1	1	1	1	0	1	1		1	1	1	1	1	1	1	1	1	0	0	0	1	1	0	0	1	1	1
		0.818325	0	1	1	0	1	0	0	0	1	0	1	0	1	0	0	0	1	1	0		1	1	1	0	0	1	1	0	0	1	0	0	1	1	1	0	0	0	0
		0.811291	1	0	0	0	1	0	0	1	1	1	0	1	0	0	1	1	1	0	1		1	1	1	1	1	0	0	0	1	1	0	1	0	1	1	1	1	0	1
		0.804129	1	0	1	0	1	1	1	0	0	1	0	0	0	0	0	0	1	1	0		0	1	0	1	0	0	1	1	0	0	1	1	1	0	0	1	1	1	0
		0.79684	0	0	1	1	0	0	1	0	0	0	1	1	0	1	1	0	0	0	0		0	0	0	1	0	0	1	1	1	1	1	0	0	0	1	1	0	1	1
		0.789425	0	0	0	1	0	1	0	1	0	0	1	1	1	1	0	0	1	1	1		1	0	1	0	1	1	0	1	0	0	0	1	1	1	1	0	0	1	0
		0.781885	0	1	0	1	1	1	0	0	1	1	0	1	1	1	1	1	1	1	1		1	0	1	1	1	1	1	0	0	1	1	1	0	0	0	0	1	1	1
		0.774222	1	0	0	0	1	0	0	1	1	0	0	0	0	0	0	1	0	0	1		0	1	0	0	1	0	0	0	1	1	1	0	1	1	1	1	0	0	1
		0.766436	1	1	1	1	1	1	1	1	0	0	1	0	1	0	1	0	0	0	0		0	0	1	0	1	0	1	1	0	0	1	0	0	0	0	1	0	0	0
		0.75853	1	1	1	0	0	0	0	0	1	1	0	0	1	0	1	1	0	1	0		0	1	0	1	0	1	1	1	1	1	0	0	0	1	1	0	0	0	1
		0.750504	0	0	1	0	0	1	1	0	0	0	1	0	0	1	0	0	0	1	0		1	1	0	0	0	1	0	0	1	0	0	1	1	1	0	1	1	1	1
		0.742359	0	1	0	0	0	0	0	1	1	1	1	1	0	1	0	1	1	0	1		1	0	1	1	0	1	0	0	0	1	0	1	1	0	1	0	0	0	0
		0.734097	1	0	0	0	1	0	1	0	1	1	0	1	0	1	0	0	1	0	1		0	0	1	1	1	0	1	1	1	0	1	1	0	0	1	1	1	1	0
		0.725719	0	0	0	1	1	1	0	0	0	0	0	0	1	0	0	1	1	0	0		1	0	0	1	0	0	1	1	0	1	1	1	0	0	0	1	1	1	0
		0.717227	0	1	1	1	0	0	1	0	1	1	0	1	0	1	1	1	0	1	1		0	1	1	0	1	1	1	0	1	0	0	0	0	1	1	0	0	1	1
		0.708621	1	1	1	1	0	1	0	1	0	0	1	1	1	0	0	0	0	0	0		1	1	0	0	1	1	0	1	0	1	1	1	1	1	0	0	1	1	1
		0.699903	0	0	0	0	0	1	1	1	0	0	1	1	0	0	1	1	1	1	0		0	1	1	1	0	1	0	0	1	0	1	1	1	1	1	1	1	0	1
		0.691075	1	0	0	0	1	0	0	1	0	0	0	0	1	1	1	1	1	1	1		0	0	1	1	0	0	1	1	1	0	1	0	0	0	0	1	0	1	0
		0.682138	0	1	1	1	1	0	0	1	0	0	0	0	0	0	0	0	0	0	0		1	1	0	1	0	1	0	1	0	0	0	0	1	1	1	1	1	0	0
		0.673093	0	1	1	0	0	0	0	0	1	0	0	1	1	1	1	0	0	1	1		1	0	0	0	1	0	1	0	0	0	1	0	0	0	0	1	0	0	1
		0.663941	1	0	0	1	0	1	0	0	1	1	1	0	1	1	0	0	1	0	1		1	1	1	1	1	0	0	0	1	1	0	1	1	0	1	0	1	0	0
		0.654685	0	0	1	1	1	1	1	0	1	1	1	1	0	0	1	0	1	0	0		0	0	1	0	1	0	1	1	0	1	1	1	1	0	1	0	1	1	0
		0.645326	1	1	0	0	1	1	1	0	0	1	0	0	0	1	1	1	1	0	0		0	1	0	1	0	0	1	0	0	1	0	0	0	1	0	0	0	1	0
		0.635864	0	1	1	1	1	0	1	1	0	1	1	0	0	0	0	0	0	0	0		1	0	1	0	1	1	0	1	0	0	0	0	0	1	1	0	0	1	1
		0.626302	1	0	0	1	0	0	1	0	1	0	0	1	1	1	0	1	0	1	1		1	0	0	0	0	1	1	0	0	0	1	0	0	1	0	1	1	1	1
		0.616641	0	1	0	0	1	0	0	1	1	0	1	1	1	0	0	0	0	1	0		1	1	1	0	1	1	0	0	1	1	0	1	1	1	1	0	0	0	1
		0.606883	1	0	1	0	0	0	0	1	0	0	1	0	1	0	1	1	1	0	0		0	0	1	1	1	1	1	0	1	0	1	1	0	0	0	1	1	1	0
		0.597029	1	0	0	0	1	1	0	0	0	0	0	0	0	1	0	0	1	0	0		1	1	0	1	0	0	1	1	1	0	0	0	1	1	1	0	0	0	1
		0.587081	0	1	0	0	0	1	1	0	1	1	0	0	0	0	0	0	0	0	1		0	1	0	0	0	1	0	1	1	1	1	0	1	0	0	1	1	0	0
		0.57704	0	1	1	0	0	0	1	0	0	0	0	1	1	1	1	1	1	1	1		1	1	1	0	1	1	0	0	0	1	0	1	1	0	1	0	0	1	1
		0.566908	1	0	1	1	0	1	0	1	0	1	1	1	0	1	0	0	0	1	0		0	1	1	1	1	0	1	1	1	1	1	0	0	0	0	0	0	0	0
		0.556686	0	0	0	0	1	1	1	1	1	1	1	0	1	1	1	1	1	1	1		0	0	0	0	0	0	0	0	0	0	1	0	0	1	0	1	1	0	1
		0.546377	1	1	0	1	0	0	0	1	0	1	0	0	0	0	1	1	0	0	1		0	0	1	1	1	0	1	1	0	0	0	0	0	1	1	1	0	0	0
		0.535981	1	0	1	0	1	0	0	0	1	0	1	0	0	0	1	1	0	0	0		1	0	1	0	0	1	1	1	0	1	1	1	1	1	1	1	1	1	1
		0.525501	1	0	1	1	0	0	1	0	1	0	1	1	0	0	0	1	0	1	1		1	0	0	1	0	1	0	0	1	1	0	1	1	0	0	0	1	0	1
		0.514937	0	1	0	1	1	1	0	0	0	0	0	0	0	0	0	0	1	1	1		1	1	1	1	1	0	1	1	1	0	1	1	0	0	0	1	0	1	0
		0.504292	0	0	0	0	1	0	1	1	1	1	0	1	0	1	0	0	0	1	0		0	0	0	1	0	0	0	0	1	1	1	0	0	0	0	1	1	1	1
		0.493568	0	1	0	0	1	1	0	1	0	1	0	0	1	0	1	1	1	0	0		1	1	0	0	1	1	0	0	1	0	0	1	1	0	1	1	0	1	1
		0.482766	0	0	1	1	0	1	1	0	1	1	1	1	1	1	1	1	0	0	0		0	1	0	0	1	1	0	1	0	1	0	1	1	1	1	0	1	0	0
		0.471887	0	1	1	0	0	0	0	0	1	0	1	0	1	0	0	0	1	1	0		0	0	1	1	1	1	1	0	1	0	1	1	0	1	1	1	1	1	0
		0.460934	0	1	1	0	0	0	0	1	0	0	1	0	1	0	0	0	1	1	1		0	0	0	1	1	0	0	1	0	1	1	0	1	0	0	0	0	1	0
		0.449908	1	0	0	0	0	1	0	1	0	1	0	1	1	1	0	0	0	0	1		1	0	1	1	0	0	1	1	0	0	0	0	0	1	1	0	0	0	0
		0.438811	1	1	0	1	0	0	1	0	0	1	0	0	0	0	1	0	1	0	0		1	1	0	0	1	0	1	0	0	1	0	0	1	1	0	0	0	0	1
		0.427645	1	0	0	1	0	0	1	0	1	0	0	1	0	1	1	1	0	0	1		1	1	1	0	0	1	0	0	1	0	1	1	1	1	1	0	1	0	1
		0.416412	1	0	0	1	1	0	1	0	1	1	0	1	1	1	0	0	0	0	0		0	0	1	0	1	1	0	1	1	0	1	1	0	0	0	1	1	0	0
		0.405112	0	0	1	0	1	1	0	0	0	0	1	1	1	0	1	1	0	0	1		0	1	0	1	0	0	1	1	1	1	0	0	0	1	0	1	0	1	0
		0.393749	0	0	0	0	1	1	1	0	0	0	1	0	0	0	0	0	0	1	0		1	1	0	1	0	0	1	0	0	0	0	1	0	0	0	1	0	1	1
		0.382323	0	0	1	1	1	1	0	1	0	1	0	0	0	0	0	1	1	1	0		0	0	0	0	1	1	0	0	0	1	0	1	1	1	1	1	0	1	1
		0.370837	0	1	1	0	0	0	1	0	0	1	1	0	0	1	0	0	0	0	0		1	0	0	1	1	1	0	0	1	1	1	0	1	0	1	0	1	0	0
		0.359293	1	1	1	1	0	0	0	1	1	0	0	1	0	1	0	1	1	1	0		0	0	1	1	0	0	1	0	1	0	1	0	0	0	0	1	1	1	1
		0.347691	0	1	0	1	1	1	0	1	1	1	1	0	0	1	1	0	1	1	1		1	1	0	0	0	1	1	1	0	0	0	0	1	0	0	0	0	1	0
		0.336035	1	0	0	0	0	1	0	0	0	0	0	0	1	0	1	0	0	0	1		0	1	1	0	0	0	0	1	0	0	0	1	1	1	0	0	1	1	0
		0.324326	1	1	0	0	1	0	1	1	1	0	1	0	0	0	1	0	0	0	0		1	1	1	0	0	0	0	0	1	1	0	1	1	1	1	0	0	0	0
		0.312565	0	0	1	1	0	0	0	0	1	0	0	1	1	0	0	0	0	0	1		0	0	1	0	1	1	0	1	0	1	1	1	0	0	1	0	0	0	0
		0.300756	0	0	1	1	1	1	0	0	0	0	0	1	1	0	0	0	1	1	1		1	0	0	1	0	0	1	1	1	1	1	0	0	1	0	1	1	1	1
		0.288898	0	0	0	0	0	0	0	1	0	1	0	1	1	0	1	1	1	0	0		0	1	0	0	1	1	1	0	1	0	0	1	0	0	1	1	0	0	1
		0.276995	1	1	0	0	0	0	0	1	0	1	0	0	1	1	0	1	0	1	0		1	1	1	1	1	0	1	0	0	1	1	0	0	0	1	0	1	0	1
		0.265049	1	1	0	1	0	0	1	0	1	0	1	0	0	0	1	1	0	0	0		1	1	0	1	0	0	0	0	0	0	1	0	1	0	0	1	1	1	1
		0.25306	0	1	0	0	0	0	1	0	0	0	1	0	0	1	0	1	1	1	1		0	0	0	0	1	0	0	1	0	0	0	0	0	0	0	0	1	1	0
		0.241032	0	0	1	0	1	1	0	0	1	0	1	1	1	1	0	0	0	1	1		0	0	1	1	0	0	0	1	1	0	0	0	1	1	1	1	0	0	1
		0.228965	0	1	1	0	1	1	1	1	0	0	0	1	0	1	1	0	1	0	0		0	1	1	0	0	1	1	1	0	1	1	1	1	1	0	0	1	0	0
		0.216862	1	0	0	1	1	1	1	1	0	1	0	0	0	1	1	1	0	1	0		1	0	0	0	1	1	0	0	1	1	0	1	1	1	0	1	0	0	1
		0.204725	1	1	1	0	0	1	0	1	1	1	1	1	0	0	0	0	0	0	0		0	0	1	0	1	1	0	0	0	0	1	1	0	0	1	0	1	0	0
		0.192556	1	0	0	1	0	0	0	0	1	0	1	0	1	0	1	0	0	0	1		1	0	0	1	0	0	1	1	0	1	0	0	1	1	0	0	0	1	1
		0.180356	0	0	1	1	0	0	0	0	0	1	0	1	0	0	0	0	1	0	1		0	1	1	1	0	1	1	1	1	0	0	0	0	1	1	1	1	0	1
		0.168128	1	0	0	0	1	0	1	0	0	0	0	0	0	0	0	1	1	1	0		1	1	0	0	0	1	1	0	0	1	0	1	0	0	0	0	0	0	1
		0.155873	0	0	0	0	1	1	1	0	0	0	0	0	0	0	0	1	1	0	1		1	0	1	1	1	1	0	0	1	0	0	1	0	0	1	1	1	0	0
		0.143594	1	0	0	0	0	0	1	1	1	1	0	0	1	1	0	0	0	0	0		0	0	0	1	1	0	0	1	1	1	1	0	1	1	0	0	0	1	0
		0.131292	0	1	1	0	1	1	0	0	0	0	1	0	1	1	0	0	0	0	1		1	1	0	0	0	1	1	1	1	0	0	0	0	0	1	1	0	1	0
		0.118969	0	1	0	1	0	0	0	0	1	1	1	1	1	1	0	1	0	1	0		1	1	0	0	1	0	0	0	0	1	1	0	1	0	1	0	0	1	0
		0.106628	0	1	0	0	0	0	0	0	1	1	0	1	0	0	1	0	0	1	0		0	0	1	0	0	0	0	0	0	0	1	1	0	1	0	0	0	0	0
		0.0942694	1	0	0	1	0	0	0	1	0	0	0	0	0	0	1	0	1	0	0		0	0	1	0	0	0	1	0	0	0	1	0	0	0	0	0	1	0	0
		0.0818962	1	1	1	0	0	0	0	1	1	1	0	0	0	0	1	1	1	1	1		0	0	0	1	0	0	1	1	1	1	1	1	0	1	0	1	1	0	1
		0.06951	1	0	1	0	1	0	1	0	0	0	1	1	0	1	1	1	0	0	1		0	0	0	1	0	1	0	1	1	0	0	0	1	0	1	1	0	1	1
		0.0571128	0	0	1	1	1	1	0	1	0	0	1	1	1	1	0	0	1	0	0		1	1	1	0	1	1	0	0	0	1	1	1	1	1	0	0	0	1	1
		0.0447066	0	0	0	0	0	1	1	1	0	0	0	0	1	1	0	1	1	0	0		1	1	1	1	1	0	0	0	0	1	0	1	0	0	1	0	1	0	1
		0.0322934	0	0	1	1	0	0	1	1	1	0	1	0	0	0	0	0	0	0	0		0	0	1	0	1	0	1	1	1	0	0	0	0	1	0	1	0	1	0
		0.0198751	0	1	0	0	1	1	0	0	0	0	0	1	1	0	1	0	0	1	0		0	0	0	1	0	0	1	0	1	0	0	0	0	0	1	1	0	1	0
		0.00745358	0	1	0	0	0	0	0	0	0	1	0	0	0	0	0	0	0	1	1		0	0	0	0	1	1	1	0	0	0	0	0	1	0	1	1	1	1	0
		-0.00496908	0	0	0	0	1	0	0	0	0	1	1	0	0	0	1	0	0	1	1		1	1	0	1	1	1	0	1	0	1	1	0	1	1	0	0	1	0	1
		-0.017391	0	0	0	0	0	0	0	0	1	0	0	0	0	0	0	1	1	1	1		0	1	1	0	0	0	0	0	0	0	1	1	1	0	0	1	0	0	0
		-0.0298101	1	0	0	1	0	1	1	1	0	1	1	1	0	0	0	1	0	0	0		1	0	1	0	0	0	0	1	0	1	0	0	0	1	0	0	0	0	1
		-0.0422245	1	0	1	1	1	0	1	0	1	1	0	0	0	0	0	1	1	0	0		1	0	0	0	0	0	1	0	1	0	0	1	1	0	1	1	0	0	0
		-0.0546323	1	1	1	1	0	1	0	1	1	0	0	0	1	1	0	0	0	0	0		1	0	0	0	1	1	0	0	0	1	1	0	0	0	1	0	1	0	1
		-0.0670314	0	1	0	0	1	0	1	0	1	0	0	1	1	1	1	0	0	0	0		1	1	1	1	1	1	0	0	0	0	0	1	0	0	0	0	1	1	1
		-0.0794199	0	0	1	0	1	0	0	0	0	0	0	1	1	1	1	0	0	0	1		0	0	1	1	0	1	0	1	1	0	1	1	0	1	0	0	0	1	0
		-0.0917959	0	1	0	1	0	1	0	1	0	1	1	0	0	0	0	0	0	0	0		0	1	0	1	0	0	1	1	1	1	0	0	0	1	1	0	0	0	0
		-0.104157	1	0	1	0	0	0	1	0	0	0	1	1	1	1	1	1	0	1	1		0	1	0	0	1	1	1	1	1	0	0	0	1	1	1	1	1	1	0
		-0.116502	1	0	1	1	0	1	0	1	1	1	0	0	0	1	0	0	1	1	1		0	0	0	0	0	0	0	0	0	1	1	0	1	0	0	0	1	0	1
		-0.128829	0	1	0	1	0	1	1	1	0	0	0	0	0	0	0	1	1	1	1		0	1	0	0	0	1	1	0	1	1	1	1	0	0	0	1	0	0	0
		-0.141135	1	0	0	0	1	0	0	0	0	0	1	0	0	0	1	0	1	1	0		1	0	0	1	0	0	0	1	1	1	0	0	1	0	0	1	0	0	1
		-0.153419	0	1	0	0	1	0	0	1	1	1	0	0	1	0	1	1	1	0	0		1	1	0	1	0	1	0	0	0	0	0	1	0	1	0	0	0	1	0
		-0.165679	1	0	0	0	0	0	1	0	0	0	1	1	1	1	0	0	0	0	0		1	0	1	0	1	0	0	0	0	0	0	1	1	1	1	0	1	1	1
		-0.177913	0	0	0	1	1	1	0	0	1	1	0	1	0	1	0	0	0	0	0		1	0	1	0	1	0	0	0	0	0	1	0	0	0	1	0	1	0	1
		-0.190118	0	0	1	0	0	1	1	0	0	0	0	1	0	0	0	1	0	1	0		0	0	1	0	0	1	1	1	1	1	0	0	0	1	1	1	0	1	0
		-0.202294	1	0	0	0	0	0	1	0	0	0	0	0	0	0	1	1	1	0	0		0	0	0	1	0	0	1	1	0	0	0	0	0	0	0	0	0	1	0
		-0.214438	0	1	1	1	0	0	0	1	0	1	1	0	0	0	0	0	1	1	0		0	1	1	0	1	1	0	0	0	0	0	1	1	0	1	0	0	0	0
		-0.226547	0	1	1	0	0	0	0	0	0	0	1	0	0	0	0	0	0	0	1		0	1	1	1	1	0	0	0	0	1	1	1	1	1	0	0	1	0	1
		-0.238621	0	0	0	0	1	1	0	0	1	0	0	0	1	1	0	0	0	0	1		0	0	0	0	0	0	1	0	0	0	1	0	1	0	0	1	1	0	0
		-0.250657	0	1	0	0	1	0	1	1	1	0	0	0	1	1	1	1	0	0	0		1	0	0	0	0	0	1	0	1	0	1	0	0	1	0	1	0	1	1
		-0.262654	1	0	0	0	1	1	0	1	0	0	0	0	0	0	1	1	1	0	1		1	1	1	0	1	1	0	1	1	0	0	0	1	1	1	0	0	1	0
		-0.274609	1	0	1	1	0	1	0	0	0	1	0	1	0	0	0	0	0	0	0		1	1	1	1	0	1	0	1	1	1	0	1	0	0	1	1	0	0	1
		-0.286521	0	0	1	1	0	0	1	1	0	1	1	1	1	0	1	0	1	1	1		0	0	0	0	0	0	0	0	0	1	0	1	0	0	1	0	1	0	0
		-0.298388	0	1	1	0	0	0	0	0	0	0	1	0	1	1	0	0	1	1	0		0	0	0	1	1	0	1	1	0	1	1	0	0	0	0	1	0	1	0
		-0.310207	1	0	0	0	0	0	1	0	1	1	0	0	0	1	0	0	0	0	1		0	0	0	1	0	0	1	0	1	0	0	0	0	0	0	0	0	0	0
		-0.321978	0	0	0	1	1	0	0	0	0	0	0	1	0	0	0	1	0	0	0		0	1	0	0	1	1	0	1	1	0	1	1	1	1	0	0	0	0	0
		-0.333697	1	1	0	0	1	0	0	0	1	1	0	0	1	0	0	1	0	1	1		1	1	1	0	1	1	0	0	0	0	0	0	1	1	0	0	1	0	1
		-0.345364	0	1	0	0	0	0	1	0	1	0	1	1	0	0	0	0	0	0	0		0	0	1	0	0	0	0	0	0	1	1	0	1	0	1	0	1	1	0
		-0.356977	0	0	1	1	1	0	0	1	1	1	1	1	0	1	1	0	0	1	0		1	0	0	1	0	0	0	1	1	1	1	1	0	0	0	1	1	1	1
		-0.368533	0	0	0	0	0	1	0	1	0	0	1	0	0	1	0	0	1	1	0		1	0	1	1	0	0	1	1	0	0	0	0	0	0	1	1	0	0	0
		-0.380031	1	0	1	1	0	1	0	0	0	0	0	0	1	0	1	0	0	0	0		0	1	0	0	0	0	1	0	0	1	0	1	1	1	1	0	1	0	0
		-0.391468	0	1	1	0	0	1	1	0	0	0	0	0	0	0	0	0	0	0	1		0	1	0	1	1	1	0	0	0	1	0	0	1	1	0	1	0	0	1
		-0.402844	0	0	0	0	0	0	0	1	0	0	0	0	1	0	0	1	1	0	1		0	0	0	0	1	0	0	0	0	0	0	0	0	0	0	0	0	1	0
		-0.414157	1	0	0	0	1	1	0	0	1	0	0	0	1	1	0	0	1	0	1		1	0	0	1	0	1	0	0	1	0	1	0	0	0	0	0	0	1	1
		-0.425404	0	1	0	0	1	0	1	0	0	1	0	1	0	1	1	1	0	1	0		1	0	0	0	1	0	1	1	1	0	0	1	0	0	0	1	0	0	0
		-0.436584	1	0	0	0	0	0	1	1	0	1	0	0	0	0	1	1	0	0	0		1	1	1	0	0	0	1	1	0	0	1	1	0	0	0	0	0	0	1
		-0.447695	1	1	0	1	0	0	1	0	0	0	1	1	1	0	0	1	0	1	0		0	1	1	0	0	1	0	0	1	0	0	0	0	1	1	1	1	1	0
		-0.458735	0	1	1	1	1	1	0	1	1	0	1	0	1	0	0	0	0	1	0		0	0	1	1	0	0	1	1	0	1	1	0	1	0	0	1	1	0	1
		-0.469703	0	0	1	1	0	0	0	1	1	0	1	0	0	0	0	0	1	0	0		0	0	0	1	0	1	1	1	0	0	0	0	1	1	1	0	1	0	0
		-0.480596	0	0	0	0	0	0	0	0	0	0	0	1	0	0	1	0	1	0	0		0	0	0	0	0	1	0	0	1	1	1	1	0	1	1	0	0	0	0
		-0.491414	1	0	1	0	0	0	0	0	0	1	0	0	0	0	1	1	0	0	0		1	0	0	1	1	0	0	0	0	1	0	1	1	1	1	0	1	0	0
		-0.502154	0	0	0	0	0	1	0	0	0	0	0	1	0	1	1	0	0	0	1		0	0	0	0	1	1	0	0	1	0	1	0	0	0	0	1	1	1	0
		-0.512815	0	0	0	1	0	0	0	0	1	1	0	1	0	1	0	0	0	0	1		0	1	0	0	0	0	0	0	1	0	0	0	0	0	1	0	0	1	1
		-0.523395	0	0	0	1	1	1	0	0	0	1	1	0	0	1	0	0	0	0	0		0	1	1	0	1	0	0	0	0	0	1	1	1	0	0	0	0	1	1
		-0.533892	0	0	0	0	1	1	1	1	0	0	0	0	0	0	0	1	1	1	1		0	1	0	0	0	0	0	1	0	1	0	1	1	0	0	0	0	0	0
		-0.544305	1	1	0	1	1	0	1	1	0	1	0	0	1	0	0	1	0	0	0		1	0	1	0	1	0	1	0	0	1	0	0	0	1	1	0	0	0	1
		-0.554631	1	1	0	0	0	0	1	0	1	0	0	0	1	1	0	0	0	1	0		0	0	1	1	0	0	1	1	0	0	0	0	0	0	0	1	0	1	0
		-0.564871	0	0	1	0	0	0	0	1	1	1	1	0	1	0	0	0	1	1	1		1	0	0	1	1	1	1	1	1	0	0	0	0	1	0	1	0	1	1
		-0.575021	0	1	1	0	0	1	0	0	0	0	1	0	0	0	0	0	1	0	1		0	1	1	0	0	1	0	0	0	0	0	0	0	1	0	0	1	0	0
		-0.58508	0	0	0	0	0	0	0	0	0	0	0	1	0	0	1	0	0	0	0		0	0	0	0	0	0	0	0	1	0	1	1	1	0	0	0	1	0	0
		-0.595047	1	1	0	0	1	0	1	0	0	0	1	0	0	0	1	0	0	0	0		0	0	0	0	0	1	0	0	0	1	1	1	0	0	1	0	0	0	0
		-0.60492	0	0	1	1	0	0	1	0	0	0	0	1	0	1	1	0	0	0	0		1	0	0	1	0	0	0	1	0	1	0	0	1	0	0	0	0	0	0
		-0.614698	1	0	1	1	1	1	0	1	1	0	0	1	1	1	0	0	1	0	1		1	1	1	1	0	1	1	0	1	0	1	0	0	0	1	1	0	1	1
		-0.624378	0	1	0	1	1	1	0	1	1	0	1	0	1	0	0	1	0	0	0		1	1	0	0	1	1	1	0	0	1	1	1	0	1	0	0	1	0	1
		-0.63396	0	0	0	0	0	0	0	0	0	1	0	0	0	0	0	1	1	1	1		0	0	0	0	1	0	0	0	1	0	0	1	0	0	1	1	1	1	0
		-0.643441	0	0	0	0	0	1	1	0	1	1	0	0	0	0	0	1	0	0	0		0	0	0	1	1	0	0	1	0	1	0	0	1	1	1	1	0	0	1
		-0.652821	1	0	1	0	0	0	0	0	0	0	0	0	1	0	0	1	1	1	1		0	0	1	1	0	0	0	1	0	0	0	0	1	1	0	1	0	0	1
		-0.662098	1	1	1	1	1	0	0	1	0	1	1	1	0	1	0	0	0	1	0		0	0	0	0	0	0	0	0	1	1	0	0	0	0	0	0	0	1	0
		-0.671271	0	1	0	0	1	0	1	1	0	0	1	1	0	1	1	0	0	1	1		1	1	1	0	0	0	0	0	0	0	1	0	0	0	1	0	1	0	0
		-0.680337	0	0	0	1	0	1	1	0	0	0	0	1	0	0	1	0	0	0	0		0	1	0	0	0	1	1	0	0	0	1	0	0	0	0	0	1	1	0
		-0.689296	1	0	0	0	0	1	0	0	0	0	1	0	0	0	0	1	1	0	0		1	0	0	1	0	1	1	1	0	0	0	0	1	0	0	0	1	0	0
		-0.698146	0	1	1	0	0	0	0	0	1	0	0	1	1	0	0	0	0	1	1		1	1	0	1	1	0	1	1	1	0	1	1	1	1	0	1	0	0	0
		-0.706886	0	1	1	0	0	0	0	0	1	1	0	0	1	1	0	0	1	1	0		1	1	0	0	1	0	0	0	1	0	0	1	1	1	0	0	0	0	1
		-0.715514	0	0	0	0	0	0	0	1	0	1	0	0	1	1	0	0	0	0	0		0	0	1	0	1	0	0	0	0	1	0	1	0	0	1	1	0	0	0
		-0.72403	0	0	0	1	0	0	0	1	1	0	0	0	0	0	1	1	1	0	0		0	0	1	1	0	0	1	1	1	1	0	0	0	0	0	0	1	1	1
		-0.732431	0	0	0	0	1	0	0	0	0	0	0	0	0	0	1	1	0	0	0		0	0	0	0	0	1	1	1	0	1	0	0	0	0	1	0	0	1	0
		-0.740716	0	0	1	1	0	0	1	0	0	0	1	0	0	0	1	0	1	0	0		0	1	1	0	0	1	0	0	0	0	0	0	0	1	0	1	0	0	0
		-0.748884	1	0	0	0	1	0	0	0	1	1	1	0	0	0	0	1	0	0	0		1	1	0	0	0	0	0	0	0	1	1	1	0	1	0	0	1	0	1
		-0.756934	0	1	0	0	1	1	1	1	0	1	1	1	0	1	1	0	0	0	1		0	0	0	0	1	1	0	0	0	0	1	1	1	0	0	1	1	0	0
		-0.764865	1	0	0	0	0	1	1	1	1	0	0	0	0	0	0	0	0	0	1		0	0	0	1	1	0	1	1	0	1	1	0	1	1	0	0	0	1	1
		-0.772675	1	1	0	0	0	1	0	0	0	0	0	1	0	0	0	0	0	1	0		0	0	0	1	0	1	0	1	1	0	0	1	0	0	0	1	0	1	0
		-0.780362	0	1	0	1	1	0	0	0	0	1	0	1	1	1	0	0	0	1	1		0	0	1	0	1	0	0	0	1	0	0	0	1	0	1	1	0	0	0
		-0.787927	1	0	1	0	0	0	0	0	0	1	0	0	1	1	0	0	0	1	0		0	1	1	1	0	1	0	0	0	0	1	0	1	0	1	0	0	1	1
		-0.795367	0	0	1	0	0	0	1	1	0	0	0	0	0	1	0	1	1	1	0		1	0	1	0	0	0	0	0	0	0	0	0	0	0	1	0	0	0	0
		-0.802681	1	0	0	1	0	1	1	1	1	0	0	0	0	0	1	0	1	0	0		1	1	0	0	0	0	1	1	1	0	0	0	0	1	0	0	0	0	1
		-0.809869	0	0	1	1	0	0	0	0	1	0	1	0	1	0	1	1	0	0	0		0	1	0	0	1	0	1	1	1	0	0	1	0	0	1	0	1	0	1
		-0.816929	0	0	0	1	1	1	0	0	1	1	1	0	1	0	1	0	1	0	0		1	0	0	0	0	0	0	0	0	1	0	1	0	0	0	0	0	0	0
		-0.82386	0	1	0	0	1	0	0	0	0	0	0	1	0	0	0	0	0	0	1		0	0	0	1	0	1	1	1	0	1	1	0	0	0	0	1	0	1	0
		-0.830661	0	1	1	0	0	0	1	0	0	0	1	0	0	0	1	1	0	0	1		1	0	0	1	1	0	1	0	0	0	1	0	0	1	0	1	1	1	0
		-0.83733	0	0	0	0	1	0	0	0	0	0	0	1	0	0	0	0	1	0	0		0	0	1	0	0	1	0	0	1	0	0	0	1	1	0	0	1	1	0
		-0.843867	0	0	1	0	0	0	0	0	0	0	1	0	0	1	0	1	0	0	1		0	0	1	0	1	0	0	0	1	0	1	0	1	0	1	1	0	0	0
		-0.850272	1	1	0	0	1	0	1	1	0	0	0	1	0	0	0	0	1	0	1		0	1	1	0	1	0	0	0	0	1	0	1	0	0	1	0	1	0	0
		-0.856541	0	1	0	1	0	1	0	1	1	1	0	0	1	0	0	0	0	1	0		0	0	0	0	0	1	0	1	0	1	0	1	1	1	0	1	1	0	1
		-0.862676	1	0	0	0	0	1	1	0	0	1	0	0	1	1	0	0	0	1	0		1	1	0	1	0	0	1	1	0	1	0	0	1	0	0	0	0	0	1
		-0.868674	0	1	0	1	0	1	0	0	1	0	0	0	0	0	0	1	0	1	0		1	1	0	1	1	1	0	0	0	0	0	0	0	0	0	0	0	1	1
		-0.874535	0	0	0	0	0	0	1	0	0	0	1	0	1	1	0	1	0	0	0		1	1	0	0	0	0	0	0	0	0	1	1	0	0	0	0	0	0	0
		-0.880259	1	0	0	0	0	0	0	0	0	0	0	1	0	0	0	0	1	1	0		0	0	0	0	0	1	0	0	0	0	1	0	0	0	1	0	0	0	0
		-0.885843	0	0	0	0	0	0	0	1	0	0	1	1	1	0	1	0	1	0	1		0	0	0	0	1	0	1	0	1	0	0	0	0	1	0	1	1	1	0
		-0.891287	0	0	1	0	1	0	0	1	0	1	0	1	0	1	1	0	1	1	1		0	0	1	1	0	0	1	0	1	0	0	1	1	1	1	1	0	0	0
		-0.89659	0	0	0	1	1	1	0	1	1	1	0	0	0	0	1	0	0	0	0		0	0	1	0	1	0	0	1	0	0	0	0	1	0	1	0	1	0	0
		-0.901752	1	0	1	1	1	0	0	0	1	0	0	0	0	1	0	0	0	0	0		1	0	0	1	0	0	0	0	0	1	1	0	0	0	0	0	1	0	1
		-0.906772	1	1	1	1	0	1	0	0	0	1	0	0	0	1	0	0	0	0	0		0	0	1	1	0	1	0	0	1	1	0	0	0	0	0	1	0	0	0
		-0.911648	0	1	1	0	0	1	1	0	0	0	0	0	0	0	0	1	0	0	1		1	1	0	1	0	1	0	1	1	1	1	0	0	1	0	0	0	1	1
		-0.91638	1	1	0	0	0	0	1	1	0	1	0	0	1	0	0	1	0	0	1		1	1	1	0	0	0	1	1	0	0	0	1	0	1	0	0	0	1	0
		-0.920968	0	0	0	0	1	0	1	0	0	0	1	0	0	0	1	1	0	0	0		0	0	0	0	1	1	1	0	0	1	1	1	0	1	1	0	0	1	1
		-0.92541	0	0	1	0	0	0	0	0	1	0	1	1	1	0	1	0	1	1	0		0	0	0	0	1	0	0	0	0	0	1	1	0	0	1	0	0	0	0
		-0.929706	0	0	0	0	1	0	0	1	1	0	1	1	0	0	0	0	1	1	0		0	0	0	0	0	0	1	0	0	0	0	0	1	0	0	0	0	1	1
		-0.933855	0	0	0	1	0	0	0	1	0	0	1	1	1	0	0	0	0	0	0		0	1	0	0	0	0	0	1	1	0	0	0	1	0	1	1	0	0	0
		-0.937857	1	0	0	0	0	0	0	0	1	0	0	0	0	1	1	0	1	0	0		0	1	0	0	0	0	0	1	0	1	0	0	1	0	0	1	1	0	0
		-0.941711	1	0	0	1	0	0	0	0	0	0	0	0	0	0	1	1	0	0	0		1	0	1	1	0	0	0	0	0	1	0	0	0	0	1	0	1	0	1
		-0.945416	0	0	1	0	0	0	1	0	0	1	0	0	0	1	0	0	0	0	1		0	0	1	1	1	1	1	1	1	0	0	0	1	0	0	0	1	0	0
		-0.948971	0	1	1	1	0	0	0	0	0	1	0	1	1	1	0	1	0	0	1		1	1	0	0	1	0	1	0	1	0	0	1	0	1	0	1	0	0	1
		-0.952377	0	1	0	1	1	1	1	0	0	0	0	0	0	0	0	1	0	1	0		1	1	0	0	0	1	0	0	0	0	1	1	0	1	0	1	0	1	1
		-0.955632	0	0	0	0	1	1	1	1	0	0	0	0	0	1	0	0	1	1	0		0	0	1	0	1	0	0	1	0	0	1	0	0	0	0	0	1	1	0
		-0.958737	0	1	1	0	1	1	0	0	0	1	0	0	1	0	0	0	0	0	0		0	0	1	0	0	0	0	0	0	1	0	0	1	0	1	0	1	0	0
		-0.96169	1	0	1	0	0	0	1	1	1	0	1	0	0	1	1	0	0	1	0		0	0	0	1	0	1	1	1	1	1	0	0	0	1	0	0	0	1	0
		-0.964491	1	0	0	0	0	1	0	0	1	1	1	0	0	0	0	0	1	1	1		0	0	1	1	0	0	1	0	1	0	0	1	1	0	1	1	0	0	1
		-0.96714	0	0	0	0	0	0	0	1	1	1	1	1	0	0	1	0	0	0	1		1	0	0	0	0	1	1	0	0	0	1	0	1	0	0	1	0	1	0
		-0.969636	1	0	0	0	1	0	0	0	0	0	0	0	0	0	0	0	1	0	0		0	1	0	0	0	0	0	0	1	0	1	1	0	0	0	0	0	0	0
		-0.97198	0	1	1	1	0	0	0	0	1	0	0	1	1	0	0	1	0	0	0		1	0	0	0	1	0	0	0	0	0	0	0	0	1	0	0	0	1	0
		-0.974169	0	1	0	1	0	0	0	0	0	0	0	1	1	1	1	1	1	0	0		0	1	0	1	0	0	0	1	0	1	0	0	0	1	0	0	1	0	0
		-0.976205	0	1	0	0	1	0	0	0	0	0	1	0	0	0	0	0	0	0	1		0	0	0	1	1	0	0	1	0	0	1	1	0	0	1	0	0	0	1
		-0.978087	0	0	0	0	0	1	1	1	0	0	1	0	0	0	1	1	0	1	1		0	0	1	0	1	1	0	1	0	1	0	0	1	0	1	1	1	0	1
		-0.979814	1	0	0	0	0	0	1	1	1	0	0	0	0	1	0	0	0	0	1		1	1	0	0	0	1	0	0	1	0	1	1	1	0	1	0	1	1	0
		-0.981386	1	0	1	0	0	1	1	0	0	1	0	0	0	0	0	0	0	1	0		0	0	1	0	0	0	1	0	1	0	1	0	0	0	0	1	0	1	0
		-0.982804	1	0	1	1	0	0	0	0	0	0	0	0	0	0	0	0	0	0	1		1	1	0	1	0	0	1	0	0	1	0	0	1	1	0	1	0	0	0
		-0.984066	0	0	0	1	0	1	0	0	1	1	1	1	1	1	0	0	0	0	0		1	1	1	0	1	0	0	0	0	0	0	0	0	1	1	0	0	0	0
		-0.985173	0	0	0	1	1	0	0	0	0	1	0	1	0	0	1	0	1	0	0		0	0	1	0	1	1	0	0	0	1	0	0	0	1	0	0	1	0	1
		-0.986124	0	1	0	0	1	1	0	1	1	0	0	0	1	0	1	1	1	0	0		0	0	0	0	0	1	0	0	0	0	0	1	0	0	0	0	1	0	0
		-0.98692	0	1	0	1	0	0	0	0	0	0	1	0	0	0	1	1	0	1	0		0	0	0	0	0	0	1	1	1	1	1	0	0	0	0	1	0	0	1
		-0.98756	1	0	1	0	0	1	0	1	0	1	0	0	1	1	0	0	1	1	0		1	0	0	1	0	0	1	1	1	0	0	1	1	0	1	1	1	1	1
		-0.988043	0	0	1	1	0	0	0	0	0	0	0	1	1	1	0	1	1	0	0		1	1	0	0	0	0	0	1	0	0	0	1	0	1	0	0	0	0	0
		-0.988371	1	0	0	0	1	0	1	1	0	0	0	1	0	0	0	0	0	1	0		0	0	1	1	1	0	0	0	0	0	1	0	1	0	0	0	0	1	0
		-0.988543	1	0	1	0	0	0	1	0	1	0	0	0	0	0	1	0	0	0	1		0	0	1	1	1	1	0	0	0	0	1	0	0	0	0	0	1	1	0
		-0.988559	0	1	0	0	0	0	1	0	1	0	0	0	0	0	1	0	0	0	0		0	1	0	0	0	0	1	0	1	1	0	0	0	0	1	0	0	0	0
		-0.988418	0	1	0	0	1	0	0	1	1	1	0	1	0	0	0	0	0	1	1		0	1	0	0	1	1	1	0	1	0	0	0	0	0	1	0	1	0	0
		-0.988121	0	0	1	0	1	1	1	0	0	1	1	0	1	0	0	1	0	0	1		1	0	1	0	0	1	0	1	0	1	0	1	1	1	0	0	0	0	1
		-0.987669	0	1	0	0	0	1	0	0	0	0	1	0	0	1	0	1	1	0	0		0	0	0	1	0	0	1	0	0	1	0	1	0	1	0	1	0	0	0
		-0.98706	1	0	0	1	0	1	0	0	0	0	0	0	1	0	0	1	1	0	0		1	0	0	1	0	0	0	1	0	0	0	0	1	0	0	1	0	1	1
		-0.986296	0	1	1	1	1	0	0	0	0	0	1	1	0	0	1	0	0	0	0		0	1	0	1	0	0	0	1	0	0	0	0	1	1	0	0	0	1	1
		-0.985376	0	0	1	1	0	0	0	1	0	0	1	1	0	1	0	0	1	0	1		0	1	0	0	0	0	1	0	1	0	1	0	0	0	1	0	1	0	0
		-0.9843	1	0	0	0	0	0	1	1	0	1	0	0	0	1	1	1	0	0	1		0	0	1	0	0	0	0	0	0	1	1	0	0	0	1	0	1	1	0
		-0.983069	0	0	0	0	1	0	1	1	1	1	0	0	0	1	0	0	0	1	0		0	0	0	0	1	1	0	0	1	1	1	1	0	0	1	0	0	0	0
		-0.981682	0	0	0	0	1	0	1	0	1	0	0	1	1	0	1	0	0	0	0		1	0	0	0	0	0	0	1	0	0	0	0	0	0	0	0	0	0	1
		-0.980141	0	1	0	1	0	0	0	0	1	0	0	0	1	0	0	0	0	1	0		1	1	1	0	1	1	1	1	0	0	1	1	1	0	1	1	1	0	1
		-0.978444	1	1	0	0	0	0	0	0	0	1	1	0	0	0	0	0	0	1	0		1	1	1	1	1	1	0	0	1	0	0	1	0	0	0	0	0	0	0
		-0.976594	1	1	1	0	0	1	0	0	0	0	0	0	0	0	0	0	1	1	0		0	0	1	1	1	1	1	0	0	1	0	0	0	0	0	1	0	1	0
		-0.974589	0	0	0	0	1	1	1	0	0	0	0	0	1	0	0	1	1	0	1		0	0	0	0	0	0	0	0	1	1	1	0	0	1	0	1	0	1	1
		-0.97243	1	0	1	1	0	1	1	0	0	0	0	0	0	1	1	1	1	0	0		0	0	0	0	0	0	0	0	1	0	0	0	1	1	0	1	0	1	0
		-0.970117	1	0	1	1	0	0	0	1	0	0	0	1	0	0	1	0	0	0	1		1	1	0	0	0	0	0	1	1	0	1	1	1	1	0	0	1	0	0
		-0.967652	0	0	0	0	0	0	0	1	1	1	1	1	0	1	0	0	1	0	1		0	1	0	0	0	1	0	1	0	0	0	1	1	1	1	0	1	0	1
		-0.965033	0	0	0	0	0	0	0	0	0	1	1	0	0	1	1	1	0	0	0		0	0	0	1	0	1	0	0	0	0	0	1	0	0	1	0	1	0	0
		-0.962262	0	0	0	0	0	0	0	1	1	1	1	0	0	1	0	1	0	0	0		1	0	1	1	0	0	1	1	0	0	0	0	0	1	0	0	0	0	1
		-0.95934	0	0	1	0	1	1	0	0	1	0	0	0	1	0	0	0	0	1	0		1	0	1	0	1	0	1	0	0	0	0	0	0	0	1	1	0	1	1
		-0.956265	0	1	1	1	0	0	1	1	0	0	1	1	1	0	0	0	0	1	1		0	1	1	1	1	0	1	0	0	1	1	0	0	0	0	1	0	0	0
		-0.95304	1	1	0	1	1	1	0	0	0	0	0	1	1	0	0	1	0	1	0		0	0	0	0	1	0	0	0	0	1	1	0	0	0	0	0	1	0	0
		-0.949664	0	1	0	0	1	0	1	0	0	0	0	1	0	0	1	0	1	0	1		0	1	0	0	0	0	1	1	1	1	1	0	1	1	0	1	1	0	0
		-0.946139	1	0	0	0	0	1	0	1	0	1	0	0	0	0	1	0	1	0	1		0	0	0	1	0	1	1	1	1	0	0	1	1	1	1	0	0	1	0
		-0.942463	0	1	0	0	0	1	0	0	1	0	0	0	0	0	1	1	0	0	0		1	0	1	0	0	1	0	1	1	0	0	1	1	0	1	1	0	1	1
		-0.938639	0	0	1	1	0	0	1	1	1	1	1	0	0	1	0	0	1	0	0		0	0	1	1	1	1	0	0	0	1	0	1	0	0	0	0	0	0	0
		-0.934667	1	0	1	1	0	0	0	0	1	0	1	0	1	1	0	1	0	1	1		1	0	0	0	1	0	0	0	0	0	1	0	0	1	0	0	0	0	1
		-0.930548	0	0	0	0	1	0	1	0	0	0	0	1	1	1	0	0	0	1	0		1	0	1	1	0	0	0	0	0	0	0	0	0	0	0	0	1	1	0
		-0.926281	1	0	0	1	1	0	1	0	1	1	0	0	0	0	0	1	1	0	1		0	1	0	0	1	0	0	0	0	0	0	0	1	0	1	0	0	0	0
		-0.921868	1	0	0	0	1	0	0	0	0	0	0	1	1	0	1	0	0	1	0		0	1	0	0	0	0	0	0	0	1	0	1	1	1	1	1	1	0	0
		-0.917309	0	1	1	0	0	0	0	0	0	0	0	1	0	0	1	0	0	0	1		0	1	0	0	0	1	0	0	1	1	0	1	0	0	0	0	1	0	0
		-0.912606	0	1	1	0	0	0	0	1	1	0	1	0	0	0	0	0	0	0	0		0	0	0	0	0	1	0	1	1	1	1	0	0	1	0	1	0	1	1
		-0.907758	0	1	1	0	0	1	0	1	0	1	1	0	0	0	1	0	1	0	0		1	0	1	1	0	0	1	1	1	0	0	0	0	1	0	1	0	0	1
		-0.902767	0	0	0	0	1	1	1	1	0	1	0	0	1	0	0	0	0	0	0		1	0	1	0	0	1	1	1	0	0	1	0	0	0	0	0	0	1	0
		-0.897634	0	1	0	1	0	1	1	0	0	0	1	0	0	0	0	1	0	0	0		0	0	1	1	1	0	0	0	0	1	1	1	1	0	1	0	0	0	1
		-0.892359	1	0	0	1	0	0	0	0	0	1	0	1	1	1	0	0	0	1	0		1	0	0	0	1	0	1	1	0	1	1	1	0	0	1	0	1	1	0
		-0.886943	1	0	0	1	1	1	1	0	1	1	0	1	1	1	0	1	1	1	1		0	1	0	0	1	0	1	0	0	0	0	0	1	0	0	1	1	1	1
		-0.881386	0	0	0	0	1	0	0	1	0	0	0	0	1	1	0	1	1	1	1		0	1	0	1	0	1	0	0	1	0	0	0	1	0	1	1	0	0	0
		-0.875691	1	0	0	0	0	1	0	0	1	0	0	0	0	0	1	0	1	0	0		0	1	0	0	1	1	1	0	1	0	1	0	0	1	0	0	1	0	0
		-0.869858	1	1	1	0	0	0	0	1	1	0	1	0	0	0	1	1	0	1	1		0	0	1	1	0	0	0	0	0	0	1	0	0	1	0	0	0	0	0
		-0.863887	0	1	1	0	0	0	1	0	1	0	1	0	0	0	1	0	1	0	0		1	0	1	0	0	0	1	1	1	0	0	0	1	0	0	1	1	0	1
		-0.857779	0	0	1	0	0	0	0	0	0	0	1	1	0	1	0	1	0	0	0		1	1	0	0	0	0	0	1	0	1	0	1	0	0	1	0	0	1	1
		-0.851536	0	1	0	1	1	0	1	1	0	1	0	1	1	1	1	0	0	0	0		0	0	0	1	0	1	0	1	0	0	0	1	0	1	1	0	0	1	0
		-0.845159	0	0	1	0	1	1	1	0	0	1	0	0	0	1	0	0	0	0	1		0	0	1	0	1	1	0	0	0	1	1	1	0	0	0	0	1	0	0
		-0.838648	1	1	0	1	1	0	0	0	0	0	1	1	1	0	0	1	0	1	0		0	0	1	1	1	0	0	0	0	1	0	1	1	0	0	0	0	1	0
		-0.832005	1	0	0	1	0	1	0	1	0	1	1	1	1	0	0	0	0	0	1		1	1	0	1	0	0	1	0	1	1	0	0	1	1	0	1	0	0	0
		-0.82523	0	0	0	0	0	1	0	0	0	1	0	0	0	1	0	0	1	1	1		1	1	0	0	0	0	1	1	1	0	0	0	0	1	1	1	0	0	0
		-0.818325	1	0	0	1	0	0	1	0	1	0	1	0	0	1	0	0	1	1	1		0	1	0	0	1	1	0	1	1	0	1	0	0	0	1	0	0	0	1
		-0.811291	0	0	0	0	1	0	1	0	1	0	0	0	0	0	1	0	1	0	0		0	0	0	1	0	1	0	0	0	0	0	1	0	0	0	0	1	1	0
		-0.804129	0	1	0	1	1	0	0	1	0	0	0	1	0	0	1	1	0	1	0		0	0	0	0	0	0	1	0	0	0	0	0	0	1	0	0	1	1	1
		-0.79684	0	1	1	0	0	0	0	1	1	0	0	1	0	0	1	0	1	0	0		1	0	0	0	0	0	1	0	1	0	0	0	1	0	0	0	0	0	0
		-0.789425	0	0	1	1	1	1	1	0	1	0	1	0	1	0	0	1	0	0	1		0	1	1	0	1	1	0	0	0	1	1	0	1	0	1	1	1	0	1
		-0.781885	1	0	1	0	0	1	0	0	0	0	0	0	1	0	1	0	0	0	0		0	1	1	0	1	1	0	0	0	0	1	1	1	0	1	0	0	0	1
		-0.774222	0	0	0	0	0	0	0	0	0	1	0	0	0	1	0	1	0	1	0		0	0	1	0	0	0	0	1	0	1	1	1	0	0	1	1	0	0	0
		-0.766436	0	1	1	1	0	0	1	1	0	0	1	0	0	0	0	1	0	1	0		1	0	0	1	0	0	1	0	0	1	0	0	1	1	0	1	1	1	0
		-0.75853	1	0	0	0	0	1	0	1	1	1	0	1	1	1	0	0	1	0	1		1	0	1	1	0	0	1	0	1	0	0	1	0	1	0	1	0	1	1
		-0.750504	0	1	0	0	0	1	0	1	0	1	0	0	0	0	0	0	1	0	1		1	0	1	0	0	1	0	1	1	1	0	1	0	1	0	0	1	0	1
		-0.742359	1	1	0	0	0	0	1	0	1	1	0	1	1	1	1	0	0	0	0		0	0	0	1	1	1	0	1	0	0	0	0	0	0	1	1	1	1	0
		-0.734097	0	0	0	0	1	0	1	0	1	0	1	0	0	0	0	1	0	0	0		1	0	0	0	1	0	1	0	1	0	1	0	0	0	0	0	1	0	0
		-0.725719	0	0	1	0	1	0	0	0	0	0	1	1	1	0	0	0	1	1	0		0	1	0	1	1	0	1	1	0	1	0	0	1	0	1	0	0	0	0
		-0.717227	1	1	1	1	0	1	0	0	0	0	0	1	1	0	0	1	0	0	1		0	1	1	0	0	0	0	1	0	0	1	0	1	1	0	1	0	1	1
		-0.708621	0	1	1	1	1	1	0	1	0	0	0	0	0	1	1	0	0	1	1		1	1	1	1	1	0	0	0	0	0	1	1	1	1	0	0	0	0	0
		-0.699903	1	0	0	1	1	0	1	1	0	1	0	0	0	1	1	0	1	0	1		0	0	0	0	0	1	0	0	1	0	1	1	0	0	1	0	0	1	0
		-0.691075	0	0	0	0	1	0	1	0	1	1	1	1	0	0	1	1	0	0	0		1	1	0	0	0	0	0	1	1	1	0	0	1	1	0	1	1	0	0
		-0.682138	1	0	0	0	0	1	0	1	1	0	1	0	1	1	0	1	1	1	0		1	0	0	1	0	1	1	1	1	0	0	1	0	1	1	1	0	0	1
		-0.673093	1	1	1	1	0	0	1	0	0	1	1	0	0	1	1	0	0	1	0		0	0	1	0	1	1	1	0	0	1	0	1	0	0	0	1	1	0	1
		-0.663941	0	1	1	1	1	0	0	1	1	1	0	0	0	0	0	1	1	0	1		0	1	1	1	1	0	0	0	0	1	1	0	0	0	1	0	1	1	1
		-0.654685	0	0	0	0	0	0	0	1	0	0	0	1	1	0	1	0	1	1	1		0	0	0	0	1	0	1	0	1	0	1	0	0	0	0	1	1	1	0
		-0.645326	1	0	0	1	0	1	0	0	0	0	1	0	0	0	1	0	0	0	0		0	1	0	0	0	0	0	1	1	1	0	0	1	1	1	0	0	1	1
		-0.635864	0	0	0	0	0	0	1	0	0	0	0	1	1	1	0	1	0	1	0		1	1	0	0	0	1	0	0	0	0	0	0	1	1	0	0	1	0	0
		-0.626302	0	0	0	0	0	1	0	0	1	1	1	1	0	1	0	0	0	0	0		1	0	1	1	0	1	1	1	0	1	1	1	1	0	1	0	0	0	0
		-0.616641	0	0	1	0	1	1	1	0	0	1	0	1	1	0	0	1	1	1	1		0	0	1	1	0	1	0	0	0	0	1	1	0	0	0	1	0	0	0
		-0.606883	1	0	0	0	1	0	0	1	1	0	0	0	0	1	0	0	1	0	0		0	0	0	0	1	0	1	1	1	0	0	0	0	0	0	0	0	0	0
		-0.597029	1	1	1	1	1	0	1	0	1	0	1	0	0	0	1	0	0	0	0		1	0	1	1	0	1	0	1	1	0	0	1	1	0	0	0	0	0	1
		-0.587081	0	1	0	1	0	0	0	1	1	0	0	0	0	0	0	1	1	0	1		1	0	0	0	1	0	1	0	1	0	0	0	1	1	1	1	1	1	1
		-0.57704	0	1	1	1	0	1	0	1	0	0	0	0	1	0	1	0	1	0	1		0	1	0	1	1	0	0	0	0	1	0	1	0	1	1	0	1	0	0
		-0.566908	1	1	1	0	0	1	1	0	0	1	1	1	1	0	0	1	0	1	0		1	0	1	1	0	0	0	0	0	1	1	0	1	0	1	0	0	1	1
		-0.556686	0	0	0	0	0	1	1	1	0	1	0	0	1	1	0	0	0	0	0		0	1	0	0	0	0	1	1	0	1	0	0	0	0	0	1	0	1	0
		-0.546377	1	1	1	0	1	0	0	0	0	0	1	0	0	0	1	1	0	1	0		1	1	1	0	1	1	1	1	1	0	1	0	0	1	1	1	0	1	0
		-0.535981	1	0	0	1	0	0	0	0	1	1	1	0	0	1	1	0	0	1	0		0	0	0	1	0	1	0	0	0	1	1	1	0	1	0	0	1	0	1
		-0.525501	0	1	0	0	1	0	0	0	1	0	1	1	0	1	0	1	1	0	1		0	0	0	0	0	1	0	0	0	0	0	1	1	0	0	0	1	0	0
		-0.514937	1	0	1	1	1	1	0	1	0	1	0	1	1	0	0	1	1	1	1		0	1	0	0	1	0	1	0	0	0	1	0	0	0	0	1	0	1	0
		-0.504292	0	0	0	0	1	1	0	0	1	1	0	0	0	0	1	0	1	0	1		1	1	1	0	0	1	0	1	1	1	0	0	0	0	0	1	0	1	0
		-0.493568	0	0	1	1	1	0	1	1	0	0	0	1	1	0	1	0	0	0	0		1	0	1	0	1	0	0	1	0	0	1	0	1	0	1	1	1	0	1
		-0.482766	1	0	1	0	0	0	1	0	0	0	0	0	0	1	0	0	0	1	1		0	1	1	1	1	0	0	0	1	1	1	1	0	1	1	0	1	0	0
		-0.471887	0	1	0	0	0	1	0	0	0	0	1	1	0	1	0	0	0	1	0		1	0	0	1	1	0	1	1	0	1	0	1	1	0	0	1	0	0	1
		-0.460934	0	1	0	1	0	0	1	1	1	0	1	0	1	0	1	0	1	0	0		1	1	0	1	0	0	1	0	0	0	0	0	0	1	0	0	0	1	1
		-0.449908	0	0	0	0	0	1	1	1	1	1	0	0	0	0	0	1	1	0	0		0	0	1	1	1	1	1	0	1	0	1	1	1	1	1	0	1	1	0
		-0.438811	1	1	1	1	0	0	0	0	0	0	1	0	1	0	0	1	0	0	0		1	0	0	0	0	1	0	1	0	0	0	0	1	0	1	1	0	0	0
		-0.427645	1	1	1	1	1	1	1	1	1	1	0	1	1	1	0	0	1	1	1		0	0	0	0	0	1	0	0	0	0	0	1	0	0	1	0	0	0	0
		-0.416412	1	1	1	0	1	1	0	1	0	1	0	1	0	0	1	0	0	0	1		0	1	0	0	0	1	0	0	1	0	0	0	1	1	0	1	0	0	1
		-0.405112	0	0	0	0	1	0	1	0	0	0	0	1	0	1	1	1	0	1	1		0	1	1	1	0	0	1	0	1	1	0	1	0	1	0	1	0	1	1
		-0.393749	1	0	0	0	1	0	1	0	1	1	0	0	0	0	1	1	1	0	0		1	0	1	0	1	0	1	0	1	0	1	1	1	0	0	0	1	1	1
		-0.382323	0	0	1	1	0	0	0	0	0	0	1	1	1	0	0	1	0	1	1		0	1	0	1	1	1	1	1	0	1	1	0	0	1	1	0	1	0	0
		-0.370837	1	1	0	1	0	0	0	0	0	0	1	0	1	1	0	0	1	0	0		1	0	1	1	1	1	0	1	0	1	1	1	1	0	1	1	1	1	0
		-0.359293	0	1	0	0	0	0	1	1	0	1	1	0	0	1	0	0	1	1	0		1	0	0	0	0	0	1	0	1	1	0	0	0	1	0	1	1	1	1
		-0.347691	1	0	0	0	0	1	0	0	1	1	1	1	1	1	0	1	0	1	1		0	0	0	1	0	0	0	1	0	0	0	1	0	1	1	0	0	0	1
		-0.336035	1	0	0	0	1	1	0	0	1	0	0	0	0	1	1	1	1	0	0		0	1	1	0	0	0	0	1	0	1	0	1	0	0	0	0	1	0	0
		-0.324326	0	0	1	1	1	0	0	1	0	0	0	0	1	0	1	0	0	0	1		0	0	1	0	1	1	0	0	0	0	1	0	0	0	0	0	0	0	0
		-0.312565	0	1	1	1	0	1	0	1	1	1	0	1	0	0	1	0	0	1	1		1	1	0	0	0	1	1	0	1	0	1	0	0	0	0	0	0	0	1
		-0.300755	0	1	1	1	0	0	1	0	0	0	1	1	1	0	0	0	0	0	0		1	1	0	1	0	0	1	1	1	1	1	0	1	1	1	1	0	1	1
		-0.288898	0	0	0	0	1	0	1	1	1	1	0	0	1	0	1	0	1	0	0		0	1	0	1	0	1	1	1	1	0	0	0	1	1	1	1	1	1	1
		-0.276995	1	1	0	1	1	1	1	0	0	1	1	0	0	1	0	1	0	1	0		0	0	1	0	1	0	0	0	1	1	1	1	1	0	1	1	1	0	0
		-0.265049	1	0	1	0	0	0	1	1	0	0	0	0	0	0	1	1	1	1	0		1	0	1	1	1	0	0	0	0	1	0	1	0	1	1	0	0	1	0
		-0.25306	0	0	1	1	1	1	0	1	1	0	0	1	1	1	0	0	0	0	1		1	0	0	1	1	0	0	0	0	1	0	0	1	0	0	1	1	1	1
		-0.241032	0	0	0	0	0	1	1	0	0	1	1	1	1	0	1	1	1	0	1		1	1	1	0	0	1	0	1	1	0	0	1	0	0	1	0	0	0	1
		-0.228965	1	0	0	0	0	1	0	0	1	0	1	1	0	1	1	0	1	1	1		0	1	1	0	1	1	1	1	1	0	1	0	0	1	0	1	1	0	0
		-0.216862	1	1	1	1	1	0	0	0	1	0	0	0	0	0	0	0	0	0	0		0	1	0	1	1	1	0	0	0	0	1	0	0	0	0	0	1	1	0
		-0.204725	0	1	1	0	1	0	1	1	1	0	1	1	0	0	0	1	0	1	1		0	0	0	1	1	0	1	1	0	1	1	1	1	1	0	1	0	1	1
		-0.192556	0	1	0	0	0	0	0	1	0	1	1	0	1	1	1	0	0	1	0		1	1	1	1	0	0	1	1	1	1	0	0	1	1	1	1	0	1	1
		-0.180356	0	0	0	1	1	0	0	0	0	1	0	0	1	1	0	1	1	0	0		1	0	0	0	0	1	1	0	1	0	1	1	1	1	1	0	0	0	0
		-0.168129	0	0	1	0	0	1	1	1	0	0	0	1	1	1	0	0	1	1	1		1	0	0	1	1	1	0	1	0	0	0	1	1	0	0	0	1	0	0
		-0.155878	0	0	0	1	1	1	1	0	1	0	0	0	0	0	0	1	0	0	0		0	1	1	0	0	0	0	0	1	1	0	1	0	0	1	0	1	0	0
		-0.143612	1	1	0	1	0	0	0	1	1	0	1	1	0	1	1	1	1	0	1		1	0	0	0	0	0	1	1	0	0	1	0	0	1	0	1	1	1	1
		-0.131335	1	1	1	1	0	0	0	0	1	1	1	0	0	0	0	0	0	1	1		0	1	1	1	0	1	0	1	0	1	0	0	1	1	1	1	0	1	1
		-0.119039	1	1	1	0	0	1	1	1	0	1	1	1	1	1	1	1	1	1	0		0	1	1	0	1	0	0	0	1	0	1	1	0	0	0	0	0	0	0
		-0.106678	0	0	0	0	1	1	0	1	1	1	0	0	1	1	1	1	0	0	0		1	0	0	1	1	1	0	0	0	1	1	1	0	0	1	0	0	0	0
		-0.0940535	1	0	1	0	1	1	0	0	1	0	0	0	0	0	1	0	0	1	0		1	0	0	0	1	1	1	0	1	1	0	0	1	1	0	1	1	1	1
		-0.0805674	1	1	0	1	0	0	1	0	0	0	1	1	1	1	0	0	1	1	1		0	1	0	0	0	0	1	1	0	1	0	1	1	0	1	1	0	0	1
		-0.0647327	0	1	0	1	1	0	0	0	0	1	0	1	0	0	0	0	1	0	1		0	0	1	0	0	0	1	1	1	0	1	1	1	1	1	0	1	0	0
		-0.0433343	1	1	1	1	0	1	1	1	0	0	1	1	0	0	0	1	1	0	1		0	1	1	0	0	1	1	1	0	0	1	0	0	0	0	0	0	1	1
		-0.0103949	0	0	1	1	1	1	1	1	1	1	0	0	1	1	1	1	1	1	1		0	0	1	1	1	0	0	0	1	0	1	1	0	0	0	1	1	0	0
		0.0436266	1	0	0	0	1	1	1	0	1	1	1	0	0	1	1	1	1	0	0		1	1	0	1	1	1	1	0	1	1	0	0	1	0	1	1	1	0	1
		0.131494	1	0	1	1	1	0	1	1	1	0	1	1	1	0	1	1	0	1	1		1	0	1	1	1	0	0	1	1	1	0	1	1	1	0	0	0	1	1
		0.26609	1	1	1	1	0	1	0	1	1	1	1	1	1	1	1	0	0	1	1		1	1	0	0	0	1	1	1	0	0	1	0	0	1	0	1	1	0	0
		0.452135	1	1	1	1	1	1	1	1	0	1	1	1	1	1	0	1	1	1	1		0	1	1	1	1	1	0	0	0	1	0	0	0	1	1	0	0	1	0
		0.672075	0	1	1	0	1	1	1	1	1	1	0	1	1	1	1	1	1	1	1		1	0	0	1	1	1	1	0	0	1	1	0	1	0	1	1	1	1	0
		0.874718	1	0	0	1	1	1	1	0	1	1	1	0	0	1	1	1	0	0	0		1	1	1	1	1	0	0	0	1	1	1	1	1	1	0	1	1	1	1
		0.98706	1	1	1	1	0	0	0	1	1	0	1	1	1	0	1	0	1	1	1		1	1	1	1	0	0	1	1	1	0	0	1	1	1	1	1	0	1	1
		0.95817	0	1	1	0	1	1	1	1	0	1	0	0	1	0	0	1	0	1	1		1	1	1	0	1	1	1	1	1	1	0	0	0	1	0	1	1	0	0
		0.799821	0	1	0	0	0	0	0	0	0	0	0	0	0	1	0	0	0	0	0		0	0	1	1	1	1	0	1	1	1	1	1	0	1	1	0	1	1	0
		0.576888	0	0	0	0	0	0	0	0	0	0	0	0	0	0	0	0	0	0	0		1	1	1	1	1	1	0	0	0	1	1	0	1	0	0	1	1	1	1
		0.359102	0	0	0	0	0	0	0	0	0	0	0	1	0	0	0	0	0	0	0		1	1	0	1	0	0	1	1	1	1	0	1	1	1	1	1	0	1	1
		0.186143	0	0	0	0	0	0	0	0	0	0	0	0	0	0	0	0	0	0	0		0	1	1	0	1	1	1	1	1	0	1	1	1	1	1	1	0	0	1
		0.0660726	1	0	0	0	0	0	0	0	0	0	1	1	0	1	0	0	0	0	0		0	1	1	1	0	1	0	0	0	1	1	1	1	0	0	0	1	1	0
		-0.0102804	0	0	0	0	0	0	0	0	1	0	0	0	1	0	0	1	0	0	0		1	0	0	0	0	1	1	1	1	1	0	0	0	0	0	1	1	1	1
		-0.0566975	1	1	0	1	0	0	1	0	0	0	1	0	0	0	0	1	1	0	0		0	1	0	0	0	0	0	0	0	0	0	0	0	0	0	0	0	0	0
		-0.0852626	0	0	1	1	1	0	1	1	0	0	0	0	1	0	1	0	0	1	0		0	0	1	0	1	0	0	0	0	0	0	0	1	1	0	0	0	0	0
		-0.104441	0	0	1	1	0	1	0	1	0	1	0	0	1	0	1	0	1	1	1		0	0	0	0	0	0	0	0	0	0	0	0	0	0	0	0	0	0	1
		-0.119273	1	0	1	0	1	1	1	1	0	1	0	1	0	1	0	0	1	0	1		1	0	0	1	0	0	0	0	0	0	0	0	0	0	1	0	1	0	0
		-0.132344	0	1	0	0	1	1	1	1	1	1	0	1	0	1	1	1	1	1	1		0	0	0	1	1	0	0	1	0	0	1	0	0	0	0	1	0	0	0
		-0.144795	1	0	0	0	0	1	0	0	1	0	1	0	0	1	1	0	0	0	0		1	1	0	0	0	0	0	1	1	0	0	1	0	1	1	0	0	1	0
		-0.157067	1	1	0	0	0	0	0	0	1	0	0	1	1	0	0	0	0	1	0		0	0	0	0	0	1	1	1	1	0	0	1	0	1	0	0	0	0	1
		-0.169292	0	1	0	0	1	0	0	0	0	1	1	0	0	1	0	0	1	0	0		1	0	1	0	0	1	1	0	0	1	1	0	0	0	0	0	1	1	0
		-0.181495	0	1	0	1	0	0	0	0	0	0	1	1	0	0	0	1	0	0	1		0	0	1	0	0	1	0	0	0	1	1	1	1	1	1	1	0	0	1
		-0.193682	0	0	1	1	0	1	1	0	1	0	0	0	0	0	0	1	0	0	1		0	1	0	1	1	0	1	0	0	1	0	0	1	0	0	1	0	0	0
		-0.205846	0	0	0	0	1	0	1	0	0	0	1	0	0	0	1	0	0	0	0		0	0	1	0	0	1	1	0	1	0	0	1	1	0	1	0	0	1	1
		-0.21798	1	0	1	1	1	0	1	1	1	0	0	0	1	0	1	1	0	1	1		1	0	0	1	1	0	0	1	1	0	1	0	0	0	1	0	0	0	1
		-0.230079	0	1	1	1	0	0	0	1	0	1	1	0	1	1	0	0	1	1	0		0	1	0	0	1	0	0	0	0	0	1	1	0	0	0	0	1	1	0
		-0.242142	1	1	1	0	1	1	0	1	1	1	0	1	1	1	1	0	1	1	0		1	0	0	0	1	1	0	1	0	1	0	0	1	0	0	0	0	1	0
		-0.254167	0	0	0	0	1	1	0	0	0	0	1	1	0	0	0	0	1	0	0		1	1	0	1	0	0	0	0	1	1	0	0	1	1	1	0	0	1	1
		-0.266152	1	0	0	0	0	0	0	0	0	0	0	0	0	0	0	1	0	0	0		0	0	1	0	0	0	1	1	1	0	1	1	0	1	0	1	1	0	0
		-0.278095	1	0	0	0	0	0	1	0	0	1	0	1	1	0	0	0	0	0	0		0	1	1	0	0	1	0	0	1	1	1	1	0	1	0	0	1	0	0
		-0.289994	0	1	1	1	0	0	0	1	0	0	0	0	0	0	0	1	1	1	1		1	0	0	0	0	1	1	0	0	1	0	0	1	0	1	1	0	0	1
		-0.301847	0	0	1	1	0	0	0	1	0	0	0	1	1	1	0	0	0	0	1		0	1	0	1	1	0	0	0	1	0	0	0	0	0	0	1	0	0	1
		-0.313652	0	0	0	0	1	1	1	0	1	0	0	0	0	1	1	1	0	0	0		0	0	1	1	0	0	0	1	0	0	1	0	0	1	1	1	0	1	0
		-0.325408	0	0	0	1	1	1	1	1	1	0	0	0	0	0	1	0	0	0	0		1	1	1	0	1	0	1	1	0	0	0	1	0	1	1	1	1	0	0
		-0.337112	0	1	0	0	0	0	0	0	1	1	1	0	0	1	0	0	0	0	1		0	0	0	1	1	0	0	0	0	1	0	0	0	0	0	0	1	1	0
		-0.348763	1	0	1	1	0	1	0	0	0	1	1	0	0	0	0	0	0	0	1		1	0	0	1	0	1	1	0	0	1	0	0	1	1	0	0	1	0	0
		-0.36036	0	1	1	1	1	0	1	0	0	1	0	1	1	0	0	0	1	1	0		1	0	1	0	0	0	0	1	1	0	0	1	0	0	0	0	0	0	1
		-0.371899	1	0	1	0	0	1	1	0	0	1	0	1	1	0	1	1	0	1	0		0	1	0	1	1	1	0	1	1	0	0	1	1	0	0	0	0	1	1
		-0.383379	1	1	0	1	0	0	0	0	1	0	0	0	0	0	1	1	1	0	0		0	1	1	0	1	0	1	1	0	0	1	1	0	0	1	0	1	0	0
		-0.394799	0	0	0	0	0	0	0	1	0	0	1	1	1	0	1	0	0	1	1		0	0	0	1	0	1	0	0	1	0	1	0	1	1	1	1	1	1	1
		-0.406157	0	0	0	0	0	0	0	1	1	0	1	0	0	1	0	1	1	1	0		0	0	0	0	0	0	1	0	0	1	1	0	1	1	0	1	1	0	1
		-0.41745	0	0	0	0	1	0	0	1	0	0	0	1	0	1	0	0	1	1	0		1	0	0	0	0	0	1	0	0	0	0	0	0	0	0	1	0	1	0
		-0.428678	0	0	0	0	1	0	1	0	0	0	1	0	0	1	0	1	0	0	0		1	1	1	0	1	0	1	1	1	1	0	0	0	0	1	0	1	0	0
		-0.439838	1	1	1	0	1	1	1	0	1	1	0	1	0	0	0	0	0	1	1		0	0	1	1	0	1	0	0	0	0	1	1	0	0	1	0	0	1	1
		-0.450928	1	1	1	0	0	0	0	0	0	1	0	0	1	1	0	0	1	0	0		1	1	0	0	1	1	0	0	1	0	1	0	1	1	0	0	0	1	1
		-0.461947	1	1	0	0	0	1	0	1	0	0	1	0	1	0	1	0	0	0	1		1	0	1	0	0	0	0	1	0	1	0	1	1	1	1	0	0	0	0
		-0.472894	0	0	0	1	0	1	0	0	1	1	0	0	0	0	1	0	1	0	1		0	1	0	0	1	1	0	0	0	0	1	1	1	0	0	1	0	0	0
		-0.483765	0	0	0	0	0	1	0	0	0	1	0	0	0	0	1	1	0	0	0		0	1	1	0	0	1	1	0	0	1	0	0	0	0	0	0	0	0	0
		-0.49456	0	0	0	1	0	0	1	0	0	0	0	0	1	0	0	0	0	0	0		0	0	0	1	0	0	0	0	1	1	0	0	0	0	1	1	1	0	1
		-0.505278	1	1	1	0	0	0	0	0	1	0	1	0	0	0	0	1	0	0	0		1	0	0	1	0	0	1	1	1	1	1	0	0	0	0	0	1	1	1
		-0.515915	0	0	1	1	1	0	1	1	0	0	1	0	0	1	1	1	0	1	1		1	0	0	1	1	0	1	1	1	0	0	0	0	1	1	1	0	1	0
		-0.526471	0	1	0	1	1	0	0	1	1	1	0	1	0	1	0	0	0	1	0		0	1	0	0	1	0	0	0	0	0	1	1	0	1	0	0	1	0	0
		-0.536943	1	0	0	0	1	0	0	0	1	0	1	1	0	1	1	0	0	0	0		0	0	1	0	1	0	0	0	0	0	1	1	0	0	0	0	0	1	0
		-0.547331	1	0	0	1	0	0	1	1	0	1	0	0	0	0	0	0	0	1	1		0	1	1	0	0	1	1	0	0	0	0	0	1	1	0	0	0	0	0
		-0.557633	0	1	1	0	0	1	0	1	0	1	0	1	1	0	0	0	1	0	0		0	0	0	0	0	0	0	1	1	1	0	1	1	0	0	1	0	0	0
		-0.567846	0	1	1	0	0	1	1	0	0	0	0	0	1	0	1	0	1	1	0		1	0	1	1	0	1	0	1	1	0	0	0	1	1	1	1	0	1	1
		-0.57797	0	0	1	0	0	1	0	0	0	0	0	0	1	1	1	1	1	0	1		0	0	1	0	0	1	1	0	0	1	0	0	0	0	1	0	1	0	0
		-0.588002	0	0	0	1	0	0	0	0	0	0	1	0	0	1	0	1	0	0	0		1	0	0	1	1	0	0	0	0	0	0	0	0	0	0	0	1	1	1
		-0.597942	0	0	0	1	1	0	0	0	1	0	1	1	0	0	0	1	0	0	1		1	1	0	1	1	1	1	1	0	1	1	0	0	0	0	1	1	1	0
		-0.607787	1	0	0	0	0	0	0	0	1	1	1	1	1	1	0	0	1	0	0		0	1	0	0	0	0	1	1	1	0	0	1	1	1	0	0	0	0	1
		-0.617536	1	0	1	0	1	1	1	1	0	0	0	0	0	0	0	0	1	0	0		1	1	0	0	0	1	0	0	1	0	1	1	1	1	1	0	0	0	1
		-0.627188	0	1	0	0	1	1	1	1	1	0	0	0	0	0	0	0	1	1	0		0	0	0	0	0	0	0	0	0	0	1	1	0	0	1	0	0	0	0
		-0.636741	1	0	1	0	1	0	0	0	0	0	0	0	0	0	1	1	0	0	0		0	1	1	1	0	0	0	0	1	1	0	0	1	0	0	1	0	1	0
		-0.646193	0	1	0	1	0	0	0	1	0	0	0	1	0	0	1	1	0	1	1		1	0	0	1	1	0	0	1	1	1	0	0	0	0	1	1	0	1	1
		-0.655543	0	1	0	1	0	0	0	0	0	1	0	0	1	0	0	0	0	1	1		0	0	1	0	0	0	0	1	0	0	0	1	0	1	1	1	0	0	0
		-0.66479	0	0	1	0	0	1	1	0	1	0	0	1	1	0	0	0	0	0	0		0	0	1	0	1	0	1	0	0	0	1	1	0	1	0	0	1	0	0
		-0.673931	0	1	0	0	0	0	1	1	1	0	0	1	0	1	0	0	1	0	0		0	0	1	0	1	1	0	0	0	0	1	0	0	0	0	1	1	0	0
		-0.682966	0	0	1	0	1	0	0	0	0	0	1	0	0	0	0	0	0	1	0		0	1	0	0	0	1	1	0	0	1	0	0	1	0	0	0	1	0	0
		-0.691894	1	0	0	0	0	0	0	1	0	1	1	0	0	1	1	0	1	0	1		1	1	0	1	0	0	1	1	1	0	0	0	1	0	1	0	0	0	1
		-0.700712	1	0	0	1	1	0	1	1	0	1	1	0	1	1	0	1	0	0	1		1	1	0	1	0	1	1	1	1	1	0	0	1	1	1	0	0	0	0
		-0.709419	1	0	0	0	0	1	0	0	0	1	0	0	1	0	1	1	0	0	0		0	0	0	0	1	0	0	0	0	0	0	1	0	1	0	0	0	1	1
		-0.718015	0	0	0	1	0	1	0	0	0	0	0	0	1	0	1	0	0	1	0		0	0	0	1	1	0	0	0	0	0	0	0	1	0	0	0	1	1	1
		-0.726497	1	0	1	0	0	1	1	0	0	0	0	0	0	1	0	0	0	0	0		1	0	1	0	0	0	0	1	0	1	0	0	0	0	0	1	1	1	0
		-0.734864	0	0	1	1	0	0	0	0	1	0	1	1	0	0	0	1	1	1	0		1	1	1	0	0	1	0	0	0	1	1	1	0	0	0	1	0	0	0
		-0.743115	1	1	0	0	0	0	0	1	0	0	0	1	0	1	0	0	1	1	1		0	0	0	0	1	1	1	1	0	0	1	1	0	1	1	0	1	0	1
		-0.751249	0	1	0	0	1	1	0	1	1	1	1	1	0	0	0	1	0	0	1		0	1	0	1	1	0	0	0	0	0	1	1	0	0	1	0	0	0	0
		-0.759264	0	1	0	0	1	0	1	0	1	0	0	1	1	0	1	0	0	0	1		0	0	0	1	0	1	1	0	1	0	0	0	1	1	0	1	0	1	1
		-0.76716	0	0	1	0	1	0	0	0	1	1	1	0	0	0	1	1	0	0	0		1	0	1	0	0	0	0	0	1	0	0	0	1	0	0	0	0	1	1
		-0.774934	0	1	1	1	0	0	1	0	0	0	0	0	1	1	0	0	1	0	0		1	0	0	0	0	1	0	0	1	1	1	0	0	0	0	1	1	0	0
		-0.782586	0	0	0	1	0	0	0	0	0	1	0	0	0	0	0	1	0	1	0		0	1	0	0	0	0	1	0	0	1	0	0	0	0	1	0	0	0	0
		-0.790114	0	1	0	0	1	1	0	0	1	1	0	0	1	0	0	0	1	1	1		0	0	0	1	0	0	0	0	0	0	0	0	0	0	0	1	0	1	0
		-0.797517	0	0	0	0	0	1	0	0	1	0	0	0	0	0	1	0	0	0	0		0	1	0	1	0	0	1	1	1	0	0	0	1	1	1	0	1	1	1
		-0.804795	1	0	0	1	0	0	0	0	0	0	0	1	0	0	1	0	0	1	0		1	0	1	0	1	0	0	1	1	0	0	1	0	1	0	0	0	0	1
		-0.811945	1	0	1	1	0	0	0	1	0	0	1	1	0	0	0	0	0	1	0		1	0	1	0	1	1	0	1	0	1	1	1	0	1	0	0	1	0	0
		-0.818968	1	1	1	0	0	0	1	1	0	1	1	1	0	1	0	0	0	0	1		0	0	1	0	1	1	0	0	0	1	1	0	1	0	0	0	0	0	0
		-0.825861	0	1	0	0	1	0	1	1	0	0	1	0	0	1	0	1	0	0	0		1	1	0	0	0	1	1	0	0	0	0	0	0	0	0	1	0	1	0
		-0.832623	0	0	0	0	1	1	1	0	0	0	0	0	0	1	1	0	1	0	0		0	1	0	1	0	0	1	0	0	1	0	0	0	0	1	0	0	1	1
		-0.839254	1	0	0	0	1	0	1	1	0	0	1	0	0	0	1	1	0	0	1		0	1	1	1	0	0	0	0	0	0	0	1	1	0	1	0	0	0	1
		-0.845753	1	0	1	1	0	1	0	0	0	0	0	0	1	1	0	0	1	0	1		0	0	0	0	1	0	0	0	0	1	0	0	0	0	0	0	1	0	0
		-0.852118	0	1	1	1	0	1	0	0	1	1	0	0	1	0	0	0	1	0	0		0	0	0	0	1	0	0	0	1	0	1	0	1	0	0	1	1	0	0
		-0.858348	0	0	0	0	0	0	0	0	1	1	0	0	1	0	0	0	0	0	0		0	0	0	0	1	0	1	1	1	0	1	1	0	1	0	1	0	0	0
		-0.864443	0	0	0	0	1	0	0	0	0	1	0	1	0	0	0	1	0	1	0		0	0	0	1	0	1	0	1	1	0	0	1	0	1	1	1	1	0	0
		-0.870401	0	0	0	0	1	0	0	1	0	0	1	0	1	0	0	1	0	1	0		0	1	1	0	0	1	0	0	0	0	1	0	0	1	0	0	0	0	1
		-0.876222	0	0	1	1	0	0	0	0	0	1	1	0	0	1	1	0	1	1	0		0	0	1	1	0	0	0	0	0	0	1	0	0	0	0	0	0	1	0
		-0.881905	1	1	0	1	0	1	0	1	1	0	0	1	0	1	0	0	1	0	0		1	0	0	0	0	0	1	1	1	1	0	0	1	0	1	0	1	1	1
		-0.887448	0	1	0	0	0	1	1	0	0	0	0	1	0	1	1	0	0	0	1		1	1	0	0	0	0	1	1	0	1	0	1	1	0	0	0	0	1	1
		-0.892851	1	1	0	0	0	0	1	0	1	0	0	0	0	0	1	1	0	0	0		1	1	0	0	1	0	1	0	0	0	1	0	1	0	1	1	1	0	1
		-0.898113	1	0	1	0	0	0	1	0	0	0	1	1	1	0	0	1	0	0	1		0	0	1	1	1	1	0	0	0	1	1	1	0	1	0	1	0	0	0
		-0.903234	0	0	1	0	1	1	0	0	0	0	0	0	1	0	0	0	0	1	1		0	0	1	1	0	1	0	0	0	1	0	0	0	0	0	0	0	0	0
		-0.908211	0	0	1	0	0	0	1	1	1	0	0	0	0	0	0	1	0	1	0		1	0	0	0	0	0	0	0	1	0	0	1	0	1	0	1	1	0	0
		-0.913046	0	0	0	0	0	0	1	1	1	1	0	1	0	0	1	0	1	0	0		1	0	0	0	0	0	1	1	1	0	0	0	0	1	1	0	0	0	1
		-0.917736	0	0	0	1	1	0	0	0	0	0	0	0	0	1	1	0	1	0	0		0	1	0	0	1	0	1	1	0	0	0	0	1	1	1	0	1	1	0
		-0.922281	1	0	0	1	0	0	0	0	0	1	0	1	1	0	1	0	0	0	1		0	0	0	1	0	1	0	0	0	0	0	0	0	0	0	0	0	0	0
		-0.92668	1	1	0	1	1	0	0	1	0	0	1	0	0	1	0	0	1	0	1		0	1	1	1	1	1	0	0	0	0	1	0	1	0	0	0	0	1	0
		-0.930934	0	1	1	0	0	1	1	1	0	0	1	0	0	1	0	0	0	0	0		0	0	0	0	0	0	0	0	1	1	0	1	0	0	1	1	0	0	1
		-0.93504	1	0	0	0	0	1	0	0	1	1	0	0	0	0	0	1	0	1	0		1	0	1	0	0	1	0	0	0	0	1	1	1	1	0	1	0	1	1
		-0.938998	0	1	1	1	0	1	0	0	1	0	1	0	0	0	0	1	0	0	0		0	0	1	0	0	0	1	1	0	1	0	0	0	0	0	0	1	0	0
		-0.942809	0	0	0	0	0	0	0	0	1	1	0	1	1	0	1	0	0	1	0		1	0	0	0	1	0	0	0	1	1	0	0	1	1	1	0	1	1	0
		-0.94647	0	0	0	0	1	0	0	0	0	1	0	0	1	0	0	1	1	1	1		1	1	0	1	1	1	1	1	0	0	1	1	0	0	0	0	0	0	0
		-0.949982	0	0	0	1	1	0	0	0	0	0	1	0	1	1	0	0	1	1	1		0	1	0	1	0	0	1	1	0	1	0	0	0	1	0	1	0	0	0
		-0.953344	0	0	0	0	0	0	1	0	0	0	0	1	1	1	1	0	1	0	0		0	1	0	0	0	0	0	1	0	0	1	0	0	0	0	1	0	0	1
		-0.956555	1	0	1	0	0	0	1	1	0	0	1	0	0	0	1	0	0	0	0		0	0	1	0	1	0	0	0	0	1	0	1	0	0	1	0	0	0	0
		-0.959616	1	1	1	0	0	0	0	0	0	0	0	1	0	0	0	0	0	0	1		0	0	1	1	0	1	0	0	1	0	0	0	1	0	0	0	1	1	1
		-0.962524	1	1	1	0	1	1	1	0	0	1	0	0	0	1	0	1	0	0	1		1	0	0	1	0	0	1	0	1	0	0	1	1	0	1	0	1	1	0
		-0.965281	0	1	0	0	1	1	0	1	1	0	1	0	0	0	0	1	0	0	0		1	1	0	0	0	0	0	0	1	0	1	0	0	1	0	1	0	0	1
		-0.967885	0	0	0	1	0	1	0	0	1	0	0	0	0	0	0	1	1	0	0		0	1	1	0	1	0	0	0	0	0	1	0	0	0	0	0	1	0	0
		-0.970337	0	0	0	0	0	0	1	1	1	0	0	0	0	0	0	0	0	1	1		1	0	1	0	1	0	0	0	1	1	0	1	1	1	1	1	0	1	0
		-0.972635	1	0	0	1	0	0	0	0	0	1	0	1	1	1	1	0	1	1	0		0	0	1	1	1	1	0	1	1	0	1	0	1	0	0	0	0	1	1
		-0.97478	0	1	1	1	1	0	1	0	0	0	1	1	1	1	0	0	1	0	0		0	0	0	1	0	0	1	1	0	0	0	1	0	0	0	0	0	0	0
		-0.976771	0	1	1	0	0	1	0	0	0	0	0	1	0	0	1	1	0	1	0		0	1	0	0	0	1	1	1	0	1	1	0	0	0	1	1	1	0	0
		-0.978607	0	0	0	0	1	1	0	0	0	0	0	0	0	0	1	1	0	0	0		0	0	0	1	0	1	0	0	0	0	0	0	0	0	1	0	1	0	0
		-0.980289	0	0	0	0	0	0	1	0	0	0	1	0	0	0	0	0	0	0	0		0	1	0	0	0	0	0	0	1	1	0	0	0	1	0	0	0	0	0
		-0.981816	1	0	0	0	0	0	0	0	0	1	1	0	1	0	0	0	0	0	1		0	1	0	0	0	0	0	1	0	1	0	0	1	1	0	0	0	1	1
		-0.983189	1	0	0	1	0	0	1	1	1	1	1	1	1	0	0	0	0	0	1		1	0	1	0	0	0	1	0	0	0	1	1	1	0	1	1	0	0	1
		-0.984406	0	1	1	0	0	0	0	1	1	1	0	0	1	1	0	0	0	1	1		0	0	1	0	1	1	1	0	1	0	0	1	0	0	0	0	0	1	0
		-0.985467	0	1	0	0	1	1	0	0	1	0	0	0	0	1	0	0	1	0	0		1	0	0	1	1	1	0	0	0	0	0	1	0	1	0	1	1	1	1
		-0.986373	0	0	1	1	1	0	0	1	0	0	0	0	0	1	1	0	0	1	0		1	0	0	1	0	0	0	1	1	0	1	0	0	1	0	0	1	0	0
		-0.987123	0	1	1	0	0	1	0	1	0	1	0	1	0	0	1	0	1	1	0		0	1	0	0	0	0	0	0	0	0	0	0	1	0	0	0	0	0	0
		-0.987717	1	0	0	0	1	0	1	0	0	0	0	0	0	0	0	0	1	1	0		0	1	0	0	1	0	1	0	0	1	1	1	0	0	1	1	0	0	0
		-0.988155	0	1	0	0	0	1	1	0	0	1	0	0	0	0	0	1	1	0	1		0	0	1	0	1	0	1	1	0	1	0	0	0	0	1	0	0	0	0
		-0.988438	1	0	0	1	0	1	0	0	1	0	0	0	0	1	1	1	0	0	0		1	1	0	1	0	1	0	0	0	0	0	0	1	0	0	0	1	1	0
		-0.988564	1	0	0	0	1	0	1	0	1	0	0	0	0	1	0	1	0	0	1		1	0	0	1	0	0	1	1	1	0	0	0	1	1	0	1	0	1	1
		-0.988534	0	0	0	1	0	0	0	0	0	0	1	1	0	0	0	0	0	1	1		1	0	1	0	0	1	0	0	1	0	0	1	0	1	1	1	0	0	1
		-0.988347	1	0	1	1	0	0	1	1	1	0	1	1	1	1	0	1	1	1	0		0	0	1	0	1	1	0	1	0	1	1	1	0	0	1	0	1	0	0
		-0.988005	0	0	1	1	0	0	0	1	0	0	1	1	1	0	0	0	1	0	0		0	0	0	0	1	0	0	0	0	1	1	0	0	0	0	0	1	0	1
		-0.987507	1	0	0	0	0	0	0	0	0	0	0	0	1	0	1	1	0	0	0		0	1	0	1	0	0	0	0	1	0	1	0	0	0	0	0	0	1	0
		-0.986853	0	1	1	0	1	0	0	1	0	1	1	0	0	0	1	0	0	0	0		0	1	0	1	0	0	1	0	0	1	0	0	0	0	0	1	1	1	0
		-0.986043	0	1	1	0	0	0	0	0	1	1	0	0	1	0	1	0	0	0	0		0	0	0	0	1	0	1	0	0	0	0	0	1	1	1	0	0	0	1
		-0.985077	0	1	0	0	1	1	0	0	0	0	1	0	1	0	0	0	0	1	1		1	0	0	0	1	0	0	0	0	0	1	0	0	0	1	0	0	1	0
		-0.983956	0	0	0	1	0	1	0	0	0	0	0	0	0	0	1	1	1	0	1		1	1	1	0	0	0	0	1	1	1	1	0	1	1	0	0	1	0	1
		-0.982679	0	0	0	0	1	1	1	0	0	0	0	0	0	1	0	1	0	1	0		1	0	0	0	0	1	1	1	1	1	0	1	1	1	0	1	0	0	1
		-0.981248	1	0	1	1	0	0	1	1	0	1	0	1	0	0	1	0	1	0	0		0	0	1	0	0	0	1	0	1	0	0	1	0	0	0	1	0	0	0
		-0.979661	1	0	0	0	0	0	0	1	0	1	0	1	0	1	0	0	0	0	1		0	0	1	1	0	1	0	0	1	0	0	0	0	0	0	1	0	0	0
		-0.97792	0	0	0	0	0	1	1	1	1	0	1	1	0	0	0	0	0	0	1		0	0	1	1	1	1	0	0	0	0	1	0	1	0	1	0	1	0	0
		-0.976024	1	1	1	0	1	1	0	0	1	0	0	0	1	1	0	0	1	0	0		0	1	0	0	0	1	0	0	0	1	1	0	0	1	0	0	1	0	0
		-0.973974	0	0	0	0	1	0	0	0	1	0	1	0	0	0	1	1	0	1	0		0	0	0	0	0	0	0	1	0	1	0	1	0	1	1	0	0	1	1
		-0.97177	0	1	1	1	1	0	1	0	1	1	0	0	1	0	0	1	1	1	0		1	1	0	1	1	0	1	1	1	0	0	1	0	1	1	1	1	0	1
		-0.969413	0	1	1	1	0	0	0	1	0	1	0	1	1	1	0	0	1	0	0		0	0	1	0	1	0	1	1	1	0	0	0	0	0	0	0	0	1	0
		-0.966902	0	0	0	1	0	1	1	1	0	1	1	1	0	0	0	0	0	1	1		1	1	0	1	0	1	0	0	0	0	1	0	1	0	0	0	0	1	1
		-0.964239	1	0	0	0	0	0	0	0	0	0	0	1	0	0	1	1	0	0	1		1	0	1	0	0	1	1	1	0	0	0	1	1	0	0	0	0	1	0
		-0.961424	1	0	0	0	1	1	0	0	0	0	1	0	0	1	1	1	0	0	0		0	0	0	0	0	0	0	1	0	1	1	0	0	1	0	1	0	1	1
		-0.958457	0	0	0	0	0	0	0	0	0	0	1	1	0	0	0	0	1	1	1		0	1	0	0	1	1	0	0	1	0	0	1	0	0	1	1	1	0	0
		-0.955338	1	1	1	1	0	1	1	0	1	0	0	0	1	0	0	0	0	1	0		0	0	1	0	1	0	0	0	0	1	0	1	0	0	1	0	1	0	1
		-0.952069	1	1	1	1	0	1	0	0	1	0	0	0	1	1	0	0	0	1	0		1	1	0	1	0	0	1	0	0	1	0	0	1	0	0	0	1	0	0
		-0.94865	0	1	0	0	1	0	0	0	0	1	0	0	1	1	0	1	0	0	0		1	0	1	1	0	0	1	0	0	0	0	1	1	1	0	0	0	0	0
		-0.94508	0	0	0	0	1	0	1	1	0	0	0	0	0	0	1	0	0	0	0		0	0	1	1	0	0	0	1	0	0	0	0	1	1	1	1	0	1	0
		-0.941361	0	0	0	0	0	0	0	1	0	1	0	1	0	0	1	0	1	0	1		1	1	0	0	1	1	0	1	1	1	0	0	0	0	0	1	0	0	0
		-0.937494	1	0	0	1	0	0	1	1	0	1	1	1	0	0	0	1	1	0	0		0	0	0	0	1	1	0	0	0	0	1	0	0	1	0	0	1	1	1
		-0.933479	0	1	0	1	0	0	1	0	1	0	1	0	0	1	1	1	1	0	1		0	1	0	1	0	1	0	1	1	1	1	0	1	1	0	1	1	1	1
		-0.929316	1	1	0	0	0	0	0	1	1	0	0	0	1	1	0	1	0	0	1		0	1	0	1	0	0	1	0	1	0	0	1	1	0	1	1	0	0	0
		-0.925006	0	0	1	0	0	0	0	0	1	1	1	0	0	0	0	0	0	0	0		0	0	1	0	0	0	1	0	0	1	1	1	0	0	1	0	0	0	0
		-0.920551	0	0	1	0	0	1	0	0	0	0	0	0	1	0	0	0	1	0	0		1	0	1	0	1	0	0	0	0	0	1	0	0	1	1	0	0	0	0
		-0.91595	0	0	1	1	1	1	1	0	0	0	0	1	0	0	0	0	0	1	0		0	0	1	0	1	0	1	0	0	0	0	0	0	0	0	0	1	0	0
		-0.911204	0	1	1	0	1	1	0	0	0	1	0	1	0	0	1	0	0	1	0		1	0	0	0	0	1	0	1	1	1	0	0	0	0	1	0	0	1	1
		-0.906315	1	0	0	0	1	0	0	0	0	0	0	0	1	1	1	1	0	1	1		1	1	0	1	0	0	1	1	1	0	0	0	0	0	0	1	1	1	1
		-0.901282	1	1	0	1	1	0	1	1	1	1	1	0	0	1	0	0	1	0	0		0	0	0	0	0	1	0	1	0	0	1	1	0	0	0	0	0	0	0
		-0.896107	1	0	0	0	0	0	0	1	0	0	1	0	1	0	0	1	0	1	1		0	1	0	1	1	1	0	0	1	0	1	1	1	1	0	1	1	1	1
		-0.890791	0	0	1	1	0	0	0	1	1	0	1	0	1	0	0	0	0	0	0		1	1	0	0	1	0	0	0	0	1	0	0	1	0	0	1	0	0	0
		-0.885333	0	0	0	0	0	1	0	0	1	0	0	1	1	1	1	0	1	0	1		0	0	1	1	0	0	0	0	0	0	0	1	1	1	1	0	0	1	0
		-0.879737	0	0	0	0	1	1	1	0	0	0	0	0	0	1	1	0	1	0	1		0	0	1	0	0	1	1	0	0	1	1	0	0	1	1	0	0	0	1
		-0.874001	0	1	1	0	1	0	1	0	0	1	0	0	0	0	1	0	0	1	0		0	0	0	1	1	0	1	1	0	0	1	1	1	0	1	0	0	1	0
		-0.868127	1	1	1	1	0	0	0	1	0	1	1	1	0	0	0	0	1	1	1		0	1	0	1	1	0	0	0	0	1	0	0	0	0	0	1	1	0	1
		-0.862116	1	1	0	1	0	1	1	1	0	1	1	1	0	1	0	0	0	0	0		1	1	0	0	0	0	1	1	1	1	0	0	0	0	0	1	0	0	0
		-0.855969	0	0	1	1	0	1	1	0	1	0	0	0	1	0	0	1	0	0	0		1	0	1	0	0	1	1	1	1	0	1	0	0	0	0	0	1	0	0
		-0.849687	0	0	0	0	1	0	0	0	1	0	1	1	1	0	0	1	0	0	0		0	0	1	0	0	1	0	0	1	0	0	0	0	0	0	0	1	0	0
		-0.84327	0	0	0	0	1	0	0	1	0	0	0	0	0	0	0	1	0	1	1		0	0	1	0	1	0	0	0	0	0	1	0	1	1	0	0	1	0	0
		-0.836721	0	0	0	0	0	0	0	0	0	1	0	1	0	0	1	0	1	1	0		1	1	0	1	1	0	0	1	0	1	0	1	1	0	1	0	0	0	1
		-0.830039	1	1	0	0	0	1	1	0	1	1	0	0	0	1	0	1	1	0	1		1	1	0	1	0	0	0	0	0	0	0	1	1	1	1	0	0	1	1
		-0.823226	0	1	0	1	0	1	1	0	0	0	0	0	1	1	1	0	1	0	0		0	0	0	0	1	0	1	0	1	1	0	1	0	1	0	1	0	0	0
		-0.816283	1	0	0	0	1	0	0	0	1	0	1	0	1	0	1	0	0	0	0		0	0	1	0	0	1	0	1	0	0	1	0	0	0	1	0	1	1	1
		-0.809212	1	0	1	0	1	0	0	1	1	1	1	1	0	1	0	0	0	0	0		0	0	0	1	0	1	1	0	1	0	1	0	0	1	0	1	0	1	0
		-0.802012	0	1	1	1	0	0	0	0	0	0	0	1	0	0	1	1	0	0	0		1	0	1	1	0	1	0	1	1	0	0	1	0	1	1	1	0	1	0
		-0.794686	0	0	1	1	0	0	0	1	1	1	1	0	0	1	0	1	0	1	1		1	1	0	0	0	0	0	0	0	0	0	1	1	0	0	1	1	0	1
		-0.787234	0	1	0	0	0	1	0	0	0	0	0	0	1	0	1	0	1	0	1		0	1	0	0	1	0	1	1	0	1	0	0	0	0	0	0	1	1	0
		-0.779658	1	1	0	0	0	1	1	1	0	0	1	0	0	0	0	0	0	1	1		1	0	1	0	1	1	0	0	0	1	1	0	1	0	1	0	0	0	1
		-0.771959	1	0	0	1	1	0	1	1	0	0	0	1	1	1	0	1	1	0	0		0	1	0	0	0	1	1	0	0	1	1	1	1	0	0	0	0	0	1
		-0.764138	1	1	1	1	0	1	0	0	0	1	0	1	0	0	1	0	1	1	1		0	1	1	1	0	0	1	0	1	1	0	0	1	1	1	1	0	0	0
		-0.756197	0	0	1	1	1	0	1	0	1	1	0	0	0	0	0	1	1	0	0		0	0	1	0	1	1	1	0	1	0	0	0	0	1	0	1	0	0	0
		-0.748136	0	0	1	0	1	1	1	0	1	0	0	0	1	0	1	1	0	1	1		0	0	0	1	1	0	0	1	1	0	0	0	0	0	0	0	1	1	0
		-0.739957	0	0	0	0	0	0	0	0	0	0	0	0	1	1	0	0	0	0	0		1	0	0	0	1	0	0	0	0	1	1	0	0	0	1	1	1	1	0
		-0.731661	0	0	0	0	1	0	0	1	0	0	0	1	0	0	0	0	0	1	0		1	0	0	0	0	1	0	1	1	1	1	1	1	0	0	0	0	1	1
		-0.723249	1	1	0	0	0	0	0	1	1	0	1	1	1	1	0	0	0	1	1		1	0	0	1	0	0	1	1	1	0	0	1	1	1	1	0	0	0	1
		-0.714723	1	1	1	1	1	1	1	1	0	1	1	0	0	1	0	1	1	0	1		0	1	1	0	1	0	1	0	0	0	0	0	0	1	0	0	1	0	0
		-0.706085	0	0	0	1	0	1	1	0	0	1	1	0	0	1	1	1	1	0	0		1	0	1	1	1	1	0	0	0	0	0	1	1	0	1	0	1	1	1
		-0.697335	0	0	0	0	1	0	0	1	1	0	0	0	0	0	1	0	0	0	0		1	1	0	1	0	1	0	1	0	1	1	0	0	1	0	1	1	1	1
		-0.688474	1	1	0	1	0	1	0	0	1	1	1	1	0	0	0	0	1	1	0		0	0	1	0	0	0	0	1	0	1	0	1	0	0	1	1	0	0	0
		-0.679506	0	0	1	0	1	0	0	0	0	0	1	1	0	0	0	0	0	1	1		0	1	0	0	0	1	0	1	1	0	1	0	0	0	1	1	0	0	0
		-0.670429	1	0	1	1	0	0	1	1	1	0	0	1	1	0	0	1	0	0	1		0	0	0	1	0	0	1	0	0	0	0	1	0	0	0	0	1	1	0
		-0.661247	0	1	1	0	0	0	1	0	1	0	0	0	1	1	1	1	1	0	0		0	1	1	1	0	0	0	0	1	0	1	0	1	0	0	0	0	0	0
		-0.651961	1	0	0	0	0	0	0	1	0	0	0	0	0	1	1	1	0	1	0		0	1	0	0	1	0	1	0	0	1	0	1	1	1	0	0	0	1	1
		-0.642571	0	0	1	0	0	0	0	0	0	1	1	0	1	0	1	0	1	0	0		1	0	1	0	0	0	1	0	1	0	1	1	1	1	1	1	1	0	1
		-0.63308	1	1	0	0	0	1	0	0	0	1	0	1	0	1	0	0	1	1	1		0	0	1	0	1	1	1	1	1	1	0	0	0	1	0	1	0	0	1
		-0.623489	0	1	0	1	1	1	1	1	0	1	0	1	1	0	1	1	0	0	1		1	0	0	0	1	1	0	0	0	0	0	0	0	0	1	0	0	0	0
		-0.6138	1	1	1	0	0	1	1	0	1	0	0	0	0	0	0	0	1	0	0		1	1	0	1	1	0	0	1	0	1	1	0	0	1	0	1	0	1	0
		-0.604014	0	0	0	1	1	0	0	1	1	0	1	1	1	0	0	1	0	0	0		1	1	0	1	0	1	0	1	1	1	0	1	1	0	0	0	0	1	1
		-0.594132	0	0	1	1	1	0	1	0	1	0	1	0	0	0	1	0	0	1	0		0	0	0	0	1	0	1	0	0	0	1	1	1	0	0	0	1	0	1
		-0.584156	0	0	0	0	0	1	0	1	0	1	1	0	1	1	0	0	0	1	0		1	1	1	0	0	1	1	0	0	0	0	0	0	0	1	0	1	0	0
		-0.574089	0	1	0	0	1	1	1	1	1	1	0	0	1	1	1	0	1	1	1		0	0	1	1	0	1	0	0	1	1	0	0	1	1	1	0	1	1	0
		-0.56393	1	1	1	1	0	1	1	0	0	0	0	1	0	1	0	0	0	0	1		0	1	0	1	1	0	1	0	0	1	1	1	0	1	0	1	0	0	0
		-0.553683	1	0	0	0	1	0	0	0	0	1	1	0	0	1	0	0	1	0	0		1	0	1	1	0	0	0	1	0	1	0	0	1	0	1	1	1	0	1
		-0.543348	0	1	1	1	0	0	0	0	0	1	0	1	0	0	1	1	0	0	1		0	0	0	0	0	0	0	1	1	0	1	0	0	0	0	0	0	0	0
		-0.532927	1	0	1	1	1	0	0	1	0	0	0	1	1	0	0	1	0	0	1		0	0	1	1	0	0	0	0	0	0	0	0	1	0	1	0	0	1	0
		-0.522422	0	0	0	0	0	0	0	0	1	1	1	0	0	0	1	0	0	1	0		1	1	0	0	1	1	1	1	1	0	1	0	0	1	0	1	1	1	1
		-0.511835	1	0	0	0	0	1	0	1	1	0	0	1	0	1	1	0	0	0	0		1	1	0	0	1	0	1	1	1	0	0	1	0	1	1	1	0	1	1
		-0.501167	0	1	1	1	1	1	1	0	1	0	1	0	0	0	0	1	1	1	0		0	1	1	1	0	1	0	1	1	1	1	1	0	1	0	1	1	0	0
		-0.490419	0	0	0	0	0	0	0	1	0	0	1	1	1	0	0	1	1	1	1		1	0	1	0	1	0	0	0	0	0	1	1	1	0	0	0	1	1	0
		-0.479595	0	1	0	1	1	0	1	1	0	0	0	0	1	1	0	0	0	0	1		0	0	1	1	1	0	0	0	0	1	1	0	1	1	1	0	0	0	1
		-0.468694	1	1	1	1	1	1	1	0	0	1	1	0	0	1	0	1	1	1	1		0	1	0	0	0	1	1	1	0	1	0	1	0	0	0	1	0	0	0
		-0.45772	0	0	1	0	0	1	1	0	1	0	0	1	1	1	1	1	0	0	0		1	0	0	1	1	0	1	0	1	0	0	1	0	0	1	1	1	1	0
		-0.446673	1	0	0	0	0	0	0	0	1	1	0	0	0	0	1	0	1	1	0		0	0	0	0	0	1	1	1	1	1	0	0	0	1	0	0	0	0	0
		-0.435556	1	1	0	1	0	0	0	1	0	1	0	1	1	0	0	0	0	0	0		1	0	0	1	1	1	0	1	0	0	1	1	1	0	0	0	1	1	1
		-0.424369	1	1	1	0	1	0	0	1	1	0	1	0	0	0	1	1	0	0	0		1	1	0	0	1	0	0	0	0	0	1	0	1	1	0	0	0	0	1
		-0.413116	0	0	0	1	1	0	0	0	0	1	0	1	1	0	1	1	1	0	0		0	1	1	0	0	0	1	1	1	1	0	1	1	1	1	1	0	1	1
		-0.401798	0	1	1	0	1	1	1	0	1	0	1	0	0	1	0	0	0	1	1		0	1	1	1	0	0	1	0	0	0	1	0	1	0	1	1	1	0	1
		-0.390416	1	0	0	1	0	0	1	0	0	1	1	1	1	1	0	0	1	1	0		0	0	1	0	0	1	0	0	0	1	0	1	0	1	1	1	0	1	0
		-0.378973	1	0	1	0	0	1	0	0	1	0	0	0	0	0	1	0	0	0	1		1	0	0	1	0	1	0	0	1	1	1	0	0	0	1	0	1	0	0
		-0.367469	0	0	0	0	0	1	1	1	0	1	1	0	0	1	0	0	1	0	1		1	1	0	1	0	1	1	0	1	0	0	1	1	1	0	0	1	0	0
		-0.355908	0	1	1	1	0	0	1	0	0	0	0	0	0	0	1	0	1	1	1		0	1	1	1	1	0	1	1	0	1	0	0	1	0	0	0	0	0	1
		-0.344291	0	1	0	0	0	0	0	1	1	0	1	1	0	1	0	1	0	0	0		0	1	0	0	0	0	0	1	1	0	1	0	0	0	0	1	0	0	0
		-0.332619	0	1	1	1	1	0	1	1	1	0	1	0	1	0	0	0	1	1	1		1	0	0	0	1	1	0	0	0	1	0	1	1	0	1	0	0	1	1
		-0.320894	1	0	1	0	0	1	0	0	0	1	0	1	1	0	1	1	0	0	0		1	0	0	0	1	1	0	1	0	0	1	0	0	1	0	1	1	1	1
		-0.309119	1	1	0	1	1	1	1	1	0	1	0	1	1	1	0	1	1	1	0		1	0	1	0	1	1	1	0	1	0	0	1	0	1	0	1	0	1	0
		-0.297295	0	0	0	1	1	1	0	0	1	1	0	0	0	1	1	1	1	0	1		0	1	1	1	0	0	1	1	1	0	1	0	1	1	1	0	1	1	0
		-0.285425	1	0	0	0	1	1	0	1	1	0	0	1	0	0	0	0	0	1	0		0	0	1	0	1	0	0	1	1	1	1	1	0	0	1	0	1	0	0
		-0.273509	1	0	1	0	0	0	0	1	0	0	1	0	0	1	1	1	0	0	1		0	1	1	1	0	0	0	0	0	1	0	0	1	0	1	0	1	1	1
		-0.261549	1	1	1	0	0	0	0	0	0	0	1	1	0	0	1	0	0	1	1		0	0	0	1	0	1	1	1	1	1	0	1	1	1	0	1	0	0	1
		-0.249549	0	0	0	0	0	1	1	0	0	0	1	0	1	1	0	1	1	0	0		1	1	0	0	0	1	1	0	0	0	0	1	1	1	1	1	0	0	1
		-0.237509	0	1	1	1	1	0	1	0	1	0	0	1	1	0	0	1	1	0	1		0	0	0	0	1	0	1	1	0	0	1	1	0	0	0	1	0	0	0
		-0.225432	0	0	0	0	1	0	1	0	1	0	0	0	1	1	1	0	0	1	0		1	0	1	0	0	1	1	0	0	1	0	1	0	0	0	0	1	1	0
		-0.213319	1	1	1	1	0	0	1	1	0	1	0	0	0	0	1	0	1	1	1		1	1	1	1	1	1	0	0	1	1	1	0	0	0	1	1	1	1	0
		-0.201172	1	0	0	1	0	1	0	1	0	1	1	0	1	1	0	0	0	0	0		0	1	0	1	1	0	1	0	0	0	0	0	1	0	0	1	1	0	1
		-0.188994	0	1	0	1	1	1	0	1	1	1	0	1	1	1	1	1	0	0	0		1	1	0	1	0	0	1	1	1	0	1	0	1	1	1	0	0	1	1
		-0.176786	0	1	1	0	1	1	1	0	1	1	0	1	0	0	0	0	1	1	0		0	0	1	0	1	0	0	1	1	0	1	0	0	1	0	0	0	0	0
		-0.16455	0	1	0	1	0	0	1	1	1	0	1	0	1	0	0	1	0	0	0		1	0	1	1	1	1	0	0	0	1	1	0	1	0	1	0	1	1	1
		-0.152288	1	0	1	0	1	0	0	0	0	0	1	1	0	0	1	0	1	1	1		1	0	0	1	0	1	0	1	1	1	0	1	0	1	0	1	1	0	1
		-0.140001	1	0	1	0	0	1	0	1	0	1	1	1	1	0	0	0	1	1	1		0	1	0	0	1	0	0	0	0	1	0	1	0	1	1	1	0	1	0
		-0.127693	1	0	0	1	0	1	0	1	0	1	0	0	1	1	1	1	1	0	1		0	1	0	0	0	0	1	0	0	0	1	1	0	0	0	0	1	0	0
		-0.115365	0	0	0	1	1	0	1	0	1	0	0	0	0	1	1	1	0	0	1		0	0	0	0	1	0	0	1	1	0	1	0	1	0	1	0	0	0	0
		-0.103018	0	1	0	0	1	1	1	0	1	1	1	0	0	1	1	0	0	0	1		1	0	1	0	0	1	0	0	0	1	1	0	1	1	0	1	0	0	1
		-0.0906551	1	1	1	1	0	0	0	1	0	0	1	1	0	0	0	0	0	1	0		0	1	0	1	0	1	1	1	1	0	0	0	1	1	0	1	0	1	1
		-0.0782779	1	0	1	0	1	0	0	0	0	1	0	1	0	1	0	1	1	1	1		1	1	1	1	1	0	1	1	0	1	0	1	0	1	0	0	0	1	1
		-0.0658883	1	1	1	1	0	1	1	1	1	0	0	1	1	0	1	1	0	1	0		0	1	1	0	0	1	1	0	1	0	0	1	0	0	1	1	1	0	0
		-0.0534883	0	1	1	1	0	1	1	0	1	1	0	0	1	0	1	0	1	0	0		1	0	1	1	1	0	0	0	0	1	1	0	0	0	1	0	1	1	1
		-0.0410799	1	1	0	0	1	0	1	1	1	0	1	0	1	0	0	0	0	1	0		1	1	0	0	1	1	1	1	1	1	1	1	1	1	0	1	1	1	0
		-0.0286649	0	0	0	0	1	0	0	0	0	1	1	0	0	0	0	0	1	0	1		1	0	1	1	1	0	0	1	1	0	0	1	1	1	1	1	0	0	1
		-0.0162455	0	0	0	0	0	0	1	0	0	1	1	0	1	1	0	1	1	0	1		0	0	0	0	0	1	0	1	0	0	1	0	0	1	1	0	1	0	1
		-0.00382342	0	0	0	1	1	0	0	1	1	1	0	1	1	1	0	1	0	0	0		0	0	1	0	0	0	1	0	0	1	1	1	1	0	0	0	0	1	0
		0.00859921	0	0	1	1	1	0	0	0	1	0	0	1	1	1	1	1	0	0	0		0	0	0	1	0	1	0	0	0	1	0	0	0	0	1	1	0	1	1
		0.0210205	1	1	0	0	0	1	0	1	1	0	1	0	0	1	1	1	0	1	0		1	1	0	1	1	1	1	1	1	0	0	0	1	1	0	1	1	1	0
		0.0334384	1	1	1	1	0	0	0	1	0	0	1	0	0	0	1	0	1	1	1		1	1	1	0	0	0	0	1	1	0	0	1	1	1	1	0	0	0	0
		0.0458511	1	0	1	1	0	1	0	1	0	1	0	1	0	0	0	0	1	0	1		0	1	1	0	1	0	1	1	0	1	1	1	0	0	1	0	1	0	0
		0.0582565	1	1	1	0	1	1	1	0	0	0	0	1	1	1	0	1	1	1	1		1	0	1	1	1	0	1	0	0	0	1	1	1	0	1	0	1	1	1
		0.0706528	0	0	0	0	0	1	1	1	1	1	1	1	1	1	1	0	1	0	0		0	1	0	1	1	1	0	0	1	1	1	0	0	0	0	1	1	1	1
		0.0830379	1	1	0	0	1	0	1	0	1	0	0	0	0	1	1	0	0	1	0		1	0	1	1	0	1	1	0	1	1	0	0	1	1	0	1	0	0	1
		0.0954098	0	1	1	1	0	1	0	1	0	1	1	1	0	0	1	0	0	1	1		0	1	0	0	0	0	0	1	1	0	1	1	1	1	0	1	1	0	0
		0.107767	1	0	1	1	1	0	1	0	0	0	1	1	1	0	0	1	1	1	1		1	0	0	1	1	1	1	1	0	0	0	0	0	0	1	1	0	0	0
		0.120107	0	1	0	0	0	1	1	0	1	0	0	0	1	0	1	1	1	1	0		1	1	1	0	1	1	0	0	0	0	0	0	0	1	0	0	1	1	0
		0.132428	0	0	0	1	1	1	1	0	1	0	0	0	0	1	0	0	0	0	1		1	1	0	0	0	0	0	1	0	1	1	1	1	1	0	1	1	1	1
		0.144728	0	1	1	0	1	0	0	1	0	1	1	0	0	1	0	1	1	0	0		0	0	1	1	0	0	1	1	1	1	0	0	1	0	1	0	0	1	1
		0.157005	1	0	1	1	0	1	0	1	0	1	1	1	1	0	0	0	0	0	1		0	1	1	0	1	1	1	0	1	0	1	1	0	0	1	0	1	0	0
		0.169257	1	0	0	1	1	0	1	1	0	1	1	1	1	0	1	1	0	1	1		1	0	0	1	1	1	0	0	0	1	1	1	1	0	1	0	1	1	1
		0.181483	1	0	0	0	1	1	1	0	1	0	0	1	0	0	0	1	1	1	0		1	0	0	1	1	0	1	0	1	1	1	0	1	0	0	1	0	0	1
		0.19368	0	1	0	1	0	1	0	1	1	1	0	0	1	1	1	1	1	0	1		1	1	0	1	0	0	0	1	1	0	0	1	0	1	1	1	0	0	0
		0.205846	1	1	0	0	1	0	1	0	1	0	1	0	0	1	1	0	0	1	0		0	1	1	1	0	0	0	1	1	0	1	0	0	1	0	0	1	0	1
		0.21798	0	0	1	1	0	0	0	1	0	0	0	1	1	0	0	0	1	1	1		0	0	1	0	1	1	1	1	1	0	0	1	0	0	1	0	1	1	0
		0.230079	1	0	1	0	0	0	1	1	1	0	0	0	0	1	1	1	1	0	0		0	1	0	0	1	1	0	0	0	1	1	0	1	1	1	0	0	1	1
		0.242142	0	1	1	1	1	1	0	0	1	1	1	1	1	1	0	1	0	0	1		1	0	1	0	1	1	1	1	0	1	0	1	1	1	0	1	1	1	1
		0.254167	0	1	1	0	0	1	1	0	0	0	1	0	1	1	0	1	0	0	0		1	0	0	1	0	0	1	0	0	1	0	0	0	1	0	1	0	1	0
		0.266152	1	1	0	1	1	0	0	0	0	1	0	1	0	0	1	0	0	0	0		0	1	1	0	1	1	1	1	1	0	1	0	0	1	1	1	0	0	0
		0.278095	0	0	1	0	0	1	1	0	0	1	1	1	0	0	1	0	1	1	1		1	0	1	1	0	0	1	0	0	1	1	1	1	0	1	0	1	0	1
		0.289994	1	0	1	0	1	0	0	1	1	1	1	0	1	0	0	0	0	1	1		1	1	1	1	0	0	0	1	1	1	1	0	1	0	0	0	1	1	0
		0.301847	0	1	0	1	1	1	1	0	1	1	0	0	1	1	1	1	1	1	0		1	1	0	1	1	1	1	0	1	0	0	1	1	0	1	1	0	1	1
		0.313652	1	1	1	0	0	1	1	1	1	0	0	1	0	1	1	1	0	0	1		0	1	1	1	0	0	1	1	0	1	1	1	0	1	1	1	1	0	1
		0.325408	1	1	0	1	1	0	0	1	1	1	1	0	0	1	0	0	1	1	0		0	0	1	0	1	1	0	1	1	0	0	1	1	0	0	1	0	1	0
		0.337112	1	0	1	1	0	1	1	1	0	0	1	1	1	0	1	1	0	1	1		1	1	1	1	0	1	0	1	0	1	1	0	1	1	1	0	1	1	1
		0.348763	0	1	1	0	0	1	0	1	1	0	0	1	0	1	0	0	1	0	0		0	1	0	0	1	1	0	0	1	1	1	1	0	1	0	1	1	1	1
		0.36036	0	0	1	1	1	0	0	0	0	0	0	1	1	1	1	0	1	1	1		1	0	0	1	1	0	1	1	1	1	0	0	0	0	1	0	0	0	0
		0.371899	0	1	0	1	1	0	1	0	0	1	1	0	1	0	1	1	0	0	0		0	1	0	0	0	1	1	0	0	0	1	1	0	0	0	0	1	0	0
		0.383379	1	0	0	0	0	0	0	1	0	1	1	0	0	0	0	1	1	0	0		1	0	1	0	1	0	1	0	0	0	0	1	1	0	1	0	1	0	1
		0.394799	1	1	0	1	0	1	1	0	1	0	1	0	1	0	0	0	0	1	1		1	1	0	1	1	1	0	0	1	1	0	0	1	1	0	1	0	1	1
		0.406157	0	0	1	0	1	1	1	1	1	1	0	1	0	0	1	1	1	1	1		1	0	1	0	0	1	1	0	1	0	0	1	1	1	1	1	0	1	1
		0.41745	0	1	1	1	0	1	0	0	1	1	0	1	0	1	1	1	1	0	1		0	0	1	1	0	0	1	1	1	0	1	0	1	1	0	1	1	0	0
		0.428678	1	0	0	0	1	0	0	1	1	0	1	0	1	1	0	0	0	1	0		0	1	1	0	0	1	0	1	0	0	1	1	0	0	0	1	1	1	1
		0.439838	1	1	1	0	0	0	1	1	0	1	0	1	0	1	0	0	1	1	0		1	0	1	1	1	1	0	0	0	1	1	0	1	1	1	0	0	1	0
		0.450928	1	0	0	1	1	1	0	0	0	0	1	0	1	0	0	1	0	1	1		1	1	0	0	1	1	0	1	0	1	1	0	1	1	0	1	0	1	0
		0.461947	1	1	0	1	0	1	1	0	0	1	1	1	1	0	1	1	1	0	1		1	1	0	1	1	0	1	1	1	1	0	1	1	0	1	1	0	0	1
		0.472894	0	1	1	0	1	0	1	0	1	0	0	0	1	1	1	0	1	0	0		0	1	1	0	0	0	1	1	1	0	1	1	0	1	1	0	0	0	1
		0.483765	0	0	0	0	1	1	1	1	1	1	1	1	0	1	1	0	0	0	1		0	0	0	1	0	0	1	0	1	1	0	1	0	0	1	0	1	0	0
		0.49456	0	0	1	1	1	0	0	1	0	1	1	0	1	1	1	0	1	1	0		0	0	0	0	1	1	0	0	0	1	1	0	1	1	1	1	1	1	1
		0.505278	1	0	1	1	0	0	1	1	1	0	0	1	0	0	0	1	0	1	1		1	1	0	1	1	1	1	1	1	1	0	0	0	0	0	0	1	1	0
		0.515915	1	1	1	1	0	1	0	0	0	1	0	1	1	1	0	1	0	1	1		0	1	0	1	0	0	0	1	1	0	1	1	0	1	0	1	0	1	0
		0.526471	0	1	0	0	1	1	1	1	1	0	0	0	1	0	1	1	0	0	1		1	1	1	0	1	1	0	1	1	1	1	1	0	0	1	1	1	0	0
		0.536943	1	0	0	0	1	0	1	0	1	1	1	1	0	1	1	1	0	0	0		1	0	1	1	1	1	1	0	0	1	0	1	1	1	1	0	1	1	1
		0.547331	0	1	0	0	0	0	0	1	0	1	1	0	0	0	1	0	1	1	0		0	1	0	1	0	1	0	1	0	1	0	0	1	1	0	1	1	1	1
		0.557633	1	0	1	1	1	1	1	0	0	0	1	1	0	0	0	0	1	1	0		1	0	1	0	0	0	1	1	1	0	0	1	1	1	1	1	0	1	1
		0.567846	0	1	1	1	0	1	0	0	1	1	0	1	1	1	0	1	1	1	0		0	0	1	1	0	1	1	1	1	0	1	1	0	0	1	0	0	0	0
		0.57797	0	1	1	1	1	1	0	0	1	0	1	0	1	1	0	0	1	0	0		1	0	1	0	1	0	1	0	1	0	1	1	1	0	0	0	1	0	1
		0.588002	1	1	0	0	1	1	1	1	1	1	0	0	0	0	1	1	0	0	1		1	1	0	1	1	1	0	0	0	1	1	0	1	0	1	1	0	1	1
		0.597942	1	1	1	1	0	0	0	1	0	0	0	0	0	0	1	0	1	1	1		1	1	1	1	1	1	1	0	1	1	0	0	0	1	0	1	0	0	1
		0.607787	1	0	1	0	0	1	1	1	1	0	1	1	1	1	0	1	1	1	1		0	1	1	1	0	0	1	1	1	1	0	1	1	1	0	0	1	0	0
		0.617536	1	0	1	1	0	0	0	1	0	1	0	1	1	1	1	0	1	1	1		1	1	1	0	1	1	0	1	0	0	1	0	0	1	1	1	1	1	0
		0.627188	0	1	0	0	1	1	1	0	1	0	1	1	0	1	0	1	0	0	1		0	0	1	0	1	0	0	1	0	1	1	0	1	0	1	0	0	1	0
		0.636741	1	1	1	1	1	0	1	1	0	1	1	0	0	1	0	1	1	0	0		1	0	0	1	1	0	1	0	0	0	1	1	0	1	0	1	1	0	1
		0.646193	0	0	0	0	1	0	0	0	1	1	1	0	1	0	1	0	0	1	1		1	1	1	1	0	1	1	1	1	1	0	1	1	1	1	0	0	1	1
		0.655543	0	1	0	1	0	1	1	1	0	1	0	1	1	1	0	1	0	1	1		0	1	0	1	1	0	1	1	1	0	1	1	0	1	1	1	1	1	0
		0.66479	1	0	0	0	1	1	1	0	0	0	0	1	0	0	1	1	1	0	1		1	0	0	0	0	1	0	0	1	1	1	0	0	0	0	0	1	0	1
		0.673931	0	1	1	1	0	1	1	1	1	0	0	1	1	1	1	1	0	1	0		1	0	1	0	1	1	0	0	0	1	1	0	1	0	1	1	1	1	1
		0.682966	1	1	0	0	0	0	0	1	1	1	1	0	0	0	1	0	1	0	0		0	1	0	1	0	0	1	1	1	0	0	1	1	1	0	1	0	1	1
		0.691894	0	0	1	1	0	0	0	0	0	1	1	1	1	1	1	0	0	0	0		0	1	1	1	1	0	1	0	1	1	0	1	0	0	1	1	1	1	1
		0.700712	1	0	1	1	1	0	1	1	1	0	1	1	1	0	0	0	0	1	1		1	1	1	0	0	1	1	1	0	0	1	0	1	1	1	1	0	0	0
		0.709419	1	1	1	1	1	1	1	0	1	1	0	0	1	0	0	1	1	1	1		1	1	1	1	1	1	1	0	0	1	0	1	1	0	1	0	1	0	0
		0.718015	0	1	1	0	1	1	1	1	1	0	1	0	0	1	1	1	0	0	1		0	0	0	0	1	1	0	1	1	1	1	0	1	1	0	0	1	0	1
		0.726497	1	0	0	1	1	0	0	1	0	1	0	0	0	1	1	0	1	1	0		1	1	0	0	1	1	0	0	1	1	0	1	1	1	0	1	0	1	1
		0.734864	1	0	0	0	0	0	1	0	1	1	1	1	1	0	1	1	1	1	1		0	1	1	1	0	0	1	1	1	0	1	1	0	1	1	1	1	0	0
		0.743115	1	0	1	1	0	1	0	1	0	0	1	1	1	1	0	1	1	0	1		1	0	1	0	1	1	1	1	0	0	1	1	0	0	1	1	0	1	0
		0.751249	0	1	0	1	1	1	0	0	0	0	0	1	1	1	0	0	0	1	0		1	1	0	1	0	0	0	0	0	1	1	0	1	1	1	0	1	1	0
		0.759264	0	1	1	0	1	1	1	1	0	0	1	1	0	1	1	0	1	0	0		1	0	1	1	1	1	0	1	1	1	1	0	1	0	0	1	0	1	1
		0.76716	1	1	0	0	1	0	0	1	0	1	0	0	0	0	1	0	0	1	0		1	1	1	1	0	0	1	0	1	1	0	1	0	1	0	0	0	1	1
		0.774934	0	0	1	0	0	0	1	0	1	1	0	1	1	0	0	1	1	1	1		0	1	0	0	0	1	1	1	0	0	0	1	0	0	1	0	1	0	0
		0.782586	1	0	1	1	1	1	1	1	1	1	1	0	0	1	1	1	1	0	1		0	0	1	0	1	1	0	1	0	1	1	1	1	1	1	0	1	0	1
		0.790114	0	1	1	1	0	1	0	0	1	0	0	1	1	1	0	1	0	0	1		1	1	0	1	1	1	0	0	1	1	1	0	1	0	0	1	1	1	1
		0.797517	1	1	0	0	1	1	0	1	0	0	1	1	1	0	0	1	0	0	0		0	0	1	1	1	1	1	1	0	0	0	0	1	1	1	1	0	1	1
		0.804795	0	1	1	1	0	0	0	1	0	1	1	0	0	0	1	0	0	1	0		0	1	0	1	0	0	1	1	1	0	0	1	0	1	1	1	1	0	0
		0.811945	1	0	0	1	0	1	1	0	1	1	0	0	1	1	0	0	1	1	1		1	0	1	0	1	0	0	0	1	1	1	1	0	0	0	1	1	1	1
		0.818968	1	1	1	0	1	0	1	0	1	1	1	1	1	0	1	1	1	1	1		1	1	1	1	1	1	0	0	1	1	1	0	1	0	1	0	1	0	0
		0.825861	0	1	1	0	1	0	1	1	0	0	0	0	0	1	1	0	1	0	1		0	0	0	1	0	1	0	1	0	0	0	0	1	1	0	0	1	1	1
		0.832623	1	0	0	0	1	1	0	0	1	0	1	1	0	1	1	1	0	0	0		1	1	1	0	0	0	1	1	1	0	0	1	1	1	1	1	0	1	1
		0.839254	0	1	1	1	0	0	1	1	0	1	1	0	0	1	1	0	1	1	1		0	1	1	1	1	0	1	1	0	0	0	1	0	1	1	1	0	0	0
		0.845753	1	0	0	1	0	1	0	0	1	1	1	1	1	0	0	1	0	1	0		1	0	0	0	1	1	1	0	1	1	1	1	1	0	0	0	1	1	1
		0.852118	1	1	0	1	1	1	1	1	1	1	1	1	1	1	0	1	1	1	0		1	1	0	1	0	1	0	0	0	1	1	0	0	0	1	0	1	1	0
		0.858348	0	1	1	1	1	1	1	0	0	0	0	1	1	0	0	1	1	0	0		1	1	1	1	1	1	1	1	1	1	0	1	0	1	0	1	0	1	1
		0.864443	1	1	0	0	1	0	1	1	1	0	0	0	0	1	1	0	0	0	1		0	1	1	1	0	0	1	1	1	1	1	1	1	1	1	1	1	0	1
		0.870401	1	1	1	0	0	0	0	0	0	0	1	0	1	0	1	0	1	1	1		0	0	0	0	1	0	1	1	1	0	1	0	0	0	1	0	0	0	0
		0.876222	0	0	1	1	0	1	1	1	1	1	0	1	1	1	0	1	1	1	1		1	0	0	1	1	1	1	0	0	1	1	0	1	1	1	0	1	0	1
		0.881905	0	0	1	1	1	0	0	0	1	1	1	1	0	0	1	1	1	0	1		0	1	1	0	1	1	0	1	1	1	1	1	1	1	0	0	0	1	1
		0.887448	0	0	0	1	0	1	1	1	1	0	0	1	0	1	0	0	0	0	0		1	0	0	0	1	0	1	1	1	1	0	1	1	0	1	1	1	1	0
		0.892851	1	1	0	0	1	0	1	1	0	1	1	0	1	1	1	1	0	0	0		0	1	1	1	0	1	0	0	1	0	1	1	0	1	0	1	0	0	0
		0.898113	1	1	1	1	1	1	0	0	0	1	0	0	0	0	0	0	1	1	1		1	0	1	0	1	1	1	1	0	0	0	1	1	0	0	0	1	1	1
		0.903234	1	0	0	1	0	1	0	0	0	0	1	1	1	1	0	1	1	1	1		1	1	1	1	0	0	0	0	1	1	1	0	1	1	1	1	1	0	0
		0.908211	0	1	1	0	1	0	1	0	1	1	0	1	1	0	1	1	1	1	0		1	1	0	1	1	1	1	1	0	0	0	1	0	1	0	1	0	1	1
		0.913046	0	1	0	0	1	1	1	1	1	0	1	1	0	1	1	1	0	0	0		0	1	1	1	0	0	1	1	0	1	1	0	1	1	1	0	0	0	1
		0.917736	1	0	1	0	1	0	1	1	0	1	0	0	1	1	1	0	0	1	1		0	1	0	1	1	1	1	0	1	0	1	1	0	0	1	1	1	1	0
		0.922281	1	1	1	1	0	0	0	1	1	1	1	0	0	0	1	0	1	1	1		1	0	0	0	1	1	0	0	0	1	1	0	1	0	1	0	1	1	1
		0.92668	0	0	0	1	1	1	1	1	0	0	1	0	1	0	0	0	1	1	0		1	1	1	1	0	0	0	1	1	1	1	1	1	1	0	1	1	1	1
		0.930934	1	1	1	0	0	1	0	0	1	0	0	1	1	1	1	1	1	0	1		1	1	0	1	1	1	1	1	1	0	0	1	1	1	0	1	0	1	1
		0.93504	0	1	1	0	0	1	1	0	1	0	0	0	1	1	1	1	0	0	1		0	0	0	0	0	0	1	1	1	0	1	0	0	1	1	1	1	0	0
		0.938998	1	1	0	1	1	0	0	1	0	0	1	0	0	1	0	1	0	1	0		1	1	1	0	1	1	1	0	1	0	1	1	0	0	1	1	1	0	0
		0.942809	1	0	0	1	0	0	0	1	1	1	1	1	1	0	0	0	1	1	1		1	0	1	1	1	1	0	0	0	1	0	0	1	0	1	0	1	1	0
		0.94647	0	0	1	1	1	0	1	1	1	1	0	1	0	0	0	0	0	0	0		0	0	0	1	1	1	1	1	1	1	0	1	1	1	0	0	0	1	1
		0.949982	0	0	1	1	1	0	0	0	1	1	0	1	0	1	1	1	1	1	1		0	1	1	1	0	0	1	1	0	1	1	0	0	1	1	1	0	0	1
		0.953344	0	1	1	0	1	1	1	0	0	0	1	1	1	1	1	1	0	0	0		1	0	1	0	0	1	0	1	1	1	1	1	1	1	1	1	1	1	0
		0.956555	1	0	0	0	0	0	1	1	0	1	1	0	0	0	1	1	1	1	0		0	1	1	1	1	0	1	0	0	0	0	0	0	0	1	0	1	0	1
		0.959616	1	1	0	1	0	1	0	0	0	1	0	0	1	0	1	0	0	0	1		1	0	0	0	1	1	0	1	1	1	1	1	1	1	0	1	1	1	1
		0.962524	1	0	1	1	1	1	1	1	1	0	0	1	0	0	0	0	1	1	1		1	1	1	1	1	1	1	0	1	1	0	1	1	0	1	1	0	1	1
		0.965281	1	1	1	1	1	1	1	0	1	0	1	1	1	1	1	1	1	0	1		0	1	1	0	0	0	0	0	0	0	1	1	0	0	0	0	0	0	0
		0.967885	0	1	0	0	0	1	0	1	1	1	0	0	1	1	0	1	0	1	1		1	0	1	0	1	1	0	1	1	1	1	0	0	0	0	0	0	1	1
		0.970337	1	1	1	0	1	0	0	1	0	0	1	0	0	1	1	0	1	1	0		1	1	0	1	0	1	0	0	0	1	1	1	1	1	1	1	1	1	0
		0.972635	0	0	0	0	0	1	1	1	1	1	1	1	1	0	0	1	1	0	1		1	1	0	1	1	0	1	1	1	0	0	0	1	1	0	1	1	1	1
		0.97478	1	1	1	1	0	1	0	0	1	1	1	1	1	1	1	0	0	1	0		0	0	0	0	0	0	1	1	1	1	0	1	0	1	1	0	0	0	1
		0.976771	1	0	1	1	1	0	1	0	0	0	0	0	1	1	1	0	0	0	1		1	1	1	0	1	0	1	1	1	0	1	1	1	0	1	0	1	0	0
		0.978607	0	0	0	1	1	0	1	0	0	1	1	1	0	1	0	1	0	1	0		1	0	1	1	1	1	1	0	0	0	0	0	0	1	1	0	1	1	1
		0.980289	0	1	0	0	1	0	1	1	0	1	1	0	0	1	0	0	1	0	1		1	1	0	1	0	1	0	1	1	1	1	1	1	1	0	1	1	1	1
		0.981816	1	1	0	1	0	1	0	1	1	1	0	1	0	0	1	1	1	1	0		0	1	1	1	1	1	1	0	0	1	0	1	1	0	1	1	0	0	0
		0.983189	1	0	1	1	1	1	1	1	0	0	1	0	1	0	0	1	1	1	1		0	0	1	1	0	0	1	1	0	0	1	0	1	1	1	1	1	0	0
		0.984406	0	1	1	1	0	0	1	0	1	0	0	1	1	1	1	1	1	0	1		1	0	1	0	1	1	0	1	1	1	1	1	0	0	0	1	0	0	1
		0.985467	1	1	1	0	1	1	0	1	1	0	1	1	0	1	1	1	0	1	0		0	1	0	0	1	1	0	0	0	1	1	0	1	1	1	0	0	1	1
		0.986373	0	0	0	0	1	0	0	0	0	1	0	0	0	0	1	0	0	1	0		1	1	1	1	0	0	0	0	1	1	0	1	1	0	0	1	1	1	1
		0.987123	1	1	1	0	0	1	0	1	1	1	1	1	1	0	0	0	0	0	1		0	0	0	1	1	0	1	1	1	1	1	1	0	1	1	1	0	1	0
		0.987717	0	0	0	1	1	1	0	0	1	1	1	1	1	1	0	1	1	1	1		1	1	1	0	0	0	1	1	1	0	0	0	0	0	1	0	1	0	1
		0.988155	0	1	1	1	0	1	1	1	1	0	0	0	0	0	1	0	1	0	0		1	0	1	0	1	1	1	1	0	0	1	0	0	1	1	0	1	1	0
		0.988438	1	1	1	0	1	0	1	1	0	1	1	1	1	1	0	1	0	1	1		1	1	0	1	1	1	0	0	1	1	1	0	1	0	0	0	1	0	1
		0.988564	1	0	0	1	0	0	0	0	0	0	0	0	0	0	0	0	1	0	0		1	1	1	1	1	1	1	0	0	1	0	1	1	1	1	1	0	1	1
		0.988534	1	0	1	1	0	1	1	1	0	0	0	0	1	1	0	1	1	0	1		0	1	0	1	0	0	1	1	0	0	1	1	0	1	0	1	0	0	0
		0.988347	1	0	1	0	1	1	1	0	1	1	0	1	1	0	1	1	1	1	0		0	0	1	0	0	1	0	1	0	0	1	1	1	0	0	1	1	1	1
		0.988005	0	1	0	0	1	1	1	1	0	0	1	1	1	1	1	0	0	0	1		0	0	0	1	1	1	0	0	0	1	0	0	1	1	1	0	1	0	0
		0.987507	0	1	0	0	1	0	1	0	1	1	1	1	0	1	1	1	0	1	0		1	1	1	1	1	1	1	1	1	0	0	1	0	1	0	1	1	1	1
		0.986853	0	1	1	0	0	0	0	1	0	1	1	0	1	0	1	0	0	1	1		1	1	1	1	1	0	1	1	1	1	0	0	1	1	1	1	0	1	0
		0.986043	1	0	1	1	0	1	0	0	1	1	1	1	0	0	0	1	1	1	1		0	0	0	0	0	1	1	0	1	0	1	1	0	0	1	1	1	0	1
		0.985077	1	1	0	1	1	1	1	0	1	0	0	0	0	1	1	0	1	1	0		1	1	1	0	0	0	1	1	0	1	1	1	1	1	1	0	1	1	0
		0.983956	0	1	1	1	0	1	1	1	1	0	0	1	0	1	0	0	0	0	1		1	1	0	1	1	1	0	0	0	1	1	0	1	1	0	1	0	0	1
		0.982679	0	0	0	0	1	0	0	1	0	0	0	0	0	0	1	0	1	0	0		0	0	1	1	1	0	0	1	1	1	0	1	1	0	1	0	0	1	1
		0.981248	1	0	1	1	0	0	0	1	0	1	1	0	1	0	1	1	0	1	0		0	0	1	0	0	0	0	1	1	0	1	1	0	1	1	0	1	0	0
		0.979661	1	0	0	0	1	0	1	0	1	1	1	1	1	0	0	0	1	1	0		0	0	1	1	1	1	1	1	1	1	1	1	0	0	0	1	1	1	1
		0.97792	1	1	0	0	0	0	1	0	1	1	1	1	1	1	1	0	1	0	1		1	1	1	1	1	1	0	0	0	0	1	0	1	0	1	0	0	1	1
		0.976024	0	1	1	1	0	1	1	1	1	0	0	1	1	1	0	1	0	0	1		1	1	0	0	0	1	1	0	1	1	0	0	1	1	0	1	1	1	0
		0.973974	1	1	0	0	0	1	0	0	0	1	1	0	0	1	0	1	0	0	0		1	1	1	0	1	1	1	1	0	1	0	1	0	1	1	0	0	0	1
		0.97177	1	0	1	1	1	0	0	0	0	1	0	0	0	1	1	0	1	1	0		0	1	0	1	0	0	1	1	1	0	1	1	1	1	1	1	1	0	0
		0.969413	0	0	1	1	0	1	1	1	1	0	1	1	1	0	0	1	1	1	1		1	0	1	0	1	0	1	0	1	1	1	0	0	0	0	0	1	1	0
		0.966902	0	0	1	1	1	1	1	0	1	0	0	1	1	1	1	1	1	0	1		1	1	0	1	1	1	0	1	0	1	1	1	1	0	1	1	0	1	1
		0.964239	0	1	0	1	1	0	1	1	0	1	1	0	0	0	1	1	0	0	1		1	0	0	1	0	1	0	0	1	0	0	0	1	1	0	1	0	1	1
		0.961424	1	1	0	0	1	0	0	1	0	1	0	0	0	1	1	0	0	1	0		0	1	0	0	0	1	1	1	0	1	1	1	0	1	1	1	0	0	0
		0.958457	1	1	0	0	0	1	0	0	0	0	0	1	0	0	0	1	1	1	1		0	0	1	0	0	0	1	1	1	0	0	1	1	0	1	1	1	0	0
		0.955338	1	0	1	1	0	0	0	1	1	0	1	1	1	1	1	0	1	1	0		1	1	1	1	1	1	1	0	0	0	1	0	1	1	0	0	1	0	1
		0.952069	0	0	1	1	1	1	1	0	1	1	0	0	1	0	0	1	0	0	1		1	1	1	1	1	1	0	1	1	0	0	1	0	0	0	1	0	1	1
		0.94865	1	1	1	0	1	1	1	1	1	0	1	0	1	1	0	1	0	0	1		0	1	0	1	1	0	0	1	0	1	1	1	0	1	0	0	0	1	1
		0.94508	0	1	0	0	1	0	0	1	0	1	1	1	0	1	1	0	1	1	0		0	0	1	0	0	0	1	0	1	0	0	1	0	0	0	1	1	0	0
		0.941361	0	1	0	1	0	1	1	1	1	0	0	0	1	0	0	0	1	1	1		1	1	1	1	1	1	1	1	1	1	0	0	1	0	1	0	1	1	1
		0.937494	0	0	1	0	1	1	0	0	0	0	0	1	1	0	1	1	0	1	0		1	0	0	0	1	0	0	0	0	1	1	1	1	1	1	1	1	1	1
		0.933479	1	0	1	1	1	0	0	0	0	1	0	1	0	1	1	0	1	0	0		1	1	1	1	1	1	1	1	0	1	0	0	1	1	0	0	0	0	1
		0.929316	0	1	1	0	1	0	1	1	1	0	1	1	1	1	0	1	0	0	1		0	1	0	1	0	0	0	0	1	0	1	0	0	1	1	0	1	1	0
		0.925006	1	1	0	0	0	0	0	1	0	1	1	0	0	1	1	0	0	1	0		0	0	0	0	1	1	1	1	1	0	1	1	1	0	1	1	1	0	1
		0.920551	1	0	0	1	0	0	1	1	1	1	1	0	0	0	0	1	1	0	1		1	0	1	0	0	0	0	0	0	1	1	0	1	1	1	0	1	1	0
		0.91595	1	0	1	1	1	1	0	0	1	0	1	1	1	1	0	0	1	1	1		1	1	0	1	1	1	1	1	1	0	1	1	1	1	0	1	0	1	1
		0.911204	1	1	1	1	1	1	1	0	0	0	0	1	0	0	0	0	0	1	0		0	0	1	1	0	1	1	1	1	1	0	0	0	0	1	0	0	1	1
		0.906315	0	1	0	0	0	1	1	0	0	1	1	0	0	1	1	1	1	0	1		1	1	1	1	1	0	1	1	1	0	1	1	0	1	1	1	1	0	0
		0.901282	0	1	1	0	0	0	1	1	1	1	0	0	0	0	1	0	0	1	0		1	0	1	0	0	1	0	0	0	1	0	0	0	0	0	0	1	1	0
		0.896107	1	0	0	1	0	1	0	0	1	1	1	1	1	0	0	1	0	0	1		1	1	1	1	1	0	0	0	0	1	1	1	1	1	0	1	1	1	1
		0.890791	1	0	0	1	0	0	1	0	0	1	0	0	1	0	1	1	1	1	1		1	0	0	0	1	0	1	0	1	1	0	1	1	0	0	1	0	0	1
		0.885333	0	0	1	1	1	1	1	1	1	0	1	1	1	0	1	1	1	0	0		0	1	0	1	0	0	1	1	1	1	1	1	0	1	1	1	0	0	0
		0.879737	0	1	0	0	1	1	0	1	0	0	0	0	1	1	0	0	0	0	0		0	0	1	0	1	1	1	1	0	0	0	0	1	0	1	0	1	0	0
		0.874001	0	1	1	0	1	0	0	1	0	1	0	0	0	1	0	0	1	1	0		0	1	0	1	1	1	0	1	0	1	1	0	1	1	1	0	1	0	0
		0.868127	0	0	1	0	0	1	0	1	1	1	1	1	1	0	0	0	0	1	1		1	1	1	1	0	1	1	0	1	1	1	1	1	1	0	1	0	1	1
		0.862116	1	1	0	1	0	0	0	0	1	0	0	0	0	1	1	1	1	0	1		1	0	0	0	0	1	0	1	1	0	1	1	0	1	0	1	0	1	1
		0.855969	1	0	1	1	1	0	0	0	0	0	1	1	1	1	1	1	1	0	0		0	1	0	1	0	0	0	0	0	0	0	1	0	0	1	1	1	0	0
		0.849687	0	0	0	0	0	0	1	0	0	0	0	1	0	1	1	0	0	0	0		1	0	1	0	1	1	1	1	1	1	1	0	1	0	1	0	0	1	1
		0.84327	1	1	0	1	1	1	0	0	0	1	1	0	1	1	1	0	1	1	0		1	1	1	1	1	0	0	0	0	0	1	0	1	0	1	1	1	1	1
		0.836721	1	1	1	0	0	1	1	1	1	1	1	0	0	0	0	1	1	1	1		0	1	0	0	1	0	1	1	1	0	1	0	1	1	0	0	0	1	0
		0.830039	1	0	0	0	1	0	1	0	1	0	1	1	0	0	0	1	0	1	1		0	1	0	0	0	0	0	0	1	1	0	1	0	1	1	1	1	0	0
		0.823226	0	1	1	1	0	0	1	1	1	1	0	1	1	0	1	1	0	0	1		0	0	1	0	1	1	0	0	0	0	0	1	1	0	1	1	1	0	1
		0.816283	0	1	0	0	1	1	0	1	0	0	1	0	0	1	1	1	0	0	0		1	1	1	1	0	1	1	1	1	1	1	0	0	1	1	0	0	0	1
		0.809212	1	0	0	1	1	0	0	0	1	0	0	0	1	0	0	0	1	0	1		1	1	0	1	1	1	0	0	0	1	0	1	1	1	0	1	1	1	0
		0.802012	0	0	1	0	0	1	1	0	0	1	0	0	1	1	0	0	1	1	0		1	0	1	1	1	1	1	1	1	1	0	1	1	0	0	0	0	1	1
		0.794686	0	1	1	1	0	1	1	0	1	1	0	1	0	1	0	1	1	1	1		0	1	1	1	0	0	1	1	1	0	0	1	0	1	1	1	1	0	0
		0.787234	0	1	0	1	1	1	1	1	0	0	1	1	0	0	0	1	0	0	0		1	0	1	0	1	1	1	1	0	1	1	0	1	0	0	0	0	1	1
		0.779658	1	1	0	0	1	0	0	1	0	0	1	0	1	0	1	0	0	0	0		0	0	0	0	0	1	0	0	0	1	1	1	0	1	0	1	1	1	1
		0.771959	1	0	1	0	0	0	0	1	0	1	0	0	0	1	1	0	0	1	0		1	1	0	1	1	0	1	1	1	0	1	0	0	1	0	0	1	1	1
		0.764138	1	0	0	1	0	0	1	1	1	1	1	1	1	0	0	1	1	1	1		0	1	1	1	0	0	1	0	1	1	0	1	0	1	1	1	0	0	0
		0.756197	0	0	1	1	0	0	1	0	1	0	0	1	1	1	1	1	1	1	1		1	0	1	0	0	0	0	0	1	0	1	0	1	0	1	1	0	0	0
		0.748136	0	1	1	0	1	1	0	1	0	1	1	1	1	1	0	0	0	0	0		1	0	0	1	1	1	0	1	0	1	0	0	1	0	0	0	1	0	1
		0.739957	1	1	0	0	1	1	0	0	1	1	0	0	0	1	1	0	1	0	1		0	1	0	0	1	1	0	0	0	1	1	1	1	0	1	1	1	1	0
		0.731661	1	0	1	1	0	0	0	0	0	0	1	1	0	0	1	0	0	1	0		1	1	1	1	0	1	1	1	1	0	0	1	1	1	0	1	1	1	1
		0.723249	0	0	0	1	1	1	1	0	0	0	1	1	0	0	0	1	1	0	0		0	1	1	1	0	0	1	1	0	0	1	0	0	1	1	0	0	0	0
		0.714723	0	1	1	0	0	1	1	1	1	0	0	0	0	0	0	0	1	0	1		0	0	0	0	0	1	0	1	1	0	0	0	0	0	1	1	0	1	0
		0.706085	0	0	0	1	0	1	1	1	1	0	1	0	1	1	1	1	0	0	1		0	0	0	1	1	0	0	0	0	1	1	1	0	1	1	0	1	1	1
		0.697335	1	1	0	0	1	0	0	1	0	0	0	0	0	0	1	0	0	1	0		1	1	1	0	1	0	1	1	1	1	0	1	1	0	0	1	1	0	1
		0.688474	1	0	0	0	0	0	1	0	0	1	0	0	1	0	0	0	0	1	1		0	0	1	0	1	0	0	0	1	1	0	1	0	1	0	1	0	1	0
		0.679506	1	0	1	0	1	1	0	0	1	1	0	1	1	1	0	1	1	1	1		1	1	0	0	0	0	1	1	0	0	1	1	1	0	1	0	0	0	1
		0.670429	0	0	1	1	1	0	0	1	1	0	0	1	1	1	1	1	1	0	0		1	0	1	1	1	1	1	1	0	1	1	0	1	1	1	0	1	1	1
		0.661247	0	1	1	0	0	0	0	0	1	1	1	0	1	0	0	0	0	0	0		1	1	0	1	0	1	0	0	0	0	1	0	1	0	0	1	0	1	0
		0.651961	0	1	0	1	0	1	0	0	0	1	1	0	0	0	1	0	0	0	1		1	0	0	0	1	1	1	1	1	0	0	1	1	1	0	1	0	0	0
		0.642571	1	1	1	0	0	1	1	1	1	0	1	0	0	0	0	1	1	1	0		0	1	1	1	0	0	0	1	1	1	1	0	0	1	0	0	0	0	0
		0.63308	1	0	0	0	1	1	1	0	0	0	0	1	1	1	0	0	1	1	1		1	0	1	0	1	1	1	0	1	0	0	0	0	0	0	1	1	1	1
		0.623489	0	1	1	1	1	0	1	1	0	0	0	1	1	1	1	1	0	0	1		0	1	0	1	0	0	0	0	0	1	0	0	1	0	1	0	1	0	1
		0.6138	0	0	0	1	1	0	0	0	0	1	1	1	0	1	1	1	0	0	0		1	0	1	1	0	1	0	0	1	1	0	1	0	1	0	0	1	1	1
		0.604014	1	1	0	0	0	0	0	1	1	1	1	1	1	0	0	0	0	0	0		0	1	1	1	1	1	0	1	0	1	0	1	0	1	1	1	0	1	0
		0.594132	1	1	0	1	0	0	1	1	1	0	1	0	0	0	0	0	0	1	0		0	0	1	0	0	0	1	1	1	0	1	1	1	0	1	0	1	0	1
		0.584156	1	0	1	1	1	1	0	0	1	1	0	1	0	0	0	1	1	1	1		1	0	1	0	1	1	1	1	0	0	1	0	1	1	1	0	1	1	0
		0.574089	0	0	1	0	0	1	0	1	0	0	0	0	0	1	1	1	1	0	0		1	0	0	0	1	0	0	0	0	1	1	1	0	1	0	1	1	1	0
		0.56393	1	1	1	0	1	1	1	0	0	1	0	0	0	1	1	1	0	1	0		0	1	0	1	1	1	1	0	1	1	0	1	1	0	1	1	0	0	1
		0.553683	0	1	0	1	0	0	0	0	0	1	1	0	1	1	0	0	1	0	1		0	1	0	1	0	0	1	0	0	0	1	0	0	0	0	0	0	0	0
		0.543348	0	0	1	0	0	1	1	1	1	0	1	1	1	0	0	0	0	1	1		0	0	1	0	0	0	1	0	1	0	0	1	1	0	1	0	0	0	1
		0.532927	1	0	0	0	0	0	1	0	1	1	0	1	0	0	0	0	1	0	0		1	1	1	0	1	1	0	0	0	0	1	0	1	1	1	0	1	1	0
		0.522422	0	0	0	0	0	0	0	1	1	0	0	1	0	1	1	1	0	1	0		1	0	0	1	1	1	1	1	1	0	1	1	0	1	0	1	0	1	1
		0.511835	1	1	1	1	1	0	0	1	0	0	0	0	1	1	1	0	1	0	0		0	1	0	0	0	1	0	1	1	1	0	1	0	0	1	1	1	1	0
		0.501167	0	1	0	1	1	0	0	0	1	0	0	0	0	1	1	0	0	1	1		1	0	1	0	0	0	1	1	0	1	1	0	1	0	0	1	0	0	1
		0.490419	1	0	1	0	0	1	1	0	0	1	1	0	1	0	0	1	1	1	1		1	1	0	0	1	0	0	0	0	0	1	0	1	0	0	0	1	0	0
		0.479595	0	0	0	0	1	1	1	0	0	0	0	0	1	0	1	1	1	0	1		0	0	0	1	0	0	0	0	0	1	1	0	0	1	0	1	1	1	1
		0.468694	0	0	0	1	1	1	1	1	0	1	0	1	0	0	1	1	0	0	1		0	1	1	1	1	1	1	0	1	1	0	1	0	1	0	0	0	0	0
		0.45772	0	1	1	1	1	0	0	0	0	0	1	1	0	0	0	0	1	0	0		1	1	1	1	1	1	1	1	1	0	0	1	0	1	1	1	0	0	0
		0.446673	1	1	0	0	0	1	1	1	0	1	1	0	0	1	0	0	0	1	0		0	0	1	0	0	0	1	1	1	1	0	0	1	0	1	0	1	1	0
		0.435556	0	1	1	1	0	0	0	1	1	1	1	1	1	0	0	0	0	1	1		0	0	0	0	0	1	0	1	0	0	1	0	1	0	1	1	1	1	1
		0.424369	1	0	1	0	0	0	0	0	1	0	1	0	1	1	0	1	0	0	0		1	1	0	0	0	0	0	0	0	0	1	0	1	1	0	1	1	1	1
		0.413116	0	1	0	1	1	0	0	1	1	0	0	0	1	0	1	0	0	0	0		0	1	1	1	1	1	1	0	1	1	0	1	0	0	0	0	0	0	1
		0.401798	1	0	0	1	1	0	0	0	0	1	1	1	0	0	1	1	1	0	0		1	0	1	1	0	0	1	1	1	0	1	1	0	0	1	0	1	0	0
		0.390416	0	0	0	0	0	1	0	0	1	0	0	0	0	1	1	0	1	1	1		1	0	1	0	1	1	0	1	0	1	1	1	0	1	1	0	0	1	1
		0.378973	1	0	1	1	0	0	1	0	0	0	1	1	0	0	0	1	1	1	1		1	1	0	1	1	0	0	0	0	1	0	0	1	0	0	1	0	0	0
		0.367469	1	0	1	0	0	1	1	0	1	0	0	1	0	1	0	1	1	1	0		1	1	0	1	1	1	0	1	0	1	0	1	1	1	1	1	0	0	0
		0.355908	0	1	0	0	0	1	1	1	0	1	1	0	1	1	0	0	0	0	0		0	1	0	0	0	0	1	1	0	0	1	0	0	1	0	1	1	0	0
		0.344291	0	1	0	0	1	0	1	1	1	1	0	0	1	0	1	0	0	0	0		0	0	1	0	0	1	1	0	1	0	0	0	1	0	0	0	1	1	1
		0.332619	1	0	0	0	1	1	0	1	0	0	0	0	0	0	0	0	0	1	1		0	0	0	0	0	1	0	0	1	1	0	0	0	0	0	0	0	1	1
		0.320894	0	1	1	1	0	0	0	0	0	0	0	1	1	0	0	1	1	1	1		1	0	1	1	1	0	0	1	0	1	1	1	0	0	0	0	0	0	0
		0.309119	0	0	1	1	1	0	0	0	0	0	0	0	1	1	1	1	0	0	1		0	1	0	1	0	0	0	0	1	0	0	1	0	1	1	1	1	1	0
		0.297295	0	1	1	1	1	1	1	1	1	1	1	0	1	1	1	1	0	0	0		1	1	1	1	0	0	1	0	1	0	1	1	1	1	1	1	0	0	0
		0.285425	0	0	0	0	0	0	0	0	0	1	1	0	0	0	0	0	1	0	0		0	0	1	0	1	0	1	1	0	0	1	0	1	0	1	1	0	0	1
		0.273509	1	1	0	0	0	1	1	0	1	0	0	1	0	0	0	0	1	1	0		1	0	0	0	1	0	1	0	0	1	0	0	0	1	0	0	1	1	1
		0.261549	1	0	0	1	1	0	1	0	1	1	0	1	0	1	0	0	0	1	0		1	1	0	1	0	1	0	0	1	1	0	1	0	0	0	0	0	1	1
		0.249549	0	0	0	1	1	0	0	1	0	0	0	1	0	0	1	1	0	0	1		0	1	0	0	0	1	1	0	1	0	0	0	0	1	1	0	1	1	1
		0.237509	0	1	1	0	0	0	0	1	0	1	1	0	0	0	0	1	0	0	1		0	0	1	0	0	0	0	0	0	0	1	1	1	0	1	0	0	0	0
		0.225432	0	0	0	0	0	1	0	1	1	0	1	0	0	0	1	0	0	0	0		0	0	1	0	1	1	1	1	0	0	1	0	1	0	1	0	1	1	1
		0.213319	1	0	1	0	0	0	1	0	0	0	0	1	1	1	0	1	1	1	0		1	0	0	1	1	1	0	0	0	1	1	1	1	1	0	1	1	0	0
		0.201172	1	0	1	1	0	0	0	0	0	0	1	0	1	0	1	0	1	0	1		0	0	1	1	1	0	1	1	1	1	0	1	0	1	0	1	0	1	0
		0.188994	0	1	1	0	0	0	1	0	0	0	0	0	1	1	1	0	1	0	1		1	1	0	1	0	0	1	1	1	0	1	0	1	1	0	1	1	0	0
		0.176786	0	1	0	1	1	1	0	1	0	1	1	1	0	1	0	0	0	0	0		0	0	0	0	1	0	0	1	1	1	0	0	1	0	1	0	0	1	1
		0.16455	1	1	0	0	1	0	0	1	1	1	0	0	0	1	0	0	0	1	0		0	1	0	0	1	0	0	0	0	1	0	0	0	0	1	1	1	0	1
		0.152288	1	0	0	1	0	1	1	1	0	0	0	1	0	0	0	0	0	1	0		1	1	1	0	1	1	0	0	1	0	1	1	0	1	0	0	0	0	0
		0.140001	1	0	0	1	1	1	0	0	1	1	0	0	1	0	0	1	1	1	1		0	1	1	1	0	0	0	0	0	0	0	1	0	0	1	1	1	1	0
		0.127693	0	0	1	0	0	0	0	0	1	0	1	0	1	0	1	1	1	0	1		1	0	0	0	0	1	0	1	1	0	1	1	1	0	0	1	0	0	0
		0.115365	0	0	0	0	0	0	1	1	0	1	1	0	0	1	1	1	0	0	0		1	0	0	1	0	1	1	1	0	1	0	0	1	1	1	0	0	1	1
		0.103018	1	1	1	0	1	1	0	0	0	0	0	0	0	0	1	0	1	0	0		1	0	0	0	1	1	0	0	0	1	0	0	1	0	0	0	1	0	1
		0.0906551	0	1	0	0	0	1	1	0	1	1	1	1	0	0	0	1	0	0	1		1	0	1	1	0	0	1	0	1	0	0	0	0	1	0	1	0	1	1
		0.0782779	0	0	0	0	1	0	1	0	0	0	0	1	0	0	0	0	0	1	0		0	1	1	0	0	0	0	1	0	0	1	0	0	1	0	0	1	0	0
		0.0658883	0	1	1	1	0	0	1	0	1	0	0	1	1	1	0	0	0	0	1		0	0	1	0	1	0	0	1	0	0	1	1	1	0	1	0	1	1	1
		0.0534883	0	0	1	0	0	0	0	1	0	0	0	0	1	1	1	1	0	1	0		0	1	0	1	1	1	1	0	0	1	0	0	0	1	1	0	0	0	1
		0.0410799	1	0	0	1	1	1	0	1	1	1	1	1	0	0	1	0	1	1	1		1	1	0	1	0	1	0	0	1	1	0	1	0	0	0	1	0	0	0
		0.0286649	1	1	1	1	0	0	0	1	1	1	1	0	1	0	0	0	1	1	0		0	1	0	1	0	1	1	1	1	1	0	1	0	0	1	0	0	0	0
		0.0162455	1	0	1	0	1	1	1	0	0	0	0	0	0	0	1	0	0	0	0		1	0	1	0	0	0	1	0	0	0	0	1	1	0	0	1	1	0	0
		0.00382342	0	0	0	0	1	1	1	0	0	0	1	1	1	0	0	1	0	0	1		1	1	1	0	1	1	0	1	1	1	1	0	1	1	0	0	1	1	0
		-0.00859921	0	1	0	0	1	0	0	1	0	0	0	0	0	1	0	0	0	1	0		0	0	0	0	1	0	0	0	0	0	1	0	1	1	0	1	1	1	0
		-0.0210205	0	1	0	0	0	0	0	0	0	0	0	0	0	1	1	1	1	1	1		0	0	1	0	1	0	1	1	1	0	1	1	0	1	1	1	0	1	1
		-0.0334384	1	0	1	1	0	0	0	0	0	0	0	1	0	0	0	0	1	0	0		0	1	0	1	0	0	1	1	0	0	0	0	0	0	1	0	0	0	0
		-0.0458511	1	0	1	1	0	1	0	0	1	0	0	1	1	1	0	0	0	0	0		0	0	0	0	0	1	0	1	1	1	1	0	0	0	1	0	0	0	1
		-0.0582565	0	0	0	0	0	0	1	1	0	0	0	0	0	0	1	1	0	0	0		1	0	1	1	0	1	0	0	0	1	0	0	1	0	0	0	1	0	1
		-0.0706528	0	1	0	1	0	0	1	1	1	1	1	0	1	1	0	0	1	0	0		1	0	0	1	1	0	0	0	1	0	0	1	1	1	0	1	1	1	0
		-0.0830379	0	1	0	0	0	0	0	0	1	1	1	0	0	0	0	1	0	0	1		0	1	0	1	0	1	1	0	0	0	0	1	0	0	0	1	0	1	0
		-0.0954098	0	0	0	1	1	1	1	1	0	1	1	1	1	0	0	0	1	1	1		1	0	0	1	0	0	1	0	0	0	1	0	1	0	0	1	0	0	0
		-0.107767	1	1	1	0	1	1	1	0	0	0	0	1	1	0	1	0	1	1	0		0	1	1	0	0	0	1	1	1	0	1	0	0	1	1	0	1	1	1
		-0.120107	1	0	1	1	1	1	0	1	0	1	1	0	0	1	1	0	0	0	1		1	1	0	0	1	1	0	0	0	1	0	0	0	1	1	0	1	0	1
		-0.132428	0	0	0	0	0	0	0	0	1	0	1	0	0	1	1	1	0	1	0		0	1	1	0	1	0	0	1	1	1	0	1	0	0	0	0	0	0	1
		-0.144728	1	0	1	1	0	0	0	0	1	1	0	0	0	0	0	0	0	0	0		0	0	1	0	0	0	0	0	0	0	0	1	0	1	1	0	0	0	0
		-0.157005	0	1	0	0	0	0	0	0	0	0	0	0	0	0	0	1	0	0	1		0	0	0	0	0	0	0	1	0	1	1	0	1	0	0	1	0	1	0
		-0.169257	1	0	0	0	1	0	0	1	1	1	0	1	1	0	0	1	0	0	0		0	0	0	0	1	1	1	0	0	0	1	1	1	0	0	0	1	0	1
		-0.181483	0	0	1	0	0	0	1	1	0	0	0	1	0	0	0	1	0	0	0		0	0	0	1	1	1	0	1	1	0	0	0	0	0	0	1	1	0	0
		-0.19368	1	0	0	0	0	0	0	0	0	0	1	0	1	1	0	0	1	1	0		1	1	1	1	1	0	1	0	1	1	0	0	0	0	1	1	0	1	0
		-0.205846	0	1	0	1	1	1	1	0	1	0	0	0	0	0	0	0	1	0	1		1	0	1	1	0	0	0	0	0	0	1	0	0	0	1	0	0	0	1
		-0.21798	0	1	0	1	0	1	0	0	1	1	1	0	1	1	1	0	0	1	0		0	1	0	0	0	0	0	0	1	1	1	0	0	1	0	0	0	1	1
		-0.230079	0	0	1	0	1	1	1	0	0	0	0	0	1	0	1	0	0	0	1		1	1	0	0	0	1	0	0	0	0	1	1	1	1	0	0	1	1	0
		-0.242142	1	1	1	0	1	0	1	0	0	1	1	0	0	0	0	0	0	1	1		1	0	0	0	1	1	0	1	1	1	0	1	1	1	0	0	0	0	1
		-0.254167	0	0	0	1	0	0	0	1	0	1	0	0	0	1	0	0	1	0	0		0	0	1	0	0	0	1	1	0	0	0	1	0	0	1	1	1	0	0
		-0.266152	0	0	1	0	0	1	0	1	0	0	0	1	0	0	1	1	1	0	1		1	0	1	0	0	0	1	0	0	1	0	0	1	0	1	0	0	0	0
		-0.278095	0	0	0	0	1	1	0	0	0	0	0	1	0	1	0	1	1	0	0		0	0	0	1	0	1	1	1	1	0	0	0	0	0	0	1	0	1	0
		-0.289994	0	0	0	0	0	0	0	1	1	0	0	1	0	1	1	0	0	1	0		0	1	0	1	1	0	0	0	0	0	1	1	1	0	0	0	1	0	1
		-0.301847	0	0	0	0	0	0	0	0	0	0	0	0	0	0	0	0	0	0	0		0	1	1	1	1	0	1	0	1	0	0	0	0	1	1	0	0	1	0
		-0.313652	1	1	0	0	0	0	1	0	1	0	1	0	0	0	1	1	0	1	0		1	0	0	0	0	0	0	1	1	0	1	1	1	0	1	1	1	0	1
		-0.325408	1	1	0	1	0	0	0	0	1	0	1	1	1	0	0	0	1	1	0		1	0	0	1	1	0	0	0	0	1	1	0	0	1	0	0	0	1	0
		-0.337112	1	0	1	1	0	1	1	0	0	1	0	0	1	0	1	1	1	0	1		0	0	0	0	0	1	0	0	0	1	0	0	0	1	1	1	1	1	0
		-0.348763	0	1	1	0	1	1	1	0	0	0	0	0	1	1	0	1	0	0	1		0	0	1	0	0	1	1	1	0	1	0	0	0	1	0	1	0	0	0
		-0.36036	0	1	0	1	1	0	0	1	0	1	1	1	0	1	0	0	0	0	0		1	1	0	0	0	1	1	1	1	0	0	1	0	0	0	0	0	0	0
		-0.371899	0	0	0	0	1	0	1	1	0	1	0	0	0	0	1	0	0	0	1		0	0	1	1	1	0	0	0	1	0	0	1	1	0	0	0	0	1	1
		-0.383379	0	0	1	1	0	1	0	1	1	1	0	1	0	0	0	1	1	1	1		0	1	1	0	0	1	0	0	0	1	1	0	1	0	1	0	1	0	1
		-0.394799	1	0	1	0	0	0	0	0	1	0	0	1	1	0	1	0	1	0	0		0	1	0	1	0	0	0	0	0	0	1	0	1	0	1	0	0	0	0
		-0.406157	1	0	0	1	0	0	0	0	0	0	1	0	1	1	0	0	0	1	0		0	1	0	0	1	0	1	1	0	0	0	0	0	1	0	1	1	0	0
		-0.41745	0	0	0	0	1	0	0	0	1	0	1	0	0	1	0	0	0	0	0		0	0	0	0	0	0	1	0	0	0	1	1	0	0	1	1	0	1	0
		-0.428678	1	1	0	0	0	0	0	1	0	0	0	0	0	0	0	0	0	0	0		1	0	1	0	1	1	1	0	1	1	0	0	1	1	1	0	0	0	1
		-0.439838	1	1	0	0	1	1	1	0	0	0	0	0	0	0	0	0	0	1	0		1	0	0	1	1	0	0	0	0	1	0	1	0	1	0	1	1	0	1
		-0.450928	0	0	1	1	0	1	0	0	0	0	0	0	0	1	1	0	1	0	1		1	1	1	0	0	1	0	1	1	1	0	0	0	0	0	1	0	1	0
		-0.461947	0	0	0	1	0	0	0	1	0	1	0	1	0	1	1	1	1	0	1		0	1	0	0	0	0	1	1	1	1	0	0	0	0	0	0	0	0	0
		-0.472894	0	1	0	0	0	1	1	0	1	1	0	1	1	0	0	1	0	1	0		0	0	1	0	0	0	0	0	0	0	1	0	0	0	0	0	1	1	0
		-0.483765	0	1	1	0	0	0	0	0	1	0	1	0	0	0	0	0	1	1	0		0	0	0	1	1	0	0	0	0	0	1	0	1	1	0	0	1	0	1
		-0.49456	0	0	0	0	0	1	1	0	1	0	1	1	1	0	0	1	0	0	0		0	0	1	1	0	1	0	0	0	0	1	1	1	1	0	1	0	0	1
		-0.505278	0	1	0	0	1	0	1	0	0	0	0	1	1	0	1	0	0	0	1		0	1	0	1	0	1	1	1	0	0	0	1	0	0	0	1	0	1	0
		-0.515915	0	0	1	0	1	0	0	1	0	1	0	0	1	0	1	0	0	0	1		1	1	0	0	0	0	1	1	1	0	0	1	0	0	1	0	0	0	1
		-0.526471	1	0	1	0	0	0	0	1	0	0	0	0	0	1	1	0	1	1	0		1	0	0	1	1	1	1	0	1	1	0	0	0	0	1	0	0	1	0
		-0.536943	1	0	0	0	0	1	0	1	0	1	1	0	0	1	0	1	0	0	1		0	1	0	0	1	0	0	0	0	1	0	0	0	1	1	0	1	0	0
		-0.547331	1	0	1	1	0	0	0	0	0	1	1	0	0	0	0	0	0	0	0		0	0	1	0	0	0	0	0	1	0	0	0	1	1	0	0	1	1	0
		-0.557633	0	0	1	1	1	0	1	1	1	0	0	1	0	1	0	1	1	0	0		0	0	1	0	0	0	0	1	0	0	1	0	0	0	1	1	0	0	0
		-0.567846	0	1	0	1	1	0	1	0	0	0	0	1	0	0	0	1	0	0	0		1	0	0	0	0	0	0	1	0	0	1	0	1	0	0	1	1	0	1
		-0.57797	0	1	0	0	0	0	0	0	1	0	1	0	0	0	0	0	1	0	0		1	0	0	1	1	1	1	1	0	0	0	1	1	0	0	0	1	1	1
		-0.588002	0	1	0	0	0	0	1	1	1	0	1	0	1	0	0	0	0	1	0		0	1	0	1	1	1	0	0	0	0	0	1	0	0	0	0	0	1	0
		-0.597942	1	1	0	0	0	1	0	0	0	1	0	0	1	1	0	1	0	1	1		1	0	1	1	0	0	1	0	1	1	0	1	0	1	0	0	0	0	0
		-0.607787	1	0	0	1	1	1	0	0	0	0	0	1	0	0	1	0	0	0	1		0	0	1	0	0	0	1	0	1	0	1	0	1	0	1	0	0	0	0
		-0.617536	0	0	0	1	1	1	0	0	0	1	0	0	0	0	1	0	0	0	0		1	0	1	0	1	0	0	0	1	1	1	0	0	1	1	0	0	0	1
		-0.627188	1	0	0	0	0	0	1	0	0	0	0	0	0	0	1	0	0	1	0		1	1	0	1	1	1	0	0	0	1	1	0	0	0	0	1	1	0	0
		-0.636741	0	0	1	0	0	1	0	0	0	0	0	1	0	0	0	0	0	1	1		0	1	0	1	0	0	1	1	0	0	0	0	0	0	0	1	0	0	0
		-0.646193	0	0	1	0	1	0	0	0	1	0	1	0	1	1	0	0	1	0	1		0	1	1	0	0	1	0	1	0	0	0	1	0	0	1	1	0	0	0
		-0.655543	0	1	1	1	1	0	0	0	1	0	0	0	1	1	1	0	1	0	0		0	0	0	0	0	0	0	1	0	0	0	1	1	0	1	1	0	1	1
		-0.66479	0	1	1	1	0	0	0	1	0	1	1	1	1	1	1	1	0	1	0		1	0	0	0	1	1	0	0	1	1	0	0	1	1	0	0	1	1	1
		-0.673931	1	0	0	0	0	0	0	1	1	1	0	0	0	0	0	1	1	0	0		0	0	0	0	0	1	0	0	0	1	0	0	0	1	0	0	1	1	1
		-0.682966	1	0	0	1	0	0	1	1	1	1	1	1	0	0	0	0	0	0	0		0	0	0	1	1	0	1	0	1	1	0	0	1	0	0	0	0	1	0
		-0.691894	0	0	0	0	0	1	1	0	0	0	1	0	0	0	0	1	0	0	0		0	1	0	1	0	0	1	1	0	0	1	0	0	1	0	0	0	0	0
		-0.700712	1	0	0	0	0	0	1	1	0	0	0	0	0	0	0	1	0	0	1		0	0	1	0	0	0	1	0	1	0	1	0	1	0	1	1	1	0	0
		-0.709419	0	0	0	0	0	0	0	0	0	0	0	0	0	1	1	1	0	0	0		0	1	0	0	0	0	0	0	0	0	1	1	0	1	1	0	1	0	0
		-0.718015	0	0	0	0	1	0	0	0	0	1	0	0	0	0	1	0	0	0	1		1	0	1	0	1	1	0	1	1	0	0	1	0	0	0	1	1	1	1
		-0.726497	0	1	1	0	0	1	0	1	1	0	0	0	1	0	0	0	1	0	1		0	1	1	1	1	1	0	0	0	1	0	1	0	0	1	0	0	0	0
		-0.734864	0	0	1	1	1	1	0	0	1	0	0	0	1	1	0	0	1	1	0		1	0	0	0	0	0	0	1	0	0	0	0	0	0	0	0	0	0	1
		-0.743115	1	1	0	1	0	1	0	1	0	0	0	1	1	0	0	0	0	0	0		1	1	0	1	0	0	1	0	0	1	1	0	1	1	1	0	0	0	1
		-0.751249	0	1	1	0	1	0	1	0	0	1	1	1	0	1	1	0	1	1	0		0	0	0	0	1	0	0	0	0	0	1	0	1	0	0	1	0	1	0
		-0.759264	1	0	0	0	1	0	0	0	0	1	1	1	0	0	0	0	0	1	1		0	0	0	0	1	1	0	1	0	0	0	1	0	1	0	0	0	1	1
		-0.76716	1	0	0	0	0	0	1	0	0	1	0	0	0	0	0	1	0	1	0		1	0	1	1	0	0	1	0	1	1	1	1	0	0	0	0	1	0	0
		-0.774934	0	0	0	1	0	0	1	0	1	0	0	1	1	0	1	1	0	0	0		0	0	1	0	0	0	1	0	1	0	0	0	0	1	1	1	1	0	0
		-0.782586	0	1	1	0	0	0	0	0	0	0	0	1	0	0	0	0	0	0	1		0	0	1	1	0	1	0	0	1	1	0	0	1	0	1	0	0	1	0
		-0.790114	0	1	1	1	0	0	1	0	1	0	0	0	1	1	1	0	0	0	0		1	1	0	0	0	1	0	0	0	0	0	0	1	0	0	1	0	0	0
		-0.797517	1	0	0	0	0	0	0	0	1	0	0	0	0	1	0	0	1	0	1		0	1	1	0	1	1	0	1	0	1	0	1	0	0	0	1	0	0	0
		-0.804795	1	0	1	1	0	1	1	1	0	1	1	0	1	1	0	1	1	0	0		1	0	0	0	0	0	1	1	0	0	0	1	1	0	0	0	0	0	1
		-0.811945	0	0	0	0	1	1	0	0	0	0	1	0	0	0	0	1	1	0	0		0	0	0	0	1	0	1	1	1	0	1	0	0	0	1	0	0	0	1
		-0.818968	0	0	0	0	1	1	0	1	0	1	0	1	0	0	0	0	0	0	0		1	1	0	0	1	0	0	0	0	0	1	0	0	1	0	0	1	1	0
		-0.825861	0	0	0	0	0	0	0	1	0	0	0	0	0	1	0	0	0	1	0		0	1	0	1	0	1	0	0	0	1	0	0	0	1	1	0	0	1	0
		-0.832623	0	1	0	0	1	0	0	1	0	0	1	0	0	0	0	0	0	1	1		0	0	0	1	0	0	0	0	0	1	1	1	1	1	0	0	1	0	0
		-0.839254	0	1	0	1	0	1	0	0	0	0	1	0	0	0	0	0	0	1	1		0	0	1	0	0	1	1	0	1	0	0	0	0	0	0	0	1	1	0
		-0.845753	0	1	0	0	0	0	1	1	1	0	0	0	0	0	1	0	1	0	0		0	0	1	0	0	0	1	0	1	1	1	1	0	0	0	0	0	0	1
		-0.852118	0	0	1	1	0	1	1	0	0	1	0	1	1	0	1	1	0	0	1		0	0	0	0	0	0	0	0	0	1	0	0	1	0	0	1	0	0	1
		-0.858348	1	0	1	0	0	0	0	0	1	1	0	1	1	1	1	1	1	1	0		1	0	1	0	1	0	0	1	0	0	0	0	0	1	1	1	0	0	0
		-0.864443	1	1	0	0	0	1	0	0	0	0	0	0	0	0	0	0	1	0	1		0	0	0	1	0	0	0	1	0	0	0	0	1	0	1	1	0	0	1
		-0.870401	1	1	0	0	1	0	0	0	0	0	1	0	1	0	1	1	0	1	0		0	1	0	0	1	1	1	1	1	0	1	0	0	1	0	0	1	1	1
		-0.876222	0	0	1	1	1	0	1	0	1	0	0	1	0	0	0	0	0	0	0		1	1	0	1	1	0	0	0	0	0	1	0	0	0	1	0	1	1	0
		-0.881905	0	0	1	0	0	0	0	0	0	0	1	1	1	1	0	0	0	0	0		0	0	0	1	0	0	1	0	1	0	0	0	1	0	0	1	0	1	0
		-0.887448	0	0	0	0	1	0	0	0	0	0	0	0	0	0	0	0	0	1	0		1	0	1	0	0	0	0	0	0	1	0	1	0	0	0	1	1	0	0
		-0.892851	0	0	0	0	0	0	1	1	1	1	0	0	0	1	1	0	1	0	0		1	0	1	0	0	0	1	0	0	0	1	0	0	0	0	0	0	0	0
		-0.898113	1	0	0	0	0	0	0	0	0	0	1	0	1	0	0	1	0	0	1		1	1	0	1	1	1	0	0	0	1	0	1	1	1	0	1	0	1	1
		-0.903234	1	0	0	1	0	0	1	1	1	1	0	0	0	1	1	1	1	0	1		0	1	0	0	1	1	0	1	1	1	0	1	1	1	0	0	1	0	1
		-0.908211	0	0	1	1	1	1	0	1	0	0	1	0	0	0	1	0	0	0	1		0	0	0	0	0	1	0	1	0	0	0	1	0	1	1	0	0	0	0
		-0.913046	1	1	0	0	1	1	0	0	0	0	0	0	0	0	0	0	1	0	0		0	0	1	0	0	0	0	1	0	0	0	1	1	0	1	0	1	0	0
		-0.917736	0	1	1	0	0	0	0	0	1	0	0	0	0	0	0	1	0	1	0		0	0	1	0	0	0	0	0	0	0	0	0	0	0	1	0	0	1	0
		-0.922281	0	1	0	0	0	1	0	0	0	0	0	1	0	0	0	0	0	1	0		1	1	0	1	1	0	0	0	0	0	0	0	0	0	0	0	0	1	1
		-0.92668	0	0	0	1	0	1	1	1	1	1	0	1	0	0	0	0	0	0	1		0	1	0	1	0	0	1	0	1	1	0	0	0	0	0	0	0	0	0
		-0.930934	0	1	1	1	0	0	1	1	0	1	1	1	1	1	0	0	0	1	0		1	1	0	1	0	1	1	0	1	1	1	1	0	1	0	1	0	0	0
		-0.93504	0	0	0	0	0	1	0	0	1	1	1	0	1	1	0	0	0	0	1		0	0	1	0	0	0	1	1	1	0	1	0	0	0	0	1	1	0	0
		-0.938998	1	0	1	1	0	0	0	0	0	0	1	1	0	1	0	1	1	1	0		0	0	0	0	0	1	0	1	0	0	1	0	0	1	1	0	1	0	1
		-0.942809	1	1	0	0	1	0	1	0	0	0	0	0	1	0	1	1	1	1	0		0	0	1	0	1	1	0	0	0	0	1	0	1	0	0	1	0	0	1
		-0.94647	0	0	0	1	1	0	0	0	0	0	0	0	1	0	1	0	1	0	0		0	0	0	1	1	1	0	0	0	1	0	1	1	1	1	1	0	1	0
		-0.949982	0	1	0	0	0	1	0	1	0	0	0	1	0	0	1	0	0	0	0		1	0	0	1	0	0	0	0	0	0	0	1	0	0	0	0	0	0	0
		-0.953344	1	0	0	0	0	0	0	1	0	1	0	0	0	1	0	0	1	0	0		1	1	0	0	1	0	1	1	1	0	0	0	1	0	0	0	1	1	1
		-0.956555	0	0	0	0	1	1	0	0	1	1	1	0	0	0	0	0	0	0	1		1	1	0	0	0	0	1	0	0	0	0	0	1	0	1	0	1	1	1
		-0.959616	0	0	1	0	0	0	1	1	1	0	0	1	0	1	1	1	0	0	1		0	0	0	0	0	0	0	1	1	1	0	0	0	1	0	0	0	1	0
		-0.962524	1	0	1	0	1	0	1	0	0	1	1	0	0	0	0	1	0	0	0		0	0	1	0	0	0	0	1	1	1	1	1	0	1	1	1	0	0	0
		-0.965281	1	0	1	1	0	0	0	0	1	0	0	0	1	0	0	0	0	0	1		0	0	1	0	0	1	0	0	0	0	1	0	0	0	0	1	1	0	1
		-0.967885	0	0	0	0	0	0	0	0	0	0	0	0	1	0	0	0	1	1	0		0	0	1	0	1	1	0	0	0	0	0	0	0	0	0	0	0	0	0
		-0.970337	1	1	0	1	0	0	0	0	0	0	0	0	0	0	0	1	0	1	0		1	0	0	1	0	0	0	0	0	0	0	0	1	0	0	1	0	0	0
		-0.972635	1	1	0	1	1	1	1	0	0	0	1	0	1	0	0	0	0	1	0		0	1	0	1	1	0	1	0	0	1	0	0	0	1	0	0	0	0	0
		-0.97478	0	0	1	0	0	1	1	1	0	0	0	0	0	1	1	0	1	0	1		1	0	1	1	0	0	1	0	0	0	1	1	0	0	0	0	1	0	0
		-0.976771	0	1	1	0	0	0	0	1	1	0	1	1	1	1	1	0	0	0	0		0	1	0	0	0	1	0	1	1	1	1	0	1	0	1	1	1	1	1
		-0.978607	0	1	0	0	0	0	0	1	1	1	1	0	0	1	0	0	0	0	1		0	1	0	1	0	1	1	0	1	0	0	1	1	1	1	0	0	0	1
		-0.980289	0	0	0	0	0	1	0	0	0	1	0	1	0	0	1	1	1	0	0		0	1	0	0	1	0	0	1	0	0	0	1	1	1	0	1	0	0	0
		-0.981816	0	0	0	1	1	0	0	0	0	0	0	1	0	0	0	1	1	0	0		0	0	1	0	1	0	1	0	1	0	0	1	0	0	0	0	0	0	0
		-0.983189	0	0	0	1	1	0	0	0	0	1	0	0	1	0	0	1	0	0	1		0	0	1	0	0	0	0	0	0	0	1	0	0	0	0	0	1	1	1
		-0.984406	0	1	0	0	1	1	0	0	0	1	0	0	1	0	0	0	0	1	1		1	0	0	0	1	0	0	1	0	1	0	0	0	1	1	0	1	1	0
		-0.985467	1	0	0	0	0	0	1	1	0	0	0	0	0	1	1	0	0	0	0		1	1	0	1	0	1	0	0	0	1	1	0	0	0	0	1	0	0	0
		-0.986373	1	0	1	1	0	1	1	0	1	0	0	1	0	0	0	0	0	0	1		0	1	0	0	0	1	1	1	0	1	0	0	0	0	1	0	0	0	0
		-0.987123	1	0	1	1	0	0	0	0	0	0	0	1	0	0	1	0	0	0	0		1	0	1	1	0	1	0	1	1	0	0	0	1	0	1	0	0	0	0
		-0.987717	0	0	0	0	1	0	0	1	0	0	1	0	0	0	0	0	0	1	0		1	0	1	0	1	0	0	0	1	0	1	0	1	0	0	0	0	0	1
		-0.988155	0	0	0	0	1	0	0	1	0	0	1	0	0	1	0	0	1	0	0		0	0	0	0	1	0	1	0	0	0	1	1	0	0	0	0	0	1	1
		-0.988438	0	0	0	0	0	0	0	1	1	0	1	0	0	1	0	0	1	1	0		0	0	0	0	0	0	0	0	0	0	1	1	0	1	0	0	1	1	0
		-0.988564	0	1	0	0	0	0	1	0	1	1	0	1	0	0	0	1	0	1	0		0	1	0	1	0	1	1	1	0	1	0	1	0	1	0	1	0	0	0
		-0.988534	0	1	1	0	0	1	1	0	0	0	0	1	1	0	1	1	0	0	1		0	1	0	1	0	0	1	0	1	0	0	0	0	0	1	1	1	1	0
		-0.988347	1	0	1	0	0	1	0	0	0	1	0	0	1	0	1	1	0	0	1		1	0	0	0	0	1	0	0	1	1	0	0	0	1	1	0	1	1	1
		-0.988005	0	1	0	0	1	0	0	0	1	1	1	0	1	1	1	0	0	0	0		1	0	1	0	1	0	0	0	0	1	0	1	1	0	1	0	0	0	0
		-0.987507	1	1	1	1	0	1	0	1	1	0	0	0	0	1	1	1	1	1	1		0	0	0	0	1	0	0	1	1	0	0	1	1	1	0	1	0	0	1
		-0.986853	0	0	0	1	0	0	0	0	0	1	1	1	1	0	0	0	1	1	0		0	0	0	1	1	0	0	0	0	0	1	0	0	0	0	1	0	0	0
		-0.986043	1	0	0	1	0	0	0	0	0	0	0	1	0	0	0	0	1	0	0		0	0	1	0	0	0	1	0	0	0	1	0	1	0	0	0	1	1	1
		-0.985077	0	1	0	1	0	0	1	0	0	1	1	0	0	1	0	0	0	0	0		1	1	1	1	0	1	1	1	1	0	0	0	0	0	0	0	1	1	0
		-0.983956	1	0	0	0	1	0	1	0	0	0	0	0	0	1	0	0	1	0	0		0	1	0	0	0	1	0	0	0	1	1	1	0	1	0	0	0	0	0
		-0.982679	0	0	1	0	0	1	0	0	1	0	0	0	0	1	0	0	0	0	0		1	1	1	0	0	1	1	1	1	1	0	0	1	1	0	1	0	0	0
		-0.981248	0	0	1	0	1	0	1	0	1	0	0	1	0	0	0	1	0	0	0		0	0	0	0	0	0	0	0	0	0	1	0	0	0	1	1	0	0	1
		-0.979661	0	1	0	0	1	1	1	1	0	0	0	1	0	0	0	1	0	0	1		0	0	0	0	1	0	0	1	0	1	0	0	0	0	1	0	0	1	1
		-0.97792	0	0	1	0	0	0	0	1	1	0	1	0	1	0	1	1	0	1	1		1	0	0	1	1	0	0	0	0	0	0	1	1	0	1	1	0	0	0
		-0.976024	1	1	0	0	0	0	0	1	0	1	1	0	1	0	1	0	0	1	0		0	0	1	1	1	0	0	0	0	0	0	1	0	0	0	0	0	0	0
		-0.973974	1	1	0	1	0	0	0	0	0	1	0	0	0	1	1	0	1	1	1		1	0	1	1	0	1	1	0	1	1	1	1	1	1	0	0	1	0	0
		-0.97177	1	0	1	1	1	0	1	0	0	0	0	0	0	0	0	0	1	0	1		0	1	1	0	0	0	1	0	1	0	1	0	0	0	1	0	1	1	0
		-0.969413	0	1	0	0	1	1	1	1	0	0	0	1	1	1	0	1	1	0	0		0	1	0	1	1	1	0	0	0	0	0	0	0	1	1	0	1	0	1
		-0.966902	0	0	0	0	1	1	0	0	0	0	1	1	1	0	1	0	0	0	0		0	0	0	0	0	0	0	1	1	0	0	0	0	1	0	0	1	1	1
		-0.964239	0	0	0	0	0	0	0	0	1	1	1	0	0	0	0	1	0	1	0		0	0	0	0	0	0	1	1	0	0	0	0	1	0	0	1	0	0	0
		-0.961424	0	0	0	0	0	1	0	1	1	1	0	0	0	0	0	0	0	1	0		0	0	0	0	0	0	0	0	0	1	0	0	0	0	0	1	1	1	1
		-0.958457	0	0	1	1	0	0	0	0	1	0	0	1	0	0	0	0	0	0	0		1	1	1	0	0	1	0	1	0	0	0	0	0	0	0	0	0	0	0
		-0.955338	0	0	1	1	0	0	0	1	0	0	0	0	0	0	0	1	0	0	1		1	1	0	1	1	1	0	0	0	1	0	1	1	1	1	0	0	0	0
		-0.952069	0	0	1	0	1	1	1	0	1	1	0	1	1	1	0	1	0	0	0		1	1	0	0	1	0	1	1	1	0	1	1	1	0	0	1	0	1	0
		-0.94865	1	1	0	0	1	0	0	0	0	0	0	0	0	1	1	0	1	1	1		0	0	1	0	0	1	0	0	1	1	0	1	0	0	1	1	0	0	1
		-0.94508	1	1	1	0	0	1	1	0	0	0	0	0	1	1	0	0	1	1	1		1	0	1	0	0	0	0	0	1	0	1	0	1	0	1	0	1	1	1
		-0.941361	1	0	0	0	0	0	1	1	0	0	1	0	0	0	1	0	1	0	0		0	0	0	0	0	1	1	0	0	1	1	1	0	1	0	0	1	1	0
		-0.937494	0	0	0	0	1	1	1	1	0	0	0	0	0	0	0	0	1	0	0		0	0	0	1	1	0	0	0	0	0	1	0	0	1	0	0	0	0	1
		-0.933479	1	1	0	1	0	0	0	0	0	1	1	1	1	1	1	0	0	0	0		0	1	0	1	1	1	1	1	0	1	0	1	0	0	0	1	0	1	0
		-0.929316	0	1	0	0	0	0	0	1	1	1	1	0	0	0	1	0	0	0	1		0	0	0	0	0	0	1	1	1	0	1	0	1	0	0	1	0	0	1
		-0.925006	1	0	0	1	1	0	0	0	1	1	0	1	1	0	0	1	0	1	1		1	1	1	0	1	0	0	1	0	1	0	0	1	0	1	0	1	1	0
		-0.920551	0	0	0	1	0	1	0	0	0	0	1	0	0	0	0	1	1	1	1		1	1	0	1	0	0	0	0	0	0	0	0	1	1	1	0	1	0	0
		-0.91595	1	0	0	1	1	1	0	0	0	0	0	1	0	0	0	1	0	0	0		0	1	1	1	0	0	0	0	1	0	0	0	0	1	0	1	0	0	0
		-0.911204	0	0	1	0	0	0	1	0	0	0	1	0	1	0	0	0	1	1	0		0	0	0	1	0	0	0	0	1	0	0	1	0	0	1	1	0	0	1
		-0.906315	0	0	1	0	0	0	0	0	1	0	0	0	0	1	1	0	0	0	0		1	0	1	0	0	0	1	0	0	0	1	0	0	1	0	0	1	0	1
		-0.901282	0	1	0	0	0	0	1	0	1	0	1	0	1	0	0	0	0	0	0		0	0	1	0	1	1	1	1	0	1	1	0	1	0	0	0	0	1	0
		-0.896107	0	1	1	1	0	0	1	1	1	0	0	1	0	1	1	1	0	0	0		0	0	0	0	1	1	0	0	0	1	0	0	1	0	0	0	0	1	0
		-0.890791	0	0	1	1	1	1	1	1	0	1	1	1	0	1	0	1	0	0	1		0	1	0	1	1	1	1	1	1	1	0	1	0	1	0	1	0	0	0
		-0.885333	0	1	1	1	1	1	0	1	0	1	0	1	1	0	0	0	1	0	0		0	0	1	1	0	0	1	1	0	0	0	1	0	0	1	0	0	0	0
		-0.879737	0	0	0	0	0	0	0	1	0	1	0	0	0	0	1	0	1	1	1		1	1	0	0	0	1	0	0	1	0	1	0	0	0	1	0	1	0	1
		-0.874001	1	0	0	0	0	0	1	0	1	0	0	0	1	0	0	0	0	1	0		1	0	0	0	0	0	0	0	0	0	1	1	1	0	1	0	1	1	1
		-0.868127	1	1	1	0	0	1	1	0	1	0	0	0	0	0	0	1	0	1	0		0	0	0	0	1	0	0	1	1	1	0	1	1	1	0	0	0	1	0
		-0.862116	1	0	0	0	0	1	0	0	0	1	0	0	0	1	0	1	0	0	1		0	0	1	0	0	0	0	0	0	1	0	0	0	1	1	1	1	0	0
		-0.855969	0	1	0	0	0	0	0	0	0	1	1	1	0	1	1	0	1	0	0		1	0	1	0	0	0	0	1	1	0	0	0	0	0	0	1	0	1	0
		-0.849687	1	0	0	0	1	1	0	1	0	0	1	0	0	0	1	0	1	1	1		0	1	0	1	1	1	1	1	0	0	1	0	0	1	0	0	0	0	1
		-0.84327	0	0	0	1	0	0	0	0	0	0	0	1	1	1	0	0	0	0	1		0	1	0	1	1	1	0	0	0	0	1	1	0	0	0	1	1	0	1
		-0.836721	0	0	1	1	1	0	0	1	1	0	0	0	1	0	1	0	1	0	0		0	1	1	0	1	1	1	1	0	0	0	1	0	1	0	0	1	0	0
		-0.830039	1	0	0	0	1	0	0	1	0	0	0	0	1	1	0	1	0	0	0		1	0	0	0	0	0	0	0	1	0	1	1	1	0	0	0	0	1	1
		-0.823226	0	0	0	0	1	0	0	0	1	1	1	0	0	1	0	0	0	1	0		0	1	0	0	0	0	1	0	1	0	0	0	1	0	1	0	1	0	0
		-0.816283	1	1	0	0	1	1	1	0	1	1	1	0	0	0	0	1	0	1	0		1	0	0	1	0	0	1	0	1	1	0	0	1	1	1	0	0	1	0
		-0.809212	0	1	1	1	0	1	1	0	0	0	0	1	0	0	0	0	0	1	1		0	0	1	1	0	1	0	0	0	1	0	0	0	0	0	1	0	1	0
		-0.802012	0	1	1	1	0	0	1	1	0	0	0	1	0	0	0	0	1	0	1		1	0	0	1	0	1	1	1	0	1	0	0	0	0	1	1	0	0	0
		-0.794686	1	0	0	1	0	0	1	1	1	0	1	1	1	1	1	1	0	0	1		0	1	0	1	0	0	0	1	0	0	0	1	0	0	0	1	1	0	1
		-0.787234	0	1	0	0	0	0	0	0	0	1	0	0	1	1	1	0	1	0	0		1	0	1	0	1	0	0	0	0	0	1	0	1	0	0	0	0	0	1
		-0.779658	1	1	0	1	1	0	0	0	0	1	0	1	0	0	1	1	0	0	0		1	0	0	0	1	1	0	0	0	0	1	1	1	1	0	1	0	1	0
		-0.771959	0	0	1	0	0	1	1	0	0	0	1	0	1	0	0	0	1	1	0		0	0	1	0	1	0	0	1	1	1	0	1	0	1	1	0	0	1	0
		-0.764138	0	0	1	0	1	1	0	1	0	1	0	0	0	0	1	1	0	0	1		0	0	1	0	0	0	1	1	1	1	1	0	1	0	1	0	0	0	1
		-0.756197	1	1	1	0	0	0	0	1	1	1	1	0	1	0	0	0	0	0	1		1	0	1	0	1	0	1	0	0	0	1	0	0	0	0	0	1	1	0
		-0.748136	0	0	1	0	0	0	0	0	1	0	0	0	0	1	1	0	1	1	0		0	1	0	1	0	1	0	0	0	1	0	0	1	1	1	0	1	0	0
		-0.739957	1	0	0	0	1	1	1	0	0	0	0	0	0	1	0	1	1	0	0		0	1	0	1	0	1	0	1	0	1	0	1	0	1	0	1	1	0	1
		-0.731661	1	0	0	1	0	0	0	0	0	0	1	1	0	0	0	0	1	0	1		0	1	0	1	0	1	1	0	1	0	0	1	0	1	1	1	0	0	0
		-0.723249	0	0	1	1	1	1	1	0	0	0	0	1	1	1	0	1	1	1	1		1	0	0	0	0	0	1	0	1	0	1	0	1	0	1	0	0	0	1
		-0.714723	0	1	0	1	1	0	1	0	1	0	1	1	0	1	0	1	0	0	0		0	1	0	0	1	0	0	1	0	0	1	0	0	0	0	0	1	1	0
		-0.706085	0	1	0	0	0	0	0	1	1	1	1	1	0	0	1	0	0	1	0		1	0	0	1	1	0	0	0	0	1	1	1	0	0	0	1	1	1	1
		-0.697335	0	1	1	1	0	0	1	1	1	1	0	0	0	0	1	0	0	1	1		0	0	1	1	1	1	0	1	1	1	0	1	0	1	0	1	0	1	0
		-0.688474	1	0	0	0	0	1	0	0	0	1	0	0	1	0	0	0	0	1	1		1	0	1	0	0	0	0	0	1	1	0	0	0	0	0	0	0	0	1
		-0.679506	1	0	0	0	1	1	0	1	0	0	0	1	1	0	1	1	0	0	0		0	0	1	0	0	1	1	1	0	0	0	0	1	1	1	1	0	0	0
		-0.670429	0	0	0	0	1	1	0	1	0	1	0	1	0	1	0	1	0	0	0		0	1	0	0	0	0	1	0	0	0	1	0	1	0	1	0	0	0	0
		-0.661247	0	0	0	0	0	0	0	1	1	0	0	0	1	1	1	0	1	0	0		1	1	0	0	1	0	0	1	0	0	0	1	0	0	0	1	0	0	0
		-0.651961	1	0	0	1	0	0	1	0	0	0	1	0	0	1	0	0	1	1	0		0	1	1	1	1	1	1	0	1	1	0	1	0	1	1	0	1	1	0
		-0.642571	0	1	1	1	0	0	1	0	1	0	1	0	1	0	0	1	1	1	0		1	0	1	1	0	0	0	0	1	0	1	1	1	0	0	0	1	0	1
		-0.63308	0	1	1	0	0	1	1	0	0	0	0	0	0	0	1	1	0	0	1		0	1	1	0	1	1	1	1	0	1	1	0	0	1	0	0	1	1	1
		-0.623489	1	0	1	0	1	1	0	0	1	1	1	1	1	0	1	0	0	0	1		1	1	0	1	1	0	0	0	0	0	1	1	1	1	0	0	1	1	1
		-0.6138	0	1	1	1	1	0	0	0	0	1	0	0	1	0	1	1	0	0	0		0	0	0	0	0	0	1	1	1	0	0	0	0	0	0	1	0	1	0
		-0.604014	1	1	0	0	0	1	1	0	1	0	0	1	0	0	0	0	1	1	1		1	1	0	1	0	1	0	1	1	0	0	0	1	0	0	1	0	0	0
		-0.594132	1	1	0	1	1	0	1	1	0	0	1	0	0	0	0	0	1	1	1		0	0	0	0	0	0	0	0	0	0	0	0	0	0	1	1	0	1	1
		-0.584156	0	0	1	1	0	0	1	1	0	1	0	0	1	1	0	0	0	0	1		0	1	1	0	1	1	1	0	0	1	1	0	0	0	1	0	1	0	1
		-0.574089	0	1	1	0	1	0	0	1	0	1	1	1	0	1	0	0	1	0	0		0	0	0	0	1	1	0	0	0	1	0	0	1	1	0	0	1	0	0
		-0.56393	1	0	0	0	1	0	0	1	1	0	0	1	0	1	0	0	0	1	0		0	0	1	1	0	0	1	1	1	0	0	1	0	1	1	0	0	0	0
		-0.553683	1	0	0	1	0	1	1	0	1	0	1	0	0	1	0	1	0	1	0		1	0	1	1	0	0	0	1	1	0	1	0	1	0	0	1	1	0	1
		-0.543348	0	0	0	1	0	1	0	0	1	0	1	1	0	0	1	1	1	0	0		1	1	1	0	1	0	0	1	0	1	1	1	0	0	1	1	1	1	1
		-0.532927	0	0	0	0	1	1	0	0	0	1	0	1	0	1	1	1	0	0	0		1	1	0	1	0	0	0	0	0	1	0	1	1	0	1	0	0	1	0
		-0.522422	0	1	1	0	1	0	0	1	0	0	0	0	1	0	1	0	1	1	1		0	1	0	1	0	1	0	0	0	1	0	1	1	1	0	1	0	1	0
		-0.511835	0	1	1	0	0	0	1	1	1	1	0	0	0	0	1	0	0	0	0		1	0	0	0	0	1	1	0	0	0	0	1	0	1	1	0	0	0	0
		-0.501167	1	1	0	0	0	0	0	0	0	1	1	0	1	0	0	1	0	0	1		0	0	0	0	0	0	1	0	0	0	1	0	0	0	0	0	0	1	1
		-0.490419	1	0	1	1	0	0	1	0	0	0	1	0	1	0	0	0	0	0	1		0	0	1	0	1	1	1	1	1	0	1	0	1	1	0	0	1	0	1
		-0.479595	1	0	1	1	1	1	1	1	0	1	0	0	0	1	1	0	0	1	1		0	1	0	0	1	0	0	0	1	1	1	1	1	0	0	0	1	0	1
		-0.468694	0	0	0	0	1	1	0	1	1	1	1	0	1	1	0	1	1	0	0		0	0	1	0	1	1	1	1	0	1	0	0	0	1	1	1	0	0	0
		-0.45772	1	1	0	1	0	0	0	0	0	0	0	0	0	1	0	0	1	1	0		1	0	1	1	0	0	1	1	1	0	0	0	1	0	0	1	0	1	0
		-0.446673	0	1	0	0	0	1	1	0	1	0	0	1	1	0	0	1	1	0	0		1	0	0	0	0	1	0	1	1	1	1	1	0	1	1	0	0	0	0
		-0.435556	0	1	1	0	1	1	0	0	1	0	0	1	1	0	1	1	1	1	0		1	1	0	1	0	1	0	0	1	0	1	0	1	0	1	1	1	1	1
		-0.424369	0	0	1	1	0	0	1	1	0	0	0	1	0	1	1	0	0	0	1		0	1	0	1	1	0	0	1	0	1	0	1	0	1	0	0	0	1	0
		-0.413116	0	0	0	1	1	0	0	1	1	1	1	1	0	1	0	1	0	1	0		1	0	0	1	1	0	0	0	1	0	0	1	0	0	0	0	0	0	1
		-0.401798	1	1	0	0	0	1	0	1	0	1	1	0	0	0	0	0	1	0	1		1	0	1	1	0	0	1	0	0	0	0	0	1	1	1	1	1	0	0
		-0.390416	1	1	0	0	0	1	1	0	0	0	1	1	1	1	1	1	1	0	1		0	1	1	0	1	1	1	0	1	1	0	1	1	0	1	0	1	0	0
		-0.378973	1	0	1	1	0	0	1	0	0	0	0	0	1	0	1	0	0	1	1		0	1	0	0	0	1	1	0	0	1	1	0	0	0	0	1	0	1	1
		-0.367469	1	0	1	1	1	0	1	0	1	1	0	1	1	0	0	0	0	0	0		0	0	1	1	1	0	0	1	0	1	0	0	0	1	0	1	0	1	0
		-0.355908	0	0	0	0	1	0	0	0	1	1	0	1	0	1	0	0	1	1	0		1	0	1	0	1	0	1	0	0	1	1	0	0	0	0	1	1	0	1
		-0.344291	0	1	0	0	1	0	0	1	0	1	1	0	0	1	1	0	0	1	0		1	1	1	0	0	0	1	1	1	0	1	0	1	1	1	0	1	0	0
		-0.332619	0	0	0	1	0	1	0	0	1	0	1	0	1	0	0	1	0	0	1		1	1	0	0	0	1	0	0	1	0	1	1	1	0	1	0	0	0	1
		-0.320894	1	1	0	0	1	1	1	1	0	0	0	1	1	0	1	1	0	0	1		0	1	0	1	0	0	0	1	0	0	1	1	0	1	0	0	1	1	0
		-0.309119	1	0	1	1	0	0	1	1	0	1	1	1	0	1	1	1	0	0	1		1	1	0	1	1	0	0	1	1	1	0	1	1	1	1	0	0	0	1
		-0.297295	0	1	1	1	0	0	0	1	1	0	1	0	0	0	0	0	1	1	0		0	0	1	1	1	0	0	1	1	0	0	0	1	0	0	1	1	0	1
		-0.285425	1	1	0	0	0	1	1	0	1	0	0	0	0	1	1	1	1	1	1		1	1	1	0	0	1	1	0	0	1	0	0	0	1	0	0	1	1	0
		-0.273509	0	0	1	1	0	1	0	0	0	0	0	1	1	0	0	0	1	1	0		0	0	0	0	1	1	0	0	0	0	1	0	0	0	1	1	0	1	0
		-0.261549	0	0	0	0	1	0	0	0	1	0	0	0	1	1	1	0	1	0	1		0	0	0	1	1	1	1	1	1	0	0	0	1	1	0	1	0	1	0
		-0.249549	1	1	1	0	1	0	1	1	0	1	1	1	1	1	0	0	0	0	1		0	0	0	1	1	1	1	0	0	0	1	1	0	0	0	1	1	0	1
		-0.237509	0	0	1	0	1	0	0	1	1	1	1	0	0	0	1	0	0	0	0		0	1	1	0	0	0	1	1	1	0	1	0	0	1	1	0	0	0	1
		-0.225432	1	0	0	0	1	1	1	0	0	1	0	0	0	0	0	1	1	0	0		1	0	1	0	0	1	1	0	1	1	0	1	0	0	1	0	0	0	0
		-0.213319	1	1	1	1	0	1	1	1	1	0	1	0	0	0	0	1	0	1	1		0	1	0	1	1	1	0	1	0	1	0	1	0	0	0	0	0	1	1
		-0.201172	0	1	0	1	1	1	0	0	0	0	0	1	0	0	1	1	0	0	0		1	1	1	1	0	0	1	1	0	1	0	1	1	1	1	1	0	0	0
		-0.188994	1	0	0	1	0	0	0	0	0	1	1	1	1	1	0	1	0	1	0		1	0	1	0	0	0	0	0	0	0	1	0	1	0	0	1	1	1	1
		-0.176786	0	1	1	0	0	0	1	0	1	1	1	1	1	0	0	0	1	1	0		1	1	0	0	1	0	1	1	1	1	1	0	1	1	1	0	1	1	1
		-0.16455	1	0	0	0	1	1	0	0	0	0	0	0	0	1	1	0	1	0	1		0	0	0	0	1	1	0	0	0	1	1	1	0	1	0	0	1	1	1
		-0.152288	0	1	1	1	0	0	0	1	0	0	0	1	1	0	0	1	1	1	0		0	0	1	0	0	1	1	0	1	0	0	1	0	0	0	1	0	1	0
		-0.140001	0	0	1	1	1	0	1	1	0	1	0	1	0	1	1	1	1	0	1		0	0	1	1	0	0	0	0	1	0	0	1	1	0	1	1	1	0	0
		-0.127693	1	0	0	0	0	1	1	1	1	1	1	0	1	1	1	0	0	1	0		1	1	1	1	0	0	0	1	0	0	0	0	1	0	1	1	0	1	0
		-0.115365	0	1	0	0	0	0	0	1	1	0	1	0	1	1	1	1	1	0	0		1	1	0	0	1	1	1	1	1	1	1	1	1	1	1	0	1	0	1
		-0.103018	1	1	0	0	1	1	0	0	0	0	0	0	0	0	0	0	0	0	1		1	1	0	1	1	1	0	0	0	1	0	0	0	1	0	0	1	0	1
		-0.0906551	0	0	1	1	0	1	1	1	0	0	0	0	1	0	1	0	0	1	1		0	0	0	1	1	1	0	1	1	1	1	0	0	1	0	0	0	0	0
		-0.0782779	1	1	1	1	1	0	1	0	0	0	0	1	0	0	0	1	0	0	0		0	1	1	0	0	0	0	1	0	0	1	0	0	0	1	0	1	0	0
		chirp phase 2
		Stimulus	Neuron 1																				Neuron 2
			Trial 1	Trial 2	Trial 3	Trial 4	Trial 5	Trial 6	Trial 7	Trial 8	Trial 9	Trial 10	Trial 11	Trial 12	Trial 13	Trial 14	Trial 15	Trial 16	Trial 17	Trial 18	Trial 19		Trial 1	Trial 2	Trial 3	Trial 4	Trial 5	Trial 6	Trial 7	Trial 8	Trial 9	Trial 10	Trial 11	Trial 12	Trial 13	Trial 14	Trial 15	Trial 16	Trial 17	Trial 18	Trial 19
		0.689296	0	1	0	0	0	1	1	1	1	0	1	1	1	1	1	0	1	1	1		1	1	0	1	1	0	1	1	1	1	0	1	1	0	1	0	0	1	0
		0.698146	1	1	0	1	0	1	0	0	0	1	0	1	1	1	1	1	0	1	0		0	1	1	0	1	1	0	0	0	0	0	0	0	1	1	0	1	0	1
		0.706886	1	1	0	0	1	1	1	1	1	1	0	0	1	0	0	1	1	1	1		1	1	1	1	0	1	0	0	1	1	1	1	1	0	1	0	1	0	1
		0.715514	1	0	1	1	1	0	0	0	0	0	1	0	0	0	1	0	0	0	0		0	0	0	0	0	1	0	0	0	1	0	1	0	1	0	1	1	1	0
		0.72403	0	0	1	0	0	1	0	0	0	1	0	0	1	0	1	1	1	0	0		1	1	1	0	1	0	1	1	0	1	1	0	1	0	0	1	0	1	1
		0.732431	1	0	0	1	1	0	1	1	1	1	1	1	1	1	0	0	1	0	0		1	0	1	1	1	1	1	1	0	0	1	0	1	0	1	1	1	0	1
		0.740716	0	1	1	1	1	0	0	1	1	0	1	1	0	1	0	0	1	1	1		0	1	1	0	0	0	1	0	0	0	1	0	0	1	1	0	1	0	1
		0.748884	1	1	1	0	1	1	1	0	1	1	0	1	0	1	0	1	0	1	1		1	1	0	1	1	1	0	0	1	0	0	1	1	1	0	1	1	1	0
		0.756934	0	0	0	1	0	1	1	1	1	0	1	0	0	0	1	1	0	1	1		0	0	1	1	0	0	1	1	1	1	0	1	0	1	1	1	0	1	0
		0.764865	0	1	1	0	1	0	1	1	0	1	0	1	1	1	1	1	0	0	1		1	1	0	1	1	0	1	1	1	1	1	1	1	1	1	0	0	1	0
		0.772675	1	1	0	1	0	1	0	0	1	1	1	0	1	1	1	0	0	1	0		0	0	1	0	1	1	1	1	0	0	1	0	1	0	0	0	0	0	1
		0.780362	1	0	1	1	0	1	0	0	0	0	1	0	1	1	0	1	1	0	1		1	0	1	0	0	1	0	0	1	1	1	1	1	0	1	0	1	1	1
		0.787927	1	1	1	0	1	0	1	0	1	0	1	1	0	0	0	0	1	1	1		1	0	0	1	0	1	1	1	1	1	0	1	0	1	0	1	1	1	0
		0.795367	0	0	1	0	0	0	0	1	0	0	0	1	1	0	1	1	0	0	1		0	1	0	1	1	0	0	0	1	1	1	1	0	1	1	1	0	0	1
		0.802681	0	1	1	1	1	1	1	1	0	1	0	0	0	0	0	1	1	0	0		1	1	1	0	1	0	1	1	0	0	1	0	0	0	1	1	1	0	1
		0.809869	1	0	0	1	1	0	1	1	0	1	1	1	1	1	1	0	1	1	0		0	1	1	1	0	1	0	1	0	0	0	1	1	0	0	1	1	1	1
		0.816929	1	1	0	1	0	0	0	0	1	1	1	1	1	1	1	1	1	1	1		1	1	0	0	0	1	1	0	1	1	0	0	1	1	1	0	0	1	0
		0.82386	0	1	0	0	0	1	0	1	1	0	0	1	0	0	0	0	1	1	1		1	0	0	1	0	1	0	1	1	1	1	1	0	1	0	1	0	1	0
		0.830661	0	0	1	1	1	1	1	0	0	1	1	0	0	1	1	1	0	0	0		0	0	1	1	1	0	1	1	1	1	0	1	1	1	1	0	0	0	1
		0.83733	0	1	1	0	0	0	1	1	0	1	0	0	1	0	0	0	1	1	0		0	1	1	0	1	1	1	0	0	0	1	0	1	0	1	1	1	1	1
		0.843867	1	0	0	1	1	1	1	1	1	0	1	0	1	1	1	0	1	0	0		1	1	0	1	1	0	0	0	1	1	1	1	1	1	0	0	1	0	0
		0.850272	1	0	1	1	1	1	0	0	1	0	0	1	1	1	1	0	0	0	1		1	0	1	0	1	1	1	1	1	1	0	0	0	0	0	0	1	1	1
		0.856541	0	1	1	0	1	1	0	1	1	1	0	1	0	1	0	1	0	1	1		1	1	0	1	0	1	0	1	0	0	1	1	1	1	0	1	0	1	0
		0.862676	1	1	0	0	0	0	1	0	1	0	1	0	1	0	0	1	0	1	1		0	0	1	0	1	0	0	1	1	0	0	1	0	0	1	1	1	0	1
		0.868674	0	0	1	1	1	1	0	0	0	1	0	1	1	1	1	0	1	0	0		0	1	1	1	1	1	1	0	0	0	1	0	0	1	1	1	0	0	1
		0.874535	1	1	0	1	0	0	0	1	1	1	1	1	0	1	1	1	1	1	1		0	1	0	0	0	1	0	1	1	1	0	1	1	1	1	0	1	0	0
		0.880259	1	1	0	0	1	0	0	0	1	0	1	1	0	0	0	1	0	1	1		1	0	1	1	1	1	1	0	1	1	1	0	0	0	0	1	1	1	1
		0.885843	0	1	1	0	1	1	1	1	0	0	1	0	0	0	1	0	1	1	0		1	1	0	1	0	0	1	0	0	1	1	1	1	0	1	0	0	1	0
		0.891287	1	0	1	0	0	0	1	1	1	1	0	1	1	0	1	1	0	0	0		0	1	1	0	0	0	1	1	1	1	1	0	1	0	0	1	0	0	1
		0.89659	0	0	0	1	1	1	1	0	0	1	1	0	1	1	0	0	1	1	0		0	0	1	1	1	0	0	0	0	0	1	1	1	1	1	0	1	1	1
		0.901752	1	1	0	1	1	0	1	0	1	1	1	0	1	1	0	0	1	0	1		1	1	0	1	1	1	1	1	1	1	0	1	0	1	1	1	1	1	0
		0.906772	1	1	1	1	0	1	0	0	1	1	0	1	0	1	1	1	1	1	1		1	0	0	1	0	1	0	1	1	0	0	1	1	1	0	1	1	1	0
		0.911648	1	1	1	0	1	1	1	1	0	0	1	1	0	1	0	1	0	1	1		1	1	1	0	1	0	1	1	1	0	1	1	1	1	1	1	0	0	1
		0.91638	0	0	0	0	0	0	1	1	0	0	0	0	0	0	1	1	0	0	1		0	1	1	0	1	1	1	0	0	0	0	0	0	0	1	0	1	1	1
		0.920968	0	0	1	1	0	1	1	1	1	1	1	1	1	0	1	0	1	0	0		1	0	1	0	0	1	0	1	1	1	0	0	0	1	0	0	1	1	0
		0.92541	1	0	0	1	1	0	0	0	1	1	0	1	1	1	1	1	1	1	1		1	0	0	1	0	1	1	1	1	1	1	1	0	1	1	1	0	0	1
		0.929706	0	1	0	0	1	1	0	0	0	0	1	0	1	1	0	1	0	1	0		0	1	0	1	1	0	0	0	1	1	1	0	1	0	0	1	0	0	0
		0.933855	1	1	1	0	1	1	0	1	0	0	1	0	0	0	1	0	0	0	1		0	1	1	0	1	1	1	0	0	0	0	1	1	0	0	1	1	1	1
		0.937857	0	0	1	1	0	0	1	1	0	1	0	1	1	0	0	1	1	0	1		0	1	1	1	1	0	0	1	0	0	1	0	1	1	1	0	1	0	1
		0.941711	0	1	0	1	0	1	1	1	1	1	0	1	1	1	0	0	1	1	0		1	0	0	1	0	1	1	0	1	1	0	1	0	1	1	1	1	1	0
		0.945415	1	0	1	1	0	0	1	1	1	0	1	0	0	1	1	0	0	1	0		1	0	0	1	1	0	1	1	0	1	1	1	1	0	0	0	0	1	1
		0.948971	1	0	0	1	1	1	0	0	1	1	1	1	1	1	1	1	1	1	1		1	1	1	1	1	0	1	1	1	1	1	0	0	0	1	1	0	0	1
		0.952377	1	1	1	0	1	0	1	0	1	0	0	0	0	0	0	1	0	0	1		0	1	1	0	1	1	0	1	0	0	1	0	1	1	1	1	1	1	1
		0.955632	0	1	1	1	0	0	1	0	0	1	0	1	0	1	1	1	1	0	0		1	0	0	0	1	1	0	0	1	1	0	0	1	1	1	0	1	1	0
		0.958737	1	0	0	0	1	1	1	1	0	1	1	0	1	0	1	0	0	0	0		0	0	1	1	0	1	0	1	0	0	1	1	0	1	0	1	1	1	1
		0.96169	0	1	0	1	1	0	0	1	0	1	1	1	1	0	1	1	0	1	1		1	0	0	0	0	0	1	1	1	1	1	1	1	1	0	1	0	0	0
		0.964491	1	1	1	0	1	1	0	0	0	0	1	1	0	1	0	0	1	1	1		1	1	1	0	0	1	1	0	0	1	0	1	0	0	1	0	1	1	1
		0.96714	1	0	1	1	0	1	0	1	0	0	0	0	0	1	1	1	0	1	0		0	1	1	1	1	0	0	0	1	0	0	0	0	0	1	0	1	1	1
		0.969636	0	1	1	1	1	0	1	1	0	0	0	0	1	0	1	1	1	0	1		1	1	0	1	1	1	1	0	1	1	0	1	1	1	0	1	0	0	0
		0.97198	1	0	0	0	0	1	1	1	1	1	0	1	1	1	0	0	1	1	0		0	0	1	1	0	1	1	1	1	1	1	1	0	1	1	1	0	1	1
		0.974169	1	1	1	0	0	0	1	0	1	1	1	1	1	1	0	0	1	0	1		0	1	1	0	1	0	0	1	0	1	1	0	1	1	1	1	1	0	1
		0.976205	0	0	0	0	0	1	0	1	1	1	1	1	0	0	0	1	1	1	1		0	0	1	0	1	0	1	1	0	0	0	0	1	0	0	0	1	0	1
		0.978087	0	1	1	1	1	1	1	0	1	0	1	0	0	1	0	1	0	0	1		1	1	0	1	0	1	0	0	1	1	1	1	1	1	1	0	0	1	0
		0.979814	0	0	1	1	0	0	1	0	0	1	0	1	1	0	1	1	0	0	0		1	0	1	1	0	1	1	1	1	0	0	1	0	0	0	0	1	1	0
		0.981386	1	1	0	1	1	1	1	1	1	1	0	0	1	0	1	0	1	1	0		1	1	0	1	1	1	1	1	1	1	1	1	1	1	1	1	0	1	0
		0.982804	1	0	1	0	0	1	0	1	1	0	1	0	1	1	1	0	0	1	1		1	0	1	0	1	0	0	0	0	0	1	0	1	0	0	1	1	0	1
		0.984066	0	1	0	0	1	1	0	0	0	0	1	1	0	1	0	1	1	1	1		0	1	1	0	1	1	0	1	1	1	0	0	1	1	1	0	1	0	1
		0.985173	1	1	1	1	1	0	1	1	0	0	0	0	0	0	1	1	0	0	0		1	0	0	1	0	1	1	0	1	0	0	1	1	0	0	1	1	1	0
		0.986124	0	0	1	1	0	0	0	1	0	1	1	1	0	1	0	1	1	0	1		1	1	0	1	1	0	1	1	0	1	1	1	0	1	1	1	0	1	1
		0.98692	1	1	0	0	1	0	1	0	1	1	0	1	1	1	1	0	1	1	0		1	1	1	0	0	0	1	1	1	1	1	1	1	0	1	1	1	0	1
		0.98756	1	0	1	0	0	1	0	0	1	1	1	0	1	1	1	0	0	1	1		0	1	1	1	0	0	1	0	0	0	1	0	1	1	1	1	0	1	0
		0.988043	1	0	0	0	1	1	1	0	1	0	0	0	1	0	0	0	1	0	0		1	1	0	0	1	1	0	0	0	1	0	1	0	1	0	0	1	0	0
		0.988371	1	1	0	1	1	1	1	0	1	1	1	0	0	0	1	1	0	1	0		0	0	1	0	1	1	0	1	0	0	1	1	0	0	1	0	1	1	1
		0.988543	0	0	1	1	0	0	0	1	0	0	0	1	1	1	1	1	1	0	1		1	1	1	1	0	1	1	1	1	1	0	0	0	1	0	1	0	1	1
		0.988559	0	1	0	1	1	1	1	1	1	0	1	1	1	0	1	0	1	1	0		0	1	0	0	1	0	1	0	1	1	1	1	1	0	0	1	0	0	1
		0.988418	1	1	1	1	1	0	0	1	0	0	1	1	0	1	0	1	0	0	1		1	0	1	1	1	1	0	1	0	0	1	0	1	1	1	0	1	1	0
		0.988121	1	1	1	0	0	0	0	0	0	0	1	1	0	0	0	0	0	0	1		0	0	0	1	1	1	1	0	1	1	1	1	1	1	1	1	1	1	0
		0.987669	0	1	0	1	0	1	1	1	0	1	0	0	1	1	1	1	0	1	0		0	0	1	1	0	1	1	1	1	0	0	1	0	1	0	0	0	0	0
		0.98706	0	0	0	0	1	0	0	1	1	1	0	0	0	0	1	1	1	0	1		1	1	0	0	1	0	0	1	1	1	1	0	1	0	1	1	1	0	1
		0.986296	0	0	0	1	1	1	1	1	1	1	1	1	1	0	0	0	1	1	0		0	1	0	0	0	0	0	0	0	0	1	0	1	0	0	1	1	1	1
		0.985376	1	0	1	0	0	1	0	0	1	1	0	1	0	1	1	1	0	1	1		1	1	1	1	0	1	0	1	1	1	1	0	0	1	1	0	0	1	1
		0.9843	1	0	1	0	1	1	0	0	1	0	1	0	1	1	0	1	1	1	1		1	0	0	1	0	0	1	0	0	1	0	1	0	1	0	0	0	0	0
		0.983069	1	1	1	0	0	0	1	0	0	1	0	0	0	0	0	1	0	0	1		0	1	1	1	1	1	1	1	0	0	1	1	1	0	1	1	0	1	1
		0.981682	0	0	0	1	1	0	1	1	0	1	1	1	1	1	1	0	1	1	0		1	1	1	0	1	0	1	1	1	0	0	1	1	0	1	1	1	0	1
		0.980141	0	1	1	1	0	0	1	1	1	0	0	1	1	1	0	0	1	0	0		0	0	0	1	1	1	0	0	0	0	1	0	0	1	0	0	1	1	1
		0.978444	1	1	1	1	1	0	0	0	1	1	0	1	0	0	1	0	0	0	0		1	0	0	0	0	1	1	1	1	1	0	1	0	1	1	1	1	1	0
		0.976594	1	1	0	0	1	1	1	0	0	0	1	1	1	1	0	1	1	1	1		1	0	1	1	0	1	1	0	1	1	1	1	1	0	0	0	1	1	0
		0.974589	0	0	0	1	0	1	0	1	0	1	0	0	0	0	1	1	0	1	1		1	1	1	1	0	0	0	1	1	1	0	1	1	1	1	1	0	0	0
		0.97243	0	1	0	1	1	0	1	1	0	0	1	0	1	1	0	0	1	0	0		0	1	1	0	1	0	1	1	0	0	1	0	0	0	1	1	1	1	1
		0.970117	1	1	0	0	0	1	1	1	1	1	1	0	1	0	0	0	1	1	1		0	1	1	0	1	0	0	0	1	1	1	0	0	1	0	0	0	0	1
		0.967652	1	1	1	0	0	1	0	1	1	0	1	1	0	1	1	1	0	0	0		0	0	0	1	0	1	1	0	1	1	0	1	0	1	0	1	1	1	0
		0.965033	1	0	1	0	1	1	1	0	1	0	0	1	0	0	0	0	1	1	1		1	0	0	1	1	1	0	1	1	1	0	1	1	0	1	1	0	1	1
		0.962262	0	0	1	1	0	0	1	1	0	1	0	0	0	1	1	0	0	0	0		1	1	0	0	1	0	0	1	0	1	1	1	1	0	1	0	0	0	1
		0.95934	1	1	0	1	1	0	0	0	1	1	0	1	1	0	1	0	1	0	0		0	1	1	1	1	1	1	1	1	0	1	0	1	1	1	0	1	0	0
		0.956265	0	0	0	1	1	1	0	1	0	0	1	1	1	0	1	1	0	1	1		1	0	0	1	0	1	0	0	0	0	0	0	1	1	1	0	1	1	0
		0.95304	1	0	1	0	0	1	0	0	1	1	1	1	1	1	0	1	0	1	1		1	1	1	0	0	0	1	1	1	0	0	1	0	1	0	1	1	1	1
		0.949664	0	1	1	1	1	1	1	0	1	0	1	0	0	0	0	1	0	1	0		1	1	1	1	1	0	1	1	1	0	1	1	1	1	0	1	0	0	1
		0.946139	0	0	1	1	0	0	1	1	0	1	0	0	0	1	0	1	1	0	0		1	1	1	0	1	1	1	0	0	1	1	0	1	0	1	1	1	1	0
		0.942463	0	1	0	0	1	1	0	1	1	0	1	0	1	0	1	0	1	0	1		0	1	0	1	0	1	0	0	1	0	0	1	1	0	1	0	1	0	1
		0.938639	1	0	1	1	0	0	1	0	0	0	0	1	1	1	1	1	1	1	0		0	0	0	0	0	1	1	0	0	1	0	1	0	1	0	1	0	1	0
		0.934667	1	1	0	0	0	0	0	0	0	1	0	0	1	1	0	1	0	1	1		1	0	1	1	1	0	0	1	1	1	0	0	0	1	1	0	0	1	1
		0.930548	1	1	0	1	1	1	1	0	1	0	1	1	0	1	1	0	0	1	1		1	1	1	0	1	0	1	1	1	1	1	1	0	0	0	1	1	0	1
		0.926281	0	0	1	0	0	0	1	1	0	1	0	0	1	0	0	0	0	0	1		0	1	1	0	1	1	0	0	0	0	1	0	1	1	1	1	1	1	1
		0.921868	0	1	0	1	1	1	0	1	1	1	1	1	0	1	1	0	1	0	0		1	0	0	1	1	1	1	1	0	1	1	1	1	0	0	0	0	1	0
		0.917309	0	0	1	0	1	1	0	1	1	1	1	1	1	1	1	1	1	1	1		1	0	0	1	0	0	1	0	0	1	0	1	0	1	1	1	1	0	1
		0.912606	1	1	1	0	1	0	1	0	0	0	1	0	0	0	0	1	1	0	0		0	1	0	0	1	1	0	1	1	1	1	0	0	1	1	1	0	0	1
		0.907758	1	1	0	0	0	0	0	1	1	1	0	1	0	0	1	0	0	1	0		1	1	1	1	0	0	0	1	0	0	1	0	1	0	0	1	1	1	0
		0.902767	0	0	0	1	0	0	1	0	0	0	0	0	1	0	0	1	1	0	1		0	0	1	1	0	1	0	0	1	0	1	0	1	1	1	0	1	0	1
		0.897634	1	0	1	1	1	1	0	1	1	0	1	1	1	1	1	0	0	1	0		0	0	0	1	1	1	1	1	1	1	0	1	0	0	0	0	0	0	0
		0.892359	1	1	0	1	1	1	1	1	0	0	1	0	0	1	0	1	1	1	1		0	0	1	1	0	0	1	1	1	0	0	0	1	0	1	1	0	1	1
		0.886943	1	1	1	0	0	1	0	0	0	1	0	1	0	0	1	0	0	1	1		1	1	1	0	1	0	1	1	0	1	1	0	1	0	1	0	1	0	1
		0.881386	0	0	1	1	0	1	1	0	1	0	1	0	0	1	0	1	0	0	0		1	1	1	0	0	1	1	0	0	0	1	1	0	1	0	0	1	1	0
		0.875691	0	0	0	1	0	0	0	1	1	1	0	1	1	0	0	0	1	0	1		0	0	0	0	1	0	0	0	1	1	0	0	1	1	1	0	0	1	0
		0.869858	1	1	0	0	1	0	1	1	0	1	0	0	0	1	0	1	0	0	0		1	1	1	1	0	1	0	1	1	1	1	1	0	1	0	1	1	1	1
		0.863887	1	1	0	0	1	0	1	0	1	1	1	0	1	1	1	0	1	1	1		0	1	1	1	1	0	1	1	1	1	0	1	1	0	1	1	0	0	0
		0.857779	0	0	1	0	1	1	0	0	0	1	0	1	1	1	0	0	1	1	0		1	1	0	0	0	1	1	0	0	0	1	1	0	0	1	1	1	1	1
		0.851536	0	0	1	1	0	1	0	0	0	0	1	0	0	0	1	1	0	1	1		0	0	0	1	1	1	1	0	0	0	1	0	1	1	0	0	1	1	1
		0.845159	0	0	1	0	1	0	0	1	0	0	0	1	1	0	1	1	1	0	0		1	0	0	0	1	1	0	1	1	0	0	1	0	1	0	1	0	0	0
		0.838648	1	1	0	1	0	1	1	1	0	1	1	1	1	0	1	0	0	0	1		1	0	1	1	0	0	1	0	1	1	0	0	1	1	0	1	0	0	1
		0.832005	0	1	1	1	1	0	1	1	1	1	0	0	0	1	0	1	0	1	0		0	1	1	0	1	0	1	1	0	1	0	0	1	0	1	1	1	0	1
		0.82523	1	0	0	0	0	0	0	0	1	0	1	1	0	0	0	1	1	1	0		1	1	1	1	0	1	0	1	0	0	0	0	1	0	1	0	0	1	0
		0.818325	1	0	1	1	0	1	0	0	1	0	0	0	0	1	0	0	0	0	1		0	0	0	0	1	1	0	0	0	1	1	1	1	1	1	1	1	1	0
		0.811291	0	1	0	1	1	0	1	1	1	0	0	0	0	0	1	1	1	0	0		1	1	1	1	0	1	0	1	1	1	0	1	0	0	0	0	0	1	1
		0.804129	1	1	1	0	1	1	1	1	0	0	1	1	1	0	1	0	0	0	0		1	1	0	0	1	0	1	1	1	0	1	1	0	1	1	0	1	0	1
		0.79684	1	0	1	0	0	1	0	1	1	1	1	1	1	0	1	0	1	1	1		1	1	0	1	1	0	1	0	0	1	1	0	0	0	0	0	0	0	1
		0.789425	0	0	0	0	1	1	1	0	0	1	0	0	1	1	0	1	0	0	1		0	0	0	1	1	0	0	0	1	0	1	1	1	1	1	0	0	0	0
		0.781885	0	0	0	0	0	0	0	0	0	0	1	0	0	0	0	1	0	1	0		0	0	1	0	0	0	0	1	0	1	0	0	0	1	0	1	1	0	1
		0.774222	0	1	1	1	1	0	0	0	0	1	0	1	1	1	1	1	1	0	1		1	1	1	0	0	1	1	0	1	1	1	1	1	0	0	1	0	1	0
		0.766436	0	1	0	0	0	0	1	1	1	0	1	1	0	1	1	0	1	1	0		0	0	0	0	0	0	1	1	1	0	0	1	0	0	1	1	1	0	0
		0.75853	1	0	1	1	0	1	0	1	1	1	1	0	1	1	0	1	0	1	1		0	1	1	1	0	1	1	1	0	0	0	0	0	1	1	1	1	1	0
		0.750504	1	1	0	0	1	1	1	0	1	0	0	1	0	0	0	1	1	0	0		0	0	0	1	1	1	0	0	1	1	1	1	0	1	1	0	1	1	0
		0.742359	0	0	0	1	0	0	1	1	1	1	0	0	0	0	1	0	0	1	0		1	1	0	1	0	1	0	1	1	1	0	1	1	0	0	1	1	1	1
		0.734097	1	1	0	1	1	0	0	0	0	1	0	1	1	1	1	0	1	0	1		1	1	1	0	1	1	0	0	0	0	1	1	0	1	0	0	0	0	1
		0.725719	1	0	1	1	1	0	0	0	0	0	1	0	1	1	0	0	0	1	0		1	0	1	0	1	0	1	1	0	1	1	0	1	0	1	0	0	1	1
		0.717227	0	1	1	0	1	1	1	1	1	1	1	1	0	1	1	1	1	0	1		0	1	0	1	1	0	1	0	1	0	1	0	1	1	0	0	1	0	1
		0.708621	0	1	0	0	0	1	0	0	0	0	0	0	0	0	0	0	0	0	1		1	0	1	0	0	1	0	1	0	1	0	0	1	0	0	1	1	1	0
		0.699903	0	0	1	0	1	1	1	1	1	1	1	0	1	0	1	0	0	1	0		0	1	1	1	1	1	1	1	0	0	1	1	0	1	1	1	0	1	1
		0.691075	1	0	0	1	0	0	0	1	0	0	0	1	1	0	0	1	1	0	1		0	1	1	0	0	0	1	0	1	1	0	1	1	0	1	1	1	0	1
		0.682138	1	1	0	1	0	0	0	1	1	1	1	0	0	0	1	0	1	1	0		1	0	0	1	0	1	1	1	0	0	0	0	0	1	0	1	0	1	1
		0.673093	1	0	1	1	0	1	0	0	0	1	1	1	0	1	0	1	0	1	1		0	0	0	1	1	0	0	0	1	1	1	1	1	0	0	0	1	1	0
		0.663941	0	1	1	0	1	0	1	0	0	0	0	1	1	0	0	1	0	0	0		1	1	1	1	0	0	0	0	1	0	0	1	0	0	0	1	0	0	0
		0.654685	0	1	1	1	0	1	1	0	1	1	0	0	0	1	0	0	1	0	0		1	1	0	0	1	0	1	1	0	0	1	0	0	1	1	1	1	0	0
		0.645326	0	0	0	0	1	0	1	1	0	0	0	0	1	0	1	0	0	0	1		1	0	1	0	0	1	1	0	1	1	1	0	1	0	1	1	0	1	1
		0.635864	0	1	0	0	1	1	0	1	1	1	0	1	0	1	0	1	0	1	0		0	0	0	0	1	1	0	0	0	0	1	0	0	1	1	0	0	1	1
		0.626302	0	0	1	1	0	0	0	1	0	0	1	0	1	1	1	1	1	1	1		0	0	0	1	0	1	1	1	1	1	0	0	0	1	0	0	1	0	0
		0.616641	1	0	1	0	0	0	1	0	1	1	1	0	0	1	0	0	1	0	1		1	1	1	1	1	0	0	0	1	1	0	1	0	1	0	0	0	1	1
		0.606883	0	1	0	1	0	0	1	1	0	0	1	0	1	0	1	0	0	0	0		1	1	1	0	1	0	0	0	0	0	0	1	1	0	1	0	1	0	1
		0.597029	1	0	0	1	0	1	0	0	0	0	0	1	0	0	1	0	1	0	1		1	0	0	1	0	0	1	1	0	0	1	1	1	0	0	1	1	0	0
		0.587081	1	0	0	0	1	1	0	0	1	1	0	1	0	1	0	0	0	1	0		0	0	1	1	0	1	0	0	1	0	1	0	1	0	1	0	0	0	0
		0.57704	0	0	0	1	1	1	0	0	1	0	1	1	1	1	0	1	1	1	0		0	1	0	0	0	1	1	1	1	1	0	1	0	1	0	1	0	1	1
		0.566908	1	0	1	0	1	0	1	0	0	0	1	0	0	0	0	1	0	0	0		0	0	0	0	1	1	0	1	0	1	0	1	1	1	1	1	1	1	0
		0.556686	0	0	1	1	0	0	1	0	0	1	0	0	1	0	0	1	0	0	1		1	0	1	0	1	0	1	1	0	1	1	0	1	0	0	0	1	0	1
		0.546377	1	1	0	0	1	0	1	1	0	1	0	0	0	0	1	0	1	1	0		0	1	0	1	0	1	0	0	0	0	1	0	1	1	1	0	0	1	1
		0.535981	1	1	1	0	0	1	0	1	1	1	1	1	0	1	1	1	0	1	1		1	0	1	1	1	1	0	1	1	1	1	0	0	0	0	1	0	0	0
		0.525501	0	1	1	0	1	1	0	1	1	0	1	1	1	1	0	0	1	0	0		0	1	1	0	0	0	1	0	1	1	0	1	0	1	1	1	0	1	1
		0.514937	0	1	0	0	1	1	1	0	0	0	0	0	0	0	1	0	0	0	1		0	1	1	0	1	0	0	0	1	0	1	1	0	1	1	0	1	0	0
		0.504292	0	0	0	1	0	0	0	1	0	1	0	1	1	1	0	1	1	1	1		1	1	1	1	0	0	1	0	0	0	0	0	0	0	0	0	1	0	0
		0.493568	1	1	0	1	0	1	1	1	0	1	0	0	1	1	1	0	1	0	0		0	0	0	1	1	0	0	0	0	0	0	0	1	1	0	0	1	1	0
		0.482766	0	0	1	1	0	0	1	0	1	0	1	0	0	0	1	1	0	1	0		1	1	0	1	0	1	1	1	1	1	0	0	0	0	0	1	0	1	1
		0.471887	1	0	0	0	1	0	0	0	0	0	1	1	0	0	0	0	0	1	1		1	0	0	0	1	1	1	1	0	0	1	1	1	1	1	1	0	0	0
		0.460934	0	0	1	1	0	1	0	0	1	0	0	0	0	0	0	0	0	1	1		1	0	1	1	1	0	0	1	1	1	1	1	1	0	1	0	1	1	1
		0.449908	1	0	0	0	0	0	0	0	1	0	0	1	1	1	0	1	0	0	1		0	1	0	0	0	1	0	0	0	0	0	0	1	1	1	1	1	0	1
		0.438811	1	0	1	1	0	1	1	1	0	0	0	0	1	1	1	0	1	0	0		0	0	1	1	0	1	0	1	1	1	0	1	0	0	0	0	0	0	0
		0.427645	0	1	1	0	1	0	1	1	0	1	1	1	1	0	1	1	1	0	0		0	1	0	0	0	0	1	0	1	0	1	0	0	0	1	1	0	1	1
		0.416412	0	1	0	0	1	0	0	0	1	1	1	0	0	1	0	1	1	0	0		0	1	0	0	1	1	1	0	0	0	0	0	1	1	0	1	0	0	0
		0.405112	0	1	1	0	0	1	0	1	1	0	1	0	0	0	0	0	0	0	1		1	0	1	1	1	0	1	1	0	1	1	1	1	0	1	1	1	1	1
		0.393749	1	0	0	1	0	0	0	0	0	1	0	0	0	0	0	0	0	0	1		0	0	0	1	1	0	0	0	1	0	1	0	1	1	0	0	1	1	0
		0.382323	0	1	0	0	1	1	1	1	0	1	1	1	1	1	1	0	1	1	0		1	1	1	0	0	1	0	1	1	1	0	1	0	0	0	1	0	1	1
		0.370837	1	1	0	1	0	0	1	1	0	0	0	1	1	1	1	1	0	1	0		1	1	1	0	0	0	0	1	0	1	1	1	0	0	1	0	1	0	0
		0.359293	1	0	1	0	0	0	0	0	1	0	0	0	0	0	0	1	1	1	0		1	1	0	0	0	0	1	1	0	0	1	0	0	0	1	0	1	0	1
		0.347691	0	0	1	0	1	1	0	0	1	0	1	0	0	0	1	1	0	1	1		1	0	0	1	1	1	1	0	0	0	0	0	1	1	0	0	0	0	1
		0.336035	0	0	0	0	0	0	1	0	0	0	0	1	0	1	1	0	1	0	1		0	0	0	1	1	1	0	1	1	1	0	1	1	1	0	1	1	1	0
		0.324326	0	0	0	1	1	1	0	0	0	1	0	1	1	0	0	0	0	0	0		0	0	1	1	0	0	1	0	1	1	0	1	0	0	0	1	0	1	0
		0.312565	1	1	1	1	1	1	0	1	1	1	1	0	1	0	1	0	0	0	0		0	1	1	0	0	0	0	0	1	0	0	1	1	1	1	0	0	0	0
		0.300756	0	1	1	0	0	0	0	0	1	1	1	0	1	1	0	0	0	0	1		1	0	1	0	0	1	0	1	0	0	1	0	0	0	1	0	1	0	0
		0.288898	0	0	0	1	0	0	1	1	1	0	0	0	0	0	0	1	1	1	0		0	1	0	1	1	1	1	0	1	0	1	0	0	0	0	0	1	0	0
		0.276995	1	0	0	0	0	0	1	1	0	1	0	0	1	1	0	1	0	0	1		1	0	1	1	0	0	0	1	1	1	0	0	0	1	0	1	0	1	1
		0.265049	0	1	1	1	0	0	0	0	0	0	1	0	0	0	0	0	1	1	0		1	0	1	0	1	0	1	1	0	1	1	0	1	1	1	0	0	0	1
		0.25306	1	1	0	0	1	1	1	1	0	0	0	1	0	1	0	1	0	1	0		0	1	0	0	1	0	1	1	0	1	1	1	1	1	1	1	1	1	1
		0.241032	0	1	0	0	1	1	0	0	1	0	0	1	0	0	0	0	0	0	0		0	1	0	1	0	1	0	0	0	0	0	0	0	0	1	0	0	0	1
		0.228965	0	0	0	1	0	0	1	0	1	0	0	0	0	1	1	0	1	0	1		0	0	0	0	0	1	0	0	0	1	0	1	0	0	0	0	0	1	0
		0.216862	0	1	1	0	1	0	0	1	0	0	1	1	1	0	1	1	1	0	1		1	1	0	0	0	1	0	0	0	0	0	1	0	1	0	0	0	1	0
		0.204725	1	0	0	0	0	0	0	1	0	1	1	1	1	0	1	0	0	0	0		0	0	0	0	1	0	1	1	1	0	0	1	1	0	0	1	1	0	1
		0.192556	1	0	0	0	0	1	0	0	1	1	0	0	0	0	1	1	0	1	0		1	1	1	0	1	0	1	1	0	0	1	0	1	1	1	1	1	0	0
		0.180356	0	0	1	1	1	1	0	0	1	1	0	0	0	0	0	1	1	1	1		0	0	0	1	0	0	0	0	1	0	1	0	1	0	1	0	0	0	0
		0.168128	1	0	1	1	0	0	1	0	0	0	1	0	1	1	0	0	0	0	0		1	0	1	1	0	0	1	0	1	1	0	0	1	1	0	1	1	1	1
		0.155873	0	0	0	0	1	0	1	0	0	1	0	1	1	1	1	1	0	1	1		1	0	1	0	1	1	0	0	1	1	0	1	0	0	1	1	0	0	0
		0.143594	0	0	1	0	1	0	1	0	0	1	1	1	0	0	1	0	1	1	0		0	1	0	1	0	0	0	1	1	1	1	1	0	0	0	0	0	1	0
		0.131292	1	1	1	1	0	1	0	1	0	0	1	0	0	0	0	1	1	0	0		0	0	0	0	1	1	1	0	0	0	0	0	1	1	1	0	0	1	1
		0.118969	0	1	1	0	0	1	0	0	0	0	0	0	0	0	0	0	0	0	1		0	1	1	1	1	1	0	1	0	0	1	1	0	1	0	0	1	1	0
		0.106628	1	0	0	1	0	1	0	1	0	0	0	0	1	1	0	0	0	0	1		0	1	0	0	0	0	1	0	1	0	0	0	0	0	0	1	0	0	1
		0.0942694	0	1	0	0	1	0	1	1	1	0	0	0	1	0	1	0	1	0	0		1	0	1	1	1	1	1	0	0	1	1	0	1	0	1	1	1	0	0
		0.0818962	0	1	0	1	1	0	1	1	0	0	1	1	0	0	0	0	1	1	0		1	1	1	0	0	0	1	1	0	1	0	1	1	0	1	1	1	0	0
		0.06951	0	0	0	0	0	1	0	0	1	1	1	1	0	1	0	1	1	1	0		0	0	0	0	0	1	0	0	1	0	1	0	0	1	0	0	0	1	0
		0.0571128	0	0	0	0	0	0	0	0	1	0	0	0	0	1	0	1	0	1	0		1	0	0	1	0	1	0	1	1	0	0	0	0	1	0	0	0	0	1
		0.0447066	1	0	1	1	0	0	1	0	0	1	0	1	0	0	1	1	0	0	1		0	1	1	0	0	0	0	1	0	0	0	1	0	0	0	1	0	0	1
		0.0322934	1	1	0	1	1	0	1	1	0	1	0	0	1	0	1	0	0	0	0		0	1	1	1	1	0	0	0	0	0	1	1	1	0	1	1	1	0	0
		0.0198751	0	0	1	0	1	1	1	0	0	1	1	0	1	1	0	0	0	0	1		1	0	0	0	1	0	1	0	0	1	0	0	1	1	1	0	1	1	1
		0.00745358	1	0	1	0	0	1	0	0	1	0	0	1	0	1	0	0	1	0	1		0	0	0	0	1	0	0	0	0	0	1	1	0	0	0	0	1	1	0
		-0.00496908	0	1	0	0	0	0	0	0	1	0	0	0	1	0	1	0	1	1	0		1	1	0	0	0	1	1	0	1	1	0	0	0	0	0	1	0	1	0
		-0.017391	1	0	0	1	0	0	0	1	0	1	0	0	0	0	0	0	0	0	0		1	0	1	0	0	0	1	1	1	1	0	0	0	1	1	0	1	0	1
		-0.0298101	1	1	0	1	0	0	0	1	1	0	1	1	1	1	0	0	1	1	0		0	0	1	0	0	1	0	1	0	1	0	0	1	0	1	0	0	0	1
		-0.0422245	0	0	1	0	1	1	0	1	0	0	1	1	0	0	0	1	0	0	0		0	0	0	0	1	1	0	0	0	0	0	0	1	1	0	0	0	0	0
		-0.0546323	0	0	1	0	1	1	0	0	0	0	0	0	0	0	0	1	0	1	1		0	1	0	1	1	0	0	1	1	0	1	1	0	1	0	0	1	1	0
		-0.0670314	0	0	0	0	1	0	0	1	0	0	0	0	0	0	1	1	1	1	1		1	1	1	1	0	0	1	1	0	0	0	1	1	0	0	1	0	1	0
		-0.0794199	0	1	0	0	0	0	1	0	1	0	0	0	0	0	1	0	0	0	1		1	0	0	0	1	0	1	0	0	1	1	0	0	0	1	1	1	0	1
		-0.0917959	1	1	0	1	0	0	1	0	0	1	0	1	1	1	0	1	0	1	0		1	0	0	1	1	1	0	0	0	1	1	1	0	1	1	0	0	1	1
		-0.104157	1	0	1	1	0	1	1	0	1	1	1	1	1	1	1	0	1	0	0		0	0	1	1	0	1	0	0	1	0	0	0	1	0	0	1	0	0	0
		-0.116502	0	1	1	0	1	1	0	0	1	0	1	1	0	1	0	1	0	0	0		0	0	0	1	0	0	0	1	1	1	0	1	0	0	0	0	0	0	1
		-0.128829	0	0	0	1	0	0	1	1	1	1	1	0	0	0	0	0	0	1	0		0	1	0	0	0	0	1	1	0	0	0	1	1	0	0	1	1	0	0
		-0.141135	0	0	0	0	0	0	0	1	0	0	0	0	1	1	0	0	0	0	1		0	1	1	1	0	0	1	0	0	0	1	0	0	0	1	1	1	1	1
		-0.153419	1	1	0	0	0	1	0	0	0	1	1	0	1	0	1	0	1	1	0		1	0	0	1	1	0	0	0	1	0	1	0	0	1	1	0	0	1	0
		-0.165679	1	0	0	0	1	0	1	0	0	0	0	0	0	0	1	0	0	0	1		0	1	1	0	0	1	0	1	0	1	1	0	0	1	0	1	0	0	1
		-0.177913	0	1	1	0	1	0	0	0	0	0	0	1	1	0	0	1	0	0	0		0	0	0	0	1	1	0	1	0	1	0	0	0	1	0	0	0	0	0
		-0.190118	1	0	1	1	0	1	0	1	0	0	0	0	0	0	0	1	0	0	1		0	0	1	0	1	0	1	0	1	0	0	1	1	0	0	0	1	0	0
		-0.202294	0	0	0	1	1	1	1	1	0	0	0	1	1	1	0	1	1	0	1		1	0	0	0	0	1	1	0	0	0	1	1	1	1	1	0	1	1	0
		-0.214438	0	0	1	1	0	0	1	1	1	1	1	1	0	1	1	0	0	0	0		0	0	0	1	0	0	0	0	1	0	1	0	1	0	1	1	0	1	0
		-0.226547	0	0	0	1	0	1	0	0	1	1	1	0	0	0	1	0	1	0	1		1	0	0	1	0	0	1	1	1	0	0	1	0	0	0	0	0	0	0
		-0.238621	0	1	0	0	0	1	0	0	0	0	0	0	0	0	0	0	0	1	0		1	1	1	0	1	0	0	0	0	1	1	0	1	0	0	1	0	0	1
		-0.250657	1	0	0	0	0	0	0	0	1	0	1	0	0	0	1	0	1	1	0		0	1	1	0	0	0	1	0	0	1	0	1	0	0	1	0	0	1	1
		-0.262654	1	0	0	1	1	0	0	0	0	0	0	0	0	0	0	1	0	0	0		0	0	0	0	0	1	0	0	0	0	0	0	0	1	0	0	1	1	0
		-0.274609	0	1	1	0	1	0	0	0	1	0	0	0	0	1	0	0	1	1	0		0	1	1	0	1	1	0	1	1	0	0	1	1	1	0	0	1	0	0
		-0.286521	0	1	1	0	0	0	1	0	0	1	1	1	1	1	1	1	1	1	0		1	0	0	1	0	0	0	1	1	0	0	0	0	1	1	1	0	0	0
		-0.298388	1	1	1	0	1	0	0	0	0	0	0	1	1	0	0	1	0	0	0		1	1	0	0	1	0	0	1	0	1	1	0	1	0	1	1	0	0	1
		-0.310207	0	0	0	0	0	1	1	1	0	1	1	0	0	1	1	0	0	0	0		0	0	0	1	1	1	1	1	0	1	1	1	0	0	0	0	1	0	1
		-0.321978	1	1	0	1	0	0	1	1	0	1	0	0	0	0	0	0	0	0	1		0	1	1	1	0	1	0	0	0	0	0	0	0	0	0	0	0	1	0
		-0.333697	1	0	0	0	0	1	0	0	1	0	1	0	0	0	0	0	0	0	1		0	0	0	0	0	0	1	0	1	1	0	1	1	1	0	1	0	1	0
		-0.345364	0	0	0	0	1	0	1	1	1	0	0	0	1	0	0	1	0	1	0		1	0	1	0	0	0	1	0	0	0	1	0	0	1	1	1	1	1	1
		-0.356977	0	0	0	0	0	1	0	0	0	0	0	0	1	0	1	0	0	1	1		1	1	0	1	1	0	0	1	1	0	0	0	1	0	1	0	0	0	1
		-0.368533	1	0	1	1	0	0	0	1	0	0	0	1	0	0	1	0	0	0	1		1	0	0	1	1	0	0	0	0	0	1	0	1	0	0	0	0	0	1
		-0.380031	0	1	0	1	0	0	0	0	0	1	0	1	1	1	0	0	1	0	0		0	1	0	0	0	1	0	1	1	0	0	0	0	0	0	0	1	0	0
		-0.391468	0	1	1	1	1	0	0	0	1	1	0	1	0	1	0	0	1	0	0		0	0	0	0	0	1	1	0	1	1	1	0	0	1	0	1	0	0	1
		-0.402844	0	0	0	0	1	1	1	0	1	0	1	0	0	1	0	1	1	1	1		0	0	1	0	1	0	1	0	0	1	0	1	0	1	1	1	1	1	0
		-0.414157	0	0	1	0	0	0	0	0	0	0	1	0	0	0	0	1	0	0	0		0	0	0	0	0	1	0	0	0	0	0	1	0	0	1	0	0	1	0
		-0.425404	0	1	1	1	0	0	1	1	0	1	0	0	1	0	1	1	0	0	0		0	0	1	0	0	1	0	0	0	1	0	0	0	1	1	0	0	0	0
		-0.436584	1	0	0	1	0	0	1	1	0	0	0	0	1	0	0	0	0	1	1		1	1	1	0	0	0	0	1	1	0	0	1	0	0	0	0	0	1	0
		-0.447695	1	1	0	0	0	1	0	1	0	0	0	1	0	0	1	0	0	0	0		1	1	0	0	0	0	1	1	1	0	0	0	1	0	0	1	1	0	0
		-0.458735	0	0	0	0	1	1	0	0	1	0	1	1	0	1	0	0	1	1	0		1	0	0	1	1	0	1	0	0	1	1	0	1	0	1	1	1	1	1
		-0.469703	0	0	1	0	1	0	0	0	1	0	1	0	0	0	0	0	1	0	0		0	0	0	1	1	0	0	0	0	0	1	0	1	0	1	0	1	0	1
		-0.480596	0	0	0	0	0	0	0	1	1	1	0	1	1	1	1	1	0	0	1		0	1	1	1	1	1	1	0	0	1	1	0	0	1	0	1	0	0	0
		-0.491414	0	1	1	0	1	0	0	0	0	1	1	0	0	0	1	0	0	0	0		0	1	1	1	0	1	0	1	0	1	0	1	1	0	0	0	0	0	0
		-0.502154	1	1	0	0	0	1	1	0	0	0	0	0	0	1	0	1	1	0	0		1	0	1	0	1	0	0	1	1	0	1	1	0	1	0	0	0	0	0
		-0.512815	1	0	0	0	1	1	1	0	0	0	0	1	0	1	0	0	1	0	0		0	0	0	0	0	1	0	0	0	0	0	1	0	0	0	0	0	1	1
		-0.523395	0	0	0	1	0	1	0	0	0	0	0	0	1	1	0	0	0	1	0		0	0	0	1	0	0	0	0	1	0	0	0	0	1	0	1	0	1	0
		-0.533892	1	0	0	1	0	0	0	0	1	0	0	1	0	0	0	1	0	0	1		1	1	0	1	0	0	1	0	1	0	0	1	0	0	0	0	0	1	1
		-0.544305	0	0	0	1	1	0	0	1	0	1	1	0	0	0	0	0	0	1	1		0	1	1	0	0	1	1	0	1	0	0	0	0	0	0	0	1	0	0
		-0.554631	0	0	1	0	0	0	1	1	1	1	1	0	1	0	1	1	0	0	0		0	0	1	0	1	0	0	1	0	1	0	0	1	0	1	1	1	0	0
		-0.564871	0	0	1	0	1	0	1	1	0	0	0	0	1	1	0	0	0	0	0		1	0	0	0	1	0	0	1	0	0	0	0	1	1	1	0	1	0	0
		-0.575021	0	0	0	1	0	0	0	0	0	0	0	0	0	0	1	1	0	0	1		0	0	0	1	1	0	0	0	0	1	0	1	1	1	0	1	1	0	1
		-0.58508	0	1	0	0	0	0	0	0	0	1	0	1	0	0	0	0	0	1	0		0	1	0	0	0	0	0	1	0	1	1	1	0	0	1	1	0	0	1
		-0.595047	0	1	1	0	0	1	1	0	0	0	1	1	0	1	0	0	1	0	1		0	1	0	0	0	1	0	1	1	0	1	0	1	0	0	0	0	0	0
		-0.60492	1	1	0	0	1	1	1	1	1	0	0	0	1	0	0	0	1	1	0		0	0	0	0	0	0	1	0	0	0	1	0	0	0	0	0	0	1	0
		-0.614698	1	0	1	0	1	0	0	0	1	0	0	0	1	0	0	0	1	1	1		0	0	1	1	0	1	1	1	1	0	1	0	0	0	0	0	1	1	0
		-0.624378	0	0	1	0	0	1	0	1	1	0	0	0	0	0	1	0	0	1	0		0	0	1	1	0	1	0	0	0	0	0	0	0	1	0	0	0	1	0
		-0.63396	1	0	0	1	0	0	0	0	1	0	0	0	0	0	1	0	0	0	0		1	1	0	0	0	0	1	0	0	1	0	1	1	1	1	1	1	0	1
		-0.643441	0	0	0	1	0	1	0	0	0	1	0	1	0	0	0	0	1	0	0		1	1	0	0	1	0	1	0	0	1	1	1	1	0	1	1	0	1	1
		-0.652821	0	0	0	1	0	0	0	0	0	1	1	1	1	1	1	1	0	0	0		1	0	1	0	1	1	0	0	0	0	0	0	0	0	1	0	1	0	1
		-0.662098	0	1	0	0	0	0	0	1	0	1	1	0	0	1	1	1	0	0	1		0	0	1	1	0	0	0	0	1	0	0	0	0	0	0	0	0	0	0
		-0.671271	0	0	0	0	0	0	0	0	0	0	1	0	0	0	0	1	0	0	1		1	0	0	0	1	0	1	1	1	1	0	0	0	0	1	0	0	0	1
		-0.680337	1	1	0	0	0	0	1	1	0	1	0	0	0	1	1	1	0	0	0		1	0	0	0	0	0	0	1	0	0	0	1	0	1	0	1	0	0	1
		-0.689296	1	1	1	0	1	0	1	0	0	0	1	0	0	0	0	0	1	1	0		0	0	0	0	0	0	0	0	0	0	1	1	1	0	0	0	0	1	0
		-0.698146	1	0	1	0	1	1	1	1	1	0	0	0	0	1	0	0	1	1	0		0	1	0	1	0	1	0	0	0	0	0	0	1	0	0	1	1	1	0
		-0.706886	0	0	0	1	1	1	0	0	1	0	0	1	1	0	0	1	1	0	0		0	1	1	1	0	1	0	1	1	0	1	0	0	0	0	0	0	1	0
		-0.715514	0	0	1	1	0	0	1	0	0	1	1	0	0	0	0	0	0	1	0		0	1	1	0	1	0	1	0	1	1	0	1	0	0	0	1	1	0	0
		-0.72403	0	0	0	0	1	0	0	0	0	0	0	1	1	0	1	0	0	0	1		1	0	0	0	1	0	1	0	0	1	0	0	0	1	1	0	0	0	1
		-0.732431	0	1	0	0	0	0	0	0	1	0	1	0	1	0	1	0	0	0	1		1	0	1	0	0	0	1	0	0	0	1	1	1	0	1	0	0	0	1
		-0.740716	0	1	1	0	0	0	0	0	0	0	0	1	0	0	0	1	0	0	0		0	0	0	0	1	1	0	0	0	1	1	0	0	1	0	0	0	0	0
		-0.748884	1	0	1	0	0	1	0	1	1	0	1	1	0	1	0	1	1	1	1		0	0	0	0	0	1	0	1	1	0	0	0	0	1	0	0	0	0	0
		-0.756934	1	0	0	1	0	1	1	0	0	1	0	0	0	0	0	0	0	0	1		0	1	0	1	1	0	0	1	1	0	0	0	1	1	0	1	1	0	0
		-0.764865	0	1	0	1	0	0	1	1	0	1	0	0	0	1	0	0	1	0	0		1	0	0	1	0	0	0	0	0	1	0	0	0	0	1	0	1	0	1
		-0.772675	0	0	0	1	0	1	0	0	0	1	0	0	0	1	0	0	0	0	0		1	1	0	0	0	0	0	0	1	0	0	0	1	0	1	1	1	1	0
		-0.780362	0	0	0	0	1	0	1	1	1	0	0	0	1	1	0	1	1	0	0		0	0	1	0	0	1	0	1	0	1	0	1	1	0	0	1	0	1	1
		-0.787927	0	0	0	0	1	0	0	0	0	0	0	1	1	0	0	1	0	1	0		1	0	0	0	0	1	1	0	0	0	0	1	0	1	1	0	0	0	1
		-0.795367	1	0	0	0	0	0	0	1	0	0	0	0	0	0	1	0	0	1	0		0	0	0	1	1	0	1	0	1	0	1	1	1	0	0	0	0	0	0
		-0.802681	1	1	0	0	0	0	0	0	0	0	1	1	1	0	1	0	0	0	1		0	0	1	1	1	0	0	0	0	0	0	1	0	1	0	0	1	1	0
		-0.809869	1	1	0	0	0	1	1	0	0	1	1	0	1	0	1	0	1	1	1		0	1	0	0	0	0	0	0	1	0	0	0	0	1	0	0	0	1	0
		-0.816929	0	0	1	0	0	1	1	0	1	0	0	0	0	0	1	0	0	1	0		0	1	1	0	0	1	0	1	0	1	0	0	0	0	0	1	0	0	0
		-0.82386	0	0	1	0	1	0	0	0	1	1	1	0	0	0	0	0	1	0	1		1	1	1	0	0	1	1	1	0	1	0	0	0	0	0	1	1	0	0
		-0.830661	0	0	1	1	0	0	0	0	0	0	0	0	0	0	0	0	0	0	0		1	0	0	0	1	0	1	1	0	0	1	0	0	0	0	0	0	0	1
		-0.83733	0	0	0	1	1	0	0	1	0	1	0	0	0	1	0	1	0	0	0		0	0	0	0	1	0	1	0	0	0	1	0	1	0	1	1	0	1	0
		-0.843867	1	0	0	1	1	0	0	0	0	0	0	1	0	1	0	0	0	0	0		1	0	0	1	0	0	0	0	1	0	1	1	1	0	0	0	1	1	1
		-0.850272	1	1	1	0	0	1	1	1	0	0	0	1	1	1	1	1	0	0	0		0	0	1	0	1	0	0	0	0	0	0	1	0	1	1	0	0	0	0
		-0.856541	0	1	1	0	1	1	0	1	1	1	1	1	0	0	0	1	1	1	1		0	1	0	1	0	0	0	1	0	1	1	0	1	0	0	1	1	0	1
		-0.862676	0	0	0	1	0	0	0	0	0	0	0	0	1	0	1	0	0	1	0		0	0	1	0	0	1	0	1	0	1	0	0	0	1	1	0	1	1	0
		-0.868674	1	1	0	0	1	0	0	0	1	1	1	0	0	0	0	0	1	0	1		0	1	0	0	0	1	0	0	1	0	1	0	0	0	1	0	0	0	0
		-0.874535	0	0	0	0	0	0	0	0	0	0	0	0	0	0	0	0	0	1	0		0	0	0	1	0	1	1	1	1	1	0	0	0	0	0	0	0	0	0
		-0.880259	0	0	0	0	0	0	0	0	1	1	0	0	0	0	0	0	1	0	0		0	0	0	0	0	0	1	0	1	0	1	0	1	0	0	1	0	0	0
		-0.885843	0	0	0	0	0	0	0	0	0	0	0	1	0	0	0	1	0	0	0		1	0	0	1	1	0	0	0	0	0	0	1	0	0	0	1	0	0	1
		-0.891287	1	1	0	1	0	1	0	1	0	0	0	0	0	1	1	0	1	0	0		1	0	0	1	1	0	0	0	0	0	0	1	0	1	1	0	0	1	0
		-0.89659	0	1	1	1	0	0	1	1	1	0	1	1	1	1	1	0	0	0	0		0	1	1	0	0	0	0	0	0	1	0	0	0	1	0	1	0	1	1
		-0.901752	0	0	1	1	1	1	1	0	0	0	1	1	1	1	1	1	0	0	0		1	1	1	0	1	0	0	1	1	1	0	1	1	1	1	0	1	0	1
		-0.906772	0	1	1	0	1	1	1	0	1	0	1	0	1	0	0	0	0	1	1		1	0	0	1	0	1	1	1	0	0	0	0	1	0	0	0	1	0	1
		-0.911648	1	0	0	0	1	0	0	1	1	0	0	0	0	0	0	1	0	0	1		0	0	1	0	0	0	1	0	0	0	1	0	0	0	0	0	0	0	0
		-0.91638	0	0	0	0	0	0	1	0	0	1	0	0	1	0	0	0	0	0	1		0	0	0	0	0	1	0	0	0	0	1	0	0	0	0	0	1	1	0
		-0.920968	1	0	0	0	0	0	1	1	0	1	0	0	0	0	0	0	0	0	0		0	1	1	1	0	0	1	0	0	0	0	1	0	1	1	0	0	1	0
		-0.92541	1	1	0	0	0	0	0	0	0	1	0	0	0	1	0	0	1	1	0		0	1	0	0	0	0	0	0	1	1	1	0	0	0	0	0	0	0	0
		-0.929706	0	1	1	0	0	1	0	0	0	0	0	1	0	1	0	0	1	1	0		0	0	0	1	1	0	0	1	0	1	0	0	1	1	0	1	0	0	0
		-0.933855	0	0	1	0	0	1	0	0	0	0	1	0	0	0	1	0	1	1	0		1	1	0	0	1	0	0	0	1	0	0	1	1	0	0	0	1	0	0
		-0.937857	0	0	0	1	0	0	0	0	1	0	0	1	1	1	1	1	0	0	0		0	0	0	0	0	1	0	1	1	1	0	0	0	0	1	1	0	0	1
		-0.941711	0	0	0	1	1	1	0	0	0	0	1	0	1	0	0	0	0	0	1		1	0	1	0	1	1	0	0	0	0	1	1	1	0	0	1	1	0	1
		-0.945416	0	0	0	1	1	0	1	1	1	1	1	0	0	0	0	0	0	1	0		1	0	0	0	0	0	1	0	0	0	0	1	0	0	1	0	1	0	1
		-0.948971	0	0	1	0	1	0	1	1	0	1	0	1	0	0	0	1	1	0	1		0	0	0	1	0	1	1	0	0	0	0	0	0	0	1	0	0	1	0
		-0.952377	0	0	0	0	1	0	0	0	0	0	0	0	0	0	0	1	0	0	0		0	1	0	1	1	0	0	0	0	0	0	0	0	0	0	0	0	1	0
		-0.955632	1	0	0	0	0	0	1	1	0	0	0	0	0	0	1	0	1	0	1		0	1	0	0	0	0	1	1	1	1	0	0	1	1	0	1	0	0	0
		-0.958737	1	1	0	1	0	1	0	0	0	0	0	1	1	0	1	0	0	0	1		0	1	1	0	1	1	0	1	1	1	0	0	0	1	0	1	0	0	0
		-0.96169	1	1	0	1	0	1	0	0	1	1	0	1	0	1	1	0	0	1	0		0	0	1	0	0	0	0	0	0	1	1	1	1	0	0	0	0	1	1
		-0.964491	0	1	0	0	0	0	0	1	1	0	1	0	0	1	0	0	0	1	1		1	0	0	0	0	1	0	0	0	0	1	1	0	1	1	0	0	1	1
		-0.96714	0	0	1	0	1	0	0	0	0	0	1	0	0	1	0	1	0	0	0		0	0	1	1	0	0	0	0	0	0	0	0	0	0	0	1	1	0	0
		-0.969636	1	0	0	0	0	0	1	1	0	0	0	0	1	0	0	1	0	1	0		1	0	1	0	1	1	1	1	0	0	0	0	0	0	1	1	0	0	1
		-0.97198	0	0	1	0	1	1	1	0	0	1	1	0	1	0	1	0	1	0	0		1	0	0	1	0	0	1	1	0	0	0	1	0	0	0	0	1	0	0
		-0.974169	0	0	1	1	1	0	0	0	0	0	0	0	0	1	1	0	1	1	0		0	0	0	0	0	0	0	1	0	0	1	0	1	1	0	0	1	0	0
		-0.976205	0	0	0	0	0	0	0	0	0	1	0	1	0	1	0	1	1	0	0		0	1	0	0	0	0	0	0	1	1	1	0	1	1	0	0	1	1	0
		-0.978087	0	1	0	1	0	0	0	0	1	0	0	0	0	0	0	1	0	0	0		0	1	0	0	0	0	0	1	1	1	1	0	0	0	0	1	0	1	0
		-0.979814	1	1	0	1	0	0	0	1	1	1	0	1	0	0	0	0	0	0	1		0	1	1	0	0	1	0	0	1	0	0	0	0	0	1	1	0	0	0
		-0.981386	1	0	1	0	0	1	1	1	0	1	0	1	1	0	0	0	0	0	1		1	0	0	1	1	0	1	0	0	1	1	1	0	0	1	0	0	0	1
		-0.982804	1	0	0	0	0	1	0	0	1	0	1	1	1	0	0	0	0	0	0		1	1	0	1	1	1	1	0	0	0	0	1	1	0	1	0	1	0	0
		-0.984066	0	1	1	0	1	1	1	0	0	0	1	0	0	0	0	1	1	0	1		0	0	1	1	0	0	0	0	0	0	1	0	0	0	0	0	0	1	1
		-0.985173	0	0	1	0	1	0	0	0	0	0	1	0	1	0	1	0	0	1	0		1	0	0	0	1	1	1	1	1	0	0	1	0	1	0	1	1	0	1
		-0.986124	0	1	0	1	0	0	1	0	1	0	0	0	0	1	1	0	1	1	0		0	0	0	0	0	1	0	1	1	0	0	0	0	1	0	0	1	1	0
		-0.98692	0	0	0	0	0	0	0	1	0	0	1	1	0	1	1	0	0	0	1		0	1	0	1	1	0	0	0	0	0	0	1	1	0	0	0	0	0	1
		-0.98756	0	0	0	0	0	0	1	1	1	0	0	0	0	1	0	0	0	1	0		0	0	1	1	1	0	0	0	0	0	0	0	1	1	1	0	0	0	0
		-0.988043	0	0	0	0	1	0	0	0	0	0	0	0	0	0	0	0	0	1	1		0	0	1	0	0	0	1	0	0	1	0	0	0	1	0	1	0	0	0
		-0.988371	1	0	0	1	1	1	0	0	0	1	0	0	0	0	0	1	0	0	0		0	0	1	0	0	0	0	0	0	1	1	0	1	0	1	1	0	0	0
		-0.988543	1	1	0	1	0	1	0	1	0	1	0	0	1	1	0	1	1	0	0		0	1	0	0	0	0	0	1	1	0	1	0	0	0	1	0	0	1	1
		-0.988559	1	0	0	0	0	0	1	0	0	1	1	1	1	1	1	0	1	1	0		1	0	0	0	0	1	0	0	0	0	0	0	0	0	0	0	1	1	0
		-0.988418	0	1	1	0	0	0	0	1	1	1	1	1	1	0	0	1	1	0	0		0	0	0	0	1	1	0	1	1	0	0	0	1	0	0	1	0	1	1
		-0.988121	0	0	1	0	1	1	0	1	1	0	0	1	0	0	1	0	0	1	0		1	1	0	0	0	0	1	0	1	1	0	1	0	0	0	0	1	0	0
		-0.987669	0	1	0	0	0	0	0	0	0	0	0	0	0	0	0	1	0	0	1		1	0	1	1	1	1	1	1	0	0	0	1	1	1	1	0	0	0	0
		-0.98706	0	0	1	1	0	0	0	0	0	0	0	0	0	0	0	0	0	0	1		1	0	0	1	0	0	1	0	0	0	0	1	0	0	0	0	0	0	0
		-0.986296	1	0	0	1	0	0	1	0	1	0	1	0	0	0	0	0	0	0	1		0	0	1	1	1	0	0	0	1	0	1	0	0	1	0	0	1	0	0
		-0.985376	0	1	1	1	0	1	1	0	0	1	0	0	0	0	1	0	1	0	0		0	1	0	0	0	0	0	0	1	1	1	0	0	1	0	1	0	1	0
		-0.9843	1	0	1	0	1	0	0	0	0	0	0	0	0	0	0	0	0	0	0		0	1	1	0	1	0	0	0	0	1	0	0	0	0	0	1	1	0	0
		-0.983069	0	1	0	0	1	0	1	0	0	1	0	0	1	0	1	1	0	0	1		1	0	0	0	0	0	0	0	0	0	1	1	1	0	1	1	0	1	1
		-0.981682	1	0	0	0	0	0	0	1	0	0	1	1	0	1	1	1	1	0	0		1	0	0	0	0	1	1	1	0	1	0	0	1	0	1	0	0	0	1
		-0.980141	0	0	0	1	1	1	0	1	1	1	0	1	1	1	1	0	0	1	0		0	0	1	1	0	1	0	0	0	0	1	0	1	0	0	1	0	0	0
		-0.978444	0	0	0	0	0	1	0	1	1	1	1	1	1	1	0	1	1	1	0		0	1	1	0	0	0	1	1	0	1	0	0	0	1	0	0	1	1	1
		-0.976594	1	0	0	0	0	1	0	1	1	0	1	0	1	0	0	0	1	1	1		0	0	0	1	0	1	1	1	1	1	1	1	1	1	0	0	0	0	1
		-0.974589	0	0	0	0	0	0	0	0	0	0	0	1	0	1	0	0	0	1	1		0	0	0	1	1	0	0	0	1	0	0	1	0	0	1	0	0	1	0
		-0.97243	0	1	0	1	1	0	1	0	0	0	0	0	0	0	0	0	0	0	0		1	1	0	0	1	0	0	0	0	0	0	0	0	0	1	0	1	1	0
		-0.970117	0	1	1	1	1	0	1	0	0	0	0	0	0	0	1	0	0	0	0		0	1	0	0	0	0	0	0	1	0	0	0	0	1	0	1	0	0	1
		-0.967652	0	1	1	0	0	0	1	1	0	0	0	0	0	1	1	0	1	0	0		1	0	0	0	1	1	0	1	0	0	0	0	0	0	0	0	1	0	0
		-0.965033	1	0	1	0	0	1	0	0	0	0	1	0	0	0	0	1	0	0	0		1	0	0	0	0	0	1	0	0	0	1	0	0	0	0	1	0	1	0
		-0.962262	1	0	1	0	0	1	0	0	1	1	1	0	0	0	0	1	0	0	1		0	0	1	0	1	1	1	0	0	0	1	1	1	0	0	0	0	0	0
		-0.95934	0	0	0	1	0	0	1	1	0	1	0	0	1	0	0	1	0	0	1		0	0	1	1	0	0	0	0	0	1	1	0	1	0	1	1	1	0	0
		-0.956265	0	1	1	1	0	1	0	0	1	1	1	1	1	0	0	0	0	0	0		0	1	0	1	0	0	0	1	1	1	0	1	0	1	0	0	0	0	1
		-0.95304	0	1	0	0	1	0	0	0	0	0	0	1	1	1	1	1	0	1	1		0	1	0	0	0	0	1	0	1	1	0	0	0	1	1	1	1	0	1
		-0.949664	0	0	0	1	1	0	0	0	0	0	0	1	0	1	0	0	1	1	0		1	0	0	1	0	0	0	1	0	1	0	0	1	0	0	0	1	1	0
		-0.946139	0	0	0	0	0	0	0	0	0	1	0	0	1	0	1	0	0	1	0		1	1	0	0	1	1	0	1	0	0	0	1	1	1	0	0	0	1	0
		-0.942463	1	1	0	0	0	0	0	0	0	0	0	0	0	0	1	0	1	0	1		0	0	1	0	0	1	0	0	1	0	1	0	0	0	0	0	0	0	0
		-0.938639	1	0	1	0	0	0	1	0	1	0	0	1	0	1	0	0	1	1	0		1	1	1	0	1	0	1	1	0	0	0	1	0	1	1	0	0	0	1
		-0.934667	0	0	1	0	1	1	1	1	1	0	1	1	0	0	0	1	0	0	1		0	0	0	0	1	0	1	1	0	0	1	1	1	0	1	1	0	1	1
		-0.930548	1	0	1	0	1	1	0	1	1	0	1	0	1	1	0	0	0	0	1		0	0	1	0	0	1	0	0	0	1	0	0	1	0	0	0	1	0	1
		-0.926281	1	0	0	1	0	1	0	0	1	0	0	0	0	0	0	1	0	0	0		0	0	0	1	0	0	0	0	1	0	0	0	0	0	0	1	0	0	0
		-0.921868	1	0	0	1	1	0	1	1	0	1	1	0	1	1	1	1	0	0	0		0	0	0	0	0	0	0	0	0	1	0	0	0	0	1	0	1	0	1
		-0.917309	0	1	0	0	0	0	0	1	0	1	0	0	0	0	1	0	1	0	0		0	0	1	1	0	0	0	0	1	0	0	1	0	0	0	1	0	0	1
		-0.912606	0	1	0	0	0	0	0	0	0	1	0	0	0	0	0	0	1	1	0		1	0	0	1	1	0	1	1	0	0	0	1	0	0	0	0	0	1	0
		-0.907758	0	0	0	0	1	1	0	0	0	0	0	0	0	0	0	1	0	1	0		1	1	1	1	1	1	1	1	1	0	1	0	1	1	1	1	1	1	0
		-0.902767	0	1	1	1	0	1	1	0	0	0	0	1	0	0	0	1	1	0	1		0	1	0	1	0	1	0	0	0	1	1	0	1	1	0	0	0	1	0
		-0.897634	0	0	0	1	1	0	1	0	0	0	0	1	1	0	0	0	0	0	1		0	1	0	0	0	0	1	0	0	1	0	0	0	1	1	0	1	0	0
		-0.892359	0	0	0	1	0	0	1	0	1	0	1	0	1	1	1	0	0	0	0		0	0	0	0	1	0	0	1	0	0	0	0	0	0	0	0	1	1	0
		-0.886943	0	0	1	0	1	0	0	1	1	1	1	1	1	1	1	0	0	1	1		1	1	0	0	1	0	0	0	0	0	1	1	0	1	1	0	0	0	1
		-0.881386	0	0	1	0	1	0	0	1	0	0	0	0	0	0	0	0	1	1	0		1	0	1	0	0	1	1	0	1	0	1	0	0	0	0	1	0	0	0
		-0.875691	1	1	0	0	0	1	0	0	1	1	1	1	0	1	1	0	0	1	0		0	0	1	0	0	1	0	0	1	0	0	1	0	0	1	1	0	0	1
		-0.869858	1	1	0	0	0	0	1	1	0	1	0	1	0	0	1	1	1	0	0		1	0	0	0	0	1	1	0	1	0	1	1	1	1	0	1	0	0	1
		-0.863887	1	1	1	0	0	1	1	0	1	0	1	1	1	1	0	0	1	0	0		1	0	0	1	1	0	1	1	0	1	0	0	1	0	0	0	0	1	0
		-0.857779	0	0	1	0	0	1	0	0	0	1	1	0	1	0	0	1	0	1	1		0	1	1	1	0	0	0	1	0	0	0	0	1	1	0	1	1	1	0
		-0.851536	1	1	0	1	0	0	0	0	0	0	0	0	0	0	0	1	0	0	1		0	0	0	1	0	0	0	0	0	1	0	0	0	0	0	0	0	0	0
		-0.845159	0	0	1	1	0	0	0	1	0	0	0	0	0	0	1	1	0	1	1		0	0	0	0	0	0	0	1	0	1	0	1	0	1	1	0	1	0	0
		-0.838648	1	0	0	1	0	0	1	0	0	0	0	0	0	1	1	0	0	0	0		0	0	0	0	0	0	0	0	1	0	1	1	0	0	1	0	1	1	1
		-0.832005	0	0	0	0	1	0	1	1	0	0	0	0	1	0	0	1	1	0	0		1	1	0	0	1	0	0	0	0	0	1	1	0	0	0	0	0	0	1
		-0.82523	0	0	0	1	1	1	0	1	1	1	1	0	1	1	0	0	0	0	0		1	1	1	1	1	1	1	0	1	0	1	0	1	0	0	1	0	1	0
		-0.818325	1	1	0	0	1	1	0	0	1	0	1	0	0	0	0	0	0	1	1		0	1	1	0	0	1	0	0	1	1	0	0	0	1	0	1	0	0	0
		-0.811291	0	1	0	0	0	0	0	0	0	1	0	1	0	1	0	0	0	0	1		0	0	0	0	1	1	1	1	1	1	0	0	0	1	1	0	1	0	0
		-0.804129	1	0	0	0	0	1	0	0	0	1	1	1	0	0	0	0	1	1	0		0	1	1	0	0	0	1	1	0	1	0	1	1	0	1	0	1	0	1
		-0.79684	0	1	1	1	1	0	1	0	1	0	1	1	0	0	1	0	1	0	0		0	0	0	1	0	0	0	0	0	0	1	0	1	0	0	1	0	0	0
		-0.789425	0	1	1	0	1	0	1	0	1	0	0	0	1	1	1	1	1	0	0		0	0	0	1	1	0	0	0	0	0	1	0	0	1	0	0	0	1	1
		-0.781885	0	0	1	1	0	1	0	1	1	0	0	0	0	0	0	1	0	0	0		1	1	0	0	0	1	0	1	1	0	0	1	0	1	0	1	0	0	0
		-0.774222	0	0	0	1	1	0	0	0	0	0	0	1	1	0	1	1	0	1	0		1	0	1	1	1	0	1	1	0	1	0	0	1	0	1	0	1	1	0
		-0.766436	1	0	0	1	0	0	1	1	0	0	1	1	1	1	1	0	1	0	0		1	0	0	1	0	1	1	1	0	0	0	1	0	0	1	0	1	1	1
		-0.75853	0	0	0	0	0	0	0	1	0	1	0	0	0	0	0	0	1	1	0		0	0	1	0	0	0	0	0	1	0	1	0	0	0	0	0	0	0	0
		-0.750504	1	1	1	0	0	0	0	1	1	1	0	0	0	0	0	0	0	1	0		0	1	1	0	0	0	1	0	0	1	1	0	1	0	0	1	1	0	1
		-0.742359	1	0	1	0	0	1	0	0	1	0	0	0	0	0	0	1	0	0	1		0	0	0	0	1	1	0	1	0	1	0	0	0	0	1	1	0	0	1
		-0.734097	0	1	0	0	0	1	0	0	0	1	1	1	0	1	1	1	0	0	1		0	1	0	0	1	0	0	0	0	0	0	1	1	0	1	0	0	1	1
		-0.725719	0	0	0	1	0	0	1	0	0	1	1	1	0	1	1	0	1	0	1		0	0	1	0	0	1	0	0	1	0	1	1	1	1	0	1	0	1	0
		-0.717227	0	0	1	0	1	1	1	0	0	0	0	1	1	1	1	0	1	1	0		1	0	1	1	0	0	0	0	1	0	1	0	0	1	0	0	0	1	1
		-0.708621	0	1	1	0	1	0	1	1	1	1	0	0	1	1	0	0	0	0	1		0	1	0	0	1	0	1	0	1	1	0	1	0	1	1	0	1	0	0
		-0.699903	1	1	0	1	1	1	0	1	0	0	1	0	0	0	0	1	0	1	0		1	1	0	1	0	1	1	1	0	1	0	0	0	0	1	0	1	1	0
		-0.691075	1	0	0	1	0	0	1	0	1	0	0	0	1	0	0	1	0	0	0		1	0	0	1	0	0	1	1	0	0	0	0	0	1	0	0	0	0	1
		-0.682138	0	0	0	1	1	0	0	1	0	1	1	0	1	0	0	0	0	0	1		1	1	0	1	0	1	1	0	1	0	1	0	1	0	1	1	0	0	0
		-0.673093	0	0	1	0	1	0	0	1	1	1	1	0	0	0	1	0	1	1	0		0	0	1	0	1	0	0	1	1	0	0	0	0	0	0	1	0	0	1
		-0.663941	0	0	1	0	0	0	0	0	0	0	1	1	1	1	0	0	1	0	1		0	0	1	0	0	0	0	0	0	1	0	1	1	0	0	1	1	1	0
		-0.654685	1	1	0	1	1	1	0	0	1	0	0	0	0	0	1	0	0	1	0		1	0	0	0	1	1	0	0	0	1	0	1	1	0	0	0	1	1	0
		-0.645326	1	1	0	0	0	1	1	0	0	0	0	1	1	1	0	1	1	0	1		1	0	1	0	1	0	0	0	0	1	1	1	0	1	0	0	1	0	0
		-0.635864	1	0	0	0	1	0	1	0	0	0	1	1	0	0	0	0	0	1	1		0	1	1	1	1	1	0	1	0	0	1	0	0	1	0	0	0	0	0
		-0.626302	0	1	1	0	0	1	1	0	1	1	1	0	0	1	1	1	0	0	0		1	1	1	0	0	1	1	1	0	0	0	0	0	1	1	1	1	0	1
		-0.616641	0	0	0	0	0	1	0	1	1	1	0	1	0	1	0	0	1	1	0		0	0	0	1	0	0	1	0	1	1	1	1	1	1	1	1	1	0	1
		-0.606883	0	1	0	0	0	1	0	0	1	0	0	0	1	0	1	1	0	0	1		0	1	0	1	0	0	1	0	0	0	0	0	1	0	1	0	0	1	1
		-0.597029	0	0	1	1	0	0	0	1	0	1	0	1	0	0	0	1	1	1	1		0	1	0	0	1	0	0	0	1	0	0	1	1	0	0	1	0	1	0
		-0.587081	0	0	1	1	0	0	0	0	0	0	1	0	0	0	1	0	0	0	0		0	0	1	0	0	1	0	1	1	0	1	0	0	1	0	0	0	0	0
		-0.57704	1	0	1	0	1	0	1	1	0	0	1	0	1	1	0	1	0	0	0		1	0	0	1	1	1	0	1	1	1	0	1	0	0	0	1	1	0	1
		-0.566908	1	0	0	1	1	0	1	1	1	0	0	0	1	0	1	0	1	1	0		1	0	0	0	0	0	1	1	1	1	1	0	1	0	1	0	1	1	0
		-0.556686	0	1	0	1	0	1	0	0	0	0	0	0	0	0	0	0	0	1	1		1	1	0	0	0	0	1	0	0	0	1	1	1	0	1	0	0	1	0
		-0.546377	1	0	0	0	1	1	0	0	1	1	0	1	1	0	0	0	1	0	1		0	1	1	1	0	0	0	0	0	0	1	0	0	0	0	0	0	1	1
		-0.535981	1	1	0	1	0	0	1	1	0	1	1	1	0	1	1	0	1	0	0		1	0	1	0	1	1	0	0	0	1	0	0	0	1	1	1	0	0	1
		-0.525501	0	1	1	0	1	1	1	1	1	1	1	1	1	0	0	1	0	1	1		0	0	0	1	1	1	1	0	1	1	0	1	0	1	0	1	1	0	0
		-0.514937	0	0	0	0	1	1	0	0	0	0	1	0	0	1	0	1	0	1	0		0	1	1	1	1	0	1	1	0	0	0	0	0	0	0	0	1	1	0
		-0.504292	1	1	0	0	0	0	0	0	1	1	0	0	0	0	1	1	0	0	0		1	1	1	0	1	1	0	1	1	0	1	0	1	1	0	0	0	0	0
		-0.493568	1	1	1	1	0	0	1	0	1	1	0	0	0	1	1	0	1	0	0		0	0	0	1	0	0	0	0	1	1	1	0	1	1	0	0	0	0	1
		-0.482766	0	0	1	1	1	0	0	1	0	0	1	1	1	1	1	1	1	1	1		1	0	0	0	0	0	0	1	0	1	0	1	0	1	1	1	1	0	1
		-0.471887	1	0	0	0	1	0	1	1	0	1	0	1	1	1	0	0	0	0	0		0	0	0	1	1	0	1	0	0	1	0	1	1	0	1	1	1	1	1
		-0.460934	0	0	0	1	0	0	0	1	0	0	1	0	0	0	1	0	1	0	1		0	1	1	0	1	0	1	1	0	0	0	0	1	1	1	0	0	1	0
		-0.449908	0	0	0	0	0	1	0	0	1	0	0	0	1	0	0	1	0	0	1		1	1	1	0	1	1	0	0	1	0	0	0	0	0	0	1	0	0	0
		-0.438811	0	1	1	1	0	0	1	0	1	0	0	0	0	0	0	0	0	1	1		0	0	0	0	0	1	1	1	1	0	1	1	0	0	1	1	1	0	0
		-0.427645	0	1	1	1	1	1	1	0	0	1	0	1	0	0	0	1	1	1	0		1	0	0	0	0	1	0	1	0	1	0	1	0	1	0	0	0	1	1
		-0.416412	1	1	1	0	1	1	1	1	0	1	0	1	1	0	0	0	0	0	1		1	1	0	1	0	0	0	1	0	1	1	1	0	0	0	0	0	1	1
		-0.405112	1	0	0	0	0	1	0	0	0	0	1	0	0	1	0	0	1	0	0		0	1	1	1	0	1	1	0	0	0	1	0	1	1	1	0	0	0	0
		-0.393749	1	0	0	0	0	0	0	0	0	0	0	1	1	0	1	1	0	0	0		0	1	1	0	1	1	0	0	1	0	1	0	1	1	0	0	0	0	0
		-0.382323	0	1	1	1	0	0	0	0	1	1	1	0	1	1	1	0	1	0	0		0	0	0	1	0	1	1	0	1	0	0	1	0	0	1	1	1	0	0
		-0.370837	0	1	0	0	0	1	0	1	0	1	1	1	1	1	1	1	0	1	0		1	0	1	0	1	0	1	0	0	1	0	0	1	0	0	1	1	1	1
		-0.359293	1	0	1	1	1	1	0	1	1	0	0	0	0	1	1	1	1	1	1		1	0	0	1	1	0	0	1	0	0	1	0	1	0	1	0	1	1	0
		-0.347691	1	0	0	0	1	0	0	1	1	0	1	0	0	0	0	0	1	1	1		1	0	0	0	0	0	0	0	1	0	0	1	0	1	0	1	0	0	1
		-0.336035	0	1	1	1	0	1	1	0	1	0	0	1	0	1	0	0	0	0	0		0	1	1	0	0	0	0	1	0	0	1	0	0	1	0	1	0	0	0
		-0.324326	0	0	0	1	1	0	1	1	0	0	1	0	1	0	1	0	1	0	1		1	0	0	0	0	1	1	1	0	1	0	1	1	0	0	0	1	0	1
		-0.312565	1	0	0	0	0	1	1	0	0	1	0	0	1	0	0	0	0	0	0		0	1	1	1	0	0	1	0	1	1	1	1	1	0	1	0	1	1	1
		-0.300756	0	0	1	0	1	0	1	0	0	1	0	1	0	1	0	1	0	1	1		0	1	0	0	1	1	1	0	0	0	0	0	1	1	1	0	0	1	0
		-0.288898	0	0	0	0	1	0	0	1	1	0	0	0	0	0	0	1	0	1	0		0	1	0	0	1	0	0	1	1	1	0	0	0	0	0	1	0	1	0
		-0.276995	1	1	0	0	0	1	0	0	1	1	0	1	1	1	1	0	0	1	1		1	0	1	0	0	1	1	0	1	1	0	1	0	1	1	0	0	0	1
		-0.265049	0	0	1	1	0	0	1	1	0	0	1	1	0	1	1	1	1	0	0		1	1	0	1	1	1	0	0	0	1	1	0	1	0	0	1	1	0	1
		-0.25306	0	0	0	0	0	1	1	1	1	0	1	0	1	0	1	0	1	1	0		0	0	1	1	1	0	0	1	0	0	1	1	0	0	0	0	1	1	0
		-0.241032	1	1	1	1	1	1	1	0	0	1	1	0	1	0	0	1	1	1	1		1	0	1	1	0	0	0	0	1	0	0	1	0	0	0	1	0	1	0
		-0.228965	1	0	1	0	1	0	0	0	1	0	1	1	0	0	0	1	0	0	1		0	0	1	0	0	0	0	1	1	1	1	0	1	1	0	0	1	0	0
		-0.216862	1	1	0	1	0	0	0	1	1	1	0	0	1	0	0	1	1	1	0		1	0	0	1	1	1	0	1	1	0	0	1	0	1	1	1	1	0	0
		-0.204725	0	1	0	1	1	0	0	0	0	0	1	1	1	1	1	1	0	0	0		0	1	1	1	1	0	1	1	0	0	1	1	1	0	1	0	0	0	1
		-0.192556	0	1	1	1	1	0	1	0	0	1	0	0	0	1	1	0	1	1	0		1	1	0	1	0	1	1	0	0	0	0	0	1	1	1	1	0	0	0
		-0.180356	1	0	1	0	0	1	1	1	0	1	0	1	0	1	0	1	0	0	1		0	1	0	0	0	1	0	0	0	1	1	0	0	0	0	1	0	1	1
		-0.168128	0	1	1	1	1	1	0	1	1	0	0	0	0	0	0	0	1	0	1		0	0	1	0	0	1	1	0	1	1	0	0	0	1	1	1	1	0	1
		-0.155873	0	1	0	0	0	1	0	0	1	1	0	1	0	0	1	0	0	0	1		1	0	0	0	1	0	1	0	1	1	1	1	0	0	0	0	1	1	1
		-0.143594	0	0	1	0	1	0	1	1	1	0	1	1	1	1	1	0	1	0	0		0	0	0	1	1	0	1	1	0	0	1	1	1	1	0	0	1	1	1
		-0.131292	0	0	0	0	0	1	1	0	0	0	1	0	1	1	0	1	1	1	0		1	0	1	1	1	0	0	0	0	0	0	1	1	0	1	0	0	1	0
		-0.118969	1	1	0	1	0	0	1	0	1	1	0	0	1	1	0	0	0	1	0		0	1	1	0	0	1	0	1	1	0	0	0	1	1	0	1	1	0	1
		-0.106628	1	0	0	1	0	1	0	1	1	0	1	0	0	0	1	0	0	0	1		1	0	0	1	1	1	1	1	1	1	0	1	0	1	1	1	0	0	0
		-0.0942694	1	0	1	1	0	1	0	0	0	1	0	1	0	1	1	1	0	1	1		1	1	1	0	0	0	0	1	0	1	1	0	1	0	1	0	1	1	0
		-0.0818962	1	1	1	0	1	0	0	1	0	0	1	1	1	0	0	1	0	0	1		0	1	0	0	0	1	1	0	0	0	1	0	1	1	1	1	1	1	0
		-0.06951	0	0	0	0	1	1	1	0	0	1	0	1	1	0	1	0	1	1	0		0	1	1	1	0	1	0	0	1	1	1	0	0	0	0	1	0	0	1
		-0.0571128	0	1	0	1	1	0	1	1	0	1	1	0	1	0	0	1	1	0	1		0	0	0	0	1	1	1	0	1	0	0	0	0	1	1	0	1	0	1
		-0.0447066	1	0	1	0	1	0	0	1	0	0	0	0	0	1	0	1	1	1	1		1	0	1	1	1	0	1	1	1	1	1	1	0	0	0	1	1	1	0
		-0.0322934	1	0	0	1	0	0	0	0	1	1	1	0	0	1	1	0	0	1	0		1	1	0	0	0	0	0	1	0	0	0	1	0	1	0	0	0	1	1
		-0.0198751	0	1	1	1	0	0	1	1	0	0	0	0	1	0	1	0	0	0	0		0	1	0	0	1	0	1	0	0	0	0	1	1	1	0	0	0	0	0
		-0.00745358	0	1	1	0	1	1	1	0	1	1	1	1	1	1	1	1	1	1	0		0	0	0	1	0	1	0	1	0	1	1	0	1	0	0	0	1	0	1
		0.00496908	1	0	1	0	0	1	0	0	1	1	1	1	0	0	0	1	1	0	0		0	0	0	0	1	1	1	1	1	1	0	1	0	0	1	1	0	0	1
		0.017391	1	1	0	0	1	1	0	1	1	0	0	0	0	0	0	0	0	0	1		1	1	1	1	1	0	1	0	1	1	1	0	1	0	1	0	0	1	1
		0.0298101	0	1	1	1	0	1	1	0	1	1	0	1	1	0	1	1	1	1	1		1	1	1	1	0	0	0	0	0	0	1	0	1	0	1	1	1	1	0
		0.0422245	0	1	0	1	1	0	1	1	0	0	0	1	0	1	0	0	0	0	1		1	0	1	1	1	0	0	1	1	0	1	1	1	1	0	1	0	1	0
		0.0546323	1	0	0	0	0	0	0	1	0	0	1	1	1	1	0	1	1	1	0		0	1	0	0	0	1	0	1	0	1	0	0	0	1	1	0	1	0	0
		0.0670314	1	0	0	1	1	1	0	0	1	1	1	1	1	1	0	0	1	1	1		1	0	1	0	1	1	0	0	1	1	0	1	0	1	1	1	0	1	1
		0.0794199	1	0	0	0	0	1	0	1	0	0	1	0	0	0	1	1	0	1	1		1	1	0	0	1	0	1	1	0	1	0	1	1	0	1	0	0	0	1
		0.0917959	0	1	1	1	0	0	1	0	1	1	0	1	0	0	1	0	0	0	1		0	0	1	1	0	1	1	0	1	0	0	1	1	1	0	1	1	1	0
		0.104157	0	1	1	1	1	0	1	1	0	0	1	1	0	1	1	0	0	0	0		0	1	0	0	0	1	0	0	0	0	1	0	0	0	0	1	0	0	1
		0.116502	1	0	1	0	1	1	0	0	1	1	0	0	1	1	0	1	0	0	0		0	0	1	1	0	0	1	1	0	0	0	1	1	1	0	1	1	1	1
		0.128829	0	0	1	0	1	1	0	1	1	0	1	0	0	1	0	1	1	1	0		1	1	0	0	1	1	1	1	1	1	1	0	0	0	1	0	1	0	0
		0.141135	0	1	0	0	0	0	0	0	0	0	0	0	1	0	1	1	1	1	0		1	0	1	1	1	0	0	1	0	1	1	1	1	0	1	0	1	0	0
		0.153419	1	1	0	1	0	1	1	0	1	0	0	0	0	1	0	0	0	0	1		1	1	1	1	0	1	1	0	1	0	1	0	1	1	0	1	0	1	0
		0.165679	0	0	0	1	1	0	1	0	0	0	0	1	1	0	0	0	1	1	1		0	1	0	0	1	1	0	0	1	1	1	1	0	1	0	1	0	0	0
		0.177913	1	0	1	0	0	1	1	1	0	1	1	1	0	1	1	1	1	0	0		1	0	0	1	0	0	0	0	1	1	0	1	0	1	1	1	1	1	1
		0.190118	1	0	1	1	0	1	1	1	0	1	1	0	1	0	0	0	1	1	1		1	0	1	1	0	0	0	1	0	1	0	0	0	0	1	0	1	1	1
		0.202294	1	1	0	0	0	0	0	1	1	0	0	0	0	1	1	0	0	1	1		1	1	1	1	1	1	1	0	0	0	1	1	1	0	0	0	0	1	0
		0.214438	0	1	1	0	1	0	0	0	1	1	1	1	1	0	1	1	1	0	1		0	1	1	0	0	0	0	1	1	0	1	0	1	0	1	1	1	0	1
		0.226547	0	0	1	0	1	0	0	1	0	1	0	1	1	1	1	0	0	0	1		0	0	0	0	1	1	1	1	1	0	1	1	0	1	0	0	0	0	1
		0.238621	0	1	0	0	1	1	1	1	1	1	1	1	1	1	0	1	0	0	0		0	1	0	1	1	0	1	0	0	1	0	1	1	0	0	0	1	0	1
		0.250657	1	0	0	1	1	1	1	0	1	0	1	0	0	0	0	1	1	1	0		1	1	1	1	0	0	1	1	0	1	0	0	0	1	0	1	1	1	0
		0.262654	1	1	0	1	0	0	0	0	0	0	1	0	1	0	1	0	0	1	1		1	0	1	0	1	1	0	0	1	0	1	0	1	1	0	1	0	1	0
		0.274609	1	1	1	1	0	0	1	0	0	0	0	1	0	0	1	1	1	0	0		0	0	0	0	0	1	0	1	1	1	1	1	0	1	1	1	1	0	0
		0.286521	0	1	1	0	1	1	0	0	1	1	0	0	0	0	0	0	1	0	0		1	0	1	1	1	1	1	1	1	1	0	0	1	0	1	0	0	1	1
		0.298388	1	0	1	0	1	1	1	1	0	1	1	1	1	0	1	1	0	1	0		1	1	0	1	0	0	1	1	0	0	0	0	1	0	1	0	1	1	1
		0.310207	1	1	0	1	0	0	1	1	1	1	1	0	1	1	0	0	1	1	0		1	1	0	1	1	1	1	0	1	0	0	0	0	0	1	1	0	1	0
		0.321978	0	0	0	1	0	1	0	0	1	0	0	1	0	0	1	1	0	1	1		0	1	1	0	0	1	0	0	0	0	1	0	1	1	0	1	1	0	1
		0.333697	0	0	1	1	0	0	0	1	1	1	1	1	1	1	1	1	0	0	1		0	0	0	0	1	0	0	1	0	1	0	1	0	1	0	0	1	1	0
		0.345364	1	1	1	1	1	1	1	1	0	1	0	0	1	1	0	0	1	1	1		0	0	1	0	1	0	1	0	1	1	1	1	0	0	1	0	0	1	1
		0.356977	0	0	0	0	1	1	1	1	1	1	1	1	0	1	0	0	1	0	0		1	1	1	1	0	0	1	1	0	1	1	1	0	1	1	1	1	0	0
		0.368533	0	1	1	1	1	0	1	0	0	0	1	0	0	1	0	1	1	1	0		1	1	0	1	0	1	1	0	1	0	1	1	1	1	0	1	0	1	1
		0.380031	1	0	0	0	0	1	0	1	0	0	0	1	0	0	1	1	0	1	1		0	1	0	1	0	1	0	1	1	1	1	0	0	1	1	1	1	0	1
		0.391468	1	1	1	1	0	0	1	0	0	1	0	0	1	1	1	0	0	0	1		1	0	0	0	1	1	1	1	1	0	0	1	1	0	1	1	0	1	1
		0.402845	0	1	0	0	1	0	0	1	0	0	1	1	1	1	1	1	0	0	1		0	1	1	1	1	0	0	0	0	0	1	1	1	0	0	0	0	0	0
		0.414157	1	0	1	1	1	1	1	1	1	1	1	1	1	1	1	0	1	1	0		1	0	1	1	1	1	1	0	0	0	1	1	1	1	0	0	0	0	0
		0.425404	1	1	1	0	1	0	0	0	1	0	1	0	0	0	0	1	1	0	1		0	0	1	0	0	1	0	0	0	1	0	0	1	0	0	0	1	1	1
		0.436584	1	0	0	1	0	1	1	0	1	1	0	1	1	0	1	0	0	1	0		0	0	0	0	1	0	0	1	1	1	0	1	0	1	1	1	1	0	1
		0.447695	0	0	1	1	1	0	0	1	1	0	0	0	0	0	0	0	1	0	1		1	1	1	1	1	1	0	1	1	1	1	0	0	0	1	1	1	1	1
		0.458735	1	1	0	0	1	1	0	0	0	1	1	1	0	1	1	1	0	1	0		1	1	0	0	1	0	1	1	0	1	0	0	1	1	1	0	1	1	0
		0.469703	0	0	1	0	0	0	1	1	1	1	0	1	0	1	1	0	1	1	1		1	1	1	0	0	0	1	0	1	0	1	0	1	1	0	1	0	1	1
		0.480596	1	1	0	1	1	0	1	1	1	0	1	0	0	0	0	1	1	1	0		0	0	0	1	0	0	0	1	1	1	1	0	0	1	0	0	1	0	0
		0.491414	1	1	1	0	0	1	0	0	0	1	0	1	1	0	1	1	0	0	0		1	0	1	1	0	1	1	1	1	1	0	1	1	0	1	1	1	1	0
		0.502154	0	1	0	1	0	0	1	0	0	1	1	1	1	1	0	1	0	0	1		1	1	1	0	1	0	1	0	0	0	1	1	0	0	1	0	1	0	1
		0.512815	0	1	1	0	0	1	1	1	1	0	0	0	1	1	0	0	1	1	0		1	0	0	0	1	1	1	1	1	1	0	1	1	0	0	1	0	1	0
		0.523395	1	0	0	1	1	1	0	1	1	1	1	0	1	1	0	1	1	1	1		0	0	1	0	0	1	0	0	0	0	0	0	1	1	0	1	0	1	1
		0.533892	0	0	1	1	1	1	1	0	1	0	0	1	1	0	0	0	1	1	0		1	0	0	1	0	0	1	1	0	1	1	1	0	1	1	1	0	0	1
		0.544305	1	1	0	0	0	1	0	1	0	1	0	0	0	1	1	1	0	0	1		0	1	1	1	1	1	0	1	1	1	0	1	0	0	1	0	1	0	1
		0.554632	0	0	0	1	1	0	0	0	0	0	1	0	1	1	1	0	0	0	1		0	1	1	1	1	0	1	1	0	0	1	0	1	1	1	0	1	1	0
		0.564871	1	0	1	0	1	0	1	0	0	0	1	1	0	0	1	1	1	1	1		1	1	0	1	1	1	0	0	1	0	1	1	1	1	0	0	0	1	0
		0.575019	1	0	1	0	1	1	1	1	1	0	0	1	0	0	0	0	1	1	0		0	1	1	0	0	1	1	1	1	1	1	0	0	0	1	1	1	0	1
		0.585072	0	1	0	1	1	0	1	1	1	0	1	0	1	0	1	1	1	0	1		1	0	0	1	1	1	0	1	0	1	0	1	1	1	1	1	1	0	1
		0.595023	1	1	1	1	0	1	0	0	1	1	0	1	0	1	0	1	0	0	0		1	1	1	1	1	0	0	0	1	0	0	1	1	0	0	0	1	1	1
		0.604876	0	1	1	1	0	0	1	1	0	1	1	0	1	1	1	0	0	1	1		1	1	1	0	1	1	1	0	0	0	0	1	0	1	0	1	0	1	0
		0.614648	0	0	0	0	1	1	0	1	0	1	0	1	1	0	1	0	0	0	1		0	1	1	0	0	1	0	0	1	0	1	0	1	0	0	1	1	1	0
		0.624428	1	0	0	1	1	1	1	0	1	1	1	1	0	0	0	1	1	1	0		0	0	0	1	0	0	1	1	1	1	1	0	0	1	1	1	0	0	1
		0.634509	1	1	0	0	0	1	1	0	1	0	1	0	0	0	1	1	1	0	1		1	0	0	1	1	1	1	1	1	1	0	1	1	1	1	0	0	1	1
		0.645653	1	1	1	0	0	1	0	0	1	1	0	1	1	1	1	1	0	1	1		1	1	1	1	1	0	0	0	0	1	1	1	1	0	1	0	1	0	0
		0.659551	0	1	1	1	0	0	1	1	0	1	1	1	0	1	0	0	1	0	0		1	1	0	1	0	0	1	0	1	0	0	1	0	1	0	1	0	1	1
		0.679361	0	1	1	0	1	0	0	1	1	1	1	0	1	1	1	1	0	1	1		0	0	0	0	0	1	0	0	1	1	1	0	0	0	1	1	1	0	1
		0.709977	1	0	1	1	1	1	1	1	1	1	1	0	1	1	0	1	1	0	0		0	0	0	1	0	1	1	1	0	1	0	0	0	1	0	0	1	1	0
		0.757217	1	1	0	1	1	1	0	1	0	0	1	1	0	0	1	0	1	1	1		1	1	1	0	1	1	1	1	0	1	1	0	1	0	1	0	1	0	1
		0.824566	1	1	1	1	0	0	1	0	1	0	0	1	1	1	1	1	0	1	1		1	1	1	0	1	0	1	1	0	1	1	1	1	1	1	1	0	1	0
		0.906038	0	0	1	1	1	1	0	1	0	1	0	1	1	1	0	0	1	0	0		1	1	1	1	1	1	0	0	1	0	1	1	1	1	0	1	0	1	1
		0.976327	1	0	0	0	1	0	1	0	1	0	1	0	0	1	1	1	0	1	0		0	0	0	0	0	1	1	1	1	1	0	0	0	1	1	1	1	0	0
		0.987002	0	0	0	1	0	0	1	0	0	0	0	0	0	0	0	0	0	0	0		0	1	1	1	1	1	1	1	1	1	1	1	1	0	1	1	1	1	1
		0.883941	0	0	0	0	0	0	0	0	0	0	0	0	0	0	0	0	0	0	0		1	1	1	1	1	0	0	1	0	0	1	1	1	1	1	0	1	1	1
		0.647494	0	0	0	0	0	0	0	0	0	0	0	0	0	0	0	0	0	0	0		1	1	1	1	1	1	1	1	1	0	1	1	1	1	0	1	0	1	0
		0.320373	0	0	0	0	0	0	0	0	0	0	0	0	0	0	0	0	0	0	0		0	1	0	0	0	1	0	0	0	0	1	0	0	1	1	1	1	0	1
		-0.0155335	0	0	0	0	0	0	0	0	0	0	0	0	1	0	0	0	0	0	0		1	0	0	1	1	0	1	1	0	0	0	1	0	0	0	0	1	1	1
		-0.293011	0	0	0	0	0	0	0	0	0	0	0	0	0	0	0	0	0	0	0		0	0	0	0	0	0	0	0	1	1	0	1	0	0	0	0	0	0	0
		-0.488475	0	0	0	0	0	0	0	0	0	0	0	0	0	0	0	0	0	0	0		0	0	0	0	0	0	0	0	0	0	0	0	0	0	1	0	0	0	0
		-0.611851	0	0	0	0	0	0	0	0	0	0	0	0	0	0	0	0	0	0	0		0	0	0	0	0	0	0	0	0	0	0	0	1	0	0	0	0	0	0
		-0.684486	0	0	0	0	0	0	0	0	0	0	0	0	0	0	0	0	0	0	0		0	0	0	0	0	0	0	0	0	0	0	0	0	0	0	0	0	0	0
		-0.72574	0	0	0	0	0	0	0	0	0	0	0	0	0	0	0	0	0	0	0		0	0	0	0	0	0	0	0	0	0	0	0	0	0	0	0	0	0	0
		-0.749312	0	0	0	0	0	1	0	1	0	0	0	0	0	0	0	0	1	0	0		0	0	0	0	0	0	0	0	0	0	0	0	0	0	0	0	0	0	0
		-0.763785	0	1	0	0	0	1	0	0	0	0	0	0	1	0	0	1	0	0	1		1	0	0	0	0	0	0	0	0	0	0	0	0	1	0	0	0	0	0
		-0.774013	0	1	1	0	0	0	0	1	0	1	1	1	1	0	0	0	1	0	1		0	0	0	0	0	0	0	0	0	0	0	0	0	1	0	0	0	0	0
		-0.782441	0	0	1	0	1	1	0	0	0	0	1	1	1	1	1	1	1	1	1		1	0	0	0	0	0	0	0	0	0	0	0	0	0	0	0	0	0	0
		-0.79015	0	1	1	1	1	0	1	1	1	1	0	1	0	1	1	0	0	1	0		0	0	0	0	0	0	1	0	0	1	0	0	0	0	0	0	0	0	0
		-0.797565	1	0	0	1	1	0	1	0	1	0	0	0	0	0	0	1	0	1	0		0	1	1	0	0	1	1	1	0	1	0	1	0	0	1	1	0	1	0
		-0.804824	1	0	0	1	0	0	0	0	1	1	0	0	0	0	1	0	1	0	1		0	1	1	0	0	1	0	0	0	0	1	0	1	0	0	0	1	1	0
		-0.811958	0	0	0	1	1	0	1	0	0	0	0	0	0	0	0	0	0	0	1		0	0	0	1	1	0	0	1	1	0	1	0	0	0	1	1	1	0	1
		-0.818971	1	0	0	0	0	0	0	0	1	0	1	1	1	1	1	0	0	0	0		0	0	1	1	1	0	0	1	1	1	0	1	1	0	0	0	1	0	1
		-0.825861	0	1	1	0	0	1	0	0	0	1	1	1	0	1	0	1	0	1	0		0	1	1	0	0	0	0	0	0	0	1	0	1	1	0	1	0	0	0
		-0.832623	1	1	0	0	0	1	0	1	0	0	0	0	0	0	0	1	0	1	0		1	0	0	0	0	0	0	0	1	0	1	0	0	1	0	0	0	1	1
		-0.839254	0	0	1	0	0	0	0	1	0	1	0	0	0	0	0	0	0	0	0		0	0	0	0	0	0	0	0	0	1	0	0	0	0	0	0	0	0	0
		-0.845753	0	0	0	0	0	0	1	0	0	0	1	1	1	0	0	0	1	0	0		1	1	0	0	1	1	1	0	1	0	0	0	0	0	1	0	0	1	0
		-0.852118	0	0	0	0	0	0	1	1	0	0	1	0	1	0	0	0	1	1	0		0	1	1	1	1	1	1	0	0	0	0	1	0	0	0	0	0	0	0
		-0.858348	0	0	0	0	1	0	0	1	0	0	0	0	0	0	0	0	1	0	0		1	0	0	1	0	0	0	0	1	0	0	1	1	0	0	1	1	0	0
		-0.864443	1	0	0	1	0	1	0	0	1	0	0	0	0	0	1	0	0	0	1		0	0	0	0	1	1	1	1	1	0	0	0	1	1	0	1	0	0	1
		-0.870401	0	1	0	1	1	1	0	0	1	0	0	0	0	1	1	1	0	0	1		0	0	0	1	0	0	0	1	0	0	1	0	0	1	1	1	1	0	1
		-0.876222	1	1	1	1	0	0	1	0	1	1	0	0	1	1	0	0	0	0	1		0	0	0	1	1	0	1	0	0	1	0	0	0	1	1	0	0	0	1
		-0.881905	0	0	1	0	0	0	1	0	0	1	0	0	1	1	0	1	0	1	0		0	1	1	1	1	0	0	1	0	1	1	0	1	0	1	0	0	1	0
		-0.887448	1	1	1	0	1	0	0	0	0	0	1	0	0	0	0	1	1	1	0		1	0	1	0	0	0	0	0	0	0	1	1	0	1	0	0	0	1	0
		-0.892851	0	0	0	0	1	1	0	0	1	0	0	1	1	0	1	0	0	0	0		0	0	0	0	0	1	0	1	0	0	0	0	1	0	0	0	0	0	0
		-0.898113	1	0	0	0	0	1	0	0	0	0	1	1	0	0	1	0	1	0	0		1	0	0	0	0	1	1	0	1	1	0	1	0	0	0	0	1	0	0
		-0.903234	0	0	0	1	0	0	1	1	0	0	0	1	0	0	1	0	0	0	1		0	0	0	0	0	0	0	0	1	1	0	0	1	0	0	0	1	1	1
		-0.908211	1	0	0	0	0	0	0	1	0	1	0	0	0	1	0	0	1	0	0		0	0	0	0	0	0	0	0	0	0	0	1	0	0	1	1	0	1	0
		-0.913046	0	0	1	1	1	0	1	1	1	1	1	0	0	0	0	0	0	1	1		0	1	1	0	0	0	1	0	0	0	1	0	0	0	0	1	1	0	1
		-0.917736	0	1	0	0	0	0	1	0	0	0	0	0	0	1	0	1	0	1	0		0	0	0	0	0	1	0	0	0	0	1	0	0	0	1	1	0	0	0
		-0.922281	0	1	1	1	1	0	0	0	0	1	0	0	1	0	0	1	0	0	0		1	1	1	1	1	1	1	1	0	0	0	0	1	1	0	0	0	1	1
		-0.92668	0	0	1	0	0	0	1	0	0	0	1	1	1	0	0	0	0	1	0		1	1	0	1	1	0	0	1	0	0	1	1	1	0	1	0	1	1	0
		-0.930934	0	0	0	1	0	1	0	0	0	0	1	1	1	0	1	1	1	0	0		1	1	0	1	0	0	0	0	1	0	0	1	0	1	1	0	0	0	1
		-0.93504	0	0	0	0	0	1	0	1	1	0	0	0	0	0	0	0	1	0	0		0	0	0	0	0	0	1	1	1	1	0	0	0	1	0	0	1	0	0
		-0.938998	1	0	0	0	0	1	0	1	1	0	0	1	0	0	1	0	0	0	1		1	0	0	0	1	1	0	0	1	1	0	0	0	1	0	1	0	0	0
		-0.942809	0	1	0	0	0	0	0	0	1	1	0	0	0	1	1	0	0	0	1		0	0	0	0	0	1	1	0	0	1	0	0	1	0	0	0	0	0	0
		-0.94647	1	1	1	1	1	0	0	0	0	1	0	0	0	1	0	0	0	0	1		0	0	1	0	0	0	0	0	0	0	1	1	0	0	1	1	0	0	0
		-0.949982	0	0	1	0	1	0	0	0	0	0	0	0	0	1	0	0	0	1	0		0	0	1	0	0	0	0	0	0	0	0	0	0	0	0	1	0	0	0
		-0.953344	1	1	1	1	0	1	1	0	0	0	1	0	0	0	0	1	1	1	0		0	0	0	0	1	0	0	1	1	0	0	0	0	0	0	1	1	1	1
		-0.956555	1	0	0	0	1	0	0	1	0	0	0	0	1	0	0	1	0	1	1		1	0	1	1	1	0	0	1	1	0	0	1	0	1	0	0	1	1	1
		-0.959616	0	0	0	0	0	0	1	0	0	1	1	0	1	1	1	1	1	0	1		1	1	1	1	0	0	0	0	0	1	1	0	1	0	0	0	1	0	0
		-0.962524	0	0	0	0	1	0	0	1	0	0	0	1	1	0	1	0	0	0	0		0	1	0	0	0	0	1	0	1	0	1	0	1	1	0	0	0	0	0
		-0.965281	0	0	0	0	0	0	0	1	1	1	0	1	0	0	1	0	0	0	0		0	1	0	0	0	1	0	1	0	1	1	0	0	1	0	0	0	1	0
		-0.967885	0	1	0	0	0	1	1	0	1	0	1	0	0	0	0	1	1	0	0		0	0	1	1	0	1	1	0	0	1	0	0	0	0	1	0	1	0	0
		-0.970337	0	1	1	1	0	1	0	0	1	1	0	1	0	0	0	0	0	0	0		1	1	0	1	1	0	0	0	0	0	0	1	0	0	1	0	0	1	1
		-0.972635	1	1	1	1	1	0	1	0	0	0	1	0	1	1	1	0	0	0	0		1	0	1	0	1	0	1	1	0	0	0	1	0	0	1	1	0	1	0
		-0.97478	0	0	0	0	1	0	0	1	0	0	0	1	1	1	0	0	1	1	1		0	0	0	0	1	0	1	0	1	0	0	1	1	0	0	1	0	0	1
		-0.976771	1	0	0	0	0	1	0	0	0	0	0	0	0	0	0	1	1	1	0		0	0	0	0	0	0	0	1	1	1	1	0	0	0	1	1	0	0	1
		-0.978607	0	0	0	1	0	1	0	1	0	0	1	1	0	0	0	1	0	0	1		0	1	0	0	0	1	0	1	0	0	0	0	1	1	0	0	0	0	0
		-0.980289	1	0	0	1	0	0	0	0	0	0	0	0	0	0	1	0	0	0	0		0	0	0	0	0	1	0	0	0	0	0	0	0	0	0	0	1	0	0
		-0.981816	0	1	0	1	0	0	0	0	1	0	1	0	1	1	0	0	0	0	0		1	0	1	1	0	0	0	0	0	0	0	1	1	1	0	0	0	0	0
		-0.983189	1	0	1	0	0	0	1	0	0	1	1	0	0	1	0	0	1	0	0		0	0	0	0	0	1	1	0	0	1	0	0	1	1	0	1	1	0	1
		-0.984406	0	1	1	0	1	0	1	0	1	1	0	0	1	0	1	1	0	1	0		1	0	1	1	1	1	0	0	0	1	1	1	0	0	1	1	1	1	1
		-0.985467	0	0	0	0	1	1	1	1	0	0	0	0	0	0	0	0	0	1	1		0	1	1	1	1	0	1	1	1	0	0	0	0	0	1	0	1	1	0
		-0.986373	0	0	1	0	0	1	0	0	0	1	0	0	0	0	1	1	0	1	1		0	1	0	0	0	0	0	1	0	0	1	0	0	0	1	0	0	1	0
		-0.987123	0	0	0	0	1	0	1	1	1	1	0	1	0	0	0	0	1	0	0		1	1	0	0	0	0	0	0	1	0	1	0	0	0	0	0	1	0	0
		-0.987717	1	1	1	0	0	0	0	0	0	0	0	1	0	0	0	1	1	0	0		0	0	0	0	0	0	0	0	0	1	1	0	0	1	0	0	0	0	1
		-0.988155	1	0	0	0	0	0	0	0	1	0	1	0	0	1	0	0	1	0	0		0	0	0	0	0	1	1	0	1	1	0	1	1	1	1	1	0	0	1
		-0.988438	1	1	0	1	0	0	0	0	0	0	1	0	1	1	0	0	0	0	1		1	0	1	1	1	0	1	0	0	0	0	1	1	0	0	0	0	1	0
		-0.988564	0	0	0	1	0	0	0	1	0	0	0	0	0	0	0	0	0	1	1		1	1	1	1	1	0	1	1	0	0	0	1	0	0	0	1	0	1	1
		-0.988534	0	1	0	1	0	0	0	0	1	1	0	1	1	1	1	0	0	0	0		0	0	0	0	0	0	0	0	1	0	0	0	1	0	0	0	1	0	0
		-0.988347	0	0	1	0	1	1	1	1	0	0	0	1	1	0	1	0	0	1	1		0	1	1	0	0	1	0	1	0	0	1	0	0	1	0	1	0	1	0
		-0.988005	0	0	1	1	1	1	1	0	1	1	1	1	0	1	0	1	0	1	0		0	0	0	0	0	1	0	0	0	1	0	0	1	0	0	0	1	0	0
		-0.987507	0	1	0	0	0	1	1	0	0	0	1	0	0	0	1	1	1	0	1		0	0	0	1	1	0	0	0	0	1	1	0	0	1	1	1	0	0	0
		-0.986853	0	0	1	0	1	0	0	0	1	1	0	0	0	0	0	0	0	0	0		1	0	0	0	1	0	1	0	1	0	0	1	0	0	0	0	0	0	1
		-0.986043	1	0	0	0	0	1	0	0	0	1	0	1	0	0	0	1	1	0	0		0	0	0	1	0	1	0	0	1	0	0	0	0	1	1	0	0	0	1
		-0.985077	1	0	0	0	1	0	0	1	0	0	0	0	1	1	0	0	1	0	0		1	0	1	0	0	1	0	1	0	1	1	1	1	0	1	0	1	0	1
		-0.983956	1	1	0	0	0	1	0	1	0	0	1	0	1	1	0	1	0	0	1		1	1	1	0	0	0	0	1	1	0	0	1	0	0	0	0	1	0	0
		-0.982679	0	0	0	0	0	0	1	1	0	0	1	0	0	0	0	0	0	1	1		0	1	0	0	1	0	1	1	0	0	1	0	0	0	0	1	0	1	0
		-0.981248	0	0	0	1	0	0	0	0	1	0	0	0	1	0	1	0	0	1	0		0	0	0	1	0	0	0	0	0	0	1	0	1	0	0	1	0	0	0
		-0.979661	0	0	1	1	1	0	1	1	1	1	1	1	0	0	1	0	0	0	0		0	0	0	1	1	1	1	0	1	1	0	0	0	0	1	0	0	1	1
		-0.97792	0	0	1	0	1	0	0	0	0	1	0	1	0	0	0	0	1	1	0		1	1	1	0	0	0	1	1	1	1	0	0	1	1	1	0	1	0	1
		-0.976024	0	0	0	0	1	0	0	0	1	0	0	0	1	1	1	1	1	0	0		1	0	1	0	0	0	0	0	0	0	0	1	1	0	0	0	0	0	0
		-0.973974	1	1	1	0	0	1	0	0	0	0	0	0	0	0	0	1	0	1	0		0	0	1	0	0	0	0	0	0	0	0	1	0	1	0	1	1	1	0
		-0.97177	0	1	0	1	0	1	0	0	0	0	0	0	0	1	1	1	1	0	1		0	0	0	0	0	0	0	0	0	0	0	0	0	1	0	1	0	0	0
		-0.969413	1	1	0	1	0	0	1	0	1	0	0	0	1	0	1	0	0	1	1		0	0	0	1	1	1	0	1	0	1	0	1	1	0	1	0	0	1	1
		-0.966902	0	0	0	0	0	1	1	1	0	0	1	1	0	1	0	0	0	0	1		0	1	0	1	1	1	1	1	1	0	1	0	0	0	1	0	1	1	1
		-0.964239	1	0	0	1	0	1	0	0	1	1	1	1	0	1	0	0	0	0	0		0	1	0	1	1	0	1	0	0	0	1	0	0	0	0	1	0	0	0
		-0.961424	0	0	0	0	0	0	0	1	0	0	0	0	0	0	0	0	0	0	0		0	0	0	0	0	1	0	0	1	0	0	0	0	0	0	1	0	0	0
		-0.958457	0	1	1	0	1	0	0	0	0	1	1	1	0	0	0	0	0	0	0		1	1	0	0	0	1	0	0	0	1	1	0	0	1	0	0	0	1	0
		-0.955338	1	1	1	0	1	0	1	1	0	1	0	1	1	0	0	0	1	0	1		1	1	1	0	0	0	0	1	0	1	0	0	0	1	1	0	1	0	0
		-0.952069	0	0	1	0	1	0	0	0	0	0	0	0	1	0	1	1	1	1	0		1	0	1	0	0	0	1	0	0	0	1	0	1	0	1	0	1	0	0
		-0.94865	1	0	0	1	0	0	1	0	0	0	0	0	0	0	1	1	1	1	1		0	0	0	0	1	0	1	0	1	0	0	1	1	0	0	0	0	1	1
		-0.94508	0	0	0	1	0	0	1	1	1	0	0	0	0	0	0	0	1	1	0		0	0	0	0	0	0	0	1	0	0	0	0	1	0	0	1	1	0	1
		-0.941361	0	1	0	1	0	0	0	0	1	0	0	0	0	0	1	0	0	0	0		0	0	0	1	1	1	0	0	0	1	0	1	0	1	0	0	0	0	1
		-0.937494	0	1	0	0	0	1	0	1	0	0	1	0	1	1	0	0	0	0	1		1	1	1	1	1	1	0	0	1	1	0	1	1	0	1	1	0	1	0
		-0.933479	0	0	0	0	0	0	0	0	0	1	1	0	1	1	0	0	0	1	0		1	1	1	1	1	0	1	1	0	0	1	1	0	1	1	0	0	0	0
		-0.929316	1	1	0	0	1	1	0	0	1	1	1	0	0	1	0	1	1	0	0		0	0	0	0	0	0	0	0	1	0	1	0	0	1	0	0	1	0	0
		-0.925006	1	0	1	0	1	1	1	0	1	0	0	1	0	0	0	1	1	1	0		1	1	0	0	0	0	1	1	1	0	0	0	0	0	0	1	1	1	1
		-0.920551	0	0	1	0	0	0	0	0	0	1	0	1	0	1	0	1	0	0	1		0	0	0	1	0	0	0	1	1	1	0	0	0	0	0	0	1	1	1
		-0.91595	0	1	1	1	1	0	1	1	0	1	0	1	0	0	1	0	1	0	1		0	1	0	1	0	0	1	0	0	1	0	0	1	0	0	1	0	0	0
		-0.911204	1	0	1	0	0	0	1	1	0	0	0	1	1	0	1	0	0	0	0		0	0	1	0	0	0	0	1	0	0	1	1	1	1	0	1	0	0	0
		-0.906315	1	1	0	1	0	1	1	1	0	0	1	0	1	1	0	0	0	0	0		0	0	0	1	0	1	0	0	0	0	1	1	1	1	0	1	0	0	0
		-0.901282	0	0	0	1	0	1	0	0	1	0	1	1	0	0	1	1	0	1	0		1	0	1	0	1	1	0	1	0	0	1	0	0	0	1	0	0	0	0
		-0.896107	1	0	0	0	1	1	0	0	1	0	0	0	1	1	0	1	0	1	1		1	0	0	0	1	1	1	0	0	0	0	0	0	0	1	0	0	1	0
		-0.890791	0	0	1	0	1	0	0	0	1	1	1	0	1	0	1	0	0	0	1		0	0	0	1	1	0	1	0	1	1	1	1	0	0	1	0	0	1	0
		-0.885333	0	0	0	1	1	0	0	0	0	1	0	1	0	0	0	0	1	0	0		0	0	0	0	0	1	0	0	0	0	0	1	0	1	0	0	1	0	0
		-0.879737	0	0	0	1	0	0	1	1	1	0	1	0	0	0	0	1	1	0	0		0	1	1	1	0	0	0	0	0	1	0	0	0	1	0	0	1	0	1
		-0.874001	0	1	0	0	0	0	1	1	0	0	0	1	0	0	0	1	0	1	0		1	1	1	0	0	0	0	0	1	1	0	0	1	0	1	0	1	1	1
		-0.868127	0	1	1	0	0	1	0	0	0	0	0	0	0	0	0	1	1	0	1		1	1	1	0	1	0	1	1	0	0	0	0	1	0	0	0	0	0	0
		-0.862116	1	1	1	0	0	0	1	0	0	1	0	0	1	1	1	0	0	1	1		0	0	0	0	0	1	1	1	1	0	0	0	0	0	0	1	1	0	1
		-0.855969	1	0	0	0	1	1	0	0	0	1	0	0	1	1	1	0	0	1	0		0	0	0	0	0	1	0	0	1	0	1	0	1	1	0	1	0	0	1
		-0.849687	1	1	0	0	1	0	0	1	1	0	1	0	0	1	0	0	1	0	0		0	0	1	1	0	0	1	1	0	1	0	1	0	1	1	1	0	1	1
		-0.84327	0	0	1	1	0	1	0	1	1	0	1	1	0	0	1	0	0	0	0		0	0	0	1	1	0	1	0	0	1	0	1	1	0	1	0	0	1	0
		-0.836721	0	0	1	1	1	1	0	0	0	1	0	1	1	1	0	1	1	0	0		1	0	0	0	1	0	0	1	0	1	0	1	1	0	1	1	0	1	0
		-0.830039	0	0	0	0	0	0	0	1	0	1	1	0	0	0	1	0	1	0	1		1	0	0	0	1	0	0	0	0	0	1	0	0	0	0	0	1	0	0
		-0.823226	0	1	0	1	0	0	1	1	1	0	0	1	1	0	0	1	0	0	0		0	1	1	0	0	0	0	0	1	0	1	0	0	1	1	0	1	0	0
		-0.816283	0	1	0	0	0	1	1	0	1	0	0	0	0	0	1	0	0	1	1		0	1	1	0	1	1	0	0	1	0	0	0	0	1	0	0	0	0	1
		-0.809212	0	0	0	0	0	1	1	0	0	1	0	0	1	1	0	0	0	1	1		1	1	0	1	0	1	0	0	0	0	1	0	0	0	0	1	0	1	0
		-0.802012	1	0	1	0	0	0	0	0	0	1	1	0	0	1	0	0	0	0	0		1	0	1	1	0	0	1	1	1	1	1	1	1	0	0	1	0	1	1
		-0.794686	1	0	1	0	1	0	1	0	0	0	1	1	0	1	0	0	1	0	1		0	0	0	0	0	1	0	0	0	0	0	1	1	1	0	0	1	0	0
		-0.787234	1	1	0	1	1	0	0	1	0	0	0	0	0	0	0	1	1	0	0		0	1	0	1	0	1	1	1	0	1	0	0	0	1	1	1	1	0	1
		-0.779658	0	1	0	0	1	0	0	0	0	0	1	1	0	0	1	1	0	1	0		0	1	1	1	1	0	1	1	0	1	0	1	1	0	1	0	0	1	0
		-0.771959	0	0	0	1	0	0	0	1	1	0	0	0	0	0	0	1	0	1	0		0	0	1	0	1	0	0	0	0	1	1	0	0	0	0	0	0	1	1
		-0.764138	0	0	1	1	1	0	1	0	1	0	0	0	1	0	1	0	1	1	1		0	0	0	0	0	0	0	0	1	0	0	0	0	0	0	1	1	0	0
		-0.756197	0	0	0	0	0	0	1	1	0	0	0	0	1	1	1	0	0	0	0		0	0	0	0	0	0	0	0	1	0	0	0	0	0	1	1	1	0	0
		-0.748136	1	1	1	1	0	1	0	0	1	1	0	0	1	1	0	1	1	1	0		1	1	0	0	0	1	1	1	1	0	1	1	1	0	1	0	0	0	1
		-0.739957	1	1	0	0	1	1	1	0	1	1	1	1	0	0	1	0	0	1	1		1	0	0	1	0	1	1	1	0	0	0	1	1	0	0	0	0	0	1
		-0.731661	1	1	1	1	0	1	0	1	1	0	0	1	1	0	0	0	0	0	0		1	0	1	0	1	0	1	0	0	0	1	1	0	1	1	0	0	1	0
		-0.723249	0	0	1	0	1	1	0	0	0	1	1	1	0	0	0	1	0	0	1		0	0	0	1	0	1	0	0	0	0	1	0	0	1	0	0	0	0	1
		-0.714723	1	0	1	0	0	0	1	1	0	1	1	1	1	1	1	0	1	0	1		1	1	1	1	1	1	0	1	0	1	0	0	0	1	1	1	1	1	0
		-0.706085	1	1	0	0	0	1	1	0	0	1	0	0	0	1	1	1	1	0	0		0	1	1	1	1	0	0	1	1	1	0	1	0	0	0	0	1	0	0
		-0.697335	0	0	0	0	1	0	0	0	1	0	0	0	0	0	0	0	0	1	0		1	1	1	0	1	0	1	0	0	0	0	1	1	1	0	1	0	0	0
		-0.688474	0	0	0	1	0	0	0	0	1	0	0	0	0	0	0	1	0	1	1		0	0	0	0	0	0	1	0	1	0	1	0	1	0	0	0	0	1	1
		-0.679506	1	1	0	1	1	1	0	0	1	0	1	1	1	0	1	0	0	0	1		0	0	0	0	0	1	0	1	1	1	1	0	1	0	1	1	1	0	0
		-0.670429	0	0	1	1	1	0	1	1	0	0	1	1	1	1	0	1	1	0	0		0	0	0	1	1	1	0	1	1	1	0	0	0	0	1	0	1	1	1
		-0.661247	0	1	0	0	0	1	1	1	0	0	1	0	1	1	0	0	1	1	0		1	0	0	1	0	0	0	0	0	0	0	0	0	0	0	1	1	1	1
		-0.651961	0	1	1	1	0	1	0	1	0	1	1	0	0	0	1	0	0	0	0		1	1	1	0	0	0	0	0	0	0	0	1	1	1	0	1	0	0	0
		-0.642571	0	0	0	0	0	0	0	1	1	0	0	0	1	1	0	0	0	1	1		0	0	0	1	0	1	1	0	0	0	1	1	1	1	0	0	0	0	0
		-0.63308	0	0	0	0	0	0	1	0	0	1	0	1	0	0	1	0	0	0	1		0	1	1	0	0	1	0	0	0	0	1	0	0	1	1	0	0	0	0
		-0.623489	1	0	1	0	1	0	1	1	0	1	1	1	0	0	1	1	1	0	0		0	1	1	0	1	0	1	0	1	1	0	0	0	0	0	0	1	1	1
		-0.6138	1	0	1	0	1	1	0	0	0	1	0	0	0	0	0	1	1	0	0		1	0	0	1	1	0	1	1	0	1	1	0	1	0	1	1	0	1	0
		-0.604014	1	1	0	1	1	1	0	0	1	0	0	1	0	0	0	1	1	1	1		1	1	0	0	1	0	1	0	1	0	0	1	1	0	0	1	1	0	1
		-0.594132	0	1	1	1	0	0	0	0	1	1	0	0	0	1	0	1	0	1	1		0	0	1	1	0	0	0	1	1	1	0	1	0	1	1	1	0	1	1
		-0.584156	1	1	0	1	1	0	0	0	0	0	1	0	1	1	0	0	0	0	0		1	0	0	1	1	0	0	1	0	1	1	0	0	1	1	0	0	0	0
		-0.574089	0	0	1	0	1	1	1	0	0	0	1	1	1	1	1	0	1	0	0		1	1	0	0	0	1	0	1	0	0	0	0	0	0	1	0	0	0	0
		-0.56393	0	0	0	0	0	0	1	1	1	0	0	0	0	1	0	0	0	1	0		0	1	0	0	0	0	1	1	0	1	1	0	0	0	0	0	0	0	0
		-0.553683	0	0	1	0	0	0	1	1	0	0	1	0	0	0	1	0	1	0	1		0	0	1	0	0	1	1	0	1	0	1	1	1	1	0	0	1	0	0
		-0.543348	0	1	0	1	0	0	0	1	1	1	0	1	0	1	0	1	0	1	1		0	0	0	1	0	1	0	0	0	1	0	0	0	1	0	1	1	1	1
		-0.532927	1	1	0	1	0	0	0	0	0	1	0	0	1	0	1	0	0	0	1		0	1	0	0	1	1	1	0	1	0	0	1	0	0	1	0	1	1	1
		-0.522422	1	0	1	0	1	1	0	1	0	1	1	1	1	0	1	1	1	1	0		0	1	1	0	1	0	1	1	0	0	0	1	1	0	1	1	1	0	0
		-0.511835	1	0	0	1	1	1	1	1	0	1	1	0	1	0	0	1	1	1	0		1	0	0	0	1	0	0	0	1	0	1	1	1	0	0	0	0	1	1
		-0.501167	0	0	1	0	0	1	0	1	1	0	1	0	0	0	1	1	1	0	0		0	1	1	1	0	0	0	1	1	1	1	0	1	1	1	0	0	0	1
		-0.490419	1	1	0	0	1	1	0	0	1	0	0	1	1	0	0	0	0	0	1		1	1	1	1	0	1	0	1	1	0	1	0	0	1	0	1	1	1	1
		-0.479595	0	1	1	0	0	0	0	0	1	0	1	1	0	1	0	0	0	0	1		1	0	1	0	1	1	0	0	0	0	0	0	0	0	0	0	1	0	0
		-0.468694	0	0	1	1	0	0	0	0	0	1	0	1	0	1	1	0	0	1	0		1	0	0	0	1	0	1	0	0	1	1	0	0	0	1	1	0	1	0
		-0.45772	1	1	0	0	1	0	0	0	0	1	0	0	0	0	0	1	0	1	0		0	0	1	0	1	0	1	0	1	0	0	1	0	1	0	1	0	0	0
		-0.446673	0	0	0	1	0	1	1	1	1	0	0	1	0	1	1	1	0	1	1		0	0	0	1	0	1	0	0	1	1	0	0	0	1	1	0	0	1	0
		-0.435556	0	1	0	1	1	0	0	1	1	0	0	0	1	0	0	0	0	0	0		0	1	0	1	0	1	0	1	0	1	0	1	1	0	0	0	0	1	1
		-0.424369	0	0	1	1	0	1	1	0	0	1	0	0	1	0	0	0	1	0	0		1	1	1	0	0	0	1	1	0	1	1	1	1	1	1	0	0	1	0
		-0.413116	1	1	1	0	0	0	1	1	1	0	0	0	1	1	0	0	1	0	0		1	0	0	0	1	0	1	0	0	0	1	1	1	0	0	1	1	0	1
		-0.401798	1	0	0	0	0	1	1	0	0	1	1	0	0	1	0	1	1	0	1		0	1	1	1	0	0	0	1	1	1	0	1	1	1	1	1	1	0	0
		-0.390416	1	0	1	0	1	1	1	0	0	0	1	1	0	0	1	0	1	1	1		1	0	0	1	1	1	1	1	1	0	1	0	0	1	0	1	1	0	1
		-0.378973	0	0	0	1	0	0	1	1	0	1	0	1	1	0	1	1	0	1	0		0	1	0	1	0	1	0	0	0	0	0	0	0	0	0	0	1	1	0
		-0.367469	1	1	0	0	1	0	0	0	1	0	1	1	1	1	1	0	0	0	1		1	1	1	0	1	0	0	0	0	1	0	0	1	0	1	0	0	1	1
		-0.355908	1	0	0	1	1	0	1	1	0	0	1	1	0	1	1	1	1	1	0		0	0	0	0	0	1	0	0	0	0	1	1	1	0	0	1	0	0	0
		-0.344291	0	1	0	1	1	0	1	1	1	0	0	0	0	0	0	1	0	0	0		1	1	1	0	0	1	0	1	1	1	1	0	0	0	1	0	1	0	1
		-0.332619	0	1	1	0	0	1	0	0	1	0	1	0	0	0	1	1	0	1	1		1	0	1	1	0	0	1	1	1	1	0	1	0	1	1	0	1	0	1
		-0.320894	0	0	1	0	1	1	0	0	1	1	0	0	0	1	0	0	0	1	1		0	0	0	1	1	0	1	1	0	0	0	1	0	0	0	0	0	1	0
		-0.309119	1	1	0	0	1	0	0	1	0	1	0	1	1	1	0	0	0	0	0		0	0	1	0	1	0	1	0	1	0	0	0	1	1	1	0	0	1	1
		-0.297295	0	0	0	0	0	1	0	1	0	1	1	1	1	1	0	0	1	1	1		0	0	0	1	0	1	0	0	1	0	1	1	1	1	0	1	0	0	0
		-0.285425	0	1	0	1	0	0	1	0	0	1	0	0	1	0	0	1	1	0	0		0	1	0	0	1	1	1	0	0	0	1	0	0	0	1	1	1	1	0
		-0.273509	0	0	1	1	0	1	1	0	1	0	0	0	0	0	1	1	1	0	1		1	1	0	0	1	1	0	1	1	1	0	1	1	0	1	0	1	0	0
		-0.261549	1	0	1	1	1	1	0	0	0	0	1	1	1	1	1	1	0	0	0		1	0	1	1	1	0	0	1	0	1	0	0	0	1	0	1	0	1	1
		-0.249549	1	1	1	0	1	0	0	0	1	0	1	0	1	1	1	0	0	0	1		1	1	0	0	0	1	1	0	1	0	1	1	0	1	0	1	0	0	1
		-0.237509	1	0	0	0	0	1	1	1	0	1	0	0	0	1	0	0	1	0	0		0	0	1	1	0	0	0	1	0	1	1	0	0	0	1	1	1	1	1
		-0.225432	0	1	0	1	0	0	0	1	1	1	0	1	0	0	1	0	1	1	1		1	0	1	0	0	0	1	1	1	0	0	0	0	0	1	0	1	0	0
		-0.213319	0	0	1	1	0	0	1	1	1	0	0	1	0	0	0	1	0	1	0		1	1	0	0	0	0	1	1	0	1	1	0	1	0	0	1	0	1	0
		-0.201172	1	1	0	0	1	1	0	1	1	1	1	0	1	0	1	1	1	1	0		0	0	0	0	1	0	1	0	1	0	0	1	1	1	1	1	0	0	0
		-0.188994	1	0	1	0	1	0	1	0	0	1	1	0	1	0	1	0	1	0	1		0	1	1	1	0	0	0	0	1	1	0	1	1	1	0	0	1	1	1
		-0.176786	1	1	0	1	1	1	0	0	0	0	1	0	0	1	0	1	0	1	1		0	1	1	1	1	1	0	0	1	0	1	0	0	0	1	0	1	0	1
		-0.16455	0	0	0	1	0	1	1	1	0	0	0	0	0	0	0	1	0	1	0		1	0	1	0	1	1	1	1	0	1	0	1	1	0	0	1	0	0	1
		-0.152288	0	0	1	0	0	0	1	0	0	0	0	1	1	1	1	0	0	0	1		1	0	0	1	0	0	0	1	0	1	1	0	0	1	0	0	0	1	0
		-0.140001	1	0	1	1	1	0	0	0	1	0	0	1	1	0	1	1	0	1	1		1	0	0	0	0	1	0	0	0	0	0	0	1	1	0	0	1	0	1
		-0.127693	0	0	0	0	0	0	0	0	0	1	1	1	0	1	1	0	1	0	0		0	1	1	1	0	1	0	1	1	1	1	1	1	1	1	1	1	1	0
		-0.115365	0	1	1	1	0	0	0	0	1	1	1	1	0	0	0	0	1	0	0		1	1	0	1	1	1	1	0	1	0	1	0	0	1	1	0	1	1	0
		-0.103018	0	1	0	0	1	1	1	1	1	0	1	0	0	1	0	1	1	1	0		0	1	0	0	1	1	1	0	0	0	0	1	0	0	0	1	0	1	0
		-0.0906551	1	1	0	0	0	1	1	1	1	1	0	1	1	0	0	1	0	1	0		1	0	0	0	1	0	1	1	0	0	0	1	1	1	0	0	1	0	1
		-0.0782779	1	1	0	1	1	1	0	0	0	0	1	0	1	1	1	0	1	0	1		0	1	1	1	1	0	0	0	1	0	1	0	1	0	0	1	0	0	1
		-0.0658883	0	0	1	0	1	0	0	1	0	1	0	1	0	1	0	0	0	0	1		0	0	1	0	0	1	0	1	0	1	1	0	0	1	1	1	0	0	1
		-0.0534883	1	1	1	1	1	1	1	1	0	1	1	0	0	0	0	0	1	1	1		0	0	0	0	1	1	0	1	1	1	0	1	1	0	1	0	1	1	0
		-0.0410799	0	1	0	1	0	0	1	0	1	0	1	1	1	0	1	1	0	0	0		1	1	0	0	0	0	1	0	0	1	0	1	0	0	1	1	0	1	0
		-0.0286649	0	0	1	0	0	1	0	0	1	0	0	0	0	1	1	1	0	1	1		1	0	0	1	1	0	1	0	1	0	1	1	0	1	0	0	1	0	1
		-0.0162455	1	1	1	1	0	0	0	0	1	1	0	0	1	1	1	1	1	0	0		0	1	1	1	0	1	0	1	1	1	1	0	1	1	0	1	1	1	1
		-0.00382342	1	0	1	0	0	1	1	1	0	1	0	0	1	0	0	0	0	1	1		1	1	1	1	0	1	1	0	0	0	0	0	0	0	1	0	0	1	1
		0.00859921	1	0	0	1	1	1	1	1	0	0	1	1	1	1	1	1	1	1	0		0	0	1	1	1	0	1	1	0	1	0	0	1	0	1	1	0	0	0
		0.0210205	0	0	0	0	1	0	0	1	0	0	1	0	0	0	0	0	1	1	0		1	1	0	0	0	0	1	1	0	0	1	1	1	0	0	0	0	1	0
		0.0334384	1	1	0	1	0	0	0	1	1	1	0	1	0	1	1	1	0	0	1		0	0	1	0	0	0	1	0	1	0	1	1	1	1	0	0	1	0	1
		0.0458511	0	1	1	0	1	0	0	0	1	0	1	1	1	1	0	0	1	0	1		0	0	0	1	1	1	0	1	1	1	1	0	0	1	1	1	1	1	1
		0.0582565	0	0	1	0	1	1	1	1	0	1	0	1	1	0	1	0	0	0	0		1	0	1	1	1	1	0	1	1	1	0	1	1	0	0	0	1	0	1
		0.0706528	0	1	1	1	0	1	1	0	0	1	0	1	0	1	0	0	1	0	0		1	1	0	1	1	0	0	1	0	0	0	0	0	1	1	1	0	0	0
		0.0830379	0	1	0	1	1	1	1	1	1	0	1	0	0	0	1	1	1	0	0		1	0	1	0	0	0	1	0	1	0	0	1	0	0	0	1	1	0	1
		0.0954098	1	1	1	0	0	1	0	0	1	0	0	1	0	0	0	1	0	1	1		0	1	1	1	0	1	0	0	0	1	1	1	1	1	1	1	0	1	1
		0.107767	1	0	0	0	1	0	0	0	0	1	1	0	1	0	1	1	1	0	1		0	1	0	0	0	1	1	0	0	1	0	0	0	1	1	0	1	1	0
		0.120107	1	0	1	1	1	0	1	1	0	0	1	0	1	1	0	0	0	1	0		1	0	0	0	1	1	1	1	1	0	0	0	1	0	1	0	0	1	0
		0.132428	0	1	0	1	0	1	0	1	0	1	0	0	0	1	0	0	1	1	1		1	0	0	0	1	0	1	1	0	1	1	1	1	1	0	1	1	0	0
		0.144728	0	0	1	0	0	1	0	1	1	0	0	1	0	0	1	1	0	1	0		0	1	1	0	0	1	0	0	1	0	1	1	0	0	0	1	1	0	1
		0.157005	1	0	0	0	0	0	1	0	1	1	0	0	1	1	0	1	0	1	1		0	1	1	1	1	0	0	0	1	1	1	0	0	0	1	1	1	0	1
		0.169257	1	0	0	1	1	0	0	0	1	0	1	1	0	1	0	0	1	0	1		1	1	1	1	0	0	1	1	1	0	1	1	1	0	1	0	0	1	1
		0.181483	1	0	1	0	1	1	1	1	0	1	1	1	1	0	1	0	1	1	0		0	1	0	1	1	1	0	1	0	1	0	1	1	1	0	1	0	1	0
		0.19368	0	1	0	1	1	1	1	1	1	0	1	0	1	1	0	1	1	0	0		1	0	0	0	1	0	1	0	0	1	0	0	1	1	0	0	0	0	0
		0.205846	0	1	1	1	0	0	1	0	0	0	1	0	0	0	1	1	0	1	0		0	0	1	1	0	1	0	1	0	0	0	0	0	1	0	0	1	1	0
		0.21798	1	1	1	0	0	0	1	1	0	1	0	0	1	1	1	1	0	1	1		1	0	0	1	1	0	0	0	1	1	1	0	0	1	1	0	1	1	1
		0.230079	1	0	0	1	1	0	0	0	0	1	0	1	1	1	1	0	1	0	1		0	1	1	0	0	1	1	0	1	1	0	1	1	0	1	1	1	0	0
		0.242142	1	0	1	0	1	1	0	1	0	0	1	1	0	0	1	1	1	0	1		1	0	0	0	0	0	1	1	0	1	1	1	1	1	1	1	0	1	1
		0.254167	0	1	0	1	0	1	1	0	1	1	1	1	0	0	0	0	1	0	0		0	0	1	0	1	1	1	0	1	0	1	1	0	0	0	1	0	0	1
		0.266152	0	1	1	1	0	1	1	0	1	0	0	0	0	1	1	1	0	1	1		1	1	1	1	0	1	0	1	1	0	1	0	0	0	0	0	0	1	1
		0.278095	1	1	0	0	0	0	0	1	1	1	0	1	1	0	0	1	0	1	1		1	1	0	1	1	0	0	1	1	0	0	0	0	0	1	0	0	1	0
		0.289994	0	0	1	0	1	1	0	0	1	1	1	1	1	0	1	0	0	0	0		1	1	1	1	1	0	0	1	0	1	1	0	1	1	1	1	0	1	0
		0.301847	1	1	1	1	1	0	0	1	0	0	1	0	1	0	1	0	0	1	1		0	0	0	0	1	0	0	0	0	0	0	0	1	1	0	1	1	0	0
		0.313652	1	0	0	0	0	0	1	1	1	1	0	0	0	1	0	0	1	0	0		1	1	1	0	0	1	1	0	0	1	1	1	1	1	1	0	1	1	1
		0.325408	0	1	0	1	0	0	1	0	1	0	0	0	0	0	0	1	1	1	1		0	0	0	1	0	1	0	0	1	1	1	0	0	1	0	0	1	0	1
		0.337112	1	1	1	0	1	1	0	0	0	1	1	1	1	1	1	1	0	1	0		0	1	1	1	1	1	1	1	1	1	0	1	1	0	1	1	0	0	0
		0.348763	0	0	1	0	1	0	1	0	1	1	1	1	1	1	0	0	1	0	0		1	0	0	0	1	0	1	1	0	0	1	1	1	1	0	1	1	0	1
		0.36036	1	0	0	0	1	1	1	1	0	1	0	1	1	1	1	1	1	1	1		1	1	1	1	0	1	1	0	1	0	0	1	1	0	0	1	1	1	1
		0.371899	1	0	1	1	1	1	1	1	1	1	0	0	0	1	0	1	0	1	0		0	1	1	1	1	0	0	1	1	1	1	0	0	0	1	0	0	1	1
		0.383379	0	1	0	1	0	1	0	1	1	0	1	0	0	0	1	1	0	0	1		1	0	0	1	0	1	1	1	0	1	0	1	0	1	1	0	0	0	0
		0.394799	0	1	0	1	0	1	0	1	0	0	0	1	0	0	0	1	1	0	1		1	1	1	0	1	1	1	1	0	0	1	1	0	0	1	1	0	1	0
		0.406157	1	1	1	1	1	0	0	0	1	0	1	1	1	1	1	0	1	0	0		1	0	0	1	1	0	1	0	0	0	0	1	1	1	0	1	1	0	0
		0.41745	1	0	1	0	0	1	1	0	0	1	1	0	1	0	1	0	0	0	1		0	1	1	0	0	1	0	0	1	1	1	1	1	1	1	0	1	1	1
		0.428678	0	1	0	0	1	0	1	1	1	1	1	1	0	1	0	1	0	1	0		0	1	1	1	0	0	0	0	1	1	1	0	0	1	1	0	1	1	1
		0.439838	0	0	1	1	0	0	1	1	1	0	0	0	1	0	1	0	1	1	0		0	0	0	1	1	0	0	1	1	1	0	0	1	0	1	1	0	0	0
		0.450928	1	0	1	0	1	1	0	0	0	1	1	0	1	1	1	0	0	1	1		1	0	0	0	1	1	1	1	0	0	1	1	0	0	0	1	1	1	1
		0.461947	1	0	1	0	1	0	0	0	0	1	0	1	0	1	0	0	1	0	1		1	1	1	0	0	0	1	0	1	0	0	1	1	1	0	1	1	0	1
		0.472894	0	1	0	1	0	1	1	0	1	0	0	1	0	1	1	1	1	1	1		0	1	1	0	0	1	0	1	1	0	0	0	1	1	0	1	1	0	1
		0.483765	0	1	0	1	0	0	1	1	1	0	1	0	1	0	0	1	1	0	0		1	0	1	1	1	1	0	1	1	1	1	1	0	0	1	0	0	1	0
		0.49456	0	1	0	1	0	1	0	1	0	0	1	1	0	0	1	1	0	1	1		1	1	0	1	1	1	1	1	0	1	0	0	1	0	1	0	0	1	0
		0.505278	1	1	1	1	1	0	0	1	0	0	0	1	1	1	1	1	0	0	1		1	0	1	0	1	0	1	0	0	1	1	1	1	1	0	1	1	0	0
		0.515915	1	0	1	0	1	1	0	0	1	1	1	1	1	1	0	0	1	1	0		0	1	0	1	0	1	1	0	1	0	1	1	1	1	1	0	1	0	1
		0.526471	1	1	0	0	0	0	1	1	0	1	1	0	0	0	0	0	1	1	0		1	1	1	1	0	1	0	0	1	1	1	0	0	1	1	0	1	1	1
		0.536943	1	0	1	1	1	1	1	0	1	1	1	1	0	0	0	0	1	0	0		0	0	0	1	1	0	1	1	1	1	0	0	0	0	1	1	0	1	0
		0.547331	0	0	0	1	0	1	1	0	1	0	0	0	0	1	0	1	0	1	0		0	1	0	0	1	0	1	1	0	1	0	1	1	1	0	1	1	0	1
		0.557633	1	0	1	0	1	1	0	1	1	1	0	1	1	1	1	1	0	0	1		0	0	1	0	0	0	0	0	0	0	0	1	0	0	0	1	0	0	1
		0.567846	0	0	0	0	1	0	1	0	0	0	0	1	1	1	1	0	1	0	1		1	1	1	1	0	1	0	1	1	0	1	0	0	1	1	0	0	1	0
		0.57797	1	1	1	1	1	0	1	1	1	1	1	0	1	0	1	1	1	0	1		0	1	1	1	1	1	0	1	1	1	1	1	0	1	1	1	1	1	0
[truncated: 3,012 more rows]

## Sheet: Figure2_supplement_Fig1_A_16Hz
		chirp phase 1
		Stimulus	Neuron 1																				Neuron 2
			Trial 1	Trial 2	Trial 3	Trial 4	Trial 5	Trial 6	Trial 7	Trial 8	Trial 9	Trial 10	Trial 11	Trial 12	Trial 13	Trial 14	Trial 15	Trial 16	Trial 17	Trial 18	Trial 19		Trial 1	Trial 2	Trial 3	Trial 4	Trial 5	Trial 6	Trial 7	Trial 8	Trial 9	Trial 10	Trial 11	Trial 12	Trial 13	Trial 14	Trial 15	Trial 16	Trial 17	Trial 18	Trial 19
		-0.119101	1	0	1	0	0	0	1	0	1	1	0	0	1	0	1	0	0	1	0		1	1	1	1	1	1	0	0	1	1	1	0	1	0	1	1	1	1	1
		-0.019897	0	1	0	1	1	0	0	1	0	1	1	0	0	0	1	1	0	0	0		0	1	1	1	1	0	1	1	1	1	1	1	0	1	1	1	1	1	1
		0.0795077	0	0	1	0	0	1	0	0	1	0	0	1	1	1	0	1	1	1	1		1	1	1	1	1	1	1	1	1	1	1	1	1	1	1	1	1	0	1
		0.178109	1	1	0	0	0	1	1	0	0	0	1	0	0	0	1	0	1	0	0		1	1	1	1	0	1	0	1	1	1	1	1	1	1	1	0	0	1	0
		0.274913	0	0	1	1	1	0	1	0	1	0	0	0	0	0	0	0	1	0	1		0	0	0	0	0	1	0	0	0	0	0	0	0	0	0	1	1	1	0
		0.36894	0	1	0	0	0	1	0	1	1	1	1	0	1	0	0	1	0	1	0		1	1	1	1	1	0	1	1	1	1	1	1	1	1	1	1	1	1	1
		0.459242	1	1	0	0	0	0	0	0	0	1	0	1	0	1	0	0	0	1	0		1	1	1	1	1	1	1	1	1	1	1	0	1	1	1	1	0	1	1
		0.544906	1	0	0	0	0	0	0	1	1	0	1	1	0	0	1	0	1	0	1		1	1	1	1	1	1	1	1	1	0	0	1	1	1	1	1	1	0	1
		0.625068	0	0	1	1	1	0	1	1	0	0	0	0	1	0	0	0	0	0	1		1	1	0	0	1	1	1	1	1	1	1	1	1	1	0	0	0	1	0
		0.698918	1	0	1	0	0	0	0	0	1	1	1	0	0	0	1	1	0	1	0		0	0	0	1	0	0	0	0	0	0	0	0	0	0	1	1	1	1	1
		0.76571	0	1	0	1	0	1	0	1	0	0	0	1	1	1	0	1	0	0	0		1	1	1	0	1	1	1	1	1	1	1	1	1	1	1	1	1	0	1
		0.82477	0	0	1	0	1	1	1	0	0	0	0	1	0	0	0	0	0	1	1		1	1	1	1	1	1	1	1	1	0	1	1	1	1	1	1	1	1	1
		0.875502	0	0	0	0	0	0	0	0	0	1	1	0	0	1	1	0	1	0	0		1	0	1	1	0	0	0	1	1	1	1	0	1	1	1	0	1	0	0
		0.917393	1	0	0	1	1	0	1	0	0	0	0	0	0	0	0	1	1	0	0		0	0	0	0	1	1	1	0	1	1	1	1	0	0	0	0	0	1	1
		0.95002	1	1	0	1	0	1	0	0	1	1	0	0	1	1	0	0	0	0	0		1	1	1	1	0	0	0	0	0	0	0	0	0	0	0	0	1	1	1
		0.973053	0	0	1	1	0	1	0	1	0	0	0	0	1	0	1	1	0	0	0		1	0	1	1	1	1	1	1	1	1	1	1	1	1	1	0	1	1	1
		0.986261	0	0	1	0	1	0	1	0	0	0	0	1	0	0	0	1	1	1	1		0	0	1	0	1	1	1	1	1	1	0	1	1	1	0	1	0	0	0
		0.98951	0	1	0	0	0	0	1	0	1	0	1	0	0	1	1	0	0	0	0		0	1	0	1	0	1	0	1	0	0	1	0	1	0	1	0	1	0	0
		0.982767	0	0	0	0	0	1	0	1	0	0	0	0	0	0	0	0	0	1	1		0	0	1	0	1	0	0	0	0	1	0	0	0	0	0	1	0	1	0
		0.9661	0	0	1	0	0	0	0	0	1	0	1	0	0	0	0	0	0	0	0		1	1	0	0	0	0	1	0	0	0	1	1	0	1	1	1	0	1	1
		0.939677	0	0	0	1	1	0	0	0	0	0	0	0	0	0	0	0	0	0	0		1	1	0	1	0	1	1	0	0	1	0	1	0	0	0	1	0	1	0
		0.903765	1	1	0	1	0	0	0	0	1	1	1	1	1	1	1	0	0	0	0		0	1	0	0	0	0	0	0	1	0	0	0	0	1	0	0	0	0	0
		0.858727	1	0	0	0	0	0	0	0	0	0	0	0	1	0	0	0	1	0	1		0	0	1	0	0	1	0	1	0	0	0	0	1	0	0	1	0	0	1
		0.805018	0	0	0	0	0	1	1	1	0	0	0	0	0	0	0	1	0	1	1		0	0	0	1	0	0	0	0	0	1	0	0	0	0	1	0	1	0	0
		0.743179	0	0	0	0	0	0	0	0	0	1	0	1	0	0	0	0	0	0	0		0	0	1	1	0	0	0	1	1	0	1	1	1	0	0	0	1	0	0
		0.673836	0	0	0	1	0	0	0	1	1	1	0	0	0	0	0	0	1	1	0		0	0	0	0	1	0	1	1	0	1	1	1	0	0	1	0	0	0	0
		0.597689	0	0	0	0	1	0	0	0	0	0	0	0	0	0	0	0	0	0	0		1	1	0	0	0	0	1	0	0	0	0	0	0	1	0	0	0	0	1
		0.515506	1	0	0	0	0	0	1	0	0	0	1	0	0	0	0	1	1	0	1		0	0	0	0	0	0	0	0	0	0	0	0	0	0	0	1	0	0	0
		0.428118	0	0	0	0	1	0	0	1	0	0	0	0	0	0	0	0	0	0	0		1	0	0	0	1	1	0	0	1	0	0	0	0	1	0	0	1	0	1
		0.336406	0	0	1	0	0	0	0	0	0	0	0	0	1	1	0	0	0	0	0		0	0	0	0	0	0	0	0	0	0	0	0	0	0	0	0	1	0	0
		0.241298	1	1	0	0	1	1	1	0	0	0	0	1	0	0	0	0	0	0	0		0	0	0	0	0	0	0	0	0	0	0	0	0	0	1	0	0	0	0
		0.143753	0	0	1	0	0	0	0	0	0	0	1	0	0	0	0	0	0	0	0		0	0	0	0	0	0	0	0	0	0	0	0	0	0	0	0	0	1	0
		0.044756	0	0	0	0	0	0	0	0	0	0	0	0	0	1	1	1	0	0	0		0	1	0	0	0	1	0	0	0	0	0	0	0	0	0	0	0	1	0
		-0.0546926	0	0	0	0	0	0	0	0	0	0	0	0	0	0	1	0	0	0	0		1	0	1	0	1	0	0	0	0	0	0	0	1	0	1	0	0	0	0
		-0.153589	0	0	0	0	0	0	0	0	0	0	0	0	0	0	0	0	0	0	0		0	0	0	1	0	1	0	1	0	0	0	0	1	0	0	0	0	1	0
		-0.250934	0	0	0	0	0	1	0	0	1	0	0	1	0	0	1	0	0	0	0		0	0	1	1	0	0	1	1	0	1	0	1	1	0	0	0	0	0	0
		-0.345746	0	0	0	0	0	0	0	0	0	1	0	0	1	0	0	0	0	0	0		0	0	0	0	0	0	0	0	0	0	0	1	0	0	0	1	0	0	0
		-0.437066	0	0	0	0	0	0	0	0	0	0	0	0	0	1	0	0	0	0	0		0	1	0	0	0	0	0	0	1	1	1	0	0	1	0	1	0	0	0
		-0.523973	0	0	0	0	0	0	0	1	0	0	0	0	0	0	0	0	0	0	0		0	0	0	0	0	0	1	0	0	0	1	0	0	1	0	0	0	0	0
		-0.605588	0	0	0	0	0	0	0	0	0	0	0	0	0	0	0	0	1	0	0		0	0	0	0	0	0	0	0	0	0	1	0	0	0	0	0	0	0	0
		-0.681089	0	0	0	0	0	0	0	0	0	0	0	0	0	0	0	0	1	0	0		0	0	0	0	0	0	0	0	0	0	0	0	0	0	0	0	1	1	1
		-0.749712	0	1	0	1	0	0	0	0	0	0	0	0	0	0	0	0	0	1	0		0	0	0	0	0	0	0	0	0	0	0	0	0	0	0	0	0	1	1
		-0.810764	0	0	0	0	0	0	0	0	0	0	1	0	0	0	0	1	0	0	0		0	0	0	1	1	0	0	0	1	0	0	0	0	0	0	1	0	0	0
		-0.863629	0	0	0	0	0	0	0	0	0	1	0	0	0	0	0	0	0	0	1		1	1	1	1	1	0	0	1	0	0	0	0	1	0	0	0	0	0	0
		-0.907773	0	0	1	1	0	0	0	1	0	0	0	0	1	0	0	0	0	0	0		1	1	1	0	0	0	1	1	1	0	1	1	0	0	1	0	1	0	0
		-0.942751	0	1	0	0	0	0	0	0	0	0	0	0	0	0	0	0	0	0	0		1	0	1	0	0	1	0	1	1	1	0	1	1	0	1	0	0	0	0
		-0.968209	0	0	0	0	0	0	0	0	0	0	0	0	0	0	1	0	0	0	1		0	0	0	0	0	1	0	0	0	0	0	1	0	0	0	0	1	0	1
		-0.983889	1	0	1	0	0	0	1	0	0	0	0	0	1	0	1	0	0	0	0		0	0	1	1	0	0	1	0	0	1	0	0	0	1	1	0	1	0	1
		-0.989635	0	0	0	0	1	0	0	1	1	1	0	0	0	0	0	0	0	0	0		1	0	0	1	1	1	0	0	0	1	0	0	1	1	1	1	0	1	0
		-0.985387	0	1	0	0	0	1	1	0	1	0	1	1	1	0	0	0	0	1	0		0	1	0	0	1	0	0	0	0	0	1	0	0	1	0	1	0	0	0
		-0.971189	1	0	0	0	0	0	0	0	0	0	0	0	0	0	0	0	0	0	0		0	1	0	0	1	0	1	0	0	1	0	0	0	1	0	1	0	1	0
		-0.947186	0	1	0	1	0	1	0	0	0	0	0	0	0	1	0	0	0	1	0		0	0	0	0	0	0	1	1	0	0	0	1	0	0	0	0	0	0	1
		-0.913627	1	0	0	0	1	0	0	0	1	1	1	1	0	1	0	1	0	0	1		0	1	0	0	1	0	0	0	1	0	0	0	0	0	0	1	1	1	1
		-0.870857	0	0	0	0	1	1	0	0	0	0	1	1	0	0	1	1	1	0	0		0	0	1	0	0	1	0	1	1	1	1	1	0	0	1	0	1	1	1
		-0.819312	0	0	0	1	0	0	0	0	1	0	0	0	0	1	0	1	1	0	1		1	1	1	1	1	1	1	1	1	1	1	1	1	1	1	0	1	0	1
		-0.759493	1	0	1	0	0	0	1	0	0	0	0	0	0	0	0	0	1	1	0		1	0	1	1	1	1	1	1	1	1	1	1	1	1	0	0	0	1	0
		-0.691868	0	0	0	0	0	0	0	1	0	0	1	0	0	1	0	1	0	1	0		0	1	0	0	0	1	1	0	1	0	0	0	1	0	0	1	1	1	1
		-0.616634	0	0	1	0	0	0	0	1	0	1	0	0	0	1	1	0	0	1	1		1	0	1	1	1	0	0	0	0	1	1	0	0	1	1	1	0	0	0
		-0.533212	0	0	0	0	1	1	1	0	0	0	1	1	1	0	0	1	0	0	0		1	0	1	1	1	1	1	1	1	1	1	1	1	1	1	1	1	0	0
		-0.439328	0	1	0	1	1	1	1	1	1	0	0	1	1	0	1	0	1	0	1		1	1	1	1	0	1	1	1	1	0	1	1	1	1	1	1	1	1	1
		-0.329849	1	1	1	1	1	0	0	0	0	1	0	0	0	0	0	0	1	0	1		1	1	1	1	1	1	1	1	1	1	1	1	1	1	1	1	1	0	0
		-0.195858	1	0	1	1	0	1	1	0	0	0	0	1	0	1	0	1	0	1	0		0	0	0	0	0	1	1	1	1	1	0	1	0	0	0	0	0	1	1
		-0.0251576	0	1	0	1	0	0	0	1	0	1	1	0	1	0	1	1	0	0	0		1	1	1	1	1	0	0	0	0	0	1	0	1	1	1	1	1	1	1
		0.193372	0	0	1	0	1	1	1	0	1	0	1	1	1	1	0	0	1	0	1		1	1	1	1	1	1	1	1	1	1	1	1	1	1	1	1	1	1	1
		0.45793	1	0	0	1	0	0	1	0	1	0	0	1	0	0	1	0	1	1	1		1	1	1	1	1	1	1	1	1	1	1	1	1	1	1	1	1	1	1
		0.734371	0	1	0	0	0	1	0	1	0	1	0	0	1	0	1	0	0	1	1		1	1	0	1	1	1	1	1	0	1	0	1	1	0	0	0	0	0	0
		0.9439	0	1	0	0	1	1	0	1	0	0	1	1	1	1	0	1	1	0	0		0	0	0	0	0	0	0	0	1	0	1	0	0	1	1	1	1	1	1
		0.988202	1	0	1	0	1	0	0	0	0	0	0	0	0	0	0	0	0	0	0		1	1	0	0	0	0	0	0	0	0	0	0	0	0	0	0	0	0	1
		0.817912	0	0	0	0	0	0	1	0	0	0	0	0	0	0	1	0	0	0	0		0	0	0	0	0	0	0	0	0	0	0	0	0	0	0	0	0	0	0
		0.48233	0	0	0	0	0	0	0	0	0	0	0	0	0	0	0	0	0	0	0		0	0	0	0	0	0	0	0	0	0	0	0	0	0	0	0	0	0	0
		0.09551	0	1	1	0	0	0	0	0	0	0	0	0	0	0	0	0	0	0	0		0	0	0	0	0	0	0	0	0	0	0	0	0	0	0	0	0	0	0
		-0.244428	0	0	0	0	0	0	0	0	0	0	0	0	0	0	0	0	0	0	0		0	0	0	0	0	0	0	0	0	0	0	0	0	0	0	0	0	0	0
		-0.497664	0	0	0	0	0	0	0	0	0	0	0	0	0	0	0	0	0	0	0		0	0	0	0	0	0	0	0	0	0	0	0	0	0	0	0	0	0	0
		-0.669903	0	0	0	0	0	0	0	0	0	1	0	0	0	0	0	0	0	0	0		0	0	0	0	0	0	0	0	0	0	0	0	0	0	0	0	0	0	0
		-0.783407	0	0	0	0	0	0	0	0	0	0	0	0	0	0	0	0	0	0	0		0	0	0	0	0	0	0	0	0	0	0	0	0	0	0	0	0	0	0
		-0.859056	0	0	0	0	0	0	0	0	0	0	0	0	0	0	0	0	0	0	0		0	0	0	0	0	0	0	0	0	0	0	0	0	0	0	0	0	0	0
		-0.911026	0	0	0	0	0	0	0	0	0	0	1	0	0	0	0	0	0	0	0		0	0	0	0	0	0	0	0	0	0	0	0	0	0	0	0	0	1	0
		-0.947322	0	0	0	0	0	0	0	0	0	0	0	0	0	0	0	0	0	0	0		0	0	0	0	0	0	0	0	1	0	0	0	0	0	0	0	0	1	0
		-0.971752	0	0	0	1	0	1	1	0	1	0	0	0	0	0	0	0	0	1	0		0	0	1	1	1	1	0	0	1	1	1	0	1	0	1	1	0	0	0
		-0.985765	0	0	0	0	0	0	0	0	0	0	0	0	0	0	0	0	0	0	0		0	1	1	0	0	1	0	0	0	1	0	1	1	1	1	0	0	0	0
		-0.989761	0	1	0	0	0	0	0	1	0	0	0	0	0	0	0	1	1	0	0		1	0	0	1	1	0	0	0	1	0	1	0	0	0	0	1	1	1	1
		-0.983815	1	0	0	0	0	0	0	1	0	0	0	0	0	0	0	0	0	0	1		1	1	1	1	1	1	1	1	0	1	0	1	1	1	1	1	1	0	1
		-0.967982	0	0	0	1	1	0	0	0	1	0	1	0	1	0	1	1	0	0	0		0	1	0	0	1	0	1	1	1	1	1	1	0	1	1	1	1	0	1
		-0.942402	0	0	1	0	0	0	0	0	0	0	0	0	1	0	1	0	1	0	1		1	0	0	0	0	0	1	1	1	1	1	1	0	1	1	0	0	0	0
		-0.907315	0	0	0	0	0	0	0	0	0	1	0	1	0	1	0	1	0	0	0		0	1	0	0	0	0	1	1	0	0	0	1	1	0	0	1	1	0	0
		-0.863067	0	0	1	0	1	1	1	0	1	0	0	0	0	1	0	1	1	0	0		1	0	0	1	1	0	1	0	0	0	1	0	0	1	0	0	0	1	0
		-0.810105	0	0	0	0	0	1	1	0	0	1	0	1	1	0	1	0	0	1	0		1	1	1	1	1	1	0	1	0	0	0	0	1	1	0	0	1	1	0
		-0.748962	1	1	1	1	1	0	0	1	0	0	0	0	0	0	1	0	0	0	0		0	1	1	1	0	1	1	0	1	0	0	1	0	0	0	1	1	1	1
		-0.680256	1	0	0	1	0	0	0	0	0	0	1	0	0	0	0	0	0	1	0		0	0	1	1	1	1	1	1	1	1	0	1	1	1	1	0	0	0	1
		-0.604681	0	0	0	1	0	0	0	1	0	0	0	0	0	1	0	0	0	1	0		0	1	1	0	0	1	1	1	0	0	0	1	1	0	0	1	1	1	0
		-0.522999	0	0	0	0	1	0	1	0	0	1	0	1	1	0	0	1	1	0	1		0	0	0	1	1	0	0	0	1	1	1	0	0	1	1	0	0	1	1
		-0.436037	1	0	1	0	0	1	1	0	1	0	1	1	0	1	1	0	0	0	1		1	1	1	0	1	1	0	0	0	1	1	0	1	0	1	1	1	1	1
		-0.344671	0	1	1	0	0	0	0	1	1	0	1	0	0	0	0	0	0	1	0		1	1	1	1	1	0	1	1	1	1	1	1	1	1	1	1	1	1	1
		-0.249825	0	1	0	0	0	1	1	0	0	1	0	1	1	0	0	0	0	1	0		1	1	1	1	0	1	1	1	1	1	1	1	1	1	1	1	0	0	1
		-0.152456	1	1	0	1	0	1	0	0	0	1	0	0	0	1	0	1	1	0	0		1	1	0	0	0	1	1	1	1	0	0	1	0	0	0	0	1	1	0
		-0.0535474	0	0	1	0	1	0	1	1	0	0	1	1	0	1	1	1	0	0	1		0	0	0	1	1	0	0	0	0	1	1	0	1	1	1	1	1	0	1
		0.0459018	1	0	0	0	0	0	0	1	1	0	0	0	0	0	1	0	1	0	1		1	1	1	0	1	1	0	1	1	1	1	1	1	1	1	1	1	1	1
		0.144887	1	1	1	0	1	0	0	0	0	0	0	1	1	0	0	0	0	0	1		1	1	1	1	1	1	1	1	1	1	1	1	1	1	1	1	1	0	1
		0.24241	0	0	0	1	0	0	1	0	1	1	1	0	1	0	0	0	0	1	0		1	0	1	1	1	1	1	1	1	1	1	1	1	0	1	0	0	1	0
		0.337485	0	0	1	1	0	0	0	0	0	0	0	0	0	0	1	0	1	1	0		0	1	0	0	0	1	1	0	0	0	0	1	0	0	0	1	1	1	1
		0.429152	1	0	0	0	1	1	1	1	1	0	0	1	0	1	1	0	1	0	0		1	1	1	1	1	0	0	1	1	0	1	0	0	1	1	1	0	1	1
		0.516485	1	0	1	0	1	0	0	0	1	1	1	0	1	0	0	0	1	0	1		1	1	1	1	1	1	1	1	0	1	1	0	1	1	1	1	1	1	1
		0.598603	1	1	0	0	0	0	1	1	0	1	0	1	1	1	0	1	0	0	1		1	1	1	1	1	1	1	1	1	1	1	1	1	1	1	0	1	0	0
		0.674676	0	1	0	1	0	1	0	1	0	1	0	0	0	0	0	1	1	1	0		1	0	1	1	0	1	1	1	1	1	0	1	1	1	0	0	0	1	0
		0.743936	0	0	0	1	0	0	0	0	1	0	0	0	0	1	0	1	0	0	0		0	0	0	0	0	0	0	0	0	0	1	1	0	0	1	1	1	1	1
		0.805684	0	0	1	0	1	1	0	0	0	0	1	0	0	0	1	0	0	0	1		1	1	1	1	1	1	1	0	1	1	1	0	1	1	1	1	1	1	1
		0.859296	1	1	1	1	0	1	1	0	1	1	1	1	0	0	1	0	1	1	0		1	1	1	1	1	1	0	1	0	1	1	0	1	1	0	1	1	0	1
		0.904232	0	1	0	0	0	1	0	0	0	0	0	0	1	1	0	0	0	0	0		0	1	1	1	1	0	1	1	1	1	1	1	1	1	1	0	0	1	1
		0.940036	1	1	0	1	1	0	0	1	0	0	1	0	1	1	0	1	1	1	0		1	1	0	0	0	1	1	1	1	0	0	1	1	0	0	1	1	0	0
		0.966348	0	0	0	0	1	0	1	1	1	1	0	1	0	0	0	0	0	0	1		0	0	1	0	1	0	0	0	0	1	0	0	0	0	1	0	1	0	1
		0.982901	0	0	0	0	0	0	0	0	0	0	0	0	0	0	0	0	1	0	1		1	1	0	1	1	1	1	1	1	0	1	1	1	1	0	1	0	1	0
		0.98953	0	0	0	0	0	1	1	0	0	0	0	0	1	0	1	1	0	0	0		1	0	1	1	0	1	1	1	1	1	1	0	0	1	1	1	1	1	1
		0.986166	1	1	0	0	1	0	1	1	0	1	0	0	0	0	0	1	0	1	0		1	1	1	0	1	1	0	0	1	0	0	1	0	0	0	0	0	0	0
		0.972844	0	0	1	0	0	0	0	1	0	0	1	1	0	0	1	0	0	0	1		0	0	0	0	0	0	1	0	0	0	0	1	1	1	1	1	0	0	1
		0.949698	1	0	0	1	0	1	0	0	1	0	0	1	1	0	0	0	1	0	0		0	0	1	1	1	1	0	0	0	1	1	0	0	0	1	0	1	0	1
		0.916962	0	1	0	0	0	0	0	0	0	1	0	0	0	0	1	0	0	0	0		0	1	0	1	0	0	0	1	0	1	1	0	1	1	0	1	0	1	0
		0.874966	0	0	0	1	0	1	0	0	0	0	1	0	0	1	0	1	0	0	0		0	0	0	0	1	0	1	1	0	0	1	0	1	0	0	0	0	0	0
		0.824136	0	0	1	0	0	0	0	0	1	0	0	1	0	1	0	1	0	0	0		0	0	0	0	0	0	1	0	0	0	0	1	0	1	0	0	0	1	0
		0.764983	0	0	0	0	0	0	1	0	0	0	0	0	0	0	1	0	0	0	0		1	0	0	0	0	0	0	0	0	1	0	0	0	0	0	0	1	0	0
		0.698105	0	0	0	0	0	0	0	0	0	0	0	0	0	0	1	0	0	0	1		1	0	0	0	0	0	0	0	0	0	0	1	0	0	1	0	1	1	1
		0.624178	0	0	1	0	1	0	0	1	1	1	0	0	0	1	0	0	0	0	1		0	0	1	1	0	1	0	0	1	0	0	0	0	1	1	0	0	0	1
		0.543948	0	0	0	0	0	0	0	0	0	0	0	0	0	0	0	0	0	1	0		1	0	0	0	0	1	0	1	1	0	0	0	0	0	0	0	0	0	0
		0.458225	0	0	1	1	1	0	0	0	0	0	0	0	1	0	0	0	1	0	1		0	0	0	0	0	0	0	0	1	0	0	0	0	0	0	0	0	0	0
		0.367875	0	0	0	0	0	1	0	0	1	0	0	0	0	0	0	0	0	0	0		0	1	0	0	0	0	0	0	0	0	0	0	0	0	0	1	0	0	0
		0.273811	0	0	0	1	0	0	0	0	0	0	0	0	0	0	0	0	0	1	0		1	1	0	0	1	0	0	0	0	0	0	1	1	0	0	1	0	0	0
		0.176981	0	0	0	0	0	0	0	1	0	0	0	1	0	0	0	0	0	0	0		0	1	0	0	1	0	0	0	0	0	0	1	1	0	0	0	0	0	0
		0.0783644	1	1	0	0	0	0	0	0	0	0	0	0	0	0	0	0	0	0	0		0	0	0	0	0	0	0	1	0	0	0	0	0	0	0	0	0	1	0
		-0.0210437	0	0	0	0	0	0	0	0	0	0	1	0	0	0	0	0	0	0	0		0	0	0	0	0	0	1	0	0	1	1	0	0	0	0	0	0	0	0
		-0.120239	0	0	0	0	0	0	0	0	0	0	0	0	0	0	0	0	0	0	0		0	0	1	0	0	0	1	1	0	0	1	0	0	0	0	0	1	1	0
		-0.218221	0	1	0	0	0	0	1	0	0	1	0	0	0	0	0	1	0	0	0		0	0	1	0	0	1	0	0	0	0	0	0	0	0	0	0	0	0	1
		-0.313999	0	0	0	0	0	0	1	0	0	0	0	0	1	0	0	0	0	0	0		0	0	0	1	0	0	0	0	0	0	0	0	0	0	0	0	0	0	1
		-0.406606	1	0	1	0	1	1	0	0	0	0	0	0	0	0	0	0	0	0	0		0	0	0	0	0	1	0	0	0	0	0	0	0	0	0	0	0	0	0
		-0.495107	0	0	0	0	0	0	0	0	0	0	0	0	1	0	0	0	0	0	1		0	0	0	1	0	0	0	0	0	0	0	0	0	0	1	1	1	0	1
		-0.578609	0	0	0	0	0	0	0	0	1	0	1	0	0	1	0	0	1	0	0		1	0	0	0	1	0	0	0	1	1	0	0	0	1	1	1	0	0	0
		-0.656267	0	0	0	0	0	0	0	1	0	0	0	0	0	0	0	0	0	1	0		0	0	1	0	0	0	0	0	1	0	0	0	1	1	1	0	0	0	0
		-0.727299	0	0	1	0	0	0	0	0	0	0	0	0	0	0	1	0	0	1	0		0	1	0	0	0	0	0	0	0	0	1	1	0	0	0	0	0	0	0
		-0.790987	1	0	0	0	0	0	0	0	0	0	0	0	0	0	0	0	0	0	0		0	0	0	0	0	0	0	1	0	1	0	0	0	0	0	0	0	0	0
		-0.846687	0	0	0	0	1	0	0	0	0	0	0	0	0	1	0	0	0	0	0		0	1	0	0	1	0	0	0	0	0	1	0	1	0	0	0	1	0	0
		-0.893838	0	1	1	1	0	0	0	0	0	1	0	0	0	0	0	0	1	0	0		0	0	0	0	0	0	0	1	0	0	0	0	0	0	0	0	0	1	0
		-0.931962	0	0	0	0	0	0	0	0	0	0	0	1	0	0	0	0	0	0	0		0	0	1	1	0	0	0	0	1	1	1	0	0	0	0	1	1	1	0
		-0.960676	0	0	0	0	0	0	0	0	0	1	0	0	1	0	0	0	1	1	0		1	0	0	1	0	0	1	0	1	0	1	1	0	1	0	1	0	0	0
		-0.979689	0	0	0	1	0	1	1	1	1	0	0	0	0	0	0	0	0	0	0		0	0	1	0	0	1	1	1	0	0	0	1	0	0	0	0	0	1	1
		-0.988808	0	0	0	0	0	0	0	0	0	0	1	0	0	0	1	1	0	0	0		1	0	0	1	1	0	0	0	0	0	0	0	1	1	1	0	1	0	1
		-0.987943	0	0	0	1	0	0	0	0	1	0	1	1	0	0	0	0	0	0	0		1	1	1	1	0	1	1	1	1	1	0	1	1	1	1	0	0	0	1
		-0.977102	0	1	1	0	0	1	0	0	1	0	0	0	0	1	0	1	0	0	0		0	1	1	0	1	1	0	0	0	1	0	0	0	1	1	1	0	0	0
		-0.956394	0	0	0	0	0	1	0	0	0	0	0	1	0	1	1	0	0	0	0		1	0	0	0	0	1	1	0	0	0	0	0	1	0	0	0	0	0	1
		-0.926028	1	0	0	0	1	0	0	0	0	0	0	0	0	1	0	0	0	0	0		0	0	0	0	1	1	1	1	0	0	0	1	1	0	1	1	1	1	0
		-0.886312	1	0	0	0	1	0	1	0	0	1	0	0	0	0	1	1	0	1	1		1	1	0	0	0	0	0	0	0	0	1	0	0	0	0	0	0	1	1
		-0.837645	0	0	0	1	0	0	0	1	0	0	0	0	0	0	0	0	0	0	0		0	1	0	1	1	0	1	1	1	0	1	1	1	0	0	1	1	1	1
		-0.78052	0	0	0	0	1	0	0	1	0	1	0	0	1	0	0	1	1	1	0		1	0	1	1	1	1	1	1	1	1	1	0	1	1	1	1	1	1	0
		-0.715513	0	0	0	0	0	1	0	0	0	0	1	1	0	1	1	1	1	1	1		1	1	1	1	1	1	1	1	1	1	1	1	0	1	1	0	0	0	0
		-0.643281	0	1	1	0	0	1	0	0	0	0	1	1	1	0	0	0	0	0	1		0	0	0	1	0	0	0	0	0	1	1	1	0	0	0	1	1	1	0
		-0.564553	0	1	0	1	0	0	0	0	1	1	1	0	0	0	0	0	1	1	1		1	1	1	0	1	0	0	1	1	0	0	0	0	1	1	0	1	1	1
		-0.480125	1	0	0	1	0	0	1	1	0	0	0	1	0	0	0	0	0	0	0		1	1	1	1	1	1	1	0	1	1	1	0	1	1	1	1	0	1	1
		-0.390848	0	0	1	0	1	0	1	1	0	1	0	0	1	1	0	0	1	0	0		1	1	1	1	1	1	1	1	1	1	1	0	1	0	1	1	1	0	1
		-0.297624	1	1	0	0	1	1	0	1	1	0	0	0	0	0	0	1	0	0	1		0	0	1	1	0	1	1	1	1	1	1	1	1	1	0	0	0	1	0
		chirp phase 2
		Stimulus	Neuron 1																				Neuron 2
			Trial 1	Trial 2	Trial 3	Trial 4	Trial 5	Trial 6	Trial 7	Trial 8	Trial 9	Trial 10	Trial 11	Trial 12	Trial 13	Trial 14	Trial 15	Trial 16	Trial 17	Trial 18	Trial 19		Trial 1	Trial 2	Trial 3	Trial 4	Trial 5	Trial 6	Trial 7	Trial 8	Trial 9	Trial 10	Trial 11	Trial 12	Trial 13	Trial 14	Trial 15	Trial 16	Trial 17	Trial 18	Trial 19
		0.66283	1	0	1	0	0	1	1	0	0	0	0	1	0	0	0	1	0	1	0		0	1	1	0	1	1	1	1	0	1	1	0	1	1	1	1	1	1	1
		0.73324	1	0	0	1	0	0	0	0	1	1	0	0	1	1	1	1	0	0	1		1	0	1	1	1	1	0	1	1	0	1	1	1	1	0	1	1	0	1
		0.796246	0	1	0	1	0	0	0	0	1	0	0	0	0	0	0	0	1	0	0		1	1	1	1	0	1	1	1	0	1	1	1	0	0	1	1	1	1	0
		0.851211	1	0	1	0	1	1	1	1	0	1	1	0	0	0	1	0	1	1	0		0	1	0	0	1	0	1	0	0	1	0	1	0	1	0	0	1	1	1
		0.897581	0	0	1	0	0	0	0	0	0	1	0	1	1	1	1	0	0	1	0		1	1	1	0	1	0	1	1	1	0	1	1	1	1	1	1	0	1	1
		0.934887	1	0	0	1	0	0	1	0	1	0	0	0	0	0	0	1	0	0	1		1	0	1	1	0	1	0	0	0	0	0	0	1	0	1	1	0	0	1
		0.962753	0	0	1	0	1	0	0	1	1	0	1	1	0	0	1	0	0	0	0		1	1	1	1	1	1	1	0	1	1	1	0	1	1	0	1	1	1	0
		0.980896	0	1	0	0	0	1	0	0	0	0	0	0	1	0	0	0	1	0	0		1	0	0	0	1	1	1	1	1	0	1	1	0	1	1	0	0	1	0
		0.989135	0	0	1	1	0	0	0	1	0	0	1	0	0	0	0	1	0	0	0		0	1	0	1	0	0	1	0	1	1	0	1	0	0	1	0	1	0	0
		0.987386	0	0	0	0	0	1	1	0	0	1	0	1	0	0	1	0	0	1	0		0	1	0	0	1	1	0	1	0	1	0	0	1	0	0	0	0	0	1
		0.975666	1	1	0	0	1	0	0	0	0	0	0	0	0	1	0	0	0	1	0		0	0	1	1	1	0	0	1	0	1	0	0	0	1	0	1	1	0	1
		0.954093	1	0	0	0	1	0	0	0	0	0	0	0	0	0	0	1	1	0	1		0	0	1	1	0	0	0	1	1	0	0	1	1	0	0	0	1	0	0
		0.922886	0	0	0	0	0	0	0	0	0	0	1	0	0	0	0	0	0	0	1		1	0	0	0	0	0	0	0	0	0	1	0	0	1	0	0	0	1	0
		0.88236	0	1	0	0	0	0	0	0	1	1	0	0	0	1	0	0	0	0	0		0	0	1	0	0	0	1	1	0	0	0	1	1	0	1	0	0	1	1
		0.832924	0	0	0	0	0	0	1	0	0	0	0	1	0	1	0	1	1	0	0		1	1	0	0	0	1	0	0	0	1	1	0	0	0	1	1	0	0	0
		0.775078	0	1	0	1	0	0	0	1	1	1	0	0	1	0	0	1	1	0	0		0	0	0	0	1	1	1	0	1	0	1	0	0	1	0	1	0	1	1
		0.709404	0	0	1	1	0	0	0	0	0	0	0	0	1	0	1	0	0	0	1		0	1	0	1	0	0	0	0	1	0	0	1	0	1	0	0	1	0	0
		0.636567	0	0	0	0	0	1	0	0	0	0	0	1	0	1	0	0	1	1	1		1	0	0	1	1	0	0	0	0	1	0	0	0	1	1	0	0	0	0
		0.557302	1	0	0	0	0	0	0	1	0	0	0	0	0	0	0	0	0	0	0		0	0	1	0	0	0	0	1	0	1	0	1	1	0	1	1	0	0	0
		0.472409	0	0	0	0	0	0	1	0	0	1	0	0	0	0	0	0	0	0	0		0	0	1	0	0	0	0	1	0	0	0	0	1	0	0	0	0	0	0
		0.382746	0	0	0	0	0	0	0	0	0	0	0	0	1	0	1	1	0	0	0		0	0	0	0	0	1	0	0	0	0	0	0	0	0	0	0	0	0	0
		0.289218	0	0	0	0	1	0	0	0	0	0	0	0	0	0	0	0	0	1	0		0	0	0	0	0	0	1	0	0	0	0	0	0	0	0	0	1	0	1
		0.192769	0	0	0	0	0	0	0	0	1	0	0	0	0	0	0	1	0	0	0		0	0	0	1	0	0	0	0	1	0	0	0	0	0	0	1	0	0	1
		0.0943741	0	0	0	0	1	0	0	0	0	0	0	0	0	0	0	0	0	0	0		1	0	0	0	0	0	0	0	0	0	1	0	0	0	0	0	0	1	0
		-0.00497405	0	0	0	0	0	0	0	1	0	0	0	1	0	1	0	0	0	0	0		1	1	0	1	0	0	1	0	1	0	1	0	0	0	0	0	0	0	0
		-0.104272	0	0	0	0	0	0	0	0	0	0	1	1	0	0	0	0	0	0	0		0	0	0	0	1	0	0	0	0	0	0	0	0	0	0	0	0	1	0
		-0.202517	0	1	1	0	0	0	0	0	0	0	1	0	1	0	0	0	0	0	0		0	1	0	0	1	0	0	0	0	0	0	1	0	0	0	0	1	0	0
		-0.298717	0	0	0	0	0	1	1	0	0	0	0	0	0	0	0	0	0	0	0		0	1	0	0	0	0	0	0	0	0	0	1	0	0	1	0	0	0	0
		-0.3919	0	0	1	1	0	0	1	0	0	0	0	0	0	0	0	1	0	0	0		0	0	0	0	0	0	0	0	0	0	0	0	0	0	1	0	0	0	0
		-0.481126	0	0	0	0	0	0	0	0	0	0	0	0	0	0	0	1	0	0	0		0	0	1	0	0	0	0	0	0	0	0	0	0	1	0	0	0	0	0
		-0.565494	0	0	0	0	0	0	0	0	0	0	0	0	0	0	0	0	1	0	0		0	0	0	0	0	1	0	1	0	0	0	0	0	1	0	0	0	0	0
		-0.644151	1	0	0	0	0	0	0	0	1	0	1	0	0	1	0	0	0	1	1		0	0	1	0	0	0	1	0	0	1	0	0	1	0	0	0	0	0	0
		-0.716304	0	0	0	0	0	1	1	1	1	0	0	0	0	0	0	0	0	0	0		0	0	0	0	0	1	0	1	0	1	0	0	1	0	0	1	1	0	0
		-0.781224	0	0	0	0	1	0	0	0	0	0	0	1	0	0	0	0	1	0	1		1	0	0	0	0	0	0	0	1	0	1	0	1	0	0	1	1	0	0
		-0.838254	0	0	1	1	0	0	0	0	0	0	1	0	0	0	0	0	0	0	0		1	0	0	0	0	0	1	0	0	0	0	0	0	0	0	0	0	0	0
		-0.88682	1	0	0	0	0	0	0	1	0	0	0	0	0	0	0	1	0	0	0		0	0	0	0	1	0	0	0	0	0	1	0	0	0	0	0	0	1	0
		-0.926431	0	0	0	0	0	1	0	0	0	1	0	0	1	0	0	0	0	0	0		0	1	0	1	1	0	0	1	0	0	0	0	0	1	0	0	0	1	1
		-0.956687	1	0	0	0	0	0	0	0	0	0	0	1	0	0	0	0	0	0	0		0	1	0	0	1	0	0	0	0	0	0	0	0	0	1	0	0	0	1
		-0.977283	0	0	0	0	0	0	0	0	0	0	0	0	0	0	1	0	0	0	0		1	0	0	1	0	0	0	0	1	0	1	0	0	1	1	1	1	0	0
		-0.988009	0	0	0	0	0	0	0	0	0	1	0	0	0	1	1	0	0	0	1		1	0	1	0	0	0	0	0	1	1	0	1	0	0	0	1	1	0	0
		-0.988759	0	1	0	0	0	0	1	0	0	0	0	0	0	0	1	0	0	0	0		0	1	0	1	0	1	0	0	1	0	0	1	0	0	0	0	0	1	0
		-0.979524	0	0	1	0	0	0	0	1	1	0	0	0	0	0	0	0	0	0	0		0	0	1	1	0	0	1	1	0	1	0	1	1	0	0	0	0	1	1
		-0.960399	0	0	0	0	0	0	1	0	0	0	0	1	0	0	0	0	1	0	0		0	1	1	0	0	1	1	1	0	1	1	1	1	0	1	0	0	1	1
		-0.931575	0	0	0	0	1	0	0	0	0	1	1	0	0	0	0	0	0	1	0		0	0	1	1	1	1	0	1	0	1	1	0	1	0	1	0	1	0	1
		-0.893344	0	1	0	0	1	1	0	0	0	0	0	0	1	0	0	0	0	0	0		1	1	0	0	0	1	1	0	1	0	0	0	1	1	0	0	1	0	0
		-0.846092	0	1	0	0	0	0	0	0	0	0	0	0	0	1	0	1	0	1	1		1	0	0	0	1	1	1	0	1	0	0	1	0	1	1	0	0	0	0
		-0.790296	0	0	0	1	0	1	0	0	0	1	0	0	0	0	1	1	0	1	0		0	1	0	1	1	0	1	0	0	0	0	1	0	1	1	1	0	1	1
		-0.72652	1	0	0	1	1	1	0	0	1	0	0	0	1	0	0	0	1	0	0		0	0	1	1	1	1	0	0	1	1	1	0	0	0	1	1	0	1	1
		-0.655407	1	0	0	1	0	0	0	1	0	0	0	0	1	0	0	0	1	0	1		1	0	1	0	0	0	0	1	0	1	1	0	1	1	0	1	1	0	1
		-0.577677	0	1	1	0	1	1	0	1	0	0	0	0	0	0	0	1	0	0	0		1	0	1	1	0	1	1	1	1	0	1	1	1	0	0	1	1	1	0
		-0.494115	0	0	0	0	0	0	1	0	1	1	1	1	0	1	1	1	0	0	0		1	1	1	1	1	1	1	1	1	1	1	1	0	1	1	0	1	0	0
		-0.405569	0	0	1	0	0	0	0	0	1	1	1	0	0	0	1	0	1	1	0		0	1	0	0	1	0	1	0	1	1	0	1	1	1	1	1	1	1	1
		-0.31294	1	0	1	1	0	0	1	1	1	0	0	1	0	1	0	0	0	1	1		1	1	1	0	1	1	0	1	1	1	1	0	1	0	1	1	0	1	1
		-0.217158	0	1	0	0	0	0	1	0	0	0	1	0	1	0	0	0	0	0	1		1	1	1	1	1	1	0	1	0	1	1	0	1	1	0	0	1	0	1
		-0.119162	0	1	1	0	0	1	0	1	0	0	0	1	0	0	0	0	1	1	0		1	0	1	1	0	1	1	0	1	0	1	1	0	0	1	1	1	1	0
		-0.0198316	1	0	0	1	0	0	1	1	1	0	0	0	0	1	0	1	0	0	0		1	1	0	1	1	1	1	1	1	0	1	1	1	1	0	0	1	1	0
		0.0802	1	1	1	1	1	1	0	0	0	1	0	1	0	1	1	1	0	1	0		0	0	0	1	1	0	1	0	1	1	0	1	1	1	1	1	0	1	1
		0.180852	0	0	0	0	0	0	0	0	0	1	1	1	1	0	1	0	1	1	1		1	1	1	0	1	1	1	1	0	1	1	1	1	1	1	1	1	1	1
		0.283115	0	0	0	1	1	0	1	0	1	0	0	0	1	0	0	0	1	0	1		1	1	1	1	1	1	0	1	1	1	1	0	1	0	1	1	1	0	1
		0.389523	0	1	1	0	1	1	0	0	0	0	1	0	0	1	1	0	0	1	1		1	0	1	1	0	1	1	1	0	0	0	1	1	1	0	1	1	1	0
		0.504079	1	0	1	0	0	1	1	0	0	0	1	0	0	0	1	1	0	0	0		1	1	0	1	1	1	1	1	1	1	1	1	0	1	1	0	1	1	1
		0.630642	0	0	0	1	0	0	1	1	1	1	0	0	1	0	0	1	0	1	1		0	1	1	1	1	0	1	0	1	1	0	1	1	1	1	1	0	1	1
		0.768155	1	0	0	1	1	1	0	1	0	1	0	1	0	1	1	0	1	0	0		1	1	1	0	0	1	0	1	0	1	1	0	1	0	1	1	1	0	1
		0.901197	1	1	1	0	1	0	0	0	1	0	0	0	1	0	1	0	1	0	1		1	0	1	1	0	0	1	1	1	0	1	1	0	1	0	1	0	1	0
		0.988395	0	1	0	0	0	0	1	1	0	0	1	1	0	1	0	0	0	0	0		0	1	0	0	1	0	0	0	1	1	0	0	0	1	0	0	0	0	1
		0.962165	1	0	1	0	0	0	0	0	0	0	1	0	0	0	0	1	1	0	0		0	0	0	0	0	0	0	0	0	0	0	0	0	0	0	0	0	0	0
		0.760216	0	0	0	0	0	0	0	0	0	1	0	0	0	0	0	0	0	0	0		0	0	0	0	0	0	0	0	0	0	0	0	0	0	0	0	0	0	0
		0.383957	0	0	0	0	0	0	0	0	0	0	0	0	0	0	0	0	0	0	0		0	0	0	0	0	0	0	0	0	0	0	0	0	0	0	0	0	0	0
		-0.0746922	0	0	0	0	0	0	0	0	0	0	0	1	0	0	0	0	0	0	0		0	0	0	0	0	0	0	0	0	0	0	0	0	0	0	0	0	0	0
		-0.48725	0	0	0	0	0	0	0	0	0	0	0	0	0	0	0	0	0	0	0		0	0	0	0	0	0	0	0	0	0	0	0	0	0	0	0	0	0	0
		-0.77305	0	1	0	1	0	0	0	0	0	0	0	0	0	0	0	0	0	0	0		0	0	0	0	0	0	0	0	0	0	0	0	0	0	0	0	0	0	0
		-0.926946	0	0	0	0	0	0	0	0	0	0	0	0	0	0	0	0	0	0	0		0	0	0	0	0	0	0	0	0	0	0	0	0	0	0	0	0	0	0
		-0.986385	0	0	0	0	0	0	0	0	0	0	1	0	0	0	0	0	0	0	0		0	0	0	0	0	0	0	0	0	0	0	0	0	0	0	0	0	0	0
		-0.991915	0	0	1	0	0	0	0	0	0	0	0	0	0	0	0	1	1	0	0		0	0	0	0	0	0	0	0	0	0	0	0	0	0	0	0	0	0	0
		-0.970295	0	0	0	0	0	0	0	0	0	0	0	0	0	0	0	0	0	0	0		0	0	0	0	0	0	0	0	0	0	0	0	0	0	0	0	0	0	0
		-0.934861	0	0	0	1	0	0	0	0	0	0	0	0	1	0	0	0	0	0	0		0	1	0	0	0	1	0	0	0	1	0	0	0	0	1	0	0	0	0
		-0.890815	0	0	0	0	0	0	0	0	0	1	0	0	0	0	0	0	0	1	0		0	0	0	0	1	1	0	0	0	1	1	0	1	0	1	0	1	0	1
		-0.839559	0	1	0	0	0	1	0	0	0	0	0	0	0	0	0	0	0	0	0		0	0	1	1	1	1	1	1	0	0	1	1	1	0	0	1	1	0	1
		-0.781192	0	1	0	0	0	0	0	0	0	0	0	0	0	1	0	0	0	1	0		1	1	1	1	0	1	1	1	0	0	1	1	0	1	1	1	1	1	0
		-0.715689	0	0	1	0	1	0	1	0	0	0	0	1	1	1	0	0	1	0	1		0	1	0	1	1	0	1	1	1	0	1	1	1	1	1	0	1	1	1
		-0.643298	1	0	0	0	1	1	1	1	0	1	1	0	0	0	0	1	0	1	0		1	1	1	1	1	0	1	0	1	0	0	1	1	1	1	1	0	1	1
		-0.564533	1	0	0	0	0	1	0	1	1	0	0	0	1	0	1	0	1	0	1		1	1	0	0	1	1	1	1	0	1	1	1	1	0	0	1	1	1	1
		-0.480107	0	0	1	1	0	0	0	0	1	0	1	1	0	1	1	1	1	1	0		1	0	1	1	1	1	0	1	1	1	0	0	1	1	0	1	1	0	0
		-0.39084	0	1	1	1	1	0	0	0	0	1	1	1	0	0	0	0	0	0	0		1	1	1	1	0	1	1	1	1	0	1	1	0	1	1	1	0	1	1
		-0.297621	1	0	1	1	0	0	1	0	1	0	0	0	1	1	0	1	0	0	1		1	0	0	1	1	0	1	1	1	1	1	1	1	1	1	0	1	1	1
		-0.201393	1	0	0	0	0	0	0	1	0	0	0	0	1	0	1	1	0	0	0		0	1	1	0	0	0	1	0	1	1	0	1	0	0	1	1	0	1	0
		-0.103131	0	1	0	0	0	0	0	0	0	0	0	0	0	0	0	0	1	0	1		1	1	1	1	1	1	1	1	0	1	1	0	1	1	0	1	1	1	1
		-0.0038271	0	1	0	1	1	1	1	1	1	0	0	1	0	1	0	1	1	0	0		1	0	1	1	1	1	0	1	1	1	1	0	1	1	1	1	1	0	0
		0.0955155	0	1	1	0	0	1	1	0	1	1	0	1	0	1	1	0	0	1	0		1	1	1	0	0	1	1	0	1	0	1	1	0	1	0	1	1	1	1
		0.193894	0	0	0	0	1	0	0	1	0	1	1	1	0	0	0	1	0	0	0		0	0	0	1	1	0	1	0	1	1	1	1	1	1	1	0	1	1	1
		0.290314	1	1	0	1	1	1	0	0	0	0	0	0	1	0	1	0	0	0	1		1	1	1	0	1	1	0	1	1	1	0	1	1	0	1	1	0	0	1
		0.383803	0	0	1	1	1	0	1	0	1	1	1	0	1	0	1	0	1	1	1		1	1	1	0	1	1	0	1	0	1	1	0	1	0	1	1	0	0	1
		0.473416	0	0	1	0	0	1	0	1	1	1	1	1	0	0	0	1	1	1	1		1	0	0	1	0	1	1	1	1	1	0	1	1	1	0	1	1	1	1
		0.558249	1	0	0	0	0	1	1	0	0	0	0	0	1	1	0	1	0	0	0		1	1	1	1	1	1	1	1	0	0	1	1	0	1	1	0	1	1	0
		0.637445	1	0	0	1	0	0	0	1	0	0	0	1	0	0	0	0	1	0	1		0	1	0	1	0	0	1	0	1	1	0	1	1	1	0	1	1	1	1
		0.710203	0	0	0	0	1	1	0	1	0	1	0	0	0	0	0	0	0	0	0		1	1	1	0	1	1	1	1	1	1	1	0	1	0	1	1	0	1	1
		0.77579	0	1	0	0	0	0	1	0	1	0	1	1	1	1	0	0	1	1	0		1	1	1	1	1	0	0	1	0	1	1	0	0	1	1	1	1	0	1
		0.833543	0	0	1	1	0	0	1	0	0	1	1	0	0	0	0	0	0	1	0		1	0	1	1	0	1	1	1	1	0	1	1	1	1	0	0	1	1	0
		0.882879	0	0	0	0	1	0	0	0	0	0	0	0	1	0	1	0	0	0	1		0	1	1	1	1	1	1	0	1	1	1	1	0	0	1	0	1	1	1
		0.9233	1	1	0	1	1	0	0	1	1	1	1	0	0	1	0	1	1	0	0		0	1	0	1	1	0	1	1	1	1	0	1	1	1	1	1	1	1	1
		0.954397	1	1	0	0	0	0	0	0	0	1	1	0	0	0	1	0	1	1	0		1	1	1	0	1	1	0	0	0	1	1	1	1	0	1	1	0	0	0
		0.975857	0	0	1	0	0	1	0	0	1	0	0	0	1	1	0	1	0	0	0		1	0	1	1	1	1	0	1	1	0	0	0	1	1	0	1	1	1	1
		0.987463	1	0	1	0	0	0	0	1	0	0	0	0	0	0	0	0	0	0	0		1	1	0	1	0	0	1	0	1	0	1	1	0	1	1	0	0	0	0
		0.989097	1	0	0	1	1	0	0	0	0	0	1	1	1	1	1	0	1	0	1		0	1	0	0	1	1	0	0	0	1	0	1	1	0	0	0	1	0	0
		0.980743	0	0	0	0	0	1	0	1	0	0	0	0	0	1	1	1	0	0	1		0	0	1	0	0	0	0	1	0	1	1	0	0	0	1	1	0	1	1
		0.962486	0	0	0	1	1	1	1	0	0	0	0	1	0	0	0	0	0	1	0		0	0	1	1	0	1	0	1	0	1	0	0	0	1	1	1	1	0	0
		0.93451	1	0	0	0	0	0	1	0	1	0	0	0	0	0	0	0	0	0	0		1	0	1	0	0	0	1	0	0	0	0	0	1	1	0	0	0	1	0
		0.897097	0	0	1	0	1	0	1	0	0	0	0	1	0	0	1	1	1	0	0		0	0	0	0	1	0	1	0	1	0	0	0	0	0	0	0	0	1	1
		0.850625	0	1	1	0	0	0	0	1	0	0	1	0	0	0	0	0	0	0	0		0	0	1	1	1	0	0	0	1	0	0	0	1	0	1	0	0	0	1
		0.795564	0	1	0	0	0	0	0	0	0	0	0	0	0	0	0	0	0	1	0		1	1	0	0	0	0	1	1	1	0	1	1	0	0	0	1	0	0	0
		0.732469	0	0	0	1	0	1	0	0	1	0	0	0	1	0	1	1	0	0	0		1	1	0	0	0	1	0	1	0	1	1	0	0	0	0	0	1	0	0
		0.661978	0	0	1	0	0	0	0	0	0	1	0	1	0	0	0	0	0	1	0		0	0	1	1	0	1	0	0	1	0	1	1	0	1	0	0	1	1	0
		0.584802	0	1	0	0	0	1	0	0	0	0	0	0	1	0	0	0	0	0	1		0	0	0	0	0	0	0	0	0	1	0	0	0	1	0	0	0	0	0
		0.501721	0	0	0	0	0	0	1	1	0	0	0	0	0	0	0	0	0	0	1		0	1	0	0	0	0	0	0	0	0	0	0	1	0	1	0	0	0	0
		0.413573	0	0	0	0	0	0	0	1	0	0	1	0	0	1	0	0	0	0	0		0	1	0	0	0	0	0	1	0	0	0	0	0	1	0	0	0	0	0
		0.321249	0	0	0	0	1	0	0	0	1	1	0	0	0	1	0	1	0	0	0		0	0	0	1	1	0	0	0	0	0	0	0	1	0	0	0	1	0	0
		0.225681	0	0	0	0	0	0	0	1	0	0	0	0	0	0	1	1	1	0	0		0	0	0	0	0	0	0	0	0	0	1	1	0	0	0	0	0	0	0
		0.127835	0	0	0	1	0	0	0	0	0	0	0	0	0	0	0	0	1	0	0		1	0	0	0	1	0	0	0	0	0	0	1	1	0	0	0	0	0	1
		0.0286971	0	0	0	0	0	1	0	0	0	0	0	0	0	0	0	0	0	0	0		0	0	0	0	0	0	1	0	0	0	0	0	0	0	0	0	0	0	0
		-0.0707303	1	1	0	0	0	0	1	0	0	0	0	0	0	0	0	0	0	1	0		0	0	0	0	0	0	0	1	0	0	0	0	0	0	0	1	0	0	1
		-0.169443	0	0	0	0	0	0	1	0	0	0	0	0	1	0	0	0	0	0	0		0	0	0	0	0	0	1	0	0	0	0	0	0	0	0	1	0	0	0
		-0.266446	0	1	0	0	0	1	0	0	0	1	0	1	0	0	0	0	0	0	0		0	0	0	0	0	1	0	0	0	0	0	0	0	0	1	0	0	0	0
		-0.360757	0	0	0	0	0	0	0	0	0	0	1	0	0	0	0	0	0	0	1		1	0	0	0	0	0	0	0	1	1	0	0	0	0	0	1	0	1	0
		-0.451426	0	0	0	0	0	0	0	1	0	0	0	0	0	0	0	0	0	0	0		0	0	1	0	0	1	0	0	0	1	0	0	0	1	0	0	0	1	0
		-0.537536	0	0	1	0	0	0	0	0	0	0	0	0	0	0	0	0	0	1	0		0	0	1	0	0	0	0	0	0	0	0	0	0	0	0	0	1	0	0
		-0.618218	1	0	0	0	0	0	0	0	0	0	0	0	0	0	0	0	0	0	0		0	0	0	0	0	0	0	0	0	0	0	0	0	0	0	0	0	0	0
		-0.692657	0	0	0	0	1	0	0	0	0	0	0	0	0	0	1	0	0	0	0		0	1	0	1	0	0	0	0	0	0	0	0	0	0	0	0	0	1	0
		-0.760102	0	0	1	0	0	1	0	1	0	1	0	0	0	0	0	0	1	0	0		0	1	0	1	0	0	0	0	1	0	0	0	0	0	0	0	0	0	0
		-0.819872	0	0	0	0	0	0	0	0	1	0	0	0	0	1	0	0	0	0	0		0	1	0	0	0	0	0	0	0	0	0	0	0	0	0	0	1	0	0
		-0.871362	0	0	0	1	0	0	0	0	0	0	0	0	0	0	0	0	0	0	0		1	0	1	1	1	1	1	1	0	0	1	0	0	0	0	0	1	0	1
		-0.914053	1	0	0	1	0	0	0	0	0	0	1	0	1	0	0	0	0	0	0		1	0	0	0	0	1	1	0	0	0	1	1	0	1	1	0	0	0	0
		-0.947515	0	0	0	0	0	0	0	0	0	0	0	0	0	0	0	0	0	0	1		0	0	0	0	1	0	0	0	0	1	0	1	1	1	1	0	0	0	1
		-0.971408	0	0	0	0	0	0	0	1	0	0	0	0	1	0	0	0	0	0	0		1	0	0	0	1	0	1	0	1	1	1	1	1	0	1	1	0	1	1
		-0.985492	0	0	0	1	1	0	1	0	0	0	0	0	0	0	0	0	0	0	0		0	0	1	0	0	0	0	0	0	1	0	0	1	1	1	1	0	1	1
		-0.989625	0	0	0	0	0	0	1	0	1	0	0	1	0	0	0	1	1	1	0		0	0	0	0	0	0	0	1	1	0	0	0	0	0	0	1	0	0	0
		-0.983764	1	0	0	1	0	0	0	0	1	0	0	0	0	1	0	1	0	0	0		0	1	0	1	0	0	0	1	1	0	0	1	0	0	0	0	0	1	0
		-0.96797	0	0	1	0	0	1	0	0	0	0	1	0	0	1	0	0	0	0	1		0	1	0	1	0	0	0	0	0	0	0	1	0	0	0	0	1	0	0
		-0.942401	0	1	0	0	0	0	0	1	0	1	0	0	0	0	0	1	1	1	0		1	0	1	1	0	1	1	1	0	0	1	1	1	0	0	1	0	0	0
		-0.907315	0	0	0	0	0	1	0	0	0	0	0	1	0	0	0	0	0	0	0		1	0	1	0	1	1	0	0	0	1	1	0	1	0	0	1	1	0	0
		-0.863068	1	0	0	0	0	0	0	0	0	1	0	1	0	1	1	0	0	0	1		0	0	1	0	1	1	1	0	1	0	0	0	0	1	0	0	1	0	1
		-0.810105	1	0	0	0	1	0	0	0	0	1	0	1	0	1	1	0	0	0	0		0	1	0	1	0	0	1	0	1	1	1	0	0	1	1	0	1	1	0
		-0.748962	0	0	1	0	0	1	0	1	0	0	0	0	1	0	0	1	0	0	0		0	1	0	1	1	0	0	0	1	1	0	0	1	1	0	1	1	1	1
		-0.680255	0	1	0	0	0	0	1	0	1	0	1	0	0	0	0	0	0	1	1		1	1	0	0	1	1	1	1	0	0	1	1	1	1	1	1	0	1	1
		-0.60468	0	1	1	1	1	0	1	0	1	0	0	0	0	0	1	0	0	0	1		1	0	1	0	1	1	1	1	0	1	0	0	1	0	1	0	0	1	1
		-0.522999	1	0	1	0	0	1	1	1	0	0	0	1	1	1	0	0	1	0	0		1	0	1	1	1	1	0	1	0	1	0	1	0	0	0	1	0	0	1
		-0.436036	0	1	0	1	1	0	0	0	0	0	1	0	1	0	0	0	0	0	0		0	1	1	1	0	1	1	1	1	0	1	1	1	1	1	1	1	1	0
		-0.34467	0	0	0	0	0	0	1	0	0	0	1	0	0	0	1	1	0	1	1		1	1	0	0	1	0	1	0	1	1	0	1	1	1	1	0	1	1	1
		-0.249824	0	0	0	0	0	0	0	0	0	1	0	1	0	0	0	0	0	0	0		0	1	1	1	1	1	1	1	1	0	1	1	0	1	1	1	1	0	1
		-0.152455	0	0	1	1	0	0	0	1	1	1	0	0	0	0	0	1	0	1	0		1	1	1	0	1	1	0	1	0	1	1	0	1	0	1	1	0	0	0
		-0.0535469	0	0	0	1	1	1	0	0	1	1	1	0	1	0	1	0	1	1	1		1	0	1	1	0	1	1	1	1	1	1	1	1	1	0	0	1	1	1
		0.0459023	0	1	0	0	1	0	0	1	0	0	0	1	0	1	1	0	0	0	0		1	1	0	1	1	1	1	1	1	0	1	1	0	1	1	1	1	1	0
		0.144888	1	1	0	0	0	0	0	0	1	0	0	0	0	0	0	1	1	0	0		1	1	0	1	1	0	0	0	1	1	1	1	1	1	1	0	1	1	1
		0.24241	0	0	1	0	0	1	0	0	0	0	0	1	0	1	0	0	1	1	1		0	1	1	1	0	1	1	1	1	1	0	1	1	0	1	1	0	1	0
		0.337485	1	1	1	1	1	1	1	1	1	1	0	0	1	1	1	1	0	0	0		1	0	1	0	1	1	1	1	0	1	1	0	1	1	1	1	1	0	1
		0.429152	0	0	0	1	0	0	1	1	0	0	1	1	1	1	0	1	0	0	1		1	1	1	1	1	1	0	1	1	0	1	0	0	1	0	1	0	1	1
		0.516485	1	0	1	0	0	1	0	0	0	0	1	0	1	0	1	0	1	0	1		1	1	1	1	0	1	1	1	1	1	1	1	1	1	0	0	1	1	0
		chirp phase 3
		Stimulus	Neuron 1																				Neuron 2
			Trial 1	Trial 2	Trial 3	Trial 4	Trial 5	Trial 6	Trial 7	Trial 8	Trial 9	Trial 10	Trial 11	Trial 12	Trial 13	Trial 14	Trial 15	Trial 16	Trial 17	Trial 18	Trial 19		Trial 1	Trial 2	Trial 3	Trial 4	Trial 5	Trial 6	Trial 7	Trial 8	Trial 9	Trial 10	Trial 11	Trial 12	Trial 13	Trial 14	Trial 15	Trial 16	Trial 17	Trial 18	Trial 19
		0.980896	0	1	0	1	0	0	1	0	0	0	1	1	0	0	0	0	0	1	0		0	1	0	0	0	0	0	1	0	1	0	0	1	1	1	0	1	0	0
		0.989135	1	0	0	0	0	0	0	0	0	0	0	0	1	0	1	1	0	1	1		0	0	1	1	1	1	1	0	1	1	0	1	1	0	1	1	0	0	0
		0.987386	0	0	0	1	1	0	0	1	0	1	0	1	1	0	0	0	1	0	0		0	0	0	1	1	0	1	0	1	0	1	1	0	1	0	1	0	1	0
		0.975665	0	1	1	0	0	1	0	0	0	1	0	0	0	0	0	0	1	0	0		1	1	0	0	0	0	0	1	0	0	0	0	0	0	1	0	0	1	1
		0.954093	1	0	0	0	0	0	1	0	1	0	0	1	0	1	0	0	0	1	1		0	1	0	0	0	1	0	1	1	0	1	1	1	0	0	0	1	0	0
		0.922886	0	0	0	0	0	0	0	0	1	0	1	0	0	0	0	0	0	0	0		1	0	0	0	1	0	1	1	0	0	0	1	0	0	1	1	1	0	1
		0.88236	1	0	1	0	0	0	1	0	0	0	0	1	0	0	0	1	0	0	0		1	0	0	0	0	1	1	0	0	0	0	0	0	0	0	0	0	1	1
		0.832924	0	1	0	0	0	1	0	0	1	0	0	0	1	0	0	0	0	0	0		0	0	1	1	0	1	0	0	0	0	1	0	1	1	0	0	0	0	0
		0.775078	0	1	0	0	1	0	0	0	0	1	1	0	0	1	0	0	0	0	0		0	0	0	0	1	0	0	0	0	0	0	0	0	1	1	0	0	1	0
		0.709404	0	0	0	0	0	0	1	1	0	0	0	0	0	0	1	0	0	0	1		0	1	1	0	0	0	0	0	0	1	0	0	1	0	1	0	0	0	1
		0.636567	0	0	0	0	0	0	0	0	0	0	0	0	1	0	1	0	0	0	0		0	0	1	0	0	0	0	0	0	1	0	0	0	1	0	1	0	0	0
		0.557302	0	0	0	0	0	1	0	0	0	0	0	0	0	0	0	0	0	1	0		0	1	1	0	0	0	0	0	1	0	0	1	0	0	0	1	0	0	0
		0.472409	0	0	1	0	0	0	0	0	1	0	0	0	0	0	0	0	0	0	0		1	0	0	1	0	0	0	0	1	0	0	0	0	0	0	0	0	0	0
		0.382746	1	0	1	0	1	0	0	0	0	0	1	0	0	0	0	0	0	1	0		0	0	0	0	1	0	0	1	0	0	0	1	0	0	0	0	0	0	0
		0.289218	0	0	0	0	0	0	0	1	0	0	1	0	0	0	1	1	1	0	0		1	0	0	0	0	0	0	1	0	1	1	0	0	0	0	0	0	0	0
		0.192769	0	0	0	0	1	0	0	0	0	0	0	1	0	0	0	0	0	0	0		1	0	0	0	0	0	0	0	0	0	1	0	0	0	0	0	1	0	0
		0.0943741	0	0	0	0	0	1	0	0	0	0	0	0	0	0	0	0	0	0	0		0	0	0	0	0	0	1	0	0	0	0	0	0	0	0	0	0	0	1
		-0.00497406	0	0	0	1	0	0	0	0	0	0	0	0	1	0	0	0	0	0	0		0	1	0	0	0	0	1	0	0	0	0	0	0	0	0	0	1	0	0
		-0.104272	0	0	0	1	0	0	0	0	0	0	0	0	0	1	0	0	0	0	0		0	0	0	0	0	1	0	0	0	0	0	0	0	0	0	0	0	1	0
		-0.202517	0	0	0	0	0	0	0	0	0	0	0	0	0	0	0	1	0	0	0		0	0	0	0	1	0	0	0	1	0	0	0	1	1	0	0	0	0	0
		-0.298717	0	1	0	0	0	0	0	0	1	0	0	0	0	0	0	0	0	0	1		0	0	0	1	1	1	0	0	0	0	0	0	0	1	0	0	0	1	0
		-0.3919	0	0	0	1	0	0	0	0	1	0	0	0	0	1	0	0	0	0	0		0	0	0	1	0	0	0	0	0	0	0	0	1	0	0	0	0	0	0
		-0.481126	0	0	1	0	0	0	0	0	0	1	0	1	0	0	0	0	0	0	0		0	0	1	0	0	0	0	0	0	1	0	0	0	0	1	1	0	0	0
		-0.565494	0	0	0	0	0	0	1	0	0	1	0	0	0	0	0	0	0	0	0		0	1	1	0	0	0	0	0	0	1	0	1	0	0	1	0	0	0	1
		-0.644151	0	0	0	0	0	0	1	0	0	0	0	0	1	0	0	0	0	0	0		0	0	0	0	0	0	0	0	1	0	0	1	0	0	0	1	1	0	1
		-0.716304	0	0	0	0	0	0	0	1	0	0	0	0	0	0	0	0	0	0	0		0	0	0	0	0	0	1	0	0	0	0	1	0	0	0	0	0	0	0
		-0.781224	0	0	0	0	0	0	0	1	0	0	0	0	0	0	0	0	1	0	1		0	1	0	0	0	0	1	1	0	0	1	0	0	0	0	0	1	0	0
		-0.838254	0	0	0	0	0	0	0	0	0	0	0	0	0	0	0	0	0	0	0		0	0	0	1	0	0	0	1	0	1	1	0	0	0	0	0	1	0	0
		-0.88682	1	1	0	0	0	1	0	0	0	0	0	1	0	0	0	0	1	0	0		1	0	0	1	1	0	0	1	0	1	0	0	0	1	0	0	0	0	0
		-0.926431	0	0	0	0	0	1	1	0	0	0	0	0	0	0	0	0	0	0	0		1	0	0	0	0	0	0	0	0	0	1	0	1	1	0	0	0	0	0
		-0.956687	1	0	0	0	1	0	0	1	0	0	0	0	0	0	0	0	0	0	0		1	0	0	0	1	1	1	0	0	0	0	0	0	0	0	0	0	1	0
		-0.977283	0	0	0	1	0	0	0	0	0	0	1	0	0	1	0	0	0	0	0		0	0	0	0	0	1	1	0	1	0	0	0	1	0	1	1	0	1	1
		-0.988009	0	0	0	0	1	0	0	0	0	0	1	1	1	0	1	0	1	1	0		0	1	1	1	1	1	0	0	1	0	1	1	1	0	1	1	1	1	0
		-0.988759	0	0	1	0	0	0	0	0	1	0	0	0	0	0	1	1	0	1	0		0	0	1	1	0	0	0	1	0	1	0	1	0	0	1	1	1	0	1
		-0.979524	0	0	0	0	0	0	0	0	1	1	0	0	0	0	0	1	0	0	0		0	1	1	0	0	0	0	0	1	1	0	0	0	1	1	0	0	0	1
		-0.960399	1	1	0	1	0	0	0	0	0	1	0	0	0	1	0	0	0	0	0		1	0	0	1	1	0	0	0	1	0	1	0	1	1	0	1	0	1	1
		-0.931575	0	1	1	0	0	1	1	1	0	0	1	0	0	0	0	0	0	1	1		1	0	0	0	0	0	0	1	0	0	1	0	0	0	0	0	0	1	0
		-0.893344	0	0	0	0	1	1	0	0	0	0	1	0	0	0	1	1	0	1	0		0	1	1	0	1	1	0	1	1	0	1	0	0	0	0	1	1	1	0
		-0.846092	0	0	1	1	0	0	1	0	0	0	0	1	0	0	0	0	0	0	1		1	1	1	1	1	1	1	0	0	0	0	1	1	1	1	0	1	0	1
		-0.790296	1	1	0	0	0	0	1	0	0	1	0	1	1	1	0	0	1	1	0		1	0	1	0	0	0	1	0	0	1	0	1	1	1	1	0	1	0	1
		-0.72652	0	0	0	0	1	0	0	0	1	0	1	0	0	0	1	0	1	0	0		1	1	0	1	1	1	1	0	0	1	1	1	0	1	0	1	1	0	0
		-0.655408	0	0	1	0	0	0	0	0	0	1	0	1	0	0	0	1	0	0	0		0	1	0	1	0	1	1	1	1	0	1	1	1	0	1	1	0	1	0
		-0.577677	0	0	0	0	0	0	1	1	0	0	0	0	1	0	0	1	0	0	1		0	0	1	1	1	1	1	1	1	1	1	0	0	0	1	1	1	1	0
		-0.494113	1	0	0	1	0	1	1	1	0	0	0	1	1	0	0	0	1	0	0		1	1	1	0	1	1	0	1	0	1	0	1	1	1	1	0	0	1	1
		-0.405559	1	0	0	0	1	0	0	0	0	0	0	0	0	0	0	0	1	1	0		1	0	1	0	0	0	1	1	1	1	1	1	1	1	0	1	1	0	1
		-0.31291	0	1	1	0	0	1	0	0	1	1	0	0	0	0	1	0	0	1	0		1	1	0	1	1	1	1	0	1	0	0	0	0	1	0	0	1	1	1
		-0.217101	0	0	0	1	1	0	0	0	0	1	1	1	0	1	0	1	0	0	1		1	1	1	1	0	1	1	1	1	1	1	0	1	0	1	1	0	1	1
		-0.1191	1	0	0	1	0	1	0	0	0	1	0	0	0	1	0	1	1	0	1		0	1	1	1	1	1	0	1	1	1	1	1	1	0	1	1	1	1	0
		-0.0198966	1	1	1	0	0	0	0	1	1	0	0	0	1	0	0	0	1	0	0		1	1	0	0	1	0	1	1	0	1	0	1	1	1	1	0	1	0	1
		0.079508	0	0	0	1	1	0	0	1	0	1	1	0	0	1	1	0	0	1	1		1	0	1	1	1	1	1	1	1	1	1	1	0	1	1	1	1	1	1
		0.178108	0	0	0	0	0	1	1	0	1	0	0	1	0	0	0	0	0	0	0		0	1	1	1	1	1	1	0	1	1	1	1	0	1	0	1	0	0	1
		0.274908	1	1	0	1	0	0	0	1	1	1	1	1	1	0	1	0	1	0	1		1	1	0	1	0	1	0	1	1	0	1	0	1	1	1	1	1	1	0
		0.368927	0	0	1	0	1	0	1	0	0	0	1	0	1	1	1	1	1	0	0		0	0	1	0	1	1	0	1	0	1	1	1	1	1	1	0	1	1	1
		0.459218	1	1	0	1	0	1	0	1	1	0	0	0	1	1	0	1	0	1	0		1	1	1	0	1	0	1	1	1	1	0	1	1	0	1	1	1	0	1
		0.544894	0	1	1	0	1	1	0	0	0	0	1	1	0	0	1	0	0	1	0		1	0	1	1	1	1	1	0	1	1	0	1	0	1	1	1	1	1	0
		0.625146	1	0	1	1	0	1	1	0	1	1	0	0	1	0	0	0	0	0	1		1	1	1	1	0	1	1	1	0	0	1	1	1	1	0	0	0	1	1
		0.699329	0	0	0	1	1	0	0	0	0	0	1	0	0	1	0	1	1	0	1		0	1	0	1	1	1	1	0	1	0	1	0	1	1	1	1	1	1	0
		0.767064	0	0	0	0	0	0	0	0	0	0	1	1	1	0	0	0	1	1	0		1	1	1	1	1	0	0	1	0	1	1	1	1	0	1	0	0	0	1
		0.82833	0	1	1	0	1	0	1	1	1	1	0	1	0	0	0	0	0	1	1		1	1	1	0	1	1	1	1	1	1	0	1	0	1	0	1	1	1	1
		0.883359	0	0	1	1	0	0	1	0	1	0	0	0	0	1	1	1	1	0	0		0	0	1	1	0	1	0	0	1	1	1	1	0	1	0	1	1	0	1
		0.931912	0	1	0	0	0	1	0	0	0	0	0	1	0	0	1	0	0	0	0		1	1	0	1	0	0	1	1	0	0	1	0	1	0	1	0	0	1	0
		0.971463	1	0	0	0	0	1	1	1	0	0	0	0	0	0	0	0	0	0	1		0	0	0	1	0	0	0	0	0	0	0	0	1	0	1	0	0	1	0
		0.993574	1	0	0	0	0	0	0	1	0	0	1	0	0	1	0	1	0	0	0		0	0	0	0	0	0	0	0	1	1	0	0	1	0	0	0	0	0	1
		0.978281	0	0	1	0	1	0	0	0	0	1	0	0	1	0	0	0	0	1	0		0	0	0	0	0	0	0	0	0	0	0	0	0	0	0	0	0	0	0
		0.889561	0	0	0	0	1	0	0	0	0	0	0	0	0	0	1	0	0	0	0		0	0	0	0	0	0	0	0	0	0	0	0	0	0	0	0	0	0	0
		0.682107	1	0	0	0	0	0	0	0	0	0	0	0	0	0	0	0	0	0	0		0	0	0	0	0	0	0	0	0	0	0	0	0	0	0	0	0	0	0
		0.331821	0	0	0	0	0	0	0	0	0	0	0	0	0	0	0	0	0	0	0		0	0	0	0	0	0	0	0	0	0	0	0	0	0	0	0	0	0	0
		-0.120094	0	0	0	0	0	0	0	0	0	0	0	0	0	0	0	0	0	0	0		0	0	0	0	0	0	0	0	0	0	0	0	0	0	0	0	0	0	0
		-0.559835	0	0	0	0	0	0	0	0	0	0	0	0	0	0	0	0	0	0	0		0	0	0	0	0	0	0	0	0	0	0	0	0	0	0	0	0	0	0
		-0.865985	0	0	0	0	0	0	0	0	0	0	0	0	0	0	0	0	0	0	0		0	0	0	0	0	0	0	0	0	0	0	0	0	0	0	0	0	0	0
		-0.990129	0	0	0	0	0	0	0	0	0	0	0	0	0	0	0	0	0	0	0		0	0	0	0	0	0	0	0	0	0	0	0	0	0	0	1	0	0	0
		-0.967918	0	0	0	0	0	0	0	0	0	0	0	0	0	0	0	0	0	0	0		0	0	0	0	1	0	0	1	0	0	0	0	0	0	0	0	0	0	0
		-0.867605	0	0	0	0	0	0	0	0	0	0	0	0	0	0	0	0	1	0	0		1	0	1	0	1	1	1	1	0	1	0	1	1	0	0	1	1	0	0
		-0.743001	0	0	0	0	0	0	0	0	0	0	0	0	0	0	0	0	0	1	0		1	1	1	0	1	1	1	0	1	1	1	1	0	1	1	0	1	1	1
		-0.620643	0	1	0	0	0	0	0	0	1	0	0	0	0	0	0	0	1	0	1		1	1	0	1	1	1	1	1	1	0	1	1	1	1	0	1	0	1	1
		-0.507713	0	0	0	0	1	0	1	1	0	1	0	1	1	1	0	0	0	0	1		1	1	1	1	0	0	0	1	1	1	1	0	1	1	1	1	1	1	0
		-0.402693	1	1	1	1	0	1	0	0	1	1	1	0	0	0	0	1	0	0	0		0	1	1	1	1	1	1	1	1	1	1	1	1	0	1	0	1	1	1
		-0.301975	1	0	1	0	1	1	0	1	0	0	1	0	1	1	1	1	0	1	0		1	0	1	0	1	0	1	0	0	1	0	1	1	1	1	1	1	0	1
		-0.202686	0	0	0	0	0	0	1	0	1	0	0	1	1	0	0	0	0	0	0		1	1	1	1	1	1	1	1	1	0	1	1	0	1	1	1	1	1	1
		-0.103376	0	0	1	0	0	1	0	0	1	0	1	1	0	0	1	1	0	0	1		1	1	1	1	0	1	0	0	1	1	1	0	0	1	0	0	0	1	1
		-0.00379885	1	1	1	1	0	1	1	0	0	0	0	0	0	1	0	0	1	1	1		0	1	0	1	1	1	1	1	1	1	1	1	1	1	1	1	1	1	0
		0.0955757	0	0	0	1	0	0	0	0	0	1	0	1	0	1	1	1	1	1	0		0	1	1	1	1	1	0	1	0	0	1	1	1	0	1	1	1	0	1
		0.193934	1	1	1	0	0	0	1	0	1	0	1	0	1	1	0	0	0	0	0		1	0	1	0	1	0	1	1	1	1	0	1	1	1	1	0	1	1	1
		0.290331	0	0	0	1	1	1	0	1	0	0	1	0	1	0	1	1	0	0	0		1	0	1	1	0	1	1	0	1	1	1	0	0	1	1	1	0	1	0
		0.383808	1	1	1	0	1	0	1	0	1	1	0	0	0	0	0	0	1	0	0		1	1	0	1	0	1	1	1	1	0	1	1	1	1	0	1	0	1	1
		0.473417	0	0	0	1	0	0	0	1	0	1	1	1	1	1	0	1	0	0	0		0	1	1	1	1	1	0	1	1	1	1	0	1	1	1	1	1	1	0
		0.558249	0	1	0	0	1	0	1	1	0	0	0	0	0	1	0	0	1	1	0		1	1	1	1	1	1	1	1	0	1	0	1	1	0	1	0	1	0	1
		0.637444	0	0	1	1	1	1	1	0	1	0	0	1	1	0	1	0	1	1	0		0	0	0	0	1	0	1	1	1	1	1	1	1	1	1	1	1	0	1
		0.710203	0	0	0	1	0	1	0	1	0	0	0	0	0	1	1	0	0	0	1		1	1	1	1	1	1	0	0	1	1	1	1	0	1	0	1	1	1	1
		0.77579	1	0	0	0	0	0	0	0	1	0	0	0	0	0	0	1	0	1	1		1	1	0	1	0	1	1	1	0	0	0	0	1	1	1	1	0	1	1
		0.833543	0	1	1	0	0	0	0	1	0	0	0	0	0	0	1	0	1	0	0		0	0	1	1	0	1	1	1	1	1	1	0	1	0	1	0	1	1	0
		0.882879	0	0	1	0	0	0	0	0	0	1	1	1	0	1	0	0	0	0	1		1	1	1	0	1	0	0	1	0	1	0	1	1	1	0	0	1	0	0
		0.9233	0	1	0	1	1	0	1	0	0	1	0	0	1	0	0	1	0	1	0		1	0	1	0	1	1	1	0	1	0	1	1	0	1	1	1	1	1	1
		0.954397	1	0	0	0	1	1	1	0	1	0	0	1	0	0	1	0	1	0	1		1	1	0	1	1	1	1	0	1	0	1	1	0	1	0	1	0	1	1
		0.975857	1	0	0	1	0	1	0	0	0	1	0	1	0	0	0	1	0	0	0		1	1	0	1	0	1	1	1	1	1	1	0	0	0	1	1	1	1	0
		0.987463	0	0	0	0	0	0	0	1	0	0	1	0	1	0	0	0	0	0	1		0	1	0	0	1	0	0	1	0	0	0	0	1	0	0	0	0	0	1
		0.989097	0	1	0	0	1	0	0	1	0	1	0	1	1	1	1	0	0	1	0		0	0	1	0	0	0	0	1	1	1	0	1	1	0	1	0	1	0	0
		0.980743	0	0	0	0	0	1	1	0	0	0	1	0	0	0	1	0	1	0	0		1	0	1	1	0	1	0	0	0	1	0	1	0	0	1	1	0	0	1
		0.962486	1	1	1	1	0	1	0	0	0	0	0	0	0	0	0	0	0	0	0		0	1	1	1	0	0	1	0	0	0	1	0	1	1	0	0	1	1	1
		0.93451	1	1	1	0	0	0	0	1	0	0	0	0	0	0	0	0	1	1	0		0	1	0	0	1	0	0	0	0	0	1	0	0	1	1	1	0	1	0
		0.897097	0	0	0	0	1	0	1	0	0	0	1	0	0	1	0	0	0	0	0		0	0	1	0	0	0	1	0	0	0	0	0	1	0	0	0	0	0	0
		0.850625	0	0	0	0	0	0	0	0	1	1	1	0	0	0	0	0	0	1	0		1	0	0	0	0	0	0	0	0	0	1	1	0	1	0	0	0	1	1
		0.795564	0	0	0	0	0	0	0	0	0	0	0	0	0	0	0	1	0	0	0		1	1	0	0	0	1	1	0	1	0	0	0	0	0	0	0	0	0	0
		0.732469	0	0	0	0	0	0	1	1	0	0	0	1	0	1	0	1	0	0	1		0	0	0	0	0	1	0	1	1	1	0	0	0	0	0	0	1	0	0
		0.661978	0	0	0	0	0	0	0	0	0	0	0	0	0	1	0	0	1	0	0		0	0	0	0	1	0	0	1	0	1	0	0	0	0	0	0	1	0	0
		0.584802	0	0	0	1	0	0	0	0	1	0	1	0	0	0	0	0	0	0	0		0	0	1	0	0	0	0	1	0	0	0	0	1	0	0	1	0	0	0
		0.501721	1	0	0	0	0	0	0	0	1	0	0	0	1	0	0	0	0	0	1		0	0	0	1	1	0	0	0	0	0	0	0	0	0	0	0	0	0	0
		0.413573	0	0	0	0	0	0	0	0	0	1	0	1	0	0	0	1	0	0	0		0	0	0	1	0	0	0	0	0	0	0	0	0	0	1	0	0	0	0
		0.321249	0	0	0	0	0	0	0	0	0	0	0	0	0	0	0	0	0	1	0		0	0	0	0	0	0	1	0	0	0	1	1	0	0	0	0	0	1	0
		0.225681	0	0	1	0	1	0	0	0	0	0	0	0	0	0	1	0	0	0	0		1	0	0	0	0	0	0	0	0	0	0	1	0	0	1	0	0	0	0
		0.127835	0	0	1	0	1	0	0	0	0	0	0	0	0	0	0	0	0	0	0		0	0	0	0	0	0	1	0	0	0	1	0	0	0	0	1	0	0	1
		0.0286971	0	0	0	0	0	1	0	0	0	0	0	0	0	0	1	0	0	0	0		0	1	0	0	0	1	0	0	1	0	0	0	0	0	0	1	0	0	1
		-0.0707303	0	1	0	0	0	0	0	1	0	0	0	0	1	0	0	0	0	0	0		0	1	0	1	0	1	0	0	1	0	0	0	0	0	0	0	0	0	0
		-0.169443	0	1	0	0	0	0	0	0	0	0	0	0	0	0	0	0	0	0	0		0	0	0	0	1	0	0	0	0	0	0	0	1	1	0	0	0	0	0
		-0.266446	0	0	0	0	0	0	0	0	0	0	0	0	0	0	0	0	0	0	0		0	0	1	0	0	0	0	0	0	1	0	0	1	0	1	0	1	0	0
		-0.360757	1	0	0	0	0	0	0	0	0	0	0	0	0	0	0	0	0	0	0		0	0	1	0	1	0	0	0	0	1	0	0	0	1	0	0	1	0	0
		-0.451426	0	0	0	0	0	0	0	0	0	0	1	1	0	0	0	0	0	0	0		0	0	0	0	0	0	0	0	0	0	0	1	0	1	0	0	0	0	0
		-0.537536	0	0	0	1	0	0	1	0	0	0	0	0	0	1	0	0	0	0	0		0	0	0	0	0	0	0	0	0	0	0	0	0	0	0	0	1	0	1
		-0.618218	0	0	0	0	0	1	0	0	0	0	0	0	0	0	0	0	0	0	0		0	0	0	0	0	0	0	0	0	0	0	0	0	0	0	0	0	0	0
		-0.692657	0	0	0	0	0	0	0	0	0	0	0	0	0	1	0	0	0	1	0		1	0	0	0	0	0	0	1	0	0	0	0	0	0	0	0	0	0	1
		-0.760102	0	0	0	0	0	1	0	0	0	0	0	0	1	0	0	0	0	0	1		1	1	0	0	0	1	0	1	1	0	0	1	0	0	0	0	0	0	0
		-0.819872	0	1	1	1	0	0	0	0	0	0	0	0	0	0	0	1	1	0	0		0	0	0	0	0	1	1	0	1	0	1	0	0	0	0	0	0	1	0
		-0.871362	0	0	0	0	0	0	0	0	0	0	0	0	0	0	0	0	1	0	0		1	0	0	1	0	0	1	0	0	0	1	0	1	0	0	1	0	1	0
		-0.914053	0	0	0	1	0	0	0	0	1	0	1	0	0	0	0	0	0	0	1		0	0	0	1	0	1	0	0	0	1	1	0	1	0	1	1	0	1	0
		-0.947515	1	0	0	0	1	0	0	0	0	1	0	0	0	0	1	0	0	0	0		1	0	1	0	1	0	1	0	0	1	0	0	0	0	1	0	0	0	1
		-0.971408	0	1	0	0	0	0	0	1	0	0	0	0	0	0	0	0	0	0	0		0	0	1	1	1	0	0	0	0	0	0	0	0	1	0	0	0	0	1
		-0.985492	0	0	0	0	0	0	1	1	0	0	0	0	0	0	0	0	1	1	1		0	1	1	0	0	0	0	1	1	0	0	0	0	1	1	0	1	0	0
		-0.989625	0	0	1	0	0	1	0	0	0	0	0	0	0	0	1	0	1	0	0		0	1	0	0	1	0	0	1	1	0	0	1	0	1	0	1	0	1	0
		-0.983764	0	0	0	0	0	0	0	0	0	1	0	0	0	0	0	0	0	0	0		0	1	1	0	0	0	0	0	0	0	0	1	0	0	0	0	1	0	0
		-0.96797	0	0	0	0	0	0	1	0	1	0	1	1	1	0	0	1	0	0	0		0	0	0	0	1	0	0	0	0	1	0	1	1	0	0	0	1	0	0
		-0.942401	1	0	0	0	0	0	0	0	0	0	0	1	1	1	0	0	0	0	0		1	0	1	0	0	1	0	1	1	1	1	0	1	1	1	0	1	1	0
		-0.907315	0	0	0	0	0	1	0	0	1	1	0	0	0	0	0	0	1	1	0		1	0	0	1	0	1	1	0	1	0	1	1	0	1	0	1	0	1	1
		-0.863068	0	0	1	0	1	0	0	1	0	1	0	0	0	0	0	1	0	0	1		1	1	0	1	1	1	1	1	0	1	1	0	1	0	1	1	1	0	1
		-0.810105	1	0	1	1	1	0	1	1	0	0	1	1	0	1	1	0	0	0	0		0	1	1	1	1	0	0	1	0	1	1	1	1	0	1	1	1	1	0
		-0.748962	0	0	0	0	0	1	0	0	0	0	0	0	1	1	1	1	0	1	0		1	1	1	1	0	0	1	1	1	1	0	1	0	1	0	0	0	0	1
		-0.680255	1	1	0	0	0	0	0	0	1	0	0	0	0	0	0	1	0	0	1		0	0	1	0	0	1	1	0	1	0	1	1	1	0	0	1	1	1	1
		-0.60468	0	1	0	1	1	0	1	1	0	1	1	0	1	0	0	0	0	1	0		1	1	0	1	1	1	1	1	1	0	1	0	0	1	0	1	0	0	1
		-0.522999	0	1	1	0	0	1	1	1	0	0	0	0	0	0	0	0	0	0	0		0	1	0	1	0	1	1	0	0	1	0	1	1	1	1	1	1	1	0
		-0.436036	0	0	0	1	1	0	0	0	0	0	0	1	0	1	1	0	0	1	0		1	1	0	1	1	1	0	0	0	1	1	0	1	0	1	0	0	1	0
		-0.34467	0	1	0	1	0	0	0	0	0	0	1	1	1	0	0	1	1	0	1		1	1	1	0	1	0	1	1	1	1	0	1	1	1	1	1	1	0	0
		-0.249824	1	0	0	0	0	1	1	0	1	0	1	0	1	0	0	1	1	0	1		1	0	1	1	1	1	0	1	1	1	1	1	0	1	1	1	1	1	1
		-0.152455	1	1	1	1	1	0	1	1	0	0	0	1	0	1	1	0	1	1	0		1	1	1	1	1	1	1	0	1	0	1	0	1	1	0	1	0	1	1
		-0.0535469	0	0	1	0	0	1	0	0	1	1	1	0	1	0	1	0	0	1	0		1	1	0	1	0	1	1	1	1	1	1	1	0	1	1	0	1	1	1
		0.0459023	0	0	0	0	0	0	0	0	1	1	1	0	0	0	0	1	0	0	0		0	1	1	1	1	1	0	1	1	1	1	1	1	0	1	0	1	1	0
		0.144888	0	0	1	0	1	0	1	1	0	0	0	0	0	0	1	1	1	1	1		1	0	1	0	1	0	1	1	0	1	0	0	1	0	1	1	0	0	1
		0.24241	1	1	0	0	0	1	0	0	1	1	0	1	0	1	0	0	1	0	1		1	0	1	0	1	0	1	1	1	0	1	1	1	1	1	1	1	1	1
		0.337485	1	1	0	1	1	0	0	1	0	1	0	0	0	0	1	0	0	0	0		1	1	0	1	0	1	1	0	1	0	1	0	0	1	0	1	0	1	1
		0.429152	0	0	0	1	0	0	0	1	0	0	0	1	0	0	0	0	0	0	0		0	1	0	1	1	1	1	1	1	1	1	1	1	0	1	1	1	1	0
		0.516485	0	1	1	0	0	1	0	0	1	1	0	1	0	1	1	1	0	0	1		1	1	1	1	1	1	0	1	0	1	1	1	1	1	1	0	1	0	1
		0.598603	1	0	0	1	0	1	0	1	0	0	0	1	0	0	0	1	0	0	0		1	0	1	0	1	0	1	1	1	1	0	1	1	1	1	1	1	1	1
		0.674676	1	0	1	0	1	0	1	0	1	1	1	0	1	0	0	0	0	0	0		0	1	1	1	1	1	1	0	1	1	1	1	0	1	0	1	1	1	1
		0.743936	0	1	1	1	0	0	1	0	0	0	1	1	1	1	1	0	1	1	1		1	1	1	1	0	1	1	1	0	0	1	0	1	1	0	1	0	1	1
		0.805684	0	1	0	0	1	0	0	0	0	0	0	0	0	1	0	0	0	1	0		0	1	0	1	1	1	0	1	1	1	0	1	1	1	1	1	1	0	0
		0.859297	1	0	0	0	0	1	0	1	0	0	0	0	1	0	1	1	1	0	0		1	0	1	0	0	0	0	1	0	1	1	1	0	0	1	0	1	0	1
		0.904232	0	1	1	0	0	1	0	0	1	1	0	0	0	1	0	1	0	1	1		1	0	1	1	1	1	1	1	1	1	0	1	0	1	1	0	0	1	1
		0.940036	1	0	0	1	1	0	0	0	1	0	1	1	1	1	1	0	1	0	1		1	1	1	0	1	1	1	0	1	0	1	0	1	1	0	0	0	1	1
		chirp phase 4
		Stimulus	Neuron 1																				Neuron 2
			Trial 1	Trial 2	Trial 3	Trial 4	Trial 5	Trial 6	Trial 7	Trial 8	Trial 9	Trial 10	Trial 11	Trial 12	Trial 13	Trial 14	Trial 15	Trial 16	Trial 17	Trial 18	Trial 19		Trial 1	Trial 2	Trial 3	Trial 4	Trial 5	Trial 6	Trial 7	Trial 8	Trial 9	Trial 10	Trial 11	Trial 12	Trial 13	Trial 14	Trial 15	Trial 16	Trial 17	Trial 18	Trial 19
		0.775077	0	0	0	0	0	0	0	1	0	0	0	0	1	0	0	0	0	0	0		1	0	0	1	0	0	0	0	0	0	1	0	1	1	0	1	0	0	0
		0.709404	0	0	0	0	0	0	0	1	0	1	0	0	0	0	0	0	0	0	0		0	0	1	0	0	0	0	0	0	1	1	0	0	0	0	0	0	0	1
		0.636567	0	0	0	1	1	0	0	0	1	0	0	0	0	0	0	0	0	0	0		1	0	1	0	1	0	0	0	1	1	1	0	1	0	0	1	0	0	0
		0.557301	0	0	0	0	0	0	0	0	0	0	0	0	0	0	0	1	0	0	0		0	1	0	1	0	1	0	0	0	0	0	0	1	0	0	0	0	1	0
		0.472409	1	1	0	0	0	1	0	0	0	0	0	0	0	0	0	0	0	1	1		0	1	0	0	0	1	0	1	0	0	0	1	0	0	0	0	0	1	0
		0.382746	0	0	1	0	0	0	0	0	0	0	0	0	0	0	0	1	0	0	0		0	0	0	0	0	0	0	0	0	0	0	0	0	0	0	0	0	0	0
		0.289217	0	0	0	0	0	0	0	0	0	0	0	0	0	0	0	0	0	0	0		0	0	0	0	0	0	1	0	0	1	0	1	0	0	0	0	1	0	0
		0.192769	0	0	0	0	0	1	0	0	0	0	0	0	0	1	1	0	0	1	0		0	0	0	0	0	0	0	0	0	1	0	0	0	1	1	0	0	0	0
		0.0943736	1	1	0	0	0	0	0	0	0	0	1	1	0	1	0	0	0	0	0		0	0	1	0	0	0	1	0	0	0	0	0	0	1	0	0	0	0	0
		-0.00497456	0	0	0	0	0	0	1	0	0	0	0	0	0	0	1	0	0	0	0		1	0	1	0	0	0	0	1	0	0	0	0	0	0	0	1	0	0	0
		-0.104272	0	0	0	0	0	0	0	1	0	0	0	0	0	0	0	0	0	0	0		0	0	0	0	0	0	0	0	0	0	0	0	0	0	0	0	1	0	0
		-0.202517	0	0	0	0	0	0	0	0	1	1	0	0	1	1	0	0	1	0	0		1	0	0	1	1	0	0	0	0	0	0	0	0	0	1	1	0	0	0
		-0.298717	0	0	0	0	0	0	0	1	1	0	0	1	0	0	0	0	0	0	0		0	0	0	0	1	0	0	0	0	0	1	0	1	0	0	0	0	1	1
		-0.391901	0	0	1	1	0	0	0	0	0	0	0	0	0	0	0	0	0	0	0		0	1	0	0	0	0	0	0	1	0	0	0	1	0	0	0	0	0	1
		-0.481127	0	0	0	1	0	0	0	0	0	0	0	0	0	0	0	0	0	0	1		0	1	0	0	0	1	0	1	1	0	0	0	0	0	0	0	0	0	1
		-0.565495	0	0	0	0	0	0	0	0	0	0	0	0	0	0	0	0	1	0	0		0	0	0	0	0	0	0	0	1	1	0	0	0	1	0	0	0	0	0
		-0.644152	0	0	0	0	0	0	0	0	0	0	0	0	0	0	0	0	0	0	0		0	0	0	1	0	0	0	0	0	1	0	0	0	0	0	0	0	0	0
		-0.716305	0	0	0	0	0	0	0	0	0	0	0	0	0	0	0	0	0	0	0		0	1	0	0	0	0	0	0	0	0	1	1	0	0	0	0	0	0	0
		-0.781225	0	0	0	0	1	0	1	0	0	0	0	0	0	0	0	0	0	0	0		0	0	0	1	0	0	1	0	0	0	0	1	0	0	1	0	1	0	0
		-0.838255	0	0	0	0	0	0	0	0	0	0	0	0	0	0	0	0	0	0	0		1	0	0	0	0	1	1	0	0	0	1	0	0	0	1	0	1	1	0
		-0.886821	0	0	0	0	0	0	0	0	0	0	0	0	1	0	0	0	0	1	0		0	0	1	1	0	1	0	0	0	0	1	0	0	0	0	0	0	1	0
		-0.926432	0	0	0	0	0	0	0	0	0	0	0	0	1	0	0	0	1	0	0		1	0	1	0	1	0	0	1	0	0	0	0	1	1	0	1	0	0	0
		-0.956688	1	0	0	0	0	0	0	0	0	0	1	1	0	0	1	0	0	0	0		0	0	1	0	1	1	0	0	0	0	0	0	1	1	0	1	0	0	0
		-0.977284	0	1	0	1	1	1	0	1	0	1	1	0	0	0	0	1	0	0	0		0	0	0	0	0	0	0	1	0	0	0	0	0	0	0	1	0	1	0
		-0.98801	0	0	1	0	0	1	1	0	0	1	1	0	0	0	1	0	0	1	1		0	0	0	1	1	0	1	1	1	0	0	0	0	0	0	0	0	1	1
		-0.98876	0	0	1	0	1	0	0	0	0	0	0	0	0	0	0	0	1	0	1		0	1	0	0	0	0	0	1	1	1	0	1	0	1	0	1	0	0	1
		-0.979525	0	0	0	1	0	0	0	0	0	0	0	1	0	0	1	1	0	0	0		0	1	0	0	0	0	0	0	0	1	0	1	1	1	0	0	1	0	0
		-0.9604	0	0	0	1	1	1	0	0	0	0	0	0	1	0	0	1	0	1	0		1	1	1	0	1	1	1	0	0	0	0	1	1	1	1	0	1	0	1
		-0.931576	1	1	0	0	0	0	0	0	1	0	0	0	0	1	0	0	0	0	0		1	1	1	1	1	1	0	0	1	1	1	0	0	0	1	0	1	0	0
		-0.893345	1	0	0	0	0	0	1	0	1	1	1	1	1	1	1	0	0	0	0		1	0	1	1	0	0	1	0	1	1	1	1	0	0	1	1	1	1	0
		-0.846093	1	0	0	0	0	0	0	1	0	0	0	0	0	0	0	0	1	0	0		0	0	0	0	0	0	1	1	1	1	1	0	0	0	0	0	0	1	1
		-0.790297	0	0	1	0	0	1	1	0	1	1	0	0	0	0	0	0	0	0	0		0	1	1	1	1	0	0	1	0	1	1	0	1	0	1	1	1	0	0
		-0.726521	0	0	1	1	0	0	0	0	0	0	1	0	0	0	1	0	0	0	0		1	1	0	1	1	1	1	0	0	0	0	1	1	1	1	1	0	1	1
		-0.655408	0	0	0	0	1	0	0	0	0	0	0	1	0	1	0	1	0	0	1		1	0	1	0	1	1	1	1	1	0	0	1	1	1	1	1	1	1	1
		-0.577678	0	1	0	0	0	1	0	1	0	0	0	0	0	1	0	0	1	1	1		0	0	1	0	0	1	0	1	1	1	1	0	0	0	0	1	1	1	0
		-0.494113	0	1	0	0	1	0	0	0	1	0	0	0	1	0	0	0	1	0	1		1	1	0	1	0	0	1	1	1	1	1	1	1	1	1	0	0	0	1
		-0.40556	1	0	1	0	0	0	1	1	0	0	1	0	1	0	0	1	0	1	0		0	1	1	1	1	1	0	0	1	1	1	1	0	1	1	0	1	0	1
		-0.312911	0	1	0	0	0	1	0	1	1	0	1	1	1	0	0	1	0	0	0		1	1	1	1	1	0	1	0	0	0	0	0	1	1	0	1	1	1	0
		-0.217102	1	0	1	1	0	0	1	0	0	1	0	0	0	1	1	0	0	0	0		1	1	1	1	1	1	1	1	1	1	1	1	1	1	1	1	1	0	1
		-0.119101	0	0	0	0	1	1	0	0	1	0	0	0	0	0	1	0	0	1	1		1	0	0	0	1	1	1	1	1	1	1	0	0	0	1	1	1	1	1
		-0.019897	0	0	0	1	0	0	0	1	1	1	0	0	0	0	1	0	1	1	0		0	1	1	1	0	1	1	1	1	1	1	1	1	1	0	0	0	1	1
		0.0795077	0	1	0	1	0	0	0	0	0	0	0	0	1	1	0	0	1	0	0		1	0	1	1	1	0	0	0	0	0	1	1	1	1	1	1	1	0	0
		0.17811	0	1	0	1	1	0	1	1	0	1	1	0	1	0	0	1	0	0	1		1	1	1	1	1	1	1	1	1	1	0	1	1	1	1	1	1	1	1
		0.274913	0	0	1	0	0	1	1	0	0	0	1	1	0	0	1	0	0	1	1		1	1	1	1	1	1	1	1	1	0	1	1	1	1	1	1	0	1	1
		0.36894	1	0	1	0	1	0	0	0	0	0	1	0	0	1	0	0	0	0	0		0	0	0	0	0	1	1	1	1	1	1	0	0	0	0	1	1	1	1
		0.459242	1	1	0	1	0	0	0	1	0	0	0	0	0	0	1	1	1	1	1		1	1	1	1	1	0	1	1	1	1	1	1	1	1	1	0	0	1	1
		0.544906	0	1	0	1	1	0	1	0	0	1	1	1	1	0	0	1	0	1	1		1	1	1	1	1	1	0	0	0	1	1	1	1	1	1	1	1	0	0
		0.625068	0	0	1	0	0	1	0	1	1	0	0	0	0	0	1	0	0	0	0		1	1	1	1	1	1	1	1	0	0	0	1	1	1	1	1	1	1	1
		0.698917	1	0	0	0	0	0	1	0	0	1	0	0	0	0	1	0	1	0	0		1	1	0	0	0	1	1	1	1	1	1	0	1	0	1	1	1	1	1
		0.76571	0	0	1	0	0	0	0	0	1	0	0	1	1	1	0	0	1	0	1		0	0	0	1	1	1	1	1	1	1	1	1	0	0	0	0	0	1	1
		0.824769	0	1	0	1	0	1	0	0	0	0	1	0	0	1	0	1	0	1	0		1	1	1	0	0	0	0	1	1	1	1	1	1	1	1	1	1	0	0
		0.8755	1	0	1	1	0	0	0	0	0	1	0	0	0	0	0	0	1	0	1		1	1	1	1	0	1	1	0	0	0	0	1	1	1	0	0	1	1	1
		0.917392	0	0	1	0	1	1	1	0	1	1	1	0	0	1	0	0	0	0	0		1	1	1	1	1	1	0	1	1	1	1	0	1	1	1	1	0	1	1
		0.95003	0	1	0	0	0	0	0	0	0	1	0	1	0	1	1	0	0	1	0		0	1	0	1	1	1	1	0	1	1	1	0	0	0	0	1	1	0	0
		0.973104	0	0	0	1	1	0	0	1	0	0	1	0	0	0	0	0	1	0	1		0	0	0	0	0	0	0	1	0	1	0	0	0	0	1	0	0	1	1
		0.986406	0	1	0	0	1	0	0	1	0	0	0	0	0	0	0	0	0	0	0		1	0	1	1	1	1	0	1	1	0	1	1	1	1	1	1	1	1	0
		0.989821	1	0	1	0	0	0	1	1	0	0	0	1	0	0	1	1	0	0	1		1	0	0	1	0	0	1	0	0	0	0	1	1	1	0	0	1	0	1
		0.983222	1	0	0	0	0	0	0	0	1	0	0	0	0	0	0	0	0	1	0		1	1	1	0	1	0	1	1	1	1	0	1	0	0	0	0	0	1	1
		0.966179	0	0	0	0	1	1	1	0	1	0	0	0	1	1	0	1	0	1	0		0	0	0	0	0	0	1	0	0	0	0	0	0	0	0	0	1	1	0
		0.937218	0	0	0	0	0	1	0	0	0	0	1	0	1	0	1	1	0	0	0		0	1	1	0	1	0	0	0	0	0	1	0	1	1	1	0	0	0	0
		0.892472	0	0	0	1	0	0	0	0	0	0	0	0	1	0	1	0	0	0	0		0	0	0	0	0	1	0	0	0	0	0	0	0	1	1	0	0	0	0
		0.823742	0	0	0	0	0	0	0	0	0	0	1	0	0	0	0	0	0	1	0		0	0	0	0	0	0	0	0	0	0	0	0	0	0	0	0	0	0	0
		0.716312	0	0	1	0	0	0	0	0	1	0	0	0	0	0	0	0	0	0	1		0	0	0	0	0	0	0	0	0	0	0	0	0	0	0	0	0	0	0
		0.548145	0	0	0	0	0	0	0	0	0	0	0	0	1	0	0	0	1	0	0		0	0	0	0	0	0	0	0	0	0	0	0	0	0	0	0	0	0	0
		0.295222	0	0	0	0	0	0	0	0	0	0	0	0	0	0	0	0	0	0	0		0	0	0	0	0	0	0	0	0	0	0	0	0	0	0	0	0	0	0
		-0.0496957	0	0	0	0	0	0	0	0	0	0	0	0	0	0	0	1	0	0	0		0	0	0	0	0	0	0	0	0	0	0	0	0	0	0	0	0	0	0
		-0.446781	0	0	0	0	0	0	0	1	0	0	0	0	0	0	0	0	0	0	0		0	0	0	0	0	0	0	0	0	0	0	0	0	0	0	0	0	0	0
		-0.796259	0	0	0	0	0	0	0	0	0	0	0	0	0	0	0	0	0	0	0		0	0	0	0	0	0	0	0	0	0	0	0	0	0	0	1	0	0	0
		-0.982596	0	0	0	0	1	0	0	0	0	0	0	0	0	0	0	1	0	0	0		0	0	0	0	0	0	0	1	1	0	0	0	0	0	0	0	0	0	1
		-0.955987	0	0	0	0	0	0	0	0	0	0	0	0	0	0	0	0	0	0	0		0	1	0	1	1	0	0	1	1	1	1	1	1	0	0	1	1	0	0
		-0.764572	1	1	1	0	0	0	0	0	0	0	0	1	0	1	0	0	0	0	0		1	1	1	1	1	1	1	0	0	0	1	1	1	1	1	1	1	1	1
		-0.504085	0	0	0	0	0	0	1	1	0	0	0	0	0	1	1	0	0	0	1		1	1	1	1	1	1	1	1	1	1	0	1	1	1	1	1	1	1	1
		-0.251171	0	0	0	1	1	1	0	0	1	1	0	0	0	0	1	0	1	1	0		1	1	1	1	1	1	1	1	1	1	1	1	1	1	1	1	1	1	1
		-0.0395362	1	1	0	0	1	0	0	0	1	0	1	1	0	1	0	0	1	0	0		0	0	0	0	0	1	1	1	1	1	1	0	0	0	0	1	0	1	1
		0.12821	0	1	1	0	0	0	1	0	0	0	1	1	0	0	0	1	0	1	0		1	1	1	1	1	0	1	1	1	1	1	1	1	1	1	0	1	0	0
		0.262062	0	0	0	1	0	1	0	0	0	0	1	1	1	1	1	1	0	0	1		1	1	1	1	1	1	0	0	0	0	1	1	1	1	1	1	1	1	1
		0.373297	0	0	0	0	1	0	1	1	1	1	0	0	1	1	0	0	1	1	0		1	1	1	1	1	1	1	1	1	1	0	1	1	1	1	1	1	1	1
		0.470218	1	0	1	1	1	1	0	1	1	0	0	0	0	0	1	0	0	0	0		1	0	1	1	1	1	1	1	1	1	1	0	0	1	1	1	1	1	1
		0.557588	1	1	0	1	0	0	0	0	0	0	1	1	1	0	0	0	1	0	1		0	1	0	0	0	1	1	1	1	1	1	1	1	0	0	0	0	1	1
		0.637469	1	0	1	0	0	1	1	0	0	1	1	0	1	1	1	1	0	1	1		1	1	1	1	1	0	0	1	1	1	1	1	1	1	1	1	1	0	0
		0.71032	0	1	0	0	1	0	0	1	1	0	0	0	0	0	0	0	0	0	0		1	1	1	1	1	1	1	0	0	0	0	1	1	1	1	1	1	1	1
		0.775868	0	0	1	1	0	0	0	1	0	1	0	0	0	1	0	1	1	1	1		1	1	1	1	1	1	1	0	1	1	1	1	1	1	1	1	1	1	0
		0.83358	1	0	0	0	1	0	1	0	1	0	0	1	1	0	1	1	0	1	0		0	0	0	0	0	1	1	1	1	1	1	0	0	0	0	0	0	1	1
		0.882891	1	0	1	1	0	0	0	0	0	1	1	0	0	0	0	0	1	1	1		1	1	1	1	1	0	1	1	1	1	1	1	1	1	1	1	1	1	1
		0.923302	0	1	0	0	0	0	0	1	1	0	0	1	0	1	1	1	0	0	0		1	1	1	1	0	1	0	0	0	1	1	1	1	0	1	1	1	0	0
		0.954397	0	0	0	0	1	1	1	0	0	1	1	0	1	0	0	0	1	0	1		1	1	1	1	1	1	1	1	1	0	0	1	0	0	1	1	0	1	1
		0.975857	1	1	0	0	0	0	0	1	0	0	0	0	1	0	0	0	0	0	0		0	0	0	0	1	1	1	0	0	1	1	0	1	1	1	0	1	1	1
		0.987462	0	1	0	1	0	1	0	0	0	0	1	0	1	0	0	1	0	0	0		0	1	0	0	0	0	1	1	1	1	0	0	0	0	0	0	0	0	0
		0.989097	0	0	0	0	0	0	0	1	0	0	0	0	0	0	0	0	1	0	0		1	0	1	1	1	0	0	1	0	0	1	0	1	1	0	0	1	0	0
		0.980743	0	0	0	1	1	0	1	0	1	1	0	0	1	0	1	1	0	1	0		1	1	1	1	0	1	1	0	0	0	1	1	0	1	0	0	1	1	1
		0.962486	0	0	1	0	0	1	0	1	0	1	0	0	0	1	1	0	1	1	0		1	1	1	0	1	1	0	1	0	1	0	1	0	1	1	1	0	0	1
		0.93451	0	0	0	0	1	1	0	0	1	0	0	1	0	0	0	1	0	0	1		0	0	0	0	0	1	0	0	1	0	0	0	0	0	0	1	0	0	0
		0.897097	1	1	0	0	0	0	0	0	0	0	0	0	0	1	0	0	0	0	0		1	0	0	0	0	0	0	1	1	1	0	1	1	0	1	0	1	1	1
		0.850625	1	0	1	0	0	0	0	0	0	0	0	0	0	0	0	0	0	0	0		0	0	0	1	0	0	0	0	0	0	0	0	1	1	0	1	0	0	0
		0.795564	0	1	1	1	0	0	0	0	0	0	0	0	1	0	0	0	0	0	1		0	1	0	0	0	0	1	1	1	0	0	0	0	1	0	1	0	1	0
		0.732469	0	0	0	0	0	0	0	1	1	0	1	1	1	0	0	0	0	0	0		0	0	1	0	1	1	0	0	0	0	0	0	0	0	0	0	0	0	1
		0.661978	0	0	0	0	0	0	1	0	0	0	1	0	0	0	0	0	1	1	0		0	0	0	0	0	0	1	0	0	0	1	1	0	0	0	0	0	0	0
		0.584802	0	0	0	0	0	0	0	0	0	0	0	0	0	0	0	1	0	0	0		0	0	0	1	1	0	0	0	0	1	0	0	0	0	1	0	1	0	0
		0.50172	0	0	0	0	0	0	1	0	0	0	0	1	0	1	0	0	0	0	1		1	0	0	0	0	1	0	0	0	0	0	0	0	0	1	0	0	0	0
		0.413573	0	0	0	0	1	0	0	0	0	0	0	0	0	0	0	0	0	0	0		0	0	0	1	0	0	0	0	0	0	1	0	1	0	1	0	0	0	0
		0.321249	0	0	0	0	0	0	0	0	0	1	0	0	0	1	0	0	0	0	0		0	0	1	0	0	0	0	0	1	0	0	0	0	0	0	0	0	0	0
		0.225681	1	0	0	0	0	0	0	0	0	0	0	0	0	0	1	0	0	0	0		0	0	0	0	0	0	1	0	1	1	1	1	0	0	0	0	0	0	0
		0.127834	0	0	0	0	0	1	1	0	0	0	1	1	0	0	0	0	0	1	0		0	1	0	0	0	0	0	0	0	0	0	1	1	0	0	0	1	0	0
		0.0286966	0	0	1	0	0	0	0	0	0	0	1	0	0	0	0	0	0	0	0		1	1	1	0	1	1	1	1	0	0	0	0	1	1	0	1	0	0	0
		-0.0707308	0	0	0	0	0	0	0	0	0	0	0	0	1	0	0	1	0	1	0		0	0	0	0	0	0	0	1	0	0	0	0	0	0	0	0	0	1	1
		-0.169444	0	0	1	1	0	0	0	0	0	1	0	0	0	0	0	0	0	0	0		0	0	0	0	0	0	0	0	0	0	0	0	0	0	0	0	0	1	1
		-0.266446	0	0	0	0	0	0	0	0	0	0	0	0	0	0	0	0	0	0	0		1	0	0	0	0	0	0	0	0	0	0	0	0	1	0	0	0	0	0
		-0.360758	0	0	0	0	1	0	0	0	0	0	0	0	0	0	1	0	0	0	1		0	0	0	0	0	0	0	0	0	0	0	0	0	0	0	0	0	0	0
		-0.451426	0	0	0	1	0	0	0	1	0	0	0	0	1	0	1	0	1	0	0		0	0	0	0	0	0	0	0	0	0	0	0	0	0	0	0	0	0	0
		-0.537537	1	1	0	0	0	0	0	0	1	0	0	0	0	0	0	0	1	0	0		0	0	0	0	0	0	0	0	0	0	0	0	0	0	1	0	0	0	0
		-0.618219	1	1	0	0	0	0	0	0	0	0	0	0	0	0	0	0	0	0	0		0	0	0	0	0	0	0	0	0	1	0	0	0	0	0	0	0	0	0
		-0.692658	0	0	0	0	0	1	0	1	0	0	0	1	0	0	0	1	0	0	0		0	0	0	0	1	0	0	0	1	1	1	0	0	0	1	0	1	0	0
		-0.760103	0	0	0	0	0	0	0	0	1	1	0	0	0	0	0	0	0	0	0		0	0	1	1	1	0	0	0	0	0	1	0	0	0	0	1	1	0	0
		-0.819873	0	0	0	0	0	0	0	0	0	0	0	0	0	0	0	0	0	0	0		1	0	1	1	0	0	0	1	0	0	0	0	0	0	0	0	1	0	1
		-0.871363	0	0	0	1	0	0	0	0	0	0	1	0	0	0	0	0	0	0	0		0	1	0	1	0	0	1	1	1	0	0	0	0	0	0	0	0	1	1
		-0.914054	0	0	0	0	0	0	0	0	0	0	0	1	0	0	0	0	0	0	0		1	0	0	0	0	1	1	0	0	0	0	1	1	0	1	1	0	0	1
		-0.947516	0	0	0	0	0	0	0	0	1	0	0	0	0	0	0	0	0	0	1		0	1	0	0	0	0	1	0	1	0	1	1	1	1	0	0	0	1	0
		-0.971409	0	0	0	0	1	0	0	0	0	0	0	0	1	1	0	0	0	0	0		0	1	0	0	0	1	0	0	0	0	0	0	1	1	0	1	0	0	0
		-0.985493	0	1	0	0	1	1	1	0	0	0	0	0	0	1	0	0	0	1	1		0	0	0	0	0	1	0	0	0	0	1	1	0	0	0	1	0	0	0
		-0.989626	0	0	0	0	0	0	1	0	0	0	0	0	0	0	0	0	1	0	0		0	0	0	0	0	0	0	0	0	0	0	0	0	1	1	0	0	1	0
		-0.983765	0	0	1	0	0	1	0	0	1	1	0	0	0	0	0	0	1	0	0		0	0	1	0	1	0	0	1	0	1	0	1	0	0	0	1	0	1	0
		-0.967971	0	0	1	0	0	0	0	0	0	0	1	0	0	0	1	1	0	0	0		1	1	1	1	1	0	0	1	1	1	0	1	0	1	1	0	1	0	0
		-0.942402	0	0	0	0	0	0	1	1	0	1	0	0	0	1	1	0	0	1	0		1	1	1	1	1	1	1	0	0	1	0	1	1	0	0	0	1	1	0
		-0.907316	0	1	0	1	0	0	0	1	0	1	0	0	1	0	0	0	0	1	0		1	0	1	1	1	1	1	1	1	0	0	0	1	1	0	1	1	0	1
		-0.863068	1	0	0	0	0	0	0	0	0	0	0	1	0	0	0	1	0	0	1		1	1	1	0	1	1	1	0	1	1	1	0	0	1	1	0	1	0	1
		-0.810106	1	0	0	1	0	0	1	0	0	0	0	1	1	0	0	0	1	0	1		0	0	0	0	0	1	0	1	1	1	1	0	1	0	0	1	0	0	1
		-0.748963	0	0	0	0	1	1	0	0	0	1	0	0	0	0	1	1	0	0	0		1	1	0	0	0	0	0	1	1	1	1	1	1	1	1	0	1	0	1
		-0.680256	0	1	1	0	0	0	0	1	1	0	1	0	0	0	0	0	1	1	0		0	1	1	1	1	0	0	0	0	0	1	1	1	0	1	1	0	0	0
		-0.604681	1	0	0	0	1	1	0	0	1	0	0	0	0	1	0	0	1	0	0		0	1	1	1	1	1	1	1	0	1	0	1	0	0	0	1	0	1	1
		-0.522999	0	1	1	1	0	0	0	1	1	0	1	0	0	0	1	1	0	0	0		0	1	0	1	1	1	1	1	1	1	1	0	0	1	1	0	1	1	0
		-0.436037	1	0	0	0	1	0	0	1	0	0	1	1	1	0	0	1	0	0	0		1	0	1	0	0	1	1	0	0	1	1	1	1	0	0	0	0	1	1
		-0.344671	0	1	0	0	0	0	0	0	0	0	1	1	0	0	1	0	0	1	1		1	0	1	1	1	0	0	1	1	1	1	1	1	1	1	1	1	1	0
		-0.249825	0	0	1	0	1	0	0	0	1	0	0	0	0	1	0	0	1	0	1		1	1	1	1	0	0	1	0	1	0	0	0	1	1	1	1	1	0	1
		-0.152456	1	1	0	1	0	1	1	0	0	1	0	0	0	1	1	0	0	1	0		1	1	1	1	1	1	1	1	0	1	0	1	1	1	1	1	1	1	1
		-0.0535474	0	0	1	1	0	0	1	1	0	0	1	1	0	0	0	1	1	1	1		1	1	0	1	1	1	1	1	1	0	1	0	0	1	1	1	1	1	1
		0.0459018	1	0	0	0	0	0	1	0	0	0	0	0	0	1	1	0	0	0	0		0	0	1	0	0	1	1	1	1	1	1	1	1	0	0	0	0	1	1
		0.144887	0	1	1	0	1	1	1	0	1	1	0	0	0	1	0	0	0	0	0		1	1	1	1	1	0	0	1	1	1	1	1	0	1	1	1	1	0	0
		0.24241	0	0	1	1	1	1	0	0	1	0	0	1	1	0	0	1	1	1	0		1	1	1	1	1	1	1	0	0	1	1	1	1	1	1	1	1	1	1
		0.337485	0	0	0	0	0	0	0	0	0	0	0	1	0	1	0	0	0	1	0		1	1	1	1	1	1	1	1	1	0	0	1	1	1	0	1	1	1	1
		0.429152	1	0	0	0	0	1	0	1	0	1	0	0	1	0	1	1	0	0	1		1	0	0	0	0	1	1	1	1	1	1	0	0	0	1	1	1	1	1
		0.516485	1	0	0	0	1	0	1	0	1	0	0	1	0	0	1	0	1	0	1		0	1	0	1	1	1	1	1	1	1	1	1	1	1	0	0	0	1	1
		0.598603	0	1	1	1	0	0	1	0	0	1	0	0	1	0	0	0	0	0	1		1	1	1	1	1	0	0	0	0	0	1	1	1	1	1	1	1	0	0
		0.674676	0	1	0	0	1	1	0	1	1	0	1	1	1	0	1	1	1	1	1		1	1	1	1	1	1	0	1	1	0	0	0	1	0	1	0	1	1	1
		0.743936	0	0	1	1	0	1	0	1	0	0	1	0	1	0	1	1	0	0	0		1	1	1	1	1	1	1	1	1	1	1	1	1	1	1	1	1	1	1
		0.805684	1	0	0	1	1	0	0	0	0	0	1	0	0	1	0	1	1	0	1		0	0	0	0	0	1	1	1	1	1	0	0	0	0	0	1	1	1	1
		0.859297	0	1	1	0	0	1	0	0	1	0	0	0	0	1	1	0	0	1	0		1	1	1	1	0	0	1	0	1	1	1	1	1	1	1	0	0	1	1
		0.904232	0	0	0	0	0	1	1	1	0	0	0	0	1	0	0	0	0	0	0		1	0	1	1	1	1	0	0	0	1	1	1	0	1	1	1	1	0	0
		0.940036	1	1	0	1	0	0	0	0	1	0	0	1	0	1	0	0	1	0	0		1	1	0	1	1	0	1	1	0	0	0	1	1	1	1	1	1	1	1
		0.966348	0	0	0	0	0	0	1	1	0	1	1	0	1	0	0	0	0	1	1		0	0	1	0	1	1	1	1	1	1	0	0	0	1	0	1	1	1	1
		0.982901	0	1	0	0	1	0	0	0	0	1	0	0	0	0	1	1	0	0	0		0	1	0	0	0	1	0	1	1	1	1	1	1	0	0	0	0	0	0
		0.98953	0	0	0	0	0	1	0	0	0	0	0	1	0	1	0	1	0	0	1		1	0	1	0	1	0	1	1	0	1	1	0	1	0	1	0	1	0	0
		0.986166	0	0	1	0	0	0	0	1	0	1	1	0	1	0	0	0	0	1	0		0	0	1	1	0	1	0	0	0	0	0	1	1	1	0	1	0	0	0
		0.972844	1	0	0	0	0	1	1	0	0	0	1	0	0	0	0	0	1	0	0		1	0	0	0	0	0	1	0	1	0	1	1	0	1	1	1	0	1	1
		0.949698	1	0	0	1	1	0	1	0	0	0	0	1	0	0	0	0	0	0	1		0	0	0	0	1	0	1	1	0	0	1	0	0	0	1	0	0	1	1
		0.916962	0	1	0	0	0	1	0	0	0	0	0	1	0	1	1	0	0	1	0		1	1	1	1	0	0	1	0	1	1	0	1	0	0	0	1	0	1	0
		0.874966	0	0	0	1	0	0	0	0	1	0	0	0	0	0	1	0	0	0	0		0	1	0	0	1	1	0	1	0	1	0	0	1	0	0	0	1	0	0

## Sheet: Figure2_supplement_Fig1_A_64Hz
		chirp phase 1
		Stimulus	Neuron 1																				Neuron 2
			Trial 1	Trial 2	Trial 3	Trial 4	Trial 5	Trial 6	Trial 7	Trial 8	Trial 9	Trial 10	Trial 11	Trial 12	Trial 13	Trial 14	Trial 15	Trial 16	Trial 17	Trial 18	Trial 19		Trial 1	Trial 2	Trial 3	Trial 4	Trial 5	Trial 6	Trial 7	Trial 8	Trial 9	Trial 10	Trial 11	Trial 12	Trial 13	Trial 14	Trial 15	Trial 16	Trial 17	Trial 18	Trial 19
		-0.566724	0	0	1	1	0	1	1	1	1	1	0	1	0	1	0	1	1	1	0		0	1	1	1	1	1	1	1	1	1	1	1	0	1	0	0	1	1	0
		-0.199518	0	1	1	1	1	1	1	0	1	1	1	1	1	1	0	1	1	1	1		1	0	0	0	0	0	1	1	0	0	0	0	1	1	1	1	1	1	0
		0.199519	1	1	1	1	1	1	1	0	0	1	1	1	1	1	1	1	1	0	1		0	1	1	1	1	1	0	0	1	1	1	1	0	0	0	0	0	0	0
		0.566728	1	1	0	0	1	0	1	1	1	1	1	1	1	0	1	1	0	1	1		1	1	1	1	1	1	1	1	1	1	1	1	1	1	1	1	1	1	1
		0.843525	1	0	1	1	0	0	0	1	1	0	1	1	0	1	1	1	1	1	1		1	1	1	1	1	1	1	1	1	1	1	1	1	1	1	1	1	1	1
		0.985757	1	1	0	1	0	1	1	1	1	1	1	1	0	1	1	1	0	1	0		1	0	0	0	0	0	1	1	0	0	0	0	1	1	1	1	0	0	1
		0.970721	1	1	1	0	1	0	1	1	0	1	1	0	0	1	1	0	1	0	1		0	1	1	1	0	1	0	0	1	1	1	0	0	0	0	0	0	1	1
		0.800786	1	0	1	0	0	1	0	1	0	0	0	0	1	0	1	0	1	0	1		1	0	1	0	0	0	1	1	0	0	0	1	1	0	1	1	0	0	0
		0.502934	0	1	0	0	1	0	0	0	1	0	0	0	1	0	0	0	0	0	0		1	0	0	0	0	0	0	0	0	0	0	0	1	0	1	0	0	0	1
		0.124398	0	0	0	0	0	0	0	0	0	0	0	0	0	0	0	1	0	0	0		0	0	0	0	0	0	0	0	0	0	0	0	0	0	0	0	0	0	0
		-0.274925	0	0	0	0	0	0	0	0	0	0	0	0	0	0	0	0	0	0	0		0	0	0	0	0	0	0	0	0	0	0	0	0	0	0	0	0	0	1
		-0.631741	0	0	0	0	0	0	0	0	0	0	0	0	0	0	0	0	0	0	0		0	0	0	0	0	0	0	0	0	0	0	0	0	0	0	0	0	0	0
		-0.888051	0	0	0	0	0	0	0	0	0	0	0	0	0	0	0	0	0	0	0		0	0	0	0	0	0	0	0	0	0	0	0	0	0	0	0	0	0	0
		-0.99757	0	0	0	1	0	0	0	0	0	0	0	0	0	0	0	0	0	0	0		0	0	0	1	0	0	0	0	0	0	0	0	0	0	0	0	0	0	0
		-0.928638	0	0	0	1	0	0	0	0	0	0	0	0	0	0	0	0	0	0	0		0	1	0	0	0	0	0	0	0	0	0	0	0	0	0	0	0	1	0
		-0.666283	0	1	1	1	1	1	1	0	0	1	1	1	0	1	1	1	1	0	1		0	1	1	1	1	1	1	0	1	1	1	1	0	1	1	1	1	1	0
		-0.222769	1	1	1	1	1	1	1	1	1	1	1	1	1	1	1	1	1	1	1		1	1	1	1	1	1	1	1	1	1	1	1	1	1	1	1	1	1	1
		0.330862	1	1	1	1	1	1	1	1	1	1	1	1	1	1	1	1	1	1	1		1	0	1	0	0	0	1	1	1	0	0	0	1	1	1	1	1	0	1
		0.822207	1	1	1	0	0	1	1	1	0	1	1	1	1	1	1	0	1	1	1		0	1	0	1	1	1	0	0	0	1	1	1	0	0	0	0	0	1	0
		0.992948	1	0	0	0	1	1	1	1	1	1	1	0	1	1	0	1	0	1	0		1	1	1	0	1	0	1	1	1	1	1	1	1	1	1	1	1	0	1
		0.660875	0	1	0	0	0	0	0	0	1	0	0	1	0	1	1	1	0	1	1		1	0	0	0	0	0	0	0	0	0	0	0	1	0	0	0	0	0	0
		-0.0516703	0	0	0	0	0	0	0	0	0	0	0	0	0	0	0	0	0	0	0		0	0	0	0	0	0	0	0	0	0	0	0	0	0	0	0	0	0	0
		-0.728743	0	0	0	0	0	0	0	0	0	0	0	0	0	0	0	0	0	1	0		0	0	0	0	0	0	0	0	0	0	0	0	0	0	0	0	0	0	0
		-0.997135	0	0	0	0	0	0	0	1	0	0	0	0	0	0	0	0	0	0	0		0	0	0	0	0	1	0	0	0	0	0	1	0	0	0	0	0	0	0
		-0.799612	0	0	0	0	0	0	0	0	0	1	0	1	1	0	0	0	1	0	0		1	1	1	1	1	1	1	1	1	1	0	1	0	0	0	0	1	0	0
		-0.326788	1	1	1	1	1	1	1	0	0	1	1	1	1	0	1	0	1	0	0		0	0	0	0	0	0	1	1	0	0	1	0	0	1	0	0	1	0	1
		0.197313	1	1	1	1	1	1	1	1	1	1	1	1	1	1	1	1	1	1	1		1	1	1	1	1	1	0	0	1	1	1	1	0	0	1	1	0	1	1
		0.628931	1	1	0	1	1	1	1	1	1	1	1	0	1	1	1	1	0	1	1		1	1	1	1	1	1	1	1	1	1	1	1	1	1	1	1	1	1	0
		0.903033	1	1	0	0	1	0	1	1	0	1	1	1	0	1	1	1	1	1	1		0	1	1	1	1	1	1	1	1	1	1	0	1	1	1	1	1	1	1
		0.999321	1	1	1	1	1	1	0	1	0	1	1	0	1	1	0	0	1	1	1		1	0	0	0	0	0	1	1	0	0	0	0	1	1	1	1	0	0	1
		0.921797	0	0	1	0	0	1	1	0	1	0	1	0	1	0	0	1	0	0	1		0	1	0	1	1	0	0	0	0	1	1	1	0	0	0	0	1	1	0
		0.693218	0	1	0	1	0	0	1	1	1	0	0	0	0	0	0	0	0	0	0		0	0	0	0	0	0	1	1	0	1	0	0	1	1	1	1	0	0	1
		0.354041	0	0	0	0	0	0	0	0	0	0	0	0	0	0	0	0	0	0	0		0	0	0	0	0	0	0	0	0	0	0	0	1	0	0	0	0	0	0
		-0.0408019	1	0	0	0	0	0	0	0	0	1	0	0	0	0	1	0	1	0	0		0	0	0	0	0	0	0	0	0	0	0	0	0	0	0	0	0	0	0
		-0.428557	0	0	0	0	0	0	0	0	0	0	0	0	0	0	0	0	0	0	0		0	0	0	0	0	0	0	0	0	0	0	0	0	0	0	0	0	0	0
		-0.747655	0	0	0	0	0	0	0	0	0	0	0	0	0	0	0	0	0	0	0		0	0	0	0	0	0	0	0	0	0	0	0	0	0	0	0	0	0	0
		-0.947375	0	0	0	0	0	0	0	0	0	0	0	0	0	0	0	0	0	0	0		0	0	0	0	0	0	0	0	0	0	0	0	0	0	0	0	0	0	0
		-0.99593	0	0	1	1	0	0	0	0	0	0	0	0	0	0	0	0	0	0	0		0	0	0	0	0	0	0	0	0	0	0	0	0	0	0	0	0	0	0
		-0.885596	0	0	0	0	1	0	0	0	0	0	0	0	0	0	1	0	0	0	0		0	0	0	1	0	1	0	0	0	0	0	0	0	0	0	0	0	0	0
		chirp phase 2
		Stimulus	Neuron 1																				Neuron 2
			Trial 1	Trial 2	Trial 3	Trial 4	Trial 5	Trial 6	Trial 7	Trial 8	Trial 9	Trial 10	Trial 11	Trial 12	Trial 13	Trial 14	Trial 15	Trial 16	Trial 17	Trial 18	Trial 19		Trial 1	Trial 2	Trial 3	Trial 4	Trial 5	Trial 6	Trial 7	Trial 8	Trial 9	Trial 10	Trial 11	Trial 12	Trial 13	Trial 14	Trial 15	Trial 16	Trial 17	Trial 18	Trial 19
		0.436696	1	1	1	1	1	1	1	1	0	1	1	0	1	1	1	1	1	0	1		1	1	1	1	1	1	0	1	0	1	0	1	0	1	1	1	1	1	1
		0.753527	1	1	1	1	1	1	1	1	1	1	1	1	1	1	1	1	1	1	1		0	0	0	0	0	1	1	1	1	1	1	1	1	1	1	1	1	1	1
		0.950146	1	1	0	1	1	1	1	1	1	1	1	1	1	1	1	1	1	1	1		1	1	1	1	1	1	1	1	1	1	1	1	1	1	1	1	1	1	1
		0.995181	1	0	0	0	1	1	1	0	1	0	0	1	0	1	0	1	0	0	0		1	1	1	1	1	1	0	0	1	1	1	0	0	0	1	0	0	0	0
		0.88145	1	0	1	0	1	1	1	0	0	0	0	1	0	0	0	0	0	0	0		0	0	0	0	0	0	1	1	0	0	0	1	1	1	0	1	1	1	1
		0.627084	0	0	1	0	0	0	1	1	1	0	1	1	0	1	1	1	0	0	1		1	0	1	1	1	0	0	0	1	1	1	0	0	0	1	0	0	1	0
		0.272638	1	1	1	1	1	0	1	0	0	1	1	0	1	0	1	0	1	1	1		0	0	1	1	0	0	0	0	0	0	0	0	0	0	0	0	0	0	0
		-0.125417	0	1	1	0	0	0	0	1	1	1	0	0	1	0	0	1	1	1	0		0	0	0	0	0	0	0	0	0	0	0	0	0	0	0	0	0	0	0
		-0.503691	0	0	0	1	0	0	0	0	1	0	0	0	0	0	0	0	0	0	0		0	0	0	0	0	0	0	0	0	0	0	0	0	0	0	0	0	0	0
		-0.801881	0	0	0	0	0	0	0	0	0	0	0	1	0	0	0	0	0	0	0		0	0	0	0	0	0	0	0	0	0	0	0	0	0	0	0	0	0	0
		-0.972002	0	0	0	0	0	0	0	0	0	0	0	1	0	0	0	0	0	0	0		0	0	0	0	0	0	0	0	0	0	0	0	0	0	0	0	0	0	0
		-0.984859	0	0	0	0	0	0	0	0	0	0	0	0	0	0	0	0	0	0	0		0	0	0	0	0	0	0	0	0	0	0	0	0	0	0	0	0	0	0
		-0.833009	0	0	0	0	0	0	0	0	0	0	0	0	0	0	0	0	0	0	0		0	0	0	0	0	0	0	0	0	0	0	0	0	0	0	0	0	0	0
		-0.530419	1	0	0	0	0	1	0	0	0	0	0	0	0	0	0	0	0	0	0		1	1	1	0	0	1	1	1	0	0	1	1	1	1	0	1	0	1	1
		-0.111937	1	0	0	0	1	1	0	0	0	0	0	0	0	1	0	0	0	0	0		1	1	1	1	1	1	1	1	1	1	0	1	1	1	1	1	0	1	1
		0.360876	1	0	0	0	1	0	0	1	0	0	1	0	0	1	1	0	0	1	0		1	1	1	1	1	1	1	1	1	1	1	1	0	0	1	1	1	0	0
		0.783099	1	1	0	1	1	0	1	1	0	1	1	1	1	1	1	1	1	1	1		0	0	1	1	0	0	0	0	0	0	1	0	1	1	0	0	1	1	1
		0.994736	0	1	1	1	1	1	1	1	1	1	1	1	1	1	1	1	1	1	1		1	1	0	0	1	1	1	1	1	1	1	1	1	1	1	1	1	1	1
		0.826561	1	1	1	1	0	1	1	0	1	1	1	1	1	1	1	0	1	1	1		0	1	1	1	1	1	1	0	1	1	0	0	0	0	1	1	1	0	0
		0.246626	1	1	1	0	1	1	1	1	1	1	1	1	1	1	1	1	1	1	1		0	0	0	0	0	0	0	0	0	0	0	0	0	0	0	0	0	0	0
		-0.493513	0	1	1	1	1	1	0	1	1	1	0	0	1	0	0	1	1	0	0		0	0	0	0	0	0	0	0	0	0	0	0	0	0	0	0	0	0	0
		-0.959564	0	0	0	0	0	0	1	0	1	0	1	0	0	0	1	1	0	0	1		0	0	0	0	0	0	0	0	0	0	0	0	0	1	0	0	0	0	0
		-0.888135	0	0	1	0	0	1	0	0	0	1	0	0	0	0	0	0	0	0	0		0	0	0	0	0	0	0	0	0	0	0	0	0	0	0	0	0	0	0
		-0.388372	0	0	0	0	0	0	0	0	0	0	0	0	0	0	0	0	0	0	0		1	1	0	1	1	1	0	0	0	0	1	0	1	1	0	0	0	0	0
		0.228312	1	0	0	0	0	0	0	0	0	0	0	0	0	0	0	0	0	0	0		1	0	1	1	0	0	0	1	0	1	0	1	1	1	0	0	1	1	1
		0.711655	1	0	0	0	0	0	1	1	0	0	0	1	0	0	0	1	1	1	1		0	1	0	0	1	1	1	1	1	1	1	1	1	1	1	1	1	1	1
		0.96169	1	1	1	1	1	1	1	1	1	1	1	1	1	1	1	0	1	1	1		1	1	1	1	1	1	1	1	1	1	1	1	1	1	1	1	1	1	1
		0.980265	1	1	1	1	1	1	1	1	1	1	1	1	1	1	1	1	1	1	1		1	1	1	1	1	1	1	0	1	0	1	0	0	0	0	1	0	0	0
		0.808943	0	1	1	1	1	1	1	1	1	1	1	0	1	1	1	1	1	1	0		0	0	1	0	0	0	0	1	0	0	0	1	1	1	1	0	1	1	0
		0.500797	1	1	1	0	1	1	1	0	1	1	1	0	1	1	1	0	0	1	0		1	1	0	0	1	0	1	0	1	1	0	1	0	0	0	0	0	1	0
		0.114673	0	0	0	1	1	1	0	1	0	0	0	1	1	1	0	1	1	0	0		0	0	0	0	0	0	0	0	0	0	0	0	0	0	0	0	0	0	0
		-0.286264	0	0	0	0	1	0	1	1	0	0	1	1	0	0	1	1	0	1	0		0	0	0	0	0	0	0	0	0	0	0	0	0	0	0	0	0	0	1
		-0.639141	0	0	0	1	0	0	0	0	0	0	0	0	0	0	0	0	0	0	0		0	0	0	0	0	0	0	0	0	0	0	0	0	0	0	0	0	0	0
		-0.888945	0	0	0	0	0	0	0	0	0	0	0	0	0	1	0	0	0	0	0		0	0	0	0	0	0	0	0	0	0	0	0	0	0	0	0	0	0	0
		-0.996534	0	0	0	0	0	0	0	0	0	0	0	0	0	0	0	0	0	0	0		0	0	0	0	0	0	0	0	0	0	0	0	0	0	0	0	0	0	0
		-0.94505	0	0	0	0	0	0	0	0	0	0	0	0	0	0	0	0	0	0	0		0	0	0	0	0	0	0	0	0	0	0	0	0	0	0	0	0	0	0
		-0.7428	0	0	0	0	0	0	0	0	0	0	0	0	0	0	0	0	0	0	1		0	0	0	0	0	0	0	0	0	0	0	0	0	0	0	0	0	0	0
		-0.422056	0	0	0	0	0	0	0	0	0	0	0	0	0	0	0	0	0	0	1		0	1	0	0	0	1	0	0	0	1	1	1	1	1	1	1	1	1	1
		-0.0339909	0	0	0	0	0	1	0	0	0	0	0	0	1	0	0	0	0	0	1		1	1	1	1	1	1	1	1	1	1	1	1	1	1	1	1	1	1	1
		chirp phase 3
		Stimulus	Neuron 1																				Neuron 2
			Trial 1	Trial 2	Trial 3	Trial 4	Trial 5	Trial 6	Trial 7	Trial 8	Trial 9	Trial 10	Trial 11	Trial 12	Trial 13	Trial 14	Trial 15	Trial 16	Trial 17	Trial 18	Trial 19		Trial 1	Trial 2	Trial 3	Trial 4	Trial 5	Trial 6	Trial 7	Trial 8	Trial 9	Trial 10	Trial 11	Trial 12	Trial 13	Trial 14	Trial 15	Trial 16	Trial 17	Trial 18	Trial 19
		0.950143	1	1	1	1	0	0	0	0	1	1	1	1	1	1	1	1	1	1	0		0	0	0	1	1	1	1	1	0	1	1	1	0	1	1	1	1	1	1
		0.995178	0	1	0	0	1	1	1	1	1	1	1	1	1	0	1	1	0	0	1		1	1	1	1	0	0	0	0	1	1	1	0	1	1	0	1	1	0	0
		0.881445	1	0	1	1	1	1	1	0	1	0	0	0	0	1	0	0	1	1	1		1	1	1	0	1	1	0	1	1	1	0	1	0	1	0	0	0	1	1
		0.627088	0	1	1	0	0	0	0	0	0	0	1	1	1	0	0	0	1	0	0		0	0	0	1	0	0	0	0	0	0	1	1	0	0	0	1	1	1	0
		0.272684	0	0	0	0	0	0	0	0	0	0	0	0	0	0	0	1	0	0	0		0	0	1	0	0	0	0	0	1	0	0	0	0	0	0	0	0	0	0
		-0.125241	0	0	0	0	0	0	0	0	0	0	0	0	0	0	0	0	0	0	0		0	0	0	0	0	0	0	0	0	0	0	0	0	0	0	0	0	0	0
		-0.503222	0	0	0	0	0	0	0	0	0	0	0	0	0	0	0	0	0	0	0		0	0	0	0	0	0	0	0	0	0	0	0	0	0	0	0	0	0	0
		-0.800995	0	0	0	0	0	0	0	0	0	0	0	0	0	0	0	0	0	0	0		0	0	0	0	0	0	0	0	0	0	0	0	0	0	0	0	0	0	0
		-0.97101	0	0	0	0	0	0	0	0	0	0	0	0	0	0	0	0	0	0	0		0	0	0	0	0	0	0	0	0	0	0	0	0	0	0	0	0	0	0
		-0.985836	0	0	0	0	0	0	0	1	0	0	0	0	0	0	0	0	0	0	0		0	0	0	0	0	0	0	0	0	0	0	0	0	0	0	0	0	0	0
		-0.842041	0	0	0	0	0	0	0	1	0	1	0	0	0	0	0	0	0	0	0		0	0	0	0	0	0	0	0	0	0	0	0	0	0	0	0	0	0	0
		-0.559923	0	0	0	0	0	1	0	1	0	0	0	0	0	0	0	1	0	1	1		0	0	0	0	0	0	0	0	0	0	0	0	0	0	1	0	0	0	0
		-0.180012	1	1	0	1	0	0	1	0	0	1	1	1	1	1	1	1	1	1	0		1	0	0	1	1	1	0	0	0	0	0	0	1	1	1	0	0	0	1
		0.24186	1	1	1	0	1	1	1	1	1	1	1	1	1	0	1	0	0	0	1		1	0	1	1	1	1	0	0	1	1	1	1	0	0	0	0	1	1	1
		0.636941	0	0	1	1	1	1	1	1	1	1	1	0	0	1	0	1	1	1	1		0	1	1	1	1	0	1	1	1	1	1	0	1	1	1	1	1	0	0
		0.920343	1	1	1	1	1	1	0	1	0	0	0	1	1	1	1	1	1	1	1		1	1	0	1	0	0	1	1	1	1	0	1	0	1	1	1	1	1	1
		0.988089	1	1	1	1	0	0	1	0	1	1	1	1	1	1	1	1	1	0	0		1	1	0	0	1	0	1	1	0	0	1	1	1	1	0	1	0	1	0
		0.741203	0	0	0	0	1	1	0	1	1	0	1	0	0	0	0	0	0	1	1		0	0	0	0	0	0	0	0	1	1	0	0	0	0	1	0	1	1	0
		0.171202	1	1	0	0	1	0	0	0	0	0	0	0	0	1	1	0	0	0	0		1	0	0	0	0	0	0	1	0	0	0	0	0	0	0	0	0	0	0
		-0.525276	0	0	0	0	0	0	0	0	0	0	0	0	0	0	0	0	0	0	0		0	0	0	0	0	0	0	0	0	0	0	0	0	0	0	0	0	0	0
		-0.967017	1	0	0	0	0	0	0	0	0	0	0	0	0	0	0	0	0	0	0		0	0	0	0	0	0	1	0	0	0	0	0	0	0	0	0	0	0	0
		-0.862638	0	0	0	0	0	0	0	0	0	0	0	1	0	0	0	0	0	0	0		0	0	0	0	0	1	1	0	0	0	0	0	0	0	0	0	0	0	1
		-0.288833	1	0	1	1	1	1	0	0	1	1	0	0	1	1	0	1	0	1	1		1	0	0	0	1	1	0	0	0	0	1	1	1	0	0	0	1	0	1
		0.392287	1	1	1	1	1	1	1	1	0	0	0	1	1	1	0	1	1	1	1		1	1	1	1	1	1	1	1	1	1	1	1	1	1	0	1	0	1	0
		0.857639	0	1	1	1	0	0	1	0	1	1	1	1	1	1	1	1	1	0	0		1	1	1	0	1	0	1	1	1	1	0	0	1	1	1	1	1	0	1
		0.997124	1	1	0	0	1	1	1	1	1	1	1	1	0	0	1	0	0	1	1		0	1	1	1	0	1	0	1	1	0	0	1	0	1	1	1	0	1	1
		0.859279	0	0	1	0	1	0	1	1	1	0	0	0	0	1	0	1	1	1	1		0	0	0	0	1	1	0	1	0	1	0	0	0	0	1	0	0	1	1
		0.542422	0	1	1	0	0	0	0	0	0	1	1	0	0	0	1	0	0	0	0		0	1	0	0	0	0	0	0	0	0	0	0	0	1	0	0	0	0	0
		0.138565	0	0	0	0	0	1	0	1	0	0	0	0	0	0	0	0	0	0	0		0	0	0	0	0	0	0	0	0	0	0	0	0	0	0	0	0	0	0
		-0.275734	0	0	0	0	0	0	0	0	0	0	0	0	0	0	0	0	0	0	0		0	0	0	0	0	0	0	0	0	0	0	0	0	0	0	0	0	0	0
		-0.635716	0	0	0	0	0	0	0	0	0	0	0	0	0	0	0	0	0	0	0		0	0	0	0	0	0	0	0	0	0	0	0	0	0	0	0	0	0	0
		-0.888319	0	0	0	0	0	0	0	0	0	0	0	0	0	0	0	0	0	0	0		0	0	0	0	0	0	0	0	0	0	0	0	0	0	0	0	0	0	0
		-0.996661	0	0	0	0	0	0	0	0	0	0	0	0	0	0	0	0	0	0	0		0	0	0	0	0	0	0	0	0	0	0	0	0	0	0	0	0	0	0
		-0.945245	0	0	0	0	0	0	0	0	0	0	0	0	0	0	0	0	0	0	0		0	0	0	0	0	0	0	0	0	0	0	0	0	0	0	0	0	0	0
		-0.742906	0	0	0	1	0	0	0	0	1	0	0	0	0	0	0	0	0	1	0		0	0	0	0	0	0	0	0	0	0	0	0	0	0	0	0	0	0	0
		-0.422099	1	0	1	1	0	0	0	1	0	1	0	1	1	1	1	1	1	1	1		0	0	0	0	0	0	1	0	0	0	1	1	1	0	0	0	0	1	0
		-0.0340037	1	0	0	1	0	1	1	0	1	1	1	1	1	1	1	1	1	0	0		0	0	0	1	1	0	1	0	0	1	1	1	0	0	0	1	1	1	0
		0.359492	0	1	1	0	1	1	1	1	1	1	1	1	1	0	1	0	0	1	1		1	1	1	1	0	1	0	0	0	1	1	0	1	1	1	1	1	0	0
		0.695625	1	0	1	1	1	1	1	1	1	1	1	0	0	1	0	1	1	1	1		1	1	1	1	1	1	1	1	1	1	0	1	1	1	1	1	0	1	1
		chirp phase 4
		Stimulus	Neuron 1																				Neuron 2
			Trial 1	Trial 2	Trial 3	Trial 4	Trial 5	Trial 6	Trial 7	Trial 8	Trial 9	Trial 10	Trial 11	Trial 12	Trial 13	Trial 14	Trial 15	Trial 16	Trial 17	Trial 18	Trial 19		Trial 1	Trial 2	Trial 3	Trial 4	Trial 5	Trial 6	Trial 7	Trial 8	Trial 9	Trial 10	Trial 11	Trial 12	Trial 13	Trial 14	Trial 15	Trial 16	Trial 17	Trial 18	Trial 19
		0.881444	1	0	1	1	1	1	1	1	1	1	1	1	1	1	1	0	1	1	1		1	1	1	1	1	1	1	1	1	1	1	0	1	0	0	0	1	1	0
		0.627089	1	1	1	1	1	1	0	1	1	1	1	0	1	1	1	1	1	1	1		0	0	0	1	0	0	0	1	0	0	1	0	0	0	1	0	1	0	1
		0.272688	1	1	0	1	1	1	1	0	1	1	1	1	0	1	1	1	0	1	1		0	0	0	0	0	0	0	0	0	0	0	0	0	0	1	0	0	0	0
		-0.125217	0	1	1	1	0	0	1	1	1	1	0	1	0	1	1	1	1	0	0		0	0	0	0	0	0	0	0	0	0	0	0	0	0	0	0	0	0	0
		-0.503153	0	0	1	0	0	0	0	1	0	0	0	0	0	0	0	0	1	0	0		0	0	0	0	0	0	0	0	0	0	0	0	0	0	0	0	0	0	0
		-0.800832	0	0	0	0	0	0	0	0	0	0	0	0	0	0	0	0	0	0	0		0	0	0	0	0	0	0	0	0	0	0	0	0	0	0	0	0	0	0
		-0.970762	0	0	0	0	0	0	0	0	0	0	0	0	0	0	0	0	0	0	0		0	0	0	0	0	0	0	0	1	0	0	0	0	0	0	0	0	0	0
		-0.985809	0	0	0	0	0	0	0	0	0	0	0	0	0	0	0	0	0	0	0		0	0	0	0	0	0	0	0	0	0	0	0	0	0	0	0	0	0	0
		-0.843397	0	0	0	0	0	0	0	0	0	0	0	0	0	0	0	0	0	0	0		1	0	0	0	0	0	0	0	0	0	0	0	0	0	0	0	1	0	0
		-0.565777	0	0	0	0	0	0	0	0	0	0	0	0	0	0	0	0	0	0	0		1	1	0	0	1	1	1	1	0	1	1	1	1	0	0	0	0	0	0
		-0.196167	0	0	0	0	0	0	0	0	0	0	0	0	0	0	0	0	0	0	1		0	1	1	1	1	1	1	1	0	1	1	1	1	1	0	1	1	1	1
		0.208074	1	0	0	1	0	1	1	1	0	1	0	0	0	0	0	1	1	1	1		1	1	1	1	1	1	1	1	1	1	1	1	1	1	1	1	1	1	1
		0.583277	1	0	0	1	1	1	0	1	1	1	1	1	1	1	1	0	1	1	1		1	1	1	1	1	1	1	1	1	1	1	1	1	1	1	1	1	1	1
		0.865953	1	1	1	1	1	1	1	1	1	1	1	1	0	1	1	1	0	1	1		1	1	1	1	1	1	1	1	1	1	1	1	1	1	1	1	1	1	1
		0.995569	1	1	0	1	1	1	1	0	1	1	1	0	1	1	1	1	1	0	1		1	1	1	1	1	0	1	0	1	0	1	0	1	1	1	1	1	0	1
		0.915922	1	1	1	0	1	1	1	1	1	1	1	1	0	1	1	1	1	1	1		0	0	1	0	1	1	1	0	1	1	0	1	0	0	1	0	0	1	1
		0.587682	1	1	1	1	0	1	1	1	0	1	1	1	1	1	1	1	1	1	0		0	1	1	1	0	0	0	0	0	1	0	1	0	1	0	1	0	1	0
		0.0335394	0	1	1	1	1	1	1	1	1	0	1	1	1	0	0	1	1	1	1		0	0	0	0	0	0	0	0	1	0	0	0	0	1	0	1	0	0	0
		-0.589052	0	1	1	1	1	0	0	0	1	1	0	0	1	1	1	0	1	0	0		0	0	0	0	0	0	0	0	0	0	0	0	0	0	0	0	0	0	0
		-0.975344	0	0	0	0	0	1	0	0	0	0	1	0	0	0	1	0	0	0	0		0	0	0	0	0	0	0	1	0	0	0	0	0	0	0	0	0	0	0
		-0.848037	0	0	0	0	0	0	0	0	0	0	0	0	0	0	0	0	0	0	0		0	0	0	0	0	0	0	1	0	0	1	0	0	0	0	0	0	0	0
		-0.23718	0	0	0	0	0	0	0	0	0	0	0	0	0	0	0	0	0	0	0		1	0	0	1	0	1	0	1	0	0	1	1	1	0	0	0	1	1	0
		0.487435	1	0	0	0	0	0	0	1	0	0	0	0	0	0	0	0	0	1	0		1	1	0	1	1	1	1	1	0	1	1	1	1	1	1	1	1	1	1
		0.932594	1	0	1	1	1	1	1	0	1	0	1	1	1	1	0	0	0	0	1		1	1	1	1	1	1	1	1	1	1	1	0	1	1	1	1	1	1	1
		0.961496	1	1	0	0	1	1	1	1	1	1	1	1	0	1	1	1	1	1	1		1	1	1	1	1	1	1	0	1	1	0	1	1	1	1	1	1	0	1
		0.671661	1	1	1	1	1	1	1	0	0	1	1	1	1	0	1	1	1	0	0		1	1	1	1	1	0	1	0	1	0	0	0	1	0	1	0	1	1	1
		0.230393	0	1	1	0	0	1	1	1	1	1	1	1	1	1	1	1	1	1	1		0	0	1	0	0	0	1	1	1	1	0	1	0	1	1	1	0	0	1
		-0.22776	1	1	1	1	1	0	1	0	1	0	0	1	1	1	0	1	1	1	1		0	0	0	1	0	1	0	0	0	0	0	0	0	0	0	0	0	0	0
		-0.616711	0	0	1	1	0	0	0	0	1	1	0	0	0	1	1	0	0	0	1		0	0	0	0	0	0	0	0	0	0	0	0	0	0	0	1	0	0	0
		-0.883325	0	1	0	0	0	0	0	0	0	1	0	0	0	0	1	0	0	0	0		0	0	0	0	0	0	0	0	0	0	0	0	0	0	0	0	0	0	0
		-0.996607	0	0	0	0	0	0	0	0	0	0	0	0	0	0	0	0	0	0	0		0	0	0	0	0	0	0	0	0	0	0	0	0	0	0	0	0	0	0
		-0.946108	0	0	0	0	0	0	0	0	0	0	0	0	0	0	0	0	0	0	0		0	0	0	0	0	0	0	0	0	0	0	0	0	0	0	0	0	0	0
		-0.743535	0	0	0	0	0	0	0	0	0	0	0	0	0	0	0	0	0	0	0		0	0	0	0	0	0	0	0	0	0	0	0	0	0	0	0	1	1	0
		-0.4224	0	0	0	0	0	0	0	0	0	0	0	0	0	0	0	0	0	0	0		0	0	0	0	0	0	1	0	1	0	1	0	0	0	1	0	1	1	1
		-0.034104	0	0	0	0	1	0	0	0	0	0	0	1	0	0	0	0	0	0	1		1	1	1	0	1	1	1	1	1	0	1	1	1	1	1	0	1	1	1
		0.359469	1	1	1	0	1	1	1	0	1	0	1	1	1	1	1	1	0	1	1		1	1	1	1	1	1	1	1	1	1	1	1	1	1	1	1	1	1	1
		0.695626	1	1	1	1	1	1	1	1	0	1	1	1	1	1	1	1	1	1	0		1	1	1	1	1	1	1	0	1	1	1	1	1	0	0	1	1	0	1
		0.920782	1	1	1	1	0	1	1	1	1	1	1	1	1	0	1	1	1	1	1		1	1	1	1	1	1	1	1	1	1	1	1	1	1	1	1	1	1	1
		0.999036	1	1	1	0	1	1	1	1	0	1	1	1	1	1	0	1	1	1	1		1	0	1	1	1	1	0	1	1	1	1	1	1	1	1	1	0	1	1

## Sheet: Figure2_supplement_Fig1_B
		response duration
		beat frequency	single unit FR		correlation
			mean	SE	mean	SE
		1	15.6486	6.63763	398.625	20.3504
		2	14.4319	5.00062	127.125	4.31541
		4	15.3201	4.34788	57.625	4.50768
		8	12.8386	5.55831	32.625	1.11704
		16	13.4886	4.86686	21.75	2.46221
		32	9.09298	2.05977	12.25	0.411877
		64	6.26667	1.99272	5.8275	0.288343
		128	4.85439	1.3719	4.1275	0.278149

## Sheet: Figure2_supplement_Fig1_C
		Invariance Score
		beat frequency	window single unit FR		window correlation
			mean	SE	mean	SE
		1	0.261135	0.00231067	0.162175	0.000635195
		2	0.261646	0.000864484	0.131859	0.00053758
		4	0.231204	0.00225219	0.0894275	0.000797409
		8	0.21113	0.00101132	0.0746043	0.000501769
		16	0.0897007	0.00131071	0.0616129	0.00180612
		32	0.0814236	0.00387402	0.0586622	0.00277804
		64	0.202655	0.00320064	0.200074	0.00395106
		128	0.18261	0.00776793	0.194685	0.00678686

## Sheet: Figure2_supplement_Fig1_D
		Detectability
		beat frequency	window single unit FR		window correlation
			mean	SE	mean	SE
		1	0.198312	0.0921712	0.0518251	0.00182071
		2	0.218736	0.0818955	0.0504463	0.00387957
		4	0.176285	0.0345356	0.0523426	0.00818324
		8	0.270765	0.0486336	0.0441007	0.00948988
		16	0.216322	0.0250606	0.0525734	0.0139717
		32	0.238855	0.0352344	0.053557	0.0143534
		64	0.195152	0.0753876	0.053636	0.0072628
		128	0.18473	0.0376233	0.0547634	0.00563798
