# Supplementary material for: Stimulus background influences phase invariant coding by correlated neural activity
Source: eLife. 2017 Mar 18;6:e24482. doi: 10.7554/eLife.24482 (PMC5389862; doi:10.7554/eLife.24482)
Supplement: Figure 2—figure supplement 2—source data 1. — DOI: http://dx.doi.org/10.7554/eLife.24482.009 [file elife-24482-fig2-figsupp2-data1.xlsx]

## Sheet: Figure2_supplement_Fig2_A
		phase lockin index
			Threshold (%)
		beat frequency	0.05
		(Hz)	mean	SE
		1	0	0
		2	0	0
		4	0	0
		8	0	0
		16	0.00188088	0.00188088
		32	0.0274015	0.00587016
		64	0.164224	0.0141917
		128	0.0918103	0.00901423

## Sheet: Figure2_supplement_Fig2_B
		phase histogram
		beat phase	normalized spike count			fit
			2 Hz	16 Hz	64 Hz	2 Hz	16 Hz	64 Hz
		0	0.0416519	0.0454141	0.0620884	0.0412748	0.042379	0.0447742
		0.224399	0.0396838	0.032057	0.0413923	0.0402043	0.037845	0.0361026
		0.448799	0.0386514	0.0271594	0.0366886	0.0388348	0.0331282	0.0273314
		0.673198	0.0363284	0.032057	0.00752587	0.0372348	0.0284653	0.0189003
		0.897598	0.0352638	0.0213713	0	0.0354847	0.0240899	0.0112322
		1.122	0.0339087	0.0235975	0.000940734	0.0336722	0.0202216	0.00471148
		1.3464	0.0312308	0.0155833	0	0.0318881	0.0170542	0
		1.5708	0.0301339	0.0164737	0	0.030222	0.0147466	0
		1.7952	0.028682	0.0146928	0	0.0287574	0.0134145	0
		2.0196	0.0280368	0.0120214	0	0.0275677	0.0131248	0
		2.24399	0.0263914	0.0124666	0	0.0267126	0.0138918	0
		2.46839	0.0269398	0.0182547	0	0.026235	0.0156773	0.00223322
		2.69279	0.0263914	0.0146928	0	0.0261588	0.0183916	0.00812452
		2.91719	0.0264881	0.0249332	0.000940734	0.0264878	0.0218986	0.0153191
		3.14159	0.0278432	0.0262689	0.00658514	0.0272055	0.0260225	0.0234562
		3.36599	0.0276496	0.0338379	0.0319849	0.028276	0.0305565	0.0321278
		3.59039	0.030392	0.0360641	0.0667921	0.0296456	0.0352733	0.040899
		3.81479	0.0309082	0.0333927	0.0620884	0.0312456	0.0399362	0.0493301
		4.03919	0.0325214	0.0431879	0.0752587	0.0329957	0.0443116	0.0569983
		4.26359	0.0345862	0.048976	0.0630292	0.0348082	0.0481799	0.0635189
		4.48799	0.0359735	0.048976	0.060207	0.0365922	0.0513473	0.0685652
		4.71239	0.0382965	0.0583259	0.0724365	0.0382583	0.0536549	0.071884
		4.93679	0.0397161	0.0529831	0.0573848	0.0397229	0.054987	0.0733089
		5.16119	0.0402646	0.0583259	0.0658514	0.0409126	0.0552767	0.0727685
		5.38559	0.0426198	0.0512021	0.0583255	0.0417677	0.0545097	0.0702898
		5.60999	0.042039	0.0538736	0.0611477	0.0422454	0.0527242	0.0659972
		5.83439	0.0427488	0.0507569	0.0630292	0.0423216	0.0500099	0.0601059
		6.05879	0.0429747	0.0507569	0.0526811	0.0419926	0.0465029	0.0529113
		6.28319	0.0416841	0.0422974	0.0536218	0.0412748	0.042379	0.0447742
