# Supplementary material for: Stimulus background influences phase invariant coding by correlated neural activity
Source: eLife. 2017 Mar 18;6:e24482. doi: 10.7554/eLife.24482 (PMC5389862; doi:10.7554/eLife.24482)
Supplement: Figure 2—source data 1. — DOI: http://dx.doi.org/10.7554/eLife.24482.005 [file elife-24482-fig2-data1.xlsx]

## Sheet: Figure2B
		phase 1												phase 2												phase 3												phase 4
		2 Hz				16 Hz				64 Hz				2 Hz				16 Hz				64 Hz				2 Hz				16 Hz				64 Hz				2 Hz				16 Hz				64 Hz
		signal	single unit firing rate	correlation		signal	single unit firing rate	correlation		signal	single unit firing rate	correlation		signal	single unit firing rate	correlation		signal	single unit firing rate	correlation		signal	single unit firing rate	correlation		signal	single unit firing rate	correlation		signal	single unit firing rate	correlation		signal	single unit firing rate	correlation		signal	single unit firing rate	correlation		signal	single unit firing rate	correlation		signal	single unit firing rate	correlation
		0.988531	0.865546	-0.0454635		0.988539	0.45921	0.225417		0.988425	0.957316	-0.109969		0.704102	0.336276	0.106461		0.703229	0.095978	-0.0846048		0.70148	0.738856	0.00190234		0.00721917	-0.117004	0.0325858		0.00597653	-0.37514	0.502365		0.00349214	-0.365532	1.00001		-0.693595	-0.921305	0.0830821		-0.667778	0.0789225	0.697256		-0.669607	-1	1
		0.988557	0.863127	-0.0462434		0.988558	0.457312	0.237297		0.988506	0.95736	-0.10708		0.699728	0.330937	0.105804		0.69885	0.0971861	-0.0748841		0.69709	0.735322	0.00223915		0.00100795	-0.120943	0.033736		-0.000234714	-0.37645	0.500707		-0.00271905	-0.381299	1.00001		-0.698082	-0.921817	0.0825276		-0.672345	0.079117	0.695891		-0.674164	-1	1
		0.988544	0.860637	-0.0469812		0.988537	0.455338	0.249048		0.988547	0.95725	-0.10436		0.695327	0.325578	0.105104		0.694443	0.098336	-0.0648861		0.692672	0.731788	0.00193124		-0.00520332	-0.124864	0.0348946		-0.00644595	-0.377827	0.499607		-0.00893013	-0.397065	1.00001		-0.702294	-0.922299	0.0820131		-0.676885	0.0792676	0.694269		-0.678693	-1	1
		0.988492	0.858077	-0.047672		0.988477	0.453325	0.260482		0.98855	0.95714	-0.101878		0.690898	0.320203	0.104369		0.690009	0.0994534	-0.0547175		0.688226	0.728254	0.00116967		-0.0114144	-0.128768	0.0360653		-0.0126569	-0.379261	0.499078		-0.0151409	-0.412832	1.00001		-0.706773	-0.922748	0.0815356		-0.681399	0.0792914	0.692407		-0.683196	-1	1
		0.9884	0.855446	-0.0483125		0.988377	0.451226	0.271409		0.988513	0.957029	-0.0996779		0.686442	0.314812	0.103606		0.685547	0.100522	-0.0444744		0.683753	0.724461	0.000159062		-0.017625	-0.132656	0.0372506		-0.0188674	-0.380732	0.499133		-0.021351	-0.428598	1.00001		-0.711123	-0.923158	0.0810921		-0.685885	0.0792586	0.690338		-0.687672	-1	1
		0.98827	0.852746	-0.0489004		0.988239	0.44906	0.281644		0.988437	0.956919	-0.0977832		0.681958	0.309407	0.102824		0.681059	0.101503	-0.0342401		0.679254	0.720602	-0.000900978		-0.0238349	-0.136528	0.038452		-0.0250772	-0.382301	0.499784		-0.0275603	-0.444365	1		-0.715338	-0.923524	0.0806794		-0.690345	0.0791411	0.688109		-0.692121	-1	1
		0.988101	0.849978	-0.049434		0.988062	0.446847	0.291018		0.988323	0.956809	-0.0961978		0.677448	0.30399	0.102026		0.676543	0.102434	-0.0240845		0.674727	0.716743	-0.00181893		-0.0300439	-0.140387	0.0396701		-0.0312859	-0.383912	0.501038		-0.0337685	-0.460132	1		-0.719748	-0.923838	0.0802942		-0.694777	0.0789025	0.685773		-0.696542	-1	1
		0.987893	0.847144	-0.0499118		0.987846	0.444517	0.299389		0.98817	0.956306	-0.0949049		0.672912	0.298564	0.101218		0.672001	0.103252	-0.0140636		0.670174	0.712885	-0.00240494		-0.0362517	-0.144231	0.0409045		-0.0374934	-0.385586	0.502903		-0.0399754	-0.474883	1		-0.72392	-0.924096	0.0799327		-0.699182	0.0786019	0.683392		-0.700936	-1	1
		0.987645	0.844249	-0.0503333		0.987591	0.44214	0.306647		0.987977	0.955213	-0.0938646		0.668348	0.293129	0.1004		0.667432	0.103967	-0.00421881		0.665595	0.709026	-0.00246403		-0.042458	-0.148059	0.0421535		-0.0436995	-0.387342	0.505389		-0.0461807	-0.489634	1		-0.728059	-0.92429	0.0795908		-0.703559	0.0781741	0.68103		-0.705302	-1	1
		0.987359	0.841294	-0.0506991		0.987297	0.439692	0.312717		0.987746	0.954119	-0.0930152		0.663758	0.287685	0.0995711		0.662837	0.104612	0.00542194		0.660989	0.705168	-0.00179631		-0.0486627	-0.151869	0.0434148		-0.0499038	-0.389141	0.508506		-0.0523842	-0.504386	1		-0.732354	-0.924415	0.0792639		-0.707908	0.0776464	0.678749		-0.70964	-1	1
		0.987034	0.838283	-0.0510112		0.986964	0.437151	0.317562		0.987476	0.953026	-0.0922784		0.659142	0.282233	0.0987306		0.658216	0.105058	0.0148418		0.656357	0.701168	-0.000207169		-0.0548654	-0.155659	0.0446853		-0.0561061	-0.391021	0.512275		-0.0585856	-0.519137	1		-0.736474	-0.924468	0.0789478		-0.71223	0.0770522	0.676607		-0.71395	-1	1
		0.98667	0.835217	-0.051273		0.986592	0.434563	0.321172		0.987166	0.951933	-0.0915666		0.6545	0.276778	0.0978755		0.653569	0.105415	0.0240295		0.6517	0.696957	0.0024739		-0.061066	-0.159427	0.045961		-0.0623062	-0.392963	0.516715		-0.0647848	-0.533888	1		-0.74051	-0.924443	0.0786387		-0.716523	0.076284	0.674653		-0.718232	-1	1
		0.986266	0.832096	-0.0514888		0.986181	0.431882	0.32357		0.986818	0.95084	-0.0907924		0.649832	0.271318	0.0970032		0.648896	0.105639	0.0329742		0.647016	0.692746	0.00636929		-0.0672642	-0.163172	0.0472376		-0.0685039	-0.394944	0.521849		-0.0709814	-0.54864	1		-0.744612	-0.924339	0.0783336		-0.720788	0.0754432	0.672925		-0.722486	-1	1
		0.985824	0.828921	-0.0516635		0.985731	0.429132	0.324798		0.986431	0.949747	-0.0898788		0.645139	0.265854	0.096111		0.644197	0.105664	0.0416608		0.642308	0.688534	0.0115297		-0.0734597	-0.166891	0.0485094		-0.0746989	-0.397026	0.527696		-0.0771751	-0.562666	1		-0.748691	-0.924154	0.07803		-0.725025	0.0744937	0.671446		-0.72671	-1	1
		0.985343	0.825695	-0.0518011		0.985242	0.426335	0.324916		0.986005	0.947729	-0.0887677		0.64042	0.260387	0.095196		0.639473	0.105585	0.0500683		0.637574	0.684323	0.0179177		-0.0796524	-0.170586	0.0497702		-0.0808909	-0.399148	0.534269		-0.0833659	-0.576208	1		-0.752772	-0.923888	0.0777261		-0.729233	0.0733951	0.670226		-0.730906	-1	1
		0.984823	0.822417	-0.0519043		0.984715	0.423422	0.323996		0.98554	0.945711	-0.087425		0.635676	0.254917	0.0942559		0.634724	0.105285	0.0581691		0.632814	0.680112	0.0254063		-0.0858418	-0.174256	0.051013		-0.0870797	-0.40133	0.541564		-0.0895534	-0.589751	1		-0.756828	-0.923541	0.0774196		-0.733412	0.072222	0.669264		-0.735074	-1	1
		0.984265	0.819086	-0.0519738		0.984148	0.420464	0.322122		0.985036	0.943693	-0.0858423		0.630906	0.249446	0.0932891		0.62995	0.104804	0.0659289		0.62803	0.675901	0.0337987		-0.0920279	-0.177904	0.052231		-0.0932651	-0.403588	0.549562		-0.0957373	-0.603294	1		-0.760753	-0.923114	0.0771081		-0.737562	0.0708999	0.668548		-0.739212	-1	1
		0.983667	0.815704	-0.0520096		0.983543	0.417436	0.319384		0.984493	0.941675	-0.0840356		0.626112	0.243973	0.0922952		0.625151	0.104202	0.0733072		0.623221	0.67125	0.042863		-0.0982104	-0.18153	0.0534188		-0.0994468	-0.405883	0.558225		-0.101918	-0.616836	0.999999		-0.764692	-0.922606	0.0767884		-0.741683	0.0694692	0.668058		-0.743321	-1	1
		0.98303	0.812272	-0.0520115		0.982899	0.41432	0.315876		0.983911	0.939657	-0.0820417		0.621293	0.2385	0.0912741		0.620327	0.103274	0.080257		0.618388	0.6666	0.0523702		-0.104389	-0.185138	0.0545732		-0.105625	-0.408248	0.567498		-0.108094	-0.630379	0.999999		-0.768662	-0.922017	0.0764567		-0.745775	0.0679661	0.667771		-0.747401	-1	1
		0.982355	0.808789	-0.0519805		0.982215	0.411161	0.311695		0.98329	0.937639	-0.0799112		0.61645	0.233027	0.0902267		0.615478	0.102209	0.0867275		0.61353	0.66195	0.0621249		-0.110563	-0.188728	0.0556933		-0.111798	-0.41066	0.577312		-0.114266	-0.643647	0.999999		-0.772506	-0.921348	0.0761091		-0.749837	0.0662913	0.667667		-0.751451	-1	1
		0.981641	0.805256	-0.0519186		0.981494	0.407919	0.306929		0.98263	0.935275	-0.0777009		0.611582	0.227556	0.0891542		0.610606	0.100936	0.0926673		0.608648	0.6573	0.0719837		-0.116734	-0.192303	0.0567806		-0.117967	-0.413103	0.587587		-0.120433	-0.655818	0.999999		-0.776331	-0.9206	0.0757418		-0.75387	0.0645521	0.667732		-0.755472	-1	1
		0.980888	0.801674	-0.0518279		0.980733	0.404619	0.301663		0.981931	0.932682	-0.0754639		0.60669	0.222088	0.0880587		0.605709	0.0993741	0.0980291		0.603741	0.65265	0.0818608		-0.122899	-0.195867	0.0578374		-0.124132	-0.415609	0.598235		-0.126596	-0.667989	0.999999		-0.780267	-0.919774	0.075351		-0.757873	0.0627164	0.667961		-0.759463	-1	1
		0.980097	0.798043	-0.0517104		0.979934	0.401281	0.295966		0.981194	0.930089	-0.0732448		0.601774	0.216624	0.0869432		0.600788	0.0976635	0.102774		0.598812	0.648	0.0917249		-0.12906	-0.199423	0.0588668		-0.130292	-0.418133	0.609161		-0.132753	-0.68016	0.999999		-0.784018	-0.918873	0.0749334		-0.761846	0.0607589	0.668362		-0.763424	-1	1
		0.979266	0.794363	-0.051568		0.979096	0.397847	0.289897		0.980417	0.927495	-0.0710813		0.596834	0.211164	0.085811		0.595844	0.0956487	0.106873		0.593858	0.642993	0.10159		-0.135215	-0.202973	0.0598721		-0.136446	-0.420685	0.620263		-0.138906	-0.692331	0.999999		-0.787767	-0.917897	0.0744864		-0.765789	0.0587417	0.668955		-0.767355	-1	1
		0.978398	0.790635	-0.0514022		0.978219	0.394373	0.283508		0.979602	0.924902	-0.0690107		0.591871	0.205708	0.0846664		0.590876	0.0933957	0.110312		0.588881	0.637748	0.111502		-0.141365	-0.206519	0.0608556		-0.142595	-0.42326	0.631433		-0.145053	-0.704502	0.999999		-0.791676	-0.916852	0.0740082		-0.769702	0.056607	0.669772		-0.771255	-1	1
		0.97749	0.786861	-0.0512148		0.977304	0.39084	0.276852		0.978748	0.922309	-0.0670748		0.586884	0.200257	0.0835137		0.585884	0.0909839	0.113089		0.583881	0.632502	0.121528		-0.14751	-0.210062	0.0618185		-0.148739	-0.425842	0.642555		-0.151194	-0.716673	0.999999		-0.795208	-0.915744	0.0734983		-0.773585	0.0543851	0.670855		-0.775126	-1	1
		0.976544	0.783043	-0.0510074		0.97635	0.387221	0.269985		0.977856	0.919693	-0.0653196		0.581874	0.194811	0.0823572		0.58087	0.088164	0.115214		0.578857	0.627257	0.131751		-0.153649	-0.213601	0.0627605		-0.154876	-0.428434	0.65351		-0.157329	-0.727675	0.999999		-0.798788	-0.91458	0.0729573		-0.777436	0.052105	0.672253		-0.778965	-1	1
		0.975559	0.779185	-0.0507811		0.975358	0.383558	0.262973		0.976925	0.916991	-0.0637871		0.576842	0.189367	0.0812003		0.575833	0.0851811	0.116706		0.573811	0.622012	0.142269		-0.159782	-0.217136	0.0636797		-0.161008	-0.431023	0.664172		-0.163458	-0.738383	1		-0.802615	-0.913369	0.0723866		-0.781258	0.049679	0.674021		-0.782774	-1	1
		0.974536	0.775288	-0.0505367		0.974327	0.379804	0.255887		0.975955	0.914288	-0.0625054		0.571786	0.183926	0.080046		0.570773	0.0819539	0.117595		0.568742	0.616767	0.153208		-0.165908	-0.220669	0.0645725		-0.167133	-0.433611	0.674422		-0.169581	-0.749092	1		-0.80615	-0.912121	0.0717882		-0.785048	0.047194	0.676213		-0.786552	-1	1
		0.973474	0.771358	-0.050275		0.973257	0.375982	0.248803		0.974947	0.911585	-0.0614826		0.566708	0.178487	0.0788959		0.56569	0.0784106	0.117921		0.56365	0.611378	0.164724		-0.172028	-0.224198	0.0654343		-0.173251	-0.436176	0.684151		-0.175697	-0.759801	1		-0.809756	-0.910845	0.071164		-0.788807	0.0446206	0.678883		-0.790299	-1	1
		0.972374	0.767396	-0.0499968		0.97215	0.372113	0.241801		0.9739	0.908882	-0.0607078		0.561607	0.173048	0.0777515		0.560585	0.0747126	0.117728		0.558537	0.605414	0.177002		-0.178141	-0.227723	0.0662604		-0.179363	-0.438726	0.693267		-0.181806	-0.77051	1		-0.813412	-0.909549	0.0705172		-0.792535	0.041929	0.682073		-0.794015	-1	1
		0.971236	0.763407	-0.0497033		0.971003	0.368132	0.234961		0.972815	0.906179	-0.0601555		0.556485	0.167611	0.0766141		0.555458	0.0707118	0.117069		0.553401	0.599451	0.190235		-0.184247	-0.231243	0.0670473		-0.185468	-0.441252	0.701703		-0.187908	-0.781219	1		-0.816803	-0.908237	0.069852		-0.796232	0.039179	0.685817		-0.7977	-1	1
		0.970059	0.75939	-0.0493958		0.969819	0.364106	0.228362		0.971692	0.903476	-0.0597909		0.55134	0.162173	0.0754856		0.550309	0.0664952	0.116002		0.548243	0.593487	0.204595		-0.190346	-0.234753	0.0677927		-0.191565	-0.443734	0.709418		-0.194002	-0.791337	1		-0.820207	-0.906916	0.0691738		-0.799898	0.0363134	0.690132		-0.801353	-1	1
		0.968844	0.755346	-0.0490746		0.968596	0.360014	0.222077		0.970531	0.900979	-0.0595738		0.546174	0.156737	0.0743686		0.545138	0.0621347	0.114587		0.543063	0.587524	0.220189		-0.196437	-0.238253	0.0684961		-0.197655	-0.446192	0.716394		-0.200089	-0.800567	1		-0.823706	-0.90559	0.0684895		-0.803532	0.0333653	0.695009		-0.804975	-1	1
		0.96759	0.751275	-0.0487386		0.967335	0.355832	0.216168		0.969331	0.898533	-0.0594608		0.540986	0.151305	0.073266		0.539946	0.0574354	0.112892		0.537862	0.58156	0.237036		-0.20252	-0.24174	0.0691581		-0.203737	-0.448595	0.722633		-0.206167	-0.809798	1		-0.827138	-0.904262	0.067806		-0.807134	0.0303623	0.700417		-0.808565	-1	1
		0.966299	0.747177	-0.0483845		0.966036	0.351604	0.210685		0.968093	0.896087	-0.0594063		0.535777	0.145878	0.0721801		0.534732	0.0526088	0.110989		0.53264	0.575597	0.255041		-0.208596	-0.245212	0.0697796		-0.20981	-0.450951	0.728154		-0.212238	-0.819028	1		-0.830521	-0.902933	0.0671304		-0.810704	0.02723	0.706299		-0.812123	-1	1
		0.964969	0.743049	-0.0480068		0.964699	0.347284	0.205661		0.966816	0.893641	-0.0593636		0.530546	0.140454	0.0711122		0.529498	0.0475915	0.108952		0.527397	0.569055	0.274007		-0.214663	-0.248666	0.0703614		-0.215876	-0.453275	0.732985		-0.2183	-0.828258	1		-0.833944	-0.901603	0.0664689		-0.814243	0.0240492	0.712579		-0.815648	-1	1
		0.963601	0.738889	-0.0475992		0.963323	0.342896	0.20111		0.965502	0.891195	-0.0592864		0.525295	0.135033	0.0700622		0.524242	0.0423337	0.106858		0.522133	0.562368	0.293647		-0.220722	-0.252103	0.0709037		-0.221933	-0.455511	0.737169		-0.224354	-0.837489	1		-0.837218	-0.90027	0.0658264		-0.817749	0.0207958	0.71916		-0.819142	-1	1
		0.962196	0.734695	-0.047155		0.96191	0.338462	0.197032		0.964149	0.88875	-0.0591281		0.520023	0.129615	0.0690291		0.518966	0.0369584	0.104779		0.516848	0.555681	0.313631		-0.226772	-0.255523	0.071407		-0.227981	-0.457709	0.740749		-0.230399	-0.846719	1		-0.840467	-0.898932	0.0652056		-0.821223	0.0174548	0.725933		-0.822603	-1	1
		0.960752	0.730465	-0.0466691		0.960458	0.33392	0.193398		0.962759	0.886507	-0.0588392		0.51473	0.124196	0.0680108		0.513669	0.0313532	0.102786		0.511543	0.548995	0.333618		-0.232813	-0.258925	0.0718724		-0.234021	-0.45985	0.743776		-0.236435	-0.854511	1		-0.843754	-0.897587	0.064607		-0.824664	0.0140735	0.732783		-0.826032	-1	1
		0.95927	0.726199	-0.0461387		0.958969	0.32934	0.190159		0.961331	0.884571	-0.0583656		0.509417	0.118775	0.0670046		0.508352	0.0255825	0.100943		0.506218	0.542308	0.353292		-0.238845	-0.262313	0.0723018		-0.240051	-0.461911	0.746298		-0.242461	-0.862302	1		-0.84698	-0.896233	0.0640286		-0.828073	0.010619	0.739596		-0.829427	-1	1
		0.95775	0.721897	-0.045563		0.957442	0.324703	0.187242		0.959864	0.882634	-0.0576508		0.504084	0.11335	0.0660081		0.503015	0.0197015	0.0993086		0.500873	0.535622	0.372391		-0.244868	-0.265687	0.0726982		-0.246071	-0.46393	0.748366		-0.248478	-0.870094	1		-0.850272	-0.894869	0.0634668		-0.831449	0.00712239	0.746262		-0.832791	-1	1
		0.956193	0.71756	-0.0449435		0.955877	0.319996	0.184559		0.95836	0.880697	-0.0566413		0.498731	0.107918	0.0650194		0.497658	0.0135576	0.0979392		0.495508	0.528665	0.390715		-0.250881	-0.269049	0.0730657		-0.252082	-0.465866	0.750029		-0.254485	-0.877885	1		-0.853463	-0.893495	0.0629172		-0.834793	0.0035977	0.752681		-0.836121	-1	1
		0.954598	0.71319	-0.0442838		0.954274	0.315255	0.18201		0.956818	0.87876	-0.0552966		0.493358	0.102477	0.0640371		0.492282	0.00731464	0.0968879		0.490124	0.521302	0.408132		-0.256884	-0.2724	0.0734094		-0.258083	-0.467735	0.751332		-0.260482	-0.885677	1		-0.856474	-0.892111	0.0623753		-0.838103	2.33e-05	0.758769		-0.839418	-1	1
		0.952965	0.708787	-0.0435898		0.952634	0.310449	0.179497		0.955239	0.876824	-0.0536027		0.487966	0.0970227	0.0630603		0.486885	0.000923217	0.0962051		0.48472	0.51394	0.424576		-0.262876	-0.275743	0.0737349		-0.264074	-0.469559	0.752312		-0.266469	-0.893468	1		-0.859464	-0.890719	0.0618372		-0.84138	-0.0035639	0.764458		-0.842682	-1	1
		0.951294	0.704353	-0.0428687		0.950956	0.305595	0.176924		0.953621	0.874887	-0.0515809		0.482554	0.0915534	0.0620885		0.48147	-0.00565129	0.0959365		0.479297	0.506577	0.440032		-0.268859	-0.279077	0.0740472		-0.270054	-0.471262	0.752994		-0.272445	-0.900445	1		-0.86259	-0.88932	0.0613001		-0.844624	-0.00717045	0.769702		-0.845912	-1	1
		0.949586	0.699888	-0.0421295		0.94924	0.300709	0.174212		0.951966	0.8737	-0.0492876		0.477124	0.086067	0.0611212		0.476036	-0.012313	0.0961203		0.473855	0.499215	0.454522		-0.274831	-0.282405	0.0743508		-0.276024	-0.472912	0.753391		-0.278411	-0.906878	1		-0.865625	-0.887918	0.0607632		-0.847835	-0.0107903	0.774475		-0.849109	-1	1
		0.947841	0.695388	-0.041382		0.947487	0.295747	0.171297		0.950273	0.872513	-0.0468071		0.471675	0.0805625	0.0601576		0.470583	-0.0191402	0.0967856		0.468395	0.491852	0.468099		-0.280792	-0.285726	0.074648		-0.281983	-0.474483	0.753499		-0.284366	-0.913311	1		-0.868556	-0.886517	0.0602273		-0.851013	-0.0144137	0.778774		-0.852273	-1	1
		0.946058	0.690856	-0.0406372		0.945697	0.290756	0.168141		0.948543	0.871326	-0.0442384		0.466207	0.0750414	0.0591967		0.465111	-0.026078	0.0979505		0.462916	0.48449	0.480843		-0.286741	-0.289041	0.0749397		-0.28793	-0.475941	0.753301		-0.290309	-0.919744	1		-0.871567	-0.88512	0.059695		-0.854156	-0.0180383	0.782623		-0.855403	-1	1
		0.944237	0.686289	-0.0399056		0.943869	0.285721	0.164732		0.946775	0.870138	-0.0416846		0.46072	0.0695039	0.0582365		0.459621	-0.0330895	0.0996206		0.457419	0.476466	0.492871		-0.29268	-0.292351	0.0752253		-0.293867	-0.477339	0.752767		-0.296241	-0.926177	1		-0.874484	-0.88373	0.0591697		-0.857266	-0.0216545	0.786067		-0.858499	-1	1
		0.94238	0.681688	-0.039197		0.942004	0.280634	0.161089		0.94497	0.868951	-0.0392479		0.455216	0.0639514	0.0572745		0.454113	-0.0402632	0.101788		0.451903	0.468442	0.504337		-0.298607	-0.295658	0.075503		-0.299791	-0.478616	0.751861		-0.302161	-0.93261	1		-0.877384	-0.882351	0.0586558		-0.860342	-0.0252652	0.789178		-0.861561	-1	1
		0.940485	0.677053	-0.0385194		0.940102	0.275521	0.157263		0.943127	0.867764	-0.0370304		0.449693	0.058386	0.0563083		0.448587	-0.0474935	0.104434		0.44637	0.460418	0.515424		-0.304522	-0.29896	0.0757711		-0.305704	-0.479798	0.750545		-0.30807	-0.938794	1		-0.88017	-0.880987	0.0581583		-0.863385	-0.028847	0.792043		-0.86459	-1	1
		0.938553	0.672382	-0.0378786		0.938162	0.270359	0.153325		0.941247	0.867142	-0.0351342		0.444153	0.0528085	0.0553357		0.443043	-0.0548085	0.107528		0.44082	0.452394	0.526321		-0.310425	-0.302259	0.0760277		-0.311605	-0.480916	0.748784		-0.313966	-0.943977	1		-0.882972	-0.879642	0.0576831		-0.866393	-0.0324119	0.794761		-0.867584	-1	1
		0.936584	0.667674	-0.0372777		0.936186	0.265163	0.149367		0.93933	0.866897	-0.0336574		0.438595	0.0472207	0.0543548		0.437482	-0.0622212	0.111032		0.435252	0.44437	0.537195		-0.316316	-0.305554	0.0762712		-0.317493	-0.481871	0.746551		-0.31985	-0.94916	1		-0.88582	-0.87832	0.0572361		-0.869367	-0.0359516	0.797437		-0.870544	-1	1
		0.934578	0.662926	-0.0367164		0.934172	0.259944	0.145486		0.937376	0.866652	-0.0326829		0.43302	0.0416244	0.0533646		0.431903	-0.0696796	0.114904		0.429666	0.436346	0.548158		-0.322195	-0.308846	0.0765003		-0.323369	-0.482759	0.743828		-0.325721	-0.954343	1		-0.888519	-0.877025	0.0568231		-0.872306	-0.0394495	0.800172		-0.87347	-1	1
		0.932535	0.658138	-0.036191		0.932122	0.254671	0.141778		0.935384	0.866407	-0.0322648		0.427428	0.0360223	0.0523649		0.426308	-0.0772234	0.119101		0.424064	0.427921	0.559258		-0.32806	-0.312132	0.076714		-0.329232	-0.483547	0.740606		-0.33158	-0.959526	1		-0.891218	-0.875761	0.0564493		-0.875211	-0.0429247	0.803058		-0.876361	-1	1
		0.930456	0.653308	-0.0356943		0.930035	0.24938	0.138328		0.933356	0.866162	-0.0324136		0.421819	0.0304185	0.0513563		0.420695	-0.0848245	0.123586		0.418445	0.419229	0.570478		-0.333913	-0.315412	0.076912		-0.335082	-0.4842	0.736883		-0.337425	-0.96471	1		-0.893827	-0.87453	0.0561183		-0.878082	-0.0463512	0.806178		-0.879218	-1	1
		0.928339	0.648438	-0.0352161		0.927912	0.244059	0.135211		0.93129	0.865917	-0.033087		0.416193	0.0248173	0.0503402		0.415066	-0.0924639	0.128326		0.41281	0.410538	0.581746		-0.339753	-0.318683	0.0770943		-0.340919	-0.484787	0.732666		-0.343257	-0.969893	1		-0.896542	-0.873335	0.0558324		-0.880918	-0.0497365	0.809595		-0.882041	-1	1
		0.926186	0.64353	-0.0347444		0.925751	0.238705	0.132486		0.929188	0.865858	-0.0341865		0.410551	0.0192227	0.0493185		0.409421	-0.100191	0.133297		0.407158	0.401846	0.592959		-0.345579	-0.321946	0.0772618		-0.346743	-0.48524	0.727969		-0.349076	-0.974176	1		-0.899164	-0.872175	0.0555912		-0.883719	-0.0530945	0.813355		-0.884828	-1	1
		0.923997	0.638585	-0.0342663		0.923554	0.233337	0.130191		0.927049	0.866542	-0.0355644		0.404893	0.0136383	0.0482937		0.403759	-0.107952	0.138481		0.40149	0.393155	0.604		-0.351392	-0.3252	0.0774163		-0.352553	-0.485596	0.722821		-0.35488	-0.978235	1		-0.901627	-0.871049	0.0553912		-0.886485	-0.0563778	0.817486		-0.88758	-1	1
		0.921771	0.633606	-0.03377		0.921321	0.227943	0.128341		0.924874	0.867226	-0.0370413		0.399218	0.00806723	0.0472693		0.398082	-0.115761	0.14387		0.395806	0.384463	0.614766		-0.35719	-0.328447	0.0775608		-0.358349	-0.485886	0.717263		-0.360671	-0.982294	1		-0.904153	-0.869954	0.0552255		-0.889216	-0.0596303	0.821995		-0.890298	-1	1
		0.919508	0.628595	-0.0332451		0.919051	0.222538	0.126929		0.922662	0.86791	-0.0384346		0.393528	0.00251067	0.0462492		0.392389	-0.123633	0.149461		0.390106	0.375639	0.625182		-0.362975	-0.331687	0.077699		-0.36413	-0.486018	0.711351		-0.366447	-0.986353	1		-0.906653	-0.868886	0.0550843		-0.891913	-0.0628363	0.826875		-0.892981	-1	1
		0.917209	0.623554	-0.0326837		0.916745	0.217125	0.125924		0.920413	0.868594	-0.0395887		0.387822	-0.00303175	0.0452387		0.38668	-0.131534	0.15526		0.384391	0.366286	0.635211		-0.368745	-0.33492	0.0778357		-0.369898	-0.486089	0.705156		-0.372209	-0.990411	1		-0.909264	-0.867842	0.054956		-0.894574	-0.0659814	0.832103		-0.895628	-1	1
		0.914874	0.618487	-0.0320805		0.914403	0.2117	0.125284		0.918129	0.869277	-0.0403963		0.382101	-0.00856002	0.0442437		0.380956	-0.139493	0.161278		0.378661	0.356933	0.64485		-0.374501	-0.338146	0.0779763		-0.37565	-0.48607	0.69876		-0.377956	-0.99447	1		-0.911555	-0.866814	0.0548283		-0.897199	-0.0690969	0.837643		-0.89824	-1	1
		0.912503	0.613393	-0.0314331		0.912025	0.206272	0.124951		0.915808	0.869961	-0.040808		0.376365	-0.0140765	0.0432703		0.375217	-0.147492	0.167534		0.372916	0.34758	0.65413		-0.380242	-0.341363	0.0781262		-0.381388	-0.485938	0.692249		-0.383689	-0.997099	1		-0.91386	-0.865797	0.0546902		-0.899789	-0.0721547	0.843453		-0.900816	-1	1
		0.910096	0.608276	-0.0307415		0.90961	0.20084	0.124861		0.913451	0.87115	-0.0408312		0.370614	-0.0195827	0.0423246		0.369463	-0.155517	0.174055		0.367156	0.338227	0.663105		-0.385967	-0.34457	0.0782905		-0.387111	-0.48575	0.685714		-0.389406	-0.997582	1		-0.916388	-0.864783	0.0545326		-0.902344	-0.0751727	0.849477		-0.903357	-1	1
		0.907653	0.603136	-0.0300086		0.90716	0.195406	0.12494		0.911058	0.872465	-0.040524		0.364849	-0.0250786	0.041412		0.363695	-0.163595	0.180874		0.361381	0.328873	0.671849		-0.391678	-0.347764	0.078473		-0.392819	-0.485456	0.679238		-0.395107	-0.998066	1		-0.918638	-0.863767	0.0543493		-0.904863	-0.0781641	0.855654		-0.905862	-1	1
		0.905174	0.597975	-0.02924		0.904674	0.189973	0.125116		0.908629	0.87378	-0.0399864		0.359069	-0.0305652	0.0405368		0.357912	-0.171688	0.188025		0.355593	0.31952	0.680448		-0.397373	-0.350945	0.0786761		-0.398511	-0.485084	0.672896		-0.400793	-0.998549	1		-0.920905	-0.862741	0.0541374		-0.907346	-0.0810924	0.861917		-0.908332	-1	1
		0.902659	0.592796	-0.0284435		0.902152	0.184546	0.125319		0.906164	0.875095	-0.0393491		0.353275	-0.0360427	0.0397021		0.352115	-0.179803	0.195545		0.34979	0.309694	0.688999		-0.403053	-0.354111	0.0789001		-0.404187	-0.48466	0.666748		-0.406464	-0.999033	1		-0.923149	-0.8617	0.0538969		-0.909794	-0.0839956	0.868195		-0.910766	-1	1
		0.900109	0.5876	-0.0276288		0.899595	0.179139	0.12549		0.903664	0.87641	-0.0387609		0.347467	-0.0415102	0.0389096		0.346304	-0.187934	0.203465		0.343973	0.299749	0.6976		-0.408716	-0.35726	0.0791431		-0.409847	-0.484109	0.660841		-0.412118	-0.999516	1		-0.925354	-0.860639	0.0536299		-0.912206	-0.086861	0.874418		-0.913163	-1	1
		0.897523	0.582384	-0.0268066		0.897002	0.173746	0.125584		0.901128	0.877725	-0.0383792		0.341645	-0.0469673	0.0381597		0.34048	-0.196069	0.211814		0.338143	0.289805	0.706347		-0.414364	-0.36039	0.0794013		-0.415492	-0.483507	0.655213		-0.417756	-1	1		-0.927528	-0.859551	0.0533406		-0.914581	-0.0896745	0.880514		-0.915525	-1	1
		0.894902	0.577148	-0.0259879		0.894374	0.168421	0.125574		0.898556	0.879091	-0.038364		0.33581	-0.0524138	0.0374512		0.334642	-0.204207	0.220611		0.332299	0.27986	0.715321		-0.419995	-0.363501	0.0796702		-0.421119	-0.482829	0.649893		-0.423377	-1	1		-0.929569	-0.858434	0.0530341		-0.916921	-0.0924619	0.886415		-0.91785	-1	1
		0.892246	0.571889	-0.0251833		0.89171	0.163139	0.125453		0.895949	0.880533	-0.0388753		0.329961	-0.0578501	0.0367817		0.32879	-0.212337	0.229872		0.326442	0.269916	0.724574		-0.425609	-0.36659	0.0799459		-0.426731	-0.482051	0.64491		-0.428982	-1	1		-0.931684	-0.857285	0.0527166		-0.919224	-0.0951967	0.892058		-0.920139	-1	1
		0.889554	0.566607	-0.0244018		0.889011	0.157919	0.125229		0.893307	0.881976	-0.0400703		0.3241	-0.0632766	0.0361477		0.322926	-0.220463	0.239605		0.320573	0.259972	0.734115		-0.431207	-0.369656	0.0802251		-0.432325	-0.481224	0.640289		-0.434569	-1	1		-0.933788	-0.856102	0.0523941		-0.921491	-0.0978931	0.897386		-0.922391	-1	1
		0.886827	0.561298	-0.0236509		0.886277	0.15281	0.124927		0.89063	0.883418	-0.0420965		0.318225	-0.068694	0.0355444		0.317049	-0.22856	0.249817		0.314691	0.249874	0.743904		-0.436788	-0.372701	0.080506		-0.437902	-0.480301	0.636053		-0.44014	-1	1		-0.935804	-0.854885	0.0520724		-0.923722	-0.100564	0.902349		-0.924607	-1	1
		0.884065	0.555962	-0.0229349		0.883508	0.147762	0.124575		0.887917	0.88486	-0.0450788		0.312338	-0.0741018	0.0349668		0.31116	-0.23664	0.260511		0.308796	0.239546	0.753863		-0.442351	-0.375725	0.0807878		-0.443462	-0.479309	0.63222		-0.445693	-1	1		-0.937709	-0.853632	0.0517565		-0.925916	-0.103174	0.906906		-0.926787	-1	1
		0.881268	0.550598	-0.0222552		0.880705	0.142848	0.124211		0.885169	0.886303	-0.0491016		0.306439	-0.0794981	0.0344096		0.305258	-0.244694	0.271687		0.302889	0.229218	0.763886		-0.447897	-0.37873	0.0810708		-0.449004	-0.478272	0.628802		-0.451229	-1	1		-0.939613	-0.852343	0.0514501		-0.928073	-0.105762	0.911022		-0.928929	-1	1
		0.878437	0.545208	-0.0216095		0.877866	0.138047	0.12387		0.882386	0.887745	-0.054188		0.300528	-0.0848815	0.0338676		0.299345	-0.252702	0.283342		0.29697	0.218889	0.773851		-0.453426	-0.381717	0.0813564		-0.454529	-0.47713	0.625804		-0.456747	-1	1		-0.941636	-0.85102	0.0511554		-0.930194	-0.108315	0.914667		-0.931035	-1	1
		0.87557	0.539793	-0.0209923		0.874993	0.133322	0.123584		0.879569	0.888782	-0.06028		0.294605	-0.0902497	0.0333359		0.293419	-0.260683	0.295469		0.29104	0.208561	0.783625		-0.458936	-0.384686	0.081646		-0.460036	-0.475949	0.623231		-0.462247	-1	1		-0.943499	-0.84966	0.0508728		-0.932279	-0.110828	0.91782		-0.933105	-1	1
		0.872669	0.534355	-0.0203949		0.872085	0.128808	0.123383		0.876717	0.889819	-0.0672253		0.28867	-0.0956011	0.0328104		0.287482	-0.268605	0.308056		0.285098	0.198233	0.793075		-0.464428	-0.387637	0.0819422		-0.465525	-0.474712	0.621084		-0.467729	-1	1		-0.945268	-0.848266	0.0505998		-0.934326	-0.11332	0.920461		-0.935137	-1	1
		0.869734	0.528897	-0.0198064		0.869143	0.124384	0.123287		0.87383	0.890856	-0.0747797		0.282724	-0.100935	0.0322874		0.281533	-0.276472	0.321084		0.279145	0.187905	0.802077		-0.469902	-0.390568	0.0822494		-0.470995	-0.473408	0.619366		-0.473192	-1	1		-0.947134	-0.846839	0.0503307		-0.936337	-0.115775	0.922575		-0.937132	-1	1
		0.866765	0.52342	-0.0192153		0.866166	0.120097	0.123308		0.870908	0.891894	-0.0826304		0.276766	-0.10625	0.0317646		0.275574	-0.284302	0.334534		0.27318	0.177498	0.810527		-0.475357	-0.393477	0.0825739		-0.476447	-0.472073	0.618081		-0.478637	-1	1		-0.948903	-0.845378	0.0500573		-0.93831	-0.118205	0.924152		-0.939091	-1	1
		0.863761	0.517928	-0.0186105		0.863156	0.116008	0.123452		0.867952	0.892931	-0.0904393		0.270798	-0.111548	0.0312404		0.269603	-0.292024	0.348387		0.267205	0.16709	0.818351		-0.480794	-0.396364	0.0829235		-0.481879	-0.470682	0.617238		-0.484063	-1	1		-0.950599	-0.843883	0.0497693		-0.940247	-0.120618	0.925183		-0.941012	-1	1
		0.860723	0.512426	-0.0179827		0.860111	0.11202	0.123715		0.864962	0.893968	-0.09789		0.264819	-0.116824	0.0307148		0.263622	-0.299698	0.362623		0.26122	0.156682	0.825503		-0.486212	-0.399229	0.0833059		-0.487293	-0.469255	0.616847		-0.489469	-1	1		-0.952354	-0.842354	0.0494561		-0.942146	-0.12299	0.925664		-0.942897	-1	1
		0.857651	0.506918	-0.0173252		0.857032	0.108244	0.124092		0.861937	0.894508	-0.104726		0.258829	-0.122078	0.0301888		0.257631	-0.307298	0.377226		0.255224	0.146275	0.83196		-0.49161	-0.402069	0.0837289		-0.492688	-0.467803	0.616926		-0.494857	-1	1		-0.954053	-0.84079	0.0491076		-0.944008	-0.125347	0.925596		-0.944744	-1	1
		0.854545	0.501409	-0.0166341		0.85392	0.104638	0.124571		0.858878	0.894716	-0.110769		0.25283	-0.12731	0.029664		0.251629	-0.314795	0.392187		0.249218	0.135867	0.837723		-0.496989	-0.404885	0.0841992		-0.498063	-0.466299	0.617493		-0.500225	-1	1		-0.955639	-0.839188	0.0487161		-0.945833	-0.127682	0.924983		-0.946554	-1	1
		0.851406	0.495903	-0.0159078		0.850774	0.101145	0.125133		0.855786	0.894924	-0.115915		0.24682	-0.132519	0.0291425		0.245617	-0.322237	0.407495		0.243202	0.125459	0.842805		-0.502349	-0.407671	0.0847218		-0.503418	-0.464776	0.618561		-0.505573	-1	1		-0.957222	-0.837548	0.0482761		-0.947621	-0.129992	0.923835		-0.948326	-1	1
		0.848232	0.490402	-0.0151475		0.847594	0.0979468	0.125754		0.852659	0.895132	-0.120123		0.240801	-0.137707	0.0286258		0.239596	-0.329568	0.423138		0.237177	0.115151	0.847236		-0.507688	-0.410427	0.0852998		-0.508754	-0.463226	0.620141		-0.510901	-1	1		-0.958724	-0.835867	0.047785		-0.949371	-0.132291	0.922165		-0.950061	-1	1
		0.845026	0.484905	-0.0143555		0.84438	0.0948706	0.126396		0.849499	0.89534	-0.123393		0.234772	-0.142876	0.0281145		0.233565	-0.336813	0.439094		0.231142	0.104909	0.851054		-0.513008	-0.41315	0.0859332		-0.514069	-0.461644	0.62223		-0.516209	-1	1		-0.960207	-0.834141	0.0472429		-0.951084	-0.134574	0.91999		-0.951759	-1	1
		0.841786	0.479408	-0.0135354		0.841134	0.0919769	0.127013		0.846305	0.895548	-0.125756		0.228734	-0.148025	0.0276089		0.227525	-0.343999	0.455329		0.225098	0.0946668	0.854305		-0.518307	-0.415838	0.0866197		-0.519365	-0.460047	0.624814		-0.521497	-1	1		-0.961721	-0.832367	0.0466519		-0.952759	-0.136851	0.917329		-0.953419	-1	1
		0.838513	0.473908	-0.0126915		0.837854	0.0893302	0.127552		0.843078	0.895539	-0.127253		0.222686	-0.153155	0.0271089		0.221476	-0.351035	0.471799		0.219045	0.0844246	0.857037		-0.523586	-0.41849	0.0873536		-0.524639	-0.458426	0.627867		-0.526764	-1	1		-0.963057	-0.830542	0.0460159		-0.954397	-0.139125	0.914204		-0.955042	-1	1
		0.835206	0.468399	-0.0118278		0.834541	0.0868072	0.127951		0.839817	0.894661	-0.127939		0.21663	-0.158265	0.0266141		0.215419	-0.358007	0.488442		0.212984	0.0741824	0.859305		-0.528844	-0.421103	0.0881269		-0.529893	-0.456791	0.631356		-0.532011	-1	1		-0.964395	-0.828666	0.0453404		-0.955996	-0.141407	0.91064		-0.956627	-1	1
		0.831867	0.462878	-0.0109485		0.831195	0.0845315	0.128146		0.836523	0.893783	-0.127874		0.210566	-0.163354	0.0261244		0.209352	-0.364884	0.505187		0.206914	0.0639403	0.861162		-0.534081	-0.423674	0.0889305		-0.535126	-0.455148	0.635238		-0.537236	-1	1		-0.965825	-0.826737	0.0446322		-0.957559	-0.143698	0.906666		-0.958174	-1	1
		0.828495	0.457338	-0.0100576		0.827816	0.0824404	0.128069		0.833196	0.892905	-0.127132		0.204493	-0.168422	0.0256395		0.203278	-0.371633	0.521949		0.200836	0.0537451	0.862663		-0.539298	-0.426201	0.0897547		-0.540338	-0.453495	0.639462		-0.54244	-1	1		-0.967095	-0.824757	0.043899		-0.959083	-0.146005	0.902318		-0.959684	-1	1
		0.82509	0.451775	-0.00915847		0.824405	0.0804723	0.127655		0.829837	0.892027	-0.1258		0.198412	-0.173467	0.0251594		0.197195	-0.378318	0.538628		0.194749	0.0437378	0.863858		-0.544492	-0.428681	0.09059		-0.545529	-0.451845	0.643976		-0.547623	-1	1		-0.968309	-0.822728	0.0431488		-0.960569	-0.148346	0.897634		-0.961156	-1	1
		0.821653	0.446186	-0.00825413		0.820961	0.0788088	0.126838		0.826444	0.891149	-0.12397		0.192323	-0.17849	0.024685		0.191105	-0.384873	0.555116		0.188656	0.0337306	0.864797		-0.549666	-0.431115	0.0914278		-0.550698	-0.450197	0.64872		-0.552784	-1	1		-0.96961	-0.820653	0.04239		-0.962018	-0.150707	0.892654		-0.962589	-1	1
		0.818183	0.44057	-0.00734623		0.817485	0.077265	0.125553		0.823019	0.890271	-0.121734		0.186227	-0.183489	0.024218		0.185007	-0.391333	0.571298		0.182554	0.0237233	0.865528		-0.554818	-0.433502	0.0922602		-0.555845	-0.448567	0.653637		-0.557923	-1	1		-0.970781	-0.818534	0.04163		-0.963429	-0.153115	0.887418		-0.963985	-1	1
		0.814681	0.434926	-0.00643519		0.813976	0.0759008	0.123741		0.819562	0.8885	-0.119171		0.180123	-0.188468	0.023761		0.178902	-0.39773	0.587055		0.176446	0.013716	0.866092		-0.559947	-0.435843	0.0930803		-0.560971	-0.44695	0.65867		-0.56304	-1	1		-0.971897	-0.816373	0.0408754		-0.964801	-0.155566	0.881964		-0.965343	-1	1
		0.811146	0.429254	-0.00552047		0.810435	0.074769	0.121343		0.816072	0.886505	-0.116335		0.174012	-0.193424	0.0233168		0.17279	-0.403973	0.602268		0.17033	0.00370878	0.866529		-0.565055	-0.438141	0.0938817		-0.566074	-0.445364	0.663765		-0.568134	-1	1		-0.973128	-0.81417	0.0401313		-0.966136	-0.158046	0.876329		-0.966662	-1	1
		0.80758	0.423556	-0.00460076		0.806863	0.0737505	0.11831		0.81255	0.88451	-0.113254		0.167895	-0.19836	0.0228884		0.166671	-0.410157	0.61682		0.164208	-0.00629849	0.866871		-0.57014	-0.440395	0.0946582		-0.571155	-0.443816	0.668873		-0.573207	-1	1		-0.974145	-0.811927	0.0394007		-0.967432	-0.16061	0.870551		-0.967944	-1	1
		0.803982	0.417832	-0.00367432		0.803258	0.0729537	0.114603		0.808996	0.882516	-0.109931		0.16177	-0.203279	0.0224783		0.160545	-0.416251	0.630597		0.158079	-0.0161893	0.867148		-0.575203	-0.442608	0.0954041		-0.576213	-0.442292	0.673952		-0.578256	-1	1		-0.975153	-0.809643	0.0386847		-0.96869	-0.16321	0.864667		-0.969187	-1	1
		0.800352	0.412084	-0.00273965		0.799622	0.0723124	0.110195		0.805411	0.880521	-0.106359		0.15564	-0.208181	0.022089		0.154413	-0.422228	0.643489		0.151944	-0.026051	0.867384		-0.580244	-0.444782	0.0961148		-0.581249	-0.44085	0.678973		-0.583283	-1	1		-0.976304	-0.807321	0.0379815		-0.96991	-0.165865	0.858716		-0.970392	-1	1
		0.79669	0.406315	-0.00179622		0.795954	0.0717749	0.105076		0.801793	0.878527	-0.10253		0.149503	-0.213068	0.0217226		0.148275	-0.428146	0.655393		0.145803	-0.0359126	0.867598		-0.585261	-0.446919	0.0967873		-0.586262	-0.439447	0.683917		-0.588287	-1	1		-0.97714	-0.804959	0.0372875		-0.971091	-0.168593	0.852738		-0.971558	-1	1
		0.792997	0.400524	-0.000844807		0.792255	0.0714749	0.0992567		0.798144	0.87618	-0.0984483		0.14336	-0.217943	0.0213817		0.142131	-0.433946	0.666221		0.139657	-0.0457743	0.867801		-0.590255	-0.449019	0.0974204		-0.591251	-0.438106	0.688783		-0.593267	-1	1		-0.978037	-0.80256	0.0365979		-0.972235	-0.171359	0.84677		-0.972686	-1	1
		0.789273	0.394711	0.000112082		0.788524	0.0712594	0.0927687		0.794463	0.873306	-0.0941353		0.137212	-0.222804	0.0210696		0.135982	-0.439657	0.675899		0.133504	-0.055636	0.868003		-0.595226	-0.451084	0.098014		-0.596217	-0.436857	0.693584		-0.598225	-1	1		-0.979013	-0.800124	0.0359082		-0.97334	-0.174197	0.840847		-0.973776	-1	1
		0.785517	0.388876	0.00106995		0.784763	0.0711706	0.0856632		0.790751	0.870432	-0.0896302		0.131058	-0.227654	0.0207902		0.129827	-0.445307	0.684378		0.127347	-0.0654977	0.868205		-0.600173	-0.453113	0.0985697		-0.60116	-0.435658	0.698351		-0.603158	-1	1		-0.979672	-0.797651	0.0352149		-0.974406	-0.177089	0.834995		-0.974827	-1	1
		0.781731	0.383019	0.00202253		0.78097	0.0712273	0.0780084		0.787008	0.867558	-0.0849887		0.124899	-0.232493	0.0205474		0.123667	-0.450809	0.691635		0.121184	-0.0753555	0.868407		-0.605097	-0.455105	0.0990911		-0.606079	-0.434562	0.703121		-0.608068	-1	1		-0.980532	-0.795143	0.0345163		-0.975434	-0.180017	0.829229		-0.975839	-1	1
		0.777914	0.377142	0.00296246		0.777146	0.0713507	0.0698845		0.783234	0.864684	-0.0802807		0.118735	-0.237322	0.0203449		0.117502	-0.456252	0.697678		0.115017	-0.0852074	0.868604		-0.609997	-0.457059	0.0995825		-0.610974	-0.433548	0.707937		-0.612954	-1	1		-0.981461	-0.792601	0.0338124		-0.976423	-0.183035	0.823546		-0.976813	-1	1
		0.774065	0.371247	0.00388198		0.773292	0.071596	0.0613773		0.779428	0.86181	-0.075584		0.112566	-0.242142	0.0201852		0.111332	-0.461605	0.702545		0.108845	-0.0950593	0.868792		-0.614872	-0.458976	0.100048		-0.615845	-0.432587	0.712842		-0.617815	-1	1		-0.982124	-0.790025	0.0331051		-0.977374	-0.18609	0.817925		-0.977748	-1	1
		0.770187	0.365336	0.00477345		0.769407	0.0719159	0.0525723		0.775592	0.858936	-0.0709746		0.106393	-0.246956	0.0200688		0.105159	-0.46684	0.706306		0.102669	-0.104911	0.868967		-0.619724	-0.460855	0.100492		-0.620691	-0.431765	0.717871		-0.622653	-1	1		-0.98277	-0.787414	0.0323977		-0.978287	-0.189202	0.812328		-0.978644	-1	1
		0.766278	0.359412	0.0056298		0.765492	0.0722855	0.0435501		0.771726	0.855591	-0.0665145		0.100216	-0.251765	0.0199942		0.0989805	-0.472016	0.709051		0.0964884	-0.114763	0.869125		-0.624551	-0.462695	0.100914		-0.625513	-0.431	0.72305		-0.627466	-1	1		-0.98342	-0.78477	0.0316944		-0.97916	-0.192388	0.806698		-0.979502	-1	1
		0.762339	0.353478	0.00644502		0.761547	0.0727516	0.0343835		0.767829	0.852246	-0.0622435		0.0940345	-0.256568	0.019958		0.0927985	-0.477072	0.71089		0.0903043	-0.124615	0.869263		-0.629353	-0.464497	0.101313		-0.630311	-0.430319	0.728388		-0.632254	-1	1		-0.98408	-0.78209	0.0309997		-0.979996	-0.195611	0.800975		-0.980321	-1	1
		0.758369	0.347533	0.00721443		0.757572	0.073244	0.0251345		0.763901	0.848902	-0.0581747		0.0878496	-0.261364	0.0199552		0.0866128	-0.482041	0.71194		0.0841166	-0.134467	0.869377		-0.63413	-0.466263	0.101687		-0.635083	-0.429754	0.733879		-0.637017	-1	1		-0.984648	-0.779376	0.0303189		-0.980792	-0.198903	0.795089		-0.981102	-1	1
		0.75437	0.341579	0.00793475		0.753566	0.0737758	0.0158521		0.759943	0.845557	-0.0542963		0.0816612	-0.266154	0.0199801		0.0804238	-0.486951	0.712321		0.0779256	-0.144399	0.869467		-0.638883	-0.467995	0.102032		-0.63983	-0.429247	0.7395		-0.641755	-1	1		-0.985127	-0.776627	0.0296574		-0.98155	-0.202243	0.78897		-0.981843	-1	1
		0.750341	0.335615	0.00860394		0.749531	0.0743343	0.00657131		0.755955	0.842212	-0.0505772		0.0754695	-0.270937	0.020026		0.0742315	-0.491716	0.712149		0.0717316	-0.15433	0.869531		-0.64361	-0.469693	0.102344		-0.644553	-0.42886	0.745212		-0.646468	-1	1		-0.985618	-0.773845	0.0290205		-0.982268	-0.205614	0.78255		-0.982546	-1	1
		0.746282	0.329643	0.00922133		0.745467	0.0748998	-0.00268657		0.751938	0.838867	-0.0469765		0.0692749	-0.275712	0.0200866		0.0680363	-0.496423	0.711536		0.0655347	-0.164262	0.869566		-0.648312	-0.471362	0.102621		-0.649249	-0.428563	0.75096		-0.651155	-1	1		-0.986103	-0.771031	0.0284131		-0.982949	-0.209056	0.775758		-0.98321	-1	1
		0.742194	0.323664	0.00978787		0.741373	0.0754671	-0.0119138		0.74789	0.835459	-0.0434523		0.0630776	-0.28048	0.0201564		0.0618385	-0.501043	0.710587		0.0593352	-0.174194	0.869573		-0.652988	-0.473002	0.102858		-0.65392	-0.428326	0.756675		-0.655817	-1	1		-0.986532	-0.768187	0.0278389		-0.98359	-0.212526	0.768522		-0.983836	-1	1
		0.738076	0.317679	0.0103061		0.737249	0.0760194	-0.0211156		0.743813	0.832009	-0.0399691		0.0568777	-0.285238	0.0202307		0.0556382	-0.505549	0.709398		0.0531333	-0.184126	0.86955		-0.657639	-0.474616	0.103052		-0.658566	-0.428243	0.762274		-0.660452	-1	1		-0.986832	-0.765315	0.0272999		-0.984192	-0.216036	0.760773		-0.984422	-1	1
		0.73393	0.311692	0.0107799		0.733097	0.0765617	-0.0303085		0.739706	0.828558	-0.0365016		0.0506757	-0.289988	0.0203062		0.0494357	-0.509998	0.708058		0.0469293	-0.194057	0.869496		-0.662263	-0.476206	0.103202		-0.663185	-0.428224	0.767659		-0.665062	-1	1		-0.987212	-0.762417	0.026796		-0.984756	-0.219599	0.752444		-0.98497	-1	1
		0.729754	0.305705	0.0112135		0.728916	0.077057	-0.0395164		0.73557	0.825108	-0.0330365		0.0444716	-0.294727	0.0203803		0.0432312	-0.514335	0.706644		0.0407235	-0.204053	0.869413		-0.666861	-0.477773	0.103304		-0.667778	-0.4283	0.772721		-0.669646	-1	1		-0.98762	-0.759494	0.026325		-0.985281	-0.223189	0.743473		-0.985479	-1	1
		0.72555	0.299722	0.0116115		0.724706	0.0775269	-0.048765		0.731405	0.821658	-0.0295743		0.0382657	-0.299457	0.0204514		0.0370251	-0.51859	0.705216		0.0345161	-0.214091	0.869299		-0.671433	-0.479318	0.103359		-0.672345	-0.428505	0.777342		-0.674203	-1	1		-0.987812	-0.756548	0.0258823		-0.985767	-0.226833	0.733812		-0.985949	-1	1
		0.721317	0.293743	0.0119787		0.720467	0.0779586	-0.0580762		0.727212	0.818208	-0.0261325		0.0320584	-0.304177	0.0205185		0.0308175	-0.522791	0.703817		0.0283072	-0.224129	0.869156		-0.675979	-0.480842	0.103365		-0.676885	-0.428776	0.7814		-0.678733	-1	1		-0.988009	-0.753581	0.0254617		-0.986214	-0.230518	0.723429		-0.98638	-1	1
		0.717055	0.287773	0.01232		0.7162	0.0783276	-0.0674648		0.722989	0.814782	-0.0227465		0.0258498	-0.308888	0.0205815		0.0246086	-0.526862	0.70247		0.0220973	-0.234167	0.868985		-0.680498	-0.482346	0.103325		-0.681398	-0.429178	0.784773		-0.683237	-1	1		-0.988147	-0.750596	0.0250549		-0.986622	-0.234231	0.71231		-0.986773	-1	1
		0.712765	0.281812	0.0126407		0.711904	0.0786623	-0.0769347		0.718738	0.811455	-0.0194657		0.0196401	-0.313591	0.020642		0.0183988	-0.530881	0.701176		0.0158864	-0.244205	0.868786		-0.684989	-0.483831	0.103242		-0.685885	-0.429678	0.787351		-0.687714	-1	1		-0.988123	-0.747593	0.0246535		-0.986991	-0.238008	0.700469		-0.987126	-1	1
		0.708448	0.275866	0.0129451		0.707581	0.0789225	-0.0864758		0.714458	0.808128	-0.016345		0.0134297	-0.318287	0.0207035		0.0121883	-0.534825	0.699921		0.00967495	-0.254244	0.868562		-0.689454	-0.485298	0.103121		-0.690344	-0.430243	0.789032		-0.692163	-1	1		-0.988128	-0.744571	0.0242496		-0.987321	-0.24181	0.687938		-0.987441	-1	1
		0.704102	0.269935	0.0132365		0.703229	0.079117	-0.0960624		0.71015	0.8048	-0.0134351		0.00721878	-0.322976	0.0207713		0.00597727	-0.538669	0.698678		0.00346306	-0.2643	0.868317		-0.693892	-0.486744	0.10297		-0.694776	-0.430963	0.789737		-0.696585	-1	1		-0.988123	-0.741529	0.023837		-0.987612	-0.245649	0.674771		-0.987716	-1	1
		0.699728	0.26402	0.0135166		0.69885	0.0792676	-0.105653		0.705814	0.801473	-0.010777		0.00100756	-0.327657	0.0208518		-0.00023398	-0.542465	0.697415		-0.00274898	-0.274431	0.868053		-0.698302	-0.488172	0.102796		-0.699181	-0.431742	0.789406		-0.70098	-1	1		-0.988129	-0.738465	0.0234122		-0.987864	-0.249536	0.661032		-0.987953	-1	1
		0.695327	0.258122	0.013786		0.694443	0.0792914	-0.115189		0.701451	0.798146	-0.00840081		-0.00520371	-0.332331	0.0209517		-0.00644522	-0.546163	0.696101		-0.00896094	-0.284561	0.867777		-0.702685	-0.489581	0.102607		-0.703558	-0.432608	0.787999		-0.705347	-1	1		-0.988121	-0.735378	0.0229739		-0.988077	-0.253446	0.646799		-0.98815	-1	1
		0.690898	0.252242	0.0140445		0.690009	0.0792586	-0.124595		0.697059	0.794818	-0.00632976		-0.0114148	-0.336999	0.0210775		-0.0126562	-0.54979	0.694706		-0.0151726	-0.294691	0.867493		-0.70704	-0.49097	0.102413		-0.707908	-0.433585	0.785498		-0.709686	-1	1		-0.98813	-0.732262	0.0225234		-0.988251	-0.257405	0.632151		-0.988309	-1	1
		0.686442	0.246381	0.0142909		0.685547	0.0791411	-0.133784		0.69264	0.791746	-0.00458247		-0.0176254	-0.341662	0.0212343		-0.0188667	-0.553368	0.693212		-0.0213836	-0.304822	0.86721		-0.711367	-0.492341	0.102221		-0.712229	-0.434615	0.781908		-0.713997	-1	1		-0.988125	-0.729115	0.0220632		-0.988386	-0.261403	0.61717		-0.988429	-1	1
		0.681958	0.240538	0.014524		0.681059	0.0789025	-0.14266		0.688194	0.788738	-0.00317337		-0.0238353	-0.34632	0.0214248		-0.0250764	-0.556828	0.691606		-0.0275938	-0.314952	0.866936		-0.715666	-0.493695	0.102037		-0.716522	-0.43575	0.777248		-0.718279	-1	1		-0.988125	-0.725933	0.0215962		-0.988482	-0.265427	0.601937		-0.988509	-1	1
		0.677448	0.234713	0.014742		0.676543	0.0786019	-0.151127		0.683721	0.785729	-0.00211083		-0.0300443	-0.350973	0.0216487		-0.0312852	-0.56024	0.68989		-0.033803	-0.325082	0.866682		-0.719937	-0.495031	0.101868		-0.720788	-0.436956	0.771561		-0.722533	-1	1		-0.988127	-0.722715	0.0211247		-0.98854	-0.269522	0.586525		-0.988551	-1	1
		0.672912	0.228905	0.014944		0.672001	0.0781741	-0.159093		0.67922	0.782721	-0.00139452		-0.0362521	-0.355624	0.0219026		-0.0374927	-0.56358	0.688073		-0.0400108	-0.335229	0.866461		-0.724179	-0.49635	0.101717		-0.725024	-0.438211	0.764907		-0.726759	-1	1		-0.987882	-0.719458	0.0206501		-0.988558	-0.273648	0.571002		-0.988553	-1	1
		0.668348	0.223112	0.0151296		0.667432	0.0776464	-0.166478		0.674693	0.779713	-0.00101217		-0.0424584	-0.360272	0.0221806		-0.0436987	-0.566821	0.686177		-0.0462171	-0.345379	0.866287		-0.728393	-0.497651	0.101588		-0.729232	-0.439577	0.757367		-0.730956	-1	1		-0.987719	-0.716162	0.0201731		-0.988537	-0.277819	0.555427		-0.988516	-1	1
		0.663758	0.217335	0.0152999		0.662837	0.0770522	-0.173218		0.67014	0.776704	-0.000936393		-0.0486631	-0.364918	0.0224756		-0.049903	-0.57001	0.68423		-0.0524216	-0.35553	0.866178		-0.732578	-0.498935	0.10148		-0.733411	-0.440984	0.749041		-0.735124	-1	1		-0.987435	-0.712825	0.0196934		-0.988477	-0.282052	0.539851		-0.988441	-1	1
		0.659142	0.211573	0.0154566		0.658216	0.076284	-0.179268		0.665559	0.773907	-0.00112446		-0.0548659	-0.369561	0.0227793		-0.0561054	-0.573094	0.68227		-0.058624	-0.365681	0.866152		-0.736734	-0.500202	0.101397		-0.737561	-0.442454	0.740044		-0.739263	-1	1		-0.986984	-0.709449	0.0192108		-0.988378	-0.286316	0.524312		-0.988326	-1	1
		0.6545	0.205826	0.015603		0.653569	0.0754432	-0.184608		0.660953	0.771426	-0.00152148		-0.0610664	-0.374201	0.0230837		-0.0623055	-0.576092	0.68034		-0.0648242	-0.375831	0.866231		-0.740861	-0.501451	0.101338		-0.741683	-0.444002	0.730497		-0.743373	-1	1		-0.986811	-0.706037	0.0187246		-0.988239	-0.290642	0.508835		-0.988172	-1	1
		0.649832	0.200096	0.0157427		0.648896	0.0744937	-0.189232		0.65632	0.768946	-0.00206539		-0.0672646	-0.37884	0.0233812		-0.0685032	-0.579032	0.678491		-0.0710218	-0.385982	0.866439		-0.744958	-0.502683	0.101301		-0.745774	-0.44559	0.720525		-0.747454	-1	1		-0.986366	-0.702591	0.0182344		-0.988062	-0.295015	0.493432		-0.987978	-1	1
		0.645139	0.194381	0.0158803		0.644197	0.0733951	-0.193154		0.651662	0.766465	-0.00269243		-0.0734602	-0.383477	0.0236652		-0.0746981	-0.581815	0.676778		-0.0772167	-0.396082	0.866801		-0.749027	-0.5039	0.101284		-0.749837	-0.447253	0.710247		-0.751505	-1	1		-0.985779	-0.699115	0.0177397		-0.987846	-0.299419	0.478101		-0.987746	-1	1
		0.64042	0.188682	0.0160204		0.639473	0.072222	-0.196402		0.646978	0.763984	-0.00334058		-0.0796528	-0.388111	0.0239304		-0.0808902	-0.58453	0.675259		-0.0834085	-0.406107	0.867347		-0.753065	-0.5051	0.101285		-0.75387	-0.448974	0.699773		-0.755526	-1	1		-0.985324	-0.695613	0.0172403		-0.987591	-0.303899	0.462831		-0.987475	-1	1
		0.635676	0.182997	0.0161669		0.634724	0.0708999	-0.199015		0.642268	0.761504	-0.00395013		-0.0858423	-0.392745	0.0241726		-0.087079	-0.587142	0.67399		-0.089597	-0.416131	0.868105		-0.757074	-0.506284	0.101301		-0.757873	-0.450732	0.689202		-0.759518	-1	1		-0.984837	-0.69209	0.0167357		-0.987297	-0.308411	0.447603		-0.987164	-1	1
		0.630906	0.177327	0.0163229		0.629949	0.0694692	-0.201043		0.637533	0.759023	-0.00446332		-0.0920284	-0.397377	0.0243885		-0.0932644	-0.589607	0.673022		-0.0957821	-0.426156	0.869108		-0.761053	-0.50745	0.10133		-0.761846	-0.452586	0.678623		-0.76348	-1	1		-0.984303	-0.688552	0.0162253		-0.986964	-0.312969	0.432398		-0.986815	-1	1
		0.626112	0.17167	0.0164906		0.62515	0.0679661	-0.202547		0.632773	0.757137	-0.00482397		-0.0982108	-0.40201	0.0245757		-0.0994461	-0.591997	0.672398		-0.101963	-0.436181	0.870389		-0.765002	-0.508593	0.10137		-0.765789	-0.45448	0.668111		-0.767412	-1	1		-0.983551	-0.685005	0.0157084		-0.986592	-0.31759	0.417199		-0.986426	-1	1
		0.621293	0.166026	0.0166707		0.620326	0.0662913	-0.203596		0.627987	0.755252	-0.00497721		-0.104389	-0.406644	0.0247326		-0.105624	-0.594232	0.672152		-0.108141	-0.446205	0.87198		-0.768921	-0.509712	0.10142		-0.769701	-0.456434	0.657737		-0.771313	-1	1		-0.982953	-0.681453	0.0151834		-0.986181	-0.322243	0.402		-0.985999	-1	1
		0.61645	0.160394	0.0168628		0.615478	0.0645521	-0.204261		0.623177	0.753366	-0.00486924		-0.110564	-0.411278	0.0248584		-0.111797	-0.596347	0.672309		-0.114314	-0.45623	0.873915		-0.77281	-0.510802	0.101479		-0.773584	-0.458471	0.647557		-0.775184	-1	1		-0.982356	-0.677901	0.0146493		-0.985731	-0.326958	0.386805		-0.985532	-1	1
		0.611582	0.154774	0.0170649		0.610605	0.0627164	-0.204615		0.618342	0.75148	-0.00444727		-0.116734	-0.415912	0.0249539		-0.117967	-0.598382	0.672882		-0.120482	-0.465968	0.876226		-0.776668	-0.511861	0.101547		-0.777436	-0.46055	0.637621		-0.779025	-1	1		-0.981556	-0.674352	0.0141052		-0.985242	-0.331719	0.371636		-0.985027	-1	1
		0.60669	0.149163	0.0172734		0.605708	0.0607589	-0.204728		0.613483	0.749595	-0.00365961		-0.122899	-0.420547	0.025021		-0.124131	-0.60021	0.673881		-0.126646	-0.475705	0.878941		-0.780495	-0.512888	0.101623		-0.781257	-0.462715	0.627962		-0.782835	-1	1		-0.980872	-0.670811	0.0135514		-0.984715	-0.336511	0.356526		-0.984483	-1	1
		0.601774	0.143561	0.0174832		0.600788	0.0587417	-0.20466		0.608599	0.747709	-0.00245594		-0.12906	-0.425183	0.0250626		-0.130291	-0.601955	0.675309		-0.132805	-0.485443	0.882086		-0.784292	-0.513879	0.101707		-0.785047	-0.464939	0.618598		-0.786613	-1	1		-0.980122	-0.66728	0.0129896		-0.984148	-0.341373	0.341523		-0.983899	-1	1
		0.596834	0.137968	0.0176879		0.595843	0.056607	-0.20446		0.603691	0.746031	-0.000787801		-0.135216	-0.429822	0.0250817		-0.136445	-0.603573	0.67717		-0.138959	-0.495181	0.88568		-0.788057	-0.514834	0.1018		-0.788807	-0.467204	0.609532		-0.790361	-1	1		-0.979321	-0.663763	0.012423		-0.983543	-0.346261	0.326685		-0.983278	-1	1
		0.591871	0.132384	0.0178794		0.590875	0.0543851	-0.204162		0.59876	0.744491	0.00139054		-0.141366	-0.434466	0.0250812		-0.142594	-0.605023	0.679464		-0.145107	-0.504919	0.889735		-0.791792	-0.515752	0.101902		-0.792535	-0.469558	0.60075		-0.794078	-1	1		-0.978461	-0.660262	0.0118552		-0.982899	-0.351187	0.312076		-0.982617	-1	1
		0.586884	0.126812	0.0180482		0.585884	0.052105	-0.203786		0.593804	0.742952	0.00412049		-0.14751	-0.439116	0.0250629		-0.148738	-0.606389	0.682193		-0.151249	-0.514657	0.894254		-0.795495	-0.516633	0.102015		-0.796232	-0.471939	0.592228		-0.797764	-1	1		-0.97751	-0.656779	0.0112902		-0.982215	-0.356158	0.297767		-0.981917	-1	1
		0.581874	0.121253	0.0181846		0.58087	0.049679	-0.203339		0.588825	0.741412	0.00743746		-0.153649	-0.443776	0.0250268		-0.154875	-0.607585	0.685356		-0.157386	-0.524142	0.899227		-0.799167	-0.517478	0.102138		-0.799897	-0.474364	0.583941		-0.801418	-1	1		-0.976568	-0.653317	0.0107309		-0.981494	-0.361148	0.283831		-0.981179	-1	1
		0.576842	0.115709	0.0182788		0.575832	0.047194	-0.202828		0.583823	0.739872	0.0113711		-0.159782	-0.44845	0.0249713		-0.161007	-0.608656	0.68895		-0.163516	-0.533458	0.904629		-0.802807	-0.518288	0.102267		-0.803531	-0.47683	0.575869		-0.80504	-1	1		-0.975588	-0.649875	0.010179		-0.980733	-0.366172	0.270339		-0.980402	-1	1
		0.571786	0.110179	0.0183222		0.570772	0.0446206	-0.202254		0.578797	0.738333	0.0159488		-0.165908	-0.45314	0.0248931		-0.167132	-0.609642	0.692965		-0.16964	-0.542775	0.910416		-0.806415	-0.519063	0.1024		-0.807133	-0.479315	0.568004		-0.808631	-1	1		-0.974602	-0.646452	0.00963437		-0.979934	-0.371211	0.257361		-0.979587	-1	1
		0.566708	0.104665	0.0183075		0.56569	0.041929	-0.201624		0.573749	0.736746	0.0212013		-0.172028	-0.457849	0.0247886		-0.173251	-0.610416	0.697386		-0.175757	-0.552091	0.916525		-0.809992	-0.519806	0.102531		-0.810704	-0.481829	0.560353		-0.812189	-1	1		-0.973594	-0.64305	0.00909579		-0.979096	-0.376259	0.244963		-0.978732	-1	1
		0.561607	0.0991672	0.0182294		0.560585	0.039179	-0.20095		0.568678	0.73497	0.0271706		-0.178141	-0.462578	0.0246556		-0.179362	-0.611104	0.702186		-0.181867	-0.561408	0.922867		-0.813537	-0.520516	0.102657		-0.814242	-0.484357	0.552941		-0.815716	-1	1		-0.97244	-0.639668	0.00856137		-0.978219	-0.381316	0.233204		-0.97784	-1	1
		0.556485	0.0936868	0.0180848		0.555458	0.0363134	-0.200244		0.563584	0.733194	0.0339116		-0.184247	-0.467327	0.024494		-0.185467	-0.611664	0.707327		-0.18797	-0.570724	0.929331		-0.817049	-0.521192	0.102773		-0.817748	-0.486894	0.545807		-0.81921	-1	1		-0.971265	-0.636305	0.00802897		-0.977304	-0.38637	0.222134		-0.976908	-1	1
		0.55134	0.0882252	0.0178727		0.550309	0.0333653	-0.19952		0.558469	0.731418	0.0414866		-0.190346	-0.472093	0.0243067		-0.191564	-0.612052	0.712755		-0.194066	-0.579932	0.935797		-0.82053	-0.521836	0.102876		-0.821222	-0.489442	0.539		-0.822672	-1	1		-0.970184	-0.63296	0.00749672		-0.97635	-0.39142	0.21179		-0.975938	-1	1
		0.546174	0.0827827	0.0175946		0.545138	0.0303623	-0.19879		0.553331	0.729642	0.0499554		-0.196437	-0.476873	0.0240996		-0.197654	-0.612355	0.718403		-0.200154	-0.588703	0.942139		-0.823978	-0.522448	0.102964		-0.824663	-0.49199	0.532568		-0.826102	-1	1		-0.968868	-0.629629	0.00696338		-0.975358	-0.396455	0.202193		-0.97493	-1	1
		0.540986	0.0773581	0.0172532		0.539946	0.02723	-0.198065		0.548171	0.727867	0.0593623		-0.202521	-0.481663	0.0238818		-0.203736	-0.612489	0.724185		-0.206234	-0.597474	0.948248		-0.827393	-0.523029	0.103037		-0.828072	-0.494538	0.526558		-0.829498	-1	1		-0.967595	-0.626308	0.00642849		-0.974327	-0.401481	0.193349		-0.973883	-1	1
		0.535777	0.0719489	0.016852		0.534732	0.0240492	-0.197358		0.54299	0.726091	0.0697265		-0.208596	-0.486457	0.0236642		-0.20981	-0.612496	0.730004		-0.212306	-0.606244	0.954036		-0.830776	-0.52358	0.103097		-0.831448	-0.49708	0.52101		-0.832862	-1	1		-0.966455	-0.622992	0.00589192		-0.973257	-0.406483	0.185249		-0.972797	-1	1
		0.530546	0.0665527	0.0163947		0.529497	0.0207958	-0.196678		0.537787	0.723507	0.0810357		-0.214664	-0.491253	0.0234587		-0.215875	-0.61242	0.735751		-0.21837	-0.615015	0.959439		-0.834126	-0.524103	0.103143		-0.834792	-0.499618	0.51596		-0.836193	-1	1		-0.965037	-0.619677	0.00535336		-0.97215	-0.411464	0.177873		-0.971673	-1	1
		0.525295	0.0611656	0.0158851		0.524242	0.0174548	-0.196038		0.532563	0.720723	0.093241		-0.220723	-0.496049	0.0232763		-0.221932	-0.612138	0.741308		-0.224425	-0.623786	0.964413		-0.837443	-0.524599	0.10318		-0.838102	-0.502145	0.511436		-0.839491	-1	1		-0.963609	-0.616353	0.00481191		-0.971004	-0.41643	0.171192		-0.970511	-1	1
		0.520023	0.0557837	0.0153271		0.518966	0.0140735	-0.195447		0.527318	0.717938	0.106252		-0.226773	-0.500843	0.0231271		-0.227981	-0.611775	0.746557		-0.230471	-0.632557	0.968934		-0.840727	-0.525069	0.103209		-0.84138	-0.504661	0.50746		-0.842755	-1	1		-0.962299	-0.613016	0.00426609		-0.969819	-0.421355	0.165171		-0.969311	-1	1
		0.51473	0.0504032	0.014725		0.513669	0.010619	-0.194916		0.522052	0.715153	0.11993		-0.232814	-0.505633	0.0230189		-0.23402	-0.611288	0.751386		-0.236508	-0.640819	0.972991		-0.843978	-0.525512	0.103232		-0.844624	-0.507171	0.504049		-0.845987	-1	1		-0.960911	-0.609657	0.00371405		-0.968596	-0.426261	0.159777		-0.968072	-1	1
		0.509417	0.0450199	0.014083		0.508352	0.00712239	-0.194456		0.516765	0.712368	0.134085		-0.238846	-0.510418	0.0229579		-0.24005	-0.610639	0.75569		-0.242536	-0.648953	0.976588		-0.847195	-0.525926	0.103247		-0.847834	-0.50966	0.501207		-0.849184	-1	1		-0.959365	-0.606271	0.00315371		-0.967335	-0.431142	0.154973		-0.966794	-1	1
		0.504084	0.0396293	0.0134059		0.503015	0.0035977	-0.194073		0.511458	0.709583	0.148476		-0.244868	-0.515195	0.022948		-0.246071	-0.609909	0.759384		-0.248554	-0.657087	0.979736		-0.850379	-0.526308	0.103255		-0.851012	-0.51214	0.498932		-0.852349	-1	1		-0.957838	-0.602851	0.00258284		-0.966036	-0.435986	0.150729		-0.965479	-1	1
		0.498731	0.0342287	0.0126988		0.497658	2.33e-05	-0.193771		0.506131	0.70609	0.162832		-0.250881	-0.519967	0.0229912		-0.252082	-0.609019	0.762399		-0.254563	-0.665221	0.982454		-0.853529	-0.526655	0.103253		-0.854156	-0.514606	0.497209		-0.855479	-1	1		-0.956269	-0.599391	0.00199923		-0.964699	-0.440813	0.147021		-0.964125	-1	1
		0.493358	0.0288175	0.0119671		0.492281	-0.0035639	-0.193546		0.500784	0.701534	0.176879		-0.256884	-0.524733	0.0230876		-0.258083	-0.608011	0.764694		-0.260561	-0.673355	0.984769		-0.856646	-0.526964	0.103239		-0.857266	-0.517047	0.49601		-0.858576	-1	1		-0.954577	-0.595885	0.00140084		-0.963323	-0.445605	0.143832		-0.962733	-1	1
		0.487966	0.0233963	0.011216		0.486885	-0.00717045	-0.193381		0.495417	0.696979	0.190363		-0.262877	-0.529493	0.0232354		-0.264073	-0.606925	0.766252		-0.266549	-0.68149	0.986708		-0.859729	-0.527233	0.103214		-0.860342	-0.519474	0.495297		-0.861639	-1	1		-0.953005	-0.592329	0.000785953		-0.96191	-0.450374	0.141148		-0.961303	-1	1
		0.482554	0.0179671	0.01045		0.48147	-0.0107903	-0.193252		0.49003	0.692424	0.203074		-0.268859	-0.534249	0.0234307		-0.270054	-0.605651	0.767083		-0.272527	-0.689363	0.988305		-0.862778	-0.527461	0.103177		-0.863384	-0.521865	0.49502		-0.864668	-1	1		-0.951335	-0.588715	0.000152888		-0.960458	-0.455127	0.138959		-0.959835	-1	1
		0.477124	0.0125308	0.00967208		0.476036	-0.0144137	-0.193123		0.484624	0.687869	0.214843		-0.274831	-0.539	0.0236681		-0.276023	-0.604304	0.767224		-0.278494	-0.696845	0.989591		-0.865793	-0.527647	0.103129		-0.866392	-0.52422	0.495126		-0.867663	-1	1		-0.949619	-0.585041	-0.000500507		-0.958969	-0.459846	0.137256		-0.958328	-1	1
		0.471675	0.0070871	0.00888315		0.470582	-0.0180383	-0.192952		0.479199	0.683313	0.225535		-0.280792	-0.543745	0.0239403		-0.281982	-0.60285	0.766735		-0.28445	-0.704328	0.9906		-0.868774	-0.527792	0.10307		-0.869366	-0.52655	0.495561		-0.870624	-1	1		-0.947962	-0.581298	-0.00117725		-0.957442	-0.464552	0.136027		-0.956784	-1	1
		0.466207	0.00163555	0.00808232		0.465111	-0.0216545	-0.192697		0.473755	0.678758	0.235051		-0.286742	-0.548481	0.0242393		-0.28793	-0.60126	0.765701		-0.290395	-0.71181	0.991366		-0.87172	-0.527897	0.102998		-0.872305	-0.528802	0.496279		-0.87355	-1	1		-0.946131	-0.577484	-0.00188128		-0.955877	-0.469237	0.135263		-0.955202	-1	1
		0.46072	-0.00382404	0.00726729		0.459621	-0.0252652	-0.192313		0.468292	0.671848	0.24333		-0.29268	-0.553203	0.0245569		-0.293866	-0.599605	0.764223		-0.296329	-0.719293	0.991918		-0.874632	-0.527965	0.102912		-0.875211	-0.531015	0.497247		-0.876442	-1	1		-0.944266	-0.573593	-0.0026171		-0.954274	-0.47389	0.13495		-0.953582	-1	1
		0.455216	-0.00929069	0.00643481		0.454113	-0.028847	-0.191763		0.462811	0.664937	0.250362		-0.298607	-0.557908	0.0248852		-0.299791	-0.597823	0.762417		-0.302251	-0.726775	0.992288		-0.87751	-0.528	0.102808		-0.878081	-0.533171	0.498451		-0.8793	-1	1		-0.942449	-0.569624	-0.00338925		-0.952634	-0.478525	0.135076		-0.951925	-1	1
		0.449693	-0.0147637	0.0055812		0.448587	-0.0324119	-0.191009		0.457311	0.658027	0.25619		-0.304523	-0.562591	0.0252178		-0.305703	-0.595952	0.760408		-0.308161	-0.734258	0.992504		-0.880353	-0.528005	0.102684		-0.880917	-0.535239	0.499894		-0.882123	-1	1		-0.940542	-0.565576	-0.00420174		-0.950956	-0.483119	0.135625		-0.950229	-1	1
		0.444153	-0.020244	0.00470292		0.443043	-0.0359516	-0.190018		0.451793	0.651117	0.260907		-0.310426	-0.567249	0.0255495		-0.311604	-0.59402	0.758326		-0.314059	-0.741136	0.992592		-0.883161	-0.527981	0.102535		-0.883718	-0.537261	0.501594		-0.884911	-1	1		-0.9386	-0.561448	-0.00505751		-0.94924	-0.487677	0.136581		-0.948497	-1	1
		0.438595	-0.0257323	0.00379714		0.437482	-0.0394495	-0.188764		0.446257	0.644206	0.264641		-0.316317	-0.571879	0.0258771		-0.317493	-0.591947	0.756291		-0.319944	-0.748014	0.992575		-0.885934	-0.527931	0.10236		-0.886484	-0.539184	0.50358		-0.887664	-1	1		-0.936709	-0.557244	-0.00595789		-0.947487	-0.492212	0.137924		-0.946726	-1	1
		0.43302	-0.0312287	0.00286221		0.431903	-0.0429247	-0.187226		0.440704	0.637296	0.26753		-0.322195	-0.576479	0.0261988		-0.323368	-0.589819	0.754415		-0.325817	-0.754892	0.992474		-0.888672	-0.527855	0.102157		-0.889216	-0.541026	0.505885		-0.890382	-1	1		-0.934695	-0.552966	-0.00690217		-0.945697	-0.496678	0.139626		-0.944919	-1	1
		0.427428	-0.0367328	0.00189792		0.426307	-0.0463512	-0.185394		0.435133	0.628791	0.269711		-0.328061	-0.581049	0.0265139		-0.329232	-0.587612	0.752788		-0.331677	-0.76177	0.992309		-0.891375	-0.527754	0.101922		-0.891912	-0.542815	0.508541		-0.893065	-1	1		-0.932582	-0.548619	-0.00788758		-0.943869	-0.501114	0.141646		-0.943074	-1	1
		0.421819	-0.0422428	0.000905343		0.420695	-0.0497365	-0.183269		0.429544	0.619225	0.271312		-0.333914	-0.585587	0.0268222		-0.335082	-0.585301	0.751476		-0.337524	-0.768649	0.992096		-0.894043	-0.527625	0.101657		-0.894573	-0.544461	0.511571		-0.895712	-1	1		-0.930549	-0.544209	-0.00891001		-0.942004	-0.505506	0.14393		-0.941192	-1	1
		0.416193	-0.0477558	-0.000113097		0.415066	-0.0530945	-0.180865		0.423939	0.609658	0.272453		-0.339753	-0.590094	0.027123		-0.340919	-0.58294	0.750522		-0.343358	-0.775527	0.991849		-0.896676	-0.527466	0.101359		-0.897198	-0.546047	0.514993		-0.898325	-1	1		-0.928406	-0.539741	-0.00996488		-0.940102	-0.509833	0.146407		-0.939272	-1	1
		0.410551	-0.0532677	-0.00115336		0.40942	-0.0563778	-0.178206		0.418317	0.600091	0.273241		-0.34558	-0.59457	0.0274149		-0.346742	-0.580481	0.749941		-0.349178	-0.782067	0.99158		-0.899273	-0.527275	0.101027		-0.899789	-0.547543	0.518811		-0.900902	-1	1		-0.926187	-0.53522	-0.0110478		-0.938162	-0.514127	0.148991		-0.937316	-1	1
		0.404893	-0.0587751	-0.00220981		0.403759	-0.0596303	-0.175327		0.412678	0.590524	0.273776		-0.351392	-0.599016	0.0276958		-0.352552	-0.577952	0.749726		-0.354985	-0.788381	0.9913		-0.901835	-0.52705	0.10066		-0.902343	-0.548914	0.523013		-0.903443	-1	1		-0.924099	-0.530655	-0.0121547		-0.936186	-0.51835	0.15159		-0.935322	-1	1
		0.399218	-0.0642766	-0.00327557		0.398081	-0.0628363	-0.172275		0.407023	0.580957	0.274149		-0.357191	-0.603435	0.0279619		-0.358348	-0.575377	0.74985		-0.360777	-0.794696	0.991017		-0.904361	-0.52679	0.100255		-0.904862	-0.550222	0.527575		-0.905949	-1	1		-0.921874	-0.526053	-0.0132819		-0.934173	-0.522516	0.15411		-0.933292	-1	1
		0.393528	-0.0697711	-0.00434265		0.392388	-0.0659814	-0.169105		0.401351	0.570861	0.274437		-0.362975	-0.607826	0.0282091		-0.36413	-0.572696	0.750273		-0.366555	-0.80101	0.990739		-0.906852	-0.526492	0.0998113		-0.907346	-0.551402	0.532458		-0.908419	-0.999995	1		-0.919539	-0.521421	-0.0144263		-0.932122	-0.526644	0.156466		-0.931225	-1	1
		0.387822	-0.0752583	-0.00540176		0.386679	-0.0690969	-0.165875		0.395664	0.558652	0.274709		-0.368746	-0.61219	0.0284326		-0.369897	-0.569976	0.750946		-0.372319	-0.807324	0.990469		-0.909307	-0.526154	0.0993264		-0.909793	-0.552485	0.537612		-0.910853	-0.999989	1		-0.917325	-0.516766	-0.0155855		-0.930035	-0.53067	0.158583		-0.929121	-1	1
		0.382101	-0.0807384	-0.00644228		0.380955	-0.0721547	-0.16265		0.389961	0.546443	0.275022		-0.374501	-0.616525	0.0286288		-0.37565	-0.567201	0.751823		-0.378068	-0.813639	0.990213		-0.911725	-0.525774	0.0988		-0.912205	-0.553503	0.542974		-0.91325	-0.999983	1		-0.914972	-0.512095	-0.016758		-0.927912	-0.534654	0.160398		-0.92698	-1	1
		0.376365	-0.0862121	-0.00745257		0.375216	-0.0751727	-0.159489		0.384243	0.534233	0.275424		-0.380242	-0.620828	0.0287946		-0.381388	-0.56436	0.752854		-0.383802	-0.819837	0.989974		-0.914108	-0.525352	0.0982344		-0.91458	-0.554357	0.548467		-0.915612	-0.999977	1		-0.912571	-0.507411	-0.0179427		-0.925751	-0.538573	0.161865		-0.924803	-1	1
		0.370614	-0.0916797	-0.00842082		0.369463	-0.0781641	-0.156444		0.378509	0.522024	0.275949		-0.385968	-0.625097	0.0289287		-0.38711	-0.56149	0.754		-0.389521	-0.825571	0.989753		-0.916455	-0.524888	0.0976354		-0.91692	-0.555142	0.554002		-0.917938	-0.999971	1		-0.910268	-0.502717	-0.0191389		-0.923554	-0.542404	0.162949		-0.922589	-1	1
		0.364849	-0.0971422	-0.00933642		0.363694	-0.0810924	-0.153556		0.37276	0.509814	0.276621		-0.391679	-0.629329	0.0290306		-0.392818	-0.558565	0.755221		-0.395225	-0.831305	0.989551		-0.918765	-0.524384	0.0970109		-0.919223	-0.555827	0.55948		-0.920227	-0.999965	1		-0.907816	-0.498014	-0.0203464		-0.921321	-0.54619	0.163627		-0.920338	-1	1
		0.359069	-0.1026	-0.0101916		0.357911	-0.0839956	-0.150855		0.366997	0.497605	0.277453		-0.397374	-0.633522	0.0291006		-0.39851	-0.555607	0.756487		-0.400913	-0.837039	0.98937		-0.92104	-0.52384	0.0963702		-0.92149	-0.556372	0.564798		-0.92248	-0.9999	1		-0.905322	-0.493301	-0.0215654		-0.919051	-0.549881	0.163882		-0.918052	-1	1
		0.353275	-0.108055	-0.0109826		0.352114	-0.086861	-0.148359		0.361219	0.483493	0.278448		-0.403053	-0.637673	0.0291397		-0.404186	-0.552626	0.75777		-0.406585	-0.842773	0.989209		-0.923278	-0.52326	0.0957222		-0.923721	-0.556847	0.569857		-0.924696	-0.999748	1		-0.902817	-0.488582	-0.0227965		-0.916745	-0.553498	0.163711		-0.915729	-1	1
		0.347467	-0.113506	-0.0117102		0.346304	-0.0896745	-0.146077		0.355427	0.468907	0.279607		-0.408717	-0.641783	0.0291489		-0.409847	-0.549601	0.75905		-0.412241	-0.848507	0.989068		-0.925479	-0.522645	0.0950744		-0.925915	-0.557179	0.57457		-0.926875	-0.999595	1		-0.900239	-0.483855	-0.0240406		-0.914403	-0.557066	0.163116		-0.913369	-1	0.999999
		0.341645	-0.118954	-0.0123788		0.340479	-0.0924619	-0.144004		0.34962	0.45432	0.280943		-0.414364	-0.64585	0.0291298		-0.415491	-0.546563	0.760315		-0.417881	-0.854242	0.988946		-0.927644	-0.521997	0.0944324		-0.928073	-0.557402	0.578865		-0.929018	-0.999443	1		-0.897603	-0.479122	-0.0252986		-0.912025	-0.560505	0.162117		-0.910974	-1	0.999999
		0.33581	-0.124398	-0.012996		0.334641	-0.0951967	-0.142127		0.3438	0.439734	0.282488		-0.419995	-0.649874	0.0290836		-0.421119	-0.543504	0.761557		-0.423504	-0.859475	0.988842		-0.929772	-0.521318	0.0937992		-0.930194	-0.557553	0.582694		-0.931124	-0.99929	1		-0.894989	-0.474385	-0.0265707		-0.90961	-0.563891	0.160747		-0.908543	-1	0.999999
		0.329961	-0.129839	-0.0135711		0.32879	-0.0978931	-0.140419		0.337966	0.425147	0.284303		-0.42561	-0.653856	0.0290116		-0.42673	-0.540425	0.762774		-0.429111	-0.864583	0.988755		-0.931864	-0.52061	0.0931752		-0.932278	-0.557515	0.586033		-0.933194	-0.999138	1		-0.892426	-0.469644	-0.027856		-0.90716	-0.567199	0.159056		-0.906075	-1	0.999999
		0.3241	-0.135279	-0.0141144		0.322926	-0.100564	-0.138841		0.332119	0.41056	0.286471		-0.431208	-0.657795	0.0289157		-0.432324	-0.537339	0.763963		-0.434701	-0.869692	0.988682		-0.933919	-0.519875	0.0925586		-0.934325	-0.557399	0.588877		-0.935226	-0.998986	1		-0.889703	-0.464902	-0.0291516		-0.904674	-0.570399	0.157105		-0.903572	-1	0.999999
		0.318225	-0.140719	-0.014637		0.317049	-0.103174	-0.137344		0.326258	0.395198	0.289085		-0.436788	-0.661691	0.0287985		-0.437901	-0.534239	0.765124		-0.440274	-0.8748	0.988624		-0.935937	-0.519115	0.0919453		-0.936336	-0.557167	0.591243		-0.937222	-0.998923	1		-0.886945	-0.460156	-0.0304529		-0.902152	-0.573546	0.154959		-0.901032	-1	0.999999
		0.312338	-0.146163	-0.0151499		0.31116	-0.105762	-0.13587		0.320385	0.378672	0.292235		-0.442352	-0.665545	0.0286633		-0.443461	-0.531135	0.766252		-0.445829	-0.879908	0.988578		-0.937918	-0.518333	0.0913281		-0.938309	-0.556775	0.593159		-0.93918	-0.99886	1		-0.884202	-0.455406	-0.0317531		-0.899595	-0.576586	0.152678		-0.898457	-1	0.999999
		0.306439	-0.151612	-0.0156629		0.305258	-0.108315	-0.134353		0.314499	0.362146	0.296009		-0.447898	-0.66936	0.0285148		-0.449004	-0.528028	0.767337		-0.451367	-0.885016	0.988542		-0.939862	-0.517531	0.0906971		-0.940246	-0.556302	0.59466		-0.941102	-0.998798	1		-0.881418	-0.450653	-0.0330439		-0.897002	-0.579548	0.150307		-0.895847	-1	0.999999
		0.300528	-0.157068	-0.0161845		0.299344	-0.110828	-0.132727		0.3086	0.345619	0.300483		-0.453426	-0.673135	0.0283581		-0.454529	-0.524917	0.768362		-0.456887	-0.889864	0.988517		-0.941768	-0.516713	0.0900403		-0.942145	-0.555667	0.595782		-0.942986	-0.998735	1		-0.878607	-0.445896	-0.034317		-0.894374	-0.582456	0.147873		-0.893201	-1	0.999999
		0.294605	-0.162535	-0.0167212		0.293419	-0.11332	-0.130923		0.302689	0.329093	0.305725		-0.458936	-0.676872	0.0281985		-0.460035	-0.521804	0.769302		-0.46239	-0.894319	0.988499		-0.943638	-0.515882	0.0893439		-0.944007	-0.554909	0.596564		-0.944833	-0.998673	1		-0.875683	-0.441135	-0.0355647		-0.89171	-0.585237	0.145385		-0.890519	-1	1
		0.28867	-0.168015	-0.0172775		0.287481	-0.115775	-0.128877		0.296766	0.312567	0.311788		-0.464429	-0.680571	0.0280413		-0.465524	-0.518689	0.770129		-0.467874	-0.898775	0.988489		-0.94547	-0.515038	0.0885927		-0.945832	-0.55407	0.597045		-0.946643	-0.99861	1		-0.87281	-0.436372	-0.0367811		-0.889011	-0.587969	0.142832		-0.887802	-1	1
		0.282724	-0.173507	-0.0178561		0.281533	-0.118205	-0.12653		0.290832	0.296041	0.31871		-0.469903	-0.684235	0.0278915		-0.470994	-0.515571	0.770809		-0.473339	-0.903231	0.988484		-0.947266	-0.514183	0.0877717		-0.94762	-0.553025	0.597263		-0.948415	-0.998603	1		-0.869843	-0.431608	-0.0379621		-0.886277	-0.590627	0.140192		-0.88505	-1	1
		0.276766	-0.179011	-0.0184582		0.275573	-0.120618	-0.123829		0.284885	0.278089	0.326511		-0.475358	-0.68786	0.0277538		-0.476446	-0.512452	0.771307		-0.478786	-0.907687	0.988484		-0.949023	-0.513317	0.0868661		-0.94937	-0.551899	0.597253		-0.95015	-0.998632	1		-0.866731	-0.426842	-0.0391047		-0.883508	-0.59319	0.137436		-0.882262	-1	1
		0.270798	-0.184527	-0.0190836		0.269603	-0.12299	-0.120731		0.278928	0.260137	0.335184		-0.480795	-0.691448	0.0276322		-0.481879	-0.509331	0.771589		-0.484214	-0.912143	0.988488		-0.950743	-0.512439	0.0858627		-0.951083	-0.550649	0.597046		-0.951847	-0.998662	1		-0.863856	-0.422077	-0.0402076		-0.880705	-0.595705	0.134533		-0.87944	-1	1
		0.264819	-0.190051	-0.0197305		0.263622	-0.125347	-0.1172		0.272959	0.242185	0.344694		-0.486212	-0.694999	0.0275301		-0.487292	-0.506211	0.771618		-0.489624	-0.916598	0.988495		-0.952426	-0.51155	0.0847513		-0.952758	-0.549233	0.596666		-0.953507	-0.998691	1		-0.860889	-0.417312	-0.0412697		-0.877866	-0.598128	0.131446		-0.876583	-1	1
		0.258829	-0.195584	-0.0203949		0.25763	-0.127682	-0.113207		0.266979	0.224233	0.354975		-0.491611	-0.698513	0.0274505		-0.492687	-0.503092	0.771358		-0.495013	-0.920405	0.988504		-0.954071	-0.51065	0.0835258		-0.954396	-0.547733	0.596127		-0.955129	-0.99872	1		-0.857729	-0.412548	-0.0422901		-0.874993	-0.600483	0.128141		-0.873692	-1	1
		0.25283	-0.201125	-0.0210722		0.251629	-0.129992	-0.108722		0.260989	0.206281	0.365917		-0.49699	-0.701989	0.0273952		-0.498062	-0.499979	0.770776		-0.500384	-0.924211	0.988514		-0.955679	-0.509738	0.0821861		-0.955996	-0.546065	0.595436		-0.956714	-0.99875	1		-0.854658	-0.407784	-0.0432673		-0.872085	-0.602793	0.124585		-0.870765	-1	1
		0.24682	-0.206675	-0.0217573		0.245617	-0.132291	-0.103721		0.254988	0.188329	0.377375		-0.502349	-0.705426	0.0273656		-0.503418	-0.496869	0.769845		-0.505734	-0.928017	0.988526		-0.957248	-0.508815	0.0807381		-0.957558	-0.54427	0.594588		-0.958261	-0.998798	1		-0.851537	-0.403019	-0.0441993		-0.869143	-0.604993	0.120746		-0.867805	-1	1
		0.240801	-0.212232	-0.0224467		0.239596	-0.134574	-0.0981742		0.248977	0.169821	0.389168		-0.507689	-0.708822	0.0273623		-0.508753	-0.493764	0.76854		-0.511065	-0.931823	0.988538		-0.95878	-0.507882	0.079193		-0.959082	-0.54239	0.593571		-0.95977	-0.998922	1		-0.848362	-0.398252	-0.0450839		-0.866167	-0.607151	0.116592		-0.864809	-1	1
		0.234772	-0.217798	-0.0231392		0.233565	-0.136851	-0.0920565		0.242956	0.150942	0.401095		-0.513008	-0.712179	0.027385		-0.514069	-0.490668	0.766843		-0.516376	-0.935629	0.988551		-0.960274	-0.50694	0.0775658		-0.960569	-0.540299	0.592369		-0.961241	-0.999046	1		-0.84503	-0.393482	-0.0459184		-0.863156	-0.609246	0.112096		-0.86178	-1	1
		0.228734	-0.223372	-0.023836		0.227525	-0.139125	-0.0853429		0.236926	0.132062	0.412947		-0.518308	-0.715494	0.0274326		-0.519364	-0.487576	0.76474		-0.521666	-0.939435	0.988563		-0.961731	-0.505991	0.0758738		-0.962017	-0.538125	0.590968		-0.962674	-0.999169	1		-0.841762	-0.388707	-0.0467003		-0.860111	-0.611262	0.107236		-0.858717	-1	1
		0.222686	-0.228955	-0.0245407		0.221476	-0.141407	-0.0780131		0.230886	0.113183	0.424529		-0.523586	-0.718768	0.0275033		-0.524639	-0.484494	0.762227		-0.526936	-0.942867	0.988575		-0.963149	-0.505036	0.0741359		-0.963428	-0.535825	0.589364		-0.964069	-0.999293	1		-0.838574	-0.383923	-0.0474273		-0.857032	-0.613241	0.102002		-0.855619	-1	1
		0.21663	-0.234546	-0.0252582		0.215418	-0.143698	-0.070053		0.224836	0.0943031	0.435672		-0.528845	-0.721999	0.0275946		-0.529893	-0.48142	0.759307		-0.532185	-0.946048	0.988586		-0.964529	-0.504074	0.072371		-0.9648	-0.533362	0.587561		-0.965426	-0.999417	1		-0.835167	-0.379124	-0.0480976		-0.85392	-0.615148	0.0963959		-0.852488	-1	1.00001
		0.210566	-0.240146	-0.0259933		0.209352	-0.146005	-0.0614555		0.218778	0.0754236	0.446247		-0.534082	-0.725188	0.027704		-0.535126	-0.478352	0.75599		-0.537413	-0.949229	0.988597		-0.965871	-0.503104	0.0705975		-0.966135	-0.530816	0.585579		-0.966744	-0.999541	1		-0.831908	-0.374304	-0.0487095		-0.850774	-0.617008	0.0904333		-0.849323	-1	1.00001
		0.204493	-0.245758	-0.0267502		0.203277	-0.148346	-0.052222		0.212711	0.0564609	0.456171		-0.539298	-0.728333	0.027829		-0.540338	-0.475298	0.752295		-0.542619	-0.952411	0.988607		-0.967175	-0.502125	0.0688325		-0.967431	-0.52811	0.583445		-0.968025	-0.99962	1		-0.828611	-0.369458	-0.0492617		-0.847594	-0.618835	0.0841406		-0.846125	-1	1.00001
		0.198412	-0.251381	-0.0275313		0.197195	-0.150707	-0.0423625		0.206635	0.0371652	0.465404		-0.544493	-0.731435	0.0279678		-0.545528	-0.47225	0.748247		-0.547805	-0.955592	0.988615		-0.968441	-0.501134	0.0670918		-0.968689	-0.525283	0.581195		-0.969267	-0.999688	1		-0.825157	-0.364579	-0.0497528		-0.84438	-0.620594	0.0775483		-0.842892	-1	1.00001
		0.192323	-0.257018	-0.0283367		0.191105	-0.153115	-0.0318955		0.200551	0.0178696	0.473946		-0.549666	-0.734492	0.0281199		-0.550697	-0.469213	0.743876		-0.552968	-0.958774	0.988624		-0.969668	-0.500127	0.0653887		-0.969909	-0.522376	0.578867		-0.970471	-0.999756	1		-0.821775	-0.359664	-0.0501816		-0.841134	-0.62233	0.0706851		-0.839627	-1	1.00001
		0.186227	-0.262668	-0.0291635		0.185007	-0.155566	-0.0208468		0.194459	-0.0014261	0.481828		-0.554818	-0.737503	0.0282861		-0.555845	-0.466192	0.739217		-0.55811	-0.961838	0.988631		-0.970857	-0.499102	0.0637334		-0.971091	-0.519271	0.576496		-0.971636	-0.999823	1		-0.818284	-0.35471	-0.0505475		-0.837854	-0.624034	0.0635735		-0.836328	-1	1.00001
		0.180123	-0.268333	-0.0300058		0.178901	-0.158046	-0.00924818		0.18836	-0.0207218	0.489112		-0.559948	-0.740465	0.0284695		-0.56097	-0.46318	0.73431		-0.56323	-0.964436	0.988637		-0.972008	-0.498053	0.0621323		-0.972234	-0.516088	0.574113		-0.972763	-0.999891	1		-0.814777	-0.349718	-0.0508509		-0.834541	-0.625704	0.0562286		-0.832997	-1	1.00001
		0.174012	-0.274013	-0.0308544		0.172789	-0.16061	0.00286324		0.182253	-0.0400174	0.495875		-0.565056	-0.743378	0.0286738		-0.566073	-0.460184	0.729206		-0.568327	-0.967033	0.988643		-0.973121	-0.496978	0.0605883		-0.973339	-0.512787	0.571746		-0.973851	-0.999959	1		-0.811184	-0.344689	-0.0510943		-0.831195	-0.627361	0.04866		-0.829632	-1	1.00001
		0.167895	-0.27971	-0.0316978		0.16667	-0.16321	0.0154456		0.176138	-0.0593131	0.502211		-0.570141	-0.746241	0.0289032		-0.571154	-0.457203	0.723962		-0.573402	-0.969631	0.988647		-0.974195	-0.495872	0.0591001		-0.974405	-0.509334	0.569415		-0.974901	-1	1		-0.807603	-0.339626	-0.0512828		-0.827816	-0.628997	0.0408733		-0.826234	-1	1.00001
		0.16177	-0.285424	-0.0325231		0.160545	-0.165865	0.0284525		0.170016	-0.0784972	0.508222		-0.575204	-0.749053	0.0291619		-0.576213	-0.454232	0.718643		-0.578455	-0.972228	0.988651		-0.975231	-0.494733	0.0576626		-0.975433	-0.505807	0.567136		-0.975912	-1	1		-0.804097	-0.334532	-0.0514244		-0.824405	-0.630629	0.0328717		-0.822804	-1	1.00001
		0.15564	-0.291153	-0.0333165		0.154413	-0.168593	0.0418341		0.163888	-0.0976534	0.514014		-0.580244	-0.751813	0.0294532		-0.581248	-0.451288	0.713317		-0.583484	-0.974826	0.988654		-0.976228	-0.493556	0.0562676		-0.976423	-0.502132	0.564922		-0.976884	-1	1		-0.800382	-0.32941	-0.051529		-0.820961	-0.632257	0.0246584		-0.819341	-1	1.00001
		0.149503	-0.296896	-0.0340645		0.148275	-0.171359	0.0555371		0.157753	-0.11681	0.519692		-0.585261	-0.75452	0.0297801		-0.586261	-0.448356	0.708053		-0.588491	-0.977423	0.988657		-0.977187	-0.492342	0.0549043		-0.977374	-0.498353	0.562778		-0.977817	-1	1		-0.796711	-0.324263	-0.0516078		-0.817485	-0.633892	0.0162382		-0.815845	-1	1.00001
		0.14336	-0.30265	-0.0347538		0.142131	-0.174197	0.069505		0.151611	-0.135966	0.525359		-0.590256	-0.757174	0.0301447		-0.59125	-0.445444	0.702921		-0.593475	-0.979594	0.988659		-0.978107	-0.491088	0.0535608		-0.978286	-0.494504	0.560704		-0.978712	-1	1		-0.793165	-0.319091	-0.0516718		-0.813976	-0.635537	0.00761889		-0.812317	-1	1.00001
		0.137212	-0.308409	-0.035372		0.135981	-0.177089	0.0836786		0.145464	-0.155122	0.53111		-0.595226	-0.759773	0.0305489		-0.596217	-0.442559	0.697988		-0.598435	-0.981659	0.988661		-0.978988	-0.489795	0.052226		-0.97916	-0.49049	0.558692		-0.979568	-1	1		-0.789429	-0.313895	-0.0517306		-0.810435	-0.637194	-0.00118861		-0.808757	-0.996177	1.00001
		0.131058	-0.314168	-0.0359082		0.129826	-0.180017	0.0979978		0.139311	-0.174278	0.53703		-0.600174	-0.76232	0.0309935		-0.601159	-0.43969	0.693318		-0.603371	-0.983724	0.988662		-0.979831	-0.488468	0.0508915		-0.979995	-0.486414	0.556728		-0.980385	-1	1		-0.785636	-0.308675	-0.0517913		-0.806863	-0.638876	-0.0101698		-0.805164	-0.992353	1.00001
		0.124899	-0.319921	-0.0363541		0.123666	-0.183035	0.112403		0.133152	-0.193182	0.543191		-0.605097	-0.764815	0.0314795		-0.606078	-0.43685	0.688966		-0.608284	-0.985789	0.988663		-0.980635	-0.487107	0.049553		-0.980791	-0.482246	0.55479		-0.981164	-1	1		-0.781835	-0.303432	-0.0518585		-0.803258	-0.640569	-0.0193069		-0.80154	-0.98853	1.00001
		0.118735	-0.325664	-0.0367043		0.117501	-0.18609	0.126836		0.126987	-0.211706	0.549646		-0.609997	-0.767258	0.0320071		-0.610973	-0.434037	0.68498		-0.613173	-0.987853	0.988663		-0.9814	-0.485716	0.0482103		-0.981549	-0.477958	0.552846		-0.981903	-1	1		-0.777975	-0.298165	-0.0519333		-0.799622	-0.642288	-0.028579		-0.797884	-0.984706	1.00001
		0.112566	-0.331393	-0.0369581		0.111332	-0.189202	0.141245		0.120818	-0.230231	0.556426		-0.614873	-0.76965	0.0325764		-0.615844	-0.431241	0.681397		-0.618037	-0.989918	0.988664		-0.982127	-0.484296	0.046867		-0.982268	-0.473612	0.550867		-0.982604	-1	1		-0.774203	-0.292874	-0.0520141		-0.795954	-0.644022	-0.0379611		-0.794196	-0.980883	1.00001
		0.106393	-0.337104	-0.0371194		0.105158	-0.192388	0.155577		0.114643	-0.248756	0.56354		-0.619724	-0.771993	0.0331868		-0.620691	-0.428493	0.678241		-0.622878	-0.99171	0.988664		-0.982815	-0.482851	0.0455295		-0.982948	-0.469149	0.548824		-0.983266	-1	1		-0.77038	-0.28756	-0.052097		-0.792255	-0.645768	-0.0474229		-0.790476	-0.977059	1
		0.100216	-0.342793	-0.0371969		0.0989798	-0.195611	0.169785		0.108464	-0.26728	0.570971		-0.624551	-0.774287	0.0338368		-0.625513	-0.425765	0.675528		-0.627693	-0.993091	0.988663		-0.983464	-0.481381	0.0442062		-0.983589	-0.464599	0.546697		-0.983889	-1	1		-0.766391	-0.282223	-0.0521763		-0.788524	-0.647534	-0.0569265		-0.786725	-0.972444	0.999996
		0.0940345	-0.348459	-0.037204		0.0927978	-0.198903	0.183824		0.102281	-0.285805	0.578692		-0.629354	-0.776534	0.0345237		-0.63031	-0.423067	0.673259		-0.632485	-0.994473	0.988663		-0.984074	-0.479887	0.0429061		-0.984192	-0.459992	0.544483		-0.984473	-1	1		-0.76227	-0.276864	-0.0522459		-0.784763	-0.649306	-0.066426		-0.782942	-0.967301	0.99999
		0.0878496	-0.354101	-0.0371567		0.0866122	-0.202243	0.197651		0.096093	-0.304329	0.58667		-0.634131	-0.778734	0.0352441		-0.635082	-0.420405	0.671424		-0.637251	-0.995855	0.988663		-0.984646	-0.478369	0.0416381		-0.984755	-0.455242	0.542195		-0.985018	-1	1		-0.758383	-0.271486	-0.052299		-0.78097	-0.651087	-0.0758658		-0.779129	-0.962158	0.999982
		0.0816612	-0.359718	-0.037072		0.0804231	-0.205614	0.211229		0.0899014	-0.321882	0.594886		-0.638884	-0.780888	0.0359937		-0.63983	-0.417758	0.669998		-0.641992	-0.997237	0.988662		-0.985178	-0.476826	0.0404106		-0.98528	-0.450434	0.539866		-0.985524	-1	1		-0.754506	-0.266091	-0.0523291		-0.777146	-0.652878	-0.0851814		-0.775284	-0.957015	0.999973
		0.0754695	-0.365309	-0.0369665		0.0742308	-0.209056	0.224526		0.0837061	-0.339434	0.603337		-0.643611	-0.782999	0.0367675		-0.644552	-0.415137	0.66894		-0.646708	-0.998618	0.988662		-0.985672	-0.475256	0.03923		-0.985766	-0.445541	0.537542		-0.985991	-1	1		-0.750353	-0.260684	-0.0523291		-0.773292	-0.654673	-0.0943011		-0.771409	-0.951872	0.999962
		0.0692749	-0.370877	-0.0368552		0.0680357	-0.212526	0.237516		0.0775073	-0.356987	0.612042		-0.648313	-0.78507	0.0375605		-0.649249	-0.412528	0.668199		-0.651398	-1	0.988661		-0.986127	-0.473659	0.0381004		-0.986213	-0.440533	0.535282		-0.98642	-1	1		-0.746404	-0.255267	-0.0522923		-0.769407	-0.656476	-0.103149		-0.767503	-0.946729	0.99995
		0.0630776	-0.376419	-0.0367506		0.0618378	-0.216036	0.25018		0.0713054	-0.374539	0.621033		-0.652989	-0.787103	0.0383677		-0.65392	-0.409927	0.667712		-0.656063	-1	0.988661		-0.986542	-0.472035	0.0370231		-0.986621	-0.435468	0.533149		-0.986809	-1	1		-0.742308	-0.249846	-0.0522115		-0.765492	-0.658283	-0.111651		-0.763566	-0.941332	0.999936
		0.0568777	-0.381937	-0.0366623		0.0556375	-0.219599	0.262509		0.0651004	-0.392092	0.630353		-0.657639	-0.7891	0.0391848		-0.658565	-0.407329	0.667409		-0.660702	-1	0.98866		-0.986919	-0.470385	0.0359958		-0.98699	-0.43029	0.531212		-0.987159	-1	1		-0.738192	-0.244423	-0.0520807		-0.761547	-0.660092	-0.11974		-0.759599	-0.934914	0.99992
		0.0506757	-0.387429	-0.0365965		0.049435	-0.223189	0.2745		0.0588928	-0.409644	0.64005		-0.662264	-0.791063	0.0400083		-0.663184	-0.404727	0.667215		-0.665315	-1	0.98866		-0.987257	-0.468705	0.0350134		-0.98732	-0.425029	0.52954		-0.98747	-1	1		-0.734181	-0.239003	-0.0518956		-0.757572	-0.661904	-0.127358		-0.755602	-0.928496	0.999902
		0.0444716	-0.392897	-0.0365554		0.0432305	-0.226833	0.286162		0.0526826	-0.42647	0.650169		-0.666862	-0.792991	0.0408355		-0.667777	-0.40212	0.667051		-0.669902	-1	0.988659		-0.987556	-0.466996	0.0340671		-0.987611	-0.419713	0.528201		-0.987742	-1	1		-0.729848	-0.233586	-0.0516554		-0.753566	-0.663714	-0.134461		-0.751575	-0.922078	0.999883
		0.0382657	-0.39834	-0.0365382		0.0370244	-0.230518	0.297514		0.0464702	-0.442811	0.66075		-0.671434	-0.794884	0.041665		-0.672344	-0.399498	0.666842		-0.674462	-1	0.988659		-0.987816	-0.465255	0.0331457		-0.987863	-0.414265	0.527256		-0.987975	-1	1		-0.725667	-0.228174	-0.0513629		-0.749531	-0.665519	-0.141013		-0.747518	-0.915661	0.999862
		0.0320584	-0.403759	-0.0365417		0.0308167	-0.234231	0.308587		0.0402558	-0.459152	0.671818		-0.675979	-0.796742	0.0424963		-0.676884	-0.396868	0.66651		-0.678996	-1	0.988658		-0.988037	-0.463483	0.0322362		-0.988076	-0.408767	0.526763		-0.988169	-1	1		-0.721559	-0.222764	-0.0510247		-0.745467	-0.667308	-0.14699		-0.743431	-0.909243	0.99984
		0.0258498	-0.409156	-0.036562		0.0246079	-0.238008	0.319418		0.0340396	-0.475493	0.683376		-0.680498	-0.798562	0.0433304		-0.681398	-0.394217	0.665985		-0.683502	-1	0.988658		-0.988219	-0.461681	0.0313251		-0.98825	-0.403192	0.526767		-0.988324	-1	1		-0.717186	-0.217353	-0.0506498		-0.741373	-0.669088	-0.152372		-0.739315	-0.902825	0.999817
		0.0196401	-0.414532	-0.0365947		0.0183981	-0.24181	0.33006		0.0278219	-0.491834	0.695405		-0.68499	-0.800345	0.0441697		-0.685884	-0.391548	0.6652		-0.687982	-1	0.988658		-0.988362	-0.459849	0.0303989		-0.988386	-0.397518	0.527303		-0.988439	-1	1		-0.712892	-0.211938	-0.0502491		-0.737249	-0.670842	-0.157145		-0.73517	-0.895294	0.999793
		0.0134297	-0.419889	-0.0366348		0.0121876	-0.245649	0.340569		0.0216029	-0.508175	0.70785		-0.689455	-0.802088	0.0450177		-0.690344	-0.388868	0.664091		-0.692435	-1	0.988657		-0.988466	-0.457991	0.0294453		-0.988482	-0.391794	0.528388		-0.988516	-1	1		-0.708682	-0.206515	-0.0498336		-0.733097	-0.672571	-0.161294		-0.730995	-0.887484	0.999769
		0.00721879	-0.425227	-0.036677		0.00597654	-0.249536	0.351014		0.0153829	-0.524232	0.720622		-0.693893	-0.803793	0.0458793		-0.694776	-0.386157	0.662601		-0.696861	-1	0.988657		-0.98853	-0.456108	0.0284542		-0.988539	-0.385969	0.530027		-0.988553	-1	1		-0.704263	-0.201082	-0.0494131		-0.728916	-0.674283	-0.164806		-0.726791	-0.879675	0.999745
		0.00100756	-0.430548	-0.0367155		-0.000234713	-0.253446	0.361465		0.00916215	-0.539155	0.733606		-0.698303	-0.80546	0.0467599		-0.69918	-0.383434	0.660674		-0.701258	-1	0.988657		-0.988556	-0.454203	0.0274187		-0.988557	-0.380069	0.532205		-0.988551	-1	1		-0.699873	-0.195633	-0.0489957		-0.724706	-0.675944	-0.167671		-0.722558	-0.871865	0.999723
		-0.00520371	-0.435851	-0.0367453		-0.00644596	-0.257405	0.371999		0.00294084	-0.554077	0.746671		-0.702686	-0.807092	0.0476655		-0.703558	-0.380691	0.658262		-0.705629	-1	0.988657		-0.988543	-0.452277	0.0263355		-0.988536	-0.374117	0.534887		-0.988509	-1	1		-0.695519	-0.190164	-0.0485866		-0.720467	-0.677581	-0.169878		-0.718297	-0.864056	0.999702
		-0.0114148	-0.441135	-0.0367627		-0.0126569	-0.261403	0.382692		-0.00328077	-0.569	0.75968		-0.707041	-0.808691	0.0486017		-0.707907	-0.377919	0.655314		-0.709971	-1	0.988656		-0.988491	-0.450332	0.0252044		-0.988476	-0.368036	0.538025		-0.988429	-1	1		-0.691068	-0.184671	-0.0481879		-0.7162	-0.679182	-0.171419		-0.714007	-0.856246	0.999685
		-0.0176254	-0.446398	-0.0367664		-0.0188674	-0.265427	0.393622		-0.00950243	-0.583923	0.772496		-0.711368	-0.810258	0.0495736		-0.712228	-0.375131	0.651789		-0.714285	-1	0.988656		-0.9884	-0.448372	0.0240277		-0.988377	-0.361902	0.541557		-0.988309	-1	1		-0.686651	-0.179149	-0.0477987		-0.711904	-0.680727	-0.172288		-0.709689	-0.847843	0.999672
		-0.0238353	-0.451636	-0.0367594		-0.0250772	-0.269522	0.404861		-0.0157239	-0.598846	0.784982		-0.715667	-0.811795	0.050585		-0.716522	-0.372308	0.647644		-0.718571	-1	0.988656		-0.988269	-0.446399	0.0228101		-0.988239	-0.355689	0.545413		-0.98815	-1	1		-0.682062	-0.173594	-0.0474155		-0.707581	-0.682243	-0.17248		-0.705342	-0.838552	0.999665
		-0.0300443	-0.456847	-0.0367482		-0.0312859	-0.273648	0.416478		-0.0219449	-0.613769	0.797003		-0.719937	-0.813303	0.0516384		-0.720787	-0.369454	0.642843		-0.722828	-1	0.988656		-0.9881	-0.444416	0.0215578		-0.988062	-0.349368	0.549524		-0.987951	-1	1		-0.67749	-0.168003	-0.0470329		-0.703229	-0.683694	-0.171992		-0.700967	-0.82926	0.999666
		-0.0362521	-0.462026	-0.0367435		-0.0374935	-0.277819	0.428531		-0.0281653	-0.627428	0.808425		-0.72418	-0.814784	0.0527351		-0.725023	-0.36658	0.637353		-0.727057	-1	0.988656		-0.987892	-0.442425	0.0202788		-0.987845	-0.342994	0.553818		-0.987713	-1	1		-0.673008	-0.162372	-0.0466447		-0.69885	-0.68509	-0.170816		-0.696564	-0.819968	0.999676
		-0.0424584	-0.467172	-0.036758		-0.0436995	-0.282052	0.441071		-0.0343847	-0.640771	0.819131		-0.728393	-0.816243	0.053875		-0.729231	-0.363649	0.631151		-0.731258	-1	0.988656		-0.987645	-0.440427	0.0189824		-0.98759	-0.336512	0.558233		-0.987436	-1	1		-0.668447	-0.156702	-0.0462445		-0.694443	-0.686449	-0.168939		-0.692134	-0.810676	0.999697
		-0.0486631	-0.472284	-0.0368048		-0.0499038	-0.286316	0.454138		-0.040603	-0.654115	0.829026		-0.732578	-0.817679	0.0550579		-0.733411	-0.360696	0.624217		-0.735429	-1	0.988656		-0.987358	-0.438423	0.017678		-0.987296	-0.32995	0.56271		-0.98712	-1	1		-0.663864	-0.150993	-0.0458262		-0.690009	-0.687705	-0.166348		-0.687676	-0.801384	0.999732
		-0.0548659	-0.477362	-0.0368954		-0.0561062	-0.290642	0.467761		-0.0468198	-0.667458	0.838048		-0.736734	-0.819095	0.0562828		-0.737561	-0.357708	0.616544		-0.739571	-1	0.988656		-0.987033	-0.436411	0.0163752		-0.986963	-0.323336	0.567202		-0.986764	-1	1		-0.659244	-0.145247	-0.0453839		-0.685547	-0.688916	-0.163028		-0.68319	-0.792092	0.999784
		-0.0610664	-0.482403	-0.0370377		-0.0623063	-0.295015	0.481955		-0.053035	-0.680802	0.846165		-0.740861	-0.820491	0.057549		-0.741682	-0.354675	0.608132		-0.743685	-1	0.988656		-0.986669	-0.43439	0.0150829		-0.986591	-0.316593	0.57167		-0.986369	-1	0.999999		-0.654646	-0.139466	-0.044912		-0.681059	-0.690058	-0.158972		-0.678677	-0.781267	0.999854
		-0.0672646	-0.48741	-0.037236		-0.068504	-0.299419	0.496725		-0.0592483	-0.694145	0.853369		-0.744959	-0.821869	0.0588559		-0.745774	-0.351619	0.598992		-0.747769	-1	0.988656		-0.986266	-0.432357	0.0138087		-0.98618	-0.309803	0.576086		-0.985935	-1	0.999999		-0.649944	-0.133654	-0.044405		-0.676543	-0.691104	-0.154187		-0.674137	-0.770442	0.999945
		-0.0734602	-0.492383	-0.0374896		-0.0746989	-0.303899	0.512056		-0.0654595	-0.706825	0.859676		-0.749027	-0.823229	0.0602037		-0.749836	-0.348523	0.589143		-0.751823	-1	0.988656		-0.985824	-0.430308	0.012559		-0.98573	-0.302941	0.580433		-0.985462	-1	0.999999		-0.645268	-0.127811	-0.0438579		-0.672001	-0.692099	-0.1487		-0.66957	-0.759617	1.00006
		-0.0796528	-0.497326	-0.0377936		-0.0808909	-0.308411	0.527916		-0.0716682	-0.718508	0.865116		-0.753066	-0.824572	0.0615927		-0.753869	-0.345399	0.578612		-0.755848	-1	0.988656		-0.985343	-0.428243	0.0113386		-0.985242	-0.295991	0.584708		-0.98495	-1	0.999999		-0.64057	-0.121939	-0.0432666		-0.667432	-0.69299	-0.142566		-0.664977	-0.748792	1.0002
		-0.0858423	-0.502242	-0.0381387		-0.0870798	-0.312969	0.544255		-0.0778744	-0.730192	0.869733		-0.757075	-0.825895	0.0630234		-0.757872	-0.342258	0.567439		-0.759843	-1	0.988656		-0.984823	-0.426158	0.0101506		-0.984714	-0.288998	0.588918		-0.984399	-1	0.999999		-0.635697	-0.116042	-0.0426282		-0.662837	-0.693801	-0.135859		-0.660356	-0.737967	1.00038
		-0.0920284	-0.507136	-0.0385121		-0.0932652	-0.31759	0.560999		-0.0840776	-0.741875	0.873582		-0.761054	-0.827198	0.0644959		-0.761845	-0.339083	0.555674		-0.763808	-1	0.988656		-0.984264	-0.424052	0.00899662		-0.984147	-0.281926	0.593084		-0.983808	-1	0.999999		-0.63102	-0.11012	-0.0419416		-0.658216	-0.694557	-0.128676		-0.65571	-0.727142	1.00058
		-0.0982108	-0.512016	-0.0388986		-0.0994469	-0.322243	0.578059		-0.0902778	-0.753559	0.876721		-0.765003	-0.828478	0.0660104		-0.765788	-0.3359	0.543382		-0.767743	-1	0.988656		-0.983666	-0.421923	0.00787704		-0.983542	-0.274801	0.597239		-0.983179	-1	0.999999		-0.626326	-0.104177	-0.0412075		-0.653569	-0.695173	-0.121127		-0.651036	-0.7154	1.00082
		-0.104389	-0.516885	-0.0392815		-0.105625	-0.326958	0.595331		-0.0964745	-0.765242	0.879214		-0.768922	-0.829732	0.0675664		-0.769701	-0.332704	0.53064		-0.771648	-1	0.988656		-0.98303	-0.41977	0.0067912		-0.982898	-0.267639	0.601427		-0.98251	-1	0.999999		-0.621402	-0.098215	-0.0404282		-0.648896	-0.695731	-0.11333		-0.646337	-0.703046	1.0011
		-0.110564	-0.521747	-0.0396431		-0.111798	-0.331719	0.612701		-0.102668	-0.776926	0.881129		-0.77281	-0.830957	0.0691637		-0.773583	-0.329507	0.51754		-0.775522	-1	0.988656		-0.982354	-0.417595	0.00573808		-0.982215	-0.260398	0.6057		-0.981803	-1	0.999999		-0.616589	-0.0922343	-0.0396073		-0.644197	-0.696203	-0.105407		-0.641612	-0.690692	1.00142
		-0.116734	-0.526608	-0.0399655		-0.117967	-0.336511	0.630043		-0.108857	-0.786947	0.882531		-0.776668	-0.832152	0.0708017		-0.777435	-0.326313	0.504186		-0.779366	-1	0.988656		-0.98164	-0.415398	0.00471719		-0.981493	-0.25313	0.610118		-0.981056	-1	1		-0.611806	-0.0862371	-0.0387485		-0.639473	-0.696558	-0.0974829		-0.636861	-0.678339	1.00177
		-0.122899	-0.53147	-0.0402309		-0.124132	-0.341373	0.64723		-0.115042	-0.796968	0.883487		-0.780496	-0.833316	0.0724793		-0.781256	-0.323131	0.490693		-0.783179	-1	0.988656		-0.980888	-0.413178	0.00372956		-0.980732	-0.245822	0.614743		-0.980271	-1	1		-0.60686	-0.0802239	-0.0378556		-0.634724	-0.696854	-0.0896776		-0.632085	-0.665985	1.00217
		-0.12906	-0.536335	-0.0404229		-0.130292	-0.346261	0.664127		-0.121223	-0.80699	0.884063		-0.784292	-0.834449	0.0741947		-0.785047	-0.319972	0.477181		-0.786962	-1	0.988656		-0.980096	-0.410937	0.00277798		-0.979933	-0.238466	0.619638		-0.979446	-1	1		-0.601904	-0.0741959	-0.036931		-0.629949	-0.697031	-0.0821102		-0.627284	-0.653631	1.0026
		-0.135216	-0.541204	-0.0405282		-0.136446	-0.351187	0.680599		-0.127399	-0.817011	0.88432		-0.788058	-0.835553	0.0759443		-0.788806	-0.316828	0.463773		-0.790713	-1	0.988656		-0.979266	-0.408674	0.00186676		-0.979095	-0.231087	0.624856		-0.978583	-1	1		-0.596968	-0.0681545	-0.0359757		-0.62515	-0.69712	-0.074895		-0.622457	-0.640983	1.00307
		-0.141366	-0.54608	-0.0405379		-0.142595	-0.356158	0.696506		-0.133571	-0.827033	0.88432		-0.791792	-0.836627	0.0777228		-0.792534	-0.313738	0.450586		-0.794433	-1	0.988656		-0.978397	-0.40639	0.00100086		-0.978218	-0.22366	0.630445		-0.977681	-1	1		-0.591932	-0.0621009	-0.034989		-0.620326	-0.69715	-0.0681396		-0.617605	-0.627157	1.00357
		-0.14751	-0.550964	-0.0404483		-0.148739	-0.361148	0.71171		-0.139737	-0.837054	0.88412		-0.795495	-0.837675	0.0795219		-0.796231	-0.310675	0.43773		-0.798122	-1	0.988656		-0.977489	-0.404086	0.000185012		-0.977303	-0.216197	0.636437		-0.97674	-1	1		-0.586971	-0.0560347	-0.0339683		-0.615478	-0.697033	-0.0619421		-0.612729	-0.613331	1.00409
		-0.153649	-0.55586	-0.0402617		-0.154876	-0.366172	0.726074		-0.145898	-0.846112	0.883776		-0.799167	-0.838695	0.0813302		-0.799897	-0.307652	0.425308		-0.801779	-1	0.988656		-0.976543	-0.401763	-0.000576951		-0.976349	-0.20871	0.642854		-0.97576	-1	1		-0.582065	-0.0499541	-0.0329102		-0.610605	-0.696856	-0.0563876		-0.607828	-0.599506	1.00464
		-0.159782	-0.56077	-0.0399867		-0.161008	-0.371211	0.73946		-0.152054	-0.854529	0.88334		-0.802807	-0.839683	0.0831337		-0.80353	-0.304693	0.413408		-0.805404	-1	0.988656		-0.975558	-0.399421	-0.0012824		-0.975357	-0.201161	0.649709		-0.974742	-1	1		-0.576967	-0.0438561	-0.0318112		-0.605708	-0.696591	-0.0515436		-0.602903	-0.58568	1.00519
		-0.165908	-0.565696	-0.0396372		-0.167133	-0.376259	0.751738		-0.158204	-0.862945	0.882864		-0.806416	-0.840636	0.0849165		-0.807133	-0.301769	0.402107		-0.808998	-1	0.988656		-0.974535	-0.397062	-0.00193024		-0.974326	-0.193588	0.657004		-0.973684	-1	1		-0.571905	-0.0377364	-0.0306687		-0.600788	-0.696207	-0.0474553		-0.597954	-0.571854	1.00573
		-0.172028	-0.570639	-0.0392304		-0.173251	-0.381316	0.762783		-0.164348	-0.871361	0.882395		-0.809993	-0.84155	0.0866621		-0.810703	-0.298917	0.391471		-0.81256	-1	0.988656		-0.973474	-0.394686	-0.0025213		-0.973257	-0.18598	0.66473		-0.972588	-1	1		-0.566831	-0.0315897	-0.0294818		-0.595843	-0.695762	-0.0441431		-0.59298	-0.558029	1.00625
		-0.178141	-0.575601	-0.0387852		-0.179363	-0.38637	0.772485		-0.170485	-0.879777	0.881981		-0.813537	-0.842421	0.0883551		-0.814241	-0.296126	0.381547		-0.816089	-1	0.988656		-0.972374	-0.392293	-0.00305831		-0.972149	-0.178329	0.672869		-0.971453	-1	1		-0.561638	-0.0254115	-0.028251		-0.590875	-0.695195	-0.0416041		-0.587983	-0.54308	1.00673
		-0.184247	-0.580579	-0.0383201		-0.185468	-0.39142	0.780753		-0.176616	-0.888194	0.881666		-0.81705	-0.843248	0.0899822		-0.817747	-0.293376	0.372371		-0.819587	-1	0.988656		-0.971235	-0.389881	-0.00354544		-0.971003	-0.170657	0.68139		-0.97028	-1	1		-0.556533	-0.0191979	-0.026979		-0.585884	-0.694536	-0.0398163		-0.582963	-0.52785	1.00713
		-0.190346	-0.585572	-0.0378512		-0.191565	-0.396455	0.787509		-0.18274	-0.896309	0.881495		-0.82053	-0.844029	0.0915338		-0.821221	-0.290739	0.363962		-0.823052	-1	0.988656		-0.970058	-0.387448	-0.0039878		-0.969818	-0.16295	0.690247		-0.969067	-1	1		-0.551392	-0.0129456	-0.0256702		-0.58087	-0.693815	-0.0387433		-0.577919	-0.512621	1.00745
		-0.196437	-0.590575	-0.0373908		-0.197655	-0.401481	0.792694		-0.188857	-0.903219	0.881511		-0.823978	-0.844765	0.0930039		-0.824663	-0.288152	0.356332		-0.826484	-1	0.988656		-0.968843	-0.384992	-0.00439117		-0.968595	-0.155223	0.699383		-0.967817	-1	1.00001		-0.546285	-0.00665201	-0.0243311		-0.575832	-0.692938	-0.0383399		-0.572851	-0.497391	1.00763
		-0.202521	-0.595585	-0.0369466		-0.203737	-0.406483	0.796258		-0.194967	-0.91013	0.881756		-0.827394	-0.845456	0.0943911		-0.828072	-0.28564	0.349479		-0.829884	-1	0.988656		-0.96759	-0.382511	-0.00476169		-0.967334	-0.147482	0.708726		-0.966527	-1	1.00001		-0.541164	-0.000314865	-0.0229708		-0.570772	-0.691999	-0.038555		-0.567761	-0.482161	1.00765
		-0.208596	-0.600599	-0.0365213		-0.209811	-0.411464	0.798165		-0.20107	-0.91704	0.882271		-0.830777	-0.846101	0.0956975		-0.831448	-0.283235	0.343395		-0.833251	-1	0.988656		-0.966298	-0.380004	-0.00510543		-0.966035	-0.13972	0.718194		-0.965199	-1	1.00001		-0.535832	0.00606703	-0.0215999		-0.56569	-0.690967	-0.0393324		-0.562648	-0.466932	1.00746
		-0.214664	-0.605613	-0.036113		-0.215876	-0.41643	0.798391		-0.207165	-0.923951	0.883095		-0.834126	-0.8467	0.0969285		-0.834791	-0.280885	0.338064		-0.836584	-1	0.988656		-0.964968	-0.37747	-0.00542801		-0.964698	-0.131955	0.727699		-0.963832	-1	1.00001		-0.530574	0.0124942	-0.0202306		-0.560585	-0.689811	-0.0406101		-0.557512	-0.451165	1.00702
		-0.220723	-0.610623	-0.0357158		-0.221933	-0.421355	0.796919		-0.213252	-0.930862	0.884267		-0.837444	-0.847254	0.0980919		-0.838102	-0.278649	0.333465		-0.839885	-1	0.988656		-0.963601	-0.374909	-0.00573427		-0.963322	-0.124184	0.737149		-0.962427	-1	1.00001		-0.525419	0.0189665	-0.0188761		-0.555458	-0.688595	-0.0423189		-0.552354	-0.434593	1.00627
		-0.226773	-0.615625	-0.0353207		-0.227982	-0.426261	0.793751		-0.219331	-0.937772	0.885823		-0.840727	-0.847761	0.0991969		-0.841379	-0.276504	0.329573		-0.843152	-1	0.988656		-0.962195	-0.372319	-0.0060281		-0.961909	-0.116416	0.746455		-0.960984	-1	1.00001		-0.520154	0.0254835	-0.0175493		-0.550309	-0.687258	-0.0443819		-0.547174	-0.418021	1.00517
		-0.232814	-0.620614	-0.0349166		-0.234021	-0.431142	0.788901		-0.225401	-0.943581	0.887797		-0.843978	-0.848223	0.100253		-0.844623	-0.27442	0.326359		-0.846386	-1	0.988656		-0.960751	-0.369702	-0.00631228		-0.960458	-0.108651	0.755532		-0.959501	-1	1.00001		-0.514822	0.0320433	-0.016262		-0.545138	-0.685833	-0.0467152		-0.541972	-0.401449	1.00364
		-0.238846	-0.625586	-0.0344911		-0.240051	-0.435986	0.782405		-0.231463	-0.949113	0.890219		-0.847196	-0.84864	0.101272		-0.847834	-0.2725	0.323795		-0.849587	-1	0.988656		-0.959269	-0.367058	-0.00658841		-0.958968	-0.100897	0.764301		-0.957981	-1	1.00001		-0.50957	0.0386422	-0.0150236		-0.539946	-0.684348	-0.049229		-0.536747	-0.384877	1.00164
		-0.244868	-0.630537	-0.034031		-0.246072	-0.440813	0.774311		-0.237516	-0.954646	0.893114		-0.85038	-0.849012	0.102262		-0.851011	-0.27065	0.321852		-0.852754	-1	0.988656		-0.95775	-0.364387	-0.00685661		-0.957441	-0.093157	0.772691		-0.956422	-1	1.00001		-0.504227	0.0452772	-0.0138403		-0.534732	-0.682722	-0.0518313		-0.531502	-0.368304	0.99909
		-0.250881	-0.635462	-0.0335228		-0.252082	-0.445605	0.764684		-0.24356	-0.960179	0.8965		-0.85353	-0.84934	0.103234		-0.854155	-0.268907	0.320501		-0.855887	-1	0.988656		-0.956192	-0.361689	-0.00711548		-0.955876	-0.0854261	0.780635		-0.954825	-1	1.00001		-0.498764	0.0519457	-0.0127147		-0.529497	-0.681042	-0.0544315		-0.526234	-0.351732	0.995934
		-0.256884	-0.640359	-0.0329542		-0.258083	-0.450374	0.753599		-0.249594	-0.965712	0.900388		-0.856647	-0.849622	0.104194		-0.857265	-0.267315	0.319713		-0.858987	-1	0.988656		-0.954597	-0.358966	-0.0073622		-0.954273	-0.0777274	0.788075		-0.95319	-1	1.00001		-0.493495	0.0586443	-0.0116459		-0.524242	-0.679279	-0.0569439		-0.520946	-0.333938	0.992106
		-0.262877	-0.645223	-0.0323151		-0.264074	-0.455127	0.741134		-0.255619	-0.971244	0.904778		-0.85973	-0.849856	0.105148		-0.860341	-0.265799	0.319459		-0.862052	-1	0.988656		-0.952964	-0.356219	-0.00759291		-0.952633	-0.0700448	0.794958		-0.951517	-1	1.00001		-0.488125	0.0653703	-0.0106289		-0.518966	-0.677413	-0.0592893		-0.515636	-0.316144	0.987543
		-0.268859	-0.650054	-0.0315992		-0.270054	-0.459846	0.727373		-0.261634	-0.976154	0.909657		-0.862779	-0.85004	0.106097		-0.863383	-0.264441	0.319708		-0.865084	-1	0.988656		-0.951294	-0.353449	-0.00780328		-0.950955	-0.0623866	0.801236		-0.949805	-1	1.00001		-0.48264	0.0721206	-0.00965552		-0.513669	-0.675494	-0.061396		-0.510305	-0.29835	0.982191
		-0.274831	-0.654848	-0.0308055		-0.276024	-0.464552	0.712398		-0.267639	-0.980128	0.914997		-0.865794	-0.850174	0.107038		-0.866391	-0.263203	0.320429		-0.868081	-1	0.988656		-0.949585	-0.350658	-0.00798942		-0.949239	-0.0547674	0.806874		-0.948056	-1	1.00001		-0.477334	0.0788911	-0.00871454		-0.508352	-0.673474	-0.0631997		-0.504954	-0.280556	0.976
		-0.280792	-0.659605	-0.0299385		-0.281983	-0.469237	0.696289		-0.273634	-0.984102	0.920752		-0.868775	-0.850258	0.107965		-0.869365	-0.262044	0.321584		-0.871044	-1	0.988656		-0.94784	-0.347845	-0.00814872		-0.947486	-0.0471695	0.811839		-0.946269	-1	1.00001		-0.471844	0.085677	-0.00779272		-0.503015	-0.671378	-0.064644		-0.499582	-0.262762	0.968934
		-0.286742	-0.664323	-0.0290086		-0.287931	-0.47389	0.679129		-0.279618	-0.988077	0.926854		-0.871721	-0.850292	0.108868		-0.872305	-0.261088	0.323133		-0.873973	-1	0.988656		-0.946057	-0.345011	-0.00828015		-0.945696	-0.0396179	0.816111		-0.944444	-1	1.00001		-0.466293	0.0924725	-0.00687613		-0.497658	-0.669233	-0.0656796		-0.49419	-0.244968	0.96097
		-0.29268	-0.669001	-0.0280306		-0.293867	-0.478525	0.661001		-0.285591	-0.992051	0.933212		-0.874633	-0.850278	0.109737		-0.87521	-0.260214	0.325031		-0.876867	-1	0.988656		-0.944237	-0.342155	-0.00838429		-0.943868	-0.032107	0.819677		-0.942581	-1	1.00001		-0.46087	0.0992715	-0.00595148		-0.492281	-0.666967	-0.0662649		-0.488778	-0.22659	0.952105
		-0.298607	-0.673639	-0.0270221		-0.299791	-0.483119	0.641992		-0.291553	-0.996026	0.93971		-0.877511	-0.850216	0.110559		-0.878081	-0.259465	0.327227		-0.879726	-1	0.988656		-0.942379	-0.339275	-0.00846306		-0.942003	-0.0246232	0.822534		-0.940681	-1	1.00001		-0.455275	0.106068	-0.00500714		-0.486885	-0.664654	-0.066367		-0.483346	-0.207823	0.942362
		-0.304523	-0.678239	-0.0260021		-0.305704	-0.487677	0.622188		-0.297504	-1	0.946224		-0.880353	-0.85011	0.111324		-0.880916	-0.258886	0.32967		-0.882551	-1	0.988656		-0.940484	-0.336371	-0.00851943		-0.940101	-0.0172153	0.824686		-0.938743	-1	1		-0.449789	0.112857	-0.00403365		-0.48147	-0.662271	-0.0659618		-0.477894	-0.189055	0.93179
		-0.310426	-0.682803	-0.0249888		-0.311605	-0.492212	0.601679		-0.303444	-1	0.952625		-0.883161	-0.849961	0.112022		-0.883718	-0.258395	0.332307		-0.885341	-1	0.988656		-0.938552	-0.33344	-0.00855714		-0.938161	-0.00984043	0.826142		-0.936767	-1	0.999996		-0.444364	0.119632	-0.00302405		-0.476036	-0.659799	-0.0650346		-0.472423	-0.170288	0.920467
		-0.316317	-0.687334	-0.0239987		-0.317494	-0.496678	0.580549		-0.309372	-1	0.9588		-0.885935	-0.849773	0.112645		-0.886484	-0.258078	0.335085		-0.888096	-1	0.988656		-0.936583	-0.330483	-0.00858046		-0.936185	-0.0025151	0.82692		-0.934754	-1	0.99999		-0.438702	0.126387	-0.00197396		-0.470583	-0.657285	-0.0635797		-0.466933	-0.151521	0.908495
		-0.322195	-0.691834	-0.0230458		-0.323369	-0.501114	0.558879		-0.315288	-1	0.964658		-0.888673	-0.849549	0.11319		-0.889215	-0.257894	0.337954		-0.890815	-1	0.988656		-0.934577	-0.327497	-0.008594		-0.934172	0.00473834	0.827045		-0.932704	-1	0.999982		-0.433082	0.133118	-0.000881786		-0.465111	-0.654689	-0.0616005		-0.461424	-0.132753	0.895988
		-0.328061	-0.696303	-0.0221402		-0.329233	-0.505506	0.536743		-0.321191	-1	0.970134		-0.891376	-0.849289	0.113656		-0.891911	-0.257799	0.340861		-0.8935	-1	0.988656		-0.932535	-0.324484	-0.00860231		-0.932122	0.0119543	0.826546		-0.930616	-1	0.999973		-0.427555	0.139818	0.000251341		-0.459621	-0.652036	-0.0591078		-0.455896	-0.11386	0.883061
		-0.333914	-0.700743	-0.0212883		-0.335083	-0.509833	0.514206		-0.327083	-1	0.97518		-0.894044	-0.848994	0.114047		-0.894572	-0.257926	0.343758		-0.896149	-1	0.988656		-0.930455	-0.321444	-0.00860966		-0.930035	0.0190924	0.82546		-0.928491	-1	0.999962		-0.421954	0.146483	0.00142201		-0.454113	-0.649345	-0.0561158		-0.450349	-0.0944629	0.869826
		-0.339753	-0.705153	-0.0204923		-0.34092	-0.514127	0.491334		-0.332961	-1	0.979772		-0.896677	-0.84866	0.11437		-0.897198	-0.258142	0.346596		-0.898763	-1	0.988656		-0.928338	-0.318379	-0.00861988		-0.927911	0.0261697	0.823829		-0.926329	-1	0.99995		-0.416267	0.153106	0.00262506		-0.448587	-0.64657	-0.0526384		-0.444784	-0.075066	0.856396
		-0.34558	-0.709535	-0.0197515		-0.346743	-0.51835	0.468196		-0.338827	-1	0.983898		-0.899274	-0.848283	0.114631		-0.899788	-0.258493	0.349334		-0.901341	-1	0.988656		-0.926185	-0.315291	-0.00863633		-0.92575	0.0332065	0.821702		-0.92413	-1	0.999936		-0.41067	0.159683	0.00385416		-0.443043	-0.643767	-0.0486875		-0.439201	-0.055669	0.84289
		-0.351392	-0.713888	-0.0190625		-0.352553	-0.522516	0.44487		-0.344679	-1	0.987558		-0.901836	-0.847859	0.114841		-0.902343	-0.259025	0.351938		-0.903884	-1	0.988656		-0.923996	-0.31218	-0.00866203		-0.923554	0.0401432	0.819131		-0.921893	-1	0.99992		-0.404999	0.166206	0.00510247		-0.437482	-0.64092	-0.0442739		-0.4336	-0.0362721	0.82944
		-0.357191	-0.718211	-0.0184202		-0.358349	-0.526644	0.421446		-0.350519	-1	0.990766		-0.904362	-0.847386	0.11501		-0.904862	-0.25965	0.35438		-0.90639	-1	0.988656		-0.92177	-0.309049	-0.00869972		-0.92132	0.0470419	0.816172		-0.91962	-1	0.999902		-0.399275	0.172671	0.00636353		-0.431903	-0.638025	-0.0394089		-0.427981	-0.0168752	0.816192
		-0.362975	-0.722501	-0.0178177		-0.364131	-0.53067	0.398027		-0.356344	-1	0.993539		-0.906853	-0.846861	0.115147		-0.907345	-0.260459	0.356639		-0.908861	-1	0.988656		-0.919507	-0.305898	-0.00875169		-0.91905	0.0538833	0.812879		-0.91731	-1	0.999883		-0.393711	0.179072	0.00763221		-0.426307	-0.63511	-0.0341078		-0.422345	0.00252178	0.803308
		-0.368746	-0.726758	-0.0172468		-0.369898	-0.534654	0.374732		-0.362156	-1	0.995903		-0.909307	-0.846284	0.11526		-0.909793	-0.261407	0.358704		-0.911296	-1	0.988656		-0.917209	-0.302728	-0.00881938		-0.916744	0.0606546	0.809307		-0.914963	-1	0.999862		-0.38786	0.185403	0.00890532		-0.420695	-0.632159	-0.028393		-0.416692	0.0221447	0.790947
		-0.374501	-0.730979	-0.0166981		-0.375651	-0.538573	0.351684		-0.367954	-1	0.997887		-0.911726	-0.845659	0.115359		-0.912204	-0.262448	0.36057		-0.913695	-1	0.988656		-0.914874	-0.299538	-0.00890305		-0.914402	0.067393	0.805498		-0.912579	-1	0.99984		-0.382129	0.191659	0.010182		-0.415066	-0.62919	-0.0222971		-0.411021	0.041824	0.779264
		-0.380242	-0.73516	-0.016162		-0.381389	-0.542404	0.329014		-0.373737	-1	0.999522		-0.914109	-0.84499	0.115452		-0.91458	-0.26372	0.362239		-0.916057	-1	0.988656		-0.912502	-0.296327	-0.00900135		-0.912024	0.0740701	0.801489		-0.910158	-1	0.999817		-0.376561	0.197833	0.011464		-0.409421	-0.62621	-0.0158658		-0.405334	0.0615034	0.768399
		-0.385968	-0.739302	-0.0156298		-0.387111	-0.54619	0.306851		-0.379506	-1	1.00084		-0.916456	-0.844284	0.115543		-0.916919	-0.265084	0.363716		-0.918383	-1	0.988656		-0.910095	-0.293094	-0.00911113		-0.90961	0.080709	0.797302		-0.907701	-1	0.999793		-0.370635	0.203915	0.0127553		-0.403759	-0.623214	-0.00915976		-0.39963	0.0811828	0.758477
		-0.391679	-0.743404	-0.0150959		-0.392819	-0.549881	0.285326		-0.38526	-1	1.00188		-0.918766	-0.843546	0.115637		-0.919223	-0.266583	0.365006		-0.920673	-1	0.988656		-0.907652	-0.289837	-0.00922754		-0.907159	0.0873222	0.792946		-0.905208	-1	0.999769		-0.364956	0.209899	0.0140618		-0.398081	-0.620218	-0.00225724		-0.39391	0.100862	0.749594
		-0.397374	-0.747465	-0.0145579		-0.398511	-0.553498	0.264568		-0.391	-1	1.00267		-0.92104	-0.842782	0.115736		-0.92149	-0.268255	0.366116		-0.922925	-1	0.988656		-0.905173	-0.286555	-0.00934472		-0.904673	0.0938828	0.788419		-0.902677	-1	0.999745		-0.359304	0.215777	0.0153906		-0.392388	-0.617222	0.00474573		-0.388173	0.120542	0.741812
		-0.403053	-0.751483	-0.0140174		-0.404187	-0.557066	0.2447		-0.396724	-1	1.00325		-0.923278	-0.841996	0.115838		-0.92372	-0.27001	0.367048		-0.925142	-1	0.988656		-0.902659	-0.283245	-0.00945649		-0.902152	0.100425	0.783707		-0.900111	-1	0.999723		-0.353354	0.221542	0.0167486		-0.386679	-0.614234	0.0117377		-0.382421	0.140206	0.735146
		-0.408717	-0.755458	-0.0134792		-0.409848	-0.560505	0.225835		-0.402433	-1	1.00363		-0.92548	-0.841193	0.115942		-0.925914	-0.271924	0.367802		-0.927321	-1	0.988656		-0.900108	-0.279906	-0.00955657		-0.899594	0.106941	0.778783		-0.897508	-1	0.999702		-0.347543	0.227191	0.0181417		-0.380955	-0.611252	0.0185964		-0.376652	0.159847	0.729552
		-0.414364	-0.759391	-0.0129496		-0.415492	-0.563891	0.208077		-0.408126	-1	1.00386		-0.927645	-0.840374	0.116042		-0.928072	-0.273948	0.368375		-0.929464	-1	0.988656		-0.897523	-0.276537	-0.00963852		-0.897001	0.113422	0.773618		-0.894869	-1	0.999685		-0.341796	0.232719	0.0195731		-0.375216	-0.608288	0.0251939		-0.370869	0.179488	0.724931
		-0.419995	-0.763283	-0.0124354		-0.42112	-0.567199	0.191515		-0.413804	-1	1.00396		-0.929773	-0.83954	0.116133		-0.930193	-0.276045	0.368758		-0.931569	-1	0.988656		-0.894901	-0.273135	-0.0096958		-0.894373	0.119886	0.768177		-0.892193	-1	0.999672		-0.335925	0.238121	0.0210435		-0.369463	-0.605341	0.0314044		-0.365069	0.199129	0.721129
		-0.42561	-0.767134	-0.0119425		-0.426731	-0.570399	0.176222		-0.419465	-1	1.00395		-0.931865	-0.838688	0.11621		-0.932277	-0.278311	0.368937		-0.933638	-1	0.988656		-0.892245	-0.269698	-0.00972186		-0.891709	0.126317	0.76243		-0.889482	-1	0.999665		-0.330068	0.243396	0.0225508		-0.363694	-0.602405	0.0371129		-0.359255	0.218771	0.717947
		-0.431208	-0.770943	-0.011475		-0.432325	-0.573546	0.162253		-0.42511	-1	1.00386		-0.933919	-0.837817	0.116266		-0.934325	-0.280639	0.36889		-0.93567	-1	0.988656		-0.889553	-0.266224	-0.00971046		-0.889011	0.132721	0.756347		-0.886734	-1	0.999666		-0.324262	0.248542	0.0240908		-0.357911	-0.599501	0.0422249		-0.353426	0.238412	0.715154
		-0.436788	-0.774709	-0.0110348		-0.437902	-0.576586	0.149647		-0.430739	-1	1.00369		-0.935937	-0.836924	0.116296		-0.936335	-0.283061	0.368592		-0.937664	-1	0.988656		-0.886826	-0.262711	-0.00965594		-0.886277	0.139109	0.749911		-0.883951	-1	0.999676		-0.318312	0.253559	0.0256578		-0.352114	-0.596612	0.046674		-0.347582	0.258053	0.71251
		-0.442352	-0.778433	-0.0106214		-0.443462	-0.579548	0.138418		-0.436351	-1	1.00348		-0.937918	-0.836004	0.116294		-0.938309	-0.285597	0.368013		-0.939622	-1	0.988656		-0.884064	-0.259155	-0.00955363		-0.883508	0.145455	0.743107		-0.881132	-1	0.999697		-0.312396	0.258449	0.0272451		-0.346304	-0.593742	0.0504263		-0.341724	0.277309	0.709781
		-0.447898	-0.782113	-0.0102315		-0.449005	-0.582456	0.128563		-0.441946	-1	1.00324		-0.939862	-0.835054	0.116255		-0.940245	-0.288187	0.367121		-0.941542	-1	0.988656		-0.881267	-0.255556	-0.00939995		-0.880704	0.151787	0.735935		-0.878278	-1	0.999732		-0.306521	0.263217	0.0288452		-0.340479	-0.590902	0.0534813		-0.335851	0.296565	0.706757
		-0.453426	-0.785747	-0.00986005		-0.45453	-0.585237	0.120056		-0.447524	-1	1.00297		-0.941769	-0.83407	0.116178		-0.942145	-0.290881	0.365885		-0.943425	-1	0.988656		-0.878436	-0.251913	-0.00919267		-0.877865	0.158096	0.728405		-0.875387	-1	0.999784		-0.300562	0.267868	0.0304506		-0.334641	-0.588075	0.0558709		-0.329965	0.315822	0.703257
		-0.458936	-0.789335	-0.00950028		-0.460036	-0.587969	0.112853		-0.453085	-1	1.00269		-0.943639	-0.83305	0.116061		-0.944007	-0.293648	0.364278		-0.94527	-1	0.988656		-0.87557	-0.248225	-0.0089312		-0.874992	0.164379	0.720538		-0.872462	-1	0.999854		-0.294633	0.272407	0.0320538		-0.32879	-0.585275	0.0576575		-0.324064	0.335078	0.699132
		-0.464429	-0.792877	-0.00914494		-0.465525	-0.590627	0.106896		-0.458628	-1	1.0024		-0.945471	-0.831993	0.115907		-0.945832	-0.296463	0.362283		-0.947078	-1	0.988656		-0.872669	-0.244493	-0.00861687		-0.872084	0.170651	0.712374		-0.869501	-1	0.999945		-0.288659	0.27684	0.0336477		-0.322926	-0.582495	0.0589309		-0.31815	0.354334	0.69427
		-0.469903	-0.796373	-0.00878646		-0.470995	-0.59319	0.102113		-0.464153	-1	1.00212		-0.947266	-0.830899	0.115718		-0.947619	-0.299392	0.359892		-0.948848	-1	0.988656		-0.869733	-0.240717	-0.00825328		-0.869142	0.176899	0.703965		-0.866505	-1	1.00006		-0.28275	0.281176	0.0352257		-0.317049	-0.579727	0.0598045		-0.312223	0.37359	0.688593
		-0.475358	-0.799824	-0.00841706		-0.476447	-0.595705	0.0984234		-0.46966	-1	1.00185		-0.949024	-0.829769	0.115498		-0.94937	-0.302366	0.357112		-0.950581	-1	0.988656		-0.866764	-0.236898	-0.00784639		-0.866166	0.183133	0.695383		-0.863474	-1	1.0002		-0.276868	0.285421	0.0367812		-0.31116	-0.576986	0.0604117		-0.306283	0.392385	0.682058
		-0.480795	-0.803231	-0.00802862		-0.48188	-0.598128	0.0957375		-0.475149	-1	1.00159		-0.950744	-0.828605	0.115253		-0.951082	-0.305407	0.353963		-0.952275	-1	0.988656		-0.86376	-0.233039	-0.0074043		-0.863155	0.189357	0.686711		-0.860408	-1	1.00038		-0.270913	0.289584	0.0383084		-0.305258	-0.574252	0.0609005		-0.300329	0.410871	0.674648
		-0.486212	-0.806594	-0.00761253		-0.487294	-0.600483	0.0939644		-0.480619	-1	1.00135		-0.952427	-0.82741	0.11499		-0.952758	-0.308534	0.350483		-0.953932	-1	0.988656		-0.860722	-0.229139	-0.00693658		-0.86011	0.19556	0.678045		-0.857308	-1	1.00058		-0.264908	0.293672	0.0398021		-0.299344	-0.571531	0.0614267		-0.294363	0.429357	0.666355
		-0.491611	-0.809914	-0.00715996		-0.492688	-0.602793	0.093013		-0.486071	-1	1.00112		-0.954072	-0.826184	0.114715		-0.954395	-0.311703	0.346727		-0.955552	-1	0.988656		-0.85765	-0.2252	-0.00645341		-0.857032	0.201756	0.669485		-0.854172	-1	1.00082		-0.258867	0.297694	0.0412585		-0.293419	-0.568823	0.0621457		-0.288385	0.447843	0.657176
		-0.49699	-0.813191	-0.00666278		-0.498063	-0.604993	0.0927962		-0.491504	-1	1.00092		-0.955679	-0.82493	0.114436		-0.955995	-0.314951	0.342765		-0.957133	-1	0.988656		-0.854544	-0.221223	-0.00596485		-0.853919	0.20794	0.661131		-0.851002	-1	1.0011		-0.25288	0.301657	0.0426751		-0.287481	-0.566121	0.0632052		-0.282394	0.46633	0.647112
		-0.502349	-0.816424	-0.006115		-0.503419	-0.607151	0.0932335		-0.496917	-1	1.00073		-0.957249	-0.823649	0.114159		-0.957557	-0.318249	0.338681		-0.958676	-1	0.988656		-0.851405	-0.217208	-0.00548029		-0.850773	0.21411	0.653074		-0.847797	-1	1.00142		-0.246906	0.30557	0.0440517		-0.281533	-0.563429	0.0647358		-0.276391	0.484816	0.636174
		-0.507689	-0.819612	-0.00551395		-0.508754	-0.609246	0.0942532		-0.502311	-1	1.00057		-0.958781	-0.822341	0.113888		-0.959081	-0.321581	0.334566		-0.960181	-1	0.988656		-0.848232	-0.213155	-0.00500812		-0.847593	0.220271	0.645392		-0.844558	-1	1.00177		-0.240962	0.309442	0.0453902		-0.275573	-0.560744	0.0668415		-0.270377	0.503078	0.624393
		-0.513008	-0.822752	-0.00486096		-0.51407	-0.611262	0.0957926		-0.507686	-1	1.00043		-0.960275	-0.821007	0.113625		-0.960568	-0.32498	0.330516		-0.961648	-1	0.988656		-0.845025	-0.209068	-0.00455558		-0.84438	0.226414	0.638149		-0.841285	-1	1.00217		-0.234871	0.313283	0.0466942		-0.269603	-0.558062	0.0695909		-0.264351	0.520442	0.611816
		-0.518308	-0.825843	-0.00416132		-0.519365	-0.613241	0.0977973		-0.513041	-1	1.0003		-0.961731	-0.819647	0.113372		-0.962017	-0.328398	0.326625		-0.963077	-1	0.988656		-0.841785	-0.204947	-0.00412841		-0.841133	0.232537	0.63139		-0.837977	-1	1.0026		-0.228758	0.317101	0.0479687		-0.263622	-0.555384	0.0730124		-0.258314	0.537806	0.598512
		-0.523587	-0.828879	-0.00342336		-0.52464	-0.615148	0.100219		-0.518375	-1	1.0002		-0.963149	-0.818261	0.113127		-0.963427	-0.331845	0.322979		-0.964467	-1	0.988656		-0.838512	-0.200794	-0.00373032		-0.837853	0.238648	0.625149		-0.834636	-1	1.00307		-0.222844	0.320906	0.049219		-0.25763	-0.552707	0.0770935		-0.252265	0.555171	0.584559
		-0.528845	-0.831857	-0.00265711		-0.529894	-0.617008	0.103014		-0.52369	-1	1.00011		-0.96453	-0.81685	0.112888		-0.9648	-0.335316	0.319652		-0.965819	-1	0.988656		-0.835206	-0.196613	-0.00336242		-0.83454	0.244715	0.619442		-0.83126	-1	1.00357		-0.216783	0.324706	0.0504504		-0.251629	-0.55003	0.0817851		-0.246206	0.572535	0.570044
		-0.534082	-0.834774	-0.00187287		-0.535127	-0.618835	0.106139		-0.528984	-1	1.00003		-0.965872	-0.815414	0.112653		-0.966134	-0.338796	0.316698		-0.967133	-1	0.988656		-0.831866	-0.192407	-0.00302309		-0.831194	0.25076	0.614277		-0.827851	-1	1.00409		-0.210591	0.32851	0.0516678		-0.245617	-0.547349	0.087011		-0.240137	0.589899	0.555046
		-0.539298	-0.837628	-0.00108033		-0.540339	-0.620594	0.109554		-0.534257	-1	0.999972		-0.967176	-0.813952	0.112417		-0.96743	-0.342287	0.314148		-0.968408	-1	0.988656		-0.828494	-0.188176	-0.00270817		-0.827816	0.256771	0.609652		-0.824408	-1	1.00464		-0.204531	0.332325	0.0528763		-0.239596	-0.544667	0.0926788		-0.234057	0.607264	0.539623
		-0.544493	-0.84042	-0.000288327		-0.545529	-0.62233	0.113218		-0.53951	-1	0.999924		-0.968441	-0.812466	0.112174		-0.968689	-0.345775	0.312007		-0.969644	-1	0.988656		-0.825089	-0.183922	-0.00241178		-0.824404	0.262725	0.605558		-0.820931	-1	1.00519		-0.198458	0.33616	0.054081		-0.233565	-0.54198	0.0986926		-0.227967	0.623533	0.523803
		-0.549666	-0.843148	0.000495035		-0.550699	-0.624034	0.117087		-0.544741	-1	0.999888		-0.969669	-0.810955	0.111917		-0.969908	-0.349263	0.310253		-0.970842	-1	0.988656		-0.821652	-0.179647	-0.00212717		-0.82096	0.268645	0.601977		-0.817421	-1	1.00573		-0.192288	0.340023	0.055288		-0.227525	-0.539288	0.104963		-0.221867	0.639529	0.507592
		-0.554818	-0.845816	0.00126211		-0.555846	-0.625704	0.121117		-0.549951	-1	0.999862		-0.970858	-0.809422	0.111637		-0.97109	-0.352733	0.308837		-0.972001	-1	0.988656		-0.818182	-0.175351	-0.00184728		-0.817484	0.274491	0.59888		-0.813877	-1	1.00625		-0.186272	0.343922	0.0565035		-0.221476	-0.536594	0.111416		-0.215757	0.655524	0.49099
		-0.559948	-0.848424	0.00200555		-0.560971	-0.627361	0.125264		-0.55514	-1	0.999843		-0.972009	-0.807866	0.111326		-0.972233	-0.35619	0.30769		-0.973121	-1	0.988656		-0.81468	-0.171034	-0.00156496		-0.813976	0.280269	0.596225		-0.8103	-1	1.00673		-0.180158	0.347866	0.0577339		-0.215418	-0.533892	0.117996		-0.209638	0.67152	0.474008
		-0.565056	-0.850976	0.0027184		-0.566075	-0.628997	0.129476		-0.560307	-1	0.999832		-0.973122	-0.80629	0.110976		-0.973338	-0.359628	0.306721		-0.974202	-1	0.988656		-0.811146	-0.166698	-0.00127321		-0.810435	0.286001	0.593964		-0.80669	-1	1.00713		-0.173942	0.351861	0.0589847		-0.209352	-0.531185	0.124671		-0.203509	0.687516	0.456684
		-0.570141	-0.853475	0.00339452		-0.571155	-0.630629	0.133703		-0.565452	-1	0.999827		-0.974196	-0.804696	0.110579		-0.974405	-0.363028	0.305831		-0.975245	-1	0.988656		-0.807579	-0.162343	-0.000965572		-0.806862	0.291598	0.592042		-0.803046	-1	1.00745		-0.167928	0.355917	0.0602613		-0.203277	-0.52847	0.131427		-0.197372	0.703511	0.439087
		-0.575204	-0.855924	0.00402919		-0.576214	-0.632257	0.13789		-0.570575	-1	0.999827		-0.975232	-0.803085	0.11013		-0.975433	-0.366407	0.304919		-0.976248	-1	0.988656		-0.803981	-0.157969	-0.000636391		-0.803258	0.297134	0.590399		-0.79937	-1	1.00763		-0.161839	0.360037	0.0615675		-0.197195	-0.525738	0.138272		-0.191226	0.718916	0.421322
		-0.580244	-0.858327	0.00461961		-0.581249	-0.633892	0.141981		-0.575676	-1	0.99983		-0.976229	-0.801461	0.109623		-0.976422	-0.369739	0.303889		-0.977212	-1	0.988656		-0.800351	-0.153576	-0.000280966		-0.799621	0.30258	0.588976		-0.795661	-1	1.00765		-0.155648	0.364228	0.0629054		-0.191105	-0.522997	0.145224		-0.185072	0.733434	0.403536
		-0.585261	-0.860687	0.00516512		-0.586262	-0.635537	0.145922		-0.580755	-1	0.999837		-0.977187	-0.799823	0.109056		-0.977373	-0.373029	0.302662		-0.978137	-1	0.988656		-0.796689	-0.149166	0.000104351		-0.795953	0.307895	0.587713		-0.791919	-0.998542	1.00746		-0.149521	0.368491	0.0642753		-0.185007	-0.520232	0.152314		-0.178909	0.747952	0.385925
		-0.590256	-0.86301	0.00566729		-0.591252	-0.637194	0.149661		-0.58581	-1	0.999846		-0.978107	-0.79817	0.108426		-0.978285	-0.376293	0.301179		-0.979023	-1	0.988656		-0.792996	-0.144739	0.00052221		-0.792254	0.313145	0.586548		-0.788145	-0.994898	1.00702		-0.143377	0.372831	0.0656756		-0.178902	-0.517445	0.159575		-0.172738	0.762471	0.368722
		-0.595226	-0.865297	0.00612995		-0.596218	-0.638876	0.153151		-0.590843	-1	0.999856		-0.978989	-0.796503	0.107733		-0.979159	-0.379479	0.299408		-0.97987	-1	0.988656		-0.789272	-0.140295	0.000974659		-0.788524	0.318259	0.585419		-0.784338	-0.991253	1.00627		-0.13718	0.37725	0.0671032		-0.172789	-0.514643	0.167041		-0.166559	0.776989	0.352196
		-0.600174	-0.867553	0.00655896		-0.60116	-0.640569	0.156356		-0.595853	-1	0.999868		-0.979832	-0.794822	0.106976		-0.979994	-0.38263	0.297348		-0.980678	-1	0.988656		-0.785517	-0.135835	0.00146354		-0.784762	0.323271	0.584257		-0.780499	-0.987608	1.00517		-0.131085	0.381749	0.0685539		-0.16667	-0.5118	0.174744		-0.160373	0.791507	0.336621
		-0.605097	-0.869777	0.00696142		-0.606079	-0.642288	0.159252		-0.600839	-1	0.99988		-0.980636	-0.793127	0.106155		-0.98079	-0.38573	0.295028		-0.981446	-1	0.988656		-0.78173	-0.131357	0.00199046		-0.780969	0.328215	0.58299		-0.776627	-0.983964	1.00364		-0.124933	0.386332	0.070023		-0.160545	-0.508939	0.182702		-0.15418	0.806026	0.322248
		-0.609997	-0.871972	0.00734446		-0.610974	-0.644022	0.161832		-0.605803	-1	0.999893		-0.981401	-0.791418	0.105272		-0.981548	-0.388753	0.292508		-0.982175	-1	0.988656		-0.777913	-0.126861	0.00255637		-0.777146	0.332989	0.58154		-0.772724	-0.980319	1.00164		-0.118704	0.390997	0.0715055		-0.154413	-0.50605	0.19092		-0.147979	0.81907	0.309278
		-0.614873	-0.874137	0.00771401		-0.615845	-0.645768	0.164109		-0.610742	-1	0.999905		-0.982128	-0.789695	0.104326		-0.982267	-0.391737	0.289874		-0.982865	-1	0.988656		-0.774065	-0.122344	0.00316119		-0.773292	0.337696	0.579824		-0.768789	-0.976674	0.99909		-0.112638	0.395744	0.0729965		-0.148275	-0.503125	0.199376		-0.141772	0.832114	0.297826
		-0.619724	-0.876271	0.00807393		-0.620692	-0.647534	0.166113		-0.615657	-1	0.999917		-0.982816	-0.787956	0.10332		-0.982947	-0.394639	0.287233		-0.983516	-1	0.988656		-0.770186	-0.117805	0.00380372		-0.769407	0.342302	0.577754		-0.764822	-0.970127	0.995934		-0.106466	0.40057	0.0744916		-0.142131	-0.50018	0.208017		-0.135557	0.845158	0.2879
		-0.624551	-0.878374	0.00842579		-0.625514	-0.649306	0.167888		-0.620549	-1	0.999929		-0.983465	-0.7862	0.102255		-0.983588	-0.397476	0.284702		-0.984127	-1	0.988656		-0.766277	-0.113242	0.00448225		-0.765492	0.346773	0.575244		-0.760823	-0.96358	0.992106		-0.100169	0.405471	0.0759865		-0.135981	-0.4972	0.216761		-0.129337	0.858202	0.279392
		-0.629354	-0.880445	0.00876937		-0.630311	-0.651087	0.16949		-0.625416	-1	0.999939		-0.984075	-0.784425	0.101134		-0.984191	-0.40027	0.282406		-0.984699	-1	0.988656		-0.762338	-0.108655	0.00519544		-0.761546	0.351176	0.57221		-0.756793	-0.957033	0.987543		-0.0940562	0.410441	0.0774767		-0.129826	-0.494193	0.225496		-0.12311	0.871246	0.272069
		-0.634131	-0.882485	0.00910348		-0.635084	-0.652878	0.170983		-0.630259	-1	0.999949		-0.984646	-0.78263	0.0999626		-0.984755	-0.402948	0.280465		-0.985232	-1	0.988656		-0.758369	-0.104047	0.00594305		-0.757571	0.355441	0.568578		-0.752732	-0.950487	0.982191		-0.0878771	0.415477	0.0789566		-0.123666	-0.491168	0.234086		-0.116877	0.884291	0.265592
		-0.638884	-0.884494	0.0094266		-0.639831	-0.654673	0.172437		-0.635077	-1	0.999958		-0.985179	-0.780814	0.0987442		-0.985279	-0.405578	0.278988		-0.985725	-1	0.988656		-0.754369	-0.0994171	0.00672622		-0.753566	0.359598	0.56428		-0.74864	-0.94394	0.976		-0.0816092	0.420572	0.0804196		-0.117501	-0.488105	0.242388		-0.110639	0.896468	0.25954
		-0.643611	-0.886477	0.00973736		-0.644553	-0.656476	0.173925		-0.63987	-1	0.999967		-0.985673	-0.77898	0.0974836		-0.985765	-0.408134	0.278063		-0.986179	-1	0.988656		-0.75034	-0.0947701	0.00754718		-0.749531	0.363682	0.559265		-0.744516	-0.937393	0.968934		-0.075511	0.42572	0.0818581		-0.111332	-0.485029	0.250254		-0.104395	0.908067	0.253454
		-0.648313	-0.88844	0.0100348		-0.64925	-0.658283	0.175521		-0.644638	-1	0.999974		-0.986127	-0.777127	0.0961848		-0.986212	-0.41059	0.277753		-0.986593	-1	0.988656		-0.746281	-0.0901101	0.00840849		-0.745466	0.367574	0.55349		-0.740362	-0.92984	0.96097		-0.0692944	0.430917	0.0832641		-0.105158	-0.481933	0.25755		-0.0981459	0.919667	0.246879
		-0.652989	-0.890388	0.0103182		-0.653921	-0.660092	0.177302		-0.64938	-1	0.99998		-0.986543	-0.775259	0.0948503		-0.98662	-0.412995	0.278091		-0.986968	-1	0.988656		-0.742193	-0.0854419	0.00931194		-0.741372	0.371382	0.54693		-0.736177	-0.921616	0.952105		-0.0630401	0.436158	0.0846299		-0.0989798	-0.478813	0.264163		-0.0918918	0.931266	0.239408
		-0.657639	-0.892326	0.0105867		-0.658566	-0.661904	0.179342		-0.654097	-1	0.999986		-0.98692	-0.773378	0.0934814		-0.986989	-0.415298	0.279076		-0.987303	-1	0.988656		-0.738076	-0.0807698	0.010258		-0.737249	0.375067	0.539568		-0.731961	-0.913393	0.942362		-0.0569486	0.441438	0.0859485		-0.0927978	-0.475681	0.270009		-0.085633	0.942865	0.230707
		-0.662264	-0.894261	0.0108384		-0.663185	-0.663714	0.181714		-0.658789	-1	0.999991		-0.987258	-0.771485	0.0920779		-0.987319	-0.417526	0.280671		-0.987598	-1	0.988656		-0.733929	-0.0760979	0.0112454		-0.733096	0.37858	0.531403		-0.727715	-0.90517	0.93179		-0.0506614	0.446753	0.0872143		-0.0866122	-0.472524	0.275038		-0.0793696	0.954465	0.220533
		-0.666862	-0.896197	0.0110704		-0.667778	-0.665519	0.184483		-0.663455	-1	0.999995		-0.987557	-0.769583	0.0906386		-0.98761	-0.419704	0.282809		-0.987854	-1	0.988656		-0.729754	-0.0714299	0.0122715		-0.728915	0.382006	0.522447		-0.723439	-0.896946	0.920467		-0.0443832	0.452099	0.0884238		-0.0804231	-0.469346	0.279237		-0.0731021	0.964877	0.208743
		-0.671434	-0.898135	0.0112789		-0.672345	-0.667308	0.187705		-0.668094	-1	0.999998		-0.987817	-0.767674	0.0891622		-0.987863	-0.42176	0.285397		-0.988071	-1	0.988656		-0.725549	-0.0667687	0.0133323		-0.724705	0.385258	0.512731		-0.719133	-0.888723	0.908495		-0.0383042	0.457475	0.089576		-0.0742309	-0.466154	0.282623		-0.0668305	0.970542	0.19532
		-0.675979	-0.900076	0.0114604		-0.676885	-0.669088	0.191422		-0.672707	-1	1		-0.988038	-0.765756	0.0876476		-0.988076	-0.42377	0.288327		-0.988247	-1	0.988656		-0.721316	-0.062116	0.0144229		-0.720466	0.388382	0.502302		-0.714796	-0.880131	0.895988		-0.0320444	0.462877	0.0906727		-0.0680357	-0.462919	0.285241		-0.0605551	0.976207	0.180378
		-0.680498	-0.902019	0.0116127		-0.681399	-0.670842	0.195661		-0.677294	-1	1		-0.98822	-0.763831	0.086094		-0.98825	-0.42571	0.291479		-0.988384	-1	0.988656		-0.717055	-0.0574725	0.0155384		-0.716199	0.391422	0.491225		-0.71043	-0.870067	0.883061		-0.0258313	0.468303	0.0917173		-0.0618378	-0.459665	0.287159		-0.0542762	0.981872	0.164182
		-0.68499	-0.903964	0.0117346		-0.685885	-0.672571	0.200434		-0.681854	-1	1		-0.988362	-0.7619	0.0845006		-0.988385	-0.427559	0.294732		-0.988482	-1	0.988656		-0.712765	-0.052838	0.0166746		-0.711904	0.394259	0.479585		-0.706034	-0.860002	0.869826		-0.0197175	0.473751	0.0927149		-0.0556375	-0.45638	0.288461		-0.0479939	0.987537	0.147131
		-0.689455	-0.90591	0.0118272		-0.690345	-0.674283	0.205737		-0.686387	-1	1.00001		-0.988466	-0.759962	0.0828676		-0.988481	-0.429364	0.29797		-0.988539	-1	0.988656		-0.708447	-0.0482109	0.0178289		-0.70758	0.39702	0.467481		-0.701609	-0.849937	0.856396		-0.0133939	0.479218	0.0936716		-0.049435	-0.453051	0.289243		-0.0417087	0.993202	0.129726
		-0.693893	-0.907857	0.0118936		-0.694777	-0.675944	0.211557		-0.690893	-1	1.00001		-0.988531	-0.758018	0.081195		-0.988538	-0.43108	0.301089		-0.988557	-1	0.988656		-0.704101	-0.0435894	0.0190003		-0.703228	0.399666	0.455024		-0.697154	-0.839872	0.84289		-0.00718528	0.484698	0.094594		-0.0432305	-0.449699	0.289609		-0.0354206	0.998867	0.112525
		-0.698303	-0.909806	0.0119394		-0.699182	-0.677581	0.217872		-0.695372	-1	1.00001		-0.988557	-0.756064	0.0794828		-0.988556	-0.432733	0.304003		-0.988534	-1	0.988656		-0.699727	-0.0389714	0.0201889		-0.698849	0.402164	0.442335		-0.69267	-0.829808	0.82944		-0.00102957	0.490189	0.0954897		-0.0370244	-0.446297	0.289667		-0.0291299	1	0.0960876
		-0.702686	-0.911757	0.011971		-0.703559	-0.679182	0.224658		-0.699824	-1	1.00001		-0.988544	-0.754099	0.0777307		-0.988535	-0.434344	0.306647		-0.988472	-1	0.988656		-0.695326	-0.0343551	0.0213959		-0.694442	0.40459	0.42954		-0.688157	-0.819743	0.816192		0.00531078	0.495686	0.096367		-0.0308168	-0.442851	0.289523		-0.0228369	1	0.0809318
		-0.707041	-0.91371	0.0119952		-0.707908	-0.680727	0.231892		-0.704248	-1	1.00001		-0.988492	-0.752119	0.0759381		-0.988475	-0.435851	0.308979		-0.98837	-1	0.988656		-0.690897	-0.02974	0.0226221		-0.690008	0.406872	0.41676		-0.683615	-0.808099	0.803308		0.0115113	0.501187	0.0972347		-0.0246079	-0.439375	0.289269		-0.0165418	1	0.0674945
		-0.711368	-0.915668	0.0120172		-0.71223	-0.682243	0.239549		-0.708644	-1	1.00001		-0.9884	-0.750121	0.0741046		-0.988376	-0.437318	0.310978		-0.988229	-1	0.988656		-0.686441	-0.0251265	0.023868		-0.685547	0.409044	0.404113		-0.679044	-0.79606	0.790947		0.0176724	0.506688	0.0981013		-0.0183981	-0.435807	0.288982		-0.0102448	1	0.0561012
		-0.715667	-0.917629	0.0120398		-0.716523	-0.683694	0.247604		-0.713013	-1	1.00001		-0.98827	-0.748102	0.0722301		-0.988238	-0.438725	0.312643		-0.988047	-1	0.988656		-0.681958	-0.0205159	0.0251334		-0.681058	0.411142	0.391709		-0.674444	-0.784021	0.779264		0.0239327	0.512184	0.098975		-0.0121876	-0.432195	0.288706		-0.0039462	1	0.0469435
		-0.719937	-0.919595	0.0120633		-0.720788	-0.68509	0.256031		-0.717353	-1	1.00001		-0.988101	-0.74606	0.0703148		-0.988061	-0.440055	0.313993		-0.987825	-1	0.988656		-0.677448	-0.0159104	0.0264184		-0.676543	0.413049	0.379651		-0.669816	-0.771982	0.768399		0.0300841	0.517671	0.099862		-0.00597656	-0.428517	0.288454		0.00235377	1	0.0400681
		-0.72418	-0.921561	0.0120861		-0.725025	-0.686449	0.264796		-0.721665	-1	1.00001		-0.987893	-0.743993	0.068359		-0.987845	-0.441348	0.315061		-0.987563	-1	0.988656		-0.672911	-0.0113133	0.0277233		-0.672	0.414876	0.368036		-0.66516	-0.759943	0.758477		0.0362625	0.523143	0.100766		0.000234695	-0.424734	0.288204		0.00865487	1	0.035381
		-0.728393	-0.923525	0.0121054		-0.729233	-0.687705	0.273859		-0.725949	-1	1.00001		-0.987645	-0.741903	0.0663636		-0.98759	-0.442568	0.315894		-0.987261	-1	0.988656		-0.668347	-0.00672812	0.0290495		-0.667432	0.416581	0.356949		-0.660475	-0.747905	0.749594		0.0425569	0.528594	0.101685		0.00644594	-0.420895	0.287907		0.0149569	1	0.0326702
		-0.732578	-0.925482	0.0121188		-0.733412	-0.688916	0.283177		-0.730204	-1	1.00001		-0.987359	-0.739791	0.0643294		-0.987296	-0.443735	0.316547		-0.98692	-1	0.988656		-0.663758	-0.0021579	0.0303985		-0.662837	0.418113	0.34647		-0.655762	-0.735042	0.741812		0.048736	0.534016	0.102615		0.0126569	-0.41694	0.2875		0.0212595	1	0.0316395
		-0.736734	-0.927429	0.0121248		-0.737562	-0.690058	0.292705		-0.73443	-1	1		-0.987034	-0.73766	0.0622571		-0.986963	-0.444868	0.317074		-0.986538	-1	0.988656		-0.659142	0.00239475	0.0317714		-0.658215	0.419558	0.336659		-0.651021	-0.720945	0.735146		0.0548639	0.539403	0.103548		0.0188674	-0.412887	0.286917		0.0275626	1	0.0319455
		-0.740861	-0.929363	0.0121223		-0.741683	-0.691104	0.302398		-0.738627	-1	1		-0.98667	-0.735513	0.0601466		-0.986591	-0.445915	0.317529		-0.986117	-1	0.988656		-0.6545	0.00692855	0.0331682		-0.653568	0.420819	0.327565		-0.646253	-0.706848	0.729552		0.0611666	0.544749	0.104472		0.0250772	-0.408771	0.286104		0.0338658	1	0.0332288
		-0.744959	-0.93128	0.0121112		-0.745775	-0.692099	0.312214		-0.742795	-1	1		-0.986266	-0.733351	0.0579972		-0.98618	-0.446924	0.317953		-0.985655	-1	0.988656		-0.649832	0.0114426	0.0345871		-0.648895	0.421937	0.319217		-0.641457	-0.692751	0.724931		0.0673561	0.550051	0.105378		0.0312859	-0.404482	0.285034		0.040169	1	0.0351345
		-0.749027	-0.933175	0.0120912		-0.749837	-0.69299	0.322115		-0.746934	-1	1		-0.985824	-0.731176	0.0558082		-0.98573	-0.447878	0.318379		-0.985154	-1	0.988656		-0.645138	0.015937	0.0360241		-0.644197	0.42296	0.311622		-0.636633	-0.678654	0.721129		0.0734254	0.555306	0.106254		0.0374934	-0.40012	0.283707		0.0464719	1	0.0373243
		-0.753066	-0.935046	0.0120611		-0.75387	-0.693801	0.332064		-0.751044	-1	1		-0.985343	-0.728986	0.0535793		-0.985241	-0.448747	0.318831		-0.984612	-1	0.988656		-0.640419	0.0204134	0.0374733		-0.639473	0.423739	0.304769		-0.631783	-0.664557	0.717947		0.0797183	0.56051	0.107092		0.0436995	-0.395649	0.282152		0.0527742	1	0.0394885
		-0.757075	-0.936888	0.0120193		-0.757873	-0.694557	0.342027		-0.755123	-1	1		-0.984823	-0.726779	0.0513114		-0.984713	-0.449572	0.319321		-0.984031	-1	0.988656		-0.635675	0.0248728	0.038927		-0.634723	0.424422	0.298623		-0.626905	-0.65046	0.715154		0.0859657	0.565663	0.107887		0.0499038	-0.391026	0.280416		0.0590757	1	0.0413601
		-0.761054	-0.938699	0.0119634		-0.761846	-0.695173	0.351963		-0.759173	-1	1		-0.984265	-0.724552	0.0490068		-0.984147	-0.4503	0.31986		-0.98341	-1	0.988656		-0.630906	0.0293169	0.0403764		-0.629949	0.424959	0.293128		-0.622001	-0.634289	0.71251		0.0920858	0.570763	0.108636		0.0561061	-0.386327	0.278557		0.0653762	1	0.0427321
		-0.765003	-0.940477	0.011892		-0.765789	-0.695731	0.361824		-0.763193	-1	1		-0.983667	-0.722303	0.04667		-0.983541	-0.450948	0.320451		-0.982749	-1	0.988656		-0.626111	0.0337479	0.0418125		-0.62515	0.425309	0.288214		-0.617069	-0.618119	0.709781		0.0982841	0.575812	0.109339		0.0623063	-0.381473	0.276628		0.0716755	1	0.0434722
		-0.768922	-0.942222	0.0118045		-0.769702	-0.696203	0.37155		-0.767183	-1	1		-0.98303	-0.720028	0.0443075		-0.982897	-0.451542	0.321102		-0.982048	-1	0.988656		-0.621292	0.038167	0.0432273		-0.620326	0.425567	0.2838		-0.612112	-0.601948	0.706757		0.104468	0.580808	0.109996		0.0685039	-0.376501	0.274675		0.0779732	1	0.0435322
		-0.77281	-0.943932	0.0117031		-0.773585	-0.696558	0.381067		-0.771142	-1	1		-0.982355	-0.717722	0.0419277		-0.982214	-0.451992	0.321821		-0.981308	-1	0.988656		-0.616449	0.0425761	0.044615		-0.615477	0.425648	0.2798		-0.607128	-0.585778	0.703257		0.110638	0.585754	0.11061		0.0746989	-0.371451	0.272727		0.0842692	1	0.0429506
		-0.776668	-0.945608	0.0115924		-0.777436	-0.696854	0.390292		-0.775071	-1	1		-0.981641	-0.715379	0.0395401		-0.981492	-0.45238	0.322628		-0.980527	-1	0.988656		-0.611581	0.0469769	0.0459732		-0.610605	0.425604	0.276126		-0.602118	-0.569607	0.699132		0.116859	0.590649	0.111187		0.0808909	-0.366205	0.270796		0.0905632	1	0.0418525
		-0.780496	-0.947251	0.0114803		-0.781258	-0.697031	0.399137		-0.778969	-1	1		-0.980888	-0.712998	0.0371552		-0.980732	-0.452676	0.323551		-0.979707	-1	0.988656		-0.606689	0.0513713	0.0473028		-0.605708	0.425478	0.272684		-0.597082	-0.553437	0.69427		0.123003	0.595494	0.111732		0.0870797	-0.360881	0.268881		0.096855	1	0.0404438
		-0.784292	-0.948864	0.0113777		-0.785048	-0.69712	0.407511		-0.782836	-1	1		-0.980097	-0.710576	0.0347836		-0.979932	-0.452845	0.32463		-0.978846	-1	0.988656		-0.601773	0.0557603	0.048608		-0.600787	0.425162	0.269385		-0.59202	-0.536069	0.688593		0.129136	0.600288	0.112252		0.0932651	-0.355442	0.266969		0.103144	1	0.0389941
		-0.788058	-0.95045	0.0112979		-0.788807	-0.69715	0.415332		-0.786672	-1	1		-0.979266	-0.708114	0.0324351		-0.979094	-0.45295	0.325914		-0.977946	-1	0.988656		-0.596833	0.0601446	0.0498945		-0.595843	0.424774	0.266139		-0.586932	-0.517902	0.682058		0.13537	0.605033	0.112754		0.0994468	-0.349853	0.265031		0.109431	1	0.0378035
		-0.791792	-0.952011	0.0112552		-0.792535	-0.697033	0.422522		-0.790477	-1	1		-0.978398	-0.705612	0.030119		-0.978218	-0.452926	0.32746		-0.977007	-1	0.988656		-0.59187	0.0645254	0.0511695		-0.590875	0.42428	0.262859		-0.581819	-0.499735	0.674648		0.141478	0.609728	0.113249		0.105625	-0.344191	0.26302		0.115714	1	0.0371541
		-0.795495	-0.953552	0.0112633		-0.796232	-0.696856	0.429014		-0.79425	-1	1		-0.97749	-0.703073	0.0278431		-0.977302	-0.452805	0.329328		-0.976027	-1	0.988656		-0.586884	0.0689032	0.0524407		-0.585884	0.423652	0.259466		-0.576681	-0.481568	0.666355		0.147584	0.614377	0.113747		0.111798	-0.338384	0.260866		0.121995	1	0.0372608
		-0.799167	-0.955075	0.0113342		-0.799898	-0.696591	0.434749		-0.797992	-1	1		-0.976544	-0.7005	0.0256149		-0.976349	-0.452619	0.331579		-0.975008	-1	0.988656		-0.581874	0.0732788	0.0537162		-0.580869	0.42296	0.25589		-0.571517	-0.463401	0.657176		0.153777	0.618979	0.114258		0.117967	-0.332476	0.258482		0.128272	1	0.0382335
		-0.802807	-0.956582	0.0114776		-0.803532	-0.696207	0.439674		-0.801702	-1	1		-0.975559	-0.697896	0.0234407		-0.975356	-0.452271	0.334269		-0.973949	-1	0.988656		-0.576841	0.0776535	0.0550043		-0.575832	0.42214	0.252077		-0.566329	-0.445234	0.647112		0.159902	0.623537	0.114793		0.124132	-0.326501	0.255769		0.134545	1	0.0400588
		-0.806416	-0.958075	0.0116997		-0.807134	-0.695762	0.443751		-0.80538	-1	1		-0.974536	-0.695265	0.0213263		-0.974325	-0.451855	0.337442		-0.97285	-1	0.988656		-0.571785	0.0820287	0.0563133		-0.570772	0.421229	0.247984		-0.561116	-0.426707	0.636174		0.166032	0.628051	0.115362		0.130292	-0.320369	0.252624		0.140814	1	0.0426044
		-0.809993	-0.959552	0.0120037		-0.810704	-0.695195	0.446951		-0.809026	-1	1		-0.973474	-0.69261	0.0192756		-0.973256	-0.451339	0.341124		-0.971711	-1	0.988656		-0.566707	0.0864058	0.057651		-0.565689	0.420256	0.243587		-0.555878	-0.406739	0.624393		0.172154	0.632523	0.115973		0.136446	-0.314181	0.248954		0.147079	1	0.04564
		-0.813537	-0.961015	0.0123904		-0.814242	-0.694536	0.449256		-0.81264	-1	1		-0.972374	-0.689935	0.0172909		-0.972148	-0.450684	0.345323		-0.970533	-1	0.988656		-0.561607	0.090786	0.0590241		-0.560584	0.419135	0.238873		-0.550616	-0.386771	0.611816		0.178325	0.636956	0.116629		0.142595	-0.307909	0.24468		0.15334	1	0.048869
		-0.81705	-0.962463	0.0128578		-0.817749	-0.693815	0.450667		-0.816221	-1	1		-0.971236	-0.687243	0.0153714		-0.971002	-0.449958	0.350027		-0.969314	-1	0.988656		-0.556484	0.0951702	0.0604365		-0.555457	0.417957	0.233839		-0.54533	-0.366804	0.598512		0.184375	0.641353	0.117334		0.148739	-0.30154	0.239752		0.159596	1	0.0519649
		-0.82053	-0.963894	0.0134014		-0.821223	-0.692938	0.4512		-0.819769	-1	1		-0.970059	-0.684534	0.0135132		-0.969818	-0.449085	0.355201		-0.968057	-1	0.988656		-0.55134	0.0995594	0.0618884		-0.550308	0.416693	0.228483		-0.54002	-0.346836	0.584559		0.190395	0.645715	0.118087		0.154876	-0.295125	0.234161		0.165847	1	0.0546071
		-0.823978	-0.965307	0.0140137		-0.824664	-0.691999	0.450894		-0.823285	-1	1		-0.968844	-0.68181	0.0117093		-0.968595	-0.448101	0.360795		-0.966759	-1	0.988656		-0.546173	0.103955	0.0633754		-0.545137	0.415319	0.222804		-0.534686	-0.326869	0.570044		0.196644	0.650042	0.118888		0.161008	-0.288626	0.227942		0.172093	1	0.0565079
		-0.827394	-0.966701	0.0146833		-0.828073	-0.690967	0.449808		-0.826769	-1	1		-0.96759	-0.67907	0.00995041		-0.967334	-0.447041	0.366735		-0.965422	-1	0.988656		-0.540985	0.108357	0.0648891		-0.539945	0.41389	0.2168		-0.529328	-0.306901	0.555046		0.202657	0.654337	0.119736		0.167133	-0.282074	0.221176		0.178333	1	0.0574293
		-0.830777	-0.968075	0.0153957		-0.831449	-0.689811	0.448021		-0.830219	-1	1		-0.966299	-0.676314	0.00822604		-0.966035	-0.445792	0.372935		-0.964045	-1	0.988656		-0.535776	0.112766	0.0664179		-0.534732	0.412354	0.210465		-0.523947	-0.285751	0.539623		0.208656	0.658597	0.12063		0.173251	-0.275484	0.213986		0.184568	1	0.0571959
		-0.834126	-0.969429	0.0161332		-0.834793	-0.688595	0.445627		-0.833636	-1	1		-0.964969	-0.673539	0.00652531		-0.964697	-0.444466	0.37929		-0.962628	-1	0.988656		-0.530545	0.117182	0.0679484		-0.529497	0.410736	0.203793		-0.518542	-0.264306	0.523803		0.214867	0.662822	0.121568		0.179363	-0.268812	0.206522		0.190797	1	0.0557059
		-0.837444	-0.970764	0.0168768		-0.838103	-0.687258	0.442725		-0.837019	-1	1		-0.963601	-0.670742	0.00483804		-0.963322	-0.443026	0.385685		-0.961172	-1	0.988656		-0.525294	0.121605	0.0694665		-0.524241	0.409065	0.196777		-0.513114	-0.242861	0.507592		0.220864	0.667012	0.122548		0.185468	-0.26211	0.198953		0.19702	1	0.0529434
		-0.840727	-0.972079	0.017608		-0.84138	-0.685833	0.439421		-0.84037	-1	1		-0.962196	-0.667919	0.00315574		-0.961908	-0.441436	0.391996		-0.959676	-1	0.988655		-0.520022	0.126032	0.0709586		-0.518965	0.407261	0.189414		-0.507663	-0.221416	0.49099		0.226885	0.671166	0.123567		0.191565	-0.255361	0.191458		0.203237	1	0.0489881
		-0.843978	-0.973374	0.0183106		-0.844624	-0.684348	0.435814		-0.843686	-1	1		-0.960752	-0.665066	0.00147232		-0.960457	-0.439771	0.398095		-0.95814	-1	0.988655		-0.514729	0.130463	0.072413		-0.513668	0.405405	0.181705		-0.502189	-0.199971	0.474008		0.233071	0.675284	0.124622		0.197655	-0.248558	0.184215		0.209447	1	0.0440172
		-0.847196	-0.974646	0.0189723		-0.847835	-0.682722	0.431999		-0.846969	-1	1		-0.95927	-0.662176	-0.00021552		-0.958968	-0.437958	0.403859		-0.956565	-1	0.988655		-0.509416	0.134897	0.0738209		-0.508351	0.403473	0.173655		-0.496693	-0.178526	0.456684		0.239128	0.679368	0.125709		0.203737	-0.241729	0.177395		0.21565	1	0.038295
		-0.85038	-0.975893	0.0195857		-0.851013	-0.681042	0.428061		-0.850218	-1	1		-0.95775	-0.659246	-0.00190844		-0.95744	-0.436032	0.409175		-0.95495	-1	0.988655		-0.504083	0.139332	0.0751782		-0.503014	0.401449	0.165277		-0.491174	-0.156658	0.439087		0.24507	0.683417	0.126825		0.209811	-0.234852	0.171154		0.221846	1	0.032157
		-0.85353	-0.977108	0.0201481		-0.854156	-0.679279	0.424074		-0.853433	-1	1		-0.956193	-0.656271	-0.00360508		-0.955875	-0.434031	0.41395		-0.953296	-1	0.988655		-0.49873	0.14377	0.0764851		-0.497657	0.399382	0.156587		-0.485633	-0.134155	0.421322		0.250994	0.687432	0.127965		0.215876	-0.227945	0.16562		0.228034	1	0.0259901
		-0.856647	-0.978289	0.0206618		-0.857266	-0.677413	0.420102		-0.856614	-1	1		-0.954598	-0.65325	-0.00530269		-0.954273	-0.431838	0.418111		-0.951603	-1	0.988655		-0.493357	0.14821	0.0777461		-0.492281	0.397237	0.147604		-0.48007	-0.111651	0.403536		0.257041	0.691415	0.129122		0.221933	-0.221017	0.160895		0.234215	1	0.0202057
		-0.85973	-0.979432	0.0211328		-0.860342	-0.675494	0.416197		-0.85976	-1	1		-0.952965	-0.650181	-0.00699753		-0.952632	-0.429568	0.421604		-0.94987	-1	0.988655		-0.487965	0.152654	0.0789679		-0.486885	0.395049	0.138352		-0.474485	-0.0891477	0.385925		0.263128	0.695368	0.130293		0.227982	-0.214047	0.157047		0.240388	1	0.0152018
		-0.862779	-0.980533	0.0215696		-0.863385	-0.673474	0.412402		-0.862872	-1	1		-0.951294	-0.647063	-0.00868502		-0.950954	-0.427179	0.424398		-0.948098	-1	0.988655		-0.482554	0.157102	0.0801587		-0.481469	0.39283	0.128859		-0.468879	-0.0666442	0.368722		0.268984	0.69929	0.131474		0.234021	-0.207064	0.154116		0.246553	1	0.0113171
		-0.865794	-0.981591	0.0219816		-0.866393	-0.671378	0.408754		-0.865949	-1	1		-0.949586	-0.643899	-0.0103595		-0.949239	-0.424632	0.426481		-0.946286	-1	0.988655		-0.477123	0.161553	0.0813272		-0.476035	0.390566	0.119161		-0.463251	-0.0441408	0.352196		0.274943	0.703182	0.13266		0.240051	-0.200062	0.152111		0.25271	1	0.00878676
		-0.868775	-0.982602	0.0223786		-0.869367	-0.669233	0.405278		-0.868992	-1	1		-0.947841	-0.640687	-0.0120142		-0.947486	-0.422005	0.427856		-0.944435	-1	0.988655		-0.471674	0.166008	0.0824825		-0.470582	0.388293	0.10931		-0.457602	-0.0216374	0.336621		0.28102	0.707044	0.133851		0.246072	-0.193042	0.151008		0.258858	1	0.00771024
		-0.871721	-0.983566	0.0227701		-0.872306	-0.666967	0.401993		-0.871999	-1	1		-0.946058	-0.637431	-0.0136409		-0.945695	-0.41922	0.428541		-0.942546	-1	0.988655		-0.466206	0.170469	0.0836338		-0.46511	0.386008	0.0993695		-0.451931	0.00143896	0.322248		0.286951	0.710875	0.135046		0.252082	-0.186015	0.150747		0.264998	1	0.00803772
		-0.874633	-0.984482	0.0231645		-0.875211	-0.664654	0.398909		-0.874972	-1	1		-0.944237	-0.634132	-0.0152305		-0.943867	-0.416318	0.428569		-0.940617	-1	0.988655		-0.46072	0.174935	0.0847898		-0.45962	0.383728	0.0894173		-0.44624	0.0245153	0.309278		0.292905	0.714676	0.136243		0.258083	-0.178978	0.151238		0.271128	1	0.00957524
		-0.877511	-0.98535	0.0235693		-0.878082	-0.662271	0.39603		-0.877909	-1	1		-0.94238	-0.630792	-0.0167738		-0.942002	-0.413338	0.427983		-0.938649	-1	0.988656		-0.455215	0.179409	0.0859576		-0.454112	0.381453	0.0795378		-0.440528	0.0475916	0.297826		0.298807	0.718448	0.137442		0.264074	-0.171941	0.152368		0.277249	1	0.0120084
		-0.880353	-0.98617	0.0239906		-0.880918	-0.659799	0.393359		-0.880811	-1	1		-0.940485	-0.627415	-0.0182623		-0.9401	-0.410168	0.426842		-0.936641	-1	0.988656		-0.449693	0.183891	0.0871417		-0.448586	0.379201	0.0698164		-0.434796	0.070668	0.2879		0.304669	0.722192	0.138638		0.270054	-0.164904	0.154009		0.28336	1	0.0149431
		-0.883161	-0.986945	0.0244333		-0.883719	-0.657285	0.390904		-0.883677	-1	1		-0.938553	-0.624002	-0.0196897		-0.938161	-0.406923	0.425218		-0.934595	-1	0.988656		-0.444152	0.188381	0.0883426		-0.443042	0.376976	0.0603318		-0.429044	0.0937443	0.279392		0.310665	0.72591	0.139828		0.276024	-0.157878	0.156025		0.289462	1	0.0179587
		-0.885935	-0.987676	0.0249003		-0.886485	-0.654689	0.388675		-0.886508	-1	1		-0.936584	-0.620554	-0.0210518		-0.936184	-0.403566	0.423188		-0.93251	-1	0.988657		-0.438595	0.192877	0.0895569		-0.437481	0.37477	0.0511509		-0.423271	0.116821	0.272069		0.316552	0.729602	0.141009		0.281983	-0.150861	0.158285		0.295554	1	0.0206627
		-0.888673	-0.988365	0.0253922		-0.889216	-0.652036	0.38669		-0.889303	-1	1		-0.934578	-0.617072	-0.0223479		-0.934171	-0.400056	0.420837		-0.930387	-1	0.988657		-0.43302	0.19738	0.0907772		-0.431903	0.372625	0.0423247		-0.417479	0.139913	0.265592		0.322337	0.733269	0.142176		0.287931	-0.143858	0.160669		0.301635	1	0.0227302
		-0.891376	-0.989012	0.0259065		-0.891913	-0.649345	0.384975		-0.892062	-1	1		-0.932535	-0.613555	-0.0235791		-0.932121	-0.396468	0.418245		-0.928224	-1	0.988658		-0.427427	0.201886	0.0919929		-0.426307	0.37051	0.0338858		-0.411667	0.163016	0.25954		0.328318	0.736909	0.143327		0.293867	-0.136886	0.163075		0.307706	1	0.0239248
		-0.894044	-0.989618	0.0264377		-0.894574	-0.64657	0.383562		-0.894785	-1	1		-0.930456	-0.610002	-0.0247487		-0.930034	-0.392718	0.415487		-0.926023	-1	0.988658		-0.421818	0.206393	0.0931918		-0.420695	0.368438	0.0258482		-0.405836	0.18612	0.253454		0.334151	0.740523	0.144459		0.299791	-0.129934	0.165419		0.313766	1	0.0241051
		-0.896677	-0.990181	0.0269776		-0.897199	-0.643767	0.382485		-0.897472	-1	1		-0.928339	-0.606411	-0.0258607		-0.92791	-0.388842	0.412624		-0.923782	-1	0.988659		-0.416193	0.210903	0.094361		-0.415066	0.366437	0.0182092		-0.399985	0.209223	0.246879		0.339893	0.744108	0.145571		0.305704	-0.123027	0.167634		0.319815	1	0.0232233
		-0.899274	-0.990702	0.0275172		-0.899789	-0.64092	0.381782		-0.900122	-1	1		-0.926186	-0.602782	-0.0269197		-0.92575	-0.384882	0.409708		-0.921504	-1	0.98866		-0.41055	0.215414	0.0954884		-0.40942	0.364474	0.0109538		-0.394116	0.232326	0.239408		0.345846	0.747664	0.146662		0.311605	-0.116167	0.169665		0.325853	1	0.0213239
		-0.901836	-0.991179	0.0280487		-0.902344	-0.638025	0.381493		-0.902735	-1	1		-0.923997	-0.599113	-0.0279296		-0.923553	-0.380702	0.406776		-0.919186	-1	0.988661		-0.404892	0.219927	0.0965633		-0.403759	0.362596	0.00405922		-0.388227	0.255429	0.230707		0.351633	0.751189	0.147731		0.317494	-0.109336	0.17147		0.33188	1	0.0185408
		-0.904362	-0.99161	0.0285665		-0.904863	-0.63511	0.381656		-0.905312	-1	1		-0.921771	-0.595403	-0.0288936		-0.92132	-0.376432	0.403854		-0.91683	-1	0.988662		-0.399218	0.224441	0.0975774		-0.398081	0.360792	-0.00249992		-0.38232	0.278418	0.220533		0.357416	0.75468	0.148778		0.323369	-0.102598	0.173014		0.337894	1	0.0150896
		-0.906853	-0.991996	0.0290679		-0.907346	-0.632159	0.382305		-0.907852	-1	1		-0.919508	-0.591654	-0.0298136		-0.91905	-0.372029	0.400955		-0.914436	-1	0.988663		-0.393528	0.228956	0.0985251		-0.392388	0.359037	-0.00874849		-0.376395	0.300946	0.208743		0.363311	0.758136	0.149801		0.329233	-0.0958996	0.174268		0.343897	1	0.011255
		-0.909307	-0.992338	0.029553		-0.909794	-0.62919	0.383471		-0.910355	-1	1		-0.917209	-0.587866	-0.0306913		-0.916744	-0.367444	0.398089		-0.912003	-1	0.988664		-0.387822	0.233474	0.0994046		-0.386679	0.357418	-0.0147089		-0.370451	0.323475	0.19532		0.369051	0.761553	0.150797		0.335083	-0.0892626	0.175208		0.349888	1	0.00737397
		-0.911726	-0.992637	0.030024		-0.912206	-0.62621	0.385183		-0.912822	-1	1		-0.914874	-0.584044	-0.0315281		-0.914402	-0.362769	0.395257		-0.909531	-1	0.988666		-0.382101	0.237995	0.100218		-0.380955	0.355858	-0.0203995		-0.364489	0.346004	0.180378		0.374711	0.764931	0.151765		0.34092	-0.0827125	0.175817		0.355866	1	0.00381313
		-0.914109	-0.992896	0.030484		-0.914581	-0.623214	0.38747		-0.91525	-1	1		-0.912503	-0.58019	-0.0323259		-0.912023	-0.357915	0.392454		-0.907021	-1	0.988667		-0.376365	0.242522	0.100969		-0.375216	0.354386	-0.0258334		-0.35851	0.368533	0.164182		0.38046	0.768266	0.152703		0.346743	-0.0762072	0.176095		0.361831	1	0.000937731
		-0.916456	-0.993119	0.0309365		-0.916921	-0.620218	0.390357		-0.917642	-1	1		-0.910096	-0.576304	-0.0330867		-0.909609	-0.352928	0.389664		-0.904473	-1	0.988669		-0.370614	0.247054	0.101663		-0.369462	0.353037	-0.0310163		-0.352513	0.391061	0.147131		0.386249	0.771558	0.153609		0.352553	-0.0697936	0.176056		0.367784	1	-0.000927832
		-0.918766	-0.993307	0.0313841		-0.919224	-0.617222	0.393865		-0.919996	-1	1		-0.907653	-0.572389	-0.0338125		-0.907159	-0.347853	0.386859		-0.901887	-1	0.98867		-0.364848	0.251592	0.102307		-0.363694	0.351751	-0.0359431		-0.346498	0.41359	0.129726		0.391825	0.774805	0.154485		0.358349	-0.0634521	0.175735		0.373723	1	-0.00154196
		-0.92104	-0.993463	0.0318279		-0.921491	-0.614234	0.398011		-0.922313	-1	1		-0.905174	-0.568445	-0.0345041		-0.904673	-0.342561	0.383999		-0.899262	-1	0.988672		-0.359068	0.256134	0.102907		-0.357911	0.350593	-0.040596		-0.340466	0.435138	0.112525		0.397535	0.778006	0.155333		0.364131	-0.0571585	0.175186		0.379649	1	-0.000779326
		-0.923278	-0.993588	0.032267		-0.923722	-0.611252	0.402804		-0.924591	-1	1		-0.902659	-0.564472	-0.0351609		-0.902151	-0.33718	0.381034		-0.896599	-1	0.988674		-0.353274	0.260678	0.103469		-0.352114	0.349531	-0.0449447		-0.334418	0.456441	0.0960876		0.403347	0.781156	0.156156		0.369898	-0.0509881	0.174477		0.385561	1	0.0013517
		-0.92548	-0.993679	0.0326997		-0.925916	-0.608288	0.408249		-0.926832	-1	1		-0.900109	-0.56047	-0.03578		-0.899594	-0.331668	0.377907		-0.893898	-1	0.988675		-0.347466	0.26522	0.104		-0.346303	0.348532	-0.0489479		-0.328352	0.477744	0.0809318		0.40889	0.78425	0.15696		0.375651	-0.0448679	0.173676		0.391459	1	0.00470717
		-0.927645	-0.993736	0.0331238		-0.928073	-0.605341	0.414349		-0.929036	-1	1		-0.897523	-0.556438	-0.0363566		-0.897001	-0.325973	0.374561		-0.891159	-1	0.988676		-0.341645	0.269761	0.104509		-0.340479	0.34769	-0.0525588		-0.32227	0.499047	0.0674945		0.414599	0.787286	0.157748		0.381389	-0.0388227	0.172853		0.397343	1	0.00902001
		-0.929773	-0.993755	0.0335378		-0.930194	-0.602405	0.421109		-0.931201	-1	1		-0.894902	-0.552376	-0.0368847		-0.894372	-0.320185	0.370941		-0.888382	-1	0.988677		-0.335809	0.274298	0.105002		-0.334641	0.34691	-0.0557294		-0.316172	0.52035	0.0561012		0.420286	0.790261	0.158524		0.387111	-0.0328798	0.172071		0.403213	1	0.0139284
		-0.931865	-0.993735	0.0339403		-0.932279	-0.599501	0.428536		-0.933328	-1	1		-0.892246	-0.548282	-0.0373578		-0.891709	-0.314206	0.366997		-0.885567	-1	0.988678		-0.329961	0.27883	0.105485		-0.32879	0.346221	-0.0584166		-0.310057	0.541652	0.0469435		0.425727	0.793171	0.159288		0.392819	-0.0269887	0.171379		0.409068	1	0.0190185
		-0.933919	-0.993674	0.0343305		-0.934326	-0.596612	0.436642		-0.935416	-1	1		-0.889554	-0.544153	-0.0377703		-0.88901	-0.308079	0.362688		-0.882714	-1	0.988678		-0.324099	0.283355	0.105963		-0.322926	0.34565	-0.0605858		-0.303926	0.56223	0.0400681		0.431409	0.796015	0.160042		0.398511	-0.0212026	0.170808		0.414908	1	0.0238745
		-0.935937	-0.993569	0.034707		-0.936337	-0.593742	0.445441		-0.937467	-1	1		-0.886827	-0.539988	-0.0381184		-0.886276	-0.301853	0.357985		-0.879823	-1	0.988677		-0.318225	0.287872	0.106439		-0.317049	0.345138	-0.0622154		-0.29778	0.581718	0.035381		0.437127	0.798794	0.160783		0.404187	-0.0154966	0.170368		0.420733	1	0.0281236
		-0.937918	-0.993418	0.0350675		-0.93831	-0.590902	0.454952		-0.939478	-1	1		-0.884065	-0.535784	-0.0384003		-0.883507	-0.295375	0.352864		-0.876895	-1	0.988676		-0.312338	0.292378	0.106913		-0.311159	0.344741	-0.0632995		-0.291618	0.601207	0.0326702		0.4426	0.801508	0.161509		0.409848	-0.00984403	0.170053		0.426543	1	0.0314619
		-0.939862	-0.993219	0.0354083		-0.940247	-0.588075	0.4652		-0.941451	-1	1		-0.881268	-0.531542	-0.038617		-0.880703	-0.288795	0.347308		-0.873929	-1	0.988674		-0.306439	0.296872	0.107384		-0.305258	0.34443	-0.06385		-0.285441	0.620696	0.0316395		0.448151	0.804156	0.162219		0.415492	-0.00432491	0.169846		0.432337	1	0.0336614
		-0.941769	-0.992972	0.0357244		-0.942146	-0.585275	0.476209		-0.943386	-1	1		-0.878437	-0.527261	-0.0387719		-0.877865	-0.282063	0.341296		-0.870926	-1	0.988672		-0.300527	0.301352	0.107853		-0.299344	0.344177	-0.0638958		-0.279248	0.640184	0.0319455		0.453766	0.806737	0.162909		0.42112	0.00114189	0.169722		0.438115	1	0.0345717
		-0.943639	-0.992676	0.0360101		-0.944008	-0.582495	0.488005		-0.945281	-1	1		-0.87557	-0.522945	-0.0388706		-0.874992	-0.275129	0.334804		-0.867885	-1	0.988668		-0.294604	0.305818	0.108319		-0.293418	0.344069	-0.0634812		-0.273041	0.659673	0.0332288		0.459209	0.80925	0.16358		0.426731	0.00653023	0.169647		0.443877	1	0.0341226
		-0.945471	-0.99233	0.0362603		-0.945833	-0.579727	0.500608		-0.947138	-1	1		-0.872669	-0.518596	-0.0389202		-0.872084	-0.268095	0.327808		-0.864807	-1	0.988662		-0.288669	0.310271	0.108783		-0.287481	0.344022	-0.0626622		-0.266819	0.679162	0.0351345		0.464645	0.811693	0.164232		0.432325	0.011819	0.169582		0.449623	1	0.0323295
		-0.947266	-0.991933	0.0364712		-0.947621	-0.576986	0.51403		-0.948955	-1	1		-0.869734	-0.514216	-0.0389286		-0.869142	-0.260863	0.320285		-0.861692	-1	0.988655		-0.282723	0.314712	0.109245		-0.281533	0.344066	-0.0615027		-0.260583	0.696556	0.0373243		0.47018	0.814067	0.164864		0.437902	0.0170603	0.169481		0.455352	1	0.0292947
		-0.949024	-0.991483	0.0366417		-0.949371	-0.574252	0.528268		-0.950733	-1	1		-0.866765	-0.509807	-0.0389038		-0.866165	-0.253488	0.312224		-0.85854	-1	0.988647		-0.276766	0.319141	0.109711		-0.275573	0.344238	-0.0600716		-0.254333	0.71395	0.0394885		0.475644	0.816372	0.16548		0.443462	0.0222109	0.169293		0.461064	1	0.0252014
		-0.950744	-0.990978	0.0367732		-0.951084	-0.571531	0.543301		-0.952472	-1	1		-0.863761	-0.505372	-0.0388541		-0.863154	-0.246017	0.303623		-0.85535	-1	0.988636		-0.270797	0.323556	0.110182		-0.269603	0.344476	-0.0584402		-0.248068	0.731344	0.0413601		0.48109	0.818609	0.166078		0.449005	0.0273032	0.168958		0.466759	1	0.0203019
		-0.952427	-0.990419	0.0368685		-0.952759	-0.568823	0.559089		-0.954172	-1	1		-0.860723	-0.500913	-0.0387884		-0.86011	-0.238319	0.294495		-0.852124	-1	0.988624		-0.264818	0.327958	0.110667		-0.263622	0.34485	-0.0566787		-0.24179	0.748738	0.0427321		0.486516	0.82078	0.166661		0.45453	0.0323566	0.168409		0.472437	1	0.0149028
		-0.954072	-0.989803	0.0369316		-0.954397	-0.566121	0.575563		-0.955831	-1	1		-0.857651	-0.496435	-0.0387161		-0.857031	-0.230536	0.284875		-0.84886	-1	0.988609		-0.258829	0.332345	0.111171		-0.25763	0.345329	-0.0548534		-0.235499	0.766132	0.0434722		0.491788	0.822885	0.167228		0.460036	0.0373321	0.16758		0.478098	1	0.0093448
		-0.955679	-0.98913	0.036966		-0.955996	-0.563429	0.592632		-0.957452	-1	1		-0.854545	-0.491939	-0.0386476		-0.853918	-0.222626	0.274814		-0.84556	-1	0.988592		-0.252829	0.336719	0.111702		-0.251628	0.345879	-0.0530221		-0.229194	0.783526	0.0435322		0.497235	0.824926	0.16778		0.465525	0.0422837	0.166408		0.48374	1	0.00397303
		-0.957249	-0.9884	0.0369742		-0.957559	-0.560744	0.610184		-0.959032	-1	1		-0.851406	-0.487431	-0.038593		-0.850772	-0.214558	0.264384		-0.842224	-1	0.988573		-0.24682	0.341081	0.112264		-0.245617	0.34661	-0.0512309		-0.222876	0.799724	0.0429506		0.502701	0.826905	0.168316		0.470995	0.0471996	0.16485		0.489365	1	-0.000900539
		-0.958781	-0.987614	0.0369571		-0.959083	-0.558062	0.628087		-0.960572	-1	1		-0.848232	-0.482912	-0.038562		-0.847592	-0.206416	0.253675		-0.83885	-1	0.988551		-0.2408	0.345432	0.112861		-0.239595	0.347414	-0.0495111		-0.216546	0.815126	0.0418525		0.507898	0.828823	0.168837		0.476447	0.0520792	0.162881		0.494971	1	-0.00503402
		-0.960275	-0.986772	0.0369147		-0.960569	-0.555384	0.646198		-0.962072	-1	1		-0.845026	-0.478385	-0.038562		-0.844379	-0.198129	0.242792		-0.83544	-1	0.988526		-0.234771	0.349776	0.113493		-0.233565	0.348329	-0.0478768		-0.210203	0.830527	0.0404438		0.513272	0.830686	0.169347		0.48188	0.0569429	0.160495		0.500559	1	-0.00828021
		-0.961731	-0.985875	0.0368462		-0.962018	-0.552707	0.664361		-0.963532	-1	1		-0.841786	-0.473853	-0.0385973		-0.841132	-0.189746	0.231854		-0.831994	-1	0.988499		-0.228733	0.354112	0.11416		-0.227525	0.349392	-0.0463255		-0.203847	0.845928	0.0389941		0.518648	0.832496	0.169847		0.487294	0.0617788	0.157707		0.506127	1	-0.0105949
		-0.963149	-0.984924	0.0367518		-0.963429	-0.55003	0.682416		-0.964952	-1	1		-0.838513	-0.469316	-0.0386679		-0.837853	-0.181297	0.220997		-0.828511	-1	0.98847		-0.222686	0.358442	0.11486		-0.221476	0.35053	-0.0448407		-0.197479	0.86133	0.0378035		0.523844	0.834254	0.170341		0.492688	0.0665975	0.154541		0.511677	1	-0.0120319
		-0.96453	-0.983921	0.0366329		-0.964801	-0.547349	0.700195		-0.966332	-1	1		-0.835206	-0.464776	-0.0387693		-0.83454	-0.172706	0.210375		-0.824992	-1	0.988438		-0.21663	0.362765	0.115592		-0.215418	0.351816	-0.0433977		-0.1911	0.876731	0.0371541		0.529164	0.835963	0.170831		0.498063	0.0714048	0.151034		0.517208	1	-0.0127271
		-0.965872	-0.982868	0.0364923		-0.966136	-0.544667	0.717534		-0.96767	-1	1		-0.831867	-0.460233	-0.0388927		-0.831194	-0.164066	0.200155		-0.821436	-1	0.988404		-0.210565	0.367083	0.116354		-0.209352	0.353212	-0.0419708		-0.184709	0.891791	0.0372608		0.534367	0.837624	0.171317		0.503419	0.0761859	0.147227		0.522719	1	-0.0128704
		-0.967176	-0.981765	0.0363341		-0.967432	-0.54198	0.734273		-0.968969	-1	1		-0.828495	-0.455683	-0.0390263		-0.827815	-0.155353	0.19052		-0.817845	-1	0.98837		-0.204492	0.371394	0.11714		-0.203277	0.354682	-0.04054		-0.178306	0.905485	0.0382335		0.539479	0.839238	0.171798		0.508754	0.0809565	0.143163		0.52821	1	-0.0126728
		-0.968441	-0.980615	0.0361622		-0.96869	-0.539288	0.750258		-0.970226	-1	1		-0.82509	-0.451127	-0.0391551		-0.824404	-0.146558	0.181658		-0.814217	-1	0.988334		-0.198412	0.375699	0.117945		-0.197195	0.356327	-0.0390967		-0.171892	0.919178	0.0400588		0.544783	0.840803	0.172273		0.51407	0.0857116	0.138884		0.533682	1	-0.0123329
		-0.969669	-0.979418	0.0359799		-0.96991	-0.536594	0.765352		-0.971443	-1	1		-0.821653	-0.446559	-0.0392624		-0.82096	-0.137726	0.173751		-0.810554	-1	0.988299		-0.192323	0.379997	0.118761		-0.191104	0.358038	-0.0376458		-0.165468	0.932872	0.0426044		0.549988	0.842322	0.172739		0.519365	0.090445	0.134425		0.539133	1	-0.0120155
		-0.970858	-0.978177	0.0357887		-0.971091	-0.533892	0.779435		-0.972618	-1	1		-0.818183	-0.441977	-0.0393299		-0.817484	-0.128824	0.166965		-0.806855	-0.997941	0.988264		-0.186226	0.384288	0.119578		-0.185007	0.35985	-0.0362044		-0.159032	0.946565	0.04564		0.555038	0.843793	0.17319		0.52464	0.095167	0.129814		0.544564	1	-0.0118467
		-0.972009	-0.976894	0.035588		-0.972235	-0.531185	0.792415		-0.973753	-1	1		-0.814681	-0.437374	-0.0393392		-0.813975	-0.119882	0.161439		-0.80312	-0.994509	0.988232		-0.180123	0.388573	0.120383		-0.178901	0.361788	-0.0347967		-0.152586	0.960258	0.048869		0.560232	0.845215	0.173624		0.529894	0.0998651	0.125072		0.549974	1	-0.0119232
		-0.973122	-0.97557	0.0353755		-0.97334	-0.52847	0.804229		-0.974846	-1	1		-0.811146	-0.432748	-0.0392722		-0.810434	-0.110912	0.157268		-0.799349	-0.991077	0.988204		-0.174012	0.39285	0.121164		-0.172789	0.36379	-0.0334502		-0.14613	0.973952	0.0519649		0.565416	0.846587	0.174035		0.535127	0.104543	0.120217		0.555363	1	-0.0123185
		-0.974196	-0.974207	0.0351481		-0.974406	-0.525738	0.814846		-0.975899	-1	1		-0.80758	-0.428093	-0.0391128		-0.806861	-0.101894	0.154501		-0.795543	-0.987646	0.988181		-0.167894	0.397122	0.121908		-0.16667	0.365916	-0.0321919		-0.139663	0.979604	0.0546071		0.57044	0.847907	0.174418		0.540339	0.109207	0.115258		0.56073	1	-0.0130802
		-0.975232	-0.972804	0.0349028		-0.975434	-0.522997	0.824265		-0.97691	-1	1		-0.803982	-0.423405	-0.0388465		-0.803257	-0.0928646	0.153134		-0.791701	-0.984214	0.988165		-0.16177	0.401387	0.122603		-0.160545	0.368135	-0.0310465		-0.133187	0.983246	0.0565079		0.575512	0.849174	0.17477		0.545529	0.113833	0.110201		0.566077	1	-0.014221
		-0.976229	-0.971363	0.0346378		-0.976423	-0.520232	0.83251		-0.977879	-1	1		-0.800352	-0.418684	-0.0384614		-0.799621	-0.083817	0.153113		-0.787823	-0.980782	0.988159		-0.155639	0.405646	0.123238		-0.154413	0.370416	-0.0300334		-0.126701	0.986888	0.0574293		0.580584	0.850391	0.175088		0.550699	0.118444	0.105041		0.571401	1	-0.0157067
		-0.977187	-0.96988	0.0343528		-0.977374	-0.517445	0.839624		-0.978807	-1	1		-0.79669	-0.413927	-0.037949		-0.795953	-0.0747558	0.154336		-0.783911	-0.976974	0.988166		-0.149502	0.4099	0.123803		-0.148274	0.372855	-0.0291671		-0.120206	0.990531	0.0571959		0.585562	0.851555	0.175368		0.555846	0.12303	0.0997698		0.576704	1	-0.0174516
		-0.978107	-0.968352	0.0340496		-0.978287	-0.514643	0.845667		-0.979694	-1	1		-0.792997	-0.409132	-0.0373046		-0.792253	-0.0656891	0.156661		-0.779963	-0.971664	0.988188		-0.143359	0.414151	0.12429		-0.142131	0.375359	-0.0284577		-0.113701	0.994173	0.0557059		0.590616	0.852668	0.17561		0.560971	0.127581	0.0943758		0.581985	1	-0.0193226
		-0.978989	-0.966779	0.0337313		-0.97916	-0.5118	0.850706		-0.980539	-1	1		-0.789273	-0.4043	-0.0365281		-0.788523	-0.0566136	0.159911		-0.77598	-0.966353	0.988228		-0.137211	0.4184	0.124697		-0.135981	0.377962	-0.0279143		-0.107188	0.997815	0.0529434		0.595634	0.85373	0.175812		0.566075	0.132113	0.0888462		0.587243	1	-0.0211506
		-0.979832	-0.965159	0.0334021		-0.979996	-0.508939	0.854818		-0.981342	-1	1		-0.785517	-0.39943	-0.0356241		-0.784761	-0.0475335	0.163885		-0.771962	-0.961042	0.98829		-0.131057	0.422647	0.125023		-0.129826	0.380702	-0.0275456		-0.100666	1	0.0489881		0.60048	0.854742	0.175972		0.571155	0.136604	0.0831669		0.592478	1	-0.0227455
		-0.980636	-0.96349	0.0330661		-0.980792	-0.50605	0.858082		-0.982103	-1	1		-0.781731	-0.394523	-0.0346016		-0.780969	-0.0384503	0.168368		-0.767909	-0.955732	0.988377		-0.124898	0.426893	0.125269		-0.123666	0.383512	-0.0273581		-0.0941356	1	0.0440172		0.605434	0.855704	0.17609		0.576214	0.141061	0.0773238		0.597691	1	-0.0239137
		-0.981401	-0.961772	0.0327263		-0.98155	-0.503125	0.860579		-0.982823	-1	1		-0.777914	-0.389581	-0.0334731		-0.777145	-0.0293638	0.17314		-0.763822	-0.950421	0.988495		-0.118734	0.431139	0.125439		-0.117501	0.386465	-0.0273509		-0.0875969	1	0.038295		0.610411	0.856617	0.176164		0.581249	0.145496	0.0713072		0.60288	1	-0.0244779
		-0.982128	-0.960001	0.0323845		-0.982268	-0.50018	0.862388		-0.9835	-1	1		-0.774065	-0.384603	-0.0322535		-0.773291	-0.0202789	0.177987		-0.759699	-0.94511	0.988645		-0.112566	0.435386	0.125536		-0.111332	0.389527	-0.0275107		-0.0810503	1	0.032157		0.615158	0.857482	0.176197		0.586262	0.149865	0.0651152		0.608046	1	-0.0242972
		-0.982816	-0.958176	0.0320421		-0.982949	-0.4972	0.863585		-0.984136	-1	1		-0.770187	-0.379589	-0.0309587		-0.769406	-0.0111964	0.182703		-0.755543	-0.938726	0.988834		-0.106393	0.439635	0.125565		-0.105158	0.392663	-0.0278073		-0.074496	1	0.0259901		0.620027	0.858299	0.176194		0.591252	0.154205	0.0587555		0.613189	1	-0.0232852
		-0.983465	-0.956295	0.0317003		-0.98359	-0.494193	0.864244		-0.984729	-1	1		-0.766278	-0.374539	-0.0296037		-0.765491	-0.00212234	0.187099		-0.751352	-0.932073	0.989064		-0.100215	0.443887	0.12553		-0.0989797	0.395978	-0.0281928		-0.0679343	1	0.0202057		0.624957	0.859069	0.17616		0.596218	0.1585	0.0522451		0.618307	1	-0.0214201
		-0.984075	-0.954356	0.0313606		-0.984192	-0.491168	0.864433		-0.985279	-1	1		-0.762339	-0.369453	-0.0282017		-0.761546	0.00694663	0.191012		-0.747126	-0.925419	0.989341		-0.0940341	0.44814	0.125436		-0.0927978	0.399363	-0.0286059		-0.0613654	1	0.0152018		0.629656	0.85979	0.176103		0.60116	0.162729	0.0456117		0.623402	1	-0.0187472
		-0.984646	-0.952357	0.0310261		-0.984756	-0.488105	0.864212		-0.985788	-1	1		-0.758369	-0.364333	-0.0267629		-0.75757	0.0160038	0.194307		-0.742867	-0.918766	0.989667		-0.0878492	0.452394	0.125291		-0.0866121	0.402852	-0.02898		-0.0547896	1	0.0113171		0.634498	0.860463	0.176031		0.606079	0.166922	0.0388945		0.628472	1	-0.0153701
		-0.985179	-0.950299	0.030701		-0.985281	-0.485029	0.863636		-0.986254	-1	1		-0.75437	-0.35918	-0.0252946		-0.753565	0.0250498	0.196887		-0.738573	-0.912113	0.990046		-0.0816608	0.456648	0.125101		-0.080423	0.40647	-0.029252		-0.0482072	1	0.00878676		0.639322	0.861088	0.175951		0.610974	0.171038	0.0321426		0.633518	1	-0.0114341
		-0.985673	-0.948182	0.0303898		-0.985767	-0.481933	0.862752		-0.986677	-1	1		-0.750341	-0.353997	-0.0238015		-0.74953	0.0340885	0.198693		-0.734246	-0.90546	0.990482		-0.0754691	0.460903	0.124875		-0.0742308	0.410152	-0.0293691		-0.0416184	1	0.00771024		0.643934	0.861666	0.17587		0.615845	0.17509	0.0254117		0.638538	1	-0.00710734
		-0.986127	-0.946006	0.0300966		-0.986214	-0.478813	0.861597		-0.987057	-1	1		-0.746282	-0.348786	-0.0222863		-0.745466	0.0431012	0.199709		-0.729885	-0.898219	0.990975		-0.0692745	0.46516	0.12462		-0.0680356	0.413955	-0.0292955		-0.0350234	1	0.00803772		0.648694	0.862199	0.175791		0.620692	0.1791	0.0187628		0.643534	1	-0.00256232
		-0.986543	-0.943772	0.029824		-0.986622	-0.475681	0.860203		-0.987395	-1	1		-0.742194	-0.34355	-0.0207502		-0.741372	0.0520991	0.199949		-0.72549	-0.890094	0.991526		-0.0630772	0.469419	0.124343		-0.0618378	0.417846	-0.0290159		-0.0284226	1	0.00957524		0.653405	0.862687	0.175717		0.625514	0.182997	0.0122609		0.648504	1	0.00203651
		-0.98692	-0.941481	0.0295722		-0.986991	-0.472524	0.858593		-0.98769	-1	1		-0.738076	-0.338289	-0.019193		-0.737248	0.0610746	0.199448		-0.721061	-0.88197	0.992136		-0.0568773	0.473682	0.124051		-0.0556375	0.421796	-0.0285367		-0.0218161	1	0.0120084		0.658059	0.863131	0.175648		0.630311	0.18685	0.00597398		0.653449	1	0.00653625
		-0.987258	-0.939135	0.0293401		-0.987321	-0.469346	0.856788		-0.987943	-1	1		-0.73393	-0.333006	-0.0176139		-0.733096	0.0700094	0.198257		-0.7166	-0.873846	0.9928		-0.0506753	0.47795	0.123746		-0.049435	0.425893	-0.0278815		-0.0152043	1	0.0149431		0.6627	0.863532	0.175584		0.635084	0.190636	-2.99406e-05		0.658367	1	0.0107912
		-0.987557	-0.936735	0.0291261		-0.987612	-0.466154	0.854803		-0.988152	-1	1		-0.729754	-0.327702	-0.0160114		-0.728914	0.0789208	0.196426		-0.712105	-0.865722	0.993515		-0.0444712	0.482222	0.123431		-0.0432305	0.430051	-0.0270858		-0.00858733	1	0.0179587		0.667261	0.863891	0.175522		0.639831	0.194335	-0.00568495		0.66326	1	0.0146593
		-0.987817	-0.93428	0.0289288		-0.987864	-0.462919	0.852651		-0.988318	-1	1		-0.72555	-0.322375	-0.014384		-0.724704	0.0877797	0.194003		-0.707576	-0.857598	0.994274		-0.0382653	0.486498	0.123106		-0.0370244	0.434299	-0.0261915		-0.00196551	1	0.0206627		0.671842	0.864209	0.175461		0.644553	0.197992	-0.0109303		0.668127	1	0.0180052
		-0.988038	-0.931775	0.0287483		-0.988077	-0.459665	0.850346		-0.98844	-1	1		-0.721317	-0.317027	-0.0127303		-0.720466	0.0965889	0.191035		-0.703015	-0.849474	0.995065		-0.032058	0.490777	0.12277		-0.0308167	0.438672	-0.0252425		0.0046609	1	0.0227302		0.676418	0.864486	0.175395		0.64925	0.201565	-0.0157145		0.672967	1	0.0207112
		-0.98822	-0.929221	0.0285863		-0.988251	-0.45638	0.847901		-0.98852	-1	1		-0.717055	-0.311654	-0.0110494		-0.716198	0.105365	0.187558		-0.698421	-0.839777	0.995876		-0.0258494	0.49506	0.122422		-0.0246079	0.443106	-0.0242841		0.0112917	1	0.0239248		0.680992	0.864722	0.175322		0.653921	0.20508	-0.02		0.67778	1	0.0226952
		-0.988362	-0.926621	0.0284471		-0.988386	-0.453051	0.845331		-0.988556	-1	1		-0.712765	-0.306257	-0.00934105		-0.711903	0.114041	0.183606		-0.693794	-0.83008	0.996689		-0.0196397	0.499344	0.122059		-0.0183981	0.447668	-0.0233625		0.0179265	1	0.0241051		0.68541	0.864917	0.175237		0.658566	0.208556	-0.0237655		0.682566	1	0.0239287
		-0.988466	-0.923978	0.0283366		-0.988482	-0.449699	0.842652		-0.988548	-1	1		-0.708448	-0.300833	-0.00760694		-0.707579	0.122672	0.179218		-0.689134	-0.820383	0.997482		-0.0134293	0.503629	0.121679		-0.0121876	0.452325	-0.0225267		0.0245652	1	0.0232233		0.689851	0.86507	0.175137		0.663185	0.211951	-0.0270063		0.687325	1	0.0244485
		-0.988531	-0.921296	0.0282624		-0.98854	-0.446297	0.839883		-0.988497	-1	1		-0.704102	-0.295383	-0.00585047		-0.703228	0.131234	0.174444		-0.684442	-0.810686	0.998227		-0.00721839	0.507914	0.121281		-0.00597656	0.457046	-0.0218308		0.0312075	1	0.0213239		0.694318	0.865181	0.175018		0.667778	0.21532	-0.0297322		0.692056	1	0.0243551
		-0.988557	-0.918576	0.028232		-0.988558	-0.442851	0.837044		-0.988403	-1	1		-0.699728	-0.28991	-0.00407677		-0.698849	0.139698	0.169353		-0.679717	-0.800989	0.998893		-0.00100717	0.512196	0.120862		0.000234686	0.461928	-0.0213348		0.0378531	1	0.0185408		0.698733	0.865247	0.174876		0.672345	0.218652	-0.0319656		0.696759	1	0.0238011
		-0.988544	-0.915821	0.0282512		-0.988537	-0.439375	0.834156		-0.988264	-1	1		-0.695327	-0.284418	-0.00229213		-0.694442	0.148113	0.164029		-0.67496	-0.791292	0.999441		0.0052041	0.516474	0.120423		0.00644592	0.466872	-0.0211023		0.0445017	1	0.0150896		0.703186	0.865269	0.174708		0.676885	0.221945	-0.0337373		0.701435	1	0.0229693
		-0.988492	-0.913031	0.0283237		-0.988477	-0.435807	0.831241		-0.988082	-1	1		-0.690898	-0.278911	-0.000503505		-0.690007	0.156428	0.158571		-0.67017	-0.780615	0.999827		0.0114152	0.520748	0.11996		0.0126569	0.471909	-0.0211951		0.0511532	1	0.011255		0.70748	0.865245	0.174514		0.681399	0.225222	-0.0350834		0.706082	1	0.022047
		-0.9884	-0.910204	0.0284501		-0.988378	-0.432195	0.82832		-0.987856	-1	1		-0.686442	-0.273393	0.00128211		-0.685546	0.16467	0.153075		-0.665349	-0.769283	1		0.0176258	0.525016	0.119474		0.0188674	0.477065	-0.0216651		0.0578072	1	0.00737397		0.71178	0.865176	0.174295		0.685885	0.22847	-0.0360436		0.710701	1	0.0211994
		-0.98827	-0.907339	0.0286285		-0.988239	-0.428517	0.825415		-0.987586	-1	1		-0.681958	-0.267867	0.00305868		-0.681057	0.172862	0.147641		-0.660496	-0.757952	0.999902		0.0238357	0.529278	0.118963		0.0250771	0.482276	-0.0225482		0.0644635	1	0.00381313		0.716144	0.86506	0.174054		0.690345	0.231701	-0.0366623		0.715291	1	0.0205495
		-0.988101	-0.904432	0.0288552		-0.988062	-0.424734	0.822545		-0.987273	-1	1		-0.677448	-0.262336	0.00482205		-0.676542	0.18094	0.142365		-0.655611	-0.746621	0.999467		0.0300446	0.533533	0.118428		0.0312859	0.487593	-0.0238602		0.0711219	1	0.000937731		0.720457	0.864899	0.173793		0.694777	0.234921	-0.0369901		0.719852	1	0.0201652
		-0.987893	-0.901484	0.0291253		-0.987846	-0.420895	0.819728		-0.986915	-1	1		-0.672912	-0.2568	0.00657068		-0.672	0.188972	0.137345		-0.650694	-0.735289	0.998626		0.0362524	0.537784	0.117871		0.0374934	0.492979	-0.0255972		0.077782	1	-0.000927832		0.724719	0.864694	0.173517		0.699182	0.23812	-0.037084		0.724383	1	0.0200556
		-0.987645	-0.898492	0.0294333		-0.987591	-0.41694	0.816978		-0.986513	-1	1		-0.668348	-0.251263	0.00830576		-0.667431	0.196939	0.13269		-0.645745	-0.723958	0.997299		0.0424588	0.54203	0.117295		0.0436994	0.498409	-0.0277386		0.0844437	1	-0.00154196		0.728892	0.864449	0.173227		0.703559	0.241314	-0.0370055		0.728886	1	0.020177
		-0.987359	-0.895456	0.0297731		-0.987297	-0.412887	0.814303		-0.986067	-1	1		-0.663758	-0.245723	0.0100311		-0.662836	0.204816	0.128519		-0.640765	-0.712299	0.995402		0.0486635	0.546273	0.116706		0.0499037	0.503935	-0.0302506		0.0911066	1	-0.000779326		0.733045	0.864165	0.172925		0.707908	0.244499	-0.0368195		0.733358	1	0.0204473
		-0.987034	-0.892375	0.0301378		-0.986964	-0.408771	0.811709		-0.985577	-1	1		-0.659142	-0.240181	0.0117525		-0.658215	0.212648	0.124957		-0.635754	-0.699328	0.992848		0.0548662	0.550516	0.116109		0.0561061	0.509494	-0.0330902		0.0977706	1	0.0013517		0.737205	0.863846	0.172608		0.71223	0.247677	-0.0365909		0.737801	1	0.0207651
		-0.98667	-0.889247	0.0305194		-0.986592	-0.404482	0.80919		-0.985042	-1	1		-0.6545	-0.234638	0.0134772		-0.653568	0.220387	0.122129		-0.630711	-0.686357	0.989541		0.0610668	0.55476	0.11551		0.0623062	0.515102	-0.036209		0.104435	1	0.00470717		0.741332	0.863497	0.172274		0.716523	0.250852	-0.0363816		0.742213	1	0.0210263
		-0.986266	-0.886071	0.0309085		-0.986181	-0.40012	0.806739		-0.984463	-1	1		-0.649832	-0.229093	0.0152136		-0.648895	0.228052	0.120137		-0.625638	-0.673386	0.985388		0.067265	0.559005	0.114912		0.0685039	0.520772	-0.039557		0.111101	1	0.00902001		0.745344	0.863119	0.171919		0.720788	0.254022	-0.036247		0.746595	1	0.0211354
		-0.985824	-0.882847	0.0312941		-0.985731	-0.395649	0.804338		-0.98384	-1	1		-0.645139	-0.223544	0.0169702		-0.644196	0.235668	0.119052		-0.620533	-0.660416	0.980292		0.0734605	0.563252	0.114317		0.0746988	0.526472	-0.0430829		0.117766	1	0.0139284		0.749398	0.862716	0.171537		0.725025	0.257189	-0.0362323		0.750946	1	0.0210054
		-0.985343	-0.879577	0.0316644		-0.985242	-0.391026	0.801966		-0.983173	-1	1		-0.64042	-0.21799	0.0187551		-0.639472	0.243151	0.11889		-0.615398	-0.647445	0.97416		0.0796531	0.567501	0.113724		0.0808909	0.532231	-0.046732		0.124431	1	0.0190185		0.753545	0.862292	0.171122		0.729233	0.260355	-0.0363688		0.755266	1	0.020551
		-0.984823	-0.876261	0.0320076		-0.984715	-0.386327	0.7996		-0.98246	-1	1		-0.635676	-0.212427	0.0205753		-0.634723	0.25058	0.119607		-0.610233	-0.634474	0.966904		0.0858426	0.57175	0.113129		0.0870797	0.538035	-0.0504438		0.131096	1	0.0238745		0.757515	0.86185	0.170667		0.733412	0.263522	-0.0366734		0.759556	1	0.0196838
		-0.984265	-0.872901	0.0323133		-0.984148	-0.381473	0.797213		-0.981704	-1	1		-0.630906	-0.206853	0.0224356		-0.629948	0.257925	0.121097		-0.605037	-0.620232	0.958445		0.0920287	0.575998	0.112527		0.0932651	0.543871	-0.0541503		0.137761	1	0.0281236		0.761445	0.861394	0.170166		0.737562	0.266691	-0.0371503		0.763813	1	0.0183178
		-0.983667	-0.869496	0.0325735		-0.983543	-0.376501	0.794783		-0.980902	-1	1		-0.626112	-0.201267	0.0243384		-0.625149	0.265163	0.123215		-0.599811	-0.605672	0.948719		0.0982112	0.580244	0.111909		0.0994467	0.549787	-0.0577784		0.144424	1	0.0314619		0.765502	0.86093	0.169613		0.741683	0.269864	-0.0377938		0.768039	1	0.0163874
		-0.983031	-0.866046	0.0327829		-0.982899	-0.371451	0.792287		-0.980056	-1	1		-0.621293	-0.195669	0.0262836		-0.620325	0.272348	0.125787		-0.594554	-0.591113	0.937679		0.10439	0.584487	0.111267		0.105625	0.555738	-0.0612531		0.151086	1	0.0336614		0.769374	0.860462	0.169002		0.745775	0.273049	-0.0385921		0.772233	1	0.013872
		-0.982355	-0.862551	0.032939		-0.982215	-0.366205	0.789704		-0.979165	-1	1		-0.61645	-0.190057	0.0282682		-0.615477	0.279434	0.128633		-0.589268	-0.576553	0.925304		0.110564	0.588727	0.110594		0.111798	0.561739	-0.0645031		0.157747	1	0.0345717		0.773241	0.859994	0.168329		0.749837	0.276241	-0.0395287		0.776395	1	0.0108203
		-0.981641	-0.859012	0.0330413		-0.981494	-0.360881	0.787016		-0.97823	-1	1		-0.611582	-0.184431	0.0302865		-0.610604	0.286454	0.131585		-0.583952	-0.561994	0.911605		0.116734	0.59296	0.109886		0.117967	0.567808	-0.0674669		0.164405	1	0.0341226		0.777201	0.859529	0.16759		0.75387	0.279456	-0.0405836		0.780524	1	0.00736203
		-0.980888	-0.85543	0.0330906		-0.980733	-0.355442	0.784202		-0.977249	-1	1		-0.60669	-0.178792	0.0323301		-0.605707	0.293429	0.134501		-0.578607	-0.547434	0.896632		0.1229	0.597187	0.109137		0.124132	0.57391	-0.0700979		0.171062	1	0.0323295		0.780888	0.85907	0.166782		0.757873	0.282695	-0.0417332		0.784621	1	0.00370221
		-0.980097	-0.851806	0.0330872		-0.979934	-0.349853	0.781246		-0.976223	-1	1		-0.601774	-0.173141	0.0343882		-0.600787	0.300308	0.137275		-0.573232	-0.532267	0.880481		0.12906	0.601407	0.108345		0.130291	0.580075	-0.0723686		0.177716	1	0.0292947		0.784715	0.858619	0.165902		0.761846	0.285952	-0.0429496		0.788685	1	9.81502e-05
		-0.979266	-0.84814	0.033031		-0.979096	-0.344191	0.778131		-0.975153	-1	1		-0.596834	-0.167478	0.036449		-0.595842	0.307151	0.139835		-0.567828	-0.51619	0.863307		0.135216	0.60562	0.10751		0.136446	0.586279	-0.0742711		0.184368	1	0.0252014		0.788624	0.858177	0.16495		0.765789	0.28927	-0.0441993		0.792716	1	-0.00317248
		-0.978398	-0.844436	0.0329211		-0.978219	-0.338384	0.774842		-0.974037	-1	1		-0.591871	-0.161802	0.0385001		-0.590874	0.313941	0.142138		-0.562395	-0.500113	0.845322		0.141366	0.609828	0.106633		0.142595	0.59251	-0.0758162		0.191016	1	0.0203019		0.79226	0.857748	0.163927		0.769702	0.292618	-0.0454406		0.796713	1	-0.00584354
		-0.97749	-0.840694	0.0327561		-0.977304	-0.332476	0.771366		-0.972876	-1	1		-0.586884	-0.156115	0.0405305		-0.585883	0.320661	0.144158		-0.556933	-0.484035	0.826787		0.147511	0.614031	0.105716		0.148739	0.598789	-0.0770288		0.197661	1	0.0149028		0.795935	0.857336	0.162837		0.773585	0.296013	-0.0466237		0.800677	1	-0.00768561
		-0.976544	-0.836914	0.0325353		-0.97635	-0.326501	0.767694		-0.97167	-1	1		-0.581874	-0.150414	0.0425311		-0.580869	0.327346	0.145882		-0.551442	-0.467958	0.80799		0.15365	0.61823	0.104764		0.154876	0.605077	-0.0779418		0.204303	1	0.0093448		0.799661	0.856944	0.161687		0.777436	0.29948	-0.0476918		0.804607	1	-0.00852192
		-0.975559	-0.833094	0.0322589		-0.975358	-0.320369	0.763817		-0.970419	-1	1		-0.576842	-0.144699	0.0444968		-0.575831	0.333961	0.147309		-0.545922	-0.451881	0.789208		0.159782	0.622428	0.103785		0.161008	0.611379	-0.0785908		0.210941	1	0.00397303		0.803273	0.856576	0.160484		0.781258	0.302986	-0.0485853		0.808502	1	-0.00823679
		-0.974536	-0.829234	0.0319294		-0.974327	-0.314181	0.759731		-0.969122	-1	1		-0.571786	-0.138969	0.0464263		-0.570771	0.340521	0.148457		-0.540374	-0.435803	0.770674		0.165909	0.626624	0.102789		0.167133	0.61768	-0.0790117		0.217574	1	-0.000900539		0.806908	0.856236	0.159235		0.785048	0.306571	-0.0492478		0.812364	1	-0.00678004
		-0.973474	-0.82533	0.0315519		-0.973257	-0.307909	0.755434		-0.96778	-1	1		-0.566708	-0.133224	0.0483222		-0.565689	0.347045	0.149368		-0.534798	-0.418285	0.752552		0.172029	0.630818	0.101789		0.173251	0.623975	-0.0792405		0.224203	1	-0.00503402		0.810557	0.855927	0.157948		0.788807	0.310219	-0.0496333		0.81619	1	-0.00416677
		-0.972374	-0.821384	0.031134		-0.97215	-0.30154	0.750923		-0.966393	-1	1		-0.561607	-0.127464	0.0501904		-0.560584	0.353472	0.150113		-0.529193	-0.400767	0.73493		0.178142	0.635008	0.100797		0.179363	0.630248	-0.0793129		0.230828	1	-0.00828021		0.813981	0.855653	0.156629		0.792535	0.313909	-0.0497117		0.819982	1	-0.000470712
		-0.971236	-0.817392	0.0306846		-0.971004	-0.295125	0.7462		-0.96496	-1	1		-0.556485	-0.121688	0.0520399		-0.555457	0.359856	0.150784		-0.523561	-0.383249	0.71782		0.184248	0.639193	0.0998261		0.185468	0.636492	-0.0792615		0.237447	1	-0.0105949		0.817562	0.855417	0.155283		0.796232	0.317707	-0.0494703		0.823738	1	0.00418569
		-0.970059	-0.813355	0.030213		-0.969819	-0.288626	0.741261		-0.963481	-1	1		-0.55134	-0.115897	0.0538816		-0.550308	0.366178	0.151487		-0.5179	-0.365731	0.701176		0.190347	0.64337	0.0988887		0.191565	0.642717	-0.0791139		0.244061	1	-0.0120319		0.821134	0.855219	0.153916		0.799898	0.32155	-0.0489129		0.82746	1	0.00964143
		-0.968844	-0.809271	0.0297274		-0.968596	-0.282074	0.736106		-0.961957	-1	1		-0.546174	-0.110091	0.0557278		-0.545137	0.372409	0.152324		-0.512212	-0.348213	0.684896		0.196438	0.647538	0.097994		0.197655	0.648878	-0.0788906		0.250669	1	-0.0127271		0.824381	0.85506	0.152532		0.803532	0.32546	-0.0480561		0.831145	1	0.015705
		-0.96759	-0.805141	0.0292343		-0.967335	-0.275484	0.730736		-0.960387	-1	1		-0.540986	-0.104269	0.0575916		-0.539945	0.378594	0.153386		-0.506497	-0.330694	0.668838		0.202521	0.651695	0.097149		0.203737	0.655011	-0.0786021		0.257272	1	-0.0128704		0.827875	0.854943	0.151133		0.807134	0.329464	-0.0469247		0.834795	1	0.0221599
		-0.966299	-0.800965	0.0287381		-0.966036	-0.268812	0.725158		-0.958772	-1	1		-0.535777	-0.0984288	0.059486		-0.534731	0.384684	0.154735		-0.500754	-0.312389	0.652826		0.208597	0.65584	0.0963576		0.20981	0.661103	-0.0782451		0.263868	1	-0.0126728		0.831317	0.854866	0.149723		0.810704	0.333515	-0.045549		0.838409	1	0.0287695
		-0.964969	-0.796747	0.0282424		-0.964699	-0.26211	0.719383		-0.957111	-1	1		-0.530546	-0.0925691	0.0614229		-0.529496	0.3907	0.156387		-0.494984	-0.293559	0.636662		0.214664	0.659973	0.0956211		0.215876	0.667138	-0.0778001		0.270458	1	-0.0123329		0.834628	0.854834	0.148303		0.814243	0.337661	-0.0439643		0.841986	1	0.0352853
		-0.963601	-0.792489	0.0277503		-0.963323	-0.255361	0.713432		-0.955404	-1	1		-0.525295	-0.0866892	0.0634133		-0.524241	0.396667	0.158315		-0.489187	-0.274728	0.62013		0.220723	0.664094	0.0949379		0.221933	0.673146	-0.0772308		0.27704	1	-0.0120155		0.838035	0.854847	0.146874		0.817749	0.341881	-0.0422116		0.845526	1	0.04146
		-0.962196	-0.788194	0.0272654		-0.96191	-0.248558	0.707332		-0.953651	-1	1		-0.520023	-0.0807891	0.0654659		-0.518965	0.402508	0.160448		-0.483363	-0.255898	0.603		0.226773	0.668202	0.0943049		0.227981	0.679098	-0.0764866		0.283616	1	-0.0118467		0.841263	0.854909	0.145436		0.821223	0.346151	-0.0403374		0.84903	1	0.0470669
		-0.960752	-0.783868	0.0267914		-0.960458	-0.241729	0.701117		-0.951853	-1	1		-0.51473	-0.0748695	0.0675873		-0.513668	0.408298	0.16269		-0.477512	-0.237067	0.58504		0.232814	0.672298	0.0937182		0.234021	0.685008	-0.0755068		0.290185	1	-0.0119232		0.844462	0.855023	0.14399		0.824664	0.350551	-0.0383926		0.852497	1	0.0519223
		-0.95927	-0.779512	0.0263321		-0.958969	-0.234852	0.694828		-0.950008	-1	0.999999		-0.509417	-0.0689313	0.0697811		-0.508351	0.414011	0.164934		-0.471634	-0.218237	0.566038		0.238846	0.676382	0.0931743		0.240051	0.690889	-0.0742261		0.296745	1	-0.0123185		0.847685	0.855194	0.142536		0.828073	0.355007	-0.0364296		0.855926	1	0.055907
		-0.95775	-0.77513	0.0258904		-0.957442	-0.227945	0.688506		-0.948118	-1	0.999999		-0.504084	-0.0629752	0.0720475		-0.503014	0.419628	0.167078		-0.465731	-0.199186	0.545836		0.244869	0.680455	0.0926708		0.246071	0.696697	-0.0725819		0.303298	1	-0.0130802		0.850908	0.855423	0.141072		0.831449	0.359544	-0.0344966		0.859318	1	0.05898
		-0.956193	-0.770722	0.0254676		-0.955877	-0.221017	0.682196		-0.946182	-1	0.999999		-0.498731	-0.0570022	0.0743831		-0.497657	0.425198	0.169038		-0.459801	-0.179253	0.524365		0.250881	0.684516	0.0922063		0.252082	0.702472	-0.0705208		0.309843	1	-0.014221		0.854016	0.855713	0.139597		0.834792	0.364194	-0.0326336		0.862671	1	0.061175
		-0.954598	-0.76629	0.0250621		-0.954274	-0.214047	0.675943		-0.9442	-1	0.999999		-0.493358	-0.0510147	0.0767806		-0.49228	0.430678	0.170758		-0.453845	-0.159319	0.501662		0.256884	0.688566	0.0917808		0.258083	0.708199	-0.0680054		0.316379	1	-0.0157067		0.857086	0.856064	0.13811		0.838103	0.368901	-0.0308682		0.865987	1	0.0625844
		-0.952965	-0.761834	0.0246695		-0.952634	-0.207064	0.669791		-0.942172	-1	0.999999		-0.487966	-0.0450152	0.0792296		-0.486884	0.436096	0.172202		-0.447863	-0.139386	0.47788		0.262877	0.692606	0.0913953		0.264074	0.713853	-0.0650171		0.322906	1	-0.0174516		0.860299	0.856477	0.13661		0.84138	0.373722	-0.0292135		0.869264	1	0.0633363
		-0.951294	-0.757354	0.0242831		-0.950956	-0.200062	0.663782		-0.940098	-1	0.999999		-0.482554	-0.0390069	0.0817168		-0.481469	0.441472	0.173355		-0.441856	-0.119452	0.453269		0.26886	0.696634	0.0910517		0.270054	0.719468	-0.061558		0.329424	1	-0.0193226		0.863366	0.856956	0.135096		0.844624	0.378629	-0.0276686		0.872503	1	0.0635762
		-0.949586	-0.752849	0.0238946		-0.94924	-0.193042	0.657954		-0.937979	-1	0.999999		-0.477124	-0.032993	0.0842281		-0.476034	0.446751	0.174207		-0.435823	-0.0995187	0.428148		0.274831	0.700652	0.0907531		0.276024	0.724998	-0.0576496		0.335932	1	-0.0211506		0.866315	0.857499	0.13357		0.847835	0.383594	-0.0262221		0.875703	1	0.0634559
		-0.947841	-0.74832	0.0234948		-0.947487	-0.186015	0.65234		-0.935813	-1	0.999999		-0.471675	-0.0269756	0.0867487		-0.470581	0.451992	0.174747		-0.429765	-0.0795852	0.402873		0.280792	0.704656	0.0905041		0.281983	0.730454	-0.0533302		0.342431	1	-0.0227455		0.86935	0.858107	0.132034		0.851012	0.388705	-0.0248581		0.878864	1	0.0631289
		-0.946058	-0.743768	0.0230749		-0.945697	-0.178978	0.64697		-0.933601	-1	0.999999		-0.466207	-0.0209551	0.0892658		-0.46511	0.457177	0.17496		-0.423683	-0.0590105	0.377795		0.286742	0.708643	0.0903103		0.28793	0.735861	-0.0486526		0.348919	1	-0.0239137		0.872312	0.85878	0.130492		0.854156	0.393874	-0.0235639		0.881985	1	0.0627465
		-0.944237	-0.739196	0.022627		-0.943869	-0.171941	0.641868		-0.931343	-1	1		-0.46072	-0.0149306	0.0917685		-0.45962	0.46229	0.174828		-0.417575	-0.0382755	0.353225		0.292681	0.712612	0.0901777		0.293867	0.741124	-0.0436819		0.355397	1	-0.0244779		0.875215	0.859515	0.128945		0.857266	0.399129	-0.0223375		0.885067	1	0.0624488
		-0.94238	-0.734606	0.0221452		-0.942004	-0.164904	0.637054		-0.929039	-1	1		-0.455216	-0.00889973	0.094248		-0.454112	0.467368	0.174337		-0.411443	-0.0175405	0.329421		0.298608	0.716561	0.0901123		0.299791	0.746323	-0.0384948		0.361864	1	-0.0242972		0.878166	0.860309	0.127396		0.860342	0.404498	-0.02119		0.888109	1	0.0623523
		-0.940485	-0.730003	0.021625		-0.940102	-0.157878	0.632543		-0.926688	-1	1		-0.449693	-0.00286005	0.096698		-0.448586	0.472376	0.173479		-0.405286	0.00319449	0.306573		0.304523	0.720488	0.0901193		0.305704	0.751424	-0.0331771		0.36832	1	-0.0232852		0.880965	0.861157	0.125846		0.863385	0.409925	-0.0201417		0.891111	1	0.0625333
		-0.938553	-0.72539	0.0210634		-0.938162	-0.150861	0.628343		-0.924292	-1	1		-0.444153	0.0031912	0.0991134		-0.443042	0.477333	0.172258		-0.399106	0.0239295	0.284818		0.310426	0.724396	0.0902022		0.311605	0.756386	-0.0278202		0.374764	1	-0.0214201		0.883724	0.862053	0.124293		0.866393	0.415468	-0.0192158		0.894073	1	0.0630108
		-0.936584	-0.72077	0.0204581		-0.936186	-0.143858	0.62446		-0.921849	-1	1		-0.438595	0.00925612	0.101491		-0.437481	0.482257	0.170687		-0.392901	0.0446645	0.264242		0.316317	0.728285	0.0903629		0.317493	0.761278	-0.0225157		0.381197	1	-0.0187472		0.886514	0.862991	0.122738		0.869367	0.421102	-0.0184316		0.896994	1	0.0637318
		-0.934578	-0.716145	0.0198067		-0.934173	-0.136886	0.62089		-0.919361	-1	1		-0.43302	0.0153351	0.103828		-0.431902	0.487097	0.16878		-0.386673	0.0655341	0.244902		0.322196	0.732159	0.0906006		0.323369	0.766031	-0.0173486		0.387617	1	-0.0153701		0.889173	0.863965	0.12118		0.872306	0.426796	-0.0177995		0.899874	1	0.0645624
		-0.932535	-0.711514	0.0191072		-0.932122	-0.129934	0.617627		-0.916825	-1	1		-0.427428	0.0214289	0.106123		-0.426306	0.491903	0.166551		-0.380421	0.0866056	0.226829		0.328061	0.736019	0.0909118		0.329232	0.770686	-0.0123898		0.394024	1	-0.0114341		0.891896	0.864966	0.119616		0.875211	0.432645	-0.0173198		0.902713	0.999246	0.0652919
		-0.930456	-0.70688	0.0183586		-0.930035	-0.123027	0.614661		-0.914244	-1	1		-0.421819	0.0275392	0.108376		-0.420694	0.49666	0.164005		-0.374146	0.107677	0.210035		0.333914	0.739867	0.0912901		0.335082	0.775277	-0.0076895		0.400419	1	-0.00710734		0.894659	0.865987	0.118045		0.878082	0.438558	-0.0169859		0.905511	0.99799	0.0656566
		-0.928339	-0.702241	0.0175629		-0.927912	-0.116167	0.611979		-0.911616	-1	1		-0.416193	0.0336689	0.110586		-0.415065	0.501353	0.161135		-0.367847	0.128749	0.194509		0.339754	0.743705	0.0917265		0.340919	0.779722	-0.00327373		0.406801	1	-0.00256232		0.897239	0.86702	0.116464		0.880918	0.444567	-0.0167883		0.908267	0.996734	0.0653769
		-0.926186	-0.697599	0.0167259		-0.925751	-0.109336	0.609566		-0.908942	-1	1		-0.410551	0.0398226	0.112754		-0.409419	0.506013	0.157926		-0.361526	0.14982	0.180196		0.34558	0.747532	0.0922094		0.346743	0.784116	0.000856751		0.413168	1	0.00203651		0.89987	0.868054	0.114868		0.883719	0.450707	-0.0167163		0.910981	0.995477	0.0641998
		-0.923997	-0.692953	0.015857		-0.923554	-0.102598	0.607411		-0.906222	-1	1		-0.404893	0.046005	0.114878		-0.403758	0.510612	0.154362		-0.355182	0.170891	0.166988		0.351392	0.751348	0.0927262		0.352553	0.788433	0.00472337		0.419522	1	0.00653625		0.902556	0.869079	0.113254		0.886485	0.456913	-0.016756		0.913653	0.994221	0.0619354
		-0.921771	-0.688302	0.0149687		-0.921321	-0.0958996	0.605503		-0.903455	-1	1		-0.399218	0.052221	0.116958		-0.39808	0.515168	0.150434		-0.348815	0.191963	0.154732		0.357191	0.755151	0.0932633		0.358349	0.792657	0.00836461		0.425862	1	0.0107912		0.905054	0.870084	0.111618		0.889216	0.463254	-0.0168856		0.916283	0.992965	0.0584783
		-0.919508	-0.683646	0.0140751		-0.919051	-0.0892626	0.603835		-0.900642	-1	1		-0.393528	0.0584751	0.118992		-0.392387	0.519695	0.146153		-0.342427	0.212709	0.143253		0.362976	0.758939	0.093808		0.36413	0.796837	0.0118292		0.432187	1	0.0146593		0.907474	0.871059	0.109957		0.891913	0.469699	-0.0170695		0.918871	0.991675	0.0538139
		-0.917209	-0.678984	0.0131914		-0.916745	-0.0827125	0.6024		-0.897782	-1	1.00001		-0.387822	0.0647697	0.120975		-0.386678	0.524157	0.141551		-0.336016	0.233454	0.132385		0.368746	0.762711	0.0943485		0.369898	0.800933	0.0151689		0.438497	1	0.0180052		0.909794	0.871994	0.108268		0.894574	0.476215	-0.0172535		0.921415	0.990251	0.048014
		-0.914874	-0.674316	0.0123324		-0.914403	-0.0762072	0.601198		-0.894875	-1	1.00001		-0.382101	0.0711054	0.122901		-0.380954	0.528597	0.136679		-0.329583	0.2542	0.121994		0.374501	0.766465	0.0948745		0.37565	0.804972	0.0184306		0.444792	1	0.0207112		0.91224	0.872879	0.106548		0.897199	0.482906	-0.0173642		0.923916	0.988828	0.04122
		-0.912503	-0.669641	0.0115112		-0.912025	-0.0697936	0.600225		-0.891923	-0.998848	1.00001		-0.376365	0.0774804	0.124764		-0.375215	0.533005	0.131609		-0.323128	0.274945	0.111987		0.380242	0.770201	0.0953777		0.381388	0.808974	0.02165		0.451072	1	0.0226952		0.914746	0.873706	0.104798		0.899789	0.489667	-0.0173121		0.926374	0.987404	0.0336236
		-0.910096	-0.664958	0.0107384		-0.90961	-0.0634521	0.599479		-0.888923	-0.996927	1.00001		-0.370614	0.0838933	0.126554		-0.369462	0.537379	0.126424		-0.316652	0.295691	0.10232		0.385968	0.773918	0.0958515		0.387111	0.812893	0.0248465		0.457335	1	0.0239287		0.917015	0.874466	0.103015		0.902344	0.496531	-0.0169982		0.928789	0.985981	0.0254461
		-0.907653	-0.660264	0.0100219		-0.90716	-0.0571585	0.598956		-0.885878	-0.995006	1.00001		-0.364849	0.0903412	0.128264		-0.363693	0.541739	0.12121		-0.310155	0.316436	0.0930035		0.391679	0.777616	0.0962915		0.392819	0.816783	0.0280239		0.463582	1	0.0244485		0.919255	0.875153	0.101201		0.904863	0.503527	-0.016325		0.93116	0.984557	0.0169208
		-0.905174	-0.655559	0.00936632		-0.904674	-0.0509881	0.598646		-0.882785	-0.993085	1.00001		-0.359069	0.0968212	0.129885		-0.357911	0.546076	0.116052		-0.303637	0.336576	0.0841054		0.397374	0.781295	0.0966964		0.398511	0.820631	0.0311734		0.469813	1	0.0243551		0.921518	0.875761	0.0993591		0.907346	0.510585	-0.0152086		0.933486	0.983133	0.00827998
		-0.902659	-0.650841	0.00877352		-0.902152	-0.0448679	0.598534		-0.879647	-0.991164	1.00001		-0.353275	0.103332	0.131411		-0.352114	0.550405	0.111024		-0.297097	0.356311	0.0757275		0.403054	0.784957	0.0970673		0.404187	0.824431	0.0342773		0.476026	1	0.0238011		0.923878	0.876286	0.0974914		0.909794	0.517765	-0.0135908		0.935768	0.981938	-0.000253374
		-0.900109	-0.646111	0.00824267		-0.899595	-0.0388227	0.598602		-0.876461	-0.989244	1.00001		-0.347467	0.109874	0.132836		-0.346303	0.554729	0.106186		-0.290537	0.376047	0.067978		0.408717	0.788605	0.0974073		0.409847	0.828209	0.037309		0.482223	1	0.0229693		0.92609	0.876724	0.0956028		0.912206	0.525026	-0.0114488		0.938006	0.980799	-0.00847416
		-0.897523	-0.641364	0.00777047		-0.897002	-0.0328798	0.598827		-0.87323	-0.986936	1.00001		-0.341645	0.116445	0.134159		-0.340479	0.559051	0.101585		-0.283957	0.395783	0.0609445		0.414365	0.79224	0.0977214		0.415491	0.831943	0.0402322		0.488401	1	0.022047		0.928231	0.877072	0.0936979		0.914581	0.532342	-0.00879953		0.940199	0.97966	-0.0162054
		-0.894902	-0.636599	0.00735143		-0.894374	-0.0269887	0.599185		-0.869952	-0.983082	1.00001		-0.33581	0.123046	0.13538		-0.334641	0.563378	0.0972573		-0.277356	0.415518	0.0546831		0.419996	0.795863	0.0980149		0.421119	0.835647	0.0430006		0.494562	1	0.0211994		0.930482	0.877328	0.0917813		0.916921	0.539777	-0.0056973		0.942346	0.978521	-0.0233107
		-0.892246	-0.631814	0.00697806		-0.89171	-0.0212026	0.599648		-0.866627	-0.979227	1.00001		-0.329961	0.129675	0.136501		-0.328789	0.56771	0.0932317		-0.270736	0.435254	0.0492227		0.42561	0.799475	0.0982934		0.42673	0.839329	0.0455615		0.500704	1	0.0205495		0.932449	0.877493	0.0898576		0.919224	0.547253	-0.00222542		0.944449	0.977383	-0.0297085
		-0.889554	-0.627009	0.00664098		-0.889012	-0.0154966	0.600187		-0.863257	-0.975373	1.00001		-0.3241	0.136331	0.137528		-0.322925	0.572051	0.0895327		-0.264095	0.454701	0.0445775		0.431208	0.803073	0.0985616		0.432324	0.842957	0.0478614		0.506828	1	0.0201652		0.934451	0.877566	0.0879306		0.921491	0.554791	0.00151128		0.946506	0.976244	-0.0353853
		-0.886827	-0.622183	0.0063292		-0.886278	-0.00984403	0.600764		-0.859839	-0.971519	1.00001		-0.318225	0.143012	0.138469		-0.317047	0.576398	0.0861787		-0.257435	0.472993	0.040756		0.436789	0.806657	0.0988232		0.437902	0.846565	0.0498532		0.512933	1	0.0200556		0.936561	0.877548	0.0860036		0.923722	0.562398	0.00539259		0.948517	0.975252	-0.0404014
		-0.884065	-0.61734	0.00603063		-0.883509	-0.00432491	0.601334		-0.856376	-0.967664	1.00001		-0.312338	0.149713	0.139332		-0.311157	0.580751	0.0831779		-0.250755	0.491286	0.0377667		0.442352	0.810227	0.0990789		0.443462	0.850144	0.0515029		0.519018	1	0.020177		0.938528	0.877442	0.0840792		0.925916	0.570037	0.00928727		0.950481	0.974482	-0.0448878
		-0.881268	-0.612479	0.00573324		-0.880705	0.00114189	0.601843		-0.852866	-0.96381	1.00001		-0.306439	0.156434	0.140129		-0.305254	0.585106	0.0805276		-0.244057	0.509578	0.0356175		0.447898	0.813782	0.0993268		0.449005	0.853691	0.0527958		0.525084	1	0.0204473		0.940499	0.877249	0.0821588		0.928073	0.577734	0.0130545		0.9524	0.973712	-0.0490362
		-0.878437	-0.607606	0.0054267		-0.877866	0.00653023	0.602234		-0.84931	-0.959153	1.00001		-0.300528	0.163172	0.14087		-0.299339	0.58946	0.0782147		-0.23734	0.52787	0.034308		0.453426	0.817326	0.0995614		0.45453	0.857226	0.0537408		0.531129	1	0.0207651		0.942423	0.876974	0.0802425		0.930194	0.585465	0.0165433		0.954272	0.972941	-0.0530818
		-0.87557	-0.60272	0.00510403		-0.874993	0.011819	0.602443		-0.845708	-0.954296	1.00001		-0.294605	0.169925	0.141566		-0.293412	0.593808	0.0762206		-0.230604	0.546162	0.0338127		0.458937	0.82086	0.099775		0.460038	0.860743	0.0543721		0.537155	1	0.0210263		0.944278	0.876619	0.0783297		0.932278	0.59322	0.0195949		0.956097	0.972171	-0.0572798
		-0.872669	-0.597825	0.00476278		-0.872085	0.0170603	0.602414		-0.842059	-0.949439	1		-0.28867	0.176695	0.142228		-0.287473	0.598152	0.0745254		-0.22385	0.564455	0.0340607		0.464429	0.824387	0.0999578		0.465527	0.864257	0.0547471		0.543159	1	0.0211354		0.946144	0.876188	0.0764187		0.934326	0.60102	0.0220508		0.957875	0.9714	-0.0618752
		-0.869734	-0.592924	0.00440513		-0.869142	0.0222109	0.602094		-0.838364	-0.944581	0.999999		-0.282724	0.183482	0.142863		-0.281523	0.602489	0.0731144		-0.217078	0.581481	0.0349228		0.469903	0.827906	0.1001		0.470999	0.867768	0.0549424		0.549142	1	0.0210054		0.947981	0.875683	0.074508		0.936336	0.608836	0.0237653		0.959606	0.97063	-0.0670678
		-0.866765	-0.588019	0.00403698		-0.866165	0.0273032	0.601441		-0.834623	-0.939724	0.999993		-0.276766	0.190286	0.143478		-0.275562	0.606821	0.0719816		-0.210288	0.598191	0.0362172		0.475358	0.831418	0.100192		0.476452	0.871291	0.0550458		0.555104	1	0.020551		0.949704	0.875108	0.0725963		0.93831	0.616674	0.0246169		0.961289	0.970087	-0.0729804
		-0.863761	-0.583113	0.00366676		-0.863154	0.0323566	0.600426		-0.830835	-0.934867	0.999986		-0.270798	0.197109	0.144075		-0.26959	0.611151	0.0711282		-0.20348	0.614901	0.0377306		0.480795	0.834923	0.100228		0.481886	0.874825	0.0551477		0.561043	1	0.0196838		0.951424	0.874466	0.070683		0.940246	0.624537	0.0245193		0.962924	0.969544	-0.0796379
		-0.860723	-0.578209	0.00330387		-0.860108	0.0373321	0.599033		-0.827002	-0.929568	0.999977		-0.264819	0.203952	0.144657		-0.263607	0.615481	0.0705577		-0.196656	0.631611	0.0392471		0.486213	0.83842	0.100204		0.487301	0.878373	0.0553326		0.56696	1	0.0183178		0.953041	0.873758	0.0687676		0.942146	0.632412	0.0234287		0.964511	0.969002	-0.0869627
		-0.857651	-0.573309	0.00295743		-0.857029	0.0422837	0.597258		-0.823122	-0.923608	0.999967		-0.258829	0.210817	0.145221		-0.257613	0.619816	0.0702718		-0.189815	0.648322	0.0405732		0.491611	0.841908	0.100121		0.492697	0.88195	0.0556728		0.572854	1	0.0163874		0.954674	0.872984	0.0668496		0.944008	0.640307	0.0213473		0.96605	0.968459	-0.0947894
		-0.854545	-0.568415	0.00263537		-0.853915	0.0471996	0.595101		-0.819196	-0.917647	0.999956		-0.25283	0.217704	0.145764		-0.251609	0.624154	0.0702697		-0.182957	0.665032	0.0415553		0.49699	0.845386	0.0999833		0.498074	0.885541	0.0562231		0.578726	1	0.013872		0.956435	0.872145	0.064928		0.945833	0.648209	0.0183228		0.96754	0.967916	-0.102894
		-0.851406	-0.563526	0.00234422		-0.850768	0.0520792	0.592566		-0.815224	-0.911687	0.999942		-0.24682	0.224614	0.146279		-0.245595	0.628506	0.070548		-0.176082	0.681098	0.0420927		0.502349	0.848852	0.0997965		0.503431	0.889162	0.0570179		0.584573	1	0.0108203		0.957897	0.87124	0.0630016		0.947621	0.656117	0.0144426		0.968982	0.967373	-0.111025
		-0.848232	-0.558639	0.00208911		-0.847587	0.0569429	0.589652		-0.811206	-0.905726	0.999928		-0.240801	0.231549	0.146758		-0.239571	0.632865	0.0710969		-0.169192	0.696199	0.0421455		0.507689	0.852305	0.0995699		0.508768	0.892803	0.0580688		0.590396	1	0.00736203		0.959413	0.870267	0.0610692		0.949372	0.664026	0.00982369		0.970374	0.966847	-0.118929
		-0.845026	-0.553752	0.00187392		-0.844373	0.0617788	0.586359		-0.807141	-0.899766	0.999911		-0.234772	0.238506	0.147193		-0.233538	0.637233	0.0718965		-0.162285	0.711299	0.0417286		0.513009	0.855743	0.0993152		0.514086	0.896458	0.0593657		0.596196	1	0.00370221		0.961065	0.869227	0.0591302		0.951085	0.671929	0.00460164		0.971717	0.966333	-0.126369
		-0.841786	-0.548863	0.00170128		-0.841125	0.0665975	0.582684		-0.803031	-0.893805	0.999893		-0.228734	0.245482	0.147574		-0.227494	0.641616	0.0729143		-0.155363	0.7264	0.0408861		0.518308	0.859165	0.0990463		0.519383	0.900135	0.0608787		0.60197	1	9.81502e-05		0.962375	0.868115	0.0571846		0.95276	0.679825	-0.00108152		0.973011	0.965818	-0.133133
		-0.838513	-0.54397	0.00157251		-0.837844	0.0714048	0.578625		-0.798874	-0.886659	0.999873		-0.222686	0.252475	0.147892		-0.221442	0.646006	0.0741064		-0.148426	0.7415	0.0396565		0.523587	0.862569	0.0987797		0.52466	0.903817	0.0625609		0.607719	1	-0.00317248		0.963776	0.866931	0.0552327		0.954398	0.687701	-0.0070872		0.974254	0.965303	-0.139042
		-0.835206	-0.53907	0.00148772		-0.834529	0.0761859	0.574188		-0.794671	-0.879514	0.999851		-0.21663	0.25948	0.148137		-0.21538	0.650414	0.0754218		-0.141474	0.756601	0.0380457		0.528845	0.865954	0.0985333		0.529916	0.907505	0.0643509		0.613443	1	-0.00584354		0.965237	0.865674	0.0532752		0.955998	0.695566	-0.0132851		0.975448	0.964788	-0.143959
		-0.831867	-0.534159	0.00144581		-0.831182	0.0809565	0.569383		-0.790423	-0.872368	0.999829		-0.210566	0.266492	0.148302		-0.20931	0.654835	0.0768071		-0.134507	0.771701	0.0360189		0.534082	0.86932	0.0983257		0.535152	0.911187	0.0661774		0.61914	1	-0.00768561		0.96645	0.864342	0.0513129		0.957561	0.703403	-0.0195534		0.976591	0.964273	-0.147804
		-0.828495	-0.529235	0.00144434		-0.827802	0.0857116	0.564225		-0.786128	-0.865222	0.999805		-0.204493	0.273508	0.148379		-0.203231	0.659266	0.0782106		-0.127525	0.785154	0.0335122		0.539298	0.872665	0.098174		0.540367	0.914863	0.0679656		0.624812	1	-0.00852192		0.967834	0.862936	0.0493474		0.959086	0.711211	-0.0257783		0.977684	0.963758	-0.150565
		-0.82509	-0.524296	0.00147939		-0.824388	0.090445	0.558729		-0.781787	-0.858076	0.999782		-0.198412	0.280523	0.148365		-0.197144	0.66372	0.0795821		-0.120529	0.798606	0.0304537		0.544493	0.875987	0.0980925		0.54556	0.918518	0.0696445		0.630456	1	-0.00823679		0.969206	0.861456	0.0473805		0.960572	0.718999	-0.0318574		0.978726	0.963239	-0.152302
		-0.821653	-0.519342	0.00154573		-0.820942	0.095167	0.552908		-0.7774	-0.85093	0.999758		-0.192323	0.287534	0.148258		-0.191048	0.668183	0.0808716		-0.113519	0.812058	0.0267847		0.549667	0.879286	0.0980912		0.550733	0.922147	0.0711552		0.636074	1	-0.00678004		0.970321	0.859904	0.0454137		0.962021	0.726721	-0.0377037		0.979717	0.962721	-0.153137
		-0.818183	-0.514373	0.00163731		-0.817464	0.0998651	0.546768		-0.772967	-0.843041	0.999735		-0.186227	0.294538	0.148061		-0.184945	0.672658	0.0820282		-0.106495	0.82551	0.0224766		0.554818	0.882559	0.0981754		0.555884	0.925758	0.0724576		0.641663	1	-0.00416677		0.971586	0.858281	0.0434484		0.963432	0.734408	-0.0432498		0.980657	0.962202	-0.15325
		-0.814681	-0.50939	0.00174821		-0.813953	0.104543	0.540306		-0.768489	-0.834657	0.999714		-0.180123	0.301532	0.14778		-0.178834	0.677148	0.0830033		-0.0994581	0.838962	0.0175397		0.559948	0.885805	0.0983455		0.561013	0.929311	0.0735357		0.647225	1	-0.000470712		0.972812	0.856588	0.0414847		0.964805	0.742044	-0.0484509		0.981545	0.961683	-0.15285
		-0.811146	-0.504394	0.00187363		-0.810409	0.109207	0.533506		-0.763964	-0.826272	0.999695		-0.174012	0.308514	0.147424		-0.172715	0.681646	0.0837588		-0.0924077	0.852414	0.0120217		0.565056	0.889023	0.0985975		0.56612	0.932835	0.0743979		0.652759	1	0.00418569		0.973794	0.854827	0.0395221		0.96614	0.749595	-0.0532865		0.982382	0.961165	-0.152167
		-0.80758	-0.499384	0.00201072		-0.806833	0.113833	0.526345		-0.759394	-0.817888	0.99968		-0.167895	0.315482	0.147005		-0.166589	0.686158	0.0842755		-0.0853445	0.864832	0.00599493		0.570141	0.892213	0.0989236		0.571205	0.936317	0.0750734		0.658264	1	0.00964143		0.974887	0.853	0.0375596		0.967437	0.757099	-0.0577584		0.983167	0.960646	-0.151429
		-0.803982	-0.494358	0.00215915		-0.803225	0.118444	0.518789		-0.754778	-0.809503	0.999671		-0.16177	0.322433	0.146534		-0.160456	0.690679	0.0845569		-0.0782685	0.87656	-0.000460945		0.575204	0.895374	0.0993129		0.576269	0.93973	0.0756063		0.66374	1	0.015705		0.976054	0.851107	0.0355967		0.968695	0.764503	-0.0618848		0.983899	0.960185	-0.150844
		-0.800352	-0.489315	0.00232119		-0.799586	0.12303	0.510804		-0.750116	-0.801119	0.999668		-0.15564	0.329368	0.146026		-0.154315	0.695205	0.0846293		-0.0711802	0.888287	-0.00727294		0.580244	0.898505	0.0997525		0.581309	0.943105	0.0760484		0.669186	1	0.0221599		0.976941	0.849149	0.0336334		0.969916	0.771821	-0.0656921		0.984579	0.959738	-0.150575
		-0.79669	-0.48425	0.00250104		-0.795914	0.127581	0.502364		-0.745409	-0.792484	0.999673		-0.149503	0.336286	0.145492		-0.148168	0.69974	0.0845388		-0.0640797	0.900015	-0.0143798		0.585262	0.901607	0.100228		0.586327	0.946401	0.076453		0.674603	1	0.0287695		0.977797	0.847127	0.0316717		0.971098	0.779081	-0.069206		0.985206	0.959291	-0.150729
		-0.792997	-0.479159	0.00270377		-0.79221	0.132113	0.493445		-0.740657	-0.782848	0.999689		-0.14336	0.343186	0.144944		-0.142015	0.704276	0.084346		-0.0569673	0.911743	-0.0217298		0.590256	0.904679	0.100726		0.591323	0.949627	0.0768679		0.679989	1	0.0352853		0.978902	0.845043	0.0297143		0.972242	0.786185	-0.0724425		0.985781	0.958844	-0.151342
		-0.789273	-0.474039	0.00293411		-0.788475	0.136604	0.484036		-0.73586	-0.773211	0.999718		-0.137212	0.350069	0.144394		-0.135855	0.708813	0.0841174		-0.0498434	0.923471	-0.0292753		0.595227	0.907723	0.101233		0.596295	0.952807	0.0773294		0.685344	1	0.04146		0.979755	0.8429	0.027765		0.973347	0.793224	-0.0754003		0.986302	0.958397	-0.152392
		-0.785517	-0.468885	0.00319553		-0.784708	0.141061	0.474125		-0.731017	-0.763575	0.999762		-0.131058	0.356936	0.143849		-0.129689	0.713346	0.0839189		-0.0427081	0.934824	-0.0369657		0.600174	0.910741	0.101736		0.601245	0.955859	0.0778583		0.690669	1	0.0470669		0.980516	0.840701	0.0258279		0.974414	0.800164	-0.0780564		0.98677	0.95795	-0.153814
		-0.781731	-0.463694	0.00348971		-0.78091	0.145496	0.463704		-0.726129	-0.753939	0.999822		-0.124899	0.363786	0.143318		-0.123517	0.717875	0.083812		-0.0355619	0.944674	-0.0447395		0.605098	0.913732	0.102226		0.606171	0.958855	0.0784565		0.695962	1	0.0519223		0.981378	0.83845	0.0239074		0.975442	0.806968	-0.0803662		0.987184	0.95754	-0.155516
		-0.777914	-0.458464	0.00381666		-0.777081	0.149865	0.452761		-0.721196	-0.744302	0.999903		-0.118735	0.370619	0.142802		-0.117339	0.722392	0.0838522		-0.028405	0.954524	-0.0525149		0.609997	0.916697	0.102697		0.611073	0.961767	0.0791052		0.701223	1	0.055907		0.982098	0.836147	0.0220084		0.976432	0.813704	-0.0822663		0.987544	0.957184	-0.157395
		-0.774065	-0.453193	0.00417536		-0.77322	0.154205	0.441281		-0.716218	-0.734666	1.00001		-0.112566	0.377436	0.142304		-0.111155	0.726891	0.0840876		-0.0212378	0.964374	-0.0601859		0.614873	0.919638	0.103143		0.615952	0.964561	0.0797662		0.706452	1	0.05898		0.982852	0.833797	0.0201361		0.977384	0.820301	-0.0836782		0.98785	0.956828	-0.159343
		-0.770187	-0.447881	0.00456425		-0.769328	0.1585	0.429246		-0.711195	-0.724045	1.00014		-0.106393	0.384236	0.141819		-0.104966	0.731379	0.08456		-0.0140607	0.974224	-0.0676319		0.619725	0.922554	0.103563		0.620808	0.967293	0.0803867		0.711648	1	0.061175		0.983513	0.831401	0.0182953		0.978297	0.826792	-0.0845143		0.988102	0.956472	-0.161252
		-0.766278	-0.442527	0.00498145		-0.765405	0.162729	0.416633		-0.706128	-0.713178	1.00029		-0.100216	0.39102	0.141342		-0.0987718	0.735826	0.0853053		-0.00687398	0.984074	-0.0747413		0.624551	0.925447	0.103958		0.625639	0.9699	0.0809045		0.716811	1	0.0625844		0.984161	0.82896	0.0164897		0.979171	0.833214	-0.0846859		0.988299	0.956116	-0.163022
		-0.762339	-0.43713	0.0054243		-0.761452	0.166922	0.40342		-0.701016	-0.702311	1.00048		-0.0940345	0.397788	0.140865		-0.0925723	0.740251	0.0863544		0.000321961	0.993924	-0.081439		0.629354	0.928316	0.104332		0.630447	0.972408	0.0812528		0.72194	1	0.0633363		0.984771	0.826476	0.0147223		0.980006	0.839462	-0.0841134		0.988441	0.95576	-0.164568
		-0.758369	-0.431689	0.00588896		-0.757467	0.171038	0.389588		-0.695859	-0.691444	1.00071		-0.0878496	0.404539	0.140377		-0.0863678	0.744645	0.087734		0.00752679	0.996407	-0.0877019		0.634131	0.931161	0.104691		0.63523	0.974849	0.0813644		0.727036	1	0.0635762		0.985334	0.823951	0.0129942		0.980803	0.845641	-0.082733		0.988528	0.955404	-0.165845
		-0.75437	-0.4262	0.00636996		-0.753452	0.17509	0.375128		-0.690658	-0.680577	1.00096		-0.0816612	0.411272	0.139865		-0.0801584	0.748988	0.0894658		0.0147402	0.997049	-0.0935582		0.638884	0.93398	0.105043		0.639989	0.97712	0.0811772		0.732097	1	0.0634559		0.985905	0.821386	0.0113057		0.981561	0.851716	-0.0805027		0.988559	0.955103	-0.166859
		-0.750341	-0.420664	0.00685979		-0.749406	0.1791	0.36004		-0.685412	-0.66971	1.00126		-0.0754695	0.417985	0.139314		-0.0739445	0.753302	0.091564		0.0219617	0.99769	-0.0990739		0.643611	0.93677	0.105396		0.644724	0.979322	0.080643		0.737123	1	0.0631289		0.986329	0.818781	0.00965524		0.98228	0.857653	-0.077409		0.988535	0.954802	-0.167677
		-0.746282	-0.415079	0.007349		-0.74533	0.182997	0.344347		-0.680122	-0.658356	1.00159		-0.0692749	0.42468	0.138712		-0.0677259	0.757556	0.0940312		0.0291911	0.998332	-0.104333		0.648313	0.939529	0.105756		0.649434	0.981423	0.0797358		0.742113	1	0.0627465		0.986812	0.816136	0.00803991		0.982961	0.863519	-0.0734735		0.988456	0.954501	-0.168419
		-0.742194	-0.409442	0.00782676		-0.741223	0.18685	0.328089		-0.674788	-0.64627	1.00197		-0.0630776	0.431356	0.138046		-0.061503	0.76176	0.0968544		0.036428	0.998974	-0.109413		0.652989	0.942256	0.106127		0.654119	0.98339	0.0784591		0.747068	1	0.0624488		0.987155	0.81345	0.00645513		0.983603	0.869244	-0.0687572		0.98832	0.9542	-0.169235
		-0.738076	-0.403752	0.00828169		-0.737087	0.190636	0.311335		-0.669409	-0.634184	1.00238		-0.0568777	0.438014	0.137305		-0.0552757	0.76593	0.100006		0.0436721	0.999615	-0.114369		0.657639	0.944946	0.106511		0.658779	0.98529	0.0768501		0.751986	1	0.0623523		0.987549	0.810725	0.00489473		0.984205	0.874865	-0.0633632		0.988128	0.953899	-0.170289
		-0.73393	-0.398009	0.00870285		-0.732919	0.194335	0.294171		-0.663987	-0.622098	1.00283		-0.0506757	0.444653	0.136483		-0.0490443	0.770011	0.103448		0.050923	1	-0.11921		0.662264	0.947599	0.106907		0.663414	0.987058	0.0749819		0.756868	1	0.0625333		0.988086	0.807957	0.00335101		0.984769	0.880416	-0.0574359		0.987879	0.953599	-0.171737
		-0.729754	-0.392213	0.00908059		-0.728722	0.197992	0.27671		-0.65852	-0.610013	1.00331		-0.0444716	0.451272	0.135576		-0.0428088	0.774054	0.107144		0.0581803	1	-0.123898		0.666862	0.950212	0.10731		0.668025	0.988725	0.0729623		0.761712	1	0.0630108		0.988288	0.805146	0.00181514		0.985294	0.885796	-0.0511572		0.987574	0.953301	-0.17371
		-0.72555	-0.386365	0.00940749		-0.724495	0.201565	0.259079		-0.65301	-0.597927	1.00382		-0.0382657	0.45787	0.13458		-0.0365694	0.778041	0.111066		0.0654437	1	-0.128364		0.671434	0.952784	0.107718		0.67261	0.990327	0.0709257		0.766519	1	0.0637318		0.988441	0.802289	0.000277557		0.98578	0.891109	-0.0447381		0.987211	0.953005	-0.176306
		-0.721317	-0.380468	0.00967888		-0.720238	0.20508	0.241422		-0.647456	-0.585841	1.00435		-0.0320584	0.464445	0.133498		-0.0303262	0.781951	0.115195		0.0727129	1	-0.132532		0.67598	0.955313	0.108123		0.677169	0.991759	0.0690236		0.771288	1	0.0645624		0.988554	0.799385	-0.00127144		0.986227	0.896322	-0.0384047		0.986792	0.952709	-0.179571
		-0.717055	-0.374523	0.00989297		-0.71595	0.208556	0.223897		-0.641858	-0.572517	1.0049		-0.0258498	0.470996	0.13233		-0.0240793	0.785821	0.119522		0.0799874	1	-0.136342		0.680498	0.957799	0.108519		0.681703	0.993122	0.067414		0.776018	1	0.0652919		0.988524	0.796433	-0.00284103		0.986635	0.901408	-0.0323819		0.986315	0.952414	-0.183485
		-0.712765	-0.368532	0.0100503		-0.711633	0.211951	0.206673		-0.636216	-0.559193	1.00544		-0.0196401	0.477521	0.131083		-0.0178287	0.789611	0.124047		0.0872671	1	-0.139762		0.68499	0.960237	0.1089		0.686212	0.994381	0.0662512		0.78071	1	0.0656566		0.988536	0.79343	-0.00443915		0.987003	0.90643	-0.0268787		0.98578	0.952118	-0.187965
		-0.708448	-0.362493	0.0101533		-0.707286	0.21532	0.189924		-0.630531	-0.545869	1.00597		-0.0134297	0.484018	0.12976		-0.0115746	0.79334	0.128767		0.0945514	1	-0.142778		0.689455	0.962627	0.109259		0.690695	0.995495	0.0656746		0.785361	1	0.0653769		0.988528	0.790374	-0.00607188		0.987333	0.911329	-0.0220746		0.985188	0.951822	-0.192867
		-0.704102	-0.356408	0.010205		-0.70291	0.218652	0.173824		-0.624802	-0.532545	1.00646		-0.00721878	0.490485	0.12837		-0.00531682	0.797029	0.133675		0.10184	1	-0.145386		0.693893	0.964965	0.10959		0.695152	0.996535	0.0658003		0.789973	1	0.0641998		0.98853	0.787263	-0.00774296		0.987623	0.916136	-0.0181073		0.984538	0.951523	-0.198007
		-0.699728	-0.350276	0.0102092		-0.698503	0.221945	0.158544		-0.61903	-0.519221	1.0069		-0.00100756	0.49692	0.12692		0.000944407	0.800621	0.138755		0.109133	1	-0.147581		0.698303	0.967247	0.109886		0.699583	0.997423	0.0667138		0.794545	1	0.0619354		0.988529	0.784095	-0.0094533		0.987875	0.920881	-0.0150629		0.98383	0.95121	-0.203187
		-0.695327	-0.344099	0.0101692		-0.694067	0.225222	0.14424		-0.613215	-0.505897	1.00725		0.00520371	0.503321	0.125419		0.00720907	0.804178	0.143983		0.116429	1	-0.149341		0.702686	0.969471	0.110144		0.703988	0.998188	0.0684656		0.799076	1	0.0584783		0.988528	0.780871	-0.0112007		0.988087	0.925469	-0.0129717		0.983063	0.950898	-0.20821
		-0.690898	-0.337879	0.0100891		-0.689601	0.22847	0.13105		-0.607357	-0.491824	1.00749		0.0114148	0.509684	0.123874		0.0134771	0.807683	0.149331		0.123729	1	-0.150635		0.707041	0.971635	0.110361		0.708368	0.998873	0.0710671		0.803565	1	0.0538139		0.988531	0.777589	-0.01298		0.98826	0.929992	-0.0118057		0.982238	0.950586	-0.212903
		-0.686442	-0.331618	0.00997361		-0.685106	0.231701	0.119086		-0.601455	-0.477251	1.00759		0.0176254	0.516008	0.12229		0.0197485	0.811131	0.15477		0.131032	1	-0.151416		0.711368	0.973737	0.110536		0.712721	0.99934	0.0744893		0.808013	1	0.048014		0.988529	0.77425	-0.0147836		0.988393	0.934419	-0.0114792		0.981354	0.950273	-0.21711
		-0.681958	-0.325319	0.00982893		-0.680581	0.234921	0.10843		-0.595511	-0.462679	1.0075		0.0238353	0.522292	0.120669		0.0260232	0.814555	0.160275		0.138337	1	-0.151641		0.715667	0.975778	0.110671		0.717048	0.999715	0.0786667		0.812419	1	0.04122		0.988534	0.770855	-0.0166022		0.988487	0.938712	-0.0118553		0.980411	0.949961	-0.220697
		-0.677448	-0.318984	0.00966227		-0.676026	0.23812	0.099123		-0.589524	-0.448106	1.00717		0.0300443	0.528534	0.119014		0.0323012	0.817934	0.165827		0.145645	1	-0.151288		0.719937	0.977755	0.110768		0.721348	0.999953	0.0835028		0.816782	1	0.0336236		0.98853	0.767403	-0.018425		0.988542	0.942937	-0.0127573		0.979408	0.949648	-0.223556
		-0.672912	-0.312616	0.00948176		-0.671442	0.241314	0.0911673		-0.583495	-0.433533	1.00657		0.0362521	0.534732	0.117321		0.0385827	0.821288	0.171411		0.152954	1	-0.15037		0.72418	0.979669	0.110832		0.725622	0.999994	0.0888752		0.821103	1	0.0254461		0.988538	0.763894	-0.0202405		0.988557	0.947024	-0.0139833		0.978347	0.949344	-0.225612
		-0.668348	-0.306217	0.00929603		-0.666828	0.244499	0.0845234		-0.577424	-0.418961	1.00564		0.0424584	0.540886	0.115588		0.0448676	0.824625	0.177014		0.160265	1	-0.148944		0.728393	0.981516	0.110869		0.72987	0.999934	0.0946404		0.825379	1	0.0169208		0.988424	0.760326	-0.0220367		0.988533	0.951001	-0.0153174		0.977226	0.949042	-0.226841
		-0.663758	-0.299791	0.00911349		-0.662184	0.247677	0.0791159		-0.57131	-0.404142	1.00432		0.0486631	0.546993	0.11381		0.051156	0.827929	0.182623		0.167577	1	-0.147106		0.732578	0.983294	0.110889		0.734092	0.999665	0.100641		0.829612	1	0.00827998		0.988188	0.7567	-0.0238019		0.98847	0.954905	-0.0165412		0.976044	0.948739	-0.227284
		-0.659142	-0.293341	0.00894099		-0.65751	0.250852	0.0748392		-0.565155	-0.388341	1.00255		0.0548659	0.553053	0.111983		0.0574479	0.831221	0.188218		0.174891	1	-0.144984		0.736734	0.985001	0.110898		0.738286	0.999232	0.106717		0.833801	1	-0.000253374		0.987829	0.75301	-0.0255253		0.988367	0.958613	-0.017448		0.974803	0.948437	-0.227048
		-0.6545	-0.286871	0.00878272		-0.652807	0.254022	0.0715663		-0.558958	-0.372539	1.00027		0.0610664	0.55906	0.110102		0.0637434	0.834497	0.193778		0.182204	1	-0.142721		0.740861	0.986633	0.110905		0.742455	0.998691	0.112719		0.837944	1	-0.00847416		0.98739	0.749252	-0.0271983		0.988224	0.962235	-0.0178582		0.973502	0.948135	-0.226297
		-0.649832	-0.280382	0.00863967		-0.648074	0.257189	0.0691573		-0.55272	-0.356738	0.997422		0.0672646	0.565011	0.108168		0.0700425	0.83775	0.199268		0.189518	1	-0.140454		0.744959	0.988188	0.110915		0.746596	0.997878	0.118516		0.842043	1	-0.0162054		0.987055	0.745422	-0.0288138		0.988041	0.96573	-0.0176324		0.97214	0.947832	-0.225233
		-0.645139	-0.273875	0.00850985		-0.64331	0.260355	0.0674693		-0.546441	-0.340937	0.993931		0.0734602	0.570904	0.106182		0.0763454	0.840992	0.204651		0.196832	1	-0.138294		0.749027	0.989661	0.11093		0.750712	0.996963	0.124007		0.846095	1	-0.0233107		0.986653	0.741513	-0.0303674		0.987819	0.969042	-0.0166805		0.970718	0.94754	-0.224063
		-0.64042	-0.267351	0.00838893		-0.638517	0.263522	0.0663626		-0.54012	-0.325135	0.989739		0.0796528	0.576737	0.104146		0.0826521	0.844209	0.209884		0.204145	1	-0.136298		0.753066	0.991053	0.110952		0.7548	0.995895	0.129124		0.850102	1	-0.0297085		0.986152	0.737518	-0.0318573		0.987557	0.972261	-0.0149671		0.969234	0.947263	-0.222978
		-0.635676	-0.260809	0.00827136		-0.633693	0.266691	0.0657071		-0.533759	-0.309334	0.984789		0.0858423	0.582508	0.102065		0.0889629	0.847408	0.214934		0.211457	1	-0.134464		0.757075	0.99236	0.110977		0.758862	0.994643	0.133836		0.854062	1	-0.0353853		0.985609	0.733428	-0.0332841		0.987256	0.975289	-0.0125129		0.96769	0.946985	-0.222131
		-0.630906	-0.254247	0.00815143		-0.62884	0.269864	0.0653856		-0.527357	-0.292594	0.979029		0.0920284	0.588215	0.0999431		0.095278	0.850594	0.219775		0.218767	1	-0.132742		0.761054	0.993579	0.111003		0.762897	0.993304	0.13814		0.857975	1	-0.0404014		0.985036	0.729236	-0.0346511		0.986914	0.978167	-0.00938964		0.966085	0.946708	-0.221621
		-0.626112	-0.247662	0.00802389		-0.623955	0.273049	0.0652968		-0.520914	-0.275619	0.972417		0.0982108	0.593855	0.0977866		0.101597	0.853746	0.224394		0.226075	1	-0.131061		0.765003	0.994704	0.111025		0.766905	0.991798	0.142063		0.86184	1	-0.0448878		0.984519	0.724931	-0.0359635		0.986532	0.980945	-0.00570907		0.964417	0.946431	-0.221493
		-0.621293	-0.241052	0.00788403		-0.61904	0.276241	0.0653568		-0.514432	-0.258645	0.964923		0.104389	0.599425	0.0956		0.107922	0.856885	0.228785		0.23338	1	-0.129345		0.768922	0.995731	0.111039		0.770886	0.990178	0.145651		0.865657	1	-0.0490362		0.983807	0.720501	-0.037227		0.98611	0.983463	-0.00160905		0.962689	0.946153	-0.221737
		-0.61645	-0.234415	0.00772769		-0.614095	0.279456	0.0655017		-0.507909	-0.24167	0.956537		0.110564	0.604925	0.0933885		0.11425	0.860004	0.232945		0.240682	1	-0.127534		0.772811	0.996657	0.111042		0.774841	0.988482	0.148966		0.869426	1	-0.0530818		0.98308	0.715935	-0.0384477		0.985649	0.985871	0.00276042		0.960898	0.945876	-0.222295
		-0.611582	-0.227748	0.00755143		-0.609118	0.282695	0.0656876		-0.501346	-0.224695	0.947267		0.116734	0.610354	0.0911572		0.120584	0.8631	0.23687		0.247981	1	-0.125582		0.776669	0.997479	0.111028		0.778769	0.986603	0.152082		0.873145	1	-0.0572798		0.982507	0.711218	-0.0396308		0.985146	0.988115	0.00725109		0.959045	0.945667	-0.223067
		-0.60669	-0.221046	0.00735284		-0.60411	0.285952	0.0658889		-0.494744	-0.207721	0.937153		0.122899	0.615712	0.0889116		0.126923	0.866185	0.240546		0.255277	1	-0.12345		0.780496	0.998192	0.110995		0.78267	0.984653	0.155072		0.876815	1	-0.0618752		0.981705	0.706337	-0.0407805		0.984604	0.990125	0.0117299		0.95713	0.945459	-0.223928
		-0.601774	-0.214307	0.00713072		-0.59907	0.28927	0.0660957		-0.488102	-0.190339	0.926262		0.12906	0.620997	0.0866569		0.133268	0.869251	0.243958		0.262567	1	-0.121098		0.784292	0.998794	0.110938		0.786545	0.982595	0.158011		0.880436	1	-0.0670678		0.980862	0.701278	-0.0419001		0.984021	0.992015	0.0160886		0.955153	0.945251	-0.224739
		-0.596834	-0.20753	0.00688521		-0.593999	0.292618	0.0663105		-0.481421	-0.172347	0.914703		0.135216	0.626208	0.0843976		0.139618	0.872304	0.247086		0.269853	1	-0.118485		0.788058	0.999282	0.110857		0.790392	0.980393	0.160962		0.884005	1	-0.0729804		0.980111	0.696026	-0.0429908		0.983397	0.99366	0.02025		0.953113	0.945042	-0.225361
		-0.591871	-0.200713	0.00661817		-0.588895	0.296013	0.066545		-0.474701	-0.154356	0.90263		0.141366	0.631344	0.0821373		0.145975	0.875349	0.249909		0.277134	1	-0.115562		0.791792	0.999648	0.11075		0.794213	0.978117	0.163981		0.887524	1	-0.0796379		0.979216	0.690566	-0.0440524		0.982733	0.995117	0.0241723		0.95101	0.944834	-0.225661
		-0.586884	-0.193856	0.00633346		-0.58376	0.29948	0.0668169		-0.467942	-0.136364	0.890239		0.14751	0.636403	0.0798782		0.152338	0.878381	0.252414		0.284409	1	-0.112281		0.795496	0.99989	0.110618		0.798008	0.975692	0.167105		0.890991	1	-0.0869627		0.978348	0.684886	-0.0450826		0.982028	0.996447	0.0278537		0.948844	0.944625	-0.225514
		-0.581874	-0.186959	0.00603699		-0.578591	0.302986	0.0671443		-0.461144	-0.118372	0.877761		0.153649	0.641384	0.0776213		0.158708	0.88141	0.254592		0.291678	1	-0.108605		0.799167	1	0.110464		0.801775	0.973148	0.17036		0.894406	1	-0.0947894		0.977433	0.678976	-0.0460783		0.981282	0.997466	0.0313317		0.946614	0.94454	-0.224806
		-0.576842	-0.180021	0.00573629		-0.57339	0.306571	0.0675406		-0.454308	-0.10038	0.865438		0.159782	0.646285	0.0753663		0.165085	0.884435	0.25645		0.29894	1	-0.104516		0.802808	0.999975	0.110292		0.805516	0.970525	0.173749		0.897769	1	-0.102894		0.976422	0.672827	-0.0470358		0.980494	0.998362	0.0346773		0.944322	0.944535	-0.223432
		-0.571786	-0.173044	0.00543991		-0.568155	0.310219	0.0680108		-0.447434	-0.0823884	0.853496		0.165908	0.651107	0.0731109		0.17147	0.887458	0.258003		0.306195	1	-0.100028		0.806416	0.999809	0.110107		0.80923	0.967697	0.177257		0.901079	1	-0.111025		0.97543	0.66643	-0.0479513		0.979666	0.999073	0.0379874		0.941966	0.944531	-0.221316
		-0.566708	-0.166032	0.00515665		-0.562886	0.313909	0.0685497		-0.440521	-0.0637044	0.842121		0.172028	0.655848	0.0708509		0.177864	0.890479	0.259277		0.313443	1	-0.0951958		0.809993	0.9995	0.109916		0.812918	0.964789	0.180848		0.904336	1	-0.118929		0.974205	0.659778	-0.0488206		0.978795	0.999537	0.0413788		0.939547	0.944527	-0.218421
		-0.561607	-0.158985	0.00489434		-0.557582	0.317707	0.0691427		-0.433571	-0.0450204	0.831452		0.178141	0.660508	0.0685803		0.184265	0.893497	0.260303		0.320683	1	-0.090117		0.813537	0.99904	0.109724		0.816579	0.961761	0.184466		0.907538	1	-0.126369		0.973149	0.652866	-0.0496399		0.977884	0.999876	0.0449806		0.937064	0.944523	-0.214766
		-0.556485	-0.151904	0.0046585		-0.552244	0.32155	0.0697683		-0.426583	-0.0263364	0.821577		0.184247	0.665086	0.0662925		0.190676	0.89651	0.261112		0.327914	1	-0.0849302		0.81705	0.998424	0.109534		0.820214	0.958583	0.188045		0.910687	1	-0.133133		0.97215	0.645685	-0.0504055		0.97693	0.999965	0.0489205		0.934517	0.944519	-0.210432
		-0.55134	-0.144792	0.00445144		-0.54687	0.32546	0.0704028		-0.419557	-0.00765239	0.812541		0.190346	0.669579	0.0639805		0.197097	0.89952	0.261727		0.335136	1	-0.0797999		0.82053	0.997648	0.109349		0.823822	0.955334	0.191516		0.91378	1	-0.139042		0.970849	0.63823	-0.0511147		0.975934	0.999859	0.053309		0.931907	0.944568	-0.205557
		-0.546174	-0.13765	0.00427235		-0.541461	0.329464	0.071024		-0.412494	0.0110316	0.804349		0.196437	0.673985	0.0616387		0.203528	0.902518	0.262164		0.342349	1	-0.0748963		0.823978	0.996708	0.109165		0.827403	0.951948	0.194811		0.916818	1	-0.143959		0.969723	0.630496	-0.0517657		0.974896	0.999624	0.0582239		0.929232	0.944831	-0.200319
		-0.540986	-0.13048	0.00411824		-0.536015	0.333515	0.071615		-0.405394	0.0297156	0.796975		0.202521	0.678299	0.059263		0.209969	0.905507	0.262429		0.349552	1	-0.0703718		0.827394	0.995598	0.108978		0.830958	0.948472	0.19787		0.919801	1	-0.147804		0.968478	0.622477	-0.052358		0.973815	0.999052	0.0637005		0.926493	0.945094	-0.194916
		-0.535777	-0.123287	0.00398501		-0.530532	0.337661	0.0721669		-0.398257	0.0485369	0.790366		0.208596	0.682516	0.0568517		0.216422	0.908485	0.262527		0.356745	1	-0.0663437		0.830777	0.994318	0.108778		0.834487	0.944936	0.200645		0.922727	1	-0.150565		0.967087	0.614171	-0.0528924		0.972692	0.998341	0.0697283		0.923691	0.945357	-0.189545
		-0.530546	-0.116071	0.00386857		-0.525011	0.341881	0.0726797		-0.391084	0.0674496	0.784444		0.214664	0.686634	0.0544052		0.222887	0.91144	0.262469		0.363928	1	-0.0628883		0.834127	0.992862	0.108557		0.837989	0.941274	0.203102		0.925596	1	-0.152302		0.965801	0.605575	-0.053371		0.971525	0.997421	0.0762538		0.920824	0.94562	-0.184386
		-0.525295	-0.108835	0.00376553		-0.519451	0.346151	0.0731625		-0.383874	0.0863623	0.779115		0.220723	0.690647	0.0519257		0.229365	0.914383	0.262268		0.371099	1	-0.0600461		0.837444	0.991228	0.108303		0.841465	0.937573	0.205218		0.928408	1	-0.153137		0.964408	0.596686	-0.0537973		0.970314	0.996213	0.0831884		0.917892	0.945883	-0.179586
		-0.520023	-0.10158	0.0036735		-0.513852	0.350551	0.0736315		-0.376629	0.105275	0.774267		0.226773	0.694546	0.0494168		0.235856	0.917298	0.261939		0.378259	1	-0.0578305		0.840728	0.989413	0.108004		0.844915	0.933814	0.206981		0.931163	1	-0.15325		0.962943	0.587504	-0.0541751		0.96906	0.994859	0.0904194		0.914896	0.946146	-0.175242
		-0.51473	-0.0943086	0.0035907		-0.508213	0.355007	0.0741078		-0.369348	0.124188	0.769778		0.232814	0.698325	0.0468841		0.242361	0.920188	0.261494		0.385406	1	-0.056234		0.843978	0.987415	0.107649		0.848338	0.929998	0.208384		0.933859	1	-0.15285		0.961529	0.57803	-0.0545087		0.967762	0.993206	0.0978203		0.911835	0.9465	-0.17139
		-0.509417	-0.0870211	0.00351567		-0.502534	0.359544	0.0746171		-0.362031	0.1431	0.765516		0.238846	0.701974	0.0443341		0.248881	0.923062	0.260929		0.392541	1	-0.0552254		0.847196	0.985229	0.107231		0.851735	0.926157	0.209419		0.936496	1	-0.152167		0.960139	0.568264	-0.0548023		0.966419	0.99132	0.10526		0.90871	0.946876	-0.167989
		-0.504084	-0.0797197	0.00344731		-0.496813	0.364194	0.0751882		-0.35468	0.161956	0.761345		0.244868	0.705485	0.0417746		0.255417	0.925887	0.260224		0.399663	1	-0.054742		0.85038	0.982853	0.106744		0.855105	0.922274	0.210078		0.939075	1	-0.151429		0.958587	0.558209	-0.05506		0.965031	0.989278	0.112613		0.905519	0.947253	-0.164932
		-0.498731	-0.0724068	0.00338523		-0.491049	0.368901	0.0758505		-0.347295	0.180584	0.757122		0.250881	0.708848	0.0392139		0.261969	0.928688	0.259341		0.406772	1	-0.0546819		0.85353	0.98028	0.106186		0.85845	0.918368	0.210348		0.941593	1	-0.150844		0.957036	0.547869	-0.0552856		0.963598	0.986826	0.119768		0.902263	0.947629	-0.16205
		-0.493358	-0.0650855	0.00333024		-0.485241	0.373722	0.0766293		-0.339876	0.199212	0.752706		0.256884	0.712055	0.0366597		0.268538	0.931454	0.258224		0.413867	1	-0.0549051		0.856647	0.977508	0.105556		0.861768	0.914446	0.210214		0.944052	1	-0.150575		0.955513	0.537247	-0.0554823		0.962119	0.984204	0.126636		0.898943	0.948006	-0.159145
		-0.487966	-0.0577579	0.00328482		-0.479389	0.378629	0.0775429		-0.332422	0.21784	0.747959		0.262877	0.715097	0.0341187		0.275126	0.934161	0.256808		0.420948	1	-0.0552457		0.85973	0.974531	0.10486		0.865059	0.910488	0.209657		0.94645	1	-0.150729		0.953795	0.526348	-0.0556524		0.960594	0.981324	0.133155		0.895557	0.948383	-0.156001
		-0.482554	-0.0504263	0.00325353		-0.473492	0.383594	0.0785998		-0.324936	0.236468	0.742752		0.268859	0.717966	0.0315958		0.281733	0.936835	0.255023		0.428013	1	-0.0555297		0.862779	0.971344	0.104103		0.868325	0.906515	0.208653		0.948786	1	-0.151342		0.952171	0.51518	-0.055797		0.959022	0.978092	0.13929		0.892105	0.948722	-0.152414
		-0.477124	-0.0430938	0.00324319		-0.467547	0.388705	0.0797966		-0.317416	0.255097	0.736985		0.274831	0.720657	0.0290943		0.288359	0.939436	0.252811		0.435064	1	-0.0555956		0.865794	0.967944	0.103295		0.871563	0.902518	0.207176		0.951062	1	-0.152392		0.950564	0.503748	-0.0559164		0.957402	0.974682	0.145037		0.888589	0.949006	-0.148193
		-0.471675	-0.0357636	0.00326263		-0.461554	0.393874	0.0811166		-0.309864	0.273725	0.730597		0.280792	0.723161	0.0266161		0.295007	0.94197	0.250127		0.442098	1	-0.0553156		0.868775	0.964326	0.102448		0.874776	0.898484	0.205202		0.953275	1	-0.153814		0.948632	0.49206	-0.0560114		0.955735	0.970916	0.150419		0.885006	0.94929	-0.14318
		-0.466207	-0.0284388	0.00332179		-0.455513	0.399129	0.0825289		-0.30228	0.291745	0.723577		0.286742	0.725474	0.0241612		0.301676	0.94446	0.246955		0.449115	1	-0.0546113		0.871721	0.960487	0.101572		0.877962	0.894431	0.202711		0.955425	1	-0.155516		0.946865	0.48012	-0.0560825		0.954019	0.966879	0.155487		0.881358	0.949575	-0.137253
		-0.46072	-0.0211225	0.00343049		-0.449421	0.404498	0.0839884		-0.294663	0.309614	0.715958		0.29268	0.727588	0.0217275		0.308369	0.946824	0.24331		0.456116	1	-0.0534609		0.874633	0.956422	0.100682		0.881121	0.890336	0.199687		0.957513	1	-0.157395		0.945164	0.467936	-0.0561307		0.952254	0.962662	0.160311		0.877644	0.949859	-0.130347
		-0.455216	-0.0138166	0.00359712		-0.443278	0.409925	0.0854374		-0.287015	0.327483	0.707811		0.298607	0.729498	0.0193108		0.315085	0.949133	0.239239		0.463099	1	-0.0518978		0.877511	0.952127	0.0997904		0.884254	0.886209	0.196122		0.959537	1	-0.159343		0.943155	0.455512	-0.0561567		0.950439	0.957987	0.164975		0.873864	0.950143	-0.12247
		-0.449693	-0.00652199	0.00382727		-0.437081	0.415468	0.0868114		-0.279336	0.345352	0.699219		0.304523	0.731198	0.0169061		0.321827	0.951361	0.234816		0.470063	1	-0.050004		0.880353	0.947598	0.0989079		0.887359	0.882062	0.192017		0.961497	1	-0.161252		0.94136	0.442854	-0.0561605		0.948574	0.953123	0.169568		0.870018	0.950427	-0.113715
		-0.444153	0.000761163	0.00412239		-0.43083	0.421102	0.0880465		-0.271626	0.363221	0.690263		0.310426	0.73268	0.0145082		0.328594	0.953476	0.230137		0.477009	1	-0.0478962		0.883162	0.94283	0.0980434		0.890438	0.877865	0.187386		0.963392	1	-0.163022		0.939461	0.429968	-0.0561425		0.946657	0.947977	0.174172		0.866105	0.950586	-0.10425
		-0.438595	0.00803385	0.00447931		-0.424523	0.426796	0.0890875		-0.263885	0.38109	0.681005		0.316317	0.733939	0.0121128		0.335389	0.955536	0.225313		0.483935	1	-0.0457067		0.885935	0.937818	0.0972023		0.893489	0.873652	0.182263		0.965223	1	-0.164568		0.937334	0.416857	-0.0561027		0.944687	0.942445	0.178849		0.862127	0.950744	-0.0943103
		-0.43302	0.015297	0.00489075		-0.418158	0.432645	0.0898933		-0.256114	0.398532	0.671487		0.322195	0.734968	0.00971811		0.342212	0.957485	0.220463		0.490841	1	-0.0435631		0.888673	0.932557	0.0963866		0.896513	0.869414	0.176709		0.966989	1	-0.165845		0.935447	0.403528	-0.056042		0.942665	0.936719	0.183635		0.858081	0.950903	-0.0841624
		-0.427428	0.0225498	0.00534616		-0.411734	0.438558	0.0904389		-0.248313	0.415334	0.661723		0.328061	0.735761	0.00732471		0.349064	0.959354	0.215712		0.497726	1	-0.0415722		0.891376	0.927042	0.0955958		0.899509	0.865154	0.170815		0.968688	1	-0.166859		0.933415	0.389984	-0.0559616		0.940589	0.930604	0.188526		0.85397	0.951062	-0.0740844
		-0.421819	0.0297914	0.0058326		-0.40525	0.444567	0.0907132		-0.240483	0.432137	0.65171		0.333914	0.736314	0.00493613		0.355947	0.96117	0.211187		0.504591	1	-0.0398138		0.894044	0.921268	0.0948277		0.902477	0.860884	0.164698		0.970322	1	-0.167677		0.931256	0.376229	-0.055863		0.938458	0.924199	0.193481		0.849791	0.951221	-0.0643416
		-0.416193	0.0370196	0.00633565		-0.398703	0.450707	0.090717		-0.232624	0.448939	0.641431		0.339753	0.73662	0.00255797		0.362862	0.962859	0.207016		0.511434	1	-0.0383424		0.896677	0.915229	0.0940793		0.905417	0.856604	0.158501		0.971889	1	-0.168419		0.929179	0.362266	-0.0557478		0.936271	0.917599	0.198425		0.845546	0.951379	-0.0551697
		-0.410551	0.0442304	0.00684018		-0.392092	0.456913	0.0904606		-0.224736	0.465741	0.630863		0.34558	0.736673	0.00019745		0.36981	0.964499	0.203319		0.518254	1	-0.0371926		0.899274	0.908921	0.0933475		0.908329	0.852325	0.152382		0.973388	1	-0.169235		0.927069	0.3481	-0.0556175		0.934028	0.910518	0.203256		0.841234	0.951509	-0.0467562
		-0.404893	0.0514186	0.00733084		-0.385414	0.463254	0.0899637		-0.216819	0.482544	0.619981		0.351392	0.736466	-0.00213694		0.376792	0.966065	0.200201		0.525052	1	-0.0363813		0.901836	0.902338	0.0926297		0.911211	0.848045	0.146508		0.97482	1	-0.170289		0.924819	0.333732	-0.0554733		0.931726	0.903245	0.207861		0.836856	0.95162	-0.0392226
		-0.399218	0.0585787	0.00779245		-0.378669	0.469699	0.0892571		-0.208875	0.499346	0.608766		0.357191	0.735989	-0.00443571		0.383809	0.967535	0.197738		0.531826	1	-0.0359036		0.904362	0.895476	0.0919234		0.914063	0.843776	0.141047		0.976184	1	-0.171737		0.922517	0.319167	-0.0553158		0.929365	0.895686	0.212123		0.832412	0.951731	-0.0326107
		-0.393528	0.0657044	0.00821066		-0.371853	0.476215	0.0883842		-0.200902	0.515032	0.597212		0.362975	0.735234	-0.00668894		0.390863	0.968958	0.195971		0.538576	1	-0.0357236		0.906853	0.888329	0.0912269		0.916886	0.839514	0.136158		0.977479	1	-0.17371		0.920371	0.304407	-0.0551449		0.926943	0.887745	0.215935		0.827901	0.951842	-0.0268827
		-0.387822	0.0727892	0.00857303		-0.364964	0.482906	0.0874013		-0.192903	0.530718	0.58533		0.368746	0.734189	-0.00888713		0.397955	0.970291	0.194904		0.545302	1	-0.0357651		0.909307	0.88089	0.0905387		0.919678	0.835261	0.131989		0.978705	1	-0.176306		0.918047	0.289454	-0.05496		0.92446	0.879612	0.219206		0.823323	0.951952	-0.0219382
		-0.382101	0.0798265	0.00887011		-0.358002	0.489667	0.0863749		-0.184876	0.546404	0.57315		0.374501	0.732846	-0.011022		0.405086	0.971562	0.194503		0.552002	1	-0.0359087		0.911726	0.873157	0.0898579		0.922439	0.831022	0.128662		0.979862	1	-0.179571		0.915672	0.274312	-0.0547597		0.921913	0.871096	0.22187		0.818679	0.952063	-0.0176407
		-0.376365	0.08681	0.00909655		-0.350963	0.496531	0.0853776		-0.176823	0.56209	0.56072		0.380242	0.731195	-0.0130872		0.412257	0.97279	0.194695		0.558677	1	-0.0360003		0.914109	0.865125	0.0891847		0.925169	0.826789	0.126279		0.980949	1	-0.183485		0.913387	0.258982	-0.0545412		0.919302	0.862288	0.223893		0.813969	0.952161	-0.0138439
		-0.370614	0.0937328	0.00925174		-0.343845	0.503527	0.0844831		-0.168743	0.577776	0.548088		0.385968	0.729231	-0.0150788		0.41947	0.973922	0.195381		0.565325	1	-0.0358706		0.916456	0.856792	0.0885202		0.927866	0.822564	0.124911		0.981965	1	-0.187965		0.91088	0.243468	-0.0543004		0.916626	0.853286	0.225273		0.809193	0.952207	-0.010407
		-0.364849	0.100591	0.00933983		-0.336647	0.510585	0.0837606		-0.160637	0.593462	0.535305		0.391679	0.726945	-0.0169956		0.426725	0.97502	0.196445		0.571947	1	-0.0353568		0.918766	0.848155	0.0878665		0.930529	0.818338	0.124593		0.982911	1	-0.192867		0.908493	0.22777	-0.0540315		0.913882	0.843788	0.226042		0.80435	0.952253	-0.00719996
		-0.359069	0.10738	0.00936935		-0.329366	0.517765	0.0832693		-0.152506	0.608539	0.522426		0.397374	0.724329	-0.0188393		0.434024	0.976064	0.197764		0.578541	1	-0.034321		0.921041	0.839214	0.0872258		0.933158	0.814111	0.125326		0.983785	1	-0.198007		0.906112	0.211894	-0.0537286		0.911068	0.834085	0.226268		0.799441	0.952299	-0.00410042
		-0.353275	0.1141	0.00935244		-0.321998	0.525026	0.0830528		-0.14435	0.623209	0.509513		0.403053	0.721379	-0.0206142		0.441368	0.977042	0.19923		0.585108	1	-0.0326648		0.923278	0.829968	0.0866008		0.935752	0.809864	0.127071		0.984587	1	-0.203187		0.903497	0.195841	-0.0533858		0.908183	0.824078	0.22605		0.794466	0.952345	-0.000993221
		-0.347467	0.120748	0.00930363		-0.314542	0.532342	0.0831361		-0.13617	0.637878	0.496643		0.408717	0.718087	-0.0223265		0.448758	0.977988	0.200752		0.591646	1	-0.0303381		0.92548	0.820416	0.0859946		0.93831	0.8056	0.129754		0.985317	1	-0.20821		0.900982	0.179616	-0.0529989		0.905226	0.813652	0.22552		0.789425	0.952391	0.00222406
		-0.341645	0.127323	0.00923802		-0.306995	0.539777	0.0835233		-0.127965	0.652548	0.483913		0.414364	0.714448	-0.0239844		0.456196	0.978874	0.202267		0.598154	1	-0.0273422		0.927645	0.810558	0.0854108		0.94083	0.801313	0.133267		0.985974	1	-0.212903		0.898433	0.163222	-0.0525653		0.902194	0.803014	0.224838		0.784318	0.952437	0.00562897
		-0.33581	0.133822	0.00916979		-0.299354	0.547253	0.0842013		-0.119737	0.667218	0.471433		0.419995	0.71046	-0.0255968		0.463681	0.97972	0.203736		0.604633	1	-0.023732		0.929773	0.800395	0.0848537		0.943312	0.796978	0.137467		0.986559	1	-0.21711		0.895707	0.146663	-0.0520837		0.899085	0.79195	0.224187		0.779145	0.952276	0.00926001
		-0.329961	0.140242	0.00911084		-0.291617	0.554791	0.085147		-0.111487	0.681888	0.459314		0.42561	0.706115	-0.0271725		0.471216	0.980541	0.205141		0.611082	1	-0.019614		0.931865	0.789925	0.0843268		0.945755	0.792618	0.142192		0.987069	1	-0.220697		0.893068	0.129942	-0.0515552		0.895898	0.780562	0.223754		0.773906	0.952063	0.013106
		-0.3241	0.14658	0.00906983		-0.283781	0.562398	0.0863338		-0.103214	0.696371	0.447663		0.431208	0.701411	-0.0287184		0.478801	0.981309	0.206482		0.6175	1	-0.0151396		0.933919	0.779149	0.0838321		0.948157	0.7882	0.147264		0.987505	1	-0.223556		0.890423	0.11306	-0.0509827		0.892631	0.76896	0.22372		0.768602	0.95185	0.0171042
		-0.318225	0.152835	0.00905179		-0.275843	0.570037	0.0877358		-0.0949198	0.71011	0.436567		0.436788	0.696343	-0.0302386		0.486437	0.982061	0.207771		0.623887	1	-0.0104897		0.935937	0.768067	0.0833695		0.950515	0.783735	0.152502		0.987867	1	-0.225612		0.887633	0.0960204	-0.0503714		0.889281	0.756823	0.224239		0.763231	0.951637	0.0211491
		-0.312338	0.159006	0.00905837		-0.267801	0.577734	0.0893273		-0.0866043	0.723848	0.426084		0.442352	0.690905	-0.0317343		0.494126	0.982791	0.209042		0.630241	1	-0.00585146		0.937918	0.756676	0.082936		0.952829	0.779239	0.15773		0.988154	1	-0.226841		0.884894	0.0788235	-0.0497283		0.885845	0.744479	0.225428		0.757794	0.951424	0.0251059
		-0.306439	0.16509	0.00908844		-0.259651	0.585465	0.0910801		-0.0782683	0.737587	0.41623		0.447898	0.685092	-0.0332031		0.501868	0.983502	0.210349		0.636563	0.999949	-0.00139739		0.939862	0.744977	0.0825269		0.955097	0.774656	0.162786		0.988365	1	-0.227284		0.882104	0.06147	-0.0490621		0.882321	0.731822	0.227356		0.752292	0.951211	0.0288265
		-0.300528	0.171083	0.00913877		-0.25139	0.59322	0.0929613		-0.0699123	0.751325	0.406969		0.453426	0.678901	-0.0346404		0.509663	0.984209	0.211767		0.642852	0.999696	0.00272937		0.941769	0.732968	0.0821353		0.957317	0.770037	0.16753		0.9885	1	-0.227048		0.87933	0.0439606	-0.0483829		0.878707	0.718762	0.230045		0.746724	0.950779	0.0321668
		-0.294605	0.176979	0.00920505		-0.243016	0.60102	0.0949327		-0.0615369	0.765064	0.398219		0.458936	0.672324	-0.0360395		0.517513	0.984909	0.213385		0.649107	0.999444	0.00641822		0.943639	0.720646	0.0817529		0.959487	0.765363	0.171844		0.988559	1	-0.226297		0.876496	0.0262966	-0.0477016		0.875	0.705504	0.233473		0.741091	0.950019	0.035004
		-0.28867	0.182772	0.00928251		-0.234525	0.608836	0.09695		-0.0531427	0.778802	0.389855		0.464429	0.665357	-0.0373931		0.525417	0.985613	0.215289		0.655328	0.999191	0.0095856		0.945471	0.70801	0.0813697		0.961605	0.76061	0.175638		0.988541	1	-0.225233		0.873433	0.00847856	-0.047029		0.871198	0.691858	0.23758		0.735392	0.949258	0.0372577
		-0.282724	0.188458	0.00936605		-0.225914	0.616674	0.0989646		-0.0447301	0.791816	0.381727		0.469903	0.657996	-0.038693		0.533377	0.98632	0.217553		0.661513	0.998938	0.0121689		0.947266	0.695058	0.0809751		0.96367	0.755815	0.178848		0.988445	1	-0.224063		0.870577	-0.0094928	-0.0463745		0.867297	0.677929	0.242278		0.729627	0.948498	0.0389102
		-0.276766	0.19403	0.00945004		-0.21718	0.624537	0.100924		-0.0362999	0.804649	0.373678		0.475358	0.650235	-0.0399313		0.541392	0.987037	0.220216		0.667662	0.998685	0.014127		0.949024	0.681788	0.0805576		0.965678	0.750934	0.181443		0.988273	1	-0.222978		0.867706	-0.027617	-0.0457459		0.863296	0.663812	0.247456		0.723797	0.947738	0.0400193
		-0.270798	0.199484	0.00952842		-0.208321	0.632412	0.102776		-0.0278525	0.817481	0.365552		0.480795	0.642072	-0.0411002		0.549463	0.98776	0.223279		0.673775	0.998432	0.0154491		0.950744	0.668199	0.080106		0.967626	0.745978	0.183423		0.988022	1	-0.222131		0.864614	-0.0458922	-0.0451481		0.85919	0.649231	0.252997		0.717901	0.946977	0.0407141
		-0.264819	0.204815	0.00959539		-0.199332	0.640307	0.104463		-0.0193884	0.830313	0.357199		0.486212	0.633504	-0.0421934		0.55759	0.98849	0.2267		0.679851	0.995432	0.0161668		0.952427	0.654291	0.0796096		0.969511	0.740973	0.184817		0.987693	1	-0.221621		0.861523	-0.0643156	-0.0445832		0.854977	0.634467	0.258779		0.71194	0.946217	0.0411751
		-0.258829	0.210019	0.00964639		-0.190211	0.648209	0.10593		-0.0109083	0.843146	0.348466		0.491611	0.62453	-0.0432066		0.565773	0.98923	0.2304		0.685888	0.991746	0.016359		0.954072	0.640065	0.079059		0.971332	0.735823	0.185681		0.987285	1	-0.221493		0.858435	-0.0828847	-0.0440512		0.850652	0.619426	0.264682		0.705914	0.944731	0.0416073
		-0.25283	0.21509	0.009679		-0.180953	0.656117	0.10712		-0.00241274	0.855978	0.339206		0.49699	0.615149	-0.0441383		0.574013	0.989974	0.234273		0.691888	0.98806	0.0161412		0.955679	0.625519	0.0784465		0.973084	0.730604	0.186089		0.986798	1	-0.221737		0.855344	-0.101596	-0.0435498		0.846213	0.604018	0.270591		0.699822	0.943245	0.0422152
		-0.24682	0.220023	0.00969336		-0.171557	0.664026	0.107978		0.00609777	0.868418	0.329278		0.502349	0.605362	-0.0449897		0.582308	0.990725	0.238196		0.697848	0.984374	0.0156412		0.957249	0.610655	0.0777657		0.974765	0.725282	0.18613		0.986232	1	-0.222295		0.852223	-0.120445	-0.0430752		0.841656	0.588427	0.276398		0.693665	0.941759	0.0431852
		-0.240801	0.224811	0.0096922		-0.162018	0.671929	0.10845		0.0146226	0.880267	0.318566		0.507689	0.595169	-0.0457645		0.590658	0.991478	0.242053		0.703767	0.980688	0.0149753		0.958781	0.595473	0.0770117		0.976372	0.719799	0.1859		0.985587	1	-0.223067		0.84909	-0.139428	-0.0426221		0.836978	0.572473	0.282009		0.687443	0.940274	0.0446787
		-0.234772	0.229449	0.00968055		-0.152334	0.679825	0.108477		0.0231613	0.892117	0.306995		0.513008	0.584568	-0.0464689		0.599062	0.992232	0.245746		0.709647	0.977002	0.0142339		0.960275	0.579974	0.0761815		0.977901	0.714229	0.185497		0.984861	1	-0.223928		0.845835	-0.158539	-0.0421841		0.832175	0.556251	0.287351		0.681155	0.938788	0.0468293
		-0.228734	0.23393	0.00966515		-0.142501	0.687701	0.108		0.0317133	0.903966	0.294554		0.518308	0.573559	-0.0471111		0.607519	0.992978	0.249206		0.715485	0.973391	0.0134765		0.961731	0.564159	0.0752743		0.979348	0.708473	0.185016		0.984055	1	-0.224739		0.842657	-0.177772	-0.0417547		0.827244	0.539851	0.292374		0.674803	0.937302	0.0497406
		-0.222686	0.238247	0.0096538		-0.132516	0.695566	0.106957		0.0402779	0.915816	0.281292		0.523586	0.562139	-0.0477006		0.616028	0.993717	0.252405		0.721281	0.969895	0.0127336		0.963149	0.548031	0.0742921		0.980708	0.70256	0.184544		0.983169	1	-0.225361		0.839405	-0.19712	-0.0413277		0.822179	0.523013	0.297062		0.668386	0.935379	0.053479
		-0.21663	0.242392	0.00965421		-0.122375	0.703403	0.105295		0.0488547	0.927665	0.267328		0.528845	0.550309	-0.0482478		0.624588	0.994443	0.255348		0.727035	0.966399	0.0120098		0.96453	0.531595	0.0732395		0.981976	0.696543	0.184156		0.982201	1	-0.225661		0.835933	-0.216577	-0.0408976		0.816978	0.506002	0.301429		0.661905	0.933164	0.0580621
		-0.210566	0.246358	0.00967273		-0.112077	0.711211	0.102971		0.057443	0.939515	0.252828		0.534082	0.538065	-0.0487626		0.6332	0.995139	0.258066		0.732745	0.962902	0.0112879		0.965872	0.514851	0.0721228		0.98315	0.69024	0.183908		0.981152	1	-0.225514		0.832726	-0.236134	-0.0404595		0.811634	0.488732	0.305523		0.65536	0.930949	0.0634446
		-0.204493	0.250139	0.00971335		-0.101617	0.718999	0.0999594		0.0660424	0.948965	0.238		0.539298	0.525406	-0.0492536		0.641859	0.995815	0.260615		0.738412	0.959406	0.0105327		0.967176	0.497803	0.0709488		0.984223	0.683817	0.183835		0.980021	1	-0.224806		0.829435	-0.255785	-0.0400096		0.806144	0.471121	0.309415		0.648752	0.928734	0.0695095
		-0.198412	0.253729	0.0097771		-0.0909919	0.726721	0.0962577		0.0746522	0.958416	0.223078		0.544493	0.51233	-0.0497277		0.650565	0.996447	0.263078		0.744033	0.955909	0.00969782		0.968441	0.480454	0.0697236		0.985191	0.677215	0.183953		0.978809	1	-0.223432		0.825922	-0.275521	-0.0395453		0.800504	0.453341	0.313197		0.64208	0.926519	0.0760711
		-0.192323	0.257121	0.00986191		-0.0801995	0.734408	0.0918901		0.0832718	0.967867	0.208313		0.549666	0.498839	-0.0501891		0.659313	0.997034	0.265564		0.74961	0.952413	0.00873697		0.969669	0.462809	0.0684522		0.986051	0.670367	0.184255		0.977514	1	-0.221316		0.822514	-0.295333	-0.0390646		0.794709	0.435227	0.316966		0.635345	0.924304	0.0828896
		-0.186227	0.26031	0.00996279		-0.0692362	0.742044	0.0869051		0.0919009	0.977318	0.193953		0.554818	0.484932	-0.0506396		0.668102	0.997593	0.268213		0.75514	0.949395	0.0076156		0.970858	0.44487	0.0671385		0.986795	0.663398	0.184719		0.976136	1	-0.218421		0.819068	-0.31521	-0.0385666		0.788755	0.416875	0.320817		0.628547	0.921937	0.0896958
		-0.180123	0.26329	0.0100723		-0.0580991	0.749595	0.0813719		0.100539	0.986769	0.180216		0.559948	0.470611	-0.0510793		0.676928	0.99807	0.271185		0.760624	0.946378	0.00631928		0.972009	0.426642	0.0657854		0.987419	0.656186	0.185303		0.974675	1	-0.214766		0.81551	-0.335144	-0.0380513		0.782637	0.398363	0.324834		0.621687	0.91896	0.0962202
		-0.174012	0.266058	0.0101813		-0.0467855	0.757099	0.0753761		0.109185	0.99622	0.167257		0.565056	0.455875	-0.0515067		0.68579	0.998514	0.274649		0.766061	0.94336	0.00485541		0.973122	0.408129	0.0643957		0.987914	0.648796	0.18596		0.973131	1	-0.210432		0.811988	-0.355123	-0.0375196		0.776349	0.379479	0.329085		0.614765	0.915984	0.102225
		-0.167895	0.268607	0.0102801		-0.0352931	0.764503	0.0690141		0.117838	1	0.155155		0.570141	0.440727	-0.05192		0.694683	0.998908	0.278767		0.77145	0.940343	0.00324836		0.974196	0.389335	0.0629723		0.988276	0.641288	0.186635		0.971503	1	-0.205557		0.808486	-0.375137	-0.0369726		0.769885	0.360462	0.333623		0.607781	0.913007	0.107531
		-0.16177	0.270932	0.0103592		-0.0236196	0.771821	0.062389		0.126499	1	0.14391		0.575204	0.425167	-0.0523168		0.703605	0.999233	0.283678		0.77679	0.937325	0.00153236		0.975232	0.370265	0.0615185		0.988497	0.633487	0.187275		0.969791	1	-0.200319		0.804741	-0.395174	-0.0364114		0.763242	0.341243	0.338485		0.600736	0.910031	0.112044
		-0.15564	0.273027	0.0104096		-0.0117628	0.779081	0.0556061		0.135165	1	0.133465		0.580244	0.409197	-0.0526949		0.712552	0.999522	0.289482		0.78208	0.934307	-0.000252728		0.976229	0.350923	0.0600371		0.988571	0.625568	0.187835		0.967995	1	-0.194916		0.801112	-0.41522	-0.0358365		0.756413	0.321789	0.343697		0.59363	0.907054	0.115772
		-0.149503	0.274887	0.0104232		0.000279816	0.786185	0.0487722		0.143837	1	0.123726		0.585261	0.39282	-0.0530519		0.721518	0.999736	0.296236		0.787321	0.931676	-0.00206073		0.977187	0.331311	0.0585306		0.988491	0.617475	0.188283		0.966113	1	-0.189545		0.797546	-0.435264	-0.0352478		0.749392	0.302225	0.349274		0.586462	0.904077	0.118829
		-0.14336	0.276505	0.0103932		0.0125104	0.793224	0.0419936		0.152513	1	0.114587		0.590255	0.376041	-0.0533853		0.730497	0.999889	0.303943		0.792511	0.929303	-0.00383318		0.978107	0.311436	0.0570008		0.988252	0.609146	0.188606		0.964147	1	-0.184386		0.793787	-0.455292	-0.0346432		0.742175	0.282462	0.355223		0.579234	0.900347	0.121433
		-0.137213	0.277876	0.0103142		0.0249312	0.800164	0.0353743		0.161193	1	0.105932		0.595225	0.358866	-0.0536933		0.739484	1	0.312551		0.79765	0.92693	-0.00549084		0.978989	0.291302	0.0554497		0.987845	0.600699	0.188808		0.962095	1	-0.179586		0.790121	-0.475291	-0.0340186		0.734756	0.262574	0.361542		0.571946	0.896428	0.123884
		-0.131056	0.278991	0.0101836		0.0375446	0.806968	0.0290105		0.169876	1	0.0976477		0.600175	0.341299	-0.0539741		0.748474	0.999992	0.321956		0.802737	0.924557	-0.00693079		0.979832	0.270916	0.0538796		0.987261	0.592016	0.188909		0.959958	1	-0.175242		0.786384	-0.495248	-0.0333669		0.72713	0.242604	0.368221		0.564598	0.892509	0.126531
		-0.124885	0.279845	0.0100018		0.0503515	0.813704	0.0229855		0.178561	1	0.0896232		0.605109	0.323348	-0.0542265		0.757459	0.999928	0.332006		0.807771	0.922183	-0.0080357		0.980638	0.250288	0.0522928		0.986492	0.583158	0.188945		0.957734	1	-0.17139		0.782575	-0.51515	-0.0326784		0.719289	0.22247	0.375241		0.557191	0.888589	0.129748
		-0.118698	0.280431	0.009773		0.0633525	0.820301	0.0173647		0.187247	1	0.0817568		0.610027	0.305017	-0.0544487		0.766436	0.99978	0.342518		0.812751	0.91981	-0.00869368		0.981406	0.229427	0.0506914		0.98553	0.574182	0.188962		0.955424	1	-0.167989		0.778776	-0.534981	-0.0319414		0.711228	0.202286	0.382572		0.549724	0.88467	0.133905
		-0.112485	0.280742	0.00950456		0.0765481	0.826792	0.0121927		0.195934	1	0.0739689		0.614937	0.286314	-0.0546382		0.775399	0.999501	0.353287		0.817678	0.917571	-0.00882041		0.982137	0.208344	0.0490782		0.984364	0.564922	0.189013		0.953026	1	-0.164932		0.774866	-0.554727	-0.0311423		0.702941	0.182027	0.390179		0.542198	0.880751	0.139342
		-0.106229	0.28077	0.00920666		0.0899387	0.833214	0.00749117		0.20462	1	0.0662179		0.619853	0.267243	-0.0547916		0.784338	0.999153	0.364095		0.82255	0.91587	-0.00837458		0.982834	0.187051	0.047456		0.982988	0.555553	0.189156		0.950542	1	-0.16205		0.770812	-0.57437	-0.0302662		0.694421	0.1617	0.398021		0.534613	0.876375	0.146356
		-0.0999009	0.280505	0.00889158		0.103525	0.839462	0.00325886		0.213305	1	0.0585124		0.624797	0.247811	-0.0549045		0.793246	0.998656	0.374728		0.827367	0.914169	-0.00736235		0.983498	0.165561	0.045829		0.981392	0.546022	0.18945		0.94797	1	-0.159145		0.766914	-0.593895	-0.0292971		0.685663	0.141345	0.406054		0.52697	0.871313	0.155172
		-0.0934519	0.279936	0.00857291		0.117307	0.845641	-0.000525503		0.221989	1	0.0509172		0.629806	0.228024	-0.0549715		0.802112	0.998032	0.384982		0.832127	0.912468	-0.00583401		0.984132	0.143888	0.0442019		0.979567	0.536285	0.189953		0.945311	1	-0.156001		0.762858	-0.613285	-0.0282179		0.676659	0.12095	0.414232		0.519269	0.86625	0.165926
		-0.0868034	0.279052	0.00826466		0.131285	0.851716	-0.00389717		0.23067	1	0.0435513		0.634939	0.207886	-0.0549861		0.810928	0.997324	0.394684		0.836831	0.910767	-0.0038782		0.984742	0.122046	0.0425804		0.977504	0.526449	0.190718		0.942563	1	-0.152414		0.758398	-0.632519	-0.0270107		0.667405	0.100546	0.422511		0.511511	0.861188	0.178644
		-0.0798315	0.277844	0.00798003		0.145461	0.857653	-0.00689762		0.239347	1	0.0365766		0.640287	0.187404	-0.0549409		0.819684	0.996381	0.4037		0.841477	0.909065	-0.00161468		0.985334	0.10005	0.0409703		0.975192	0.516418	0.191784		0.939728	1	-0.148193		0.754044	-0.651577	-0.0256576		0.657893	0.0801343	0.430848		0.503694	0.856126	0.193229
		-0.0723481	0.276301	0.00773054		0.159831	0.863519	-0.0095664		0.24802	1	0.0301789		0.64599	0.166584	-0.0548281		0.828371	0.995335	0.411943		0.846065	0.907364	0.00081526		0.985916	0.0779151	0.0393767		0.972619	0.506251	0.193176		0.936804	1	-0.14318		0.749235	-0.670437	-0.0241415		0.648117	0.0597398	0.4392		0.495821	0.851063	0.209464
		-0.0640749	0.274414	0.00752554		0.174394	0.869244	-0.0119334		0.256688	1	0.0245414		0.652249	0.145435	-0.0546397		0.836979	0.994137	0.419381		0.850593	0.906116	0.00326243		0.986494	0.0556598	0.0378034		0.969776	0.495993	0.194903		0.933792	1	-0.137253		0.743757	-0.689076	-0.0224461		0.638071	0.0393654	0.447522		0.487891	0.846001	0.227012
		-0.0546125	0.272174	0.00737228		0.189147	0.874865	-0.0140137		0.26535	1	0.0198191		0.65935	0.123965	-0.0543687		0.8455	0.992728	0.426041		0.855062	0.904981	0.00558646		0.987074	0.0333017	0.0362524		0.966651	0.485525	0.196958		0.930692	1	-0.130347		0.737649	-0.707467	-0.020556		0.627749	0.0190209	0.455761		0.479904	0.839664	0.245443
		-0.0434066	0.269572	0.00727614		0.204087	0.880416	-0.0158075		0.274006	1	0.0161192		0.667679	0.102186	-0.05401		0.853922	0.991214	0.432		0.859471	0.903847	0.00766916		0.987648	0.0108586	0.0347241		0.963234	0.474981	0.199318		0.927504	1	-0.12247		0.730198	-0.725582	-0.0184576		0.617143	-0.00125563	0.46386		0.471861	0.833326	0.264263
		-0.029711	0.2666	0.00724092		0.219211	0.885796	-0.0173016		0.282654	1	0.0134879		0.677742	0.080109	-0.0535612		0.86223	0.989489	0.43737		0.863818	0.902712	0.00942057		0.988183	-0.0116514	0.0332177		0.959515	0.464324	0.201948		0.924227	1	-0.113715		0.720944	-0.74339	-0.0161391		0.606248	-0.0214911	0.471751		0.463762	0.826989	0.282962
		-0.0125564	0.263251	0.00726915		0.234518	0.891109	-0.0184721		0.291294	1	0.0119049		0.690162	0.0577471	-0.0530236		0.870412	0.987606	0.442286		0.868104	0.901577	0.0107779		0.988593	-0.034209	0.0317331		0.955481	0.453529	0.2048		0.920862	1	-0.10425		0.709221	-0.760857	-0.0135917		0.595057	-0.0416301	0.479367		0.455607	0.820651	0.30105
		0.00927069	0.25952	0.00736253		0.250003	0.896322	-0.0192848		0.299925	1	0.0112855		0.705669	0.0351135	-0.0524022		0.878454	0.985618	0.446885		0.872327	0.900442	0.0117002		0.988696	-0.0567937	0.030271		0.951123	0.442669	0.207823		0.917408	1	-0.0943103		0.694127	-0.777949	-0.0108099		0.583563	-0.061676	0.486637		0.447398	0.814314	0.318097
		0.0372264	0.255402	0.00752234		0.265665	0.901408	-0.0196965		0.308546	1	0.0114881		0.725038	0.0122211	-0.0517057		0.886342	0.983364	0.451296		0.876487	0.899439	0.0121633		0.988133	-0.0793832	0.0288337		0.946427	0.431686	0.210969		0.913866	1	-0.0841624		0.67416	-0.79463	-0.00779178		0.571761	-0.0816598	0.493488		0.439133	0.807976	0.333758
		0.0729709	0.250892	0.00774977		0.281497	0.90643	-0.0196573		0.317157	1	0.0123278		0.748995	-0.010917	-0.0509454		0.894064	0.981004	0.455626		0.880582	0.898634	0.0121579		0.986268	-0.101955	0.0274248		0.941383	0.420621	0.214192		0.910235	1	-0.0740844		0.647875	-0.810864	-0.00453921		0.559645	-0.101457	0.499852		0.430815	0.800779	0.347788
		0.118274	0.245986	0.00804617		0.297493	0.911329	-0.0191148		0.325756	1	0.0135957		0.778036	-0.034286	-0.0501344		0.901606	0.978484	0.459954		0.884614	0.897828	0.0116905		0.982035	-0.124486	0.0260488		0.935978	0.409501	0.217455		0.906515	1	-0.0643416		0.613427	-0.826614	-0.00105715		0.54721	-0.121169	0.505666		0.422443	0.793009	0.360059
		0.174842	0.240678	0.00841325		0.313645	0.916136	-0.0180208		0.334343	1	0.0150745		0.81219	-0.0578712	-0.0492873		0.908955	0.97575	0.464322		0.888579	0.897023	0.0107893		0.973769	-0.146953	0.0247122		0.9302	0.398262	0.220734		0.902706	1	-0.0551697		0.568028	-0.841839	0.00264687		0.53445	-0.140753	0.510876		0.414019	0.785239	0.370566
		0.244038	0.234966	0.00885351		0.329946	0.920881	-0.0163366		0.342917	1	0.01655		0.850693	-0.0816569	-0.0484195		0.916094	0.972909	0.468734		0.892479	0.896218	0.00950966		0.959023	-0.169331	0.0234237		0.924037	0.38698	0.224013		0.898808	1	-0.0467562		0.5094	-0.856499	0.00656312		0.521359	-0.160147	0.515443		0.405543	0.777469	0.379417
		0.32649	0.228844	0.00937068		0.346388	0.925469	-0.0140396		0.351478	1	0.0178186		0.89163	-0.105626	-0.0475464		0.923006	0.969853	0.473157		0.896312	0.895412	0.00793616		0.934465	-0.191596	0.022194		0.917477	0.375634	0.227284		0.894821	1	-0.0392226		0.434634	-0.870555	0.0106799		0.507932	-0.179441	0.519344		0.397015	0.769699	0.386819
		0.421585	0.222308	0.00996986		0.362964	0.929992	-0.0111275		0.360024	1	0.0186947		0.931612	-0.129758	-0.0466827		0.929674	0.966628	0.477518		0.900077	0.894607	0.00617322		0.895914	-0.213722	0.0210353		0.910509	0.364206	0.230548		0.890745	1	-0.0326107		0.341039	-0.883967	0.0149836		0.494163	-0.198529	0.522579		0.388437	0.761929	0.393049
		0.526929	0.215354	0.0106575		0.379668	0.934419	-0.00762149		0.368554	1	0.0190196		0.965605	-0.154034	-0.0458418		0.936081	0.963292	0.481713		0.903774	0.893861	0.00432778		0.838644	-0.235681	0.0199614		0.903121	0.352739	0.233805		0.88658	1	-0.0268827		0.22717	-0.896696	0.0194592		0.480046	-0.217451	0.525168		0.379808	0.753834	0.398423
		0.637899	0.207975	0.011441		0.396491	0.938712	-0.00356704		0.377069	1	0.0186766		0.987076	-0.178431	-0.0450346		0.94221	0.959663	0.485615		0.907402	0.893115	0.00249084		0.758038	-0.257447	0.0189871		0.895302	0.341193	0.237061		0.882326	1	-0.0219382		0.0925649	-0.908706	0.0240903		0.465579	-0.236262	0.527159		0.371131	0.744438	0.403271
		0.747517	0.200168	0.0123295		0.413422	0.942937	0.000967655		0.385566	1	0.0176093		0.98861	-0.202924	-0.0442691		0.948044	0.955912	0.489073		0.91096	0.892369	0.000725315		0.650589	-0.278992	0.0181278		0.88704	0.329586	0.240323		0.877982	1	-0.0176407		-0.0602137	-0.919963	0.0288605		0.450756	-0.254781	0.528627		0.362405	0.735043	0.407904
		0.846854	0.191931	0.0133327		0.430448	0.947024	0.00589306		0.394046	1	0.0158393		0.963042	-0.227489	-0.0435494		0.953565	0.951978	0.491931		0.914448	0.891624	-0.000936667		0.515093	-0.300286	0.0173992		0.878324	0.317939	0.243601		0.873548	1	-0.0138439		-0.2258	-0.930434	0.0337537		0.435576	-0.273176	0.529675		0.35363	0.725648	0.412589
		0.926127	0.183265	0.014461		0.447557	0.951001	0.0111021		0.402507	1	0.0134755		0.904974	-0.252099	-0.0428741		0.958756	0.947787	0.494034		0.917865	0.890878	-0.00249098		0.3537	-0.3213	0.0168177		0.869143	0.306188	0.246905		0.869026	1	-0.010407		-0.396216	-0.940088	0.0387548		0.420036	-0.291386	0.530427		0.344808	0.716253	0.417525
		0.976376	0.174174	0.0157243		0.464734	0.954905	0.0164767		0.410948	1	0.0107117		0.812296	-0.276725	-0.0422366		0.963599	0.943465	0.495243		0.92121	0.890132	-0.00395752		0.172385	-0.342004	0.0164001		0.859486	0.294394	0.250247		0.864413	1	-0.00719996		-0.560543	-0.9489	0.0438504		0.404131	-0.309335	0.531024		0.33594	0.706857	0.422833
		0.991321	0.164662	0.0171313		0.481968	0.958613	0.0218967		0.419369	1	0.00780854		0.687182	-0.301333	-0.0416243		0.968074	0.938872	0.495445		0.924482	0.889298	-0.00537404		-0.0194979	-0.362368	0.0161633		0.84934	0.282536	0.253634		0.859711	1	-0.00410042		-0.707807	-0.956843	0.0490288		0.387859	-0.327152	0.531618		0.327026	0.697462	0.428546
		0.968842	0.15474	0.0186887		0.499244	0.962235	0.0272479		0.427768	1	0.00506165		0.536126	-0.325888	-0.041019		0.972162	0.934067	0.494564		0.927681	0.888406	-0.00678541		-0.210645	-0.382359	0.0161233		0.838696	0.270593	0.257075		0.854919	1	-0.000993221		-0.828794	-0.963896	0.0542804		0.371217	-0.344697	0.532364		0.318066	0.68671	0.434625
		0.911503	0.144416	0.0204014		0.516551	0.96573	0.0324297		0.436144	1	0.0027641		0.368869	-0.350353	-0.0403982		0.975843	0.929119	0.492568		0.930806	0.887514	-0.00822851		-0.389843	-0.401947	0.016295		0.827543	0.258608	0.260572		0.850038	1	0.00222406		-0.916763	-0.970039	0.0595977		0.354202	-0.362033	0.533411		0.309061	0.675618	0.440969
		0.825944	0.133706	0.0222721		0.533873	0.969042	0.0373608		0.444497	1	0.00117163		0.196539	-0.37469	-0.0397359		0.979099	0.9238	0.489475		0.933857	0.886621	-0.00971779		-0.547995	-0.421101	0.0166919		0.815875	0.24654	0.264125		0.845066	1	0.00562897		-0.969716	-0.975255	0.0649749		0.336814	-0.379229	0.534898		0.300012	0.664527	0.447436
		0.721356	0.122625	0.0243017		0.551194	0.972261	0.041982		0.452825	1	0.000479142		0.0296106	-0.398856	-0.039005		0.981909	0.918328	0.485352		0.936832	0.885729	-0.0112398		-0.679479	-0.43979	0.0173264		0.803682	0.234413	0.267732		0.840004	1	0.00926001		-0.990294	-0.97953	0.0704072		0.319054	-0.396064	0.53695		0.29092	0.653435	0.453865
		0.607598	0.111194	0.0264898		0.568496	0.975289	0.046258		0.461127	1	0.000806314		-0.123699	-0.422809	-0.0381786		0.984255	0.912623	0.48031		0.939731	0.884837	-0.0127611		-0.782534	-0.457985	0.01821		0.790958	0.222246	0.271391		0.834852	1	0.013106		-0.983855	-0.982853	0.0758904		0.300924	-0.41275	0.539669		0.281785	0.642343	0.460097
		0.493543	0.0994349	0.0288341		0.585757	0.978167	0.0501792		0.469403	1	0.00219179		-0.258216	-0.446504	-0.037231		0.986116	0.906597	0.47449		0.942554	0.883891	-0.0142459		-0.858714	-0.475659	0.0193537		0.777695	0.209983	0.275108		0.829611	1	0.0171042		-0.957757	-0.985216	0.08142		0.282425	-0.429213	0.543137		0.272608	0.631252	0.466001
		0.386029	0.0873727	0.0313294		0.60296	0.980945	0.0537627		0.477651	1	0.00459462		-0.371776	-0.469898	-0.0361391		0.987476	0.900406	0.468058		0.945299	0.88273	-0.0156753		-0.911798	-0.492787	0.0207679		0.763883	0.197682	0.278901		0.824278	1	0.0211491		-0.919776	-0.986613	0.0869917		0.263559	-0.44537	0.547415		0.26339	0.619524	0.471491
		0.289491	0.0750353	0.0339678		0.620084	0.983463	0.057051		0.48587	1	0.00790003		-0.464633	-0.492947	-0.0348818		0.988314	0.893879	0.461188		0.947965	0.88157	-0.0170577		-0.94658	-0.509348	0.022462		0.749516	0.185327	0.282805		0.818856	1	0.0251059		-0.876289	-0.987042	0.0926002		0.244327	-0.461371	0.552541		0.25413	0.606843	0.476541
		0.206138	0.0624534	0.0367381		0.637111	0.985871	0.0601095		0.49406	1	0.0119322		-0.538631	-0.515611	-0.0334399		0.988613	0.887089	0.454063		0.950554	0.880409	-0.0184221		-0.967877	-0.52532	0.0244436		0.734587	0.1729	0.286873		0.813343	1	0.0288265		-0.832267	-0.986503	0.0982392		0.224731	-0.477059	0.558528		0.244831	0.594162	0.481197
		0.136415	0.0496601	0.0396268		0.654021	0.988115	0.0630209		0.502219	1	0.0164739		-0.596427	-0.537855	-0.0317957		0.988354	0.880124	0.446859		0.953062	0.879249	-0.019798		-0.97989	-0.540687	0.0267179		0.71909	0.160438	0.291169		0.80774	1	0.0321668		-0.7912	-0.984999	0.103902		0.204773	-0.492508	0.565365		0.235492	0.581481	0.48557
		0.0795664	0.03669	0.0426186		0.670794	0.990125	0.0658786		0.510346	1	0.0212857		-0.640893	-0.559643	-0.029933		0.987519	0.872704	0.43975		0.955491	0.878088	-0.0211941		-0.985926	-0.555433	0.0292882		0.703026	0.147906	0.295772		0.802047	1	0.035004		-0.754929	-0.982537	0.109579		0.184458	-0.507796	0.573008		0.226114	0.5688	0.489836
		0.0341317	0.02358	0.0456974		0.687408	0.992015	0.06878		0.518441	1	0.0261214		-0.674751	-0.580945	-0.0278378		0.98609	0.865093	0.432893		0.95784	0.876927	-0.0225857		-0.988373	-0.569545	0.0321551		0.686394	0.135322	0.300759		0.796265	1	0.0372577		-0.724346	-0.979125	0.115264		0.163795	-0.522681	0.58139		0.216698	0.556119	0.494212
		-0.00165848	0.0103674	0.0488473		0.703838	0.99366	0.0718195		0.526502	1	0.0307384		-0.700383	-0.601733	-0.0254979		0.984047	0.857197	0.426431		0.960107	0.875554	-0.0239206		-0.988832	-0.583013	0.0353169		0.669191	0.122702	0.306209		0.790394	1	0.0389102		-0.699155	-0.974775	0.120946		0.142793	-0.537402	0.59042		0.207245	0.543438	0.498945
		-0.0296147	-0.00291239	0.0520533		0.72006	0.995117	0.0750806		0.534529	1	0.0349035		-0.719771	-0.621985	-0.0229032		0.981374	0.848903	0.420491		0.962292	0.874128	-0.0251414		-0.988295	-0.595829	0.038769		0.651418	0.109987	0.31219		0.784435	1	0.0400193		-0.678614	-0.969502	0.126616		0.121459	-0.551879	0.59999		0.197754	0.529368	0.504286
		-0.0514209	-0.0162268	0.0553015		0.736049	0.996447	0.0786276		0.54252	1	0.0384026		-0.734511	-0.641677	-0.0200446		0.978055	0.840406	0.415181		0.964395	0.872702	-0.0262122		-0.987334	-0.607986	0.0425045		0.633072	0.0972313	0.318761		0.778387	1	0.0407141		-0.662371	-0.963323	0.132265		0.099803	-0.566029	0.609983		0.188228	0.515298	0.510477
		-0.0685461	-0.0295462	0.0585805		0.751781	0.997466	0.0824969		0.550474	1	0.0410554		-0.745853	-0.660793	-0.0169154		0.974077	0.831494	0.410594		0.966415	0.871276	-0.0271375		-0.986249	-0.619481	0.0465143		0.614154	0.0844135	0.325967		0.772251	1	0.0411751		-0.649451	-0.956259	0.137882		0.0778322	-0.580016	0.620279		0.178666	0.501228	0.51773
		-0.08221	-0.0428449	0.061882		0.767231	0.998362	0.086689		0.558391	1	0.0427342		-0.754756	-0.679316	-0.0135104		0.969427	0.822259	0.406805		0.968351	0.86985	-0.0279679		-0.985176	-0.630313	0.0507874		0.594661	0.0715065	0.333847		0.766027	1	0.0416073		-0.63882	-0.948333	0.14346		0.0555553	-0.593677	0.630762		0.169069	0.487158	0.526214
		-0.0933847	-0.0561012	0.0652016		0.782376	0.999073	0.0911644		0.566269	1	0.043383		-0.761941	-0.697234	-0.00982665		0.964092	0.812809	0.403868		0.970203	0.868424	-0.0287948		-0.984162	-0.640481	0.0553113		0.5746	0.0585539	0.34243		0.759716	1	0.0422152		-0.630142	-0.939571	0.148992		0.0329813	-0.607094	0.641323		0.159438	0.473088	0.536037
		-0.102817	-0.0692967	0.0685391		0.79719	0.999537	0.0958445		0.574108	1	0.0430329		-0.767938	-0.714537	-0.00586328		0.958058	0.802799	0.401823		0.97197	0.866935	-0.0297376		-0.983211	-0.64999	0.0600732		0.55398	0.045508	0.35174		0.753318	1	0.0431852		-0.622835	-0.930003	0.154471		0.0101239	-0.620349	0.651867		0.149774	0.459018	0.547228
		-0.111061	-0.0824166	0.0718978		0.811647	0.999876	0.100617		0.581906	1	0.0418047		-0.773129	-0.731218	-0.00162156		0.951313	0.792559	0.400694		0.973651	0.865353	-0.0309276		-0.982307	-0.658843	0.0650603		0.532808	0.0323934	0.361791		0.746833	1	0.0446787		-0.61624	-0.91966	0.159896		-0.0129999	-0.633203	0.662307		0.140077	0.44423	0.559728
		-0.118516	-0.0954503	0.0752841		0.825721	0.999965	0.105346		0.589662	1	0.039893		-0.777781	-0.747274	0.00289502		0.943844	0.781974	0.400497		0.975246	0.86377	-0.0324872		-0.981432	-0.667049	0.0702592		0.511094	0.0192329	0.372584		0.740262	1	0.0468293		-0.610303	-0.908575	0.165264		-0.0363735	-0.645898	0.67257		0.13035	0.428963	0.573392
		-0.125459	-0.108391	0.0787061		0.839387	0.999859	0.109882		0.597376	1	0.0375346		-0.782079	-0.762704	0.00768087		0.935638	0.770923	0.401239		0.976754	0.862188	-0.0345039		-0.980567	-0.674618	0.0756563		0.488846	0.00596731	0.384098		0.733605	0.999544	0.0497406		-0.604837	-0.896786	0.170577		-0.0599799	-0.658355	0.682587		0.120592	0.413696	0.587996
		-0.132078	-0.121235	0.082173		0.852617	0.999624	0.114074		0.605047	1	0.0349729		-0.786144	-0.77751	0.0127281		0.926689	0.759638	0.402924		0.978175	0.860606	-0.0370048		-0.979696	-0.68156	0.0812371		0.466073	-0.00733525	0.396292		0.726862	0.998783	0.053479		-0.599458	-0.884328	0.175838		-0.0838022	-0.6705	0.692298		0.110806	0.398429	0.60325
		-0.138497	-0.133979	0.0856942		0.865384	0.999052	0.117774		0.612672	1	0.0324332		-0.790055	-0.791698	0.0180263		0.916992	0.747889	0.405548		0.979508	0.859024	-0.0399426		-0.978808	-0.687891	0.0869861		0.442784	-0.0206932	0.4091		0.720034	0.998022	0.0580621		-0.594255	-0.871242	0.18105		-0.107824	-0.682491	0.701647		0.100991	0.383162	0.618825
		-0.144794	-0.146621	0.0892788		0.877663	0.998341	0.120851		0.620253	1	0.0301091		-0.793863	-0.805276	0.0235619		0.906546	0.735797	0.409102		0.980751	0.857442	-0.0432015		-0.977896	-0.693626	0.0928875		0.418989	-0.0341144	0.422438		0.713121	0.997261	0.0634446		-0.589247	-0.857567	0.18622		-0.132027	-0.694174	0.710585		0.0911502	0.367896	0.63437
		-0.151018	-0.159163	0.0929344		0.889428	0.997421	0.123187		0.627787	1	0.0281525		-0.797597	-0.818254	0.0293186		0.895346	0.723476	0.413569		0.981906	0.855789	-0.0466227		-0.976954	-0.698783	0.0989245		0.394702	-0.0475649	0.436212		0.706123	0.9965	0.0695095		-0.584158	-0.843345	0.191351		-0.156396	-0.705628	0.719072		0.0812831	0.352414	0.649534
		-0.157198	-0.171606	0.0966654		0.900651	0.996213	0.124689		0.635273	1	0.0266618		-0.801277	-0.830648	0.0352775		0.88339	0.710598	0.418916		0.982971	0.854135	-0.0500386		-0.975978	-0.703381	0.10508		0.369944	-0.0610694	0.450325		0.699041	0.995739	0.0760711		-0.579081	-0.828619	0.19645		-0.180908	-0.71693	0.727074		0.0713911	0.336075	0.66399
		-0.16335	-0.18395	0.100473		0.911308	0.994859	0.125292		0.642711	1	0.0256718		-0.804912	-0.842473	0.0414181		0.870673	0.697504	0.425098		0.983944	0.852482	-0.0533019		-0.974968	-0.707443	0.111337		0.344735	-0.0746095	0.464685		0.691875	0.994043	0.0828896		-0.574068	-0.81343	0.201521		-0.205537	-0.727852	0.734567		0.0614754	0.319737	0.67746
		-0.169484	-0.196199	0.104354		0.921376	0.993206	0.124962		0.650099	1	0.0251514		-0.808509	-0.85375	0.0477191		0.857193	0.684086	0.432052		0.984827	0.850829	-0.0563017		-0.97392	-0.710991	0.11768		0.319095	-0.0881733	0.479213		0.684626	0.988606	0.0896958		-0.568906	-0.797822	0.20657		-0.230258	-0.73862	0.741535		0.0515369	0.303398	0.689743
		-0.175604	-0.208351	0.1083		0.930832	0.99132	0.1237		0.657437	1	0.0250167		-0.812069	-0.864497	0.0541595		0.842948	0.670248	0.4397		0.985618	0.849176	-0.0589604		-0.972835	-0.714049	0.12409		0.293043	-0.101792	0.493845		0.677293	0.983168	0.0962202		-0.563753	-0.781836	0.2116		-0.255047	-0.74916	0.747969		0.0415768	0.287059	0.700736
		-0.181711	-0.220408	0.1123		0.939652	0.989278	0.121543		0.664723	1	0.0251527		-0.815594	-0.874735	0.060719		0.827942	0.656203	0.447957		0.986316	0.847523	-0.0612184		-0.971713	-0.716641	0.130551		0.2666	-0.115432	0.50853		0.669877	0.977731	0.102225		-0.558746	-0.765514	0.216614		-0.279878	-0.759391	0.753867		0.031596	0.27072	0.710437
		-0.187813	-0.232369	0.116341		0.947812	0.986826	0.118565		0.671956	1	0.0254329		-0.819088	-0.884484	0.067378		0.812185	0.641749	0.456727		0.986921	0.845854	-0.0630203		-0.970552	-0.718788	0.137048		0.239786	-0.129104	0.523228		0.662378	0.972293	0.107531		-0.553598	-0.748899	0.221615		-0.304726	-0.769467	0.759233		0.0215956	0.254381	0.718932
		-0.193907	-0.244232	0.120404		0.955289	0.984204	0.114872		0.679135	1	0.0257319		-0.82255	-0.89376	0.0741176		0.795686	0.626996	0.465912		0.987433	0.844174	-0.0643104		-0.969353	-0.720511	0.143565		0.21262	-0.142821	0.537904		0.654797	0.966855	0.112044		-0.548376	-0.732034	0.226604		-0.329566	-0.779233	0.764078		0.0115766	0.237299	0.726379
		-0.199994	-0.255995	0.124475		0.962061	0.981324	0.110605		0.68626	1	0.0259294		-0.825978	-0.902581	0.0809198		0.778455	0.612043	0.475411		0.98785	0.842494	-0.0650434		-0.968115	-0.72183	0.150089		0.185129	-0.156562	0.552523		0.647135	0.961418	0.115772		-0.543298	-0.714956	0.231581		-0.354372	-0.788765	0.76842		0.00154007	0.220032	0.732977
		-0.206073	-0.267652	0.128535		0.968102	0.978092	0.105922		0.693329	1	0.0259085		-0.829375	-0.91096	0.0877685		0.760502	0.596604	0.485124		0.988172	0.840814	-0.0652054		-0.966839	-0.722761	0.156607		0.157343	-0.170349	0.56705		0.63939	0.955723	0.118829		-0.538029	-0.697703	0.236546		-0.379116	-0.798142	0.772286		-0.00851292	0.202765	0.738954
		-0.212143	-0.2792	0.132567		0.973397	0.974682	0.100998		0.70034	1	0.0255547		-0.832738	-0.918907	0.09465		0.741836	0.580976	0.494955		0.988398	0.839134	-0.0648348		-0.965526	-0.723319	0.163108		0.129291	-0.184175	0.58145		0.631565	0.949964	0.121433		-0.5327	-0.68031	0.241498		-0.403766	-0.807129	0.775708		-0.0185814	0.185498	0.744548
		-0.218206	-0.290631	0.136559		0.97793	0.970916	0.0960053		0.707293	1	0.0247627		-0.836069	-0.926432	0.101553		0.722467	0.565064	0.504813		0.988528	0.837454	-0.0640294		-0.964174	-0.723516	0.169586		0.101002	-0.198025	0.595691		0.623658	0.944205	0.123884		-0.52764	-0.66281	0.246434		-0.428292	-0.815959	0.778728		-0.0286642	0.168231	0.74999
		-0.22426	-0.30194	0.140498		0.981686	0.966879	0.0911104		0.714188	1	0.023447		-0.839367	-0.933544	0.108467		0.702404	0.548782	0.514613		0.988562	0.835785	-0.0629386		-0.962784	-0.723364	0.176034		0.0725074	-0.211942	0.609741		0.615671	0.938446	0.126531		-0.522359	-0.645233	0.251353		-0.452663	-0.824556	0.781396		-0.0387604	0.150964	0.755486
		-0.230304	-0.313122	0.144378		0.984651	0.962662	0.08646		0.721022	1	0.0215597		-0.842631	-0.940249	0.115385		0.681666	0.532317	0.524281		0.988498	0.83416	-0.0617447		-0.961356	-0.72287	0.18245		0.0438351	-0.225887	0.623569		0.607603	0.932687	0.129748		-0.516981	-0.627608	0.256254		-0.476848	-0.832841	0.78377		-0.0488689	0.133451	0.761192
		-0.23634	-0.324171	0.148195		0.986809	0.957987	0.0821784		0.727794	1	0.0191101		-0.845863	-0.946554	0.122302		0.660276	0.515487	0.533747		0.988336	0.832535	-0.0606394		-0.95989	-0.722043	0.188837		0.0150153	-0.239871	0.637148		0.599456	0.926928	0.133905		-0.511766	-0.609961	0.261137		-0.500816	-0.840971	0.785911		-0.0589887	0.115569	0.767199
		-0.242367	-0.335083	0.151953		0.988145	0.953123	0.0783636		0.734504	1	0.0161797		-0.849061	-0.952465	0.129213		0.638255	0.498391	0.54295		0.988077	0.830911	-0.0597996		-0.958386	-0.720892	0.195197		-0.0139223	-0.253907	0.650449		0.591229	0.921152	0.139342		-0.506319	-0.592318	0.266003		-0.524537	-0.848791	0.787883		-0.0691188	0.0976876	0.77353
		-0.248384	-0.345856	0.155656		0.988646	0.947977	0.0750861		0.741151	1	0.0129247		-0.852225	-0.957989	0.136117		0.615626	0.481119	0.551839		0.987719	0.829286	-0.0593663		-0.956844	-0.719423	0.201535		-0.0429448	-0.267966	0.663444		0.582923	0.91535	0.146356		-0.500976	-0.574703	0.270854		-0.547979	-0.85638	0.789753		-0.079258	0.0798058	0.780131
		-0.254391	-0.35649	0.159315		0.988296	0.942445	0.072387		0.747733	1	0.00956003		-0.855356	-0.963132	0.143013		0.592411	0.463425	0.560368		0.987262	0.827661	-0.0594264		-0.955264	-0.717645	0.207856		-0.0720174	-0.282069	0.676103		0.57454	0.909548	0.155172		-0.495721	-0.557136	0.275691		-0.571111	-0.863815	0.791585		-0.0894054	0.0619239	0.786892
		-0.260388	-0.366984	0.162943		0.98709	0.936719	0.0702793		0.75425	1	0.00633025		-0.858453	-0.967904	0.149899		0.568633	0.445574	0.568505		0.986707	0.826037	-0.0599991		-0.953647	-0.715565	0.214165		-0.101106	-0.296199	0.688393		0.566079	0.903746	0.165926		-0.490233	-0.539635	0.280516		-0.593902	-0.870867	0.793442		-0.0995599	0.0440421	0.793657
		-0.266375	-0.377339	0.166558		0.985025	0.930604	0.0687503		0.760699	1	0.00347423		-0.861516	-0.972312	0.156777		0.544314	0.427486	0.576225		0.986052	0.824524	-0.061035		-0.951992	-0.713192	0.220464		-0.130175	-0.310347	0.700279		0.557543	0.897945	0.178644		-0.484832	-0.522218	0.285331		-0.61632	-0.877767	0.795381		-0.10972	0.0261603	0.800256
		-0.272351	-0.387555	0.170177		0.9821	0.924199	0.0677647		0.767081	1	0.00119062		-0.864545	-0.976362	0.163644		0.519477	0.409105	0.583519		0.985297	0.823039	-0.0624318		-0.9503	-0.710536	0.226755		-0.159191	-0.32453	0.711723		0.548931	0.892143	0.193229		-0.479489	-0.504901	0.290137		-0.638334	-0.88444	0.797455		-0.119886	0.0081132	0.806525
		-0.278316	-0.397636	0.173816		0.978313	0.917599	0.0672687		0.773394	1	-0.000388034		-0.86754	-0.980063	0.170498		0.494151	0.390583	0.590383		0.984442	0.821555	-0.0640659		-0.94857	-0.707604	0.233041		-0.188118	-0.338721	0.72269		0.540245	0.886341	0.209464		-0.474069	-0.487697	0.294935		-0.659912	-0.890813	0.799711		-0.130056	-0.00993389	0.812333
		-0.284271	-0.407584	0.177491		0.973662	0.910518	0.0671972		0.779637	1	-0.00120881		-0.870501	-0.983421	0.177335		0.468366	0.371791	0.596824		0.983487	0.82007	-0.0658278		-0.946802	-0.704408	0.239324		-0.216922	-0.352925	0.733151		0.531486	0.880535	0.227012		-0.468592	-0.470621	0.299726		-0.681023	-0.897037	0.802192		-0.140228	-0.027981	0.817584
		-0.290214	-0.4174	0.181212		0.968145	0.903245	0.0674815		0.785809	1	-0.00129864		-0.873427	-0.986442	0.184152		0.442155	0.352812	0.602854		0.982431	0.818585	-0.0676468		-0.944998	-0.700954	0.245602		-0.245569	-0.367131	0.743086		0.522653	0.874729	0.245443		-0.463122	-0.453686	0.30451		-0.701636	-0.902964	0.804935		-0.150403	-0.0460281	0.822222
		-0.296146	-0.427082	0.184988		0.96176	0.895686	0.0680563		0.791909	1	-0.000750037		-0.876319	-0.989135	0.190943		0.415549	0.333709	0.608494		0.981274	0.817101	-0.0694958		-0.943155	-0.697253	0.251879		-0.274024	-0.381334	0.752484		0.51375	0.868923	0.264263		-0.457605	-0.436902	0.309284		-0.721718	-0.908671	0.807969		-0.160578	-0.0640752	0.826233
		-0.302066	-0.436629	0.18882		0.954506	0.887745	0.0688667		0.797936	1	0.000302071		-0.879176	-0.991505	0.197706		0.388581	0.314321	0.613771		0.980015	0.815685	-0.0713761		-0.941276	-0.693313	0.258152		-0.302256	-0.395522	0.761339		0.504775	0.863117	0.282962		-0.452069	-0.420278	0.314044		-0.741244	-0.914231	0.81132		-0.170753	-0.0821223	0.829634
		-0.307974	-0.446036	0.192708		0.946391	0.879612	0.0698735		0.803889	1	0.00170274		-0.881999	-0.993562	0.204438		0.361281	0.294828	0.618725		0.978655	0.814373	-0.0732935		-0.93936	-0.689141	0.264421		-0.33023	-0.409686	0.769656		0.49573	0.857311	0.30105		-0.446582	-0.403821	0.318785		-0.760186	-0.919431	0.815006		-0.180926	-0.100035	0.832481
		-0.31387	-0.455297	0.196648		0.937427	0.871096	0.0710572		0.809766	1	0.00329362		-0.884787	-0.995314	0.211136		0.333681	0.275177	0.623404		0.977192	0.813061	-0.0752408		-0.937406	-0.684748	0.270685		-0.357913	-0.423834	0.777442		0.486616	0.851505	0.318097		-0.44097	-0.387537	0.323503		-0.778519	-0.924488	0.819038		-0.191095	-0.117858	0.834855
		-0.319754	-0.464408	0.200633		0.927626	0.862288	0.0724187		0.815566	1	0.00492197		-0.887539	-0.99677	0.2178		0.305813	0.255333	0.627866		0.975626	0.811749	-0.0771951		-0.935415	-0.680144	0.276942		-0.385273	-0.43792	0.784714		0.477433	0.845581	0.333758		-0.435446	-0.37143	0.328189		-0.796218	-0.929332	0.823423		-0.20126	-0.135681	0.83687
		-0.325625	-0.473361	0.204655		0.917002	0.853286	0.073976		0.82129	1	0.00644318		-0.890257	-0.997941	0.224428		0.27771	0.2354	0.632181		0.973958	0.810437	-0.0791314		-0.933388	-0.675338	0.283192		-0.412276	-0.451975	0.79149		0.468183	0.839579	0.347788		-0.429987	-0.355502	0.33284		-0.813257	-0.933896	0.828158		-0.21142	-0.153505	0.838667
		-0.331483	-0.482155	0.208706		0.905566	0.843788	0.0757589		0.826934	1	0.00772182		-0.89294	-0.998837	0.231022		0.249409	0.2153	0.636429		0.972186	0.809126	-0.0810448		-0.931324	-0.670343	0.289433		-0.43889	-0.465983	0.797792		0.458867	0.833576	0.360059		-0.424249	-0.339753	0.33745		-0.82961	-0.938321	0.833236		-0.221572	-0.171328	0.840412
		-0.337328	-0.490786	0.212778		0.893331	0.834085	0.0778041		0.832499	1	0.00863544		-0.895587	-0.99947	0.23758		0.220942	0.195096	0.6407		0.970311	0.807814	-0.0829671		-0.929222	-0.665169	0.295663		-0.465081	-0.479916	0.803636		0.449485	0.827574	0.370566		-0.418519	-0.324185	0.342016		-0.845251	-0.942471	0.838642		-0.231715	-0.189151	0.842291
		-0.34316	-0.499256	0.216864		0.88031	0.824078	0.0801481		0.837983	1	0.00908163		-0.898199	-0.999853	0.244105		0.192344	0.174823	0.64509		0.968331	0.806657	-0.0849707		-0.927085	-0.659827	0.30188		-0.490822	-0.493808	0.809038		0.440038	0.821571	0.379417		-0.412972	-0.308798	0.346536		-0.860156	-0.946418	0.844353		-0.241848	-0.206882	0.844493
		-0.348978	-0.507565	0.220957		0.866515	0.813652	0.0828212		0.843386	1	0.00898691		-0.900776	-1	0.250596		0.163651	0.154414	0.649695		0.966247	0.805501	-0.0871586		-0.92491	-0.654326	0.308086		-0.516088	-0.507613	0.814011		0.430527	0.815569	0.386819		-0.407362	-0.293593	0.351012		-0.874306	-0.95023	0.850338		-0.25197	-0.224246	0.847192
		-0.354783	-0.515717	0.225053		0.851967	0.803014	0.0858419		0.848706	1	0.00831945		-0.903317	-0.999922	0.257054		0.134898	0.133963	0.654604		0.964059	0.804345	-0.0896468		-0.922699	-0.648672	0.31428		-0.540853	-0.521347	0.818563		0.420953	0.809462	0.393049		-0.401712	-0.278571	0.355446		-0.887687	-0.953711	0.856556		-0.26208	-0.24161	0.850534
		-0.360573	-0.523714	0.229149		0.83669	0.79195	0.0892134		0.853941	1	0.00710871		-0.905822	-0.999632	0.26348		0.106117	0.113451	0.659895		0.961765	0.803188	-0.0925448		-0.920452	-0.64287	0.320465		-0.565093	-0.535033	0.822701		0.411316	0.802936	0.398423		-0.396069	-0.263732	0.359844		-0.900285	-0.957063	0.862957		-0.272175	-0.258974	0.854613
		-0.366349	-0.531558	0.233245		0.820708	0.780562	0.092923		0.859092	1	0.00546319		-0.908292	-0.999142	0.269875		0.0773457	0.0928819	0.665633		0.959366	0.802032	-0.0959362		-0.918168	-0.636923	0.326645		-0.588783	-0.548586	0.826425		0.401618	0.79641	0.403271		-0.390297	-0.249077	0.364212		-0.912085	-0.96022	0.86948		-0.282255	-0.276337	0.859474
		-0.372111	-0.539255	0.237343		0.804046	0.76896	0.096943		0.864157	1	0.00357087		-0.910725	-0.99846	0.276242		0.0486145	0.0722904	0.671868		0.956861	0.800876	-0.0998592		-0.915848	-0.630833	0.332821		-0.611897	-0.56208	0.829736		0.39186	0.789884	0.407904		-0.384566	-0.234606	0.368559		-0.923073	-0.963123	0.876058		-0.292318	-0.293701	0.865107
		-0.377858	-0.546808	0.241446		0.786728	0.756823	0.101233		0.869135	1	0.00167628		-0.913123	-0.997596	0.28258		0.0199548	0.0516657	0.678631		0.954249	0.799763	-0.104286		-0.913492	-0.624602	0.338996		-0.63441	-0.575484	0.832629		0.382042	0.783359	0.412589		-0.378869	-0.220319	0.372894		-0.933234	-0.9659	0.882617		-0.302363	-0.311065	0.871463
		-0.38359	-0.55422	0.245559		0.768779	0.744479	0.105742		0.874026	1	4.19472e-05		-0.915485	-0.996555	0.288892		-0.00860221	0.0310313	0.685939		0.951532	0.798678	-0.109109		-0.9111	-0.618234	0.345168		-0.656298	-0.588753	0.835101		0.372165	0.776833	0.417525		-0.373019	-0.206214	0.377224		-0.942556	-0.968429	0.889076		-0.312389	-0.327907	0.878463
		-0.389307	-0.561493	0.249688		0.750223	0.731822	0.110411		0.878828	1	-0.00109218		-0.91781	-0.995345	0.295181		-0.0370257	0.0103904	0.693784		0.948707	0.797594	-0.114147		-0.908672	-0.611732	0.351337		-0.677545	-0.60195	0.83715		0.36223	0.770307	0.422833		-0.36729	-0.192292	0.381558		-0.951023	-0.970776	0.895351		-0.322394	-0.344619	0.886014
		-0.395009	-0.568632	0.25384		0.731084	0.718762	0.115169		0.88354	0.999883	-0.00153989		-0.9201	-0.99397	0.301446		-0.0652846	-0.0102461	0.702138		0.945775	0.79651	-0.119164		-0.906208	-0.6051	0.357502		-0.698136	-0.614995	0.838782		0.352238	0.763053	0.428546		-0.361562	-0.178551	0.385903		-0.958632	-0.973001	0.901356		-0.332376	-0.36133	0.894019
		-0.400695	-0.575638	0.258018		0.711391	0.705504	0.119941		0.888162	0.999295	-0.00118677		-0.922353	-0.992435	0.307686		-0.0933479	-0.0308741	0.71095		0.942735	0.795425	-0.123919		-0.903708	-0.598345	0.363663		-0.718059	-0.627914	0.840013		0.34219	0.755616	0.434625		-0.355729	-0.164993	0.390266		-0.965381	-0.974931	0.907004		-0.342336	-0.378042	0.902373
		-0.406365	-0.582512	0.262225		0.691175	0.691858	0.124649		0.892692	0.998708	1.8091e-06		-0.924569	-0.990744	0.313901		-0.121185	-0.0514891	0.720148		0.939587	0.794341	-0.128201		-0.901173	-0.591472	0.369817		-0.737302	-0.640749	0.840871		0.332087	0.74818	0.440969		-0.349966	-0.151615	0.394647		-0.971271	-0.976745	0.912213		-0.35227	-0.394753	0.910964
		-0.41202	-0.58926	0.266461		0.670467	0.677929	0.129227		0.89713	0.998121	0.00198168		-0.92675	-0.9889	0.320089		-0.148764	-0.0720721	0.729643		0.936332	0.793238	-0.131865		-0.898602	-0.584489	0.375964		-0.755851	-0.653355	0.841398		0.321929	0.740743	0.447436		-0.344101	-0.138416	0.399046		-0.976302	-0.978386	0.9169		-0.362178	-0.411464	0.919667
		-0.417657	-0.595884	0.270722		0.649298	0.663812	0.133628		0.901475	0.997534	0.00464365		-0.928893	-0.98691	0.326245		-0.176061	-0.0926337	0.739335		0.932967	0.792058	-0.134839		-0.895995	-0.577403	0.382101		-0.773694	-0.665863	0.841653		0.311717	0.733306	0.453865		-0.33824	-0.125397	0.403462		-0.980474	-0.979803	0.920992		-0.372059	-0.427811	0.928344
		-0.423279	-0.602391	0.275001		0.627697	0.649231	0.137835		0.905725	0.996946	0.00783732		-0.931	-0.984777	0.332367		-0.203053	-0.113142	0.749116		0.929495	0.790878	-0.137108		-0.893353	-0.570222	0.388227		-0.790818	-0.678224	0.841707		0.301453	0.72587	0.460097		-0.332444	-0.112555	0.407889		-0.983786	-0.981108	0.924424		-0.381911	-0.443608	0.936854
		-0.428884	-0.608782	0.279289		0.605697	0.634467	0.141867		0.909881	0.996359	0.0113956		-0.93307	-0.982509	0.338451		-0.229719	-0.13359	0.758883		0.925915	0.789698	-0.138697		-0.890676	-0.562952	0.394338		-0.80721	-0.690375	0.841641		0.291137	0.717894	0.466001		-0.326622	-0.0998893	0.41232		-0.986239	-0.982195	0.927145		-0.391733	-0.459406	0.945061
		-0.434471	-0.615062	0.283576		0.583328	0.619426	0.145782		0.91394	0.99331	0.0151541		-0.935103	-0.980109	0.344495		-0.256035	-0.153998	0.768537		0.922227	0.788518	-0.139655		-0.887964	-0.555599	0.400434		-0.822866	-0.702419	0.841543		0.28077	0.70911	0.471491		-0.320717	-0.0873979	0.416748		-0.987833	-0.983122	0.929117		-0.401523	-0.475204	0.952851
		-0.440042	-0.62123	0.287852		0.560621	0.604018	0.149671		0.917902	0.989646	0.0189609		-0.9371	-0.977586	0.350494		-0.281979	-0.174269	0.777998		0.918432	0.787338	-0.140039		-0.885216	-0.548171	0.406514		-0.837786	-0.714242	0.841501		0.270354	0.700326	0.476541		-0.314783	-0.0750791	0.421164		-0.988577	-0.983943	0.93032		-0.41128	-0.491002	0.960134
		-0.445595	-0.627287	0.292104		0.537607	0.588427	0.153648		0.921765	0.985982	0.0226763		-0.939059	-0.974946	0.356445		-0.30753	-0.194472	0.787202		0.914528	0.786159	-0.139918		-0.882434	-0.540674	0.412576		-0.851971	-0.725892	0.841599		0.259891	0.691542	0.481197		-0.308974	-0.0629314	0.425562		-0.988484	-0.984506	0.930754		-0.421003	-0.5068	0.96685
		-0.451131	-0.633233	0.296325		0.514316	0.572473	0.157841		0.92553	0.982318	0.0261683		-0.940981	-0.972193	0.362345		-0.332664	-0.214573	0.796106		0.910518	0.784703	-0.139374		-0.879617	-0.533116	0.418622		-0.865419	-0.737426	0.841919		0.249381	0.682758	0.48557		-0.303078	-0.0509537	0.429936		-0.987566	-0.984969	0.930434		-0.43069	-0.522598	0.972964
		-0.456649	-0.639066	0.300507		0.49078	0.556251	0.162379		0.929195	0.978654	0.0293099		-0.942866	-0.969334	0.368191		-0.357361	-0.234515	0.804687		0.906399	0.783179	-0.138519		-0.876765	-0.525505	0.424653		-0.878132	-0.748659	0.842539		0.238826	0.673974	0.489836		-0.297138	-0.0391453	0.434282		-0.985839	-0.985282	0.929399		-0.44034	-0.537208	0.978459
		-0.462149	-0.644787	0.304645		0.467029	0.539851	0.167386		0.93276	0.97499	0.0319813		-0.944714	-0.966374	0.373981		-0.381604	-0.254372	0.812943		0.902174	0.781654	-0.137496		-0.873878	-0.517847	0.430673		-0.890108	-0.759767	0.843529		0.228228	0.66519	0.494212		-0.291224	-0.0275057	0.438597		-0.983313	-0.985398	0.927702		-0.449952	-0.551817	0.983337
		-0.46763	-0.650397	0.308736		0.443095	0.523013	0.172971		0.936222	0.971435	0.034075		-0.946525	-0.963318	0.379711		-0.405383	-0.274047	0.820887		0.897842	0.78013	-0.136476		-0.870957	-0.510149	0.436685		-0.901349	-0.770687	0.844958		0.217587	0.654586	0.498945		-0.285263	-0.0160351	0.442883		-0.980003	-0.985416	0.925408		-0.459524	-0.566426	0.987613
		-0.473093	-0.655895	0.31278		0.419008	0.506002	0.179221		0.939582	0.968045	0.0355085		-0.948298	-0.960171	0.38538		-0.428686	-0.293572	0.828549		0.893402	0.778605	-0.135638		-0.868002	-0.502414	0.442697		-0.911854	-0.78135	0.846887		0.206906	0.643981	0.504286		-0.279297	-0.00473417	0.447139		-0.975922	-0.98524	0.922588		-0.469055	-0.581036	0.991311
		-0.478538	-0.661285	0.316782		0.3948	0.488732	0.186196		0.942838	0.964654	0.0362444		-0.950034	-0.956936	0.390985		-0.451501	-0.312997	0.835973		0.888856	0.777081	-0.135148		-0.865012	-0.494647	0.448714		-0.921631	-0.791882	0.849367		0.196185	0.633377	0.510477		-0.273366	0.00639612	0.45137		-0.971084	-0.984918	0.919318		-0.478544	-0.595645	0.994466
		-0.483963	-0.66657	0.320747		0.3705	0.471121	0.193928		0.945989	0.961263	0.0363102		-0.951732	-0.953616	0.396526		-0.473818	-0.332144	0.84321		0.884203	0.775302	-0.135137		-0.861989	-0.486849	0.454744		-0.93069	-0.802148	0.85244		0.185426	0.622772	0.51773		-0.267412	0.0173549	0.455578		-0.965507	-0.984499	0.91567		-0.487988	-0.610255	0.997115
		-0.48937	-0.671752	0.324685		0.346137	0.453341	0.202417		0.949035	0.957872	0.0358035		-0.953393	-0.950216	0.402002		-0.495624	-0.35117	0.850321		0.879444	0.773142	-0.135683		-0.858931	-0.479022	0.460792		-0.939041	-0.812211	0.85613		0.17463	0.612168	0.526214		-0.261323	0.0281412	0.459768		-0.959213	-0.983838	0.911716		-0.497388	-0.624036	0.9993
		-0.494757	-0.676834	0.328611		0.321737	0.435227	0.21164		0.951974	0.954481	0.0348784		-0.955016	-0.946738	0.407414		-0.516908	-0.370012	0.857368		0.874577	0.770982	-0.136796		-0.855839	-0.471168	0.466859		-0.946695	-0.822138	0.860444		0.163799	0.601563	0.536037		-0.255398	0.038754	0.463942		-0.952226	-0.983079	0.907524		-0.506741	-0.637266	1.00107
		-0.500125	-0.681817	0.332538		0.297324	0.416875	0.221544		0.954806	0.951091	0.0337189		-0.956601	-0.943186	0.412765		-0.53766	-0.388588	0.864406		0.869605	0.768822	-0.138408		-0.852714	-0.463287	0.472946		-0.953661	-0.831717	0.865368		0.152934	0.589634	0.547228		-0.249461	0.0491942	0.468105		-0.944567	-0.982174	0.903156		-0.516045	-0.650496	1.00246
		-0.505472	-0.686701	0.336484		0.272926	0.398363	0.232049		0.95753	0.948226	0.032512		-0.958149	-0.939564	0.418054		-0.557874	-0.407024	0.871485		0.864526	0.766662	-0.14038		-0.849554	-0.455382	0.479051		-0.959951	-0.841154	0.870866		0.142037	0.576821	0.559728		-0.243352	0.059463	0.47226		-0.936259	-0.981076	0.898669		-0.5253	-0.663725	1.00351
		-0.5108	-0.691484	0.340462		0.248567	0.379479	0.243049		0.960144	0.945361	0.0314306		-0.959659	-0.935876	0.423285		-0.577549	-0.425172	0.878638		0.859341	0.764502	-0.14252		-0.846362	-0.447454	0.485168		-0.965575	-0.850379	0.876886		0.131108	0.564009	0.573392		-0.23734	0.0695617	0.476407		-0.927324	-0.97988	0.89411		-0.534504	-0.676955	1.00428
		-0.516108	-0.696164	0.344487		0.224274	0.360462	0.254421		0.962648	0.942497	0.0306236		-0.961131	-0.932127	0.428458		-0.596683	-0.443087	0.885883		0.85405	0.762342	-0.144623		-0.843135	-0.439506	0.491292		-0.970544	-0.859316	0.883362		0.12015	0.551196	0.587996		-0.231242	0.0794919	0.480545		-0.917784	-0.978489	0.889518		-0.543656	-0.690184	1.00481
		-0.521395	-0.70074	0.348568		0.200072	0.341243	0.26603		0.965041	0.939632	0.0302061		-0.962565	-0.928321	0.433574		-0.615274	-0.460848	0.893219		0.848653	0.759313	-0.1465		-0.839876	-0.431541	0.497415		-0.974871	-0.868107	0.890221		0.109163	0.538384	0.60325		-0.225263	0.0892557	0.484671		-0.907661	-0.976953	0.884922		-0.552753	-0.70312	1.00512
		-0.526662	-0.705211	0.352708		0.175987	0.321789	0.277746		0.967321	0.936768	0.0302478		-0.963961	-0.924462	0.438633		-0.633323	-0.478198	0.900629		0.84315	0.756284	-0.148008		-0.836583	-0.423563	0.503526		-0.978574	-0.876605	0.897387		0.0981489	0.525571	0.618825		-0.219311	0.0988543	0.488776		-0.896981	-0.97532	0.880341		-0.561795	-0.714879	1.00525
		-0.531908	-0.709576	0.356908		0.152039	0.302225	0.28945		0.969489	0.933903	0.0307676		-0.965319	-0.920557	0.443635		-0.650826	-0.495377	0.908081		0.837542	0.753255	-0.149059		-0.833258	-0.415575	0.509615		-0.98167	-0.884881	0.904777		0.0871092	0.512286	0.63437		-0.213122	0.108289	0.49285		-0.88577	-0.973445	0.875778		-0.57078	-0.726638	1.00525
		-0.537133	-0.713833	0.361164		0.128246	0.282462	0.301038		0.971543	0.931525	0.0317373		-0.966638	-0.916609	0.44858		-0.667783	-0.512298	0.915528		0.831828	0.750226	-0.14961		-0.829899	-0.407584	0.515669		-0.984174	-0.893008	0.912309		0.0760452	0.497111	0.649534		-0.207112	0.117561	0.496877		-0.874052	-0.971473	0.871224		-0.579707	-0.738396	1.00512
		-0.542337	-0.717983	0.365469		0.104626	0.262574	0.312425		0.973482	0.929471	0.0330933		-0.96792	-0.912624	0.453467		-0.684192	-0.528861	0.922919		0.826009	0.747197	-0.149654		-0.826508	-0.399593	0.521677		-0.986103	-0.900759	0.9199		0.0649583	0.481935	0.66399		-0.201024	0.126669	0.500843		-0.861854	-0.969355	0.866657		-0.588574	-0.750155	1.00491
		-0.547519	-0.722028	0.369813		0.0811966	0.242604	0.323544		0.975306	0.927417	0.0347482		-0.969164	-0.908607	0.458294		-0.700057	-0.545242	0.930195		0.820084	0.744168	-0.149197		-0.823084	-0.391607	0.527629		-0.987474	-0.908358	0.927466		0.0538498	0.46676	0.67746		-0.194789	0.135615	0.504729		-0.849203	-0.967044	0.862041		-0.597381	-0.761914	1.00463
		-0.55268	-0.725969	0.374183		0.0579757	0.22247	0.33435		0.977015	0.925363	0.036596		-0.970369	-0.904564	0.463061		-0.715383	-0.561254	0.937296		0.814054	0.74056	-0.148249		-0.819628	-0.383631	0.533515		-0.988304	-0.915729	0.934923		0.0427212	0.451584	0.689743		-0.188798	0.144397	0.508517		-0.836123	-0.964637	0.857336		-0.606124	-0.773673	1.00431
		-0.557819	-0.729813	0.378567		0.0349812	0.202286	0.344819		0.978607	0.923309	0.0385117		-0.971536	-0.900501	0.467766		-0.730176	-0.57698	0.944161		0.807919	0.736565	-0.146823		-0.816139	-0.375669	0.539331		-0.988609	-0.922794	0.94219		0.0315738	0.436408	0.700736		-0.182676	0.153014	0.512189		-0.82264	-0.962037	0.852499		-0.614803	-0.784246	1.00395
		-0.562936	-0.733564	0.38295		0.0122307	0.182027	0.354946		0.980083	0.921255	0.0403489		-0.972664	-0.896423	0.472407		-0.744443	-0.592516	0.950731		0.801679	0.73257	-0.14494		-0.812618	-0.367722	0.545072		-0.988406	-0.929704	0.949192		0.0204089	0.421233	0.710437		-0.176462	0.161464	0.515729		-0.808782	-0.959293	0.847486		-0.623417	-0.794521	1.00358
		-0.568031	-0.737229	0.387316		-0.0102585	0.1617	0.364738		0.981443	0.919416	0.0419421		-0.973754	-0.892332	0.476983		-0.758189	-0.607567	0.956954		0.795334	0.728575	-0.142648		-0.809065	-0.359793	0.55074		-0.987716	-0.936304	0.955861		0.00922804	0.404263	0.718932		-0.170508	0.169747	0.51912		-0.794571	-0.956452	0.842253		-0.631964	-0.804797	1.0032
		-0.573103	-0.740815	0.391652		-0.0324738	0.141345	0.374207		0.982684	0.918434	0.0431151		-0.974806	-0.88823	0.481493		-0.771419	-0.62242	0.962782		0.788885	0.724581	-0.140024		-0.80548	-0.351885	0.556336		-0.986555	-0.94267	0.962139		-0.00196751	0.386845	0.726379		-0.16439	0.177862	0.522349		-0.780034	-0.953372	0.836761		-0.640443	-0.815073	1.00283
		-0.578152	-0.744327	0.395947		-0.0544059	0.12095	0.383366		0.983807	0.917452	0.0436956		-0.975819	-0.884117	0.485937		-0.784141	-0.636978	0.968176		0.78233	0.720586	-0.137175		-0.801863	-0.344	0.561867		-0.984942	-0.94888	0.967978		-0.0131763	0.369426	0.732977		-0.158134	0.185806	0.525403		-0.765194	-0.950197	0.830974		-0.648851	-0.825349	1.00246
		-0.583179	-0.747769	0.400189		-0.0760454	0.100546	0.392219		0.984812	0.91647	0.0435359		-0.976794	-0.879995	0.490315		-0.796359	-0.651135	0.973109		0.775672	0.716403	-0.13422		-0.798215	-0.33614	0.567339		-0.982896	-0.954696	0.973349		-0.0243971	0.352008	0.738954		-0.152093	0.193579	0.528276		-0.750076	-0.946879	0.824863		-0.657189	-0.835625	1.00212
		-0.588183	-0.751146	0.40437		-0.0973829	0.0801343	0.400759		0.985698	0.915488	0.0425348		-0.97773	-0.875862	0.494631		-0.808082	-0.665092	0.977564		0.76891	0.711469	-0.13127		-0.794535	-0.328308	0.572762		-0.980435	-0.960354	0.978231		-0.0356284	0.334589	0.744548		-0.145928	0.201179	0.530959		-0.734704	-0.94337	0.818409		-0.665454	-0.845327	1.0018
		-0.593164	-0.75446	0.408487		-0.118409	0.0597398	0.408963		0.986464	0.914506	0.0406526		-0.978627	-0.871723	0.498888		-0.81932	-0.678646	0.981539		0.762044	0.706535	-0.128408		-0.790824	-0.320504	0.578144		-0.977578	-0.965775	0.982618		-0.0468688	0.317171	0.74999		-0.139744	0.208605	0.533449		-0.719103	-0.939768	0.8116		-0.673644	-0.854167	1.0015
		-0.598121	-0.757714	0.412534		-0.139114	0.0393654	0.416792		0.987109	0.913524	0.0379152		-0.979486	-0.867578	0.503092		-0.830083	-0.691897	0.985041		0.755077	0.701601	-0.125668		-0.787081	-0.31273	0.583492		-0.974343	-0.970877	0.986515		-0.058117	0.298998	0.755486		-0.133702	0.215858	0.535745		-0.703298	-0.935977	0.804437		-0.681759	-0.863006	1.00123
		-0.603054	-0.760908	0.416514		-0.159489	0.0190209	0.424196		0.987634	0.913402	0.0344064		-0.980306	-0.863431	0.507252		-0.840381	-0.704945	0.988087		0.748008	0.696667	-0.123024		-0.783307	-0.304984	0.588811		-0.970747	-0.975818	0.989934		-0.0693712	0.279693	0.761192		-0.127503	0.222941	0.537847		-0.687311	-0.932045	0.796934		-0.689797	-0.871846	1.00098
		-0.607964	-0.764043	0.420426		-0.179524	-0.00125563	0.431113		0.988038	0.913494	0.0302552		-0.981088	-0.859284	0.511378		-0.850223	-0.717487	0.990699		0.740839	0.691733	-0.120381		-0.779503	-0.297268	0.594101		-0.966807	-0.980439	0.992897		-0.0806298	0.260388	0.767199		-0.121334	0.229857	0.539757		-0.671166	-0.92802	0.789119		-0.697757	-0.880686	1.00076
		-0.61285	-0.767117	0.424275		-0.199215	-0.0214911	0.437473		0.98832	0.913586	0.025626		-0.981831	-0.85514	0.515479		-0.85962	-0.729826	0.992907		0.73357	0.686799	-0.117581		-0.775668	-0.289581	0.599363		-0.962541	-0.984818	0.995431		-0.091891	0.241082	0.77353		-0.115122	0.236613	0.541479		-0.654882	-0.923763	0.781039		-0.705636	-0.889526	1.00057
		-0.617711	-0.770129	0.428061		-0.21856	-0.0416301	0.443203		0.98848	0.913678	0.0207114		-0.982535	-0.851	0.519566		-0.868582	-0.741863	0.994742		0.726201	0.681162	-0.114415		-0.771802	-0.281924	0.604591		-0.957966	-0.989036	0.997567		-0.103153	0.221777	0.780131		-0.108884	0.243215	0.543016		-0.638477	-0.919413	0.772758		-0.713434	-0.898366	1.00041
		-0.622548	-0.773077	0.431785		-0.237555	-0.061676	0.448231		0.988517	0.91377	0.0157242		-0.9832	-0.846863	0.523646		-0.877118	-0.753498	0.996237		0.718734	0.675349	-0.110659		-0.767905	-0.274298	0.60978		-0.953098	-0.992848	0.99934		-0.114415	0.202472	0.786892		-0.102832	0.249672	0.544372		-0.621973	-0.914926	0.764355		-0.72115	-0.905859	1.00026
		-0.627361	-0.775961	0.435446		-0.256199	-0.0816598	0.452497		0.988431	0.913862	0.0108813		-0.983826	-0.842727	0.527727		-0.885239	-0.764934	0.997427		0.71117	0.669536	-0.106094		-0.763979	-0.266704	0.61492		-0.947954	-0.996351	1.00079		-0.125674	0.183167	0.793657		-0.0966108	0.255993	0.54555		-0.605389	-0.910258	0.755922		-0.728781	-0.913352	1.00014
		-0.632149	-0.77878	0.439038		-0.274488	-0.101457	0.455958		0.988221	0.914242	0.00638008		-0.984414	-0.838591	0.531813		-0.892956	-0.775971	0.998347		0.703508	0.663723	-0.10054		-0.760022	-0.259143	0.619996		-0.942552	-0.999392	1.00194		-0.136928	0.162531	0.800256		-0.0903937	0.262184	0.546551		-0.588745	-0.905499	0.74756		-0.736326	-0.920845	1.00005
		-0.636912	-0.781532	0.442552		-0.292422	-0.121169	0.458589		0.987887	0.915054	0.00237687		-0.984962	-0.834453	0.535907		-0.90028	-0.786713	0.999029		0.69575	0.65791	-0.0938593		-0.756035	-0.251618	0.624996		-0.936908	-1	1.00285		-0.148178	0.141895	0.806525		-0.0842762	0.268255	0.547377		-0.57206	-0.90056	0.739375		-0.743784	-0.928338	0.999965
		-0.641649	-0.784218	0.445974		-0.309996	-0.140753	0.460393		0.987428	0.915866	-0.00102554		-0.985472	-0.830312	0.540007		-0.907223	-0.797259	0.999507		0.687897	0.652098	-0.0859583		-0.752018	-0.244133	0.629903		-0.931037	-1	1.00353		-0.159419	0.121259	0.812333		-0.0780516	0.274213	0.548026		-0.555353	-0.895489	0.731468		-0.751154	-0.935831	0.999902
		-0.646362	-0.786837	0.449289		-0.327209	-0.160147	0.461398		0.986844	0.916678	-0.00377721		-0.985943	-0.826167	0.544112		-0.913795	-0.807321	0.99981		0.679949	0.645952	-0.0767793		-0.747972	-0.236689	0.634698		-0.924953	-1	1.00403		-0.170651	0.100623	0.817584		-0.0718672	0.280065	0.5485		-0.538642	-0.890329	0.723933		-0.758434	-0.943324	0.999853
		-0.651049	-0.789392	0.452477		-0.344062	-0.179441	0.461659		0.986133	0.917489	-0.00587208		-0.986375	-0.822016	0.548213		-0.920008	-0.817192	0.999965		0.671908	0.639306	-0.0662912		-0.743896	-0.22929	0.639364		-0.91867	-1	1.00438		-0.181873	0.0799869	0.822222		-0.0656743	0.285817	0.548798		-0.521938	-0.884953	0.716851		-0.765623	-0.950079	0.999817
		-0.65571	-0.791886	0.455515		-0.360557	-0.198529	0.461258		0.985297	0.918301	-0.00733981		-0.986768	-0.817858	0.552303		-0.925872	-0.826779	1		0.663773	0.63266	-0.0544879		-0.73979	-0.22194	0.643883		-0.9122	-1	1.0046		-0.193081	0.059351	0.826233		-0.0594812	0.291474	0.548919		-0.505257	-0.87949	0.71029		-0.77272	-0.956341	0.999793
		-0.660345	-0.794317	0.458381		-0.376696	-0.217451	0.460302		0.984333	0.919113	-0.00824348		-0.987122	-0.813691	0.556368		-0.931399	-0.83599	0.999937		0.655545	0.626014	-0.0413999		-0.735656	-0.21464	0.648239		-0.905559	-1	1.00473		-0.204276	0.0383505	0.829634		-0.0532271	0.297044	0.548864		-0.488612	-0.8739	0.704302		-0.779723	-0.962604	0.999778
		-0.664954	-0.796689	0.461051		-0.392482	-0.236262	0.45892		0.983242	0.920052	-0.0086803		-0.987437	-0.809517	0.560392		-0.9366	-0.845015	0.999797		0.647226	0.619368	-0.0271158		-0.731492	-0.207394	0.652417		-0.898759	-1	1.00478		-0.215454	0.017107	0.832481		-0.0470279	0.302532	0.548632		-0.472016	-0.868143	0.698926		-0.786632	-0.968867	0.999771
		-0.669537	-0.799001	0.463502		-0.407917	-0.254781	0.457257		0.982023	0.920992	-0.00878184		-0.987713	-0.805336	0.564358		-0.941484	-0.853668	0.999598		0.638817	0.612722	-0.0118021		-0.7273	-0.200203	0.656405		-0.891815	-1	1.00478		-0.226615	-0.00413655	0.834855		-0.040908	0.307945	0.548224		-0.455483	-0.862304	0.694185		-0.793445	-0.975129	0.99977
		-0.674094	-0.801252	0.465713		-0.423003	-0.273176	0.455468		0.980676	0.921931	-0.00871241		-0.987951	-0.80115	0.568247		-0.946063	-0.862046	0.999357		0.630316	0.606076	0.00429344		-0.723079	-0.193068	0.66019		-0.88474	-1	1.00474		-0.237756	-0.0253801	0.83687		-0.0346325	0.31329	0.54764		-0.439027	-0.856302	0.690084		-0.800162	-0.981392	0.999775
		-0.678624	-0.803444	0.467669		-0.437744	-0.291386	0.453714		0.9792	0.92287	-0.00866269		-0.988149	-0.796961	0.572041		-0.950346	-0.870239	0.999086		0.621727	0.598637	0.0208616		-0.718829	-0.185992	0.663761		-0.877544	-1	1.00468		-0.248877	-0.0466236	0.838667		-0.0284363	0.318571	0.54688		-0.422661	-0.850181	0.686607		-0.80678	-0.986827	0.999783
		-0.683127	-0.805577	0.469356		-0.452141	-0.309335	0.452153		0.977594	0.92381	-0.00883562		-0.988308	-0.792771	0.575721		-0.954343	-0.877977	0.998799		0.613049	0.591198	0.0375669		-0.714551	-0.178973	0.667107		-0.870238	-1	1.00462		-0.259974	-0.0678671	0.840412		-0.022202	0.323797	0.545947		-0.406395	-0.843981	0.68372		-0.813299	-0.988952	0.999795
		-0.687603	-0.807652	0.470767		-0.466198	-0.327152	0.450933		0.975858	0.924749	-0.00942544		-0.988428	-0.788581	0.579271		-0.958067	-0.885534	0.998504		0.604283	0.583759	0.054083		-0.710245	-0.172015	0.670218		-0.862833	-1	1.00455		-0.271047	-0.0890774	0.842291		-0.0159641	0.32897	0.544844		-0.390237	-0.837589	0.681373		-0.819717	-0.991076	0.999809
		-0.692052	-0.809669	0.471899		-0.479921	-0.344697	0.450188		0.973992	0.925399	-0.0105939		-0.988509	-0.78439	0.582674		-0.961526	-0.89282	0.998209		0.595429	0.57632	0.0701187		-0.70591	-0.165117	0.673082		-0.855336	-1	1.00449		-0.282094	-0.110155	0.844493		-0.00980312	0.334094	0.543572		-0.374196	-0.831124	0.679502		-0.826033	-0.993201	0.999824
		-0.696474	-0.811629	0.472754		-0.493315	-0.362033	0.450026		0.971995	0.925854	-0.0124498		-0.988551	-0.7802	0.585918		-0.964731	-0.89975	0.997921		0.58649	0.568881	0.085437		-0.701548	-0.158281	0.675688		-0.847759	-1	1.00444		-0.293112	-0.131232	0.847192		-0.00361609	0.339174	0.542137		-0.358278	-0.824548	0.678032		-0.832247	-0.995326	0.999841
		-0.700868	-0.813532	0.47334		-0.506385	-0.379229	0.450526		0.969869	0.92631	-0.0150378		-0.988554	-0.776009	0.588992		-0.967691	-0.906504	0.997644		0.577464	0.561442	0.099868		-0.697158	-0.151507	0.678022		-0.840111	-1	1.00441		-0.304102	-0.15231	0.850534		0.00261164	0.344212	0.540543		-0.342493	-0.817829	0.676887		-0.838357	-0.99745	0.999857
		-0.705234	-0.815379	0.473669		-0.519135	-0.396064	0.451736		0.967612	0.926766	-0.0183363		-0.988518	-0.771817	0.591886		-0.970415	-0.912908	0.997383		0.568354	0.553543	0.113316		-0.692741	-0.144797	0.680072		-0.832403	-1	1.00438		-0.31506	-0.173387	0.854613		0.00890301	0.349209	0.538797		-0.326847	-0.811041	0.675987		-0.844361	-0.999575	0.999874
		-0.709573	-0.81717	0.473759		-0.531572	-0.41275	0.453669		0.965226	0.927222	-0.02226		-0.988443	-0.767623	0.594588		-0.972912	-0.919053	0.997139		0.55916	0.545337	0.125757		-0.688296	-0.138151	0.681823		-0.824643	-1	1.00435		-0.325985	-0.194465	0.859474		0.0149423	0.354164	0.536906		-0.311348	-0.804115	0.675259		-0.850259	-1	0.99989
		-0.713884	-0.818905	0.473629		-0.5437	-0.429213	0.456308		0.96271	0.927678	-0.026663		-0.988329	-0.763427	0.597087		-0.97519	-0.925027	0.996915		0.549882	0.537132	0.137215		-0.683824	-0.131569	0.683262		-0.816839	-1	1.00432		-0.336875	-0.215542	0.865107		0.0212255	0.359078	0.53488		-0.296005	-0.797087	0.674634		-0.856049	-1	0.999905
		-0.718166	-0.820586	0.473298		-0.555524	-0.44537	0.459607		0.960064	0.927946	-0.0313466		-0.988176	-0.759226	0.599367		-0.977258	-0.930581	0.996712		0.540521	0.528926	0.147745		-0.679325	-0.125053	0.684375		-0.808997	-1	1.00428		-0.347729	-0.235954	0.871463		0.027582	0.363946	0.532727		-0.280822	-0.789993	0.674054		-0.86173	-1	0.999919
		-0.72242	-0.822216	0.472786		-0.567049	-0.461371	0.463499		0.95729	0.927466	-0.0360788		-0.987984	-0.755021	0.601412		-0.979125	-0.935969	0.99653		0.531079	0.52072	0.157398		-0.674799	-0.118602	0.685148		-0.801125	-1	1.00422		-0.358545	-0.2562	0.878463		0.0336602	0.368766	0.530459		-0.265803	-0.782731	0.673465		-0.867301	-1	0.999932
		-0.726646	-0.823799	0.47211		-0.578283	-0.477059	0.4679		0.954386	0.926986	-0.0406231		-0.987753	-0.750813	0.603199		-0.980799	-0.941112	0.996368		0.521555	0.512515	0.166214		-0.670247	-0.112216	0.685568		-0.793227	-1	1.00411		-0.369321	-0.276446	0.886014		0.040001	0.373534	0.528085		-0.25095	-0.775404	0.672822		-0.872761	-1	0.999944
		-0.730843	-0.825337	0.471287		-0.589231	-0.492508	0.472713		0.951353	0.926506	-0.044771		-0.987483	-0.746603	0.604704		-0.982289	-0.945934	0.996227		0.511951	0.504161	0.174216		-0.665668	-0.105895	0.685624		-0.78531	-1	1.00394		-0.380056	-0.296692	0.894019		0.0461694	0.378245	0.525616		-0.236268	-0.767979	0.672084		-0.878108	-1	0.999955
		-0.735011	-0.826835	0.470329		-0.599899	-0.507796	0.477839		0.948191	0.926026	-0.0483657		-0.987174	-0.742392	0.605902		-0.983602	-0.950598	0.996105		0.502268	0.495214	0.181426		-0.661063	-0.099639	0.685307		-0.777381	-1	1.00369		-0.390747	-0.316938	0.902373		0.0523233	0.382893	0.52306		-0.221758	-0.760425	0.671215		-0.883342	-1	0.999965
		-0.73915	-0.828296	0.469248		-0.610294	-0.522681	0.483178		0.944901	0.925545	-0.0513125		-0.986826	-0.738184	0.606763		-0.984746	-0.954951	0.996001		0.492508	0.486266	0.187877		-0.656432	-0.0934457	0.684609		-0.769446	-1	1.00334		-0.401394	-0.337184	0.910964		0.0586603	0.387474	0.520427		-0.207425	-0.752807	0.670185		-0.888461	-1	0.999974
		-0.74326	-0.829724	0.468051		-0.620421	-0.537402	0.488639		0.941482	0.925065	-0.0535754		-0.986439	-0.733981	0.607261		-0.985725	-0.959078	0.995915		0.482671	0.477319	0.193628		-0.651775	-0.0873132	0.683526		-0.76151	-0.997982	1.00286		-0.411994	-0.356903	0.919667		0.064746	0.39198	0.517727		-0.193272	-0.745064	0.668972		-0.893463	-1	0.999981
		-0.74734	-0.83112	0.466742		-0.630286	-0.551879	0.494142		0.937935	0.923649	-0.0551673		-0.986013	-0.729785	0.60737		-0.986548	-0.963054	0.995844		0.47276	0.468372	0.198777		-0.647092	-0.0812384	0.682057		-0.753579	-0.995184	1.00223		-0.422546	-0.375833	0.928344		0.0709054	0.396409	0.514968		-0.179301	-0.737231	0.667558		-0.898349	-1	0.999987
		-0.751391	-0.832487	0.465324		-0.639896	-0.566029	0.499625		0.93426	0.921998	-0.05614		-0.985548	-0.725602	0.607065		-0.987221	-0.966666	0.995789		0.462775	0.459425	0.203452		-0.642383	-0.0752189	0.680201		-0.745656	-0.991287	1.00141		-0.433048	-0.394763	0.936854		0.0771897	0.400757	0.512157		-0.165514	-0.729337	0.665931		-0.903116	-1	0.999993
		-0.755413	-0.833822	0.463794		-0.649256	-0.580016	0.505043		0.930457	0.920347	-0.0565751		-0.985044	-0.721434	0.606327		-0.98775	-0.970139	0.995746		0.452717	0.450477	0.207796		-0.63765	-0.069253	0.677963		-0.737743	-0.987116	1.00038		-0.443498	-0.413693	0.945061		0.083409	0.405023	0.509302		-0.151912	-0.721298	0.664085		-0.907763	-1	0.999997
		-0.759404	-0.835126	0.46215		-0.658374	-0.593677	0.510371		0.926526	0.918696	-0.0565788		-0.984502	-0.717284	0.60514		-0.988143	-0.9734	0.995717		0.44259	0.440982	0.211936		-0.632891	-0.063339	0.675349		-0.729845	-0.982764	0.999105		-0.453896	-0.432623	0.952851		0.0895341	0.409205	0.50641		-0.138493	-0.713203	0.662017		-0.91229	-1	1
		-0.763366	-0.836401	0.460384		-0.667253	-0.607094	0.515601		0.922468	0.917045	-0.0562806		-0.98392	-0.713154	0.603491		-0.988405	-0.976394	0.995699		0.432393	0.43135	0.215964		-0.628107	-0.0574763	0.672367		-0.721964	-0.977954	0.997554		-0.464238	-0.451553	0.960134		0.0956957	0.413304	0.503484		-0.125258	-0.705027	0.659724		-0.916694	-1	1
		-0.767297	-0.837648	0.458492		-0.675902	-0.620349	0.520737		0.918282	0.915394	-0.0558331		-0.9833	-0.709045	0.601375		-0.988542	-0.979255	0.995691		0.422128	0.421718	0.219925		-0.623298	-0.051663	0.66903		-0.714105	-0.97296	0.995698		-0.474524	-0.470483	0.96685		0.101971	0.41732	0.500531		-0.112208	-0.696746	0.657205		-0.920975	-1	1.00001
		-0.771198	-0.838869	0.456464		-0.684325	-0.633203	0.525797		0.913968	0.913277	-0.0554091		-0.982641	-0.704956	0.598792		-0.988559	-0.98186	0.995694		0.411796	0.412085	0.223811		-0.618465	-0.0458977	0.66535		-0.706271	-0.967689	0.993506		-0.484752	-0.487782	0.972964		0.108095	0.42126	0.497553		-0.0993407	-0.688416	0.654463		-0.925132	-1	1.00001
		-0.775069	-0.840069	0.454297		-0.692529	-0.645898	0.530803		0.909528	0.91046	-0.0551904		-0.981943	-0.700884	0.59575		-0.988461	-0.984281	0.995705		0.4014	0.402453	0.227583		-0.613607	-0.0401789	0.661346		-0.698464	-0.962048	0.990954		-0.494921	-0.505082	0.978459		0.11426	0.425127	0.494554		-0.0866579	-0.679991	0.651502		-0.929163	-1	1.00001
		-0.778909	-0.84125	0.451985		-0.700519	-0.658355	0.535777		0.90496	0.907643	-0.0553498		-0.981206	-0.696825	0.592263		-0.988252	-0.986579	0.995725		0.390939	0.392821	0.231181		-0.608725	-0.0345056	0.657036		-0.690687	-0.956222	0.988018		-0.505027	-0.522381	0.983337		0.120556	0.428928	0.491536		-0.0741589	-0.6715	0.648335		-0.933068	-1	1.00001
		-0.782718	-0.842414	0.449528		-0.708302	-0.6705	0.540735		0.900266	0.904826	-0.0560282		-0.98043	-0.692775	0.588353		-0.987937	-0.988584	0.995754		0.380417	0.382932	0.234547		-0.603819	-0.0288776	0.652443		-0.682942	-0.950023	0.984683		-0.515071	-0.53968	0.987613		0.126652	0.432673	0.4885		-0.0618425	-0.662966	0.644977		-0.936845	-1	1.00001
		-0.786497	-0.843563	0.446927		-0.715884	-0.682491	0.545686		0.895445	0.902008	-0.0573132		-0.979616	-0.688728	0.584048		-0.987522	-0.990476	0.995791		0.369833	0.37266	0.237649		-0.598889	-0.0232948	0.647591		-0.675229	-0.943543	0.980941		-0.52505	-0.55698	0.991311		0.132755	0.436369	0.485448		-0.0497068	-0.654335	0.641453		-0.940494	-1	1.00001
		-0.790244	-0.844701	0.444186		-0.723268	-0.694174	0.550628		0.890498	0.899191	-0.0592194		-0.978763	-0.684681	0.579381		-0.987009	-0.992198	0.995836		0.359189	0.362388	0.240493		-0.593936	-0.0177581	0.642505		-0.66755	-0.936875	0.976791		-0.534963	-0.574279	0.994466		0.138968	0.440027	0.482382		-0.0377498	-0.645669	0.637789		-0.944015	-1	1.00001
		-0.79396	-0.845827	0.441313		-0.730462	-0.705628	0.55555		0.885424	0.896374	-0.061675		-0.977872	-0.68063	0.574389		-0.986405	-0.9937	0.995889		0.348488	0.352116	0.243133		-0.588959	-0.0122689	0.637213		-0.659906	-0.929738	0.972245		-0.544808	-0.590494	0.997115		0.145021	0.443655	0.479305		-0.0259696	-0.636952	0.634011		-0.947406	-1	1.00001
		-0.797645	-0.846942	0.438318		-0.737469	-0.71693	0.560427		0.880225	0.892636	-0.0645201		-0.976942	-0.676573	0.56911		-0.985713	-0.995093	0.995949		0.337729	0.341844	0.245667		-0.583958	-0.00682881	0.631741		-0.6523	-0.922411	0.967329		-0.554583	-0.605986	0.9993		0.151186	0.447262	0.476219		-0.0143643	-0.628174	0.630141		-0.950668	-1	1.00001
		-0.801299	-0.848045	0.435213		-0.744297	-0.727852	0.565224		0.874899	0.888899	-0.0675217		-0.975973	-0.672508	0.563587		-0.984937	-0.99627	0.996018		0.326915	0.331572	0.248221		-0.578935	-0.00143891	0.626115		-0.644731	-0.914801	0.962079		-0.564286	-0.621478	1.00107		0.157508	0.450856	0.473127		-0.00293184	-0.619366	0.626195		-0.9538	-1	1.00001
		-0.80492	-0.849135	0.432013		-0.750948	-0.73862	0.569898		0.869447	0.885161	-0.0704059		-0.974966	-0.668432	0.557858		-0.984078	-0.997286	0.996094		0.316047	0.321299	0.250935		-0.573889	0.00390124	0.620359		-0.637201	-0.906811	0.956538		-0.573917	-0.63697	1.00246		0.163523	0.454442	0.47003		0.00832963	-0.610505	0.62218		-0.956801	-1	1.00001
		-0.80851	-0.850209	0.42873		-0.75743	-0.74916	0.574396		0.86387	0.881423	-0.0729018		-0.97392	-0.664344	0.551963		-0.983142	-0.998196	0.996178		0.305127	0.310361	0.253956		-0.56882	0.00919199	0.614497		-0.629712	-0.898632	0.950761		-0.583473	-0.652463	1.00351		0.169576	0.458027	0.466929		0.0194221	-0.601608	0.618094		-0.95967	-1	1.00001
		-0.812068	-0.851264	0.425377		-0.763747	-0.759391	0.578662		0.858168	0.877686	-0.074783		-0.972836	-0.660239	0.545942		-0.98213	-0.998838	0.996269		0.294155	0.299423	0.257431		-0.563729	0.0144343	0.608549		-0.622262	-0.890072	0.944805		-0.592953	-0.667955	1.00428		0.175788	0.461619	0.463823		0.0303482	-0.592688	0.613929		-0.962407	-1	1.00001
		-0.815594	-0.852299	0.421969		-0.769904	-0.769467	0.582638		0.85234	0.873948	-0.0758946		-0.971714	-0.656117	0.539827		-0.981046	-0.999373	0.996367		0.283133	0.288484	0.261507		-0.558616	0.0196292	0.602537		-0.614853	-0.881227	0.938731		-0.602355	-0.683072	1.00481		0.181811	0.465226	0.460712		0.0411107	-0.583721	0.609671		-0.965012	-1	1.00001
		-0.819088	-0.853307	0.418516		-0.775906	-0.779233	0.586271		0.846387	0.86987	-0.0761608		-0.970553	-0.651976	0.533651		-0.979893	-0.999749	0.996472		0.272062	0.277546	0.266334		-0.55348	0.0247778	0.596481		-0.607483	-0.872191	0.932602		-0.611677	-0.696691	1.00512		0.18797	0.468853	0.457594		0.0517125	-0.574739	0.605306		-0.967483	-1	1
		-0.822549	-0.854287	0.41503		-0.781756	-0.788765	0.589517		0.840309	0.865564	-0.0755752		-0.969353	-0.647814	0.52744		-0.978674	-0.999912	0.996583		0.260945	0.266607	0.272072		-0.548323	0.0298833	0.5904		-0.600154	-0.862678	0.92648		-0.620918	-0.710309	1.00525		0.194041	0.472507	0.454467		0.0621566	-0.565735	0.60082		-0.969821	-1	1
		-0.825978	-0.855239	0.411519		-0.78746	-0.798142	0.59234		0.834109	0.861259	-0.0741825		-0.968116	-0.643631	0.521217		-0.977392	-0.999969	0.996697		0.249781	0.255669	0.278894		-0.543144	0.0349489	0.58431		-0.592864	-0.852974	0.920426		-0.630076	-0.723927	1.00525		0.200006	0.476193	0.451329		0.0724457	-0.556708	0.596195		-0.972025	-1	1
		-0.829375	-0.856159	0.40799		-0.79302	-0.807129	0.594718		0.827787	0.856954	-0.0720608		-0.96684	-0.639426	0.514997		-0.976049	-0.999815	0.996815		0.238573	0.244305	0.286987		-0.537943	0.0399774	0.578229		-0.585615	-0.842984	0.914498		-0.63915	-0.737546	1.00512		0.206261	0.479916	0.448179		0.0825827	-0.547671	0.591417		-0.974093	-1	1
		-0.832738	-0.857048	0.404445		-0.798443	-0.815959	0.596646		0.821343	0.852648	-0.069311		-0.965526	-0.635198	0.508794		-0.974647	-0.999504	0.996933		0.227322	0.232657	0.296526		-0.532722	0.0449709	0.572171		-0.578406	-0.832613	0.908748		-0.648137	-0.751164	1.00491		0.21232	0.483678	0.445019		0.0925706	-0.538616	0.586471		-0.976026	-1	1
		-0.836069	-0.857902	0.400885		-0.803732	-0.824556	0.598135		0.814779	0.848343	-0.0660533		-0.964174	-0.630946	0.502615		-0.973187	-0.999087	0.997049		0.21603	0.221009	0.307651		-0.527479	0.0499302	0.566148		-0.571237	-0.822052	0.903222		-0.657037	-0.764783	1.00463		0.218272	0.487479	0.441847		0.102412	-0.529549	0.581342		-0.977823	-1	1
		-0.839367	-0.858721	0.397307		-0.808892	-0.832841	0.599215		0.808096	0.843977	-0.0624291		-0.962784	-0.626671	0.496464		-0.971673	-0.998412	0.997159		0.204697	0.209361	0.320434		-0.522215	0.0548556	0.560169		-0.564107	-0.811111	0.897957		-0.665847	-0.776916	1.00431		0.224414	0.491319	0.438666		0.11211	-0.520476	0.576017		-0.979483	-1	1
		-0.842631	-0.859508	0.393702		-0.813925	-0.840971	0.59993		0.801294	0.83937	-0.0586036		-0.961356	-0.622373	0.490342		-0.970104	-0.997634	0.99726		0.193325	0.197714	0.334861		-0.516931	0.0597467	0.554242		-0.557016	-0.799887	0.892979		-0.674566	-0.788679	1.00395		0.230515	0.495197	0.435478		0.121669	-0.511385	0.570482		-0.981006	-1	1
		-0.845863	-0.860264	0.390061		-0.818837	-0.848791	0.600336		0.794376	0.834763	-0.0547673		-0.95989	-0.618055	0.484245		-0.968485	-0.996702	0.997347		0.181916	0.186066	0.350835		-0.511627	0.0646034	0.548375		-0.549962	-0.788472	0.888302		-0.683192	-0.800441	1.00358		0.236528	0.499108	0.432283		0.13109	-0.502288	0.564723		-0.982391	-1	1
		-0.849061	-0.860992	0.386376		-0.82363	-0.85638	0.600497		0.78734	0.830156	-0.0511325		-0.958386	-0.613715	0.478168		-0.966816	-0.995568	0.997414		0.170471	0.174279	0.368191		-0.506302	0.0694262	0.542571		-0.542945	-0.776588	0.883926		-0.691723	-0.812203	1.0032		0.242504	0.503052	0.429084		0.140377	-0.49318	0.558731		-0.983638	-1	1
		-0.852225	-0.861696	0.382639		-0.828307	-0.863815	0.600481		0.780189	0.82555	-0.0479226		-0.956845	-0.609356	0.472106		-0.9651	-0.994334	0.997455		0.158991	0.161938	0.386726		-0.500957	0.0742154	0.536833		-0.535966	-0.764517	0.879841		-0.700159	-0.823966	1.00283		0.248527	0.507021	0.42588		0.149533	-0.484058	0.5525		-0.984746	-1	1
		-0.855356	-0.862379	0.378844		-0.832872	-0.870867	0.600357		0.772924	0.820943	-0.0453523		-0.955265	-0.604976	0.466055		-0.963337	-0.992902	0.997462		0.14748	0.149598	0.406224		-0.495592	0.0789728	0.531161		-0.529022	-0.752166	0.876027		-0.708497	-0.835728	1.00246		0.254538	0.511012	0.42267		0.158562	-0.474929	0.546032		-0.985714	-1	1
		-0.858453	-0.863042	0.37499		-0.837328	-0.877767	0.60019		0.765545	0.816336	-0.0436033		-0.953648	-0.600575	0.460011		-0.961528	-0.991323	0.997427		0.135937	0.137257	0.426481		-0.490208	0.0837001	0.525556		-0.522113	-0.739444	0.872456		-0.716735	-0.84678	1.00212		0.260596	0.515016	0.419452		0.167466	-0.465785	0.539336		-0.986542	-1	1
		-0.861516	-0.863686	0.371075		-0.84168	-0.88444	0.600044		0.758054	0.811606	-0.0427986		-0.951993	-0.596151	0.453971		-0.959676	-0.989648	0.997342		0.124365	0.124916	0.447316		-0.484805	0.0883991	0.520014		-0.515238	-0.72654	0.869099		-0.724873	-0.856766	1.0018		0.266586	0.519027	0.416226		0.176248	-0.456629	0.532419		-0.987229	-1	1
		-0.864545	-0.864313	0.367104		-0.845929	-0.890813	0.599978		0.750451	0.806845	-0.0429787		-0.950301	-0.591705	0.447934		-0.95778	-0.987734	0.997195		0.112767	0.112575	0.468575		-0.479382	0.0930723	0.51453		-0.508397	-0.713269	0.865921		-0.73291	-0.866752	1.0015		0.272395	0.523036	0.412989		0.184912	-0.447463	0.525287		-0.987774	-1	0.999999
		-0.86754	-0.864923	0.36308		-0.85008	-0.897037	0.600049		0.742738	0.802084	-0.0440896		-0.948571	-0.587234	0.441898		-0.955842	-0.985728	0.996975		0.101143	0.100234	0.490127		-0.473941	0.097722	0.509098		-0.501589	-0.699729	0.862889		-0.740843	-0.876737	1.00123		0.278449	0.527035	0.409742		0.193461	-0.438272	0.517936		-0.988178	-1	0.999999
		-0.870501	-0.865517	0.359011		-0.854134	-0.902964	0.600312		0.734914	0.797323	-0.0459884		-0.946803	-0.582736	0.435865		-0.953864	-0.983583	0.996672		0.089496	0.0873523	0.511859		-0.468481	0.102351	0.503707		-0.494811	-0.686008	0.859973		-0.748672	-0.886723	1.00098		0.284573	0.531018	0.406484		0.201896	-0.429068	0.510352		-0.98844	-1	0.999999
		-0.873427	-0.866096	0.354903		-0.858094	-0.908671	0.60082		0.726982	0.792562	-0.0484679		-0.944998	-0.578208	0.429839		-0.951846	-0.981258	0.996272		0.0778272	0.0743359	0.533665		-0.463002	0.106963	0.498348		-0.488065	-0.671845	0.857145		-0.756396	-0.896709	1.00076		0.290378	0.534974	0.403216		0.210222	-0.419844	0.502514		-0.988558	-1	1
		-0.876319	-0.866659	0.350763		-0.861962	-0.914231	0.601629		0.718943	0.787801	-0.0512932		-0.943156	-0.573648	0.423823		-0.949789	-0.978844	0.995763		0.0661385	0.0613196	0.55544		-0.457505	0.111558	0.493011		-0.481348	-0.657508	0.854381		-0.764014	-0.906695	1.00057		0.296237	0.538895	0.399937		0.218441	-0.410591	0.494386		-0.988532	-1	1
		-0.879176	-0.867202	0.346599		-0.865742	-0.919431	0.602797		0.710796	0.783017	-0.0542406		-0.941277	-0.569054	0.417824		-0.947694	-0.976256	0.995132		0.0544318	0.0483032	0.577066		-0.45199	0.116139	0.487686		-0.47466	-0.642911	0.851665		-0.771524	-0.915026	1.00041		0.302242	0.542773	0.39665		0.226557	-0.401321	0.485931		-0.988363	-1	1
		-0.881999	-0.867721	0.342417		-0.869436	-0.924488	0.604386		0.702544	0.778197	-0.0571242		-0.93936	-0.564425	0.411846		-0.945562	-0.973542	0.994365		0.0427088	0.0352869	0.598417		-0.446457	0.120707	0.482364		-0.467999	-0.627976	0.848983		-0.778926	-0.923356	1.00026		0.3081	0.546604	0.393353		0.234571	-0.392018	0.477107		-0.988048	-1	1
		-0.884787	-0.868213	0.338222		-0.873046	-0.929332	0.606462		0.694187	0.773378	-0.0598056		-0.937407	-0.559762	0.405895		-0.943393	-0.970745	0.993451		0.0309715	0.0222705	0.619364		-0.440906	0.125265	0.477039		-0.461365	-0.612874	0.846325		-0.786217	-0.931687	1.00014		0.313979	0.550382	0.390047		0.242487	-0.38269	0.467874		-0.987588	-1	1
		-0.887539	-0.868672	0.334018		-0.876575	-0.933896	0.609089		0.685726	0.768558	-0.0621904		-0.935416	-0.555067	0.399977		-0.941188	-0.967745	0.992378		0.0192214	0.00896186	0.639802		-0.435338	0.129816	0.471707		-0.454757	-0.597442	0.843685		-0.793397	-0.940018	1.00005		0.319966	0.554105	0.386733		0.250307	-0.373344	0.458199		-0.986983	-1	1
		-0.890257	-0.869096	0.329808		-0.880024	-0.938321	0.612331		0.677162	0.763738	-0.0642163		-0.933389	-0.550338	0.394093		-0.938947	-0.964669	0.991136		0.0074606	-0.00478526	0.659665		-0.429753	0.134363	0.466365		-0.448173	-0.581772	0.84106		-0.800465	-0.948349	0.999965		0.325798	0.557771	0.383409		0.258035	-0.363955	0.44806		-0.986233	-1	1
		-0.89294	-0.869482	0.325591		-0.883396	-0.942471	0.616249		0.668496	0.758919	-0.0658434		-0.931324	-0.545578	0.388247		-0.936672	-0.961477	0.989718		-0.00430926	-0.0185324	0.678937		-0.424151	0.13891	0.461013		-0.441613	-0.565943	0.838449		-0.80742	-0.95668	0.999902		0.331684	0.561379	0.380076		0.265672	-0.354551	0.437452		-0.985339	-1	1
		-0.895587	-0.869831	0.321364		-0.886693	-0.946418	0.620902		0.659728	0.754099	-0.0670502		-0.929223	-0.540787	0.38244		-0.934362	-0.958137	0.988118		-0.0160863	-0.0322795	0.697635		-0.418532	0.143457	0.455651		-0.435076	-0.54973	0.835851		-0.81426	-0.963761	0.999853		0.337609	0.564928	0.376736		0.273221	-0.345124	0.426382		-0.9843	-1	1
		-0.898199	-0.870143	0.317123		-0.889916	-0.95023	0.626343		0.650861	0.749252	-0.0678368		-0.927085	-0.535964	0.376671		-0.932018	-0.954723	0.986333		-0.0278688	-0.0460266	0.715787		-0.412897	0.148009	0.450281		-0.428561	-0.53337	0.833264		-0.820984	-0.970009	0.999817		0.343379	0.56842	0.373387		0.280685	-0.335671	0.41487		-0.983117	-1	1
		-0.900776	-0.870419	0.312857		-0.893068	-0.953711	0.632618		0.641895	0.744405	-0.0682295		-0.924911	-0.53111	0.370936		-0.929641	-0.951163	0.984363		-0.0396549	-0.0597737	0.733406		-0.407245	0.152569	0.444904		-0.422066	-0.516791	0.830685		-0.827591	-0.976257	0.999793		0.349173	0.571854	0.370033		0.288066	-0.326205	0.402947		-0.981791	-1	1
		-0.903317	-0.870663	0.308556		-0.896149	-0.957063	0.639765		0.632831	0.739558	-0.0682842		-0.9227	-0.526225	0.365234		-0.92723	-0.947496	0.982207		-0.0514429	-0.0735209	0.750483		-0.401578	0.157137	0.439525		-0.415591	-0.499934	0.828109		-0.83408	-0.982505	0.999778		0.354871	0.575232	0.366672		0.295366	-0.31672	0.390655		-0.980321	-1	1
		-0.905822	-0.870877	0.304206		-0.899162	-0.96022	0.64781		0.623669	0.734711	-0.0680909		-0.920453	-0.52131	0.35956		-0.924787	-0.943757	0.979867		-0.0632308	-0.0880485	0.766981		-0.395894	0.161718	0.434145		-0.409135	-0.482941	0.825524		-0.840449	-0.988753	0.999771		0.360718	0.578556	0.363306		0.302589	-0.307226	0.378049		-0.978708	-1	1
		-0.908292	-0.871061	0.299796		-0.902109	-0.963123	0.656759		0.614412	0.729864	-0.0677744		-0.918169	-0.516365	0.353911		-0.922311	-0.939842	0.977345		-0.0750169	-0.102576	0.782849		-0.390195	0.166312	0.428768		-0.402697	-0.465686	0.822917		-0.846698	-0.995001	0.99977		0.366641	0.581829	0.359936		0.309736	-0.297724	0.365197		-0.976952	-1	1
		-0.910725	-0.871217	0.295319		-0.904991	-0.9659	0.666593		0.605059	0.725017	-0.067488		-0.915849	-0.511395	0.348283		-0.919802	-0.935856	0.974645		-0.0867995	-0.117104	0.798025		-0.38448	0.170919	0.423398		-0.396277	-0.448248	0.820269		-0.852826	-1	0.999775		0.372262	0.585054	0.356561		0.316808	-0.288215	0.352182		-0.975054	-1	1
		-0.913123	-0.871346	0.29077		-0.907809	-0.968429	0.677272		0.595612	0.720091	-0.0673955		-0.913493	-0.506401	0.342674		-0.917262	-0.931767	0.971771		-0.0985766	-0.131632	0.812446		-0.37875	0.175538	0.418038		-0.389872	-0.430688	0.81756		-0.85883	-1	0.999783		0.378	0.588235	0.353182		0.32381	-0.278707	0.3391		-0.973013	-1	1.00001
		-0.915485	-0.871449	0.286149		-0.910565	-0.970776	0.688726		0.586072	0.715112	-0.0676442		-0.911101	-0.501389	0.337085		-0.91469	-0.927541	0.968728		-0.110347	-0.146159	0.826057		-0.373006	0.180165	0.412693		-0.383483	-0.412848	0.814767		-0.864711	-1	0.999795		0.383793	0.591377	0.349797		0.330741	-0.269199	0.326055		-0.97083	-1	1.00001
		-0.91781	-0.871527	0.281463		-0.91326	-0.973001	0.700858		0.576441	0.710133	-0.0683366		-0.908673	-0.496363	0.331514		-0.912087	-0.923247	0.965523		-0.122107	-0.160687	0.838821		-0.367246	0.184798	0.407365		-0.377108	-0.394906	0.811861		-0.870466	-1	0.999809		0.389462	0.594486	0.346408		0.337605	-0.259698	0.313152		-0.968505	-1	1.00001
		-0.9201	-0.871578	0.276721		-0.915894	-0.974931	0.713546		0.566721	0.705155	-0.0695064		-0.906209	-0.491326	0.325964		-0.909452	-0.918815	0.962162		-0.133858	-0.175604	0.85072		-0.361472	0.189432	0.402059		-0.370747	-0.376813	0.808815		-0.876095	-1	0.999824		0.395275	0.597568	0.343015		0.344403	-0.250202	0.300491		-0.966038	-1	1.00001
		-0.922353	-0.871601	0.271937		-0.918471	-0.976745	0.726649		0.556913	0.700176	-0.0711051		-0.903709	-0.486286	0.320438		-0.906786	-0.914275	0.958651		-0.145595	-0.19078	0.861753		-0.355684	0.194065	0.396778		-0.364399	-0.358539	0.805593		-0.881596	-1	0.999841		0.401003	0.60063	0.339621		0.351137	-0.240719	0.288161		-0.96343	-1	1.00001
		-0.924569	-0.871595	0.267129		-0.92099	-0.978386	0.740012		0.54702	0.695197	-0.0730024		-0.901173	-0.481247	0.31494		-0.904088	-0.909664	0.954992		-0.157318	-0.205957	0.871933		-0.349882	0.198692	0.391522		-0.358062	-0.340182	0.802156		-0.886968	-1	0.999857		0.40659	0.603678	0.336225		0.35781	-0.231248	0.276235		-0.960681	-1	1.00001
		-0.92675	-0.871557	0.262316		-0.923452	-0.979803	0.753479		0.537041	0.690134	-0.0749975		-0.898602	-0.476214	0.309476		-0.90136	-0.904862	0.951188		-0.169025	-0.221134	0.881278		-0.344065	0.20331	0.386294		-0.351737	-0.321668	0.798461		-0.892211	-1	0.999874		0.412298	0.606716	0.332829		0.364423	-0.221784	0.26477		-0.957792	-1	1.00001
		-0.928893	-0.871483	0.257517		-0.92586	-0.981108	0.766899		0.52698	0.684732	-0.0768423		-0.895996	-0.471191	0.304053		-0.898601	-0.89998	0.947234		-0.180714	-0.23631	0.889806		-0.338236	0.207919	0.381096		-0.345423	-0.303054	0.794461		-0.897323	-1	0.99989		0.417956	0.60975	0.329432		0.370977	-0.212344	0.253807		-0.954762	-1	1.00001
		-0.931	-0.871373	0.25275		-0.928213	-0.982195	0.780128		0.516838	0.67933	-0.0782688		-0.893354	-0.46618	0.298675		-0.895811	-0.894976	0.943119		-0.192383	-0.251487	0.897535		-0.332393	0.212518	0.37593		-0.339118	-0.284373	0.790107		-0.902302	-1	0.999905		0.423497	0.612785	0.326033		0.377474	-0.202916	0.24337		-0.951591	-1	1.00001
		-0.93307	-0.871223	0.248032		-0.930513	-0.983122	0.793041		0.506616	0.673928	-0.0790143		-0.890677	-0.461181	0.293349		-0.892991	-0.889802	0.938826		-0.20403	-0.266718	0.904491		-0.326537	0.217108	0.370799		-0.332823	-0.265554	0.785354		-0.907148	-1	0.999919		0.429166	0.615824	0.322632		0.383916	-0.193504	0.233476		-0.948281	-1	1.00001
		-0.935103	-0.871036	0.243379		-0.932761	-0.983943	0.805525		0.496316	0.668526	-0.0788356		-0.887964	-0.456196	0.288077		-0.89014	-0.88454	0.934332		-0.215654	-0.282169	0.910719		-0.320667	0.22169	0.365703		-0.326536	-0.246692	0.780163		-0.911859	-1	0.999932		0.434843	0.618871	0.319226		0.390303	-0.18412	0.224128		-0.944831	-1	1.00001
		-0.9371	-0.870812	0.238803		-0.934956	-0.984506	0.817491		0.48594	0.663124	-0.0775134		-0.885217	-0.451223	0.282861		-0.887259	-0.879101	0.929611		-0.227253	-0.297619	0.916295		-0.314786	0.226266	0.360644		-0.320257	-0.227767	0.774501		-0.916434	-1	0.999944		0.440327	0.621931	0.315814		0.396639	-0.174749	0.215323		-0.941241	-1	1
		-0.939059	-0.870552	0.234312		-0.937101	-0.984969	0.828869		0.47549	0.657722	-0.0748481		-0.882435	-0.446265	0.277699		-0.884347	-0.873523	0.924634		-0.238824	-0.31307	0.921332		-0.308892	0.230835	0.355623		-0.313985	-0.208783	0.768343		-0.920872	-1	0.999955		0.445864	0.625006	0.312395		0.402923	-0.16541	0.20705		-0.937513	-1	1
		-0.940981	-0.870258	0.229912		-0.939195	-0.985282	0.839611		0.464966	0.651638	-0.0706591		-0.879618	-0.441318	0.272589		-0.881405	-0.867852	0.919372		-0.250367	-0.32852	0.925963		-0.302985	0.235399	0.350642		-0.30772	-0.189778	0.761666		-0.925174	-1	0.999965		0.451428	0.628099	0.308969		0.409159	-0.156099	0.199291		-0.933645	-1	1
		-0.942866	-0.869934	0.225605		-0.94124	-0.985398	0.849697		0.454371	0.645382	-0.0647895		-0.876766	-0.436383	0.267526		-0.878432	-0.861942	0.913799		-0.261879	-0.343971	0.93033		-0.297067	0.239959	0.345701		-0.301461	-0.170745	0.754448		-0.929337	-1	0.999974		0.456849	0.631214	0.305534		0.415346	-0.146807	0.192031		-0.929639	-1	0.999998
		-0.944714	-0.869579	0.221386		-0.943237	-0.985416	0.859127		0.443706	0.639127	-0.0571182		-0.873879	-0.431458	0.262506		-0.875429	-0.855933	0.90789		-0.273358	-0.359421	0.934558		-0.291137	0.244515	0.340802		-0.295208	-0.15171	0.746661		-0.933363	-1	0.999981		0.46239	0.634351	0.302091		0.421486	-0.137568	0.185252		-0.925495	-1	0.999995
		-0.946525	-0.869197	0.217245		-0.945185	-0.98524	0.867927		0.432973	0.632871	-0.0475723		-0.870958	-0.426541	0.257523		-0.872396	-0.849773	0.901623		-0.284803	-0.374698	0.938741		-0.285195	0.249067	0.335946		-0.288959	-0.132675	0.738275		-0.93725	-1	0.999987		0.467966	0.637513	0.298641		0.42758	-0.128351	0.178938		-0.921212	-1	0.999991
		-0.948298	-0.868789	0.21317		-0.947086	-0.984918	0.876142		0.422173	0.626616	-0.0361368		-0.868003	-0.42163	0.252573		-0.869333	-0.843405	0.89498		-0.296212	-0.389932	0.942938		-0.279243	0.253617	0.331136		-0.282716	-0.113672	0.729251		-0.940999	-1	0.999993		0.473345	0.640698	0.295185		0.433629	-0.119167	0.173078		-0.916792	-1	0.999986
		-0.950034	-0.868353	0.209144		-0.94894	-0.984499	0.883834		0.411309	0.62036	-0.0228602		-0.865013	-0.416722	0.247651		-0.866239	-0.83693	0.887949		-0.307583	-0.405166	0.947162		-0.273279	0.258167	0.326375		-0.276476	-0.0946932	0.719549		-0.944608	-1	0.999997		0.478776	0.643909	0.291725		0.439634	-0.110025	0.167668		-0.912234	-1	0.999981
		-0.951732	-0.867892	0.205147		-0.950747	-0.983838	0.891076		0.400381	0.613595	-0.00785941		-0.861989	-0.411815	0.242756		-0.863115	-0.830236	0.880523		-0.318913	-0.420399	0.951394		-0.267304	0.262717	0.321666		-0.27024	-0.0757511	0.709128		-0.948078	-1	1		0.484321	0.647145	0.288262		0.445597	-0.100904	0.162708		-0.907539	-1	0.999974
		-0.953393	-0.867405	0.201163		-0.952508	-0.983079	0.897945		0.389392	0.606065	0.00867944		-0.858931	-0.406908	0.237886		-0.859962	-0.823369	0.872704		-0.330203	-0.435633	0.955581		-0.261319	0.26727	0.317013		-0.264007	-0.0568801	0.697951		-0.951408	-1	1		0.489716	0.650407	0.284799		0.451518	-0.0918244	0.158208		-0.902707	-1	0.999967
		-0.955016	-0.866892	0.197176		-0.954224	-0.982174	0.904515		0.378343	0.598535	0.0265064		-0.85584	-0.401997	0.233043		-0.856778	-0.816387	0.864501		-0.341448	-0.450867	0.95966		-0.255324	0.271825	0.312419		-0.257778	-0.0380492	0.685988		-0.954598	-1	1.00001		0.495022	0.653696	0.281338		0.457398	-0.0827763	0.154177		-0.897739	-1	0.999959
		-0.956601	-0.866351	0.193175		-0.955895	-0.981076	0.910851		0.367235	0.591005	0.0453168		-0.852714	-0.397081	0.22823		-0.853563	-0.809107	0.855933		-0.352649	-0.465838	0.963568		-0.249318	0.276384	0.307885		-0.25155	-0.0193077	0.67322		-0.957647	-1	1.00001		0.50037	0.65701	0.277883		0.463239	-0.0737493	0.150628		-0.892634	-1	0.99995
		-0.958149	-0.86578	0.189151		-0.957521	-0.97988	0.917004		0.35607	0.583475	0.0647643		-0.849555	-0.39216	0.223449		-0.850319	-0.801703	0.847027		-0.363802	-0.480415	0.967255		-0.243303	0.280948	0.303414		-0.245325	-0.000644052	0.659638		-0.960555	-1	1.00001		0.505708	0.660348	0.27444		0.469041	-0.0647803	0.147564		-0.887396	-1	0.99994
		-0.959659	-0.865176	0.185097		-0.959103	-0.978489	0.923011		0.344851	0.575945	0.0844793		-0.846362	-0.387233	0.218708		-0.847045	-0.794114	0.837818		-0.374906	-0.494991	0.970681		-0.237278	0.285517	0.299007		-0.239101	0.0179676	0.64524		-0.963322	-1	1.00001		0.511111	0.663705	0.271013		0.474804	-0.055838	0.144982		-0.882024	-1	0.99993
		-0.961131	-0.864537	0.181012		-0.960641	-0.976953	0.928895		0.333578	0.568416	0.104099		-0.843136	-0.382298	0.214013		-0.843741	-0.786271	0.828343		-0.385959	-0.509568	0.973823		-0.231243	0.290092	0.294662		-0.23288	0.0364325	0.630029		-0.965948	-1	1.00001		0.51646	0.667079	0.26761		0.480531	-0.0469359	0.142861		-0.87652	-1	0.999918
		-0.962565	-0.863861	0.176896		-0.962135	-0.97532	0.934664		0.322253	0.55931	0.123307		-0.839877	-0.377355	0.209369		-0.840406	-0.7783	0.818636		-0.39696	-0.524145	0.976669		-0.2252	0.294674	0.290378		-0.226659	0.0548319	0.61401		-0.968431	-1	1.00001		0.521705	0.670461	0.264235		0.48622	-0.0380969	0.141173		-0.870885	-1	0.999907
		-0.963961	-0.863146	0.172751		-0.963587	-0.973445	0.940319		0.310878	0.550205	0.141878		-0.836584	-0.372404	0.204784		-0.837042	-0.770068	0.808728		-0.407907	-0.538722	0.979213		-0.219148	0.299262	0.286152		-0.220439	0.0731329	0.597196		-0.970772	-1	1.00001		0.526983	0.673847	0.260892		0.491873	-0.0292921	0.13988		-0.86512	-1	0.999894
		-0.965319	-0.862389	0.168581		-0.964995	-0.971473	0.945849		0.299454	0.5411	0.1597		-0.833259	-0.367447	0.200263		-0.833648	-0.761638	0.798639		-0.418797	-0.553299	0.98146		-0.213086	0.303856	0.28198		-0.21422	0.0912877	0.579607		-0.97297	-1	1.00001		0.532196	0.67723	0.257585		0.497491	-0.0205611	0.138946		-0.859226	-1	0.999882
		-0.966638	-0.861588	0.164389		-0.96636	-0.969355	0.951239		0.287983	0.531994	0.176784		-0.8299	-0.362483	0.195808		-0.830223	-0.753075	0.788377		-0.429629	-0.5669	0.983419		-0.207017	0.308456	0.277858		-0.208002	0.109365	0.561273		-0.975025	-1	1.00001		0.537403	0.680601	0.254316		0.503074	-0.0118928	0.138338		-0.853204	-1	0.99987
		-0.96792	-0.860744	0.160183		-0.967684	-0.967044	0.956465		0.276467	0.522889	0.193241		-0.826509	-0.357517	0.191419		-0.826769	-0.744177	0.77794		-0.440401	-0.580501	0.985104		-0.200939	0.313062	0.273781		-0.201784	0.127277	0.542244		-0.976936	-1	1.00001		0.542656	0.683956	0.251085		0.508624	-0.00326619	0.138024		-0.847056	-1	0.999858
		-0.969163	-0.859856	0.155967		-0.968965	-0.964637	0.961499		0.264908	0.513784	0.209257		-0.823085	-0.35255	0.187094		-0.823285	-0.735144	0.767311		-0.451111	-0.594102	0.986531		-0.194854	0.317676	0.269743		-0.195566	0.14505	0.522583		-0.978704	-1	1.00001		0.54783	0.687289	0.247892		0.514139	0.00524562	0.137981		-0.840782	-1	0.999848
		-0.970369	-0.858923	0.151748		-0.970204	-0.962037	0.966312		0.253306	0.503656	0.225069		-0.819629	-0.347584	0.182827		-0.819771	-0.725907	0.756462		-0.461758	-0.607703	0.987722		-0.188761	0.322296	0.265739		-0.189347	0.162731	0.502372		-0.980327	-1	1.00001		0.55295	0.690594	0.244736		0.519622	0.0137076	0.138189		-0.834384	-1	0.999839
		-0.971536	-0.857946	0.147533		-0.971401	-0.959293	0.970873		0.241664	0.492847	0.240932		-0.81614	-0.34262	0.178613		-0.816228	-0.716398	0.745353		-0.472339	-0.621304	0.988696		-0.18266	0.326925	0.261764		-0.183129	0.180153	0.481711		-0.981806	-1	1.00001		0.558141	0.693869	0.241614		0.525072	0.0220948	0.138631		-0.827863	-1	0.999832
		-0.972664	-0.856923	0.143326		-0.972557	-0.956452	0.975151		0.229984	0.482037	0.257099		-0.812619	-0.337658	0.174444		-0.812654	-0.706753	0.733934		-0.482854	-0.634906	0.989475		-0.176552	0.331561	0.257816		-0.176911	0.197462	0.460718		-0.983139	-1	1.00001		0.5633	0.697108	0.238523		0.530489	0.0303742	0.139299		-0.82122	-1	0.999829
		-0.973754	-0.855855	0.139129		-0.973672	-0.953372	0.979121		0.218268	0.471228	0.27379		-0.809066	-0.332699	0.170312		-0.809051	-0.696836	0.722149		-0.493299	-0.6478	0.990081		-0.170437	0.336205	0.253892		-0.170691	0.214602	0.43952		-0.984328	-1	1		0.568317	0.70031	0.235459		0.535875	0.0385972	0.140187		-0.814456	-1	0.999829
		-0.974806	-0.854739	0.134942		-0.974745	-0.950197	0.982761		0.206517	0.460419	0.291174		-0.805481	-0.327742	0.166211		-0.805418	-0.686717	0.709944		-0.503673	-0.660223	0.990535		-0.164316	0.340854	0.24999		-0.164472	0.231499	0.418252		-0.98537	-1	1		0.57338	0.70347	0.232416		0.541229	0.0467026	0.141289		-0.807571	-0.995666	0.999834
		-0.975819	-0.853577	0.130762		-0.975778	-0.946879	0.986058		0.194734	0.449609	0.309358		-0.801864	-0.322786	0.162135		-0.801756	-0.676462	0.697266		-0.513975	-0.672645	0.990856		-0.158187	0.345507	0.246112		-0.158251	0.248271	0.397051		-0.986267	-1	1		0.578464	0.706586	0.22939		0.546552	0.0547107	0.1426		-0.800568	-0.990249	0.999845
		-0.976794	-0.852366	0.126585		-0.976769	-0.94337	0.989007		0.182921	0.438471	0.328388		-0.798216	-0.317829	0.158078		-0.798064	-0.665873	0.684076		-0.524202	-0.685068	0.991065		-0.152053	0.350163	0.242259		-0.15203	0.264784	0.376054		-0.987017	-1	1		0.583513	0.709655	0.226374		0.551845	0.0626541	0.144111		-0.793448	-0.984832	0.999863
		-0.97773	-0.851104	0.122406		-0.97772	-0.939768	0.991612		0.171079	0.426016	0.348255		-0.794536	-0.31287	0.154035		-0.794342	-0.655153	0.67035		-0.534353	-0.697491	0.991179		-0.145913	0.354818	0.238433		-0.145808	0.281099	0.355394		-0.98762	-1	1		0.588592	0.712675	0.223363		0.557107	0.070421	0.145809		-0.786211	-0.979415	0.999889
		-0.978627	-0.84979	0.118221		-0.978631	-0.935977	0.993885		0.159211	0.413562	0.368901		-0.790824	-0.307905	0.150004		-0.790591	-0.644235	0.656088		-0.544426	-0.709914	0.991214		-0.139767	0.35947	0.23464		-0.139586	0.29728	0.335203		-0.988076	-1	1		0.593572	0.715644	0.22035		0.562339	0.0781133	0.14768		-0.778858	-0.973998	0.999924
		-0.979486	-0.848424	0.114026		-0.979501	-0.932045	0.99584		0.147318	0.401107	0.390225		-0.787082	-0.302932	0.145983		-0.786811	-0.633056	0.641313		-0.554419	-0.722079	0.991185		-0.133615	0.364118	0.230883		-0.133362	0.313127	0.315611		-0.988384	-1	1		0.598443	0.718558	0.217327		0.567542	0.0856936	0.149709		-0.771391	-0.968581	0.999971
		-0.980306	-0.847005	0.10982		-0.98033	-0.92802	0.997498		0.135402	0.388653	0.412093		-0.783308	-0.297949	0.141975		-0.783001	-0.621748	0.626071		-0.56433	-0.733216	0.991106		-0.127458	0.36876	0.22717		-0.127138	0.328842	0.296749		-0.988545	-1	1		0.603429	0.721416	0.214289		0.572714	0.0931212	0.151869		-0.763811	-0.96196	1.00003
		-0.981088	-0.845532	0.105605		-0.981119	-0.923763	0.998881		0.123465	0.376198	0.434337		-0.779504	-0.292954	0.137985		-0.779162	-0.610179	0.610437		-0.574159	-0.744352	0.990989		-0.121296	0.373396	0.223505		-0.120913	0.344359	0.278743		-0.988557	-1	1		0.608421	0.724217	0.211233		0.577857	0.100472	0.154123		-0.756119	-0.953534	1.0001
		-0.981831	-0.844005	0.101383		-0.981868	-0.919413	1.00001		0.11151	0.363743	0.456772		-0.775668	-0.287945	0.134021		-0.775294	-0.598412	0.594507		-0.583904	-0.755488	0.990843		-0.11513	0.378025	0.219891		-0.114687	0.359614	0.261714		-0.988421	-1	1		0.613175	0.726957	0.208156		0.582971	0.10767	0.15642		-0.748316	-0.945107	1.00019
		-0.982535	-0.842426	0.0971565		-0.982577	-0.914926	1.00092		0.0995377	0.35012	0.479204		-0.771802	-0.282921	0.130094		-0.771396	-0.586513	0.578399		-0.593563	-0.766624	0.990678		-0.108958	0.382646	0.216332		-0.10846	0.374737	0.245771		-0.988136	-1	1		0.618003	0.729632	0.205062		0.588056	0.114755	0.158694		-0.740403	-0.936681	1.0003
		-0.9832	-0.840795	0.0929327		-0.983246	-0.910258	1.00163		0.0875504	0.336205	0.501446		-0.767906	-0.277881	0.126217		-0.76747	-0.57428	0.562247		-0.603136	-0.77776	0.990501		-0.102783	0.387258	0.212828		-0.102232	0.389597	0.231009		-0.987704	-1	1		0.623028	0.732241	0.201953		0.593112	0.121764	0.160867		-0.732381	-0.928255	1.00042
		-0.983826	-0.83911	0.0887187		-0.983875	-0.905499	1.00215		0.0755502	0.32229	0.523338		-0.763979	-0.272825	0.122405		-0.763515	-0.561912	0.546193		-0.61262	-0.788896	0.990318		-0.0966032	0.391859	0.209378		-0.0960041	0.404253	0.217502		-0.987125	-1	1		0.627839	0.734781	0.198837		0.59814	0.12859	0.162854		-0.724252	-0.919828	1.00056
		-0.984414	-0.837371	0.0845234		-0.984464	-0.90056	1.00253		0.0635388	0.308375	0.544752		-0.760022	-0.267754	0.118669		-0.759531	-0.549341	0.530381		-0.622015	-0.798975	0.990135		-0.0904198	0.396449	0.20598		-0.0897751	0.418775	0.205301		-0.9864	-1	1		0.632481	0.737249	0.195722		0.603138	0.135345	0.164571		-0.716016	-0.911402	1.00072
		-0.984962	-0.835575	0.0803569		-0.985014	-0.895489	1.00278		0.0515183	0.29446	0.565594		-0.756035	-0.262667	0.115021		-0.755518	-0.536499	0.514949		-0.631319	-0.80879	0.989955		-0.0842328	0.401028	0.202626		-0.0835455	0.432946	0.194431		-0.985529	-1	0.999999		0.63721	0.739643	0.192619		0.608109	0.141992	0.165934		-0.707675	-0.90116	1.0009
		-0.985472	-0.833721	0.0762303		-0.985523	-0.890329	1.00291		0.0394905	0.280544	0.585799		-0.752019	-0.257567	0.111468		-0.751476	-0.523521	0.500023		-0.64053	-0.818604	0.989783		-0.0780425	0.405596	0.199312		-0.0773153	0.44697	0.184887		-0.984512	-1	0.999999		0.641945	0.741961	0.189539		0.61305	0.148499	0.166874		-0.69923	-0.890919	1.0011
		-0.985943	-0.831806	0.0721559		-0.985993	-0.884953	1.00295		0.0274575	0.266145	0.605333		-0.747972	-0.252454	0.108014		-0.747406	-0.510273	0.485708		-0.649648	-0.828419	0.989619		-0.071849	0.410158	0.196027		-0.0710847	0.460771	0.176639		-0.98335	-1	0.999999		0.646706	0.744204	0.186496		0.617964	0.154936	0.167338		-0.690682	-0.880677	1.00132
		-0.986375	-0.829831	0.0681461		-0.986423	-0.87949	1.00292		0.0154211	0.251021	0.624198		-0.743896	-0.247331	0.104655		-0.743308	-0.496822	0.472085		-0.65867	-0.838233	0.989467		-0.0656528	0.414715	0.192763		-0.0648537	0.474263	0.169631		-0.982044	-1	1		0.651471	0.746369	0.183504		0.622849	0.161235	0.167298		-0.682031	-0.870435	1.00156
		-0.986768	-0.827795	0.0642133		-0.986814	-0.8739	1.00283		0.00338326	0.235896	0.642451		-0.739791	-0.242198	0.101387		-0.739181	-0.483236	0.459202		-0.667596	-0.848048	0.989328		-0.059454	0.419273	0.189511		-0.0586223	0.487597	0.163781		-0.980594	-1	1		0.656113	0.748453	0.180578		0.627706	0.167428	0.166753		-0.67328	-0.860194	1.00182
		-0.987122	-0.825702	0.0603691		-0.987165	-0.868143	1.0027		-0.00865406	0.220772	0.660194		-0.735657	-0.237056	0.098201		-0.735026	-0.469313	0.447077		-0.676424	-0.857342	0.989201		-0.0532528	0.423832	0.186261		-0.0523908	0.500608	0.158985		-0.979001	-1	1		0.660728	0.750456	0.177732		0.632534	0.17355	0.16573		-0.664429	-0.849952	1.00209
		-0.987437	-0.823554	0.0566233		-0.987477	-0.862304	1.00253		-0.0206889	0.205647	0.677567		-0.731493	-0.231905	0.0950876		-0.730842	-0.455254	0.435695		-0.685153	-0.865855	0.989087		-0.0470495	0.428397	0.183007		-0.0461593	0.513374	0.155124		-0.977266	-1	1		0.665355	0.752376	0.17498		0.637335	0.179489	0.164287		-0.655482	-0.838524	1.00237
		-0.987713	-0.821355	0.0529837		-0.987749	-0.856302	1.00234		-0.0327194	0.190523	0.694713		-0.7273	-0.226748	0.0920347		-0.726631	-0.440992	0.425017		-0.693781	-0.874368	0.988987		-0.0408444	0.432967	0.179741		-0.0399278	0.525975	0.152061		-0.975388	-1	1		0.669899	0.754211	0.172332		0.642108	0.185351	0.162507		-0.646438	-0.826306	1.00265
		-0.987951	-0.819106	0.049456		-0.987981	-0.850181	1.00214		-0.0447436	0.175398	0.711762		-0.723079	-0.221588	0.0890296		-0.722392	-0.426462	0.414978		-0.702307	-0.882881	0.988899		-0.0346376	0.437543	0.17646		-0.0336965	0.538166	0.14965		-0.973368	-1	1		0.674465	0.755962	0.169796		0.646852	0.191098	0.160497		-0.6373	-0.814087	1.00293
		-0.988149	-0.816813	0.0460432		-0.988175	-0.843981	1.00193		-0.0567595	0.159365	0.728811		-0.71883	-0.216428	0.0860594		-0.718125	-0.411798	0.405498		-0.71073	-0.891395	0.988823		-0.0284295	0.442125	0.17316		-0.0274656	0.550196	0.147737		-0.971207	-1	1		0.679054	0.757627	0.167375		0.651568	0.196683	0.158378		-0.62807	-0.801868	1.00319
		-0.988308	-0.814478	0.042746		-0.988329	-0.837589	1.00172		-0.0687653	0.143332	0.745911		-0.714552	-0.211272	0.0831124		-0.713831	-0.396869	0.396488		-0.719048	-0.899908	0.988759		-0.0222203	0.446714	0.169845		-0.0212352	0.561984	0.146164		-0.968906	-1	1		0.683543	0.759209	0.165072		0.656256	0.202187	0.156278		-0.618749	-0.78965	1.00344
		-0.988428	-0.812099	0.0395633		-0.988443	-0.831124	1.00151		-0.0807589	0.1273	0.76306		-0.710245	-0.206125	0.0801782		-0.709509	-0.381744	0.387853		-0.727259	-0.908421	0.988705		-0.0160102	0.451308	0.166518		-0.0150053	0.573456	0.144777		-0.966464	-1	1		0.688016	0.760706	0.162882		0.660915	0.207526	0.154327		-0.609339	-0.777431	1.00365
		-0.988509	-0.80968	0.0364931		-0.988518	-0.824548	1.00131		-0.0927385	0.111267	0.780194		-0.705911	-0.20099	0.0772491		-0.70516	-0.366488	0.379497		-0.735363	-0.915692	0.988661		-0.00979942	0.455906	0.163187		-0.00877624	0.584771	0.143429		-0.963883	-1	1		0.692555	0.762121	0.160798		0.665547	0.212745	0.152646		-0.599842	-0.764794	1.00381
		-0.988551	-0.807219	0.0335335		-0.988554	-0.817829	1.00112		-0.104702	0.0952338	0.797178		-0.701549	-0.195871	0.0743203		-0.700783	-0.350908	0.37133		-0.743358	-0.922963	0.988625		-0.00358828	0.460511	0.159864		-0.00254807	0.595776	0.141986		-0.961163	-1	1		0.696928	0.763455	0.158807		0.67015	0.217884	0.151345		-0.590259	-0.750478	1.0039
		-0.988554	-0.804717	0.0306831		-0.988551	-0.811041	1.00095		-0.116648	0.079201	0.813819		-0.697159	-0.190774	0.0713908		-0.696379	-0.335202	0.363271		-0.751243	-0.930234	0.988598		0.002623	0.465124	0.156564		0.00367899	0.606554	0.140336		-0.958304	-1	1		0.701239	0.76471	0.156897		0.674725	0.222829	0.150516		-0.580593	-0.736163	1.00391
		-0.988518	-0.802174	0.0279406		-0.988508	-0.804115	1.00078		-0.128574	0.0628246	0.829884		-0.692741	-0.185704	0.068464		-0.691949	-0.319305	0.35525		-0.759016	-0.937505	0.988577		0.00883417	0.469749	0.153302		0.00990477	0.617181	0.138395		-0.955307	-1	1		0.705716	0.765888	0.155054		0.679272	0.227698	0.150237		-0.570844	-0.721848	1.00382
		-0.988443	-0.799591	0.0253046		-0.988426	-0.797087	1.00064		-0.140478	0.0462193	0.845126		-0.688297	-0.180664	0.0655476		-0.687491	-0.303158	0.347215		-0.766676	-0.944776	0.988562		0.015045	0.474386	0.150094		0.0161291	0.627432	0.136107		-0.952173	-1	1		0.710048	0.766992	0.153263		0.68379	0.232455	0.150565		-0.561014	-0.707533	1.0036
		-0.988329	-0.796966	0.0227731		-0.988305	-0.789993	1.00051		-0.152359	0.0296139	0.85931		-0.683825	-0.175654	0.0626534		-0.683007	-0.28689	0.339132		-0.774221	-0.952047	0.988552		0.0212552	0.479038	0.146959		0.0223518	0.637533	0.133446		-0.948902	-1	1		0.714346	0.768023	0.151511		0.688279	0.237061	0.151539		-0.551106	-0.693218	1.00322
		-0.988176	-0.794299	0.0203435		-0.988145	-0.782731	1.00039		-0.164214	0.0130086	0.872232		-0.679326	-0.170674	0.0597964		-0.678496	-0.270381	0.330981		-0.78165	-0.958623	0.988546		0.0274646	0.483706	0.143911		0.0285728	0.647409	0.130412		-0.945494	-1	1.00001		0.718608	0.768984	0.149788		0.69274	0.241591	0.153172		-0.54112	-0.678903	1.00266
		-0.987984	-0.791592	0.0180125		-0.987946	-0.775404	1.00029		-0.176043	-0.00359679	0.883738		-0.6748	-0.165724	0.0569939		-0.673959	-0.253698	0.322757		-0.788963	-0.964736	0.988544		0.0336729	0.488387	0.140968		0.0347917	0.656984	0.127033		-0.941951	-1	1.00001		0.722815	0.769877	0.148084		0.697173	0.245971	0.155461		-0.531059	-0.662864	1.00188
		-0.987753	-0.788845	0.0157761		-0.987708	-0.767979	1.0002		-0.187844	-0.0202021	0.893734		-0.670248	-0.160803	0.0542638		-0.669396	-0.236899	0.314462		-0.796156	-0.970849	0.988545		0.0398799	0.493081	0.138142		0.0410085	0.666409	0.123353		-0.938272	-1	1.00001		0.727133	0.770707	0.146389		0.701576	0.250236	0.158382		-0.520924	-0.646394	1.00086
		-0.987483	-0.78606	0.0136293		-0.98743	-0.760425	1.00013		-0.199613	-0.0368506	0.90219		-0.665669	-0.155908	0.0516242		-0.664807	-0.219821	0.306109		-0.803229	-0.976961	0.988548		0.0460853	0.497786	0.13545		0.047223	0.675537	0.11943		-0.934459	-1	1.00001		0.73126	0.771475	0.144697		0.705951	0.254427	0.161901		-0.510717	-0.629924	0.999565
		-0.987174	-0.783238	0.0115669		-0.987113	-0.752807	1.00007		-0.211351	-0.0536714	0.909141		-0.661064	-0.151039	0.0490916		-0.660192	-0.202636	0.297709		-0.810181	-0.983074	0.988553		0.0522889	0.502501	0.132903		0.0534349	0.684443	0.11533		-0.930511	-1	1.00001		0.735461	0.772186	0.143005		0.710297	0.258433	0.165976		-0.50044	-0.613454	0.997957
		-0.986826	-0.780383	0.00958297		-0.986758	-0.745064	1.00002		-0.223055	-0.0704923	0.914682		-0.656432	-0.146191	0.0466808		-0.655551	-0.185291	0.289278		-0.817011	-0.989187	0.988559		0.0584904	0.507225	0.130513		0.059644	0.693201	0.111117		-0.92643	-1	1.00001		0.739718	0.772842	0.141308		0.714614	0.262367	0.170559		-0.490094	-0.596985	0.996007
		-0.986439	-0.777495	0.00767144		-0.986363	-0.737231	0.999974		-0.234722	-0.0873131	0.918964		-0.651775	-0.141361	0.0444045		-0.650884	-0.167745	0.280827		-0.823716	-0.994262	0.988566		0.0646896	0.511955	0.128291		0.0658502	0.701595	0.106858		-0.922215	-1	1.00001		0.743686	0.773445	0.139608		0.718902	0.266192	0.1756		-0.479681	-0.580515	0.993681
		-0.986013	-0.774579	0.00582628		-0.985929	-0.729337	0.999943		-0.246353	-0.104134	0.922183		-0.647092	-0.136546	0.0422737		-0.646193	-0.150102	0.272359		-0.830296	-0.995188	0.988574		0.0708863	0.516692	0.126247		0.0720532	0.709844	0.102614		-0.917868	-1	1.00001		0.747757	0.773998	0.137905		0.72316	0.269872	0.181049		-0.469202	-0.563194	0.990952
		-0.985548	-0.771638	0.00404204		-0.985457	-0.721298	0.999918		-0.257944	-0.120955	0.924566		-0.642384	-0.131744	0.0402978		-0.641475	-0.132272	0.26387		-0.836751	-0.996113	0.988582		0.0770801	0.521433	0.124388		0.0782528	0.717878	0.0984367		-0.913388	-1	1.00001		0.751916	0.774505	0.136202		0.727389	0.273478	0.186866		-0.45866	-0.544597	0.987795
		-0.985044	-0.768673	0.00231416		-0.984945	-0.713203	0.999901		-0.269494	-0.137776	0.92635		-0.63765	-0.126952	0.0384848		-0.636733	-0.114315	0.255347		-0.843081	-0.997039	0.98859		0.083271	0.526178	0.122718		0.0844489	0.725631	0.0943706		-0.908777	-1	1.00001		0.755906	0.77497	0.134503		0.731589	0.276936	0.193017		-0.448056	-0.526001	0.98419
		-0.984502	-0.765685	0.000639737		-0.984394	-0.705027	0.999889		-0.281002	-0.154492	0.927765		-0.632891	-0.122172	0.0368403		-0.631966	-0.0962718	0.246775		-0.849283	-0.997964	0.988598		0.0894585	0.530924	0.12124		0.0906412	0.733245	0.0904432		-0.904036	-1	1.00001		0.759885	0.775396	0.132813		0.735759	0.28028	0.199482		-0.437391	-0.507404	0.980126
		-0.98392	-0.762675	-0.000981776		-0.983805	-0.696746	0.999882		-0.292465	-0.171183	0.929022		-0.628107	-0.117405	0.0353676		-0.627174	-0.0780355	0.238139		-0.855359	-0.998889	0.988606		0.0956425	0.53567	0.119952		0.0968296	0.740588	0.086664		-0.899165	-1	1		0.763872	0.775784	0.131134		0.7399	0.283547	0.206241		-0.426668	-0.488807	0.975601
		-0.9833	-0.75964	-0.00254837		-0.983177	-0.688416	0.999878		-0.303881	-0.187873	0.9303		-0.623299	-0.112653	0.0340668		-0.622358	-0.0597295	0.229431		-0.861306	-0.999815	0.988613		0.101823	0.540415	0.118852		0.103014	0.747737	0.083023		-0.894167	-1	1		0.767757	0.77614	0.129471		0.74401	0.286619	0.213268		-0.415888	-0.47021	0.970627
		-0.982641	-0.756581	-0.00405576		-0.982509	-0.679991	0.999877		-0.31525	-0.204564	0.931751		-0.618465	-0.107916	0.0329354		-0.617517	-0.041319	0.220657		-0.867126	-1	0.98862		0.107999	0.545156	0.117931		0.109193	0.754757	0.0794896		-0.889042	-1	1		0.771672	0.776466	0.127826		0.748091	0.289614	0.220527		-0.405053	-0.451614	0.965228
		-0.981943	-0.753499	-0.00549775		-0.981803	-0.6715	0.999879		-0.326568	-0.221254	0.933493		-0.613608	-0.103192	0.0319678		-0.612652	-0.0227846	0.211837		-0.872816	-1	0.988626		0.114171	0.54989	0.117183		0.115368	0.761474	0.0760161		-0.883792	-1	0.999998		0.775571	0.776767	0.1262		0.752142	0.292492	0.227967		-0.394165	-0.43103	0.959449
		-0.981206	-0.75039	-0.00686647		-0.981059	-0.662966	0.999882		-0.337835	-0.237945	0.935615		-0.608726	-0.098481	0.0311559		-0.607763	-0.00419242	0.203012		-0.878377	-1	0.988631		0.120338	0.554616	0.116597		0.121539	0.768077	0.0725436		-0.878418	-1	0.999995		0.779312	0.777044	0.124593		0.756163	0.295218	0.235525		-0.383224	-0.410447	0.953356
		-0.98043	-0.747255	-0.00815287		-0.980275	-0.654335	0.999886		-0.349049	-0.254462	0.938173		-0.60382	-0.0937792	0.0304898		-0.602851	0.0145067	0.194235		-0.883808	-1	0.988636		0.126501	0.559332	0.116166		0.127704	0.774509	0.0690097		-0.872921	-1	0.999991		0.783134	0.777298	0.123005		0.760153	0.29787	0.243126		-0.372234	-0.389864	0.947036
		-0.979616	-0.744092	-0.00934721		-0.979453	-0.645669	0.99989		-0.360208	-0.27072	0.941185		-0.59889	-0.089084	0.0299583		-0.597914	0.0332709	0.185575		-0.889108	-1	0.988641		0.132659	0.564037	0.11588		0.133863	0.780724	0.0653563		-0.867302	-1	0.999986		0.787026	0.77753	0.121435		0.764113	0.300378	0.250687		-0.361195	-0.369281	0.940601
		-0.978763	-0.740898	-0.0104399		-0.978592	-0.636952	0.999894		-0.371309	-0.286978	0.944638		-0.593936	-0.0843926	0.0295498		-0.592954	0.0520785	0.177114		-0.894276	-1	0.988645		0.138811	0.568727	0.115734		0.140018	0.786834	0.0615347		-0.861563	-1	0.999981		0.790729	0.777739	0.119884		0.768042	0.302783	0.258113		-0.350109	-0.348697	0.934173
		-0.977872	-0.737675	-0.0114225		-0.977693	-0.628174	0.999897		-0.382352	-0.303236	0.94848		-0.588959	-0.0797029	0.0292526		-0.587971	0.0709654	0.168939		-0.899313	-1	0.988648		0.144958	0.573402	0.115719		0.146166	0.792738	0.0575081		-0.855705	-1	0.999974		0.794418	0.777924	0.118352		0.771941	0.30512	0.265312		-0.338978	-0.328114	0.927868
		-0.976942	-0.734421	-0.012288		-0.976755	-0.619366	0.9999		-0.393335	-0.319493	0.952626		-0.583959	-0.0750133	0.0290551		-0.582965	0.0898714	0.161136		-0.904217	-1	0.988651		0.151099	0.57806	0.115827		0.152308	0.798498	0.0532529		-0.849728	-1	0.999967		0.798199	0.778085	0.116842		0.775809	0.307292	0.272189		-0.327804	-0.306509	0.921789
		-0.975973	-0.731139	-0.0130314		-0.975778	-0.610505	0.999901		-0.404255	-0.335751	0.956968		-0.578936	-0.0703224	0.0289459		-0.577935	0.108806	0.153781		-0.908988	-1	0.988654		0.157235	0.582699	0.116045		0.158445	0.804162	0.048759		-0.843636	-1	0.999959		0.801762	0.77822	0.115357		0.779646	0.309401	0.278654		-0.316589	-0.284224	0.916011
		-0.974966	-0.727829	-0.0136499		-0.974763	-0.601608	0.999901		-0.415112	-0.352009	0.961392		-0.57389	-0.0656294	0.0289137		-0.572883	0.127753	0.146931		-0.913625	-1	0.988656		0.163364	0.587319	0.116361		0.164575	0.809599	0.0440306		-0.837428	-0.996361	0.99995		0.80538	0.77833	0.113901		0.783452	0.311414	0.284625		-0.305335	-0.261938	0.910584
		-0.97392	-0.724494	-0.0141428		-0.973709	-0.592688	0.999899		-0.425903	-0.367587	0.965791		-0.568821	-0.0609344	0.0289464		-0.567809	0.146698	0.140621		-0.918128	-1	0.988657		0.169486	0.591918	0.116761		0.170698	0.814949	0.0390858		-0.831105	-0.990297	0.99994		0.80914	0.778415	0.112478		0.787227	0.313303	0.290028		-0.294043	-0.239653	0.905533
		-0.972836	-0.721137	-0.0145122		-0.972617	-0.583721	0.999896		-0.436626	-0.383165	0.970071		-0.56373	-0.0562373	0.0290317		-0.562712	0.165628	0.134867		-0.922495	-1	0.988658		0.175602	0.596493	0.117229		0.176814	0.820168	0.0339561		-0.82467	-0.984233	0.99993		0.812629	0.778476	0.111091		0.79097	0.315131	0.294807		-0.282715	-0.217367	0.900867
		-0.971714	-0.717761	-0.0147629		-0.971487	-0.574739	0.999891		-0.44728	-0.398744	0.974162		-0.558616	-0.0515372	0.0291568		-0.557593	0.184523	0.12966		-0.926727	-1	0.988659		0.181711	0.601044	0.11775		0.182923	0.825216	0.0286852		-0.818123	-0.978169	0.999918		0.816144	0.778514	0.109745		0.794683	0.316843	0.298929		-0.271353	-0.195081	0.896576
		-0.970553	-0.714369	-0.0149019		-0.970318	-0.565735	0.999885		-0.457863	-0.414322	0.978012		-0.553481	-0.0468343	0.0293086		-0.552452	0.203396	0.124969		-0.930823	-1	0.98866		0.187813	0.605569	0.11831		0.189025	0.83018	0.0233288		-0.811466	-0.972104	0.999907		0.819585	0.77853	0.108444		0.798363	0.318472	0.302386		-0.259959	-0.172547	0.89264
		-0.969353	-0.710963	-0.0149382		-0.969111	-0.556708	0.999877		-0.468374	-0.4299	0.981581		-0.548323	-0.0421292	0.0294747		-0.54729	0.222173	0.120735		-0.934782	-1	0.988661		0.193907	0.610067	0.118896		0.19512	0.834976	0.0179516		-0.804699	-0.96604	0.999894		0.822987	0.778524	0.107195		0.802012	0.320047	0.3052		-0.248535	-0.149021	0.889026
		-0.968116	-0.707545	-0.0148824		-0.967865	-0.547671	0.999867		-0.478809	-0.445478	0.984849		-0.543144	-0.037423	0.0296442		-0.542106	0.240895	0.116871		-0.938604	-1	0.988661		0.199994	0.614538	0.119496		0.201206	0.839651	0.0126263		-0.797825	-0.959671	0.999882		0.826614	0.778497	0.106001		0.805629	0.321492	0.307419		-0.237082	-0.125494	0.885697
		-0.96684	-0.704117	-0.0147467		-0.966582	-0.538616	0.999857		-0.489169	-0.460542	0.987801		-0.537944	-0.0327152	0.0298093		-0.5369	0.259535	0.113269		-0.942287	-1	0.988661		0.206073	0.618983	0.1201		0.207285	0.844246	0.00743025		-0.790843	-0.952084	0.99987		0.829946	0.778453	0.104869		0.809214	0.322886	0.309113		-0.225603	-0.101968	0.882606
		-0.965526	-0.700682	-0.0145448		-0.96526	-0.529549	0.999846		-0.499451	-0.475263	0.990436		-0.532722	-0.0280058	0.0299649		-0.531674	0.278029	0.109804		-0.945832	-1	0.988661		0.212144	0.623405	0.120699		0.213355	0.848647	0.00244074		-0.783757	-0.944498	0.999858		0.833164	0.778393	0.103805		0.812767	0.324204	0.310372		-0.214099	-0.0784415	0.879705
		-0.964174	-0.697246	-0.0142915		-0.9639	-0.520476	0.999834		-0.509654	-0.489984	0.992758		-0.527479	-0.0232937	0.0301082		-0.526427	0.296441	0.106349		-0.949238	-1	0.988661		0.218206	0.627803	0.121288		0.219416	0.852976	-0.00227222		-0.776566	-0.936911	0.999848		0.8366	0.778317	0.102813		0.816288	0.325422	0.311295		-0.202571	-0.054915	0.876943
		-0.962784	-0.693811	-0.0140015		-0.962502	-0.511385	0.999823		-0.519778	-0.504705	0.994777		-0.522216	-0.0185764	0.0302385		-0.521159	0.314671	0.102786		-0.952504	-1	0.988661		0.22426	0.63218	0.121861		0.225469	0.857194	-0.00665282		-0.769272	-0.929324	0.999839		0.839954	0.778227	0.101898		0.819776	0.326591	0.311981		-0.191023	-0.0313885	0.874271
		-0.961356	-0.69038	-0.0136884		-0.961066	-0.502288	0.999812		-0.529821	-0.519425	0.996511		-0.516932	-0.013853	0.0303561		-0.515871	0.33274	0.099021		-0.955629	-1	0.98866		0.230305	0.636537	0.122414		0.231512	0.861271	-0.010664		-0.761877	-0.921738	0.999832		0.843133	0.778122	0.101064		0.823232	0.327663	0.312525		-0.179455	-0.00739325	0.87164
		-0.95989	-0.686954	-0.0133641		-0.959593	-0.49318	0.999803		-0.539781	-0.534146	0.997976		-0.511627	-0.00912264	0.0304625		-0.510562	0.350701	0.0949934		-0.958613	-1	0.98866		0.236341	0.640876	0.122946		0.237547	0.865278	-0.0142894		-0.75438	-0.914151	0.999829		0.846364	0.778002	0.100311		0.826656	0.328667	0.313008		-0.16787	0.0167192	0.869004
		-0.958386	-0.683534	-0.0130372		-0.958081	-0.484058	0.999796		-0.549658	-0.548669	0.999195		-0.506302	-0.00438303	0.0305599		-0.505234	0.368358	0.0906831		-0.961456	-1	0.98866		0.242367	0.6452	0.123457		0.243571	0.869146	-0.0175334		-0.746785	-0.905452	0.999829		0.849624	0.777865	0.0996368		0.830046	0.329626	0.313505		-0.156269	0.0408316	0.866324
		-0.956845	-0.680118	-0.0127132		-0.956532	-0.474929	0.999793		-0.559451	-0.562397	1.00019		-0.500958	0.000367738	0.0306515		-0.499885	0.385883	0.0861145		-0.964156	-1	0.988659		0.248384	0.649509	0.12395		0.249586	0.872909	-0.0204189		-0.739092	-0.896474	0.999834		0.852708	0.777712	0.0990373		0.833404	0.330485	0.314071		-0.144654	0.064944	0.863562
		-0.955265	-0.676707	-0.0123941		-0.954945	-0.465785	0.999794		-0.569158	-0.576126	1.00098		-0.495593	0.00513062	0.0307405		-0.494517	0.403208	0.0813545		-0.966714	-1	0.988659		0.254391	0.653802	0.124426		0.255591	0.876602	-0.0229839		-0.731302	-0.887496	0.999845		0.855892	0.77754	0.0985039		0.836729	0.331311	0.314745		-0.133027	0.0890564	0.860694
		-0.953648	-0.673297	-0.012079		-0.95332	-0.456629	0.999801		-0.578777	-0.589854	1.00159		-0.490209	0.00990494	0.0308304		-0.489129	0.420248	0.0765059		-0.969128	-1	0.988658		0.260388	0.65808	0.124891		0.261586	0.880113	-0.0252772		-0.723416	-0.878518	0.999863		0.859031	0.777351	0.0980265		0.840021	0.332089	0.315544		-0.12139	0.113169	0.857706
		-0.951993	-0.669884	-0.0117643		-0.951657	-0.447463	0.999814		-0.588309	-0.603583	1.00205		-0.484805	0.0146891	0.030925		-0.483722	0.437141	0.071698		-0.971399	-1	0.988658		0.266375	0.66234	0.125351		0.267571	0.883548	-0.0273534		-0.715436	-0.869541	0.999889		0.861986	0.777147	0.0975938		0.843279	0.332817	0.316459		-0.109745	0.137202	0.854599
		-0.950301	-0.666466	-0.0114451		-0.949957	-0.438272	0.999836		-0.597751	-0.617311	1.00237		-0.479383	0.0194816	0.0310284		-0.478295	0.453731	0.0670762		-0.973527	-1	0.988658		0.272351	0.666579	0.125812		0.273545	0.886867	-0.0292683		-0.707363	-0.860563	0.999924		0.865136	0.776928	0.0971945		0.846505	0.333525	0.317453		-0.0980929	0.161116	0.851385
		-0.948571	-0.663038	-0.011115		-0.94822	-0.429068	0.999868		-0.607103	-0.63104	1.00257		-0.473941	0.0242808	0.0311442		-0.47285	0.470079	0.0627909		-0.975513	-1	0.988657		0.278317	0.670797	0.126279		0.279508	0.89002	-0.0310739		-0.699198	-0.850992	0.999971		0.868169	0.776695	0.0968184		0.849696	0.3342	0.318469		-0.0864361	0.18503	0.848072
		-0.946803	-0.659598	-0.0107671		-0.946445	-0.419844	0.999912		-0.616363	-0.643866	1.00267		-0.468481	0.0290857	0.0312758		-0.467386	0.486266	0.0589864		-0.977356	-1	0.988657		0.284271	0.67499	0.126756		0.28546	0.893087	-0.0328135		-0.690943	-0.840532	1.00003		0.870976	0.77645	0.0964564		0.852854	0.334864	0.319432		-0.0747765	0.208944	0.844665
		-0.944998	-0.656141	-0.0103946		-0.944633	-0.410591	0.999969		-0.62553	-0.656467	1.0027		-0.463002	0.0338952	0.0314258		-0.461903	0.502023	0.0557908		-0.979057	-1	0.988657		0.290214	0.679161	0.127248		0.291401	0.895975	-0.034518		-0.6826	-0.830071	1.0001		0.873994	0.776193	0.0961007		0.855978	0.33552	0.320259		-0.0631157	0.232858	0.841159
		-0.943156	-0.652666	-0.00999126		-0.942783	-0.401321	1.00004		-0.634603	-0.669067	1.00266		-0.457505	0.0387098	0.031595		-0.456403	0.517598	0.0533094		-0.980617	-1	0.988657		0.296146	0.683308	0.127754		0.29733	0.898719	-0.0362033		-0.674169	-0.819611	1.00019		0.876926	0.775926	0.0957449		0.859069	0.336177	0.320867		-0.0514557	0.256772	0.837541
		-0.941277	-0.649171	-0.00955221		-0.940897	-0.392018	1.00013		-0.643581	-0.681668	1.00257		-0.45199	0.0435317	0.0317829		-0.450884	0.532898	0.0516202		-0.982035	-1	0.988656		0.302066	0.68743	0.128275		0.303248	0.901367	-0.0378678		-0.665653	-0.80915	1.0003		0.879677	0.77565	0.0953844		0.862125	0.336842	0.321181		-0.0397983	0.280686	0.83379
		-0.93936	-0.645654	-0.00907418		-0.938973	-0.38269	1.00024		-0.652462	-0.694268	1.00244		-0.446457	0.0483645	0.0319871		-0.445348	0.547814	0.0507706		-0.983311	-1	0.988656		0.307975	0.691525	0.12881		0.309154	0.903765	-0.0394899		-0.657054	-0.79869	1.00042		0.882664	0.775365	0.0950167		0.865147	0.337519	0.32114		-0.0281453	0.303634	0.829885
		-0.937407	-0.642112	-0.00855548		-0.937012	-0.373344	1.00037		-0.661246	-0.706869	1.00228		-0.440907	0.0532128	0.032204		-0.439794	0.562534	0.0507706		-0.984447	-1	0.988656		0.313871	0.695592	0.129359		0.315048	0.906061	-0.0410266		-0.648372	-0.78823	1.00056		0.885405	0.775073	0.094641		0.868135	0.338227	0.3207		-0.0164985	0.326582	0.825802
		-0.935416	-0.638543	-0.00799608		-0.935014	-0.363955	1.00052		-0.669931	-0.71897	1.0021		-0.435339	0.0580808	0.0324292		-0.434222	0.576854	0.0515885		-0.985441	-1	0.988656		0.319754	0.699631	0.129922		0.320929	0.908205	-0.0424152		-0.639609	-0.776233	1.00072		0.887987	0.774773	0.0942587		0.871089	0.338953	0.319832		-0.00485975	0.349529	0.821517
		-0.933389	-0.634945	-0.00739771		-0.932979	-0.354551	1.00069		-0.678515	-0.730323	1.00192		-0.429754	0.0629731	0.0326582		-0.428634	0.590863	0.0531493		-0.986296	-1	0.988656		0.325625	0.703642	0.130496		0.326797	0.910148	-0.0435776		-0.630767	-0.764237	1.0009		0.890864	0.774466	0.0938724		0.874008	0.339723	0.318515		0.0067691	0.372477	0.817012
		-0.931324	-0.631317	-0.00676401		-0.930907	-0.345124	1.00089		-0.686999	-0.741676	1.00172		-0.424152	0.067894	0.032887		-0.423028	0.604665	0.0553408		-0.98701	-1	0.988656		0.331483	0.707623	0.131082		0.332653	0.911991	-0.0444277		-0.621848	-0.752241	1.0011		0.893541	0.77415	0.0934863		0.876893	0.340535	0.316736		0.0183863	0.395425	0.812273
		-0.929223	-0.627657	-0.00610053		-0.928799	-0.335671	1.00111		-0.69538	-0.753028	1.00153		-0.418533	0.0728469	0.0331128		-0.417406	0.617928	0.0580234		-0.987584	-1	0.988656		0.337329	0.711574	0.131678		0.338495	0.913637	-0.0448806		-0.612853	-0.740245	1.00132		0.896125	0.773826	0.0931053		0.879743	0.341375	0.314494		0.0299903	0.418372	0.807297
		-0.927085	-0.623965	-0.00541417		-0.926653	-0.326205	1.00136		-0.703657	-0.764381	1.00134		-0.412897	0.0778343	0.0333333		-0.411767	0.630969	0.0610466		-0.988018	-1	0.988656		0.34316	0.715495	0.132283		0.344325	0.91514	-0.0448619		-0.603783	-0.728248	1.00156		0.898769	0.773489	0.0927349		0.882559	0.3423	0.311799		0.0415795	0.440351	0.802091
		-0.924911	-0.62024	-0.00471216		-0.924472	-0.31672	1.00163		-0.71183	-0.775734	1.00116		-0.407246	0.0828577	0.0335469		-0.406113	0.643675	0.0642682		-0.988313	-1	0.988656		0.348979	0.719386	0.132895		0.35014	0.916548	-0.0443123		-0.594641	-0.716252	1.00182		0.901368	0.773138	0.0923808		0.88534	0.343263	0.308673		0.0531525	0.461685	0.796679
		-0.9227	-0.616481	-0.00400112		-0.922253	-0.307226	1.00192		-0.719896	-0.787087	1.00099		-0.401578	0.0879177	0.0337521		-0.400442	0.655923	0.0675707		-0.988469	-1	0.988657		0.354783	0.723247	0.133512		0.355942	0.917733	-0.043191		-0.585427	-0.703323	1.00209		0.903972	0.77277	0.0920476		0.888086	0.344285	0.305144		0.0647076	0.483019	0.791101
		-0.920453	-0.612691	-0.00328642		-0.919999	-0.297724	1.00224		-0.727856	-0.797127	1.00083		-0.395894	0.093014	0.0339473		-0.394755	0.667938	0.0708714		-0.988486	-1	0.988657		0.360574	0.727078	0.134134		0.361729	0.918839	-0.0414759		-0.576144	-0.689773	1.00237		0.906434	0.772382	0.0917382		0.890796	0.345394	0.301245		0.0762434	0.504352	0.78542
		-0.918169	-0.608869	-0.0025719		-0.917708	-0.288215	1.00257		-0.735707	-0.807167	1.00069		-0.390195	0.0981452	0.0341317		-0.389053	0.679484	0.0741255		-0.988364	-1	0.988657		0.36635	0.730877	0.134756		0.367503	0.919825	-0.039164		-0.566793	-0.676222	1.00265		0.908883	0.771971	0.0914536		0.893472	0.346549	0.297004		0.0877583	0.525686	0.779716
		-0.915849	-0.605016	-0.00185993		-0.915381	-0.278707	1.00291		-0.743448	-0.817208	1.00055		-0.384481	0.10331	0.0343044		-0.383335	0.690674	0.077326		-0.988104	-1	0.988658		0.372111	0.734644	0.135379		0.373261	0.920671	-0.0362711		-0.557375	-0.662672	1.00293		0.911343	0.771537	0.0911926		0.896112	0.347799	0.292441		0.0992507	0.54702	0.774084
		-0.913493	-0.601135	-0.00115165		-0.913017	-0.269199	1.00326		-0.751079	-0.827248	1.00044		-0.378751	0.108507	0.0344647		-0.377602	0.701624	0.0804997		-0.987706	-1	0.988658		0.377859	0.738378	0.136002		0.379006	0.92145	-0.0328309		-0.547893	-0.649121	1.00319		0.913752	0.771082	0.0909528		0.898717	0.349128	0.287569		0.110719	0.567934	0.768627
		-0.911101	-0.597227	-0.00044716		-0.910618	-0.259698	1.0036		-0.758597	-0.837289	1.00033		-0.373006	0.113736	0.0346118		-0.371854	0.71197	0.083701		-0.987169	-1	0.988659		0.383591	0.742079	0.136623		0.384735	0.922105	-0.0288934		-0.538348	-0.635571	1.00344		0.916101	0.770608	0.0907306		0.901287	0.350509	0.282394		0.122162	0.587171	0.763455
		-0.908673	-0.59329	0.000254001		-0.908183	-0.250202	1.00393		-0.766003	-0.847329	1.00024		-0.367247	0.118996	0.0347453		-0.366092	0.722068	0.0870024		-0.986496	-1	0.988659		0.389308	0.745748	0.13724		0.390449	0.922678	-0.0245235		-0.52874	-0.621704	1.00365		0.918386	0.770117	0.0905226		0.903821	0.352033	0.276913		0.133578	0.606409	0.758677
		-0.906209	-0.589323	0.000952096		-0.905711	-0.240719	1.00423		-0.773294	-0.856577	1.00016		-0.361473	0.124287	0.0348647		-0.360315	0.731797	0.0904846		-0.985685	-1	0.98866		0.395009	0.749385	0.13785		0.396147	0.923195	-0.019798		-0.519073	-0.606571	1.00381		0.920725	0.769611	0.0903264		0.906319	0.353617	0.271119		0.144965	0.625646	0.754393
		-0.903709	-0.585325	0.00164666		-0.903204	-0.231248	1.00449		-0.78047	-0.865296	1.0001		-0.355684	0.129605	0.0349702		-0.354524	0.741026	0.0942249		-0.984736	-1	0.98866		0.400695	0.752992	0.13845		0.40183	0.923594	-0.0148011		-0.509347	-0.591437	1.0039		0.923009	0.769095	0.0901403		0.908781	0.355293	0.265003		0.156323	0.644884	0.75069
		-0.901173	-0.581292	0.00233635		-0.900662	-0.221784	1.00469		-0.787532	-0.874016	1.00004		-0.349882	0.134946	0.0350618		-0.348719	0.750004	0.0982886		-0.983652	-1	0.988661		0.406366	0.75657	0.139037		0.407497	0.923952	-0.00961631		-0.499564	-0.576304	1.00391		0.925145	0.768571	0.0899642		0.911208	0.357099	0.258563		0.167648	0.664121	0.747634
		-0.898602	-0.577221	0.00301873		-0.898084	-0.212344	1.0048		-0.794478	-0.882735	0.999998		-0.344066	0.140309	0.0351397		-0.3429	0.75848	0.102722		-0.98243	-1	0.988662		0.41202	0.76012	0.139606		0.413148	0.924249	-0.00431786		-0.489726	-0.561171	1.00382		0.92736	0.768042	0.0897983		0.913598	0.358971	0.251804		0.178941	0.683359	0.745267
		-0.895996	-0.573109	0.00368978		-0.89547	-0.202916	1.00482		-0.801308	-0.891455	0.999962		-0.338236	0.145689	0.0352041		-0.337068	0.766577	0.107548		-0.981072	-1	0.988662		0.417658	0.763643	0.140154		0.418783	0.924476	0.00103972		-0.479835	-0.546038	1.0036		0.929573	0.767512	0.0896436		0.915953	0.360979	0.244748		0.190198	0.70072	0.74361
		-0.893354	-0.568954	0.00434341		-0.892821	-0.193504	1.0047		-0.808021	-0.900174	0.999934		-0.332393	0.151081	0.0352544		-0.331222	0.774422	0.112767		-0.979578	-1	0.988663		0.423279	0.767139	0.140675		0.424401	0.92467	0.00643026		-0.469891	-0.530905	1.00322		0.931625	0.766982	0.0895013		0.918271	0.363095	0.237428		0.20142	0.717612	0.742661
		-0.890677	-0.564757	0.00497147		-0.890137	-0.18412	1.00443		-0.814618	-0.908636	0.999913		-0.326537	0.156481	0.0352896		-0.325363	0.781641	0.11835		-0.977949	-1	0.988664		0.428884	0.770607	0.141168		0.430002	0.924804	0.0118614		-0.459896	-0.514459	1.00266		0.933727	0.766453	0.089373		0.920553	0.365282	0.229891		0.212603	0.734504	0.742399
		-0.887964	-0.560519	0.005564		-0.887418	-0.174749	1.00396		-0.821097	-0.916066	0.999898		-0.320668	0.161886	0.0353084		-0.319492	0.788611	0.124234		-0.976184	-1	0.988664		0.434472	0.774046	0.14163		0.435586	0.924894	0.017375		-0.449853	-0.497685	1.00188		0.935752	0.765927	0.0892603		0.922799	0.367656	0.222193		0.223747	0.751396	0.742786
		-0.885217	-0.556243	0.00611002		-0.884663	-0.16541	1.00327		-0.827459	-0.923496	0.999889		-0.314786	0.167293	0.03531		-0.313607	0.795208	0.13032		-0.974283	-1	0.988665		0.440042	0.777456	0.142059		0.441154	0.924956	0.0230435		-0.439762	-0.48091	1.00086		0.9377	0.765405	0.0891651		0.925008	0.370108	0.214406		0.234851	0.768288	0.743762
		-0.882435	-0.551934	0.00659856		-0.881874	-0.156099	1.00232		-0.833703	-0.930925	0.999883		-0.308892	0.1727	0.0352943		-0.307711	0.801311	0.136475		-0.972248	-1	0.988665		0.445595	0.780837	0.142457		0.446703	0.924949	0.0289619		-0.429625	-0.464136	0.999565		0.939752	0.764887	0.089089		0.927181	0.372675	0.206609		0.245912	0.78518	0.745248
		-0.879618	-0.547594	0.00701972		-0.87905	-0.146807	1.00107		-0.839828	-0.938355	0.999882		-0.302986	0.178107	0.0352625		-0.301802	0.807166	0.142539		-0.970079	-1	0.988665		0.451131	0.784189	0.142826		0.452236	0.924915	0.0352368		-0.419444	-0.447361	0.997957		0.941687	0.764373	0.0890331		0.929317	0.375397	0.198892		0.256929	0.801131	0.74715
		-0.876766	-0.543229	0.00736562		-0.876191	-0.137568	0.999474		-0.845834	-0.945785	0.999883		-0.297067	0.183512	0.0352163		-0.295881	0.812525	0.148342		-0.967777	-1	0.988665		0.456649	0.787514	0.143167		0.45775	0.924842	0.0419723		-0.40922	-0.430587	0.996007		0.943536	0.763863	0.0889978		0.931417	0.378196	0.191355		0.2679	0.815671	0.749357
		-0.873879	-0.538839	0.00763142		-0.873298	-0.128351	0.997498		-0.851721	-0.953215	0.999887		-0.291137	0.188917	0.0351583		-0.289949	0.817511	0.153717		-0.965343	-1	0.988665		0.462149	0.790809	0.143488		0.463246	0.924721	0.0492574		-0.398956	-0.413148	0.993681		0.945412	0.763359	0.0889822		0.93348	0.381148	0.184099		0.278825	0.83021	0.751748
		-0.870958	-0.534427	0.00781648		-0.87037	-0.119167	0.995098		-0.857488	-0.959658	0.999892		-0.285196	0.194323	0.0350915		-0.284005	0.822249	0.158517		-0.962778	-1	0.988664		0.46763	0.794073	0.143791		0.468724	0.92458	0.0571586		-0.388651	-0.394711	0.990952		0.947218	0.762861	0.0889838		0.935505	0.384211	0.177219		0.289701	0.84475	0.754195
		-0.868003	-0.529989	0.00792533		-0.867408	-0.110025	0.992238		-0.863135	-0.965854	0.999899		-0.279243	0.199732	0.0350185		-0.27805	0.826373	0.162622		-0.960083	-1	0.988663		0.473094	0.797306	0.144085		0.474183	0.924401	0.0657159		-0.378309	-0.376274	0.987795		0.948977	0.762369	0.0889975		0.937494	0.38735	0.170798		0.300526	0.85929	0.756567
		-0.865013	-0.525525	0.00796812		-0.864411	-0.100904	0.988881		-0.868661	-0.97205	0.999907		-0.273279	0.205146	0.0349416		-0.272084	0.830261	0.165948		-0.957258	-1	0.988662		0.478538	0.80051	0.144374		0.479624	0.9242	0.0749424		-0.367931	-0.357838	0.98419		0.95073	0.761885	0.0890155		0.939446	0.390669	0.164903		0.311301	0.873829	0.758735
		-0.861989	-0.521033	0.00796033		-0.86138	-0.0918244	0.984997		-0.874067	-0.978246	0.999915		-0.267305	0.210567	0.0348621		-0.266108	0.833794	0.168451		-0.954306	-1	0.98866		0.483964	0.803684	0.144666		0.485046	0.923985	0.0848226		-0.357517	-0.339401	0.980126		0.952388	0.761408	0.089028		0.941361	0.394057	0.159574		0.322022	0.888369	0.760577
		-0.858931	-0.51651	0.00792171		-0.858316	-0.0827763	0.980562		-0.87935	-0.984443	0.999923		-0.26132	0.215996	0.0347811		-0.26012	0.836877	0.170124		-0.951226	-1	0.988657		0.48937	0.806829	0.144964		0.490448	0.923739	0.0953125		-0.34707	-0.320964	0.975601		0.95405	0.760937	0.0890231		0.943239	0.39755	0.154827		0.332688	0.900681	0.761985
		-0.85584	-0.511958	0.00787496		-0.855217	-0.0737493	0.975562		-0.884512	-0.990639	0.999932		-0.255324	0.221432	0.0346991		-0.254123	0.839743	0.170992		-0.94802	-1	0.988654		0.494757	0.809947	0.145274		0.495832	0.923481	0.106338		-0.336591	-0.302527	0.970627		0.955714	0.76047	0.0889886		0.945079	0.401171	0.15065		0.343298	0.912994	0.762865
		-0.852714	-0.507378	0.00784455		-0.852085	-0.0647803	0.969991		-0.889551	-0.994709	0.99994		-0.249319	0.226877	0.0346163		-0.248115	0.842189	0.171108		-0.944689	-1	0.98865		0.500125	0.813038	0.1456		0.501195	0.923206	0.117796		-0.326081	-0.282537	0.965228		0.957247	0.760004	0.0889125		0.946883	0.404854	0.147011		0.35385	0.925306	0.76314
		-0.849555	-0.502769	0.00785529		-0.848919	-0.055838	0.963856		-0.894468	-0.995591	0.999948		-0.243303	0.232332	0.0345333		-0.242098	0.844342	0.170546		-0.941233	-1	0.988645		0.505473	0.816104	0.145943		0.506539	0.922903	0.129551		-0.315543	-0.262547	0.959449		0.958826	0.759538	0.0887846		0.948648	0.408654	0.143852		0.364343	0.937619	0.76274
		-0.846362	-0.498134	0.00793053		-0.84572	-0.0469359	0.957169		-0.899261	-0.996473	0.999955		-0.237278	0.237797	0.0344506		-0.236071	0.846298	0.169385		-0.937654	-1	0.988639		0.5108	0.819143	0.146304		0.511863	0.922585	0.141441		-0.304978	-0.242557	0.953356		0.960348	0.759069	0.0885973		0.950377	0.412529	0.141097		0.374775	0.949931	0.761596
		-0.843136	-0.493474	0.00809055		-0.842487	-0.0380969	0.949949		-0.903931	-0.997355	0.999962		-0.231244	0.243271	0.034369		-0.230035	0.847793	0.167704		-0.933952	-1	0.988632		0.516108	0.822156	0.14668		0.517167	0.922232	0.15328		-0.294387	-0.222567	0.947036		0.961785	0.758596	0.0883461		0.952067	0.416456	0.138661		0.385146	0.962244	0.759634
		-0.839877	-0.48879	0.0083511		-0.839221	-0.0292921	0.942219		-0.908477	-0.998236	0.999969		-0.2252	0.248753	0.0342894		-0.22399	0.849114	0.165581		-0.93013	-1	0.988624		0.521396	0.825141	0.147069		0.52245	0.921842	0.164868		-0.283771	-0.202577	0.940601		0.963273	0.758115	0.0880292		0.953721	0.420491	0.136448		0.395453	0.970247	0.756774
		-0.836584	-0.484084	0.00872272		-0.835922	-0.0205611	0.934009		-0.912898	-0.999118	0.999975		-0.219148	0.254244	0.0342125		-0.217936	0.850174	0.163087		-0.926186	-1	0.988615		0.526662	0.828095	0.147466		0.527713	0.921428	0.175998		-0.273133	-0.182587	0.934173		0.96468	0.757624	0.0876479		0.955336	0.424565	0.134364		0.405697	0.975377	0.75293
		-0.833259	-0.479357	0.00921057		-0.832589	-0.0118928	0.925351		-0.917195	-1	0.99998		-0.213087	0.259741	0.0341386		-0.211873	0.85091	0.160286		-0.922123	-1	0.988605		0.531908	0.831019	0.147865		0.532954	0.920933	0.186472		-0.262474	-0.161839	0.927868		0.965987	0.757121	0.0872061		0.956914	0.428697	0.132319		0.415876	0.980507	0.74801
		-0.8299	-0.474609	0.00981469		-0.829224	-0.00326619	0.916279		-0.921366	-1	0.999985		-0.207018	0.265243	0.0340673		-0.205802	0.851488	0.157235		-0.917942	-1	0.988594		0.537133	0.83391	0.148258		0.538175	0.920398	0.196116		-0.251795	-0.140586	0.921789		0.96726	0.756604	0.0867102		0.958454	0.432901	0.130231		0.42599	0.985636	0.741919
		-0.826509	-0.469839	0.01053		-0.825827	0.00524562	0.906834		-0.925411	-1	0.999989		-0.20094	0.270746	0.0339972		-0.199723	0.851765	0.153978		-0.913643	-1	0.988582		0.542337	0.836767	0.148638		0.543375	0.919804	0.204791		-0.241098	-0.119333	0.916011		0.968565	0.75607	0.086169		0.959956	0.43714	0.128026		0.436037	0.990766	0.734556
		-0.823085	-0.465047	0.0113462		-0.822396	0.0137076	0.897056		-0.92933	-1	0.999992		-0.194854	0.276251	0.0339261		-0.193635	0.85183	0.150546		-0.909227	-1	0.988569		0.547519	0.839589	0.148996		0.548553	0.919117	0.212401		-0.230384	-0.09808	0.910584		0.969836	0.755517	0.0855932		0.961421	0.441448	0.125645		0.446016	0.995896	0.725812
		-0.819629	-0.46023	0.0122486		-0.818933	0.0220948	0.886993		-0.933123	-1	0.999995		-0.188761	0.281757	0.0338516		-0.187541	0.851754	0.146952		-0.904695	-0.996019	0.988555		0.55268	0.842375	0.149327		0.553709	0.918383	0.218894		-0.219655	-0.076827	0.905533		0.971078	0.754942	0.0849959		0.962847	0.445803	0.12304		0.455926	1	0.715571
		-0.81614	-0.455387	0.0132184		-0.815438	0.0303742	0.876692		-0.936788	-1	0.999998		-0.18266	0.287263	0.0337724		-0.181439	0.85135	0.143196		-0.900049	-0.992039	0.98854		0.557819	0.845126	0.149625		0.558844	0.917552	0.224256		-0.208913	-0.0555741	0.900867		0.972316	0.754345	0.0843913		0.964235	0.450189	0.120183		0.465767	1	0.703717
		-0.812619	-0.450516	0.0142343		-0.811911	0.0385972	0.8662		-0.940326	-1	1		-0.176553	0.292771	0.0336878		-0.175329	0.850824	0.139268		-0.895289	-0.988058	0.988525		0.562936	0.847841	0.149888		0.563956	0.916651	0.228505		-0.198159	-0.0341697	0.896576		0.97332	0.753721	0.0837951		0.965586	0.454644	0.117066		0.475537	1	0.690142
		-0.809066	-0.445615	0.0152738		-0.808351	0.0467026	0.855561		-0.943736	-1	1		-0.170438	0.298278	0.0335982		-0.169213	0.850117	0.135162		-0.890416	-0.984077	0.98851		0.568031	0.850522	0.150117		0.569046	0.915701	0.231683		-0.187394	-0.0121592	0.89264		0.974354	0.753071	0.0832233		0.966898	0.459121	0.113699		0.485236	1	0.674769
		-0.805481	-0.440685	0.0163153		-0.80476	0.0547107	0.844807		-0.947019	-1	1		-0.164316	0.303784	0.0335042		-0.16309	0.849191	0.130876		-0.885431	-0.980097	0.988495		0.573103	0.853168	0.150312		0.574114	0.914641	0.233843		-0.17662	0.00985118	0.889026		0.975528	0.752389	0.0826914		0.968172	0.463632	0.11011		0.494862	1	0.657561
		-0.801864	-0.435726	0.0173398		-0.801137	0.0626541	0.833962		-0.950175	-1	1		-0.158188	0.309289	0.0334064		-0.156961	0.848163	0.126423		-0.880336	-0.976116	0.98848		0.578153	0.855779	0.150477		0.579159	0.913539	0.235047		-0.165839	0.0318616	0.885697		0.976488	0.751675	0.0822133		0.969408	0.468172	0.106339		0.504415	1	0.638533
		-0.798216	-0.430739	0.0183329		-0.797482	0.070421	0.823034		-0.953203	-1	1		-0.152054	0.314794	0.0333046		-0.150825	0.846944	0.12183		-0.87513	-0.969974	0.988467		0.583179	0.858357	0.150619		0.584181	0.912374	0.235367		-0.155052	0.053872	0.882606		0.977482	0.750925	0.0818001		0.970605	0.472723	0.102431		0.513893	1	0.617767
		-0.794536	-0.425727	0.0192855		-0.793796	0.0781133	0.812024		-0.956105	-1	1		-0.145913	0.3203	0.0331983		-0.144684	0.845603	0.117146		-0.869816	-0.962391	0.988456		0.588183	0.8609	0.150742		0.589181	0.911129	0.234878		-0.144261	0.0758824	0.879705		0.978511	0.750139	0.0814588		0.971764	0.477286	0.0984329		0.523296	1	0.595424
		-0.790824	-0.420689	0.0201951		-0.790078	0.0856936	0.800921		-0.958881	-1	1.00001		-0.139767	0.325804	0.033086		-0.138536	0.84418	0.112439		-0.864393	-0.954809	0.988448		0.593164	0.863408	0.150854		0.594156	0.909845	0.233666		-0.133467	0.0978928	0.876943		0.979377	0.749317	0.0811917		0.972885	0.481846	0.0943921		0.532622	1	0.571762
		-0.787082	-0.415627	0.021065		-0.786329	0.0931212	0.789705		-0.96153	-1	1.00001		-0.133616	0.331308	0.032966		-0.132384	0.842589	0.1078		-0.858864	-0.947226	0.988444		0.598121	0.865879	0.150964		0.599109	0.908479	0.231813		-0.122671	0.119991	0.874271		0.980254	0.748459	0.0809973		0.973968	0.486403	0.0903502		0.541871	1	0.547143
		-0.783308	-0.410543	0.0219033		-0.78255	0.100472	0.778346		-0.964054	-1	1.00001		-0.127459	0.336811	0.0328364		-0.126226	0.840942	0.103331		-0.853228	-0.939644	0.988444		0.603054	0.868312	0.151078		0.604038	0.907047	0.2294		-0.111876	0.142112	0.87164		0.981041	0.747565	0.0808706		0.975011	0.49093	0.086344		0.551042	1	0.522004
		-0.779504	-0.405436	0.0227223		-0.778739	0.10767	0.766809		-0.966452	-1	1		-0.121297	0.342313	0.0326963		-0.120063	0.839211	0.0991404		-0.847487	-0.932061	0.98845		0.607964	0.870707	0.151205		0.608943	0.905572	0.226494		-0.101083	0.164232	0.869004		0.981761	0.746634	0.0808039		0.976017	0.495437	0.0824064		0.560133	1	0.496821
		-0.775668	-0.40031	0.0235364		-0.774898	0.114755	0.755046		-0.968725	-1	1		-0.11513	0.347816	0.0325459		-0.113895	0.837391	0.0953314		-0.841642	-0.924168	0.988463		0.61285	0.873063	0.15135		0.613823	0.903974	0.223148		-0.0902931	0.186353	0.866324		0.982531	0.74567	0.080788		0.976984	0.499912	0.0785671		0.569143	1	0.472053
		-0.771802	-0.395166	0.0243609		-0.771025	0.121764	0.743006		-0.970873	-1	1		-0.108959	0.353319	0.0323872		-0.107723	0.83553	0.0919935		-0.835694	-0.915032	0.988486		0.617711	0.87538	0.151519		0.61868	0.902322	0.219397		-0.0795079	0.208473	0.863562		0.983247	0.744671	0.0808128		0.977912	0.504324	0.074855		0.578073	1	0.448108
		-0.767906	-0.390004	0.0252099		-0.767123	0.12859	0.730627		-0.972896	-1	1		-0.102783	0.358826	0.0322239		-0.101547	0.833601	0.0892004		-0.829645	-0.905895	0.988518		0.622549	0.877658	0.151716		0.623512	0.900587	0.21526		-0.0687291	0.230594	0.860694		0.983893	0.743639	0.0808681		0.978802	0.5087	0.0713003		0.58692	1	0.425329
		-0.763979	-0.384826	0.0260955		-0.76319	0.135345	0.717843		-0.974795	-1	1		-0.0966036	0.364339	0.0320611		-0.0953664	0.831636	0.0870066		-0.823496	-0.896759	0.988562		0.627361	0.879897	0.151942		0.62832	0.898735	0.210742		-0.0579582	0.252557	0.857706		0.984567	0.742574	0.0809438		0.979653	0.512994	0.0679351		0.595683	1	0.404
		-0.760022	-0.379634	0.027027		-0.759227	0.141992	0.704586		-0.97657	-1	1		-0.0904202	0.369861	0.0319038		-0.0891823	0.829646	0.0854441		-0.817247	-0.887623	0.98862		0.632149	0.882098	0.152198		0.633103	0.896821	0.205841		-0.0471963	0.274284	0.854599		0.985131	0.741476	0.0810306		0.980466	0.517215	0.0647926		0.604363	1	0.38435
		-0.756035	-0.374429	0.0280102		-0.755234	0.148499	0.690788		-0.978221	-1	1		-0.0842332	0.375391	0.0317566		-0.0829946	0.827619	0.0845191		-0.810902	-0.878487	0.988693		0.636912	0.884262	0.152485		0.637861	0.89478	0.200559		-0.0364446	0.296011	0.851385		0.985574	0.740347	0.0811205		0.981239	0.521387	0.0619051		0.612957	1	0.366553
		-0.752019	-0.369214	0.0290474		-0.751212	0.154936	0.676389		-0.979749	-1	1		-0.0780429	0.380931	0.0316231		-0.0768037	0.825583	0.0842115		-0.80446	-0.869351	0.988783		0.64165	0.88639	0.152798		0.642593	0.892638	0.194914		-0.0257045	0.317738	0.848072		0.986167	0.739186	0.0812078		0.981974	0.525423	0.0593005		0.621465	1	0.350715
		-0.747972	-0.363991	0.0301372		-0.747159	0.161235	0.661339		-0.981153	-1	1		-0.0718495	0.38648	0.0315062		-0.0706097	0.823535	0.0844776		-0.797923	-0.858879	0.988893		0.646362	0.88848	0.153134		0.647301	0.890428	0.188944		-0.0149769	0.339465	0.844665		0.986648	0.737995	0.0812897		0.982671	0.529399	0.056999		0.629885	1	0.336866
		-0.743896	-0.358763	0.0312737		-0.743078	0.167428	0.645601		-0.982435	-1	1		-0.0656532	0.392036	0.0314083		-0.0644129	0.82148	0.0852537		-0.791292	-0.848073	0.989023		0.651049	0.890532	0.15349		0.651982	0.88804	0.182717		-0.00426317	0.361192	0.841159		0.987008	0.736774	0.0813668		0.983328	0.533285	0.0550109		0.638218	1	0.32494
		-0.739791	-0.353531	0.0324475		-0.738966	0.17355	0.629147		-0.983594	-1	1		-0.0594544	0.397597	0.0313308		-0.0582136	0.819423	0.08646		-0.78457	-0.837267	0.989175		0.65571	0.892549	0.153861		0.656638	0.885579	0.176322		0.00643555	0.382919	0.837541		0.987521	0.735522	0.081443		0.983947	0.53704	0.0533365		0.646461	1	0.31478
		-0.735656	-0.348297	0.0336458		-0.734826	0.179489	0.611967		-0.98463	-1	1		-0.0532532	0.40316	0.0312754		-0.052012	0.817368	0.0880039		-0.777756	-0.826462	0.98935		0.660345	0.894529	0.154244		0.661268	0.883012	0.169865		0.0171181	0.404071	0.83379		0.987905	0.73424	0.0815254		0.984527	0.540727	0.0519691		0.654614	1	0.306145
		-0.731493	-0.343064	0.034854		-0.730657	0.185351	0.594062		-0.985545	-1	1		-0.0470499	0.408724	0.0312439		-0.0458083	0.815318	0.0897836		-0.770853	-0.815656	0.98955		0.664954	0.896475	0.154636		0.665872	0.880313	0.163461		0.0277832	0.425224	0.829885		0.988153	0.732928	0.0816236		0.985067	0.544272	0.0508972		0.662676	1	0.298727
		-0.7273	-0.337831	0.0360562		-0.726459	0.191098	0.575451		-0.986338	-1	1		-0.0408448	0.414285	0.0312388		-0.0396028	0.813272	0.0916929		-0.763862	-0.80485	0.989775		0.669537	0.898385	0.155035		0.67045	0.877553	0.15722		0.0384297	0.446376	0.825802		0.988426	0.731583	0.0817486		0.985569	0.547708	0.0501045		0.670646	1	0.292183
		-0.723079	-0.3326	0.0372367		-0.722232	0.196683	0.556173		-0.987009	-1	1		-0.034638	0.419839	0.0312631		-0.0333958	0.811239	0.0936286		-0.756784	-0.793345	0.990025		0.674094	0.900258	0.155439		0.675001	0.874681	0.151247		0.0490565	0.467529	0.821517		0.98855	0.730206	0.0819113		0.986033	0.551072	0.0495684		0.678524	1	0.286161
		-0.71883	-0.327369	0.0383805		-0.717976	0.202187	0.536282		-0.987559	-1	1		-0.0284299	0.425381	0.0313202		-0.0271874	0.809212	0.0954992		-0.74962	-0.780789	0.9903		0.678624	0.902093	0.155846		0.679526	0.871741	0.145632		0.0596623	0.488681	0.817012		0.988531	0.728795	0.0821221		0.986457	0.554255	0.0492553		0.686309	1	0.280329
		-0.714552	-0.322136	0.0394748		-0.713693	0.207526	0.515853		-0.987988	-1	1		-0.0222207	0.430907	0.0314129		-0.020978	0.807194	0.0972334		-0.742372	-0.768233	0.990597		0.683127	0.903887	0.156254		0.684024	0.868755	0.140454		0.070246	0.509834	0.812273		0.98853	0.727348	0.0823892		0.986842	0.557372	0.0491178		0.694	1	0.274392
		-0.710245	-0.316897	0.0405101		-0.709381	0.212745	0.494975		-0.988297	-1	1		-0.0160106	0.436417	0.0315441		-0.0147677	0.805192	0.0987826		-0.735041	-0.755678	0.990914		0.687603	0.905641	0.156664		0.688494	0.865684	0.13578		0.0808063	0.530589	0.807297		0.988533	0.725866	0.0827179		0.987188	0.56039	0.0490913		0.701599	1	0.268111
		-0.705911	-0.31165	0.0414817		-0.705041	0.217884	0.47375		-0.988485	-1	1		-0.00979981	0.441908	0.0317165		-0.00855688	0.8032	0.100119		-0.727629	-0.743122	0.991248		0.692052	0.907353	0.157076		0.692938	0.862588	0.131662		0.0913421	0.551079	0.802091		0.988527	0.724347	0.0831106		0.987496	0.563294	0.0490946		0.709103	1	0.26131
		-0.701549	-0.306393	0.0423898		-0.700673	0.222829	0.452293		-0.988553	-1	1		-0.00358867	0.44738	0.0319329		-0.0023457	0.801234	0.101233		-0.720136	-0.730566	0.991592		0.696474	0.909023	0.15749		0.697354	0.859454	0.128134		0.101852	0.571569	0.796679		0.988531	0.722788	0.0835663		0.987764	0.566145	0.0490343		0.716513	1	0.253895
		-0.697159	-0.301122	0.0432397		-0.696278	0.227698	0.430724		-0.988501	-1	1		0.00262261	0.452832	0.0321965		0.00386557	0.799301	0.102128		-0.712564	-0.718011	0.991942		0.700868	0.910652	0.157906		0.701743	0.856284	0.125216		0.112335	0.592059	0.791101		0.988528	0.721189	0.0840816		0.987993	0.5689	0.0488091		0.723829	1	0.245845
		-0.692741	-0.295834	0.0440406		-0.691855	0.232455	0.409169		-0.98833	-1	1		0.00883378	0.458264	0.0325111		0.0100767	0.797391	0.102823		-0.704915	-0.703678	0.992287		0.705234	0.912239	0.158324		0.706104	0.853098	0.122906		0.12279	0.612549	0.78542		0.98853	0.71955	0.0846509		0.988184	0.571593	0.0483148		0.731049	1	0.237203
		-0.688297	-0.290531	0.0448041		-0.687404	0.237061	0.387749		-0.98804	-1	1		0.0150446	0.463673	0.0328807		0.0162874	0.795561	0.103341		-0.697189	-0.689346	0.992618		0.709573	0.913783	0.158742		0.710437	0.849888	0.121173		0.133216	0.633039	0.779716		0.98853	0.717871	0.0852677		0.988335	0.574245	0.0474485		0.738175	1	0.228048
		-0.683825	-0.285214	0.0455429		-0.682927	0.241591	0.366585		-0.987631	-1	1		0.0212548	0.46906	0.0333097		0.0224975	0.793775	0.10371		-0.689388	-0.675014	0.992921		0.713884	0.915286	0.159158		0.714742	0.846664	0.119963		0.143611	0.653344	0.774084		0.988532	0.716149	0.0859249		0.988447	0.576805	0.0461169		0.745204	1	0.218476
		-0.679326	-0.279887	0.0462698		-0.678423	0.245971	0.345792		-0.987103	-1	1		0.0274642	0.474424	0.0338021		0.0287067	0.792055	0.103965		-0.681514	-0.660681	0.993181		0.718166	0.916746	0.159571		0.719019	0.843432	0.119194		0.153975	0.672906	0.768627		0.988532	0.714384	0.0866156		0.988521	0.579331	0.0442466		0.752138	1	0.208585
		-0.6748	-0.274551	0.0469961		-0.673892	0.250236	0.325478		-0.986458	-1	1		0.0336725	0.479766	0.0343616		0.0349148	0.790445	0.104148		-0.673567	-0.646349	0.993381		0.72242	0.918166	0.159976		0.723267	0.840185	0.118759		0.164306	0.692469	0.763455		0.988536	0.712573	0.0873336		0.988555	0.581806	0.0417899		0.758975	1	0.198481
		-0.670248	-0.26921	0.0477306		-0.669334	0.254427	0.305744		-0.985695	-1	1		0.0398795	0.485088	0.0349903		0.0411214	0.788897	0.104309		-0.66555	-0.632017	0.9935		0.726646	0.919546	0.160372		0.727487	0.836935	0.118541		0.174602	0.712031	0.758677		0.988511	0.710713	0.0880731		0.98855	0.584217	0.0387259		0.765716	1	0.188273
		-0.665669	-0.263865	0.0484795		-0.66475	0.258433	0.28668		-0.984817	-1	1		0.0460849	0.490388	0.0356881		0.0473265	0.787484	0.104504		-0.657462	-0.616647	0.993514		0.730843	0.920889	0.160757		0.731678	0.83368	0.118425		0.184864	0.731593	0.754393		0.988269	0.708801	0.0888292		0.988506	0.586596	0.0350573		0.772359	1	0.178072
		-0.661064	-0.258515	0.0492453		-0.66014	0.262367	0.268364		-0.983823	-1	1		0.0522885	0.495667	0.0364526		0.0535297	0.78619	0.104785		-0.649307	-0.600586	0.993398		0.735011	0.922195	0.161128		0.73584	0.830422	0.11831		0.195089	0.751156	0.75069		0.987982	0.706834	0.0895986		0.988423	0.588911	0.0308064		0.778905	1	0.167984
		-0.656432	-0.25316	0.0500271		-0.655503	0.266192	0.250852		-0.982714	-1	1		0.05849	0.500922	0.0372786		0.0597308	0.784976	0.105197		-0.641084	-0.584525	0.993121		0.73915	0.923463	0.161483		0.739974	0.827161	0.118124		0.205276	0.770718	0.747634		0.987715	0.704808	0.0903797		0.988302	0.591175	0.0260129		0.785354	1	0.158097
		-0.651775	-0.247798	0.0508205		-0.650841	0.269872	0.23418		-0.981491	-1	1		0.0646893	0.506153	0.0381587		0.0659295	0.783983	0.105771		-0.632796	-0.568464	0.992652		0.74326	0.924694	0.161821		0.744078	0.823895	0.117825		0.215424	0.789191	0.745267		0.987137	0.70272	0.0911729		0.988141	0.593407	0.0207335		0.791704	1	0.148471
		-0.647092	-0.242429	0.051618		-0.646153	0.273478	0.21836		-0.980155	-1	1		0.0708859	0.511362	0.0390842		0.0721256	0.783087	0.106524		-0.624443	-0.552403	0.991955		0.74734	0.925886	0.162142		0.748152	0.820623	0.1174		0.225533	0.807391	0.74361		0.986685	0.700567	0.0919799		0.987941	0.595551	0.0150427		0.797955	1	0.139123
		-0.642384	-0.237052	0.0524097		-0.641439	0.276936	0.203383		-0.978707	-1	1.00001		0.0770798	0.516547	0.0400457		0.0783189	0.782334	0.107458		-0.616027	-0.536342	0.990994		0.751391	0.927039	0.162445		0.752197	0.817346	0.116863		0.2356	0.825592	0.742661		0.986403	0.698346	0.0928028		0.987702	0.597661	0.0090348		0.804108	1	0.13003
		-0.63765	-0.231667	0.0531845		-0.6367	0.28028	0.189221		-0.977148	-1	1.00001		0.0832706	0.52171	0.0410339		0.084509	0.781784	0.108566		-0.60755	-0.519964	0.989729		0.755413	0.92815	0.162731		0.756213	0.814057	0.116242		0.245625	0.843792	0.742399		0.985799	0.696055	0.0936437		0.987424	0.599718	0.00282158		0.810162	1	0.121124
		-0.632891	-0.22627	0.0539302		-0.631936	0.283547	0.175824		-0.975477	-1	1.00001		0.0894581	0.526854	0.0420402		0.0906959	0.781339	0.109834		-0.599012	-0.50232	0.988119		0.759404	0.929219	0.163001		0.760198	0.810764	0.115574		0.255606	0.861993	0.742786		0.985287	0.69369	0.0945041		0.987107	0.601708	-0.00347293		0.816116	1	0.112313
		-0.628107	-0.220864	0.0546344		-0.627148	0.286619	0.163133		-0.973697	-1	1.00001		0.0956421	0.531981	0.0430564		0.0968791	0.781109	0.111245		-0.590415	-0.484676	0.986124		0.763366	0.930245	0.163254		0.764154	0.807466	0.114896		0.265543	0.880193	0.743762		0.984765	0.691249	0.0953836		0.986751	0.603665	-0.0097194		0.821969	1	0.10349
		-0.623299	-0.215447	0.0552854		-0.622334	0.289614	0.151079		-0.971807	-1	1.00001		0.101822	0.537093	0.0440748		0.103059	0.781049	0.112781		-0.58176	-0.467031	0.983703		0.767297	0.931227	0.163488		0.768079	0.804165	0.114239		0.275434	0.897664	0.745248		0.984032	0.688727	0.09628		0.986357	0.605556	-0.0157886		0.827723	1	0.0945561
		-0.618465	-0.210022	0.0558731		-0.617496	0.292492	0.139591		-0.969809	-1	1.00001		0.107999	0.54219	0.0450876		0.109234	0.781103	0.114427		-0.573049	-0.449387	0.980816		0.771198	0.932169	0.163701		0.771974	0.800863	0.113628		0.285278	0.91404	0.74715		0.983459	0.686123	0.0971887		0.985923	0.607398	-0.0215568		0.833376	1	0.0854313
		-0.613608	-0.204589	0.0563899		-0.612633	0.295218	0.128605		-0.967703	-1	1.00001		0.11417	0.547273	0.0460879		0.115405	0.781456	0.116162		-0.564284	-0.431743	0.977429		0.775069	0.933071	0.163888		0.775839	0.797561	0.113083		0.295074	0.930415	0.749357		0.98281	0.683434	0.0981026		0.98545	0.609207	-0.0269124		0.838928	1	0.0760647
		-0.608726	-0.19915	0.0568309		-0.607746	0.29787	0.118065		-0.96549	-1	1.00001		0.120338	0.552345	0.0470703		0.121571	0.781933	0.117954		-0.555464	-0.414099	0.97351		0.778909	0.933934	0.164046		0.779673	0.794259	0.112621		0.304823	0.946791	0.751748		0.981971	0.680657	0.0990125		0.984939	0.610931	-0.0317627		0.844378	1	0.0664471
		-0.60382	-0.193703	0.0571942		-0.602835	0.300378	0.107929		-0.963171	-1	1.00001		0.126501	0.557404	0.0480318		0.127733	0.782596	0.119753		-0.546592	-0.395405	0.969036		0.782718	0.93476	0.164169		0.783476	0.790957	0.112251		0.314523	0.963167	0.754195		0.981185	0.677789	0.0999073		0.984388	0.612618	-0.0360385		0.849727	1	0.0566243
		-0.59889	-0.188248	0.0574806		-0.597901	0.302783	0.0981657		-0.960747	-1	1.00001		0.132658	0.562453	0.0489719		0.13389	0.783513	0.121493		-0.53767	-0.376448	0.963991		0.786497	0.935549	0.164256		0.787248	0.787651	0.111978		0.324173	0.979543	0.756567		0.980388	0.674827	0.100775		0.983799	0.61425	-0.0396951		0.854974	1	0.0467041
		-0.593936	-0.182783	0.0576933		-0.592943	0.30512	0.0887539		-0.958218	-1	1.00001		0.138811	0.567491	0.0498928		0.140041	0.784557	0.123097		-0.528697	-0.357492	0.958374		0.790244	0.936302	0.164301		0.790989	0.784341	0.111799		0.333773	0.995919	0.758735		0.979478	0.67177	0.101601		0.983171	0.615803	-0.0427101		0.860118	1	0.0368551
		-0.588959	-0.177308	0.0578366		-0.587961	0.307292	0.0796841		-0.955586	-0.999794	1.00001		0.144958	0.572518	0.0507985		0.146187	0.785854	0.12449		-0.519677	-0.338535	0.952189		0.79396	0.93702	0.164303		0.794699	0.781022	0.111695		0.343321	0.996556	0.760577		0.978681	0.668613	0.102375		0.982504	0.617315	-0.0450796		0.865159	1	0.0272918
		-0.583959	-0.171823	0.057916		-0.582956	0.309401	0.0709583		-0.95285	-0.99928	1.00001		0.151099	0.577534	0.0516942		0.152327	0.787339	0.125606		-0.51061	-0.319578	0.945441		0.797645	0.937701	0.164258		0.798378	0.777685	0.111636		0.352818	0.997194	0.761985		0.977781	0.665358	0.103082		0.981798	0.618745	-0.0468133		0.870097	1	0.0182514
		-0.578936	-0.166329	0.0579375		-0.577928	0.311414	0.0625901		-0.950012	-0.998766	1.00001		0.157234	0.582537	0.0525864		0.158461	0.788948	0.126402		-0.501497	-0.300622	0.93812		0.801299	0.938348	0.164166		0.802025	0.774335	0.111577		0.362263	0.997832	0.762865		0.9767	0.662001	0.103712		0.981054	0.620113	-0.0479298		0.874932	1	0.00996847
		-0.57389	-0.160825	0.0579075		-0.572878	0.313303	0.0546025		-0.947073	-0.998252	1		0.163363	0.587528	0.0534823		0.164589	0.79086	0.126855		-0.492339	-0.281294	0.930192		0.80492	0.93896	0.164025		0.80564	0.770957	0.111467		0.371654	0.998469	0.76314		0.975802	0.658544	0.104255		0.980271	0.62144	-0.0484523		0.879663	1	0.0026542
		-0.568821	-0.155314	0.057833		-0.567804	0.315131	0.0470255		-0.944033	-0.997737	1		0.169486	0.592508	0.0543889		0.17071	0.792887	0.126964		-0.483139	-0.261411	0.921584		0.80851	0.939538	0.163836		0.809224	0.767553	0.111252		0.380992	0.999107	0.76274		0.974731	0.654986	0.104703		0.979449	0.622666	-0.048408		0.884291	1	-0.00352256
		-0.56373	-0.149794	0.0577206		-0.562709	0.316843	0.0398927		-0.940893	-0.997223	0.999999		0.175602	0.597476	0.0553118		0.176825	0.795087	0.126744		-0.473898	-0.241528	0.912192		0.812068	0.940083	0.163598		0.812775	0.76413	0.110892		0.390274	0.999745	0.761596		0.973572	0.651329	0.10505		0.978588	0.62385	-0.047827		0.888816	1	-0.00844949
		-0.558616	-0.144265	0.0575768		-0.557591	0.318472	0.0332369		-0.937654	-0.996709	0.999994		0.181711	0.602433	0.056255		0.182932	0.7975	0.126217		-0.464616	-0.221645	0.901887		0.815594	0.940594	0.163312		0.816295	0.760654	0.110368		0.399502	1	0.759634		0.972544	0.647572	0.105294		0.977689	0.624974	-0.0467429		0.893238	1	-0.0120806
[truncated: 1,335 more rows]

## Sheet: Figure2C
		2 Hz																		16 Hz																		64 Hz
[truncated: 402 more rows]
[truncated: 5 more columns]

## Sheet: Figure2D
		Invariance
		beat frequency	single unit firing rate		correlation
			mean	SE	mean	SE
		1	0.261135	0.00231067	0.689222	0.00668025
[truncated: 7 more rows]

[truncated: 1 more sheets: Figure2E]
