# Supplementary material for: Stimulus background influences phase invariant coding by correlated neural activity
Source: eLife. 2017 Mar 18;6:e24482. doi: 10.7554/eLife.24482 (PMC5389862; doi:10.7554/eLife.24482)
Supplement: Figure 3—figure supplement 1—source data 1. — DOI: http://dx.doi.org/10.7554/eLife.24482.013 [file elife-24482-fig3-figsupp1-data1.xlsx]

## Sheet: Figure 3 supp fig 1 A
		Probability
		Beat Frequency (Hz)
	Frequency (Hz)	1	2	4	8	16	32	64	128
	10	0.123626	0.191956	0.172859	0.0305344	0.0394973	0.0924658	0.0245902	0.422222
	22.2222	0.162088	0.243144	0.292407	0.358779	0.409336	0.315068	0.434426	0.288889
	34.4444	0.337225	0.127971	0.200323	0.166667	0.2693	0.238014	0.401639	0.111111
	46.6667	0.263736	0.23766	0.263328	0.28117	0.213645	0.231164	0.0655738	0.0777778
	58.8889	0.0831044	0.149909	0.0581583	0.145038	0.0466786	0.0976027	0.0655738	0.0666667
	71.1111	0.0247253	0.0457038	0.0129241	0.0152672	0.0179533	0.0222603	0.00819672	0.0333333
	83.3333	0.00549451	0.00365631	0	0.00254453	0.00179533	0.00171233	0	0
	95.5556	0	0	0	0	0.00179533	0.00171233	0	0
	107.778	0	0	0	0	0	0	0	0
	120	0	0	0	0	0	0	0	0

## Sheet: Figure 3 supp fig 1 B
		Probability
		Beat Frequency (Hz)
	Duration (ms)	1	2	4	8	16	32	64	128
	0	0	0	0	0	0	0	0	0
	0.612245	0	0	0	0	0	0	0	0
	1.22449	0	0	0	0	0	0	0	0
	1.83673	0	0	0	0	0	0	0	0
	2.44898	0	0	0	0	0	0	0	0
	3.06122	0	0	0	0	0	0	0	0
	3.67347	0	0	0	0	0	0	0	0
	4.28571	0	0	0	0	0	0	0	0
	4.89796	0	0	0	0	0	0	0	0
	5.5102	0	0	0	0	0	0	0	0
	6.12245	0.000687285	0	0	0	0	0	0	0
	6.73469	0	0	0	0	0	0	0	0
	7.34694	0	0	0	0	0	0.00171233	0	0
	7.95918	0	0	0	0	0	0	0	0.0111111
	8.57143	0	0	0	0	0	0	0.0163934	0
	9.18367	0	0	0	0	0	0.00342466	0	0
	9.79592	0	0	0	0	0	0.00342466	0	0
	10.4082	0.00137457	0.00182815	0	0	0.00179533	0.0171233	0.0327869	0.0555556
	11.0204	0	0.00365631	0	0	0.00179533	0.00856164	0.0409836	0.0222222
	11.6327	0.00137457	0	0	0	0	0.015411	0	0.0666667
	12.2449	0.00206186	0.00182815	0	0	0.00179533	0.00171233	0	0.222222
	12.8571	0.0453608	0.0274223	0.0161551	0.0165394	0.00179533	0.00513699	0.0163934	0.0555556
	13.4694	0.264605	0.109689	0.227787	0.0979644	0.109515	0.109589	0.0819672	0.0666667
	14.0816	0.272852	0.301645	0.357027	0.24173	0.238779	0.337329	0.352459	0.144444
	14.6939	0.17457	0.290676	0.216478	0.288804	0.289048	0.27226	0.270492	0.166667
	15.3061	0.0969072	0.171846	0.119548	0.203562	0.231598	0.159247	0.114754	0.0777778
	15.9184	0.0563574	0.0585009	0.0403877	0.113232	0.0915619	0.0428082	0.0409836	0.0666667
	16.5306	0.0316151	0.0219378	0.0161551	0.0318066	0.021544	0.0119863	0.0163934	0.0111111
	17.1429	0.0268041	0.00914077	0.00646204	0.00508906	0.00897666	0.00684932	0.0163934	0
	17.7551	0.0137457	0.00182815	0	0	0.00179533	0.00342466	0	0.0111111
	18.3673	0.00412371	0	0	0.00127226	0	0	0	0.0111111
	18.9796	0.000687285	0	0	0	0	0	0	0
	19.5918	0.000687285	0	0	0	0	0	0	0
	20.2041	0	0	0	0	0	0	0	0.0111111
	20.8163	0.00206186	0	0	0	0	0	0	0
	21.4286	0.000687285	0	0	0	0	0	0	0
	22.0408	0	0	0	0	0	0	0	0
	22.6531	0.000687285	0	0	0	0	0	0	0
	23.2653	0	0	0	0	0	0	0	0
	23.8776	0	0	0	0	0	0	0	0
	24.4898	0.000687285	0	0	0	0	0	0	0
	25.102	0	0	0	0	0	0	0	0
	25.7143	0.000687285	0	0	0	0	0	0	0
	26.3265	0	0	0	0	0	0	0	0
	26.9388	0	0	0	0	0	0	0	0
	27.551	0	0	0	0	0	0	0	0
	28.1633	0	0	0	0	0	0	0	0
	28.7755	0.00137457	0	0	0	0	0	0	0
	29.3878	0	0	0	0	0	0	0	0
	30	0	0	0	0	0	0	0	0
