# Supplementary material for: Stimulus background influences phase invariant coding by correlated neural activity
Source: eLife. 2017 Mar 18;6:e24482. doi: 10.7554/eLife.24482 (PMC5389862; doi:10.7554/eLife.24482)
Supplement: Figure 3—source data 1. — DOI: http://dx.doi.org/10.7554/eLife.24482.011 [file elife-24482-fig3-data1.xlsx]

## Sheet: Figure_3B
				Chirp Rate
		time		2 Hz									16 Hz									64 Hz
				Phase 1	Phase 2	Phase 3	Phase 4	Phase 5	Phase 6	Phase 7	Phase 8		Phase 1	Phase 2	Phase 3	Phase 4	Phase 5	Phase 6	Phase 7	Phase 8		Phase 1	Phase 2	Phase 3	Phase 4	Phase 5	Phase 6	Phase 7	Phase 8
		0		-0.000110362	-0.000181022	0.00103405	0.000997219	-0.000253882	-0.000145612	0.00031758	0.000663556		0.000698853	2.04e-06	0.000669284	0.00113914	0.000670035	-4.05e-07	-6.59e-07	0.00215738		-2.37e-09	1.09e-12	4.26e-12	-6.58e-11	-4.23e-10	-3.34e-13	7.4e-12	2.39e-09
		0.0005		-0.000107087	-0.000185488	0.00106934	0.00104151	-0.00024126	-0.000145299	0.000336037	0.000692398		0.000728994	2.11e-06	0.0006988	0.00117711	0.000699587	-3.94e-07	-6.67e-07	0.00227245		-3.22e-09	1.2e-12	4.45e-12	-6.94e-11	-4.28e-10	-2.89e-13	7.64e-12	2.53e-09
		0.001		-0.000103554	-0.000189969	0.00110514	0.00108676	-0.000227821	-0.000144826	0.000354994	0.000721851		0.000759769	2.18e-06	0.00072895	0.00121561	0.000729776	-3.82e-07	-6.75e-07	0.00239044		-4.09e-09	1.3e-12	4.64e-12	-7.32e-11	-4.33e-10	-2.41e-13	7.89e-12	2.69e-09
		0.0015		-9.98e-05	-0.000194462	0.00114146	0.00113297	-0.000213541	-0.000144184	0.000374454	0.000751913		0.000791174	2.25e-06	0.000759736	0.00125464	0.0007606	-3.68e-07	-6.83e-07	0.00251139		-5.01e-09	1.42e-12	4.84e-12	-7.7e-11	-4.37e-10	-1.9e-13	8.14e-12	2.84e-09
		0.002		-9.57e-05	-0.000198963	0.00117828	0.00118014	-0.000198398	-0.000143368	0.00039442	0.000782583		0.000823209	2.32e-06	0.000791152	0.00129418	0.000792056	-3.54e-07	-6.9e-07	0.00263529		-5.95e-09	1.53e-12	5.04e-12	-8.08e-11	-4.41e-10	-1.38e-13	8.39e-12	3e-09
		0.0025		-9.13e-05	-0.000203467	0.00121558	0.00122826	-0.000182366	-0.00014237	0.000414894	0.000813855		0.000855867	2.39e-06	0.000823198	0.00133421	0.000824143	-3.39e-07	-6.97e-07	0.00276217		-6.94e-09	1.65e-12	5.25e-12	-8.48e-11	-4.45e-10	-8.23e-14	8.65e-12	3.16e-09
		0.003		-8.67e-05	-0.000207971	0.00125334	0.00127732	-0.000165421	-0.000141184	0.000435881	0.000845727		0.000889146	2.46e-06	0.000855869	0.00137471	0.000856855	-3.23e-07	-7.04e-07	0.00289201		-7.97e-09	1.77e-12	5.46e-12	-8.89e-11	-4.49e-10	-2.43e-14	8.91e-12	3.33e-09
		0.0035		-8.18e-05	-0.000212469	0.00129156	0.00132733	-0.00014754	-0.0001398	0.000457381	0.000878194		0.000923039	2.53e-06	0.00088916	0.00141566	0.000890188	-3.06e-07	-7.1e-07	0.00302484		-9.03e-09	1.9e-12	5.68e-12	-9.31e-11	-4.53e-10	3.63e-14	9.17e-12	3.5e-09
		0.004		-7.65e-05	-0.000216958	0.00133021	0.00137827	-0.000128698	-0.000138213	0.000479395	0.000911249		0.00095754	2.61e-06	0.000923066	0.00145704	0.000924137	-2.87e-07	-7.16e-07	0.00316065		-1.01e-08	2.03e-12	5.9e-12	-9.74e-11	-4.56e-10	9.96e-14	9.44e-12	3.68e-09
		0.0045		-7.09e-05	-0.000221431	0.00136928	0.00143013	-0.000108869	-0.000136414	0.000501927	0.000944886		0.000992642	2.68e-06	0.00095758	0.00149883	0.000958696	-2.68e-07	-7.21e-07	0.00329944		-1.13e-08	2.16e-12	6.12e-12	-1.02e-10	-4.59e-10	1.66e-13	9.71e-12	3.86e-09
		0.005		-6.51e-05	-0.000225884	0.00140873	0.0014829	-8.8e-05	-0.000134396	0.000524975	0.000979098		0.00102834	2.76e-06	0.000992697	0.00154101	0.000993857	-2.47e-07	-7.26e-07	0.00344121		-1.25e-08	2.3e-12	6.35e-12	-1.06e-10	-4.61e-10	2.35e-13	9.98e-12	4.05e-09
		0.0055		-5.88e-05	-0.000230311	0.00144856	0.00153657	-6.62e-05	-0.000132151	0.00054854	0.00101388		0.00106462	2.83e-06	0.00102841	0.00158355	0.00102961	-2.25e-07	-7.31e-07	0.00358595		-1.37e-08	2.44e-12	6.58e-12	-1.11e-10	-4.63e-10	3.06e-13	1.02e-11	4.24e-09
		0.006		-5.23e-05	-0.000234707	0.00148873	0.00159114	-4.32e-05	-0.00012967	0.000572623	0.00104921		0.00110147	2.91e-06	0.0010647	0.00162642	0.00106595	-2.02e-07	-7.34e-07	0.00373363		-1.49e-08	2.58e-12	6.81e-12	-1.15e-10	-4.65e-10	3.81e-13	1.05e-11	4.43e-09
		0.0065		-4.54e-05	-0.000239066	0.00152923	0.00164657	-1.92e-05	-0.000126945	0.000597221	0.00108509		0.00113888	2.99e-06	0.00110157	0.0016696	0.00110287	-1.78e-07	-7.38e-07	0.00388427		-1.62e-08	2.73e-12	7.05e-12	-1.2e-10	-4.67e-10	4.59e-13	1.08e-11	4.63e-09
		0.007		-3.81e-05	-0.000243382	0.00157002	0.00170286	5.93e-06	-0.000123969	0.000622335	0.00112151		0.00117685	3.06e-06	0.001139	0.00171306	0.00114035	-1.52e-07	-7.4e-07	0.00403782		-1.76e-08	2.89e-12	7.29e-12	-1.25e-10	-4.68e-10	5.4e-13	1.11e-11	4.83e-09
		0.0075		-3.04e-05	-0.000247648	0.00161109	0.00175999	3.22e-05	-0.000120732	0.000647961	0.00115844		0.00121535	3.14e-06	0.00117698	0.00175676	0.00117838	-1.25e-07	-7.42e-07	0.00419427		-1.9e-08	3.04e-12	7.54e-12	-1.3e-10	-4.68e-10	6.24e-13	1.14e-11	5.04e-09
		0.008		-2.24e-05	-0.000251858	0.00165239	0.00181794	5.96e-05	-0.000117227	0.000674097	0.00119589		0.00125438	3.22e-06	0.0012155	0.00180067	0.00121695	-9.68e-08	-7.44e-07	0.0043536		-2.04e-08	3.2e-12	7.79e-12	-1.35e-10	-4.69e-10	7.11e-13	1.16e-11	5.25e-09
		0.0085		-1.4e-05	-0.000256005	0.0016939	0.00187668	8.82e-05	-0.000113444	0.000700741	0.00123383		0.00129391	3.3e-06	0.00125455	0.00184476	0.00125604	-6.72e-08	-7.44e-07	0.00451577		-2.19e-08	3.37e-12	8.04e-12	-1.4e-10	-4.68e-10	8.01e-13	1.19e-11	5.46e-09
		0.009		-5.21e-06	-0.000260082	0.00173558	0.0019362	0.000118065	-0.000109374	0.000727887	0.00127225		0.00133393	3.38e-06	0.0012941	0.001889	0.00129565	-3.61e-08	-7.44e-07	0.00468076		-2.34e-08	3.54e-12	8.3e-12	-1.45e-10	-4.67e-10	8.95e-13	1.22e-11	5.68e-09
		0.0095		4e-06	-0.000264081	0.00177741	0.00199647	0.000149125	-0.000105009	0.000755532	0.00131113		0.00137442	3.45e-06	0.00133414	0.00193333	0.00133574	-3.54e-09	-7.44e-07	0.00484851		-2.5e-08	3.71e-12	8.56e-12	-1.51e-10	-4.66e-10	9.92e-13	1.25e-11	5.91e-09
		0.01		1.36e-05	-0.000267996	0.00181935	0.00205747	0.000181447	-0.00010034	0.000783671	0.00135045		0.00141537	3.53e-06	0.00137465	0.00197773	0.00137631	3.05e-08	-7.42e-07	0.00501899		-2.66e-08	3.89e-12	8.82e-12	-1.56e-10	-4.64e-10	1.09e-12	1.28e-11	6.14e-09
		0.0105		2.37e-05	-0.000271819	0.00186135	0.00211916	0.000215053	-9.54e-05	0.000812297	0.0013902		0.00145675	3.61e-06	0.00141562	0.00202215	0.00141733	6.6e-08	-7.4e-07	0.00519215		-2.83e-08	4.07e-12	9.08e-12	-1.62e-10	-4.62e-10	1.2e-12	1.31e-11	6.37e-09
		0.011		3.41e-05	-0.00027554	0.00190339	0.00218151	0.000249969	-9.01e-05	0.000841403	0.00143035		0.00149853	3.69e-06	0.00145702	0.00206655	0.00145878	1.03e-07	-7.36e-07	0.00536794		-3e-08	4.26e-12	9.35e-12	-1.67e-10	-4.59e-10	1.3e-12	1.33e-11	6.6e-09
		0.0115		4.51e-05	-0.000279153	0.00194541	0.00224449	0.000286219	-8.44e-05	0.000870983	0.00147088		0.00154071	3.77e-06	0.00149883	0.00211088	0.00150065	1.42e-07	-7.32e-07	0.0055463		-3.18e-08	4.45e-12	9.62e-12	-1.73e-10	-4.55e-10	1.42e-12	1.36e-11	6.84e-09
		0.012		5.64e-05	-0.000282647	0.00198737	0.00230807	0.000323827	-7.84e-05	0.000901027	0.00151177		0.00158324	3.85e-06	0.00154102	0.00215511	0.0015429	1.82e-07	-7.27e-07	0.00572716		-3.36e-08	4.64e-12	9.9e-12	-1.79e-10	-4.51e-10	1.53e-12	1.39e-11	7.09e-09
		0.0125		6.83e-05	-0.000286016	0.00202924	0.00237221	0.000362816	-7.21e-05	0.000931527	0.00155299		0.00162611	3.93e-06	0.00158358	0.0021992	0.00158552	2.24e-07	-7.21e-07	0.00591046		-3.54e-08	4.84e-12	1.02e-11	-1.84e-10	-4.46e-10	1.65e-12	1.42e-11	7.34e-09
		0.013		8.06e-05	-0.000289249	0.00207097	0.00243686	0.000403211	-6.54e-05	0.000962473	0.00159451		0.00166928	4e-06	0.00162648	0.00224312	0.00162847	2.68e-07	-7.14e-07	0.00609611		-3.74e-08	5.04e-12	1.05e-11	-1.9e-10	-4.41e-10	1.77e-12	1.45e-11	7.59e-09
		0.0135		9.33e-05	-0.000292336	0.00211252	0.00250201	0.000445034	-5.84e-05	0.000993852	0.00163631		0.00171273	4.08e-06	0.00166968	0.00228682	0.00167173	3.13e-07	-7.06e-07	0.00628405		-3.93e-08	5.25e-12	1.07e-11	-1.96e-10	-4.35e-10	1.9e-12	1.47e-11	7.85e-09
		0.014		0.000106608	-0.000295269	0.00215385	0.0025676	0.000488308	-5.09e-05	0.00102566	0.00167836		0.00175643	4.16e-06	0.00171316	0.00233027	0.00171526	3.6e-07	-6.97e-07	0.00647419		-4.13e-08	5.46e-12	1.1e-11	-2.02e-10	-4.28e-10	2.03e-12	1.5e-11	8.11e-09
		0.0145		0.000120366	-0.000298037	0.00219492	0.0026336	0.000533055	-4.31e-05	0.00105787	0.00172063		0.00180034	4.23e-06	0.00175688	0.00237345	0.00175905	4.09e-07	-6.87e-07	0.00666643		-4.34e-08	5.68e-12	1.13e-11	-2.08e-10	-4.2e-10	2.16e-12	1.53e-11	8.37e-09
		0.015		0.000134627	-0.00030063	0.0022357	0.00269998	0.000579297	-3.49e-05	0.00109047	0.00176308		0.00184443	4.31e-06	0.00180082	0.00241632	0.00180304	4.59e-07	-6.75e-07	0.00686068		-4.55e-08	5.9e-12	1.16e-11	-2.15e-10	-4.12e-10	2.3e-12	1.55e-11	8.64e-09
		0.0155		0.000149401	-0.000303038	0.00227615	0.00276671	0.000627055	-2.62e-05	0.00112346	0.00180567		0.00188865	4.38e-06	0.00184493	0.00245886	0.00184722	5.12e-07	-6.63e-07	0.00705682		-4.76e-08	6.12e-12	1.19e-11	-2.21e-10	-4.03e-10	2.44e-12	1.58e-11	8.91e-09
		0.016		0.000164695	-0.000305248	0.00231625	0.00283376	0.00067635	-1.72e-05	0.00115682	0.00184838		0.00193299	4.46e-06	0.00188919	0.00250104	0.00189154	5.66e-07	-6.49e-07	0.00725475		-4.98e-08	6.35e-12	1.22e-11	-2.27e-10	-3.93e-10	2.58e-12	1.61e-11	9.18e-09
		0.0165		0.000180517	-0.000307252	0.00235595	0.00290109	0.000727201	-7.69e-06	0.00119052	0.00189117		0.00197738	4.53e-06	0.00193355	0.00254283	0.00193596	6.22e-07	-6.34e-07	0.00745436		-5.21e-08	6.58e-12	1.25e-11	-2.34e-10	-3.82e-10	2.73e-12	1.63e-11	9.46e-09
		0.017		0.000196876	-0.000309036	0.00239524	0.00296868	0.000779629	2.23e-06	0.00122455	0.00193399		0.0020218	4.6e-06	0.00197798	0.00258421	0.00198044	6.81e-07	-6.17e-07	0.00765551		-5.44e-08	6.81e-12	1.27e-11	-2.4e-10	-3.7e-10	2.89e-12	1.66e-11	9.74e-09
		0.0175		0.000213779	-0.000310589	0.00243408	0.00303651	0.000833652	1.26e-05	0.00125889	0.0019768		0.00206619	4.67e-06	0.00202242	0.00262516	0.00202495	7.41e-07	-5.99e-07	0.00785807		-5.67e-08	7.05e-12	1.3e-11	-2.47e-10	-3.57e-10	3.04e-12	1.68e-11	1e-08
		0.018		0.000231235	-0.0003119	0.00247245	0.00310453	0.000889288	2.34e-05	0.00129352	0.00201957		0.00211052	4.73e-06	0.00206685	0.00266566	0.00206944	8.03e-07	-5.8e-07	0.0080619		-5.91e-08	7.29e-12	1.33e-11	-2.53e-10	-3.44e-10	3.2e-12	1.71e-11	1.03e-08
		0.0185		0.00024925	-0.000312955	0.00251033	0.00317274	0.000946553	3.47e-05	0.00132842	0.00206226		0.00215475	4.8e-06	0.00211122	0.00270568	0.00211387	8.67e-07	-5.59e-07	0.00826685		-6.16e-08	7.54e-12	1.36e-11	-2.6e-10	-3.29e-10	3.37e-12	1.73e-11	1.06e-08
		0.019		0.000267832	-0.000313742	0.00254769	0.0032411	0.00100547	4.65e-05	0.00136356	0.00210483		0.00219884	4.86e-06	0.00215548	0.00274522	0.0021582	9.33e-07	-5.37e-07	0.00847278		-6.41e-08	7.79e-12	1.39e-11	-2.66e-10	-3.13e-10	3.54e-12	1.75e-11	1.09e-08
		0.0195		0.000286988	-0.000314248	0.00258452	0.00330959	0.00106604	5.88e-05	0.00139892	0.00214725		0.00224275	4.93e-06	0.0021996	0.00278424	0.00220238	1e-06	-5.13e-07	0.00867952		-6.66e-08	8.04e-12	1.42e-11	-2.73e-10	-2.97e-10	3.71e-12	1.78e-11	1.12e-08
		0.02		0.000306725	-0.000314461	0.00262079	0.00337819	0.00112829	7.15e-05	0.00143448	0.00218949		0.00228645	4.99e-06	0.00224355	0.00282275	0.00224639	1.07e-06	-4.88e-07	0.00888693		-6.92e-08	8.3e-12	1.45e-11	-2.8e-10	-2.79e-10	3.89e-12	1.8e-11	1.15e-08
		0.0205		0.000327048	-0.000314365	0.00265648	0.00344688	0.00119223	8.48e-05	0.0014702	0.00223151		0.0023299	5.04e-06	0.00228729	0.00286072	0.00229019	1.14e-06	-4.61e-07	0.00909485		-7.19e-08	8.56e-12	1.48e-11	-2.86e-10	-2.6e-10	4.07e-12	1.82e-11	1.18e-08
		0.021		0.000347965	-0.000313948	0.00269158	0.00351563	0.00125787	9.86e-05	0.00150607	0.00227329		0.00237308	5.1e-06	0.00233078	0.00289814	0.00233374	1.22e-06	-4.32e-07	0.00930314		-7.46e-08	8.82e-12	1.5e-11	-2.93e-10	-2.4e-10	4.26e-12	1.84e-11	1.21e-08
		0.0215		0.000369481	-0.000313195	0.00272608	0.00358442	0.00132522	0.000112904	0.00154204	0.00231481		0.00241595	5.15e-06	0.00237399	0.00293499	0.00237702	1.3e-06	-4.02e-07	0.00951166		-7.73e-08	9.08e-12	1.53e-11	-3e-10	-2.19e-10	4.45e-12	1.86e-11	1.24e-08
		0.022		0.000391602	-0.000312092	0.00275995	0.00365324	0.0013943	0.000127754	0.00157809	0.00235602		0.00245849	5.2e-06	0.0024169	0.00297127	0.00241999	1.37e-06	-3.69e-07	0.00972026		-8.01e-08	9.35e-12	1.56e-11	-3.06e-10	-1.97e-10	4.64e-12	1.87e-11	1.27e-08
		0.0225		0.000414332	-0.000310623	0.00279319	0.00372205	0.0014651	0.00014315	0.00161419	0.00239692		0.00250066	5.25e-06	0.00245948	0.00300697	0.00246263	1.46e-06	-3.35e-07	0.00992881		-8.29e-08	9.62e-12	1.59e-11	-3.13e-10	-1.74e-10	4.84e-12	1.89e-11	1.3e-08
		0.023		0.000437676	-0.000308774	0.00282578	0.00379085	0.00153765	0.0001591	0.00165029	0.00243749		0.00254245	5.29e-06	0.0025017	0.00304208	0.0025049	1.54e-06	-2.99e-07	0.0101372		-8.58e-08	9.9e-12	1.62e-11	-3.2e-10	-1.49e-10	5.04e-12	1.9e-11	1.33e-08
		0.0235		0.00046164	-0.00030653	0.00285771	0.00385961	0.00161193	0.000175615	0.00168637	0.00247769		0.00258383	5.33e-06	0.00254353	0.00307658	0.0025468	1.62e-06	-2.61e-07	0.0103452		-8.87e-08	1.02e-11	1.64e-11	-3.26e-10	-1.23e-10	5.25e-12	1.92e-11	1.36e-08
		0.024		0.000486226	-0.000303874	0.00288898	0.00392831	0.00168797	0.000192703	0.00172239	0.00251752		0.00262478	5.37e-06	0.00258495	0.00311048	0.00258828	1.71e-06	-2.22e-07	0.0105528		-9.17e-08	1.05e-11	1.67e-11	-3.33e-10	-9.62e-11	5.46e-12	1.93e-11	1.39e-08
		0.0245		0.000511439	-0.000300791	0.00291957	0.00399694	0.00176575	0.000210372	0.00175831	0.00255695		0.00266528	5.4e-06	0.00262595	0.00314376	0.00262934	1.8e-06	-1.8e-07	0.0107598		-9.47e-08	1.07e-11	1.69e-11	-3.4e-10	-6.77e-11	5.68e-12	1.94e-11	1.42e-08
		0.025		0.00053728	-0.000297265	0.00294948	0.00406547	0.00184529	0.000228632	0.0017941	0.00259597		0.00270531	5.43e-06	0.00266649	0.00317642	0.00266994	1.89e-06	-1.36e-07	0.010966		-9.78e-08	1.1e-11	1.72e-11	-3.46e-10	-3.78e-11	5.9e-12	1.95e-11	1.45e-08
		0.0255		0.000563754	-0.000293278	0.0029787	0.00413388	0.00192658	0.000247491	0.0018297	0.00263456		0.00274485	5.45e-06	0.00270656	0.00320846	0.00271007	1.99e-06	-8.94e-08	0.0111715		-1.01e-07	1.13e-11	1.74e-11	-3.53e-10	-6.52e-12	6.12e-12	1.96e-11	1.48e-08
		0.026		0.000590861	-0.000288814	0.00300723	0.00420216	0.00200962	0.000266957	0.00186511	0.00267272		0.00278387	5.47e-06	0.00274614	0.00323986	0.0027497	2.09e-06	-4.11e-08	0.011376		-1.04e-07	1.16e-11	1.77e-11	-3.59e-10	2.62e-11	6.35e-12	1.97e-11	1.51e-08
		0.0265		0.000618603	-0.000283856	0.00303506	0.00427029	0.0020944	0.000287037	0.00190028	0.00271043		0.00282238	5.49e-06	0.00278522	0.00327064	0.00278884	2.18e-06	9.49e-09	0.0115794		-1.07e-07	1.19e-11	1.79e-11	-3.66e-10	6.04e-11	6.58e-12	1.97e-11	1.54e-08
		0.027		0.000646981	-0.000278386	0.00306219	0.00433824	0.00218092	0.000307741	0.00193519	0.00274767		0.00286036	5.5e-06	0.00282378	0.00330078	0.00282745	2.29e-06	6.24e-08	0.0117817		-1.1e-07	1.22e-11	1.82e-11	-3.72e-10	9.6e-11	6.81e-12	1.98e-11	1.57e-08
		0.0275		0.000675996	-0.000272386	0.00308861	0.004406	0.00226917	0.000329074	0.0019698	0.00278445		0.00289778	5.5e-06	0.0028618	0.00333029	0.00286552	2.39e-06	1.18e-07	0.0119827		-1.14e-07	1.25e-11	1.84e-11	-3.78e-10	1.33e-10	7.05e-12	1.98e-11	1.6e-08
		0.028		0.000705646	-0.000265839	0.00311433	0.00447354	0.00235914	0.000351044	0.0020041	0.00282075		0.00293464	5.51e-06	0.00289927	0.00335916	0.00290304	2.5e-06	1.75e-07	0.0121823		-1.17e-07	1.27e-11	1.86e-11	-3.84e-10	1.72e-10	7.29e-12	1.98e-11	1.63e-08
		0.0285		0.000735931	-0.000258726	0.00313934	0.00454085	0.00245081	0.000373658	0.00203807	0.00285657		0.00297092	5.5e-06	0.00293618	0.0033874	0.00294	2.6e-06	2.35e-07	0.0123805		-1.2e-07	1.3e-11	1.88e-11	-3.9e-10	2.12e-10	7.54e-12	1.97e-11	1.65e-08
		0.029		0.000766849	-0.000251029	0.00316365	0.0046079	0.00254418	0.000396922	0.00207168	0.0028919		0.00300663	5.49e-06	0.00297251	0.003415	0.00297639	2.71e-06	2.98e-07	0.0125772		-1.23e-07	1.33e-11	1.9e-11	-3.96e-10	2.54e-10	7.79e-12	1.97e-11	1.68e-08
		0.0295		0.000798398	-0.000242729	0.00318726	0.00467467	0.00263922	0.000420843	0.00210491	0.00292674		0.00304174	5.47e-06	0.00300827	0.00344196	0.00301219	2.83e-06	3.63e-07	0.0127722		-1.27e-07	1.36e-11	1.92e-11	-4.02e-10	2.98e-10	8.04e-12	1.96e-11	1.71e-08
		0.03		0.000830575	-0.000233807	0.00321016	0.00474115	0.00273591	0.000445425	0.00213775	0.00296107		0.00307625	5.45e-06	0.00304343	0.0034683	0.0030474	2.94e-06	4.31e-07	0.0129655		-1.3e-07	1.39e-11	1.93e-11	-4.08e-10	3.43e-10	8.3e-12	1.95e-11	1.74e-08
		0.0305		0.000863374	-0.000224243	0.00323236	0.0048073	0.00283424	0.000470675	0.00217018	0.00299491		0.00311015	5.42e-06	0.00307799	0.003494	0.00308201	3.06e-06	5.01e-07	0.0131569		-1.34e-07	1.42e-11	1.95e-11	-4.13e-10	3.9e-10	8.56e-12	1.94e-11	1.77e-08
		0.031		0.000896793	-0.000214019	0.00325387	0.0048731	0.00293417	0.000496597	0.00220219	0.00302825		0.00314344	5.38e-06	0.00311195	0.00351907	0.003116	3.18e-06	5.74e-07	0.0133465		-1.37e-07	1.45e-11	1.96e-11	-4.18e-10	4.39e-10	8.82e-12	1.93e-11	1.79e-08
		0.0315		0.000930825	-0.000203114	0.00327468	0.00493854	0.00303568	0.000523195	0.00223377	0.00306109		0.00317611	5.34e-06	0.00314529	0.00354351	0.00314938	3.3e-06	6.5e-07	0.0135342		-1.4e-07	1.48e-11	1.98e-11	-4.23e-10	4.89e-10	9.08e-12	1.91e-11	1.82e-08
		0.032		0.000965463	-0.000191509	0.00329481	0.00500358	0.00313873	0.000550473	0.00226491	0.00309343		0.00320815	5.29e-06	0.00317802	0.00356734	0.00318214	3.43e-06	7.28e-07	0.0137198		-1.44e-07	1.5e-11	1.99e-11	-4.28e-10	5.42e-10	9.35e-12	1.89e-11	1.84e-08
		0.0325		0.0010007	-0.000179183	0.00331426	0.00506819	0.0032433	0.000578436	0.0022956	0.00312526		0.00323957	5.23e-06	0.00321012	0.00359054	0.00321428	3.55e-06	8.09e-07	0.0139034		-1.47e-07	1.53e-11	2e-11	-4.33e-10	5.96e-10	9.62e-12	1.87e-11	1.87e-08
		0.033		0.00103653	-0.000166117	0.00333303	0.00513236	0.00334935	0.000607084	0.00232584	0.00315661		0.00327036	5.16e-06	0.00324159	0.00361314	0.00324579	3.68e-06	8.94e-07	0.0140848		-1.51e-07	1.56e-11	2.01e-11	-4.37e-10	6.52e-10	9.9e-12	1.85e-11	1.89e-08
		0.0335		0.00107294	-0.000152289	0.00335113	0.00519605	0.00345684	0.000636422	0.00235561	0.00318746		0.00330051	5.09e-06	0.00327243	0.00363512	0.00327666	3.81e-06	9.81e-07	0.0142639		-1.54e-07	1.59e-11	2.01e-11	-4.42e-10	7.1e-10	1.02e-11	1.82e-11	1.91e-08
		0.034		0.00110992	-0.000137679	0.00336858	0.00525923	0.00356572	0.00066645	0.00238493	0.00321782		0.00333003	5e-06	0.00330264	0.0036565	0.00330689	3.94e-06	1.07e-06	0.0144408		-1.58e-07	1.62e-11	2.02e-11	-4.46e-10	7.69e-10	1.05e-11	1.79e-11	1.94e-08
		0.0345		0.00114746	-0.000122267	0.00338538	0.00532187	0.00367595	0.000697169	0.00241378	0.0032477		0.00335892	4.91e-06	0.00333222	0.00367728	0.00333649	4.08e-06	1.16e-06	0.0146153		-1.61e-07	1.64e-11	2.02e-11	-4.49e-10	8.31e-10	1.07e-11	1.75e-11	1.96e-08
		0.035		0.00118555	-0.000106031	0.00340153	0.00538395	0.00378747	0.000728581	0.00244217	0.0032771		0.00338717	4.81e-06	0.00336116	0.00369747	0.00336545	4.22e-06	1.26e-06	0.0147874		-1.65e-07	1.67e-11	2.03e-11	-4.53e-10	8.95e-10	1.1e-11	1.72e-11	1.98e-08
		0.0355		0.00122417	-8.9e-05	0.00341705	0.00544542	0.00390024	0.000760684	0.00247009	0.00330602		0.00341478	4.7e-06	0.00338947	0.00371708	0.00339378	4.35e-06	1.36e-06	0.0149571		-1.68e-07	1.69e-11	2.03e-11	-4.56e-10	9.6e-10	1.13e-11	1.68e-11	2e-08
		0.036		0.00126331	-7.1e-05	0.00343195	0.00550625	0.0040142	0.000793478	0.00249756	0.00333449		0.00344176	4.58e-06	0.00341714	0.00373611	0.00342146	4.5e-06	1.46e-06	0.0151242		-1.72e-07	1.72e-11	2.02e-11	-4.59e-10	1.03e-09	1.16e-11	1.63e-11	2.01e-08
		0.0365		0.00130296	-5.22e-05	0.00344624	0.00556642	0.00412928	0.000826961	0.00252458	0.00336249		0.00346811	4.45e-06	0.00344418	0.00375456	0.00344851	4.64e-06	1.57e-06	0.0152889		-1.75e-07	1.74e-11	2.02e-11	-4.61e-10	1.1e-09	1.19e-11	1.58e-11	2.03e-08
		0.037		0.00134309	-3.24e-05	0.00345992	0.00562588	0.00424542	0.00086113	0.00255115	0.00339005		0.00349383	4.3e-06	0.00347059	0.00377245	0.00347492	4.78e-06	1.68e-06	0.0154509		-1.78e-07	1.77e-11	2.01e-11	-4.63e-10	1.17e-09	1.22e-11	1.53e-11	2.05e-08
		0.0375		0.00138368	-1.18e-05	0.00347302	0.00568461	0.00436255	0.000895983	0.00257728	0.00341717		0.00351892	4.15e-06	0.00349636	0.00378978	0.0035007	4.93e-06	1.79e-06	0.0156103		-1.82e-07	1.79e-11	2e-11	-4.65e-10	1.24e-09	1.25e-11	1.48e-11	2.06e-08
		0.038		0.00142473	9.86e-06	0.00348554	0.00574257	0.00448061	0.000931515	0.00260298	0.00344386		0.00354339	3.99e-06	0.00352151	0.00380656	0.00352584	5.08e-06	1.9e-06	0.0157671		-1.85e-07	1.82e-11	1.99e-11	-4.67e-10	1.32e-09	1.27e-11	1.42e-11	2.07e-08
		0.0385		0.0014662	3.25e-05	0.0034975	0.00579975	0.0045995	0.00096772	0.00262826	0.00347013		0.00356723	3.81e-06	0.00354603	0.0038228	0.00355035	5.23e-06	2.02e-06	0.0159213		-1.89e-07	1.84e-11	1.98e-11	-4.68e-10	1.4e-09	1.3e-11	1.35e-11	2.08e-08
		0.039		0.00150808	5.6e-05	0.00350891	0.00585611	0.00471915	0.00100459	0.00265314	0.00349599		0.00359046	3.63e-06	0.00356994	0.0038385	0.00357425	5.38e-06	2.14e-06	0.0160727		-1.92e-07	1.86e-11	1.96e-11	-4.68e-10	1.48e-09	1.33e-11	1.28e-11	2.09e-08
		0.0395		0.00155034	8.07e-05	0.00351978	0.00591163	0.00483948	0.00104213	0.00267762	0.00352145		0.00361307	3.43e-06	0.00359322	0.00385368	0.00359751	5.53e-06	2.27e-06	0.0162215		-1.95e-07	1.88e-11	1.94e-11	-4.68e-10	1.56e-09	1.36e-11	1.21e-11	2.1e-08
		0.04		0.00159295	0.000106291	0.00353013	0.0059663	0.00496039	0.00108032	0.00270173	0.00354653		0.00363508	3.22e-06	0.00361589	0.00386834	0.00362016	5.68e-06	2.4e-06	0.0163675		-1.98e-07	1.9e-11	1.92e-11	-4.68e-10	1.64e-09	1.39e-11	1.13e-11	2.11e-08
		0.0405		0.00163589	0.000132988	0.00353998	0.0060201	0.00508179	0.00111915	0.00272547	0.00357123		0.00365648	2.99e-06	0.00363796	0.00388248	0.0036422	5.84e-06	2.53e-06	0.0165109		-2.01e-07	1.92e-11	1.9e-11	-4.67e-10	1.73e-09	1.42e-11	1.05e-11	2.11e-08
		0.041		0.00167913	0.000160764	0.00354933	0.006073	0.0052036	0.00115862	0.00274887	0.00359558		0.00367729	2.76e-06	0.00365942	0.00389613	0.00366363	5.99e-06	2.67e-06	0.0166515		-2.04e-07	1.93e-11	1.87e-11	-4.66e-10	1.82e-09	1.45e-11	9.66e-12	2.11e-08
		0.0415		0.00172264	0.000189639	0.00355821	0.00612501	0.00532572	0.00119871	0.00277194	0.00361957		0.00369751	2.5e-06	0.00368029	0.00390928	0.00368445	6.15e-06	2.81e-06	0.0167894		-2.07e-07	1.95e-11	1.84e-11	-4.64e-10	1.91e-09	1.48e-11	8.75e-12	2.11e-08
		0.042		0.00176639	0.000219635	0.00356662	0.00617609	0.00544809	0.00123941	0.00279471	0.00364323		0.00371714	2.24e-06	0.00370056	0.00392195	0.00370468	6.31e-06	2.95e-06	0.0169246		-2.1e-07	1.96e-11	1.8e-11	-4.61e-10	2e-09	1.5e-11	7.79e-12	2.11e-08
		0.0425		0.00181034	0.000250772	0.0035746	0.00622625	0.00557061	0.00128071	0.00281718	0.00366657		0.0037362	1.96e-06	0.00372025	0.00393415	0.00372432	6.47e-06	3.09e-06	0.0170571		-2.13e-07	1.98e-11	1.76e-11	-4.58e-10	2.1e-09	1.53e-11	6.77e-12	2.1e-08
		0.043		0.00185446	0.000283071	0.00358215	0.00627548	0.00569321	0.0013226	0.0028394	0.00368961		0.00375468	1.67e-06	0.00373936	0.00394587	0.00374337	6.63e-06	3.24e-06	0.0171869		-2.16e-07	1.99e-11	1.72e-11	-4.54e-10	2.2e-09	1.56e-11	5.7e-12	2.1e-08
		0.0435		0.00189872	0.000316551	0.00358929	0.00632376	0.00581581	0.00136505	0.00286137	0.00371235		0.00377261	1.36e-06	0.0037579	0.00395714	0.00376185	6.79e-06	3.4e-06	0.017314		-2.19e-07	2e-11	1.68e-11	-4.5e-10	2.3e-09	1.59e-11	4.58e-12	2.09e-08
		0.044		0.00194306	0.000351232	0.00359604	0.0063711	0.00593833	0.00140806	0.00288313	0.00373482		0.00378997	1.03e-06	0.00377588	0.00396796	0.00377975	6.95e-06	3.55e-06	0.0174384		-2.21e-07	2.01e-11	1.63e-11	-4.45e-10	2.4e-09	1.62e-11	3.4e-12	2.08e-08
		0.0445		0.00198747	0.000387135	0.00360241	0.00641749	0.00606072	0.00145159	0.00290469	0.00375703		0.00380678	6.95e-07	0.00379329	0.00397835	0.00379709	7.11e-06	3.71e-06	0.0175602		-2.24e-07	2.01e-11	1.58e-11	-4.4e-10	2.5e-09	1.64e-11	2.16e-12	2.06e-08
		0.045		0.00203188	0.000424278	0.00360843	0.00646293	0.00618289	0.00149564	0.00292609	0.00377898		0.00382306	3.39e-07	0.00381016	0.0039883	0.00381387	7.27e-06	3.88e-06	0.0176793		-2.26e-07	2.02e-11	1.52e-11	-4.33e-10	2.61e-09	1.67e-11	8.7e-13	2.05e-08
		0.0455		0.00207626	0.00046268	0.00361412	0.00650741	0.00630479	0.00154018	0.00294735	0.00380071		0.0038388	-3.33e-08	0.00382649	0.00399783	0.0038301	7.43e-06	4.05e-06	0.0177958		-2.28e-07	2.02e-11	1.46e-11	-4.26e-10	2.72e-09	1.69e-11	-4.84e-13	2.03e-08
		0.046		0.00212057	0.00050236	0.00361949	0.00655095	0.00642634	0.00158519	0.00296851	0.00382223		0.00385401	-4.23e-07	0.00384228	0.00400695	0.00384579	7.59e-06	4.22e-06	0.0179098		-2.3e-07	2.03e-11	1.4e-11	-4.19e-10	2.83e-09	1.72e-11	-1.9e-12	2e-08
		0.0465		0.00216477	0.000543336	0.00362457	0.00659354	0.00654747	0.00163065	0.00298958	0.00384354		0.00386871	-8.29e-07	0.00385754	0.00401566	0.00386094	7.75e-06	4.39e-06	0.0180211		-2.32e-07	2.03e-11	1.33e-11	-4.1e-10	2.94e-09	1.74e-11	-3.38e-12	1.98e-08
		0.047		0.00220881	0.000585625	0.00362937	0.00663518	0.00666814	0.00167652	0.00301061	0.00386467		0.0038829	-1.25e-06	0.00387229	0.00402398	0.00387556	7.91e-06	4.57e-06	0.01813		-2.34e-07	2.02e-11	1.25e-11	-4.01e-10	3.06e-09	1.77e-11	-4.92e-12	1.95e-08
		0.0475		0.00225266	0.000629244	0.00363392	0.00667588	0.00678828	0.00172279	0.00303162	0.00388564		0.00389659	-1.7e-06	0.00388652	0.00403192	0.00388967	8.07e-06	4.75e-06	0.0182363		-2.36e-07	2.02e-11	1.18e-11	-3.9e-10	3.18e-09	1.79e-11	-6.52e-12	1.92e-08
		0.048		0.00229629	0.000674209	0.00363823	0.00671565	0.00690782	0.00176942	0.00305264	0.00390645		0.00390978	-2.16e-06	0.00390026	0.00403948	0.00390327	8.22e-06	4.93e-06	0.0183402		-2.37e-07	2.01e-11	1.09e-11	-3.79e-10	3.3e-09	1.82e-11	-8.2e-12	1.88e-08
		0.0485		0.00233966	0.000720537	0.00364233	0.0067545	0.00702671	0.00181641	0.00307372	0.00392714		0.0039225	-2.64e-06	0.0039135	0.00404668	0.00391636	8.38e-06	5.12e-06	0.0184416		-2.39e-07	2e-11	1e-11	-3.68e-10	3.42e-09	1.84e-11	-9.94e-12	1.84e-08
		0.049		0.00238274	0.000768242	0.00364623	0.00679243	0.0071449	0.00186372	0.00309488	0.0039477		0.00393474	-3.13e-06	0.00392625	0.00405352	0.00392896	8.54e-06	5.31e-06	0.0185406		-2.4e-07	1.99e-11	9.11e-12	-3.55e-10	3.54e-09	1.86e-11	-1.17e-11	1.8e-08
		0.0495		0.0024255	0.000817339	0.00364997	0.00682946	0.00726232	0.00191133	0.00311616	0.00396817		0.00394652	-3.65e-06	0.00393853	0.00406001	0.00394108	8.69e-06	5.51e-06	0.0186373		-2.41e-07	1.98e-11	8.14e-12	-3.41e-10	3.67e-09	1.88e-11	-1.36e-11	1.75e-08
		0.05		0.00246791	0.000867842	0.00365356	0.0068656	0.00737891	0.00195924	0.00313759	0.00398856		0.00395784	-4.19e-06	0.00395035	0.00406616	0.00395272	8.84e-06	5.71e-06	0.0187316		-2.42e-07	1.96e-11	7.1e-12	-3.26e-10	3.8e-09	1.9e-11	-1.56e-11	1.7e-08
		0.0505		0.00250995	0.000919763	0.00365703	0.00690086	0.00749463	0.00200742	0.00315922	0.00400887		0.00396871	-4.75e-06	0.0039617	0.00407198	0.00396389	8.99e-06	5.91e-06	0.0188237		-2.42e-07	1.94e-11	6.02e-12	-3.1e-10	3.93e-09	1.92e-11	-1.76e-11	1.65e-08
		0.051		0.00255158	0.000973115	0.00366039	0.00693524	0.00760943	0.00205587	0.00318108	0.00402914		0.00397915	-5.33e-06	0.00397261	0.00407747	0.0039746	9.14e-06	6.11e-06	0.0189135		-2.43e-07	1.92e-11	4.87e-12	-2.94e-10	4.06e-09	1.93e-11	-1.97e-11	1.59e-08
		0.0515		0.00259279	0.00102791	0.00366368	0.00696878	0.00772323	0.00210457	0.00320321	0.00404938		0.00398915	-5.93e-06	0.00398308	0.00408266	0.00398485	9.29e-06	6.32e-06	0.0190011		-2.43e-07	1.9e-11	3.68e-12	-2.76e-10	4.19e-09	1.95e-11	-2.19e-11	1.52e-08
		0.052		0.00263355	0.00108415	0.00366691	0.00700149	0.007836	0.00215351	0.00322565	0.0040696		0.00399874	-6.55e-06	0.00399311	0.00408753	0.00399467	9.43e-06	6.53e-06	0.0190865		-2.43e-07	1.87e-11	2.42e-12	-2.57e-10	4.33e-09	1.96e-11	-2.41e-11	1.46e-08
		0.0525		0.00267384	0.00114186	0.00367011	0.00703338	0.00794768	0.0022027	0.00324843	0.00408982		0.00400792	-7.19e-06	0.00400272	0.00409212	0.00400405	9.57e-06	6.75e-06	0.0191698		-2.42e-07	1.84e-11	1.1e-12	-2.37e-10	4.47e-09	1.98e-11	-2.64e-11	1.39e-08
		0.053		0.00271364	0.00120103	0.00367331	0.00706446	0.00805822	0.00225211	0.00327161	0.00411006		0.00401669	-7.85e-06	0.00401192	0.00409641	0.00401301	9.7e-06	6.96e-06	0.0192511		-2.42e-07	1.8e-11	-2.73e-13	-2.16e-10	4.61e-09	1.99e-11	-2.89e-11	1.31e-08
		0.0535		0.00275294	0.00126169	0.00367652	0.00709477	0.00816756	0.00230176	0.00329522	0.00413033		0.00402508	-8.54e-06	0.00402072	0.00410043	0.00402155	9.84e-06	7.18e-06	0.0193303		-2.41e-07	1.76e-11	-1.71e-12	-1.93e-10	4.75e-09	2e-11	-3.13e-11	1.23e-08
		0.054		0.0027917	0.00132382	0.00367978	0.00712431	0.00827567	0.00235163	0.00331931	0.00415066		0.00403308	-9.25e-06	0.00402912	0.00410417	0.00402968	9.97e-06	7.4e-06	0.0194076		-2.39e-07	1.72e-11	-3.22e-12	-1.7e-10	4.89e-09	2.01e-11	-3.39e-11	1.14e-08
		0.0545		0.00282993	0.00138744	0.0036831	0.00715312	0.0083825	0.00240174	0.00334391	0.00417105		0.00404071	-9.98e-06	0.00403713	0.00410765	0.00403742	1.01e-05	7.63e-06	0.0194829		-2.38e-07	1.68e-11	-4.78e-12	-1.45e-10	5.03e-09	2.01e-11	-3.66e-11	1.05e-08
		0.055		0.0028676	0.00145255	0.00368652	0.00718121	0.00848801	0.00245208	0.00336908	0.00419153		0.00404797	-1.07e-05	0.00404477	0.00411088	0.00404476	1.02e-05	7.86e-06	0.0195564		-2.36e-07	1.63e-11	-6.42e-12	-1.19e-10	5.18e-09	2.02e-11	-3.93e-11	9.54e-09
		0.0555		0.00290469	0.00151915	0.00369006	0.0072086	0.00859218	0.00250265	0.00339485	0.0042121		0.00405487	-1.15e-05	0.00405204	0.00411386	0.00405172	1.03e-05	8.09e-06	0.019628		-2.34e-07	1.58e-11	-8.12e-12	-9.16e-11	5.33e-09	2.02e-11	-4.21e-11	8.52e-09
		0.056		0.00294121	0.00158725	0.00369374	0.00723531	0.00869496	0.00255346	0.00342128	0.00423279		0.00406143	-1.23e-05	0.00405894	0.00411661	0.00405831	1.04e-05	8.32e-06	0.0196978		-2.32e-07	1.52e-11	-9.89e-12	-6.29e-11	5.47e-09	2.03e-11	-4.5e-11	7.44e-09
		0.0565		0.00297713	0.00165683	0.0036976	0.00726138	0.00879633	0.00260451	0.0034484	0.00425362		0.00406765	-1.31e-05	0.0040655	0.00411912	0.00406454	1.05e-05	8.55e-06	0.0197659		-2.29e-07	1.46e-11	-1.17e-11	-3.28e-11	5.62e-09	2.03e-11	-4.8e-11	6.31e-09
		0.057		0.00301244	0.00172791	0.00370165	0.00728683	0.00889627	0.00265582	0.00347627	0.00427459		0.00407355	-1.4e-05	0.00407172	0.00412141	0.00407041	1.06e-05	8.79e-06	0.0198323		-2.26e-07	1.4e-11	-1.36e-11	-1.27e-12	5.77e-09	2.02e-11	-5.11e-11	5.13e-09
		0.0575		0.00304713	0.00180047	0.00370594	0.00731167	0.00899475	0.00270739	0.00350493	0.00429572		0.00407912	-1.49e-05	0.0040776	0.00412348	0.00407593	1.07e-05	9.03e-06	0.0198971		-2.22e-07	1.33e-11	-1.56e-11	3.17e-11	5.92e-09	2.02e-11	-5.43e-11	3.88e-09
		0.058		0.0030812	0.00187451	0.00371047	0.00733594	0.00909176	0.00275923	0.00353442	0.00431702		0.00408438	-1.58e-05	0.00408316	0.00412534	0.00408111	1.08e-05	9.27e-06	0.0199602		-2.18e-07	1.25e-11	-1.77e-11	6.6e-11	6.08e-09	2.01e-11	-5.75e-11	2.57e-09
		0.0585		0.00311464	0.00195002	0.00371529	0.00735967	0.00918728	0.00281136	0.00356481	0.00433852		0.00408934	-1.67e-05	0.0040884	0.00412701	0.00408596	1.09e-05	9.51e-06	0.0200219		-2.14e-07	1.18e-11	-1.98e-11	1.02e-10	6.23e-09	2e-11	-6.09e-11	1.2e-09
		0.059		0.00314744	0.00202699	0.00372041	0.00738288	0.00928131	0.00286379	0.00359612	0.00436023		0.004094	-1.76e-05	0.00409333	0.00412848	0.00409048	1.1e-05	9.75e-06	0.0200821		-2.09e-07	1.09e-11	-2.2e-11	1.39e-10	6.38e-09	1.99e-11	-6.43e-11	-2.3e-10
		0.0595		0.00317959	0.00210541	0.00372587	0.00740559	0.00937382	0.00291653	0.00362842	0.00438215		0.00409838	-1.86e-05	0.00409796	0.00412976	0.00409469	1.1e-05	9.99e-06	0.0201408		-2.04e-07	1e-11	-2.43e-11	1.78e-10	6.54e-09	1.98e-11	-6.78e-11	-1.73e-09
		0.06		0.00321109	0.00218528	0.0037317	0.00742785	0.00946481	0.00296959	0.00366176	0.00440431		0.00410248	-1.96e-05	0.0041023	0.00413086	0.0040986	1.11e-05	1.02e-05	0.0201981		-1.98e-07	9.11e-12	-2.67e-11	2.19e-10	6.69e-09	1.96e-11	-7.15e-11	-3.29e-09
		0.0605		0.00324194	0.00226656	0.00373792	0.00744967	0.00955427	0.003023	0.00369617	0.00442671		0.00410631	-2.06e-05	0.00410636	0.00413179	0.0041022	1.11e-05	1.05e-05	0.0202541		-1.92e-07	8.14e-12	-2.92e-11	2.61e-10	6.85e-09	1.94e-11	-7.52e-11	-4.92e-09
		0.061		0.00327213	0.00234925	0.00374457	0.00747109	0.00964222	0.00307676	0.00373172	0.00444938		0.00410988	-2.17e-05	0.00411015	0.00413256	0.00410552	1.12e-05	1.07e-05	0.0203089		-1.86e-07	7.1e-12	-3.17e-11	3.05e-10	7e-09	1.92e-11	-7.9e-11	-6.62e-09
		0.0615		0.00330166	0.00243333	0.00375167	0.00749214	0.00972864	0.00313091	0.00376844	0.00447231		0.0041132	-2.28e-05	0.00411367	0.00413316	0.00410855	1.12e-05	1.1e-05	0.0203623		-1.79e-07	6.02e-12	-3.43e-11	3.5e-10	7.16e-09	1.9e-11	-8.29e-11	-8.4e-09
		0.062		0.00333052	0.00251877	0.00375925	0.00751285	0.00981353	0.00318545	0.0038064	0.00449553		0.00411627	-2.39e-05	0.00411692	0.00413361	0.0041113	1.12e-05	1.12e-05	0.0204146		-1.71e-07	4.87e-12	-3.7e-11	3.98e-10	7.31e-09	1.87e-11	-8.69e-11	-1.02e-08
		0.0625		0.00335871	0.00260555	0.00376734	0.00753325	0.00989691	0.00324041	0.00384564	0.00451904		0.00411911	-2.5e-05	0.00411993	0.00413392	0.00411379	1.12e-05	1.15e-05	0.0204658		-1.63e-07	3.68e-12	-3.98e-11	4.47e-10	7.47e-09	1.84e-11	-9.09e-11	-1.22e-08
		0.063		0.00338624	0.00269364	0.00377597	0.00755337	0.00997878	0.00329581	0.00388622	0.00454287		0.00412172	-2.62e-05	0.0041227	0.00413408	0.00411601	1.12e-05	1.17e-05	0.0205159		-1.55e-07	2.42e-12	-4.27e-11	4.97e-10	7.62e-09	1.8e-11	-9.51e-11	-1.41e-08
		0.0635		0.00341311	0.00278301	0.00378518	0.00757324	0.0100591	0.00335167	0.00392818	0.004567		0.0041241	-2.74e-05	0.00412522	0.00413411	0.00411798	1.12e-05	1.2e-05	0.0205649		-1.46e-07	1.1e-12	-4.56e-11	5.5e-10	7.78e-09	1.76e-11	-9.94e-11	-1.62e-08
		0.064		0.0034393	0.00287364	0.00379499	0.0075929	0.010138	0.00340801	0.00397158	0.00459147		0.00412627	-2.86e-05	0.00412752	0.004134	0.0041197	1.12e-05	1.22e-05	0.0206129		-1.36e-07	-2.73e-13	-4.87e-11	6.04e-10	7.93e-09	1.72e-11	-1.04e-10	-1.84e-08
		0.0645		0.00346483	0.00296548	0.00380543	0.00761238	0.0102154	0.00346486	0.00401646	0.00461627		0.00412824	-2.98e-05	0.0041296	0.00413378	0.00412119	1.11e-05	1.25e-05	0.02066		-1.26e-07	-1.71e-12	-5.18e-11	6.61e-10	8.08e-09	1.68e-11	-1.08e-10	-2.06e-08
		0.065		0.0034897	0.00305851	0.00381654	0.00763172	0.0102914	0.00352223	0.00406288	0.00464142		0.00413	-3.11e-05	0.00413146	0.00413344	0.00412244	1.11e-05	1.27e-05	0.0207062		-1.15e-07	-3.22e-12	-5.51e-11	7.19e-10	8.23e-09	1.63e-11	-1.13e-10	-2.29e-08
		0.0655		0.0035139	0.00315267	0.00382834	0.00765094	0.0103658	0.00358015	0.00411088	0.00466692		0.00413158	-3.23e-05	0.00413312	0.00413299	0.00412346	1.1e-05	1.29e-05	0.0207515		-1.04e-07	-4.78e-12	-5.84e-11	7.79e-10	8.38e-09	1.58e-11	-1.17e-10	-2.53e-08
		0.066		0.00353745	0.00324793	0.00384086	0.00767009	0.0104389	0.00363865	0.00416053	0.00469279		0.00413296	-3.37e-05	0.00413457	0.00413243	0.00412427	1.09e-05	1.32e-05	0.020796		-9.16e-08	-6.42e-12	-6.18e-11	8.41e-10	8.53e-09	1.52e-11	-1.22e-10	-2.77e-08
		0.0665		0.00356033	0.00334423	0.00385415	0.00768919	0.0105106	0.00369775	0.00421187	0.00471902		0.00413418	-3.5e-05	0.00413584	0.00413176	0.00412486	1.08e-05	1.34e-05	0.0208398		-7.9e-08	-8.12e-12	-6.53e-11	9.05e-10	8.67e-09	1.46e-11	-1.27e-10	-3.03e-08
		0.067		0.00358257	0.00344154	0.00386822	0.00770828	0.0105808	0.00375748	0.00426495	0.00474563		0.00413521	-3.64e-05	0.00413691	0.00413101	0.00412525	1.07e-05	1.36e-05	0.0208828		-6.56e-08	-9.89e-12	-6.89e-11	9.71e-10	8.81e-09	1.4e-11	-1.32e-10	-3.29e-08
		0.0675		0.00360415	0.00353979	0.00388311	0.0077274	0.0106497	0.00381785	0.00431982	0.00477262		0.00413609	-3.77e-05	0.00413781	0.00413016	0.00412544	1.06e-05	1.39e-05	0.0209251		-5.17e-08	-1.17e-11	-7.26e-11	1.04e-09	8.96e-09	1.33e-11	-1.37e-10	-3.57e-08
		0.068		0.00362509	0.00363894	0.00389886	0.00774658	0.0107173	0.00387891	0.00437654	0.00479999		0.0041368	-3.92e-05	0.00413853	0.00412923	0.00412543	1.05e-05	1.41e-05	0.0209668		-3.7e-08	-1.36e-11	-7.64e-11	1.11e-09	9.09e-09	1.25e-11	-1.42e-10	-3.85e-08
		0.0685		0.00364539	0.00373892	0.00391549	0.00776586	0.0107835	0.00394067	0.00443514	0.00482775		0.00413736	-4.06e-05	0.00413908	0.00412821	0.00412524	1.03e-05	1.43e-05	0.021008		-2.16e-08	-1.56e-11	-8.03e-11	1.18e-09	9.23e-09	1.18e-11	-1.47e-10	-4.14e-08
		0.069		0.00366505	0.00383966	0.00393303	0.00778527	0.0108485	0.00400315	0.00449569	0.00485591		0.00413778	-4.21e-05	0.00413947	0.00412711	0.00412486	1.01e-05	1.45e-05	0.0210485		-5.47e-09	-1.77e-11	-8.42e-11	1.25e-09	9.36e-09	1.09e-11	-1.53e-10	-4.44e-08
		0.0695		0.00368409	0.00394111	0.00395153	0.00780486	0.0109122	0.00406639	0.00455823	0.00488446		0.00413806	-4.36e-05	0.00413971	0.00412595	0.00412431	9.92e-06	1.47e-05	0.0210885		1.14e-08	-1.98e-11	-8.83e-11	1.33e-09	9.49e-09	1e-11	-1.58e-10	-4.75e-08
		0.07		0.0037025	0.00404319	0.003971	0.00782465	0.0109746	0.00413041	0.00462281	0.00491341		0.0041382	-4.51e-05	0.00413979	0.00412472	0.00412359	9.71e-06	1.5e-05	0.0211281		2.9e-08	-2.2e-11	-9.25e-11	1.41e-09	9.61e-09	9.11e-12	-1.63e-10	-5.06e-08
		0.0705		0.00372028	0.00414584	0.00399149	0.00784468	0.0110359	0.00419524	0.00468948	0.00494276		0.00413822	-4.66e-05	0.00413974	0.00412342	0.00412271	9.47e-06	1.52e-05	0.0211672		4.74e-08	-2.43e-11	-9.68e-11	1.49e-09	9.73e-09	8.14e-12	-1.69e-10	-5.39e-08
		0.071		0.00373746	0.004249	0.00401302	0.007865	0.011096	0.0042609	0.00475829	0.00497251		0.00413812	-4.82e-05	0.00413954	0.00412206	0.00412166	9.22e-06	1.54e-05	0.0212059		6.65e-08	-2.67e-11	-1.01e-10	1.57e-09	9.85e-09	7.1e-12	-1.74e-10	-5.73e-08
		0.0715		0.00375403	0.0043526	0.00403563	0.00788563	0.0111549	0.00432742	0.00482927	0.00500265		0.00413789	-4.97e-05	0.00413921	0.00412065	0.00412047	8.94e-06	1.55e-05	0.0212442		8.65e-08	-2.92e-11	-1.06e-10	1.66e-09	9.96e-09	6.02e-12	-1.8e-10	-6.07e-08
		0.072		0.00377	0.00445659	0.00405935	0.00790662	0.0112127	0.00439482	0.00490249	0.00503319		0.00413756	-5.13e-05	0.00413875	0.00411918	0.00411912	8.65e-06	1.57e-05	0.0212822		1.07e-07	-3.17e-11	-1.1e-10	1.74e-09	1.01e-08	4.87e-12	-1.86e-10	-6.43e-08
		0.0725		0.00378538	0.00456092	0.00408421	0.00792799	0.0112695	0.00446313	0.00497798	0.00506413		0.00413712	-5.3e-05	0.00413817	0.00411767	0.00411763	8.33e-06	1.59e-05	0.0213198		1.29e-07	-3.43e-11	-1.15e-10	1.83e-09	1.02e-08	3.68e-12	-1.92e-10	-6.79e-08
		0.073		0.00380018	0.00466555	0.00411025	0.0079498	0.0113252	0.00453237	0.00505579	0.00509545		0.00413658	-5.46e-05	0.00413748	0.00411611	0.004116	7.98e-06	1.61e-05	0.0213572		1.51e-07	-3.7e-11	-1.2e-10	1.93e-09	1.03e-08	2.42e-12	-1.98e-10	-7.17e-08
		0.0735		0.00381439	0.00477042	0.00413748	0.00797208	0.0113799	0.00460257	0.00513596	0.00512716		0.00413595	-5.63e-05	0.00413667	0.00411451	0.00411424	7.62e-06	1.62e-05	0.0213944		1.75e-07	-3.98e-11	-1.24e-10	2.02e-09	1.04e-08	1.1e-12	-2.04e-10	-7.55e-08
		0.074		0.00382804	0.0048755	0.00416596	0.00799486	0.0114337	0.00467375	0.00521853	0.00515924		0.00413522	-5.79e-05	0.00413575	0.00411288	0.00411235	7.23e-06	1.64e-05	0.0214313		1.99e-07	-4.27e-11	-1.29e-10	2.11e-09	1.04e-08	-2.73e-13	-2.1e-10	-7.95e-08
		0.0745		0.00384112	0.00498074	0.00419571	0.00801818	0.0114865	0.00474593	0.00530355	0.0051917		0.00413441	-5.96e-05	0.00413473	0.0041112	0.00411034	6.81e-06	1.65e-05	0.021468		2.24e-07	-4.56e-11	-1.34e-10	2.21e-09	1.05e-08	-1.71e-12	-2.16e-10	-8.35e-08
		0.075		0.00385365	0.00508611	0.00422675	0.00804208	0.0115384	0.00481914	0.00539106	0.00522452		0.00413352	-6.13e-05	0.00413361	0.0041095	0.00410821	6.37e-06	1.66e-05	0.0215046		2.5e-07	-4.87e-11	-1.39e-10	2.31e-09	1.06e-08	-3.22e-12	-2.22e-10	-8.76e-08
		0.0755		0.00386564	0.00519158	0.00425913	0.00806659	0.0115895	0.0048934	0.00548109	0.00525769		0.00413255	-6.31e-05	0.00413239	0.00410778	0.00410596	5.91e-06	1.68e-05	0.021541		2.77e-07	-5.18e-11	-1.45e-10	2.42e-09	1.06e-08	-4.78e-12	-2.28e-10	-9.19e-08
		0.076		0.00387709	0.00529712	0.00429288	0.00809176	0.0116397	0.00496872	0.00557369	0.00529121		0.00413151	-6.48e-05	0.00413109	0.00410602	0.00410361	5.41e-06	1.69e-05	0.0215773		3.05e-07	-5.51e-11	-1.5e-10	2.52e-09	1.07e-08	-6.42e-12	-2.35e-10	-9.62e-08
		0.0765		0.003888	0.0054027	0.00432801	0.00811762	0.0116892	0.00504514	0.00566888	0.00532506		0.0041304	-6.66e-05	0.0041297	0.00410425	0.00410114	4.89e-06	1.7e-05	0.0216135		3.34e-07	-5.84e-11	-1.55e-10	2.63e-09	1.07e-08	-8.12e-12	-2.41e-10	-1.01e-07
		0.077		0.0038984	0.0055083	0.00436458	0.00814421	0.0117379	0.00512266	0.00576671	0.00535922		0.00412922	-6.84e-05	0.00412823	0.00410245	0.00409858	4.34e-06	1.7e-05	0.0216496		3.64e-07	-6.18e-11	-1.61e-10	2.74e-09	1.08e-08	-9.89e-12	-2.47e-10	-1.05e-07
		0.0775		0.00390829	0.00561389	0.00440259	0.00817157	0.0117859	0.00520131	0.0058672	0.00539369		0.00412799	-7.01e-05	0.00412667	0.00410064	0.00409592	3.76e-06	1.71e-05	0.0216857		3.95e-07	-6.53e-11	-1.66e-10	2.85e-09	1.08e-08	-1.17e-11	-2.54e-10	-1.1e-07
		0.078		0.00391767	0.00571946	0.0044421	0.00819972	0.0118332	0.0052811	0.00597039	0.00542845		0.0041267	-7.19e-05	0.00412505	0.00409881	0.00409316	3.15e-06	1.72e-05	0.0217217		4.26e-07	-6.89e-11	-1.72e-10	2.96e-09	1.08e-08	-1.36e-11	-2.6e-10	-1.15e-07
		0.0785		0.00392656	0.00582499	0.00448312	0.00822872	0.0118799	0.00536205	0.00607631	0.00546348		0.00412536	-7.37e-05	0.00412335	0.00409698	0.00409031	2.5e-06	1.72e-05	0.0217577		4.59e-07	-7.26e-11	-1.78e-10	3.08e-09	1.08e-08	-1.56e-11	-2.67e-10	-1.19e-07
		0.079		0.00393496	0.00593046	0.00452568	0.0082586	0.0119261	0.00544417	0.00618499	0.00549877		0.00412397	-7.55e-05	0.00412159	0.00409513	0.00408738	1.83e-06	1.72e-05	0.0217937		4.93e-07	-7.64e-11	-1.84e-10	3.19e-09	1.08e-08	-1.77e-11	-2.73e-10	-1.24e-07
		0.0795		0.00394289	0.00603586	0.00456982	0.00828938	0.0119717	0.00552748	0.00629644	0.00553428		0.00412253	-7.74e-05	0.00411976	0.00409328	0.00408436	1.12e-06	1.72e-05	0.0218297		5.28e-07	-8.03e-11	-1.9e-10	3.31e-09	1.08e-08	-1.98e-11	-2.8e-10	-1.29e-07
		0.08		0.00395034	0.00614119	0.00461556	0.00832112	0.0120167	0.00561199	0.0064107	0.00557001		0.00412106	-7.92e-05	0.00411787	0.00409142	0.00408127	3.85e-07	1.72e-05	0.0218656		5.64e-07	-8.42e-11	-1.95e-10	3.44e-09	1.08e-08	-2.2e-11	-2.86e-10	-1.35e-07
		0.0805		0.00395734	0.00624642	0.00466292	0.00835384	0.0120613	0.00569771	0.00652778	0.00560593		0.00411954	-8.1e-05	0.00411593	0.00408956	0.0040781	-3.88e-07	1.72e-05	0.0219016		6.01e-07	-8.83e-11	-2.02e-10	3.56e-09	1.08e-08	-2.43e-11	-2.93e-10	-1.4e-07
		0.081		0.0039639	0.00635156	0.00471194	0.00838758	0.0121055	0.00578464	0.0066477	0.00564201		0.00411799	-8.28e-05	0.00411393	0.0040877	0.00407485	-1.2e-06	1.71e-05	0.0219376		6.39e-07	-9.25e-11	-2.08e-10	3.69e-09	1.07e-08	-2.67e-11	-2.99e-10	-1.45e-07
		0.0815		0.00397001	0.0064566	0.00476265	0.00842237	0.0121493	0.0058728	0.00677049	0.00567824		0.0041164	-8.46e-05	0.00411187	0.00408584	0.00407154	-2.04e-06	1.71e-05	0.0219736		6.78e-07	-9.68e-11	-2.14e-10	3.82e-09	1.06e-08	-2.92e-11	-3.06e-10	-1.51e-07
		0.082		0.00397569	0.00656154	0.00481506	0.00845826	0.0121928	0.00596219	0.00689614	0.00571457		0.00411479	-8.65e-05	0.00410977	0.00408398	0.00406817	-2.92e-06	1.7e-05	0.0220097		7.19e-07	-1.01e-10	-2.2e-10	3.95e-09	1.06e-08	-3.17e-11	-3.12e-10	-1.56e-07
		0.0825		0.00398095	0.00666637	0.00486921	0.00849527	0.0122359	0.00605281	0.00702468	0.00575099		0.00411315	-8.83e-05	0.00410762	0.00408213	0.00406473	-3.83e-06	1.69e-05	0.0220458		7.6e-07	-1.06e-10	-2.26e-10	4.08e-09	1.05e-08	-3.43e-11	-3.19e-10	-1.62e-07
		0.083		0.00398579	0.00677109	0.00492511	0.00853344	0.0122788	0.00614467	0.00715612	0.00578746		0.00411148	-9.01e-05	0.00410543	0.00408029	0.00406123	-4.79e-06	1.67e-05	0.0220819		8.03e-07	-1.1e-10	-2.33e-10	4.21e-09	1.04e-08	-3.7e-11	-3.25e-10	-1.67e-07
		0.0835		0.00399024	0.00687571	0.00498279	0.0085728	0.0123214	0.00623776	0.00729045	0.00582394		0.0041098	-9.19e-05	0.0041032	0.00407845	0.00405767	-5.78e-06	1.66e-05	0.022118		8.46e-07	-1.15e-10	-2.39e-10	4.35e-09	1.03e-08	-3.98e-11	-3.32e-10	-1.73e-07
		0.084		0.00399429	0.00698021	0.00504228	0.00861339	0.0123638	0.00633208	0.00742768	0.00586042		0.00410809	-9.37e-05	0.00410093	0.00407663	0.00405407	-6.81e-06	1.64e-05	0.0221541		8.91e-07	-1.2e-10	-2.46e-10	4.49e-09	1.01e-08	-4.27e-11	-3.38e-10	-1.79e-07
		0.0845		0.00399796	0.00708462	0.00510359	0.00865523	0.0124061	0.00642763	0.00756781	0.00589684		0.00410637	-9.55e-05	0.00409862	0.00407481	0.00405041	-7.89e-06	1.62e-05	0.0221903		9.37e-07	-1.24e-10	-2.52e-10	4.62e-09	9.96e-09	-4.56e-11	-3.45e-10	-1.85e-07
		0.085		0.00400125	0.00718893	0.00516674	0.00869837	0.0124483	0.0065244	0.00771084	0.00593318		0.00410464	-9.72e-05	0.00409627	0.00407301	0.0040467	-9e-06	1.6e-05	0.0222264		9.84e-07	-1.29e-10	-2.59e-10	4.77e-09	9.79e-09	-4.87e-11	-3.51e-10	-1.91e-07
		0.0855		0.00400417	0.00729315	0.00523176	0.00874282	0.0124904	0.00662239	0.00785675	0.00596941		0.00410289	-9.9e-05	0.0040939	0.00407123	0.00404295	-1.02e-05	1.57e-05	0.0222626		1.03e-06	-1.34e-10	-2.65e-10	4.91e-09	9.6e-09	-5.18e-11	-3.57e-10	-1.97e-07
		0.086		0.00400675	0.00739728	0.00529866	0.00878863	0.0125324	0.00672157	0.00800553	0.00600549		0.00410113	-0.000100691	0.00409149	0.00406945	0.00403916	-1.13e-05	1.54e-05	0.0222987		1.08e-06	-1.39e-10	-2.72e-10	5.05e-09	9.4e-09	-5.51e-11	-3.63e-10	-2.03e-07
		0.0865		0.00400897	0.00750133	0.00536746	0.00883582	0.0125745	0.00682194	0.00815718	0.0060414		0.00409937	-0.000102389	0.00408906	0.0040677	0.00403534	-1.26e-05	1.51e-05	0.0223347		1.13e-06	-1.45e-10	-2.79e-10	5.2e-09	9.17e-09	-5.84e-11	-3.69e-10	-2.1e-07
		0.087		0.00401086	0.0076053	0.00543817	0.00888442	0.0126165	0.00692347	0.00831166	0.00607712		0.00409759	-0.000104062	0.0040866	0.00406596	0.00403147	-1.39e-05	1.48e-05	0.0223707		1.18e-06	-1.5e-10	-2.85e-10	5.35e-09	8.93e-09	-6.18e-11	-3.75e-10	-2.16e-07
		0.0875		0.00401242	0.00770921	0.00551082	0.00893445	0.0126587	0.00702615	0.00846897	0.00611261		0.00409582	-0.000105706	0.00408411	0.00406424	0.00402757	-1.52e-05	1.44e-05	0.0224066		1.24e-06	-1.55e-10	-2.92e-10	5.49e-09	8.66e-09	-6.53e-11	-3.81e-10	-2.23e-07
		0.088		0.00401366	0.00781305	0.00558541	0.00898595	0.0127009	0.00712996	0.00862906	0.00614785		0.00409404	-0.000107318	0.0040816	0.00406254	0.00402364	-1.66e-05	1.4e-05	0.0224424		1.29e-06	-1.61e-10	-2.99e-10	5.64e-09	8.38e-09	-6.89e-11	-3.87e-10	-2.29e-07
		0.0885		0.00401459	0.00791684	0.00566195	0.00903895	0.0127433	0.00723487	0.00879191	0.00618283		0.00409225	-0.000108894	0.00407907	0.00406086	0.00401969	-1.8e-05	1.36e-05	0.0224781		1.35e-06	-1.66e-10	-3.05e-10	5.79e-09	8.07e-09	-7.26e-11	-3.93e-10	-2.36e-07
		0.089		0.00401522	0.00802059	0.00574045	0.00909346	0.0127858	0.00734086	0.00895748	0.00621753		0.00409047	-0.000110432	0.00407652	0.00405919	0.0040157	-1.95e-05	1.31e-05	0.0225136		1.4e-06	-1.72e-10	-3.12e-10	5.94e-09	7.75e-09	-7.64e-11	-3.98e-10	-2.42e-07
		0.0895		0.00401556	0.0081243	0.00582093	0.00914952	0.0128286	0.00744788	0.00912574	0.00625193		0.00408869	-0.000111929	0.00407394	0.00405756	0.0040117	-2.1e-05	1.26e-05	0.022549		1.46e-06	-1.78e-10	-3.19e-10	6.1e-09	7.39e-09	-8.03e-11	-4.03e-10	-2.49e-07
		0.09		0.00401562	0.00822799	0.00590338	0.00920713	0.0128716	0.0075559	0.00929663	0.00628601		0.00408691	-0.000113381	0.00407135	0.00405594	0.00400768	-2.25e-05	1.21e-05	0.0225841		1.52e-06	-1.84e-10	-3.26e-10	6.25e-09	7.02e-09	-8.42e-11	-4.09e-10	-2.56e-07
		0.0905		0.0040154	0.00833165	0.00598782	0.00926634	0.0129148	0.0076649	0.0094701	0.00631977		0.00408514	-0.000114784	0.00406875	0.00405435	0.00400364	-2.41e-05	1.15e-05	0.0226189		1.58e-06	-1.9e-10	-3.32e-10	6.4e-09	6.62e-09	-8.83e-11	-4.14e-10	-2.63e-07
		0.091		0.00401492	0.00843531	0.00607425	0.00932716	0.0129584	0.00777482	0.00964611	0.00635318		0.00408337	-0.000116136	0.00406613	0.00405278	0.00399958	-2.58e-05	1.09e-05	0.0226535		1.64e-06	-1.95e-10	-3.39e-10	6.56e-09	6.2e-09	-9.25e-11	-4.18e-10	-2.69e-07
		0.0915		0.00401419	0.00853896	0.00616266	0.0093896	0.0130023	0.00788561	0.00982458	0.00638625		0.00408161	-0.000117431	0.00406349	0.00405124	0.00399551	-2.75e-05	1.03e-05	0.0226878		1.7e-06	-2.02e-10	-3.45e-10	6.71e-09	5.75e-09	-9.68e-11	-4.23e-10	-2.76e-07
		0.092		0.00401322	0.00864261	0.00625306	0.00945369	0.0130465	0.00799724	0.0100054	0.00641896		0.00407986	-0.000118667	0.00406085	0.00404972	0.00399143	-2.92e-05	9.58e-06	0.0227218		1.76e-06	-2.08e-10	-3.52e-10	6.87e-09	5.27e-09	-1.01e-10	-4.27e-10	-2.83e-07
		0.0925		0.004012	0.00874627	0.00634545	0.00951945	0.0130911	0.00810965	0.0101887	0.0064513		0.00407811	-0.000119839	0.00405818	0.00404823	0.00398735	-3.1e-05	8.85e-06	0.0227555		1.83e-06	-2.14e-10	-3.58e-10	7.02e-09	4.77e-09	-1.06e-10	-4.32e-10	-2.9e-07
		0.093		0.00401057	0.00884995	0.00643981	0.00958689	0.0131362	0.00822278	0.0103741	0.00648327		0.00407637	-0.000120943	0.00405551	0.00404676	0.00398325	-3.29e-05	8.08e-06	0.0227888		1.89e-06	-2.2e-10	-3.65e-10	7.18e-09	4.24e-09	-1.1e-10	-4.35e-10	-2.97e-07
		0.0935		0.00400891	0.00895365	0.00653615	0.00965602	0.0131816	0.00833657	0.0105618	0.00651487		0.00407464	-0.000121975	0.00405283	0.00404532	0.00397916	-3.48e-05	7.26e-06	0.0228217		1.96e-06	-2.26e-10	-3.71e-10	7.33e-09	3.68e-09	-1.15e-10	-4.39e-10	-3.04e-07
		0.094		0.00400705	0.00905737	0.00663445	0.00972686	0.0132276	0.00845096	0.0107516	0.0065461		0.00407292	-0.000122932	0.00405014	0.00404391	0.00397507	-3.68e-05	6.4e-06	0.0228542		2.03e-06	-2.33e-10	-3.77e-10	7.49e-09	3.1e-09	-1.2e-10	-4.42e-10	-3.11e-07
		0.0945		0.00400499	0.00916112	0.00673469	0.00979942	0.013274	0.00856589	0.0109434	0.00657694		0.00407122	-0.000123807	0.00404744	0.00404252	0.00397098	-3.88e-05	5.5e-06	0.0228863		2.09e-06	-2.39e-10	-3.84e-10	7.64e-09	2.48e-09	-1.24e-10	-4.46e-10	-3.18e-07
		0.095		0.00400274	0.00926491	0.00683687	0.0098737	0.0133209	0.0086813	0.0111372	0.00660741		0.00406952	-0.000124598	0.00404473	0.00404116	0.0039669	-4.08e-05	4.55e-06	0.022918		2.16e-06	-2.46e-10	-3.9e-10	7.8e-09	1.83e-09	-1.29e-10	-4.48e-10	-3.25e-07
		0.0955		0.0040003	0.00936872	0.00694097	0.00994972	0.0133683	0.00879712	0.011333	0.00663751		0.00406783	-0.000125298	0.00404201	0.00403982	0.00396283	-4.29e-05	3.55e-06	0.0229492		2.23e-06	-2.52e-10	-3.95e-10	7.95e-09	1.15e-09	-1.34e-10	-4.51e-10	-3.32e-07
		0.096		0.0039977	0.00947257	0.00704696	0.0100275	0.0134163	0.0089133	0.0115305	0.00666723		0.00406616	-0.000125904	0.00403929	0.00403852	0.00395877	-4.51e-05	2.5e-06	0.02298		2.3e-06	-2.59e-10	-4.01e-10	8.1e-09	4.43e-10	-1.39e-10	-4.53e-10	-3.39e-07
		0.0965		0.00399493	0.00957645	0.00715483	0.010107	0.0134649	0.00902977	0.0117299	0.00669659		0.0040645	-0.000126411	0.00403656	0.00403724	0.00395472	-4.73e-05	1.4e-06	0.0230102		2.38e-06	-2.65e-10	-4.07e-10	8.25e-09	-3e-10	-1.45e-10	-4.54e-10	-3.46e-07
		0.097		0.00399202	0.00968035	0.00726454	0.0101882	0.013514	0.00914646	0.011931	0.00672559		0.00406285	-0.000126813	0.00403382	0.00403599	0.00395068	-4.96e-05	2.53e-07	0.02304		2.45e-06	-2.72e-10	-4.12e-10	8.4e-09	-1.08e-09	-1.5e-10	-4.56e-10	-3.53e-07
		0.0975		0.00398895	0.00978428	0.00737607	0.0102713	0.0135638	0.00926331	0.0121337	0.00675424		0.00406122	-0.000127105	0.00403108	0.00403476	0.00394667	-5.19e-05	-9.49e-07	0.0230694		2.52e-06	-2.79e-10	-4.18e-10	8.54e-09	-1.89e-09	-1.55e-10	-4.57e-10	-3.6e-07
		0.098		0.00398576	0.00988823	0.00748938	0.010356	0.0136141	0.00938026	0.0123381	0.00678254		0.0040596	-0.000127282	0.00402834	0.00403357	0.00394268	-5.43e-05	-2.2e-06	0.0230982		2.6e-06	-2.85e-10	-4.23e-10	8.69e-09	-2.73e-09	-1.61e-10	-4.57e-10	-3.67e-07
		0.0985		0.00398243	0.00999219	0.00760445	0.0104425	0.0136651	0.00949724	0.0125439	0.0068105		0.00405799	-0.000127339	0.00402559	0.0040324	0.00393872	-5.67e-05	-3.51e-06	0.0231264		2.67e-06	-2.92e-10	-4.28e-10	8.83e-09	-3.62e-09	-1.66e-10	-4.57e-10	-3.73e-07
		0.099		0.00397899	0.0100962	0.00772122	0.0105307	0.0137167	0.00961418	0.0127512	0.00683815		0.00405639	-0.000127269	0.00402283	0.00403126	0.00393479	-5.92e-05	-4.88e-06	0.0231542		2.75e-06	-2.99e-10	-4.33e-10	8.97e-09	-4.53e-09	-1.72e-10	-4.57e-10	-3.8e-07
		0.0995		0.00397545	0.0102001	0.00783966	0.0106207	0.013769	0.00973104	0.0129599	0.00686547		0.0040548	-0.000127068	0.00402008	0.00403014	0.00393088	-6.18e-05	-6.3e-06	0.0231814		2.82e-06	-3.05e-10	-4.37e-10	9.11e-09	-5.49e-09	-1.78e-10	-4.56e-10	-3.87e-07
		0.1		0.0039718	0.010304	0.00795973	0.0107123	0.0138219	0.00984775	0.0131699	0.00689251		0.00405323	-0.00012673	0.00401731	0.00402905	0.00392702	-6.44e-05	-7.79e-06	0.0232081		2.9e-06	-3.12e-10	-4.41e-10	9.24e-09	-6.48e-09	-1.84e-10	-4.55e-10	-3.93e-07
		0.1005		0.00396806	0.0104079	0.00808136	0.0108057	0.0138754	0.00996425	0.0133812	0.00691925		0.00405168	-0.000126249	0.00401455	0.00402799	0.00392319	-6.7e-05	-9.33e-06	0.0232343		2.98e-06	-3.19e-10	-4.45e-10	9.37e-09	-7.51e-09	-1.9e-10	-4.53e-10	-3.99e-07
		0.101		0.00396425	0.0105117	0.00820451	0.0109007	0.0139297	0.0100805	0.0135937	0.00694573		0.00405013	-0.000125618	0.00401179	0.00402696	0.0039194	-6.97e-05	-1.09e-05	0.0232599		3.06e-06	-3.26e-10	-4.49e-10	9.5e-09	-8.59e-09	-1.95e-10	-4.51e-10	-4.06e-07
		0.1015		0.00396037	0.0106155	0.00832912	0.0109974	0.0139846	0.0101965	0.0138073	0.00697196		0.0040486	-0.000124832	0.00400902	0.00402595	0.00391565	-7.24e-05	-1.26e-05	0.023285		3.14e-06	-3.32e-10	-4.53e-10	9.63e-09	-9.7e-09	-2.02e-10	-4.48e-10	-4.12e-07
		0.102		0.00395642	0.0107191	0.00845513	0.0110958	0.0140401	0.010312	0.0140219	0.00699794		0.00404707	-0.000123884	0.00400625	0.00402497	0.00391195	-7.52e-05	-1.43e-05	0.0233095		3.22e-06	-3.39e-10	-4.56e-10	9.75e-09	-1.08e-08	-2.08e-10	-4.44e-10	-4.18e-07
		0.1025		0.00395242	0.0108227	0.00858247	0.0111958	0.0140964	0.0104272	0.0142375	0.00702372		0.00404556	-0.000122767	0.00400347	0.00402402	0.00390831	-7.81e-05	-1.61e-05	0.0233334		3.3e-06	-3.45e-10	-4.59e-10	9.86e-09	-1.2e-08	-2.14e-10	-4.4e-10	-4.24e-07
		0.103		0.00394838	0.010926	0.00871107	0.0112973	0.0141532	0.010542	0.014454	0.00704929		0.00404406	-0.000121477	0.0040007	0.00402309	0.00390472	-8.1e-05	-1.8e-05	0.0233568		3.38e-06	-3.52e-10	-4.61e-10	9.97e-09	-1.33e-08	-2.2e-10	-4.35e-10	-4.3e-07
		0.1035		0.00394431	0.0110292	0.00884086	0.0114004	0.0142108	0.0106563	0.0146713	0.00707469		0.00404257	-0.000120005	0.00399793	0.00402218	0.00390119	-8.4e-05	-1.99e-05	0.0233796		3.46e-06	-3.58e-10	-4.63e-10	1.01e-08	-1.46e-08	-2.26e-10	-4.3e-10	-4.35e-07
		0.104		0.00394022	0.0111322	0.00897175	0.0115051	0.014269	0.01077	0.0148894	0.00709993		0.00404109	-0.000118345	0.00399515	0.00402131	0.00389772	-8.7e-05	-2.19e-05	0.0234018		3.54e-06	-3.65e-10	-4.65e-10	1.02e-08	-1.59e-08	-2.33e-10	-4.23e-10	-4.41e-07
		0.1045		0.00393611	0.0112349	0.00910367	0.0116112	0.0143278	0.0108831	0.0151081	0.00712504		0.00403962	-0.00011649	0.00399237	0.00402045	0.00389432	-9e-05	-2.39e-05	0.0234235		3.62e-06	-3.71e-10	-4.67e-10	1.03e-08	-1.72e-08	-2.39e-10	-4.17e-10	-4.46e-07
		0.105		0.00393199	0.0113374	0.00923652	0.0117188	0.0143873	0.0109957	0.0153273	0.00715004		0.00403816	-0.000114434	0.0039896	0.00401962	0.00389098	-9.31e-05	-2.61e-05	0.0234447		3.7e-06	-3.77e-10	-4.68e-10	1.04e-08	-1.86e-08	-2.46e-10	-4.09e-10	-4.51e-07
		0.1055		0.00392788	0.0114395	0.00937023	0.0118278	0.0144474	0.0111076	0.0155471	0.00717495		0.00403671	-0.000112168	0.00398682	0.00401882	0.00388772	-9.63e-05	-2.83e-05	0.0234652		3.78e-06	-3.84e-10	-4.68e-10	1.04e-08	-2.01e-08	-2.52e-10	-4.01e-10	-4.55e-07
		0.106		0.00392379	0.0115412	0.0095047	0.0119382	0.0145081	0.0112188	0.0157672	0.0071998		0.00403527	-0.000109686	0.00398405	0.00401803	0.00388454	-9.94e-05	-3.05e-05	0.0234852		3.86e-06	-3.9e-10	-4.69e-10	1.05e-08	-2.16e-08	-2.59e-10	-3.92e-10	-4.6e-07
		0.1065		0.00391972	0.0116424	0.00963985	0.0120499	0.0145695	0.0113293	0.0159877	0.00722462		0.00403383	-0.000106981	0.00398127	0.00401728	0.00388145	-0.000102677	-3.29e-05	0.0235047		3.94e-06	-3.95e-10	-4.68e-10	1.06e-08	-2.32e-08	-2.65e-10	-3.82e-10	-4.64e-07
		0.107		0.00391569	0.0117432	0.00977558	0.012163	0.0146316	0.011439	0.0162083	0.00724942		0.0040324	-0.000104045	0.0039785	0.00401654	0.00387844	-0.000105956	-3.53e-05	0.0235236		4.02e-06	-4.01e-10	-4.67e-10	1.06e-08	-2.47e-08	-2.72e-10	-3.71e-10	-4.68e-07
		0.1075		0.0039117	0.0118435	0.00991181	0.0122773	0.0146942	0.0115479	0.0164291	0.00727424		0.00403097	-0.000100871	0.00397572	0.00401583	0.00387552	-0.000109277	-3.78e-05	0.0235419		4.1e-06	-4.07e-10	-4.66e-10	1.07e-08	-2.64e-08	-2.79e-10	-3.59e-10	-4.72e-07
		0.108		0.00390777	0.0119432	0.0100484	0.012393	0.0147575	0.011656	0.0166498	0.00729911		0.00402955	-9.75e-05	0.00397295	0.00401513	0.0038727	-0.000112638	-4.03e-05	0.0235597		4.17e-06	-4.12e-10	-4.64e-10	1.07e-08	-2.81e-08	-2.85e-10	-3.47e-10	-4.75e-07
		0.1085		0.00390391	0.0120423	0.0101854	0.0125098	0.0148215	0.0117633	0.0168705	0.00732405		0.00402813	-9.38e-05	0.00397018	0.00401446	0.00386997	-0.000116039	-4.3e-05	0.023577		4.25e-06	-4.18e-10	-4.62e-10	1.08e-08	-2.98e-08	-2.92e-10	-3.33e-10	-4.78e-07
		0.109		0.00390011	0.0121407	0.0103225	0.0126279	0.0148861	0.0118696	0.017091	0.00734909		0.00402672	-8.98e-05	0.00396742	0.00401381	0.00386736	-0.000119476	-4.57e-05	0.0235937		4.33e-06	-4.23e-10	-4.59e-10	1.08e-08	-3.16e-08	-2.99e-10	-3.19e-10	-4.81e-07
		0.1095		0.00389641	0.0122384	0.0104598	0.0127471	0.0149514	0.011975	0.0173112	0.00737427		0.0040253	-8.56e-05	0.00396466	0.00401318	0.00386486	-0.00012295	-4.85e-05	0.0236098		4.41e-06	-4.28e-10	-4.55e-10	1.08e-08	-3.34e-08	-3.05e-10	-3.03e-10	-4.83e-07
		0.11		0.0038928	0.0123354	0.0105972	0.0128674	0.0150174	0.0120794	0.0175311	0.00739961		0.00402389	-8.12e-05	0.0039619	0.00401257	0.00386247	-0.000126457	-5.13e-05	0.0236254		4.48e-06	-4.33e-10	-4.51e-10	1.08e-08	-3.53e-08	-3.12e-10	-2.87e-10	-4.85e-07
		0.1105		0.0038893	0.0124315	0.0107345	0.0129888	0.0150841	0.0121829	0.0177504	0.00742514		0.00402248	-7.64e-05	0.00395914	0.00401198	0.0038602	-0.000129996	-5.43e-05	0.0236406		4.56e-06	-4.37e-10	-4.46e-10	1.08e-08	-3.73e-08	-3.19e-10	-2.7e-10	-4.86e-07
		0.111		0.00388591	0.0125268	0.0108716	0.0131113	0.0151514	0.0122853	0.0179692	0.0074509		0.00402107	-7.13e-05	0.00395639	0.0040114	0.00385806	-0.000133564	-5.73e-05	0.0236551		4.63e-06	-4.41e-10	-4.41e-10	1.08e-08	-3.92e-08	-3.26e-10	-2.51e-10	-4.87e-07
		0.1115		0.00388265	0.0126211	0.0110086	0.0132348	0.0152195	0.0123866	0.0181873	0.00747692		0.00401966	-6.6e-05	0.00395364	0.00401085	0.00385605	-0.00013716	-6.04e-05	0.0236692		4.7e-06	-4.45e-10	-4.35e-10	1.08e-08	-4.13e-08	-3.32e-10	-2.32e-10	-4.88e-07
		0.112		0.00387953	0.0127146	0.0111453	0.0133592	0.0152883	0.0124869	0.0184046	0.00750323		0.00401824	-6.03e-05	0.0039509	0.00401031	0.00385418	-0.000140781	-6.36e-05	0.0236828		4.77e-06	-4.49e-10	-4.28e-10	1.07e-08	-4.34e-08	-3.39e-10	-2.11e-10	-4.88e-07
		0.1125		0.00387656	0.0128071	0.0112816	0.0134847	0.0153578	0.012586	0.0186211	0.00752986		0.00401682	-5.43e-05	0.00394817	0.00400979	0.00385245	-0.000144424	-6.69e-05	0.0236958		4.84e-06	-4.53e-10	-4.2e-10	1.07e-08	-4.55e-08	-3.45e-10	-1.89e-10	-4.88e-07
		0.113		0.00387375	0.0128987	0.0114175	0.013611	0.0154281	0.012684	0.0188365	0.00755685		0.0040154	-4.8e-05	0.00394544	0.00400928	0.00385088	-0.000148086	-7.02e-05	0.0237084		4.91e-06	-4.56e-10	-4.12e-10	1.06e-08	-4.77e-08	-3.52e-10	-1.66e-10	-4.87e-07
		0.1135		0.00387112	0.0129892	0.0115529	0.0137381	0.0154992	0.0127809	0.0190509	0.00758423		0.00401397	-4.13e-05	0.00394272	0.00400879	0.00384945	-0.000151766	-7.37e-05	0.0237205		4.97e-06	-4.59e-10	-4.03e-10	1.05e-08	-4.99e-08	-3.58e-10	-1.42e-10	-4.86e-07
		0.114		0.00386866	0.0130787	0.0116877	0.0138661	0.015571	0.0128766	0.0192641	0.00761204		0.00401253	-3.43e-05	0.00394001	0.00400832	0.0038482	-0.00015546	-7.72e-05	0.0237321		5.03e-06	-4.61e-10	-3.93e-10	1.05e-08	-5.22e-08	-3.65e-10	-1.16e-10	-4.84e-07
		0.1145		0.00386641	0.0131672	0.0118218	0.0139948	0.0156437	0.0129711	0.019476	0.00764032		0.00401109	-2.7e-05	0.00393731	0.00400785	0.0038471	-0.000159164	-8.08e-05	0.0237432		5.09e-06	-4.63e-10	-3.82e-10	1.03e-08	-5.46e-08	-3.71e-10	-8.96e-11	-4.82e-07
		0.115		0.00386435	0.0132546	0.0119552	0.0141243	0.0157172	0.0130645	0.0196865	0.00766909		0.00400963	-1.93e-05	0.00393462	0.00400741	0.00384619	-0.000162877	-8.44e-05	0.0237539		5.15e-06	-4.65e-10	-3.7e-10	1.02e-08	-5.7e-08	-3.77e-10	-6.16e-11	-4.78e-07
		0.1155		0.00386252	0.0133409	0.0120878	0.0142544	0.0157915	0.0131567	0.0198955	0.00769839		0.00400817	-1.12e-05	0.00393195	0.00400697	0.00384545	-0.000166593	-8.82e-05	0.0237641		5.21e-06	-4.67e-10	-3.57e-10	1.01e-08	-5.94e-08	-3.84e-10	-3.22e-11	-4.75e-07
		0.116		0.00386092	0.0134262	0.0122196	0.0143851	0.0158666	0.0132477	0.020103	0.00772827		0.00400669	-2.71e-06	0.00392928	0.00400655	0.0038449	-0.000170311	-9.2e-05	0.0237739		5.26e-06	-4.68e-10	-3.44e-10	9.93e-09	-6.19e-08	-3.9e-10	-1.44e-12	-4.7e-07
		0.1165		0.00385956	0.0135104	0.0123506	0.0145164	0.0159426	0.0133375	0.0203088	0.00775875		0.00400521	6.14e-06	0.00392663	0.00400613	0.00384455	-0.000174025	-9.59e-05	0.0237832		5.31e-06	-4.68e-10	-3.29e-10	9.75e-09	-6.45e-08	-3.95e-10	3.07e-11	-4.65e-07
		0.117		0.00385845	0.0135934	0.0124806	0.0146482	0.0160195	0.0134261	0.0205128	0.00778987		0.0040037	1.54e-05	0.00392399	0.00400573	0.0038444	-0.000177732	-9.99e-05	0.0237921		5.36e-06	-4.69e-10	-3.13e-10	9.56e-09	-6.71e-08	-4.01e-10	6.43e-11	-4.6e-07
		0.1175		0.00385761	0.0136754	0.0126096	0.0147805	0.0160974	0.0135136	0.020715	0.00782167		0.00400219	2.5e-05	0.00392138	0.00400534	0.00384446	-0.000181428	-0.000104024	0.0238006		5.4e-06	-4.68e-10	-2.97e-10	9.35e-09	-6.97e-08	-4.07e-10	9.94e-11	-4.53e-07
		0.118		0.00385704	0.0137563	0.0127376	0.0149132	0.0161761	0.0135999	0.0209152	0.00785419		0.00400066	3.51e-05	0.00391877	0.00400496	0.00384474	-0.00018511	-0.000108186	0.0238087		5.44e-06	-4.67e-10	-2.79e-10	9.13e-09	-7.24e-08	-4.12e-10	1.36e-10	-4.46e-07
		0.1185		0.00385677	0.0138361	0.0128646	0.0150461	0.0162558	0.0136851	0.0211133	0.00788746		0.00399911	4.56e-05	0.00391619	0.00400459	0.00384524	-0.000188771	-0.000112428	0.0238164		5.48e-06	-4.66e-10	-2.6e-10	8.88e-09	-7.52e-08	-4.18e-10	1.74e-10	-4.38e-07
		0.119		0.0038568	0.0139148	0.0129906	0.0151794	0.0163364	0.0137691	0.0213093	0.00792153		0.00399755	5.65e-05	0.00391363	0.00400422	0.00384598	-0.000192408	-0.000116749	0.0238237		5.51e-06	-4.64e-10	-2.4e-10	8.61e-09	-7.8e-08	-4.23e-10	2.14e-10	-4.29e-07
		0.1195		0.00385715	0.0139924	0.0131154	0.0153128	0.016418	0.0138521	0.0215031	0.00795642		0.00399596	6.78e-05	0.00391109	0.00400386	0.00384695	-0.000196017	-0.000121148	0.0238306		5.54e-06	-4.62e-10	-2.19e-10	8.32e-09	-8.08e-08	-4.28e-10	2.55e-10	-4.2e-07
		0.12		0.00385783	0.0140689	0.0132391	0.0154464	0.0165006	0.0139339	0.0216945	0.00799218		0.00399436	7.96e-05	0.00390858	0.00400351	0.00384818	-0.000199591	-0.000125625	0.0238371		5.56e-06	-4.59e-10	-1.97e-10	8.02e-09	-8.37e-08	-4.33e-10	2.98e-10	-4.09e-07
		0.1205		0.00385885	0.0141444	0.0133616	0.01558	0.0165842	0.0140147	0.0218835	0.00802885		0.00399273	9.19e-05	0.00390609	0.00400317	0.00384966	-0.000203127	-0.000130179	0.0238433		5.58e-06	-4.55e-10	-1.74e-10	7.68e-09	-8.66e-08	-4.37e-10	3.42e-10	-3.98e-07
		0.121		0.00386023	0.0142188	0.013483	0.0157137	0.0166689	0.0140944	0.02207	0.00806646		0.00399108	0.000104625	0.00390362	0.00400282	0.0038514	-0.000206618	-0.000134808	0.0238491		5.6e-06	-4.51e-10	-1.49e-10	7.33e-09	-8.96e-08	-4.41e-10	3.88e-10	-3.86e-07
		0.1215		0.00386197	0.0142922	0.0136031	0.0158472	0.0167546	0.014173	0.022254	0.00810504		0.00398941	0.000117818	0.00390119	0.00400249	0.00385342	-0.000210059	-0.000139511	0.0238547		5.61e-06	-4.46e-10	-1.23e-10	6.95e-09	-9.27e-08	-4.45e-10	4.36e-10	-3.73e-07
		0.122		0.0038641	0.0143645	0.0137221	0.0159807	0.0168413	0.0142507	0.0224353	0.00814465		0.00398772	0.00013149	0.00389879	0.00400216	0.00385572	-0.000213445	-0.000144287	0.0238598		5.61e-06	-4.41e-10	-9.62e-11	6.55e-09	-9.57e-08	-4.49e-10	4.86e-10	-3.59e-07
		0.1225		0.00386662	0.0144358	0.0138398	0.016114	0.0169291	0.0143274	0.022614	0.00818531		0.00398599	0.000145652	0.00389642	0.00400183	0.00385831	-0.000216768	-0.000149135	0.0238647		5.61e-06	-4.35e-10	-6.77e-11	6.12e-09	-9.89e-08	-4.53e-10	5.37e-10	-3.43e-07
		0.123		0.00386956	0.0145062	0.0139563	0.016247	0.017018	0.0144032	0.0227899	0.00822706		0.00398424	0.000160309	0.00389409	0.0040015	0.0038612	-0.000220025	-0.000154052	0.0238693		5.6e-06	-4.28e-10	-3.78e-11	5.67e-09	-1.02e-07	-4.56e-10	5.9e-10	-3.27e-07
		0.1235		0.00387292	0.0145756	0.0140716	0.0163798	0.0171079	0.0144781	0.022963	0.00826994		0.00398247	0.000175471	0.0038918	0.00400117	0.0038644	-0.000223206	-0.000159037	0.0238735		5.59e-06	-4.2e-10	-6.52e-12	5.19e-09	-1.05e-07	-4.59e-10	6.45e-10	-3.1e-07
		0.124		0.00387671	0.014644	0.0141856	0.0165122	0.017199	0.014552	0.0231333	0.00831399		0.00398066	0.000191144	0.00388954	0.00400085	0.00386791	-0.000226308	-0.000164089	0.0238775		5.57e-06	-4.12e-10	2.62e-11	4.68e-09	-1.08e-07	-4.61e-10	7.02e-10	-2.92e-07
		0.1245		0.00388096	0.0147115	0.0142983	0.0166443	0.0172912	0.0146252	0.0233007	0.00835924		0.00397883	0.000207336	0.00388734	0.00400052	0.00387176	-0.000229321	-0.000169204	0.0238813		5.55e-06	-4.03e-10	6.04e-11	4.15e-09	-1.12e-07	-4.63e-10	7.6e-10	-2.72e-07
		0.125		0.00388568	0.0147782	0.0144098	0.0167759	0.0173845	0.0146975	0.0234652	0.00840573		0.00397696	0.000224055	0.00388517	0.0040002	0.00387594	-0.00023224	-0.00017438	0.0238847		5.52e-06	-3.93e-10	9.6e-11	3.59e-09	-1.15e-07	-4.65e-10	8.21e-10	-2.51e-07
		0.1255		0.00389087	0.0148439	0.01452	0.0169071	0.017479	0.0147691	0.0236268	0.0084535		0.00397506	0.000241307	0.00388306	0.00399987	0.00388047	-0.000235058	-0.000179616	0.023888		5.48e-06	-3.82e-10	1.33e-10	3e-09	-1.18e-07	-4.67e-10	8.84e-10	-2.3e-07
		0.126		0.00389656	0.0149088	0.014629	0.0170378	0.0175746	0.0148399	0.0237854	0.00850257		0.00397313	0.0002591	0.00388099	0.00399954	0.00388535	-0.000237766	-0.000184908	0.023891		5.43e-06	-3.7e-10	1.72e-10	2.37e-09	-1.22e-07	-4.68e-10	9.48e-10	-2.07e-07
		0.1265		0.00390276	0.0149729	0.0147367	0.017168	0.0176713	0.0149101	0.023941	0.008553		0.00397116	0.000277439	0.00387898	0.00399921	0.0038906	-0.000240357	-0.000190255	0.0238937		5.38e-06	-3.57e-10	2.12e-10	1.72e-09	-1.25e-07	-4.68e-10	1.01e-09	-1.82e-07
		0.127		0.00390949	0.0150362	0.0148431	0.0172977	0.0177692	0.0149796	0.0240937	0.0086048		0.00396916	0.000296331	0.00387703	0.00399887	0.00389622	-0.000242823	-0.000195652	0.0238963		5.32e-06	-3.44e-10	2.54e-10	1.04e-09	-1.29e-07	-4.69e-10	1.08e-09	-1.57e-07
		0.1275		0.00391675	0.0150987	0.0149483	0.0174267	0.0178682	0.0150485	0.0242433	0.00865802		0.00396713	0.000315783	0.00387514	0.00399853	0.00390223	-0.000245157	-0.000201096	0.0238987		5.25e-06	-3.29e-10	2.98e-10	3.23e-10	-1.32e-07	-4.68e-10	1.15e-09	-1.3e-07
		0.128		0.00392457	0.0151605	0.0150522	0.0175552	0.0179684	0.0151168	0.0243899	0.00871269		0.00396505	0.000335799	0.00387332	0.00399819	0.00390864	-0.000247348	-0.000206585	0.0239008		5.17e-06	-3.13e-10	3.43e-10	-4.25e-10	-1.36e-07	-4.67e-10	1.23e-09	-1.01e-07
		0.1285		0.00393296	0.0152217	0.0151548	0.0176831	0.0180697	0.0151847	0.0245335	0.00876884		0.00396294	0.000356386	0.00387156	0.00399784	0.00391545	-0.00024939	-0.000212115	0.0239029		5.08e-06	-2.97e-10	3.9e-10	-1.21e-09	-1.39e-07	-4.66e-10	1.3e-09	-7.17e-08
		0.129		0.00394193	0.0152821	0.0152563	0.0178103	0.0181722	0.015252	0.024674	0.0088265		0.00396079	0.000377549	0.00386987	0.00399748	0.00392267	-0.000251273	-0.000217683	0.0239047		4.99e-06	-2.79e-10	4.39e-10	-2.02e-09	-1.43e-07	-4.64e-10	1.38e-09	-4.06e-08
		0.1295		0.0039515	0.015342	0.0153564	0.0179369	0.0182758	0.0153189	0.0248116	0.00888571		0.00395861	0.000399292	0.00386826	0.00399711	0.00393033	-0.000252988	-0.000223283	0.0239064		4.88e-06	-2.6e-10	4.89e-10	-2.87e-09	-1.46e-07	-4.62e-10	1.46e-09	-8.05e-09
		0.13		0.00396168	0.0154012	0.0154554	0.0180628	0.0183805	0.0153855	0.0249461	0.00894649		0.00395638	0.000421619	0.00386672	0.00399674	0.00393842	-0.000254525	-0.000228912	0.023908		4.77e-06	-2.4e-10	5.42e-10	-3.76e-09	-1.5e-07	-4.59e-10	1.54e-09	2.6e-08
		0.1305		0.00397249	0.0154599	0.0155531	0.0181881	0.0184864	0.0154517	0.0250776	0.00900888		0.00395411	0.000444536	0.00386527	0.00399636	0.00394696	-0.000255875	-0.000234567	0.0239095		4.64e-06	-2.19e-10	5.96e-10	-4.68e-09	-1.53e-07	-4.55e-10	1.62e-09	6.15e-08
		0.131		0.00398395	0.0155181	0.0156497	0.0183126	0.0185933	0.0155176	0.0252061	0.00907291		0.0039518	0.000468045	0.00386391	0.00399597	0.00395595	-0.000257028	-0.000240241	0.0239108		4.51e-06	-1.97e-10	6.52e-10	-5.64e-09	-1.57e-07	-4.51e-10	1.7e-09	9.87e-08
		0.1315		0.00399607	0.0155757	0.015745	0.0184365	0.0187014	0.0155833	0.0253316	0.00913859		0.00394945	0.00049215	0.00386263	0.00399557	0.00396542	-0.000257975	-0.00024593	0.0239121		4.36e-06	-1.74e-10	7.1e-10	-6.64e-09	-1.61e-07	-4.46e-10	1.79e-09	1.37e-07
		0.132		0.00400886	0.015633	0.0158391	0.0185597	0.0188105	0.0156489	0.0254541	0.00920597		0.00394706	0.000516853	0.00386146	0.00399515	0.00397537	-0.000258704	-0.00025163	0.0239132		4.2e-06	-1.49e-10	7.69e-10	-7.68e-09	-1.64e-07	-4.41e-10	1.88e-09	1.78e-07
		0.1325		0.00402234	0.0156898	0.0159321	0.0186822	0.0189207	0.0157142	0.0255737	0.00927506		0.00394463	0.000542156	0.00386038	0.00399473	0.0039858	-0.000259204	-0.000257335	0.0239143		4.03e-06	-1.23e-10	8.31e-10	-8.76e-09	-1.68e-07	-4.35e-10	1.97e-09	2.2e-07
		0.133		0.00403653	0.0157462	0.0160239	0.0188039	0.0190319	0.0157795	0.0256903	0.0093459		0.00394215	0.000568062	0.0038594	0.00399429	0.00399674	-0.000259466	-0.000263039	0.0239154		3.85e-06	-9.62e-11	8.95e-10	-9.87e-09	-1.71e-07	-4.28e-10	2.07e-09	2.63e-07
		0.1335		0.00405144	0.0158023	0.0161145	0.018925	0.0191441	0.0158448	0.025804	0.00941849		0.00393962	0.000594572	0.00385854	0.00399384	0.00400819	-0.000259479	-0.000268737	0.0239164		3.66e-06	-6.77e-11	9.6e-10	-1.1e-08	-1.75e-07	-4.2e-10	2.16e-09	3.09e-07
		0.134		0.00406709	0.0158581	0.016204	0.0190454	0.0192574	0.01591	0.0259149	0.00949287		0.00393706	0.000621685	0.00385779	0.00399338	0.00402016	-0.000259229	-0.000274423	0.0239174		3.46e-06	-3.78e-11	1.03e-09	-1.22e-08	-1.78e-07	-4.12e-10	2.26e-09	3.56e-07
		0.1345		0.00408349	0.0159137	0.0162923	0.019165	0.0193715	0.0159754	0.0260229	0.00956906		0.00393445	0.000649403	0.00385716	0.0039929	0.00403266	-0.000258707	-0.00028009	0.0239184		3.24e-06	-6.52e-12	1.1e-09	-1.35e-08	-1.82e-07	-4.03e-10	2.36e-09	4.05e-07
		0.135		0.00410065	0.015969	0.0163795	0.019284	0.0194866	0.0160408	0.0261281	0.00964707		0.00393179	0.000677725	0.00385665	0.00399241	0.00404571	-0.0002579	-0.000285731	0.0239193		3.01e-06	2.62e-11	1.17e-09	-1.48e-08	-1.85e-07	-3.93e-10	2.46e-09	4.55e-07
		0.1355		0.0041186	0.0160241	0.0164656	0.0194022	0.0196025	0.0161064	0.0262305	0.00972692		0.00392909	0.00070665	0.00385627	0.0039919	0.00405931	-0.000256796	-0.000291341	0.0239203		2.76e-06	6.04e-11	1.24e-09	-1.61e-08	-1.89e-07	-3.82e-10	2.57e-09	5.08e-07
		0.136		0.00413734	0.0160791	0.0165506	0.0195198	0.0197193	0.0161722	0.0263301	0.00980863		0.00392635	0.000736175	0.00385603	0.00399138	0.00407348	-0.000255383	-0.000296911	0.0239213		2.5e-06	9.6e-11	1.32e-09	-1.75e-08	-1.92e-07	-3.7e-10	2.67e-09	5.62e-07
		0.1365		0.00415689	0.016134	0.0166345	0.0196366	0.0198369	0.0162383	0.026427	0.00989222		0.00392356	0.000766299	0.00385593	0.00399084	0.00408822	-0.000253647	-0.000302435	0.0239224		2.23e-06	1.33e-10	1.4e-09	-1.89e-08	-1.96e-07	-3.57e-10	2.78e-09	6.19e-07
		0.137		0.00417727	0.0161888	0.0167172	0.0197528	0.0199552	0.0163047	0.0265212	0.00997769		0.00392073	0.000797018	0.00385598	0.00399028	0.00410355	-0.000251577	-0.000307904	0.0239235		1.95e-06	1.72e-10	1.48e-09	-2.03e-08	-1.99e-07	-3.44e-10	2.89e-09	6.77e-07
		0.1375		0.00419849	0.0162436	0.0167989	0.0198682	0.0200742	0.0163715	0.0266128	0.0100651		0.00391785	0.000828328	0.00385617	0.0039897	0.00411948	-0.000249159	-0.000313311	0.0239247		1.64e-06	2.12e-10	1.56e-09	-2.18e-08	-2.03e-07	-3.29e-10	3.01e-09	7.37e-07
		0.138		0.00422056	0.0162984	0.0168796	0.019983	0.0201939	0.0164386	0.0267018	0.0101543		0.00391493	0.000860224	0.00385653	0.0039891	0.00413601	-0.000246379	-0.000318648	0.0239259		1.33e-06	2.54e-10	1.64e-09	-2.34e-08	-2.06e-07	-3.13e-10	3.12e-09	7.99e-07
		0.1385		0.0042435	0.0163532	0.0169591	0.0200971	0.0203143	0.0165063	0.0267882	0.0102455		0.00391196	0.000892701	0.00385705	0.00398849	0.00415316	-0.000243225	-0.000323905	0.0239273		9.92e-07	2.98e-10	1.73e-09	-2.5e-08	-2.09e-07	-2.97e-10	3.24e-09	8.64e-07
		0.139		0.00426733	0.0164081	0.0170376	0.0202106	0.0204352	0.0165744	0.0268721	0.0103386		0.00390895	0.000925753	0.00385774	0.00398785	0.00417094	-0.000239682	-0.000329075	0.0239287		6.43e-07	3.43e-10	1.82e-09	-2.66e-08	-2.12e-07	-2.79e-10	3.36e-09	9.3e-07
		0.1395		0.00429205	0.0164631	0.017115	0.0203233	0.0205567	0.0166431	0.0269535	0.0104336		0.0039059	0.000959372	0.00385861	0.00398719	0.00418936	-0.000235736	-0.000334147	0.0239303		2.77e-07	3.9e-10	1.91e-09	-2.83e-08	-2.15e-07	-2.6e-10	3.48e-09	9.98e-07
		0.14		0.00431768	0.0165183	0.0171914	0.0204354	0.0206787	0.0167124	0.0270325	0.0105306		0.0039028	0.00099355	0.00385966	0.00398652	0.00420842	-0.000231372	-0.000339112	0.0239321		-1.06e-07	4.39e-10	2e-09	-3.01e-08	-2.18e-07	-2.4e-10	3.6e-09	1.07e-06
		0.1405		0.00434423	0.0165737	0.0172667	0.0205468	0.0208011	0.0167824	0.0271091	0.0106294		0.00389967	0.00102828	0.0038609	0.00398582	0.00422814	-0.000226577	-0.00034396	0.023934		-5.06e-07	4.89e-10	2.1e-09	-3.19e-08	-2.21e-07	-2.19e-10	3.73e-09	1.14e-06
		0.141		0.00437172	0.0166293	0.0173409	0.0206576	0.020924	0.0168531	0.0271834	0.0107302		0.00389649	0.00106354	0.00386234	0.00398509	0.00424853	-0.000221336	-0.000348682	0.023936		-9.24e-07	5.42e-10	2.2e-09	-3.37e-08	-2.24e-07	-1.97e-10	3.85e-09	1.22e-06
		0.1415		0.00440016	0.0166851	0.0174141	0.0207677	0.0210473	0.0169245	0.0272554	0.0108329		0.00389327	0.00109934	0.00386399	0.00398435	0.00426959	-0.000215633	-0.000353266	0.0239383		-1.36e-06	5.96e-10	2.3e-09	-3.56e-08	-2.27e-07	-1.74e-10	3.98e-09	1.29e-06
		0.142		0.00442955	0.0167413	0.0174863	0.0208772	0.0211709	0.0169967	0.0273251	0.0109374		0.00389001	0.00113565	0.00386584	0.00398358	0.00429134	-0.000209453	-0.000357702	0.0239407		-1.81e-06	6.52e-10	2.4e-09	-3.76e-08	-2.29e-07	-1.49e-10	4.11e-09	1.37e-06
		0.1425		0.00445992	0.0167978	0.0175573	0.020986	0.0212947	0.0170697	0.0273926	0.0110439		0.00388671	0.00117247	0.00386792	0.00398278	0.00431378	-0.000202781	-0.000361979	0.0239433		-2.29e-06	7.1e-10	2.5e-09	-3.95e-08	-2.32e-07	-1.23e-10	4.25e-09	1.45e-06
		0.143		0.00449128	0.0168547	0.0176274	0.0210941	0.0214189	0.0171437	0.0274581	0.0111523		0.00388338	0.00120978	0.00387022	0.00398196	0.00433692	-0.000195601	-0.000366084	0.0239462		-2.78e-06	7.69e-10	2.61e-09	-4.16e-08	-2.34e-07	-9.62e-11	4.38e-09	1.54e-06
		0.1435		0.00452362	0.0169119	0.0176963	0.0212016	0.0215432	0.0172185	0.0275214	0.0112625		0.00388001	0.00124756	0.00387275	0.00398112	0.00436076	-0.000187898	-0.000370006	0.0239494		-3.29e-06	8.31e-10	2.72e-09	-4.37e-08	-2.37e-07	-6.77e-11	4.52e-09	1.62e-06
		0.144		0.00455698	0.0169696	0.0177642	0.0213085	0.0216677	0.0172943	0.0275827	0.0113747		0.0038766	0.00128579	0.00387553	0.00398025	0.00438533	-0.000179655	-0.000373734	0.0239527		-3.82e-06	8.95e-10	2.83e-09	-4.58e-08	-2.39e-07	-3.78e-11	4.66e-09	1.71e-06
		0.1445		0.00459134	0.0170277	0.017831	0.0214147	0.0217923	0.0173711	0.027642	0.0114887		0.00387316	0.00132447	0.00387855	0.00397936	0.00441062	-0.000170856	-0.000377253	0.0239564		-4.38e-06	9.6e-10	2.94e-09	-4.8e-08	-2.41e-07	-6.52e-12	4.79e-09	1.8e-06
		0.145		0.00462673	0.0170864	0.0178966	0.0215202	0.0219169	0.017449	0.0276993	0.0116046		0.00386969	0.00136357	0.00388183	0.00397844	0.00443665	-0.000161485	-0.000380551	0.0239603		-4.95e-06	1.03e-09	3.06e-09	-5.03e-08	-2.43e-07	2.62e-11	4.94e-09	1.89e-06
		0.1455		0.00466316	0.0171455	0.0179612	0.0216251	0.0220415	0.0175279	0.0277548	0.0117224		0.00386619	0.00140306	0.00388538	0.00397749	0.00446341	-0.000151525	-0.000383615	0.0239646		-5.54e-06	1.1e-09	3.18e-09	-5.26e-08	-2.44e-07	6.04e-11	5.08e-09	1.99e-06
		0.146		0.00470062	0.0172052	0.0180247	0.0217293	0.022166	0.0176079	0.0278085	0.0118421		0.00386266	0.00144294	0.0038892	0.00397651	0.00449091	-0.00014096	-0.000386431	0.0239691		-6.16e-06	1.17e-09	3.3e-09	-5.49e-08	-2.46e-07	9.6e-11	5.22e-09	2.09e-06
		0.1465		0.00473913	0.0172655	0.0180871	0.0218328	0.0222904	0.0176891	0.0278604	0.0119637		0.00385911	0.00148317	0.0038933	0.00397551	0.00451916	-0.000129773	-0.000388986	0.023974		-6.79e-06	1.24e-09	3.42e-09	-5.73e-08	-2.47e-07	1.33e-10	5.37e-09	2.19e-06
		0.147		0.0047787	0.0173263	0.0181483	0.0219356	0.0224147	0.0177715	0.0279105	0.0120872		0.00385553	0.00152373	0.00389769	0.00397448	0.00454817	-0.000117946	-0.000391263	0.0239793		-7.45e-06	1.32e-09	3.54e-09	-5.98e-08	-2.48e-07	1.72e-10	5.51e-09	2.29e-06
		0.1475		0.00481933	0.0173878	0.0182085	0.0220377	0.0225386	0.017855	0.027959	0.0122125		0.00385193	0.0015646	0.00390238	0.00397342	0.00457794	-0.000105463	-0.000393249	0.0239849		-8.13e-06	1.4e-09	3.67e-09	-6.23e-08	-2.49e-07	2.12e-10	5.66e-09	2.39e-06
		0.148		0.00486102	0.0174499	0.0182675	0.0221391	0.0226623	0.0179398	0.0280059	0.0123398		0.00384831	0.00160574	0.00390737	0.00397233	0.00460848	-9.23e-05	-0.000394929	0.0239908		-8.84e-06	1.48e-09	3.8e-09	-6.48e-08	-2.5e-07	2.54e-10	5.81e-09	2.5e-06
		0.1485		0.00490379	0.0175127	0.0183254	0.0222398	0.0227856	0.0180259	0.0280512	0.0124689		0.00384467	0.00164713	0.00391268	0.00397122	0.00463978	-7.85e-05	-0.000396286	0.0239972		-9.56e-06	1.56e-09	3.93e-09	-6.74e-08	-2.5e-07	2.98e-10	5.96e-09	2.61e-06
		0.149		0.00494763	0.0175762	0.0183822	0.0223397	0.0229085	0.0181133	0.028095	0.0125999		0.00384102	0.00168874	0.00391831	0.00397007	0.00467185	-6.39e-05	-0.000397304	0.024004		-1.03e-05	1.64e-09	4.06e-09	-7.01e-08	-2.51e-07	3.43e-10	6.11e-09	2.72e-06
		0.1495		0.00499255	0.0176403	0.0184379	0.0224389	0.0230308	0.0182019	0.0281374	0.0127328		0.00383736	0.00173054	0.00392428	0.0039689	0.0047047	-4.86e-05	-0.000397968	0.0240112		-1.11e-05	1.73e-09	4.19e-09	-7.28e-08	-2.51e-07	3.9e-10	6.26e-09	2.83e-06
		0.15		0.00503855	0.0177052	0.0184925	0.0225373	0.0231526	0.0182919	0.0281784	0.0128676		0.00383369	0.00177248	0.00393059	0.00396769	0.00473832	-3.26e-05	-0.000398261	0.0240188		-1.19e-05	1.82e-09	4.33e-09	-7.56e-08	-2.5e-07	4.39e-10	6.41e-09	2.95e-06
		0.1505		0.00508562	0.0177709	0.018546	0.0226349	0.0232737	0.0183833	0.028218	0.0130043		0.00383001	0.00181455	0.00393724	0.00396646	0.00477271	-1.58e-05	-0.000398165	0.0240269		-1.27e-05	1.91e-09	4.47e-09	-7.84e-08	-2.5e-07	4.89e-10	6.56e-09	3.06e-06
		0.151		0.00513378	0.0178372	0.0185985	0.0227316	0.0233942	0.0184761	0.0282563	0.0131429		0.00382634	0.00185669	0.00394426	0.00396519	0.00480789	1.75e-06	-0.000397663	0.0240355		-1.36e-05	2e-09	4.61e-09	-8.12e-08	-2.49e-07	5.42e-10	6.71e-09	3.18e-06
		0.1515		0.00518302	0.0179044	0.0186499	0.0228276	0.0235139	0.0185702	0.0282934	0.0132833		0.00382266	0.00189887	0.00395165	0.0039639	0.00484384	2.01e-05	-0.000396736	0.0240446		-1.44e-05	2.1e-09	4.75e-09	-8.41e-08	-2.48e-07	5.96e-10	6.86e-09	3.31e-06
		0.152		0.00523334	0.0179723	0.0187002	0.0229227	0.0236328	0.0186657	0.0283293	0.0134256		0.00381899	0.00194106	0.00395941	0.00396258	0.00488056	3.93e-05	-0.000395367	0.0240541		-1.53e-05	2.2e-09	4.89e-09	-8.71e-08	-2.47e-07	6.52e-10	7.01e-09	3.43e-06
		0.1525		0.00528472	0.018041	0.0187495	0.0230169	0.0237508	0.0187626	0.0283641	0.0135698		0.00381533	0.0019832	0.00396756	0.00396122	0.00491806	5.93e-05	-0.000393537	0.0240642		-1.62e-05	2.3e-09	5.03e-09	-9.01e-08	-2.45e-07	7.1e-10	7.16e-09	3.56e-06
		0.153		0.00533718	0.0181105	0.0187978	0.0231103	0.0238678	0.018861	0.0283977	0.0137159		0.00381168	0.00202526	0.00397611	0.00395984	0.00495632	8.01e-05	-0.000391226	0.0240748		-1.72e-05	2.4e-09	5.18e-09	-9.31e-08	-2.43e-07	7.69e-10	7.31e-09	3.69e-06
		0.1535		0.0053907	0.0181807	0.0188451	0.0232028	0.0239839	0.0189608	0.0284304	0.0138638		0.00380805	0.00206719	0.00398506	0.00395843	0.00499536	0.000101867	-0.000388416	0.0240859		-1.82e-05	2.5e-09	5.33e-09	-9.62e-08	-2.41e-07	8.31e-10	7.47e-09	3.82e-06
		0.154		0.00544528	0.0182518	0.0188914	0.0232944	0.024099	0.019062	0.0284621	0.0140135		0.00380444	0.00210895	0.00399443	0.00395698	0.00503515	0.000124472	-0.000385086	0.0240976		-1.92e-05	2.61e-09	5.47e-09	-9.93e-08	-2.38e-07	8.95e-10	7.61e-09	3.95e-06
		0.1545		0.0055009	0.0183237	0.0189367	0.0233851	0.024213	0.0191646	0.0284928	0.0141651		0.00380085	0.0021505	0.00400422	0.00395551	0.0050757	0.000147979	-0.000381215	0.0241099		-2.02e-05	2.72e-09	5.62e-09	-1.02e-07	-2.35e-07	9.6e-10	7.76e-09	4.09e-06
		0.155		0.00555757	0.0183963	0.0189811	0.023475	0.0243259	0.0192686	0.0285227	0.0143185		0.0037973	0.00219181	0.00401444	0.00395401	0.005117	0.000172404	-0.000376785	0.0241227		-2.12e-05	2.83e-09	5.77e-09	-1.06e-07	-2.32e-07	1.03e-09	7.91e-09	4.23e-06
		0.1555		0.00561525	0.0184698	0.0190246	0.0235639	0.0244376	0.019374	0.0285517	0.0144737		0.00379378	0.00223284	0.00402511	0.00395248	0.00515905	0.000197765	-0.000371772	0.0241362		-2.23e-05	2.94e-09	5.92e-09	-1.09e-07	-2.28e-07	1.1e-09	8.06e-09	4.36e-06
		0.156		0.00567395	0.018544	0.0190672	0.0236519	0.0245482	0.0194809	0.02858	0.0146306		0.0037903	0.00227356	0.00403623	0.00395092	0.00520182	0.000224078	-0.000366157	0.0241503		-2.34e-05	3.06e-09	6.08e-09	-1.12e-07	-2.24e-07	1.17e-09	8.2e-09	4.51e-06
		0.1565		0.00573365	0.018619	0.0191089	0.023739	0.0246575	0.0195891	0.0286075	0.0147894		0.00378687	0.00231394	0.00404781	0.00394933	0.00524532	0.00025136	-0.000359917	0.024165		-2.46e-05	3.18e-09	6.23e-09	-1.16e-07	-2.19e-07	1.24e-09	8.35e-09	4.65e-06
		0.157		0.00579434	0.0186947	0.0191498	0.0238252	0.0247656	0.0196987	0.0286343	0.0149498		0.0037835	0.00235394	0.00405986	0.00394772	0.00528953	0.000279628	-0.000353031	0.0241803		-2.57e-05	3.3e-09	6.38e-09	-1.19e-07	-2.14e-07	1.32e-09	8.49e-09	4.79e-06
		0.1575		0.00585598	0.0187712	0.0191899	0.0239104	0.0248724	0.0198097	0.0286605	0.015112		0.00378018	0.00239354	0.00407239	0.00394607	0.00533444	0.000308899	-0.000345475	0.0241964		-2.69e-05	3.42e-09	6.54e-09	-1.22e-07	-2.09e-07	1.4e-09	8.63e-09	4.94e-06
		0.158		0.00591857	0.0188485	0.0192291	0.0239947	0.024978	0.0199219	0.0286862	0.0152759		0.00377692	0.00243271	0.00408541	0.0039444	0.00538003	0.000339187	-0.000337227	0.024213		-2.81e-05	3.54e-09	6.69e-09	-1.26e-07	-2.03e-07	1.48e-09	8.76e-09	5.09e-06
		0.1585		0.00598209	0.0189264	0.0192676	0.0240781	0.0250823	0.0200355	0.0287113	0.0154414		0.00377373	0.00247143	0.00409892	0.0039427	0.0054263	0.000370509	-0.000328264	0.0242304		-2.93e-05	3.67e-09	6.85e-09	-1.29e-07	-1.96e-07	1.56e-09	8.9e-09	5.24e-06
		0.159		0.00604651	0.0190051	0.0193053	0.0241606	0.0251852	0.0201503	0.0287359	0.0156085		0.00377062	0.00250967	0.00411295	0.00394097	0.00547322	0.00040288	-0.000318563	0.0242485		-3.06e-05	3.8e-09	7e-09	-1.33e-07	-1.9e-07	1.64e-09	9.03e-09	5.39e-06
		0.1595		0.0061118	0.0190844	0.0193424	0.0242421	0.0252869	0.0202664	0.02876	0.0157772		0.00376759	0.00254741	0.00412749	0.00393922	0.00552077	0.000436314	-0.000308099	0.0242673		-3.19e-05	3.93e-09	7.16e-09	-1.36e-07	-1.82e-07	1.73e-09	9.16e-09	5.54e-06
		0.16		0.00617794	0.0191643	0.0193787	0.0243226	0.0253872	0.0203836	0.0287837	0.0159474		0.00376465	0.00258463	0.00414255	0.00393745	0.00556895	0.000470828	-0.00029685	0.0242868		-3.32e-05	4.06e-09	7.31e-09	-1.4e-07	-1.74e-07	1.82e-09	9.28e-09	5.7e-06
		0.1605		0.0062449	0.0192449	0.0194144	0.0244022	0.0254862	0.020502	0.0288071	0.0161191		0.00376181	0.00262131	0.00415814	0.00393565	0.00561772	0.000506434	-0.000284789	0.0243071		-3.46e-05	4.19e-09	7.47e-09	-1.43e-07	-1.66e-07	1.91e-09	9.4e-09	5.85e-06
		0.161		0.00631265	0.019326	0.0194495	0.0244808	0.0255838	0.0206215	0.0288302	0.0162922		0.00375907	0.00265744	0.00417428	0.00393382	0.00566707	0.000543147	-0.000271893	0.0243281		-3.59e-05	4.33e-09	7.62e-09	-1.47e-07	-1.57e-07	2e-09	9.52e-09	6.01e-06
		0.1615		0.00638115	0.0194077	0.0194839	0.0245585	0.0256802	0.020742	0.028853	0.0164668		0.00375644	0.00269299	0.00419097	0.00393198	0.00571697	0.000580979	-0.000258137	0.0243498		-3.73e-05	4.47e-09	7.78e-09	-1.5e-07	-1.47e-07	2.1e-09	9.63e-09	6.17e-06
		0.162		0.00645038	0.0194898	0.0195179	0.0246352	0.0257752	0.0208636	0.0288755	0.0166426		0.00375393	0.00272796	0.00420821	0.00393011	0.0057674	0.000619944	-0.000243495	0.0243724		-3.87e-05	4.61e-09	7.93e-09	-1.54e-07	-1.37e-07	2.2e-09	9.74e-09	6.33e-06
		0.1625		0.00652028	0.0195724	0.0195512	0.0247109	0.0258688	0.020986	0.0288979	0.0168197		0.00375155	0.00276232	0.00422602	0.00392822	0.00581833	0.000660053	-0.000227942	0.0243957		-4.02e-05	4.75e-09	8.08e-09	-1.57e-07	-1.26e-07	2.3e-09	9.85e-09	6.49e-06
		0.163		0.00659085	0.0196554	0.0195841	0.0247856	0.0259612	0.0211093	0.0289201	0.016998		0.0037493	0.00279607	0.00424441	0.00392631	0.00586975	0.000701319	-0.000211453	0.0244199		-4.17e-05	4.89e-09	8.23e-09	-1.61e-07	-1.15e-07	2.4e-09	9.94e-09	6.65e-06
		0.1635		0.00666203	0.0197388	0.0196166	0.0248593	0.0260522	0.0212335	0.0289422	0.0171775		0.0037472	0.00282919	0.00426337	0.00392439	0.00592164	0.000743751	-0.000194001	0.0244448		-4.32e-05	5.03e-09	8.38e-09	-1.65e-07	-1.03e-07	2.5e-09	1e-08	6.81e-06
		0.164		0.00673381	0.0198225	0.0196486	0.024932	0.0261419	0.0213584	0.0289642	0.0173579		0.00374525	0.00286167	0.00428293	0.00392244	0.00597398	0.00078736	-0.000175561	0.0244706		-4.47e-05	5.18e-09	8.53e-09	-1.68e-07	-9.04e-08	2.61e-09	1.01e-08	6.97e-06
		0.1645		0.00680615	0.0199064	0.0196802	0.0250037	0.0262304	0.0214839	0.0289862	0.0175394		0.00374346	0.00289351	0.00430308	0.00392048	0.00602674	0.000832156	-0.000156105	0.0244972		-4.62e-05	5.33e-09	8.67e-09	-1.72e-07	-7.71e-08	2.72e-09	1.02e-08	7.13e-06
		0.165		0.00687903	0.0199905	0.0197114	0.0250744	0.0263175	0.0216102	0.0290082	0.0177217		0.00374184	0.0029247	0.00432383	0.00391851	0.00607994	0.000878147	-0.000135608	0.0245246		-4.78e-05	5.47e-09	8.81e-09	-1.75e-07	-6.31e-08	2.83e-09	1.03e-08	7.29e-06
		0.1655		0.00695242	0.0200747	0.0197423	0.025144	0.0264034	0.0217369	0.0290302	0.0179048		0.0037404	0.00295522	0.00434519	0.00391652	0.00613354	0.000925341	-0.000114043	0.0245529		-4.94e-05	5.62e-09	8.96e-09	-1.79e-07	-4.84e-08	2.94e-09	1.03e-08	7.45e-06
		0.166		0.00702629	0.020159	0.019773	0.0252126	0.0264881	0.0218642	0.0290522	0.0180886		0.00373916	0.00298508	0.00436717	0.00391452	0.00618754	0.000973745	-9.14e-05	0.024582		-5.1e-05	5.77e-09	9.09e-09	-1.82e-07	-3.3e-08	3.06e-09	1.04e-08	7.62e-06
		0.1665		0.00710063	0.0202433	0.0198033	0.0252801	0.0265715	0.0219919	0.0290744	0.018273		0.00373811	0.00301426	0.00438976	0.00391251	0.00624194	0.00102337	-6.76e-05	0.024612		-5.26e-05	5.92e-09	9.23e-09	-1.86e-07	-1.69e-08	3.18e-09	1.05e-08	7.78e-06
		0.167		0.0071754	0.0203276	0.0198335	0.0253466	0.0266538	0.0221199	0.0290967	0.0184579		0.00373727	0.00304277	0.00441299	0.00391049	0.00629673	0.00107421	-4.27e-05	0.0246429		-5.43e-05	6.08e-09	9.36e-09	-1.89e-07	1.37e-11	3.3e-09	1.05e-08	7.94e-06
		0.1675		0.00725059	0.0204118	0.0198634	0.0254119	0.0267349	0.0222483	0.0291192	0.0186433		0.00373665	0.00307061	0.00443684	0.00390846	0.00635191	0.00112627	-1.66e-05	0.0246746		-5.6e-05	6.23e-09	9.49e-09	-1.93e-07	1.77e-08	3.42e-09	1.05e-08	8.1e-06
		0.168		0.00732617	0.0204958	0.0198933	0.0254762	0.0268148	0.0223768	0.0291418	0.0188289		0.00373626	0.00309776	0.00446133	0.00390643	0.00640747	0.00117957	1.07e-05	0.0247073		-5.77e-05	6.38e-09	9.61e-09	-1.96e-07	3.61e-08	3.54e-09	1.06e-08	8.26e-06
		0.1685		0.00740213	0.0205796	0.0199229	0.0255393	0.0268936	0.0225055	0.0291647	0.0190148		0.00373611	0.00312423	0.00448646	0.0039044	0.00646342	0.0012341	3.93e-05	0.0247408		-5.94e-05	6.54e-09	9.73e-09	-2e-07	5.54e-08	3.67e-09	1.06e-08	8.42e-06
		0.169		0.00747844	0.0206632	0.0199526	0.0256013	0.0269713	0.0226343	0.0291878	0.0192008		0.00373622	0.00315002	0.00451224	0.00390237	0.00651975	0.00128985	6.91e-05	0.0247752		-6.11e-05	6.69e-09	9.85e-09	-2.03e-07	7.54e-08	3.8e-09	1.06e-08	8.57e-06
		0.1695		0.00755509	0.0207466	0.0199821	0.0256623	0.0270479	0.022763	0.0292112	0.0193869		0.0037366	0.00317513	0.00453866	0.00390033	0.00657647	0.00134684	0.000100155	0.0248105		-6.29e-05	6.85e-09	9.96e-09	-2.06e-07	9.63e-08	3.93e-09	1.06e-08	8.73e-06
		0.17		0.00763205	0.0208296	0.0200117	0.0257221	0.0271234	0.0228917	0.0292349	0.0195729		0.00373724	0.00319956	0.00456573	0.00389831	0.00663358	0.00140506	0.000132544	0.0248468		-6.46e-05	7e-09	1.01e-08	-2.09e-07	1.18e-07	4.06e-09	1.06e-08	8.88e-06
		0.1705		0.00770931	0.0209122	0.0200413	0.0257807	0.027198	0.0230201	0.029259	0.0197589		0.00373818	0.00322331	0.00459346	0.00389628	0.00669109	0.00146451	0.000166272	0.0248839		-6.64e-05	7.16e-09	1.02e-08	-2.13e-07	1.41e-07	4.19e-09	1.05e-08	9.03e-06
		0.171		0.00778684	0.0209945	0.0200709	0.0258383	0.0272715	0.0231483	0.0292833	0.0199446		0.00373942	0.00324639	0.00462184	0.00389427	0.00674901	0.00152518	0.000201364	0.0249219		-6.82e-05	7.31e-09	1.03e-08	-2.16e-07	1.64e-07	4.33e-09	1.05e-08	9.18e-06
		0.1715		0.00786464	0.0210764	0.0201007	0.0258948	0.0273441	0.0232761	0.0293081	0.0201301		0.00374097	0.0032688	0.00465088	0.00389226	0.00680734	0.00158706	0.000237847	0.0249608		-7e-05	7.47e-09	1.04e-08	-2.19e-07	1.89e-07	4.47e-09	1.04e-08	9.33e-06
		0.172		0.00794268	0.0211579	0.0201306	0.0259502	0.0274158	0.0234035	0.0293332	0.0203152		0.00374285	0.00329054	0.00468057	0.00389027	0.00686609	0.00165016	0.000275747	0.0250007		-7.18e-05	7.62e-09	1.04e-08	-2.22e-07	2.14e-07	4.61e-09	1.04e-08	9.47e-06
		0.1725		0.00802095	0.0212389	0.0201607	0.0260044	0.0274865	0.0235305	0.0293587	0.0204998		0.00374507	0.00331162	0.00471092	0.00388829	0.00692527	0.00171446	0.000315091	0.0250414		-7.37e-05	7.78e-09	1.05e-08	-2.24e-07	2.4e-07	4.75e-09	1.03e-08	9.61e-06
		0.173		0.00809942	0.0213194	0.0201909	0.0260577	0.0275564	0.0236569	0.0293847	0.0206839		0.00374764	0.00333205	0.00474193	0.00388634	0.0069849	0.00177994	0.000355905	0.0250831		-7.55e-05	7.93e-09	1.06e-08	-2.27e-07	2.67e-07	4.89e-09	1.02e-08	9.75e-06
		0.1735		0.00817808	0.0213995	0.0202214	0.0261098	0.0276255	0.0237826	0.0294111	0.0208674		0.00375057	0.00335183	0.00477359	0.0038844	0.00704499	0.00184661	0.000398213	0.0251256		-7.73e-05	8.08e-09	1.06e-08	-2.3e-07	2.96e-07	5.03e-09	1.01e-08	9.88e-06
		0.174		0.00825692	0.021479	0.0202522	0.026161	0.0276938	0.0239078	0.029438	0.0210502		0.00375389	0.00337097	0.0048059	0.00388249	0.00710555	0.00191444	0.000442041	0.0251691		-7.92e-05	8.23e-09	1.07e-08	-2.32e-07	3.25e-07	5.18e-09	9.99e-09	1e-05
		0.1745		0.00833591	0.0215581	0.0202833	0.0262111	0.0277613	0.0240322	0.0294654	0.0212321		0.0037576	0.00338948	0.00483886	0.00388061	0.00716659	0.00198342	0.000487415	0.0252134		-8.11e-05	8.38e-09	1.07e-08	-2.34e-07	3.55e-07	5.33e-09	9.85e-09	1.01e-05
		0.175		0.00841504	0.0216366	0.0203148	0.0262602	0.0278281	0.0241559	0.0294932	0.0214132		0.00376172	0.00340736	0.00487246	0.00387876	0.00722814	0.00205353	0.000534358	0.0252586		-8.29e-05	8.53e-09	1.08e-08	-2.37e-07	3.86e-07	5.47e-09	9.7e-09	1.03e-05
		0.1755		0.00849429	0.0217146	0.0203466	0.0263083	0.0278942	0.0242788	0.0295215	0.0215933		0.00376626	0.00342463	0.00490671	0.00387694	0.0072902	0.00212475	0.000582894	0.0253047		-8.48e-05	8.67e-09	1.08e-08	-2.39e-07	4.18e-07	5.62e-09	9.53e-09	1.04e-05
		0.176		0.00857364	0.021792	0.0203789	0.0263555	0.0279596	0.0244008	0.0295504	0.0217724		0.00377123	0.00344129	0.00494159	0.00387516	0.0073528	0.00219707	0.000633047	0.0253517		-8.66e-05	8.81e-09	1.08e-08	-2.41e-07	4.51e-07	5.77e-09	9.34e-09	1.05e-05
		0.1765		0.00865307	0.021869	0.0204116	0.0264017	0.0280244	0.024522	0.0295797	0.0219504		0.00377666	0.00345736	0.0049771	0.00387343	0.00741595	0.00227045	0.000684839	0.0253995		-8.85e-05	8.96e-09	1.08e-08	-2.43e-07	4.86e-07	5.92e-09	9.14e-09	1.06e-05
		0.177		0.00873255	0.0219453	0.0204448	0.026447	0.0280886	0.0246423	0.0296096	0.0221272		0.00378256	0.00347284	0.00501324	0.00387174	0.00747967	0.00234488	0.000738293	0.0254482		-9.03e-05	9.09e-09	1.08e-08	-2.44e-07	5.21e-07	6.08e-09	8.92e-09	1.07e-05
		0.1775		0.00881209	0.0220212	0.0204785	0.0264915	0.0281523	0.0247617	0.02964	0.0223027		0.00378894	0.00348775	0.00504998	0.0038701	0.00754398	0.00242032	0.000793431	0.0254977		-9.22e-05	9.23e-09	1.08e-08	-2.46e-07	5.58e-07	6.23e-09	8.68e-09	1.08e-05
		0.178		0.00889164	0.0220965	0.0205127	0.0265351	0.0282154	0.0248801	0.029671	0.022477		0.00379582	0.00350211	0.00508734	0.00386851	0.0076089	0.00249674	0.000850272	0.025548		-9.4e-05	9.36e-09	1.08e-08	-2.47e-07	5.95e-07	6.38e-09	8.42e-09	1.09e-05
		0.1785		0.00897118	0.0221714	0.0205476	0.0265779	0.028278	0.0249976	0.0297025	0.02265		0.00380321	0.00351591	0.00512529	0.00386697	0.00767445	0.00257412	0.000908838	0.0255991		-9.58e-05	9.49e-09	1.08e-08	-2.48e-07	6.34e-07	6.54e-09	8.14e-09	1.1e-05
		0.179		0.0090507	0.0222457	0.020583	0.0266199	0.0283402	0.0251141	0.0297345	0.0228216		0.00381113	0.00352917	0.00516382	0.00386551	0.00774065	0.00265241	0.000969147	0.025651		-9.76e-05	9.61e-09	1.07e-08	-2.49e-07	6.73e-07	6.69e-09	7.83e-09	1.1e-05
		0.1795		0.00913018	0.0223195	0.0206191	0.0266612	0.028402	0.0252295	0.029767	0.0229918		0.0038196	0.00354192	0.00520292	0.0038641	0.00780752	0.00273159	0.00103122	0.0257037		-9.94e-05	9.73e-09	1.06e-08	-2.5e-07	7.14e-07	6.85e-09	7.51e-09	1.11e-05
		0.18		0.00920957	0.0223928	0.0206559	0.0267018	0.0284634	0.025344	0.0298001	0.0231606		0.00382863	0.00355415	0.00524259	0.00386277	0.00787508	0.00281161	0.00109507	0.0257572		-0.000101212	9.85e-09	1.06e-08	-2.5e-07	7.56e-07	7e-09	7.16e-09	1.11e-05
		0.1805		0.00928887	0.0224656	0.0206933	0.0267417	0.0285244	0.0254574	0.0298337	0.0233279		0.00383824	0.00356589	0.00528279	0.00386151	0.00794335	0.00289244	0.00116071	0.0258113		-0.000102963	9.96e-09	1.05e-08	-2.5e-07	7.99e-07	7.16e-09	6.79e-09	1.12e-05
		0.181		0.00936804	0.022538	0.0207315	0.0267809	0.0285851	0.0255698	0.0298678	0.0234937		0.00384845	0.00357715	0.00532353	0.00386034	0.00801236	0.00297405	0.00122817	0.0258662		-0.00010469	1.01e-08	1.04e-08	-2.5e-07	8.44e-07	7.31e-09	6.4e-09	1.12e-05
		0.1815		0.00944706	0.0226099	0.0207705	0.0268196	0.0286455	0.0256812	0.0299024	0.023658		0.00385927	0.00358795	0.00536477	0.00385924	0.00808212	0.0030564	0.00129745	0.0259217		-0.00010639	1.02e-08	1.03e-08	-2.5e-07	8.89e-07	7.47e-09	5.98e-09	1.13e-05
		0.182		0.00952589	0.0226814	0.0208103	0.0268577	0.0287057	0.0257916	0.0299375	0.0238208		0.00387072	0.0035983	0.00540651	0.00385824	0.00815265	0.00313947	0.00136857	0.0259779		-0.00010806	1.03e-08	1.01e-08	-2.5e-07	9.36e-07	7.62e-09	5.54e-09	1.13e-05
		0.1825		0.00960451	0.0227525	0.0208509	0.0268952	0.0287656	0.0259009	0.0299732	0.0239821		0.00388281	0.00360821	0.00544872	0.00385733	0.00822399	0.00322322	0.00144154	0.0260347		-0.000109697	1.04e-08	9.96e-09	-2.49e-07	9.84e-07	7.78e-09	5.07e-09	1.13e-05
		0.183		0.00968288	0.0228232	0.0208923	0.0269323	0.0288254	0.0260091	0.0300092	0.0241419		0.00389557	0.00361771	0.00549138	0.00385653	0.00829614	0.00330762	0.00151637	0.0260921		-0.000111297	1.04e-08	9.79e-09	-2.48e-07	1.03e-06	7.93e-09	4.58e-09	1.13e-05
		0.1835		0.00976099	0.0228935	0.0209346	0.026969	0.028885	0.0261164	0.0300458	0.0243002		0.00390902	0.0036268	0.00553447	0.00385583	0.00836912	0.00339265	0.00159307	0.0261501		-0.000112857	1.05e-08	9.6e-09	-2.46e-07	1.08e-06	8.08e-09	4.06e-09	1.13e-05
		0.184		0.0098388	0.0229635	0.0209778	0.0270053	0.0289444	0.0262226	0.0300828	0.0244569		0.00392316	0.00363552	0.00557797	0.00385524	0.00844297	0.00347827	0.00167164	0.0262086		-0.000114375	1.06e-08	9.4e-09	-2.45e-07	1.13e-06	8.23e-09	3.51e-09	1.13e-05
		0.1845		0.0099163	0.0230332	0.0210219	0.0270413	0.0290038	0.0263278	0.0301202	0.0246122		0.00393802	0.00364386	0.00562185	0.00385477	0.0085177	0.00356446	0.0017521	0.0262675		-0.000115846	1.06e-08	9.17e-09	-2.43e-07	1.19e-06	8.38e-09	2.93e-09	1.12e-05
		0.185		0.00999346	0.0231026	0.0210669	0.0270769	0.029063	0.026432	0.030158	0.0247659		0.00395361	0.00365186	0.00566608	0.00385442	0.00859333	0.00365119	0.00183444	0.0263269		-0.000117267	1.07e-08	8.93e-09	-2.4e-07	1.24e-06	8.53e-09	2.32e-09	1.12e-05
		0.1855		0.0100703	0.0231717	0.0211129	0.0271124	0.0291222	0.0265352	0.0301962	0.0249182		0.00396996	0.00365953	0.00571063	0.0038542	0.00866987	0.00373844	0.00191868	0.0263868		-0.000118634	1.07e-08	8.66e-09	-2.38e-07	1.3e-06	8.67e-09	1.69e-09	1.11e-05
		0.186		0.0101467	0.0232406	0.0211599	0.0271476	0.0291814	0.0266374	0.0302348	0.025069		0.00398707	0.00366689	0.00575548	0.00385412	0.00874735	0.00382616	0.0020048	0.026447		-0.000119943	1.08e-08	8.38e-09	-2.35e-07	1.35e-06	8.81e-09	1.02e-09	1.1e-05
		0.1865		0.0102228	0.0233092	0.0212079	0.0271827	0.0292405	0.0267386	0.0302737	0.0252184		0.00400497	0.00367395	0.0058006	0.00385418	0.00882578	0.00391435	0.00209281	0.0265076		-0.000121191	1.08e-08	8.07e-09	-2.31e-07	1.41e-06	8.96e-09	3.2e-10	1.09e-05
		0.187		0.0102984	0.0233777	0.0212569	0.0272177	0.0292997	0.0268389	0.0303129	0.0253663		0.00402368	0.00368074	0.00584594	0.00385438	0.00890519	0.00400298	0.00218271	0.0265685		-0.000122374	1.08e-08	7.75e-09	-2.27e-07	1.47e-06	9.09e-09	-4.11e-10	1.08e-05
		0.1875		0.0103737	0.023446	0.021307	0.0272526	0.0293589	0.0269383	0.0303525	0.0255128		0.00404322	0.00368728	0.00589147	0.00385474	0.00898559	0.00409201	0.00227449	0.0266297		-0.000123486	1.08e-08	7.39e-09	-2.23e-07	1.53e-06	9.23e-09	-1.17e-09	1.07e-05
		0.188		0.0104486	0.0235141	0.0213581	0.0272876	0.0294182	0.0270367	0.0303923	0.025658		0.00406359	0.00369358	0.00593717	0.00385527	0.00906698	0.00418143	0.00236815	0.0266912		-0.000124525	1.08e-08	7.02e-09	-2.18e-07	1.59e-06	9.36e-09	-1.97e-09	1.05e-05
		0.1885		0.010523	0.0235822	0.0214103	0.0273226	0.0294775	0.0271343	0.0304325	0.0258019		0.00408482	0.00369967	0.00598299	0.00385596	0.0091494	0.0042712	0.00246366	0.0267529		-0.000125484	1.08e-08	6.62e-09	-2.13e-07	1.65e-06	9.49e-09	-2.8e-09	1.04e-05
		0.189		0.010597	0.0236502	0.0214636	0.0273577	0.029537	0.027231	0.0304729	0.0259444		0.00410693	0.00370556	0.0060289	0.00385682	0.00923285	0.0043613	0.00256104	0.0268148		-0.000126361	1.08e-08	6.2e-09	-2.08e-07	1.71e-06	9.61e-09	-3.67e-09	1.02e-05
		0.1895		0.0106706	0.0237182	0.021518	0.027393	0.0295965	0.0273268	0.0305137	0.0260857		0.00412993	0.00371128	0.00607487	0.00385787	0.00931734	0.00445171	0.00266025	0.026877		-0.00012715	1.08e-08	5.75e-09	-2.02e-07	1.78e-06	9.73e-09	-4.57e-09	1e-05
		0.19		0.0107437	0.0237861	0.0215735	0.0274285	0.0296562	0.0274218	0.0305547	0.0262258		0.00415385	0.00371684	0.00612087	0.00385911	0.00940289	0.00454239	0.00276128	0.0269393		-0.000127847	1.07e-08	5.27e-09	-1.95e-07	1.84e-06	9.85e-09	-5.51e-09	9.8e-06
		0.1905		0.0108164	0.0238541	0.0216301	0.0274644	0.029716	0.027516	0.030596	0.0263646		0.00417869	0.00372228	0.00616688	0.00386055	0.0094895	0.00463332	0.00286412	0.0270018		-0.000128446	1.06e-08	4.77e-09	-1.88e-07	1.91e-06	9.96e-09	-6.48e-09	9.57e-06
		0.191		0.0108887	0.0239222	0.0216878	0.0275005	0.029776	0.0276093	0.0306376	0.0265023		0.00420448	0.0037276	0.00621286	0.00386219	0.00957719	0.00472447	0.00296873	0.0270645		-0.000128943	1.06e-08	4.24e-09	-1.81e-07	1.98e-06	1.01e-08	-7.5e-09	9.32e-06
		0.1915		0.0109605	0.0239903	0.0217466	0.027537	0.0298361	0.027702	0.0306794	0.026639		0.00423124	0.00373284	0.0062588	0.00386404	0.00966596	0.00481582	0.00307511	0.0271272		-0.000129333	1.05e-08	3.68e-09	-1.73e-07	2.05e-06	1.02e-08	-8.55e-09	9.04e-06
		0.192		0.0110319	0.0240585	0.0218066	0.027574	0.0298964	0.0277939	0.0307215	0.0267745		0.00425897	0.00373801	0.00630467	0.00386612	0.00975581	0.00490733	0.00318321	0.0271901		-0.000129609	1.04e-08	3.1e-09	-1.64e-07	2.12e-06	1.03e-08	-9.64e-09	8.74e-06
		0.1925		0.0111029	0.0241269	0.0218677	0.0276115	0.0299569	0.027885	0.0307639	0.0269091		0.0042877	0.00374313	0.00635045	0.00386842	0.00984676	0.00499897	0.00329301	0.027253		-0.000129767	1.03e-08	2.48e-09	-1.55e-07	2.19e-06	1.04e-08	-1.08e-08	8.43e-06
		0.193		0.0111734	0.0241955	0.02193	0.0276495	0.0300175	0.0279755	0.0308066	0.0270426		0.00431745	0.00374824	0.00639613	0.00387096	0.0099388	0.00509072	0.00340448	0.0273161		-0.000129802	1.01e-08	1.83e-09	-1.46e-07	2.26e-06	1.04e-08	-1.19e-08	8.09e-06
		0.1935		0.0112436	0.0242643	0.0219934	0.0276882	0.0300783	0.0280653	0.0308495	0.0271753		0.00434822	0.00375334	0.00644169	0.00387374	0.0100319	0.00518254	0.00351757	0.0273792		-0.000129707	9.96e-09	1.15e-09	-1.35e-07	2.33e-06	1.05e-08	-1.32e-08	7.72e-06
		0.194		0.0113133	0.0243334	0.022058	0.0277275	0.0301393	0.0281545	0.0308928	0.0273071		0.00438004	0.00375847	0.0064871	0.00387678	0.0101262	0.00527439	0.00363225	0.0274423		-0.000129477	9.79e-09	4.43e-10	-1.25e-07	2.4e-06	1.06e-08	-1.44e-08	7.33e-06
		0.1945		0.0113826	0.0244027	0.0221236	0.0277676	0.0302005	0.028243	0.0309363	0.027438		0.00441292	0.00376365	0.00653237	0.00388008	0.0102215	0.00536625	0.00374847	0.0275055		-0.000129105	9.6e-09	-3e-10	-1.13e-07	2.48e-06	1.06e-08	-1.57e-08	6.92e-06
		0.195		0.0114515	0.0244724	0.0221904	0.0278085	0.0302619	0.0283309	0.0309802	0.0275682		0.00444687	0.00376889	0.00657747	0.00388364	0.0103179	0.00545808	0.0038662	0.0275687		-0.000128587	9.4e-09	-1.08e-09	-1.01e-07	2.55e-06	1.07e-08	-1.7e-08	6.48e-06
		0.1955		0.01152	0.0245423	0.0222583	0.0278502	0.0303234	0.0284183	0.0310243	0.0276977		0.00448192	0.00377424	0.0066224	0.00388749	0.0104153	0.00554984	0.00398536	0.0276319		-0.000127915	9.17e-09	-1.89e-09	-8.82e-08	2.63e-06	1.07e-08	-1.84e-08	6.01e-06
		0.196		0.0115881	0.0246127	0.0223274	0.0278929	0.0303851	0.0285051	0.0310688	0.0278265		0.00451806	0.0037797	0.00666714	0.00389163	0.0105139	0.0056415	0.00410592	0.027695		-0.000127083	8.93e-09	-2.73e-09	-7.48e-08	2.71e-06	1.08e-08	-1.99e-08	5.51e-06
		0.1965		0.0116559	0.0246834	0.0223975	0.0279365	0.0304469	0.0285914	0.0311136	0.0279547		0.00455533	0.0037853	0.00671169	0.00389606	0.0106134	0.00573301	0.00422782	0.0277582		-0.000126086	8.66e-09	-3.62e-09	-6.07e-08	2.79e-06	1.08e-08	-2.13e-08	4.99e-06
		0.197		0.0117233	0.0247546	0.0224687	0.0279812	0.0305089	0.0286772	0.0311587	0.0280823		0.00459373	0.00379107	0.00675603	0.0039008	0.0107141	0.00582434	0.00435098	0.0278214		-0.000124916	8.38e-09	-4.53e-09	-4.59e-08	2.86e-06	1.08e-08	-2.28e-08	4.44e-06
		0.1975		0.0117903	0.0248263	0.0225409	0.0280269	0.0305711	0.0287626	0.0312042	0.0282094		0.00463327	0.00379703	0.00680018	0.00390585	0.0108157	0.00591546	0.00447534	0.0278845		-0.000123566	8.07e-09	-5.49e-09	-3.04e-08	2.94e-06	1.08e-08	-2.44e-08	3.86e-06
		0.198		0.011857	0.0248984	0.0226142	0.0280738	0.0306334	0.0288474	0.0312501	0.0283361		0.00467397	0.00380321	0.00684411	0.00391123	0.0109184	0.00600632	0.00460084	0.0279475		-0.000122031	7.75e-09	-6.48e-09	-1.42e-08	3.02e-06	1.08e-08	-2.6e-08	3.25e-06
		0.1985		0.0119233	0.024971	0.0226885	0.0281219	0.0306958	0.0289318	0.0312963	0.0284623		0.00471584	0.00380963	0.00688783	0.00391694	0.011022	0.00609691	0.0047274	0.0280105		-0.000120303	7.39e-09	-7.51e-09	2.85e-09	3.1e-06	1.08e-08	-2.77e-08	2.61e-06
		0.199		0.0119893	0.0250442	0.0227638	0.0281713	0.0307584	0.0290158	0.0313429	0.0285882		0.00475888	0.00381632	0.00693133	0.00392299	0.0111266	0.00618719	0.00485494	0.0280735		-0.000118374	7.02e-09	-8.59e-09	2.06e-08	3.19e-06	1.08e-08	-2.94e-08	1.94e-06
		0.1995		0.012055	0.0251179	0.0228401	0.028222	0.0308212	0.0290994	0.03139	0.0287137		0.00480312	0.0038233	0.00697462	0.00392939	0.0112321	0.00627713	0.00498337	0.0281363		-0.000116239	6.62e-09	-9.7e-09	3.92e-08	3.27e-06	1.08e-08	-3.11e-08	1.23e-06
		0.2		0.0121204	0.0251923	0.0229174	0.0282742	0.0308841	0.0291827	0.0314375	0.028839		0.00484855	0.0038306	0.00701769	0.00393616	0.0113385	0.00636671	0.0051126	0.0281991		-0.000113889	6.2e-09	-1.08e-08	5.85e-08	3.35e-06	1.07e-08	-3.29e-08	4.9e-07
		0.2005		0.0121855	0.0252672	0.0229956	0.0283277	0.0309471	0.0292655	0.0314854	0.0289641		0.00489519	0.00383824	0.00706055	0.0039433	0.0114457	0.00645591	0.00524255	0.0282617		-0.000111318	5.75e-09	-1.2e-08	7.87e-08	3.43e-06	1.06e-08	-3.48e-08	-2.83e-07
		0.201		0.0122502	0.0253428	0.0230747	0.0283828	0.0310103	0.029348	0.0315338	0.0290891		0.00494304	0.00384624	0.00710319	0.00395082	0.0115538	0.0065447	0.00537312	0.0283242		-0.000108517	5.27e-09	-1.33e-08	9.97e-08	3.51e-06	1.06e-08	-3.67e-08	-1.09e-06
		0.2015		0.0123147	0.025419	0.0231547	0.0284395	0.0310737	0.0294302	0.0315826	0.0292139		0.00499212	0.00385465	0.00714562	0.00395873	0.0116626	0.00663306	0.0055042	0.0283866		-0.00010548	4.77e-09	-1.46e-08	1.22e-07	3.6e-06	1.05e-08	-3.86e-08	-1.94e-06
		0.202		0.012379	0.0254959	0.0232356	0.0284977	0.0311373	0.0295121	0.031632	0.0293386		0.00504242	0.00386347	0.00718785	0.00396705	0.0117722	0.00672098	0.00563573	0.0284489		-0.000102199	4.24e-09	-1.59e-08	1.44e-07	3.68e-06	1.04e-08	-4.06e-08	-2.82e-06
		0.2025		0.012443	0.0255735	0.0233174	0.0285577	0.0312011	0.0295936	0.0316818	0.0294634		0.00509395	0.00387275	0.00722987	0.00397577	0.0118825	0.00680843	0.00576758	0.028511		-9.87e-05	3.68e-09	-1.72e-08	1.68e-07	3.76e-06	1.03e-08	-4.27e-08	-3.73e-06
		0.203		0.0125067	0.0256518	0.0234001	0.0286194	0.031265	0.0296749	0.0317322	0.0295881		0.00514673	0.0038825	0.0072717	0.00398491	0.0119935	0.0068954	0.00589969	0.0285729		-9.49e-05	3.1e-09	-1.86e-08	1.93e-07	3.85e-06	1.01e-08	-4.48e-08	-4.69e-06
		0.2035		0.0125702	0.0257308	0.0234836	0.0286829	0.0313292	0.0297559	0.0317832	0.0297129		0.00520073	0.00389274	0.00731333	0.00399449	0.012105	0.00698187	0.00603197	0.0286347		-9.08e-05	2.48e-09	-2.01e-08	2.18e-07	3.93e-06	9.96e-09	-4.69e-08	-5.68e-06
		0.204		0.0126334	0.0258105	0.023568	0.0287482	0.0313936	0.0298365	0.0318347	0.0298378		0.00525599	0.00390352	0.00735479	0.0040045	0.0122172	0.00706784	0.00616432	0.0286963		-8.65e-05	1.83e-09	-2.16e-08	2.44e-07	4.01e-06	9.79e-09	-4.91e-08	-6.72e-06
		0.2045		0.0126964	0.025891	0.0236532	0.0288155	0.0314582	0.0299169	0.0318869	0.0299629		0.00531248	0.00391485	0.00739606	0.00401497	0.0123299	0.00715328	0.00629666	0.0287577		-8.18e-05	1.15e-09	-2.32e-08	2.72e-07	4.09e-06	9.6e-09	-5.13e-08	-7.79e-06
		0.205		0.0127592	0.0259722	0.0237392	0.0288847	0.031523	0.0299971	0.0319396	0.0300882		0.00537022	0.00392676	0.00743717	0.00402589	0.0124431	0.00723818	0.00642893	0.0288188		-7.69e-05	4.43e-10	-2.47e-08	3e-07	4.18e-06	9.4e-09	-5.36e-08	-8.9e-06
		0.2055		0.0128218	0.0260542	0.0238261	0.028956	0.0315881	0.0300769	0.031993	0.0302136		0.00542919	0.00393928	0.00747812	0.00403729	0.0125567	0.00732254	0.00656103	0.0288797		-7.17e-05	-3e-10	-2.64e-08	3.29e-07	4.26e-06	9.17e-09	-5.6e-08	-1.01e-05
		0.206		0.0128842	0.026137	0.0239137	0.0290293	0.0316535	0.0301565	0.032047	0.0303393		0.00548941	0.00395244	0.00751891	0.00404917	0.0126708	0.00740634	0.00669288	0.0289404		-6.62e-05	-1.08e-09	-2.81e-08	3.6e-07	4.34e-06	8.93e-09	-5.84e-08	-1.13e-05
		0.2065		0.0129463	0.0262206	0.0240022	0.0291047	0.0317191	0.0302358	0.0321017	0.0304653		0.00555085	0.00396625	0.00755957	0.00406153	0.0127852	0.00748957	0.00682442	0.0290008		-6.03e-05	-1.89e-09	-2.98e-08	3.91e-07	4.42e-06	8.66e-09	-6.08e-08	-1.25e-05
		0.207		0.0130083	0.0263049	0.0240914	0.0291823	0.0317851	0.0303149	0.032157	0.0305917		0.00561352	0.00398076	0.0076001	0.0040744	0.0129	0.00757222	0.00695557	0.0290609		-5.42e-05	-2.73e-09	-3.16e-08	4.23e-07	4.5e-06	8.38e-09	-6.33e-08	-1.38e-05
		0.2075		0.01307	0.02639	0.0241814	0.0292622	0.0318514	0.0303936	0.0322131	0.0307183		0.00567741	0.00399598	0.0076405	0.00408777	0.013015	0.00765428	0.00708625	0.0291207		-4.77e-05	-3.62e-09	-3.34e-08	4.57e-07	4.58e-06	8.07e-09	-6.59e-08	-1.51e-05
		0.208		0.0131316	0.0264758	0.0242721	0.0293443	0.0319179	0.0304721	0.03227	0.0308453		0.00574251	0.00401195	0.0076808	0.00410167	0.0131303	0.00773574	0.00721639	0.0291802		-4.08e-05	-4.53e-09	-3.53e-08	4.91e-07	4.65e-06	7.75e-09	-6.85e-08	-1.65e-05
		0.2085		0.013193	0.0265625	0.0243637	0.0294287	0.0319849	0.0305503	0.0323275	0.0309727		0.0058088	0.00402869	0.007721	0.00411609	0.0132458	0.00781661	0.00734594	0.0292393		-3.36e-05	-5.49e-09	-3.73e-08	5.27e-07	4.73e-06	7.39e-09	-7.11e-08	-1.79e-05
		0.209		0.0132541	0.0266499	0.0244559	0.0295155	0.0320521	0.0306281	0.0323859	0.0311006		0.00587628	0.00404623	0.00776112	0.00413105	0.0133615	0.00789685	0.00747483	0.0292981		-2.61e-05	-6.48e-09	-3.92e-08	5.63e-07	4.81e-06	7.02e-09	-7.38e-08	-1.94e-05
		0.2095		0.0133151	0.026738	0.0245489	0.0296047	0.0321198	0.0307056	0.032445	0.0312288		0.00594494	0.00406459	0.00780116	0.00414656	0.0134772	0.00797648	0.00760301	0.0293564		-1.81e-05	-7.51e-09	-4.13e-08	6.01e-07	4.88e-06	6.62e-09	-7.65e-08	-2.09e-05
		0.21		0.0133758	0.0268269	0.0246426	0.0296964	0.0321878	0.0307828	0.032505	0.0313574		0.00601475	0.0040838	0.00784114	0.00416262	0.013593	0.00805548	0.00773042	0.0294144		-9.82e-06	-8.59e-09	-4.34e-08	6.4e-07	4.95e-06	6.2e-09	-7.93e-08	-2.25e-05
		0.2105		0.0134364	0.0269165	0.024737	0.0297906	0.0322562	0.0308597	0.0325657	0.0314866		0.0060857	0.0041039	0.00788107	0.00417926	0.0137089	0.00813384	0.00785703	0.0294718		-1.12e-06	-9.7e-09	-4.55e-08	6.8e-07	5.02e-06	5.75e-09	-8.22e-08	-2.41e-05
		0.211		0.0134967	0.0270068	0.0248321	0.0298873	0.032325	0.0309361	0.0326273	0.0316161		0.00615776	0.0041249	0.00792096	0.00419646	0.0138246	0.00821156	0.00798278	0.0295289		7.97e-06	-1.08e-08	-4.77e-08	7.21e-07	5.09e-06	5.27e-09	-8.5e-08	-2.57e-05
		0.2115		0.0135569	0.0270978	0.0249279	0.0299865	0.0323943	0.0310123	0.0326898	0.0317461		0.00623092	0.00414683	0.00796083	0.00421425	0.0139403	0.00828863	0.00810764	0.0295854		1.75e-05	-1.2e-08	-4.99e-08	7.63e-07	5.16e-06	4.77e-09	-8.8e-08	-2.74e-05
		0.212		0.0136167	0.0271894	0.0250243	0.0300884	0.032464	0.031088	0.0327532	0.0318766		0.00630516	0.00416973	0.0080007	0.00423264	0.0140558	0.00836503	0.00823157	0.0296414		2.74e-05	-1.33e-08	-5.22e-08	8.06e-07	5.22e-06	4.24e-09	-9.09e-08	-2.92e-05
		0.2125		0.0136764	0.0272817	0.0251214	0.030193	0.0325341	0.0311634	0.0328174	0.0320075		0.00638044	0.00419361	0.00804056	0.00425162	0.0141712	0.00844077	0.00835455	0.0296968		3.77e-05	-1.46e-08	-5.46e-08	8.5e-07	5.28e-06	3.68e-09	-9.39e-08	-3.1e-05
		0.213		0.0137358	0.0273746	0.0252192	0.0303002	0.0326047	0.0312384	0.0328825	0.0321389		0.00645673	0.00421851	0.00808044	0.00427121	0.0142862	0.00851582	0.00847655	0.0297516		4.85e-05	-1.59e-08	-5.7e-08	8.96e-07	5.34e-06	3.1e-09	-9.7e-08	-3.29e-05
		0.2135		0.013795	0.0274681	0.0253175	0.0304101	0.0326758	0.031313	0.0329486	0.0322706		0.00653402	0.00424444	0.00812034	0.00429142	0.0144009	0.0085902	0.00859755	0.0298058		5.97e-05	-1.72e-08	-5.94e-08	9.43e-07	5.4e-06	2.48e-09	-1e-07	-3.48e-05
		0.214		0.0138538	0.0275621	0.0254165	0.0305228	0.0327474	0.0313872	0.0330156	0.0324028		0.00661226	0.00427144	0.00816028	0.00431225	0.0145153	0.00866387	0.00871752	0.0298594		7.14e-05	-1.86e-08	-6.19e-08	9.91e-07	5.45e-06	1.83e-09	-1.03e-07	-3.67e-05
		0.2145		0.0139124	0.0276566	0.025516	0.0306382	0.0328194	0.0314611	0.0330835	0.0325354		0.00669141	0.00429954	0.00820028	0.00433371	0.0146292	0.00873684	0.00883645	0.0299122		8.35e-05	-2.01e-08	-6.45e-08	1.04e-06	5.5e-06	1.15e-09	-1.06e-07	-3.88e-05
		0.215		0.0139707	0.0277517	0.0256161	0.0307565	0.032892	0.0315345	0.0331525	0.0326684		0.00677145	0.00432874	0.00824035	0.00435582	0.0147426	0.00880909	0.00895432	0.0299644		9.6e-05	-2.16e-08	-6.71e-08	1.09e-06	5.55e-06	4.43e-10	-1.1e-07	-4.08e-05
		0.2155		0.0140286	0.0278472	0.0257168	0.0308775	0.0329651	0.0316076	0.0332223	0.0328017		0.00685233	0.0043591	0.00828049	0.00437856	0.0148555	0.0088806	0.00907113	0.0300159		0.000109104	-2.32e-08	-6.97e-08	1.14e-06	5.59e-06	-3e-10	-1.13e-07	-4.29e-05
		0.216		0.0140862	0.0279431	0.0258179	0.0310013	0.0330387	0.0316803	0.0332932	0.0329353		0.006934	0.00439061	0.00832071	0.00440196	0.0149678	0.00895138	0.00918687	0.0300667		0.000122642	-2.47e-08	-7.24e-08	1.19e-06	5.63e-06	-1.08e-09	-1.16e-07	-4.51e-05
		0.2165		0.0141435	0.0280395	0.0259196	0.0311281	0.0331129	0.0317526	0.033365	0.0330692		0.00701641	0.00442332	0.00836105	0.00442602	0.0150794	0.0090214	0.00930153	0.0301167		0.000136671	-2.64e-08	-7.52e-08	1.25e-06	5.67e-06	-1.89e-09	-1.19e-07	-4.73e-05
		0.217		0.0142005	0.0281362	0.0260217	0.0312576	0.0331876	0.0318245	0.0334378	0.0332033		0.00709953	0.00445725	0.00840149	0.00445074	0.0151904	0.00909065	0.00941511	0.0301659		0.0001512	-2.81e-08	-7.8e-08	1.3e-06	5.7e-06	-2.73e-09	-1.23e-07	-4.96e-05
		0.2175		0.0142571	0.0282333	0.0261242	0.03139	0.0332628	0.031896	0.0335117	0.0333376		0.0071833	0.00449242	0.00844206	0.00447613	0.0153007	0.00915912	0.00952762	0.0302144		0.000166235	-2.98e-08	-8.08e-08	1.36e-06	5.73e-06	-3.62e-09	-1.26e-07	-5.2e-05
		0.218		0.0143133	0.0283307	0.0262272	0.0315253	0.0333386	0.0319672	0.0335865	0.033472		0.00726766	0.00452885	0.00848275	0.00450219	0.0154101	0.00922678	0.00963906	0.0302621		0.000181787	-3.16e-08	-8.37e-08	1.42e-06	5.75e-06	-4.53e-09	-1.3e-07	-5.43e-05
		0.2185		0.0143692	0.0284285	0.0263305	0.0316635	0.033415	0.0320379	0.0336623	0.0336064		0.00735256	0.00456656	0.0085236	0.00452893	0.0155188	0.00929363	0.00974942	0.030309		0.000197861	-3.34e-08	-8.66e-08	1.48e-06	5.77e-06	-5.49e-09	-1.33e-07	-5.68e-05
		0.219		0.0144247	0.0285265	0.0264341	0.0318045	0.0334919	0.0321083	0.0337392	0.0337409		0.00743793	0.00460558	0.0085646	0.00455635	0.0156265	0.00935964	0.00985873	0.0303552		0.000214466	-3.53e-08	-8.96e-08	1.54e-06	5.79e-06	-6.48e-09	-1.36e-07	-5.93e-05
		0.2195		0.0144799	0.0286248	0.0265381	0.0319485	0.0335694	0.0321782	0.033817	0.0338754		0.00752371	0.00464594	0.00860576	0.00458446	0.0157334	0.00942479	0.00996699	0.0304005		0.000231608	-3.73e-08	-9.27e-08	1.6e-06	5.79e-06	-7.51e-09	-1.4e-07	-6.18e-05
		0.22		0.0145348	0.0287232	0.0266423	0.0320952	0.0336474	0.0322478	0.0338959	0.0340096		0.00760983	0.00468764	0.0086471	0.00461325	0.0158393	0.00948906	0.0100742	0.030445		0.000249296	-3.92e-08	-9.57e-08	1.66e-06	5.8e-06	-8.59e-09	-1.43e-07	-6.44e-05
		0.2205		0.0145893	0.0288219	0.0267467	0.0322449	0.033726	0.0323171	0.0339757	0.0341437		0.00769624	0.00473072	0.00868861	0.00464273	0.0159442	0.00955243	0.0101804	0.0304888		0.000267536	-4.13e-08	-9.89e-08	1.72e-06	5.79e-06	-9.7e-09	-1.47e-07	-6.71e-05
		0.221		0.0146434	0.0289208	0.0268513	0.0323973	0.0338052	0.0323859	0.0340566	0.0342775		0.00778287	0.00477519	0.00873031	0.0046729	0.0160481	0.00961487	0.0102856	0.0305317		0.000286334	-4.34e-08	-1.02e-07	1.79e-06	5.79e-06	-1.08e-08	-1.5e-07	-6.98e-05
		0.2215		0.0146973	0.0290198	0.026956	0.0325526	0.0338848	0.0324543	0.0341384	0.0344109		0.00786966	0.00482107	0.00877221	0.00470377	0.0161508	0.00967637	0.0103898	0.0305738		0.000305697	-4.55e-08	-1.05e-07	1.85e-06	5.77e-06	-1.2e-08	-1.54e-07	-7.25e-05
		0.222		0.0147508	0.0291189	0.0270608	0.0327106	0.0339651	0.0325224	0.0342212	0.0345439		0.00795654	0.00486838	0.0088143	0.00473533	0.0162525	0.00973689	0.0104931	0.0306152		0.000325632	-4.77e-08	-1.08e-07	1.92e-06	5.75e-06	-1.33e-08	-1.57e-07	-7.54e-05
		0.2225		0.014804	0.029218	0.0271657	0.0328715	0.0340458	0.0325901	0.034305	0.0346763		0.00804344	0.00491713	0.00885661	0.00476757	0.0163529	0.00979642	0.0105954	0.0306557		0.000346143	-4.99e-08	-1.12e-07	1.99e-06	5.72e-06	-1.46e-08	-1.61e-07	-7.82e-05
		0.223		0.0148569	0.0293172	0.0272706	0.033035	0.0341271	0.0326574	0.0343897	0.0348081		0.00813033	0.00496735	0.00889912	0.00480051	0.0164522	0.00985493	0.0106967	0.0306955		0.000367237	-5.22e-08	-1.15e-07	2.06e-06	5.69e-06	-1.59e-08	-1.64e-07	-8.11e-05
		0.2235		0.0149095	0.0294164	0.0273754	0.0332013	0.0342089	0.0327243	0.0344753	0.0349392		0.00821711	0.00501905	0.00894185	0.00483414	0.0165502	0.00991242	0.0107972	0.0307344		0.000388919	-5.46e-08	-1.18e-07	2.13e-06	5.64e-06	-1.72e-08	-1.68e-07	-8.41e-05
		0.224		0.0149619	0.0295156	0.0274803	0.0333702	0.0342911	0.0327908	0.0345619	0.0350695		0.00830374	0.00507224	0.00898479	0.00486846	0.0166468	0.00996887	0.0108968	0.0307726		0.000411193	-5.7e-08	-1.22e-07	2.2e-06	5.59e-06	-1.86e-08	-1.71e-07	-8.71e-05
		0.2245		0.015014	0.0296147	0.027585	0.0335417	0.0343739	0.0328569	0.0346494	0.035199		0.00839015	0.00512694	0.00902796	0.00490345	0.0167422	0.0100243	0.0109956	0.0308101		0.000434064	-5.94e-08	-1.25e-07	2.27e-06	5.54e-06	-2.01e-08	-1.75e-07	-9.02e-05
		0.225		0.0150659	0.0297138	0.0276896	0.0337157	0.034457	0.0329226	0.0347377	0.0353274		0.00847628	0.00518317	0.00907134	0.00493913	0.0168362	0.0100786	0.0110935	0.0308468		0.000457536	-6.19e-08	-1.29e-07	2.34e-06	5.47e-06	-2.16e-08	-1.78e-07	-9.33e-05
		0.2255		0.0151175	0.0298128	0.0277941	0.0338923	0.0345407	0.032988	0.0348269	0.0354548		0.00856206	0.00524092	0.00911494	0.00497548	0.0169288	0.0101318	0.0111907	0.0308827		0.000481612	-6.45e-08	-1.32e-07	2.41e-06	5.39e-06	-2.32e-08	-1.82e-07	-9.65e-05
		0.226		0.0151689	0.0299116	0.0278983	0.0340712	0.0346247	0.0330529	0.0349169	0.035581		0.00864742	0.00530022	0.00915876	0.00501249	0.01702	0.010184	0.0112871	0.0309179		0.000506297	-6.71e-08	-1.36e-07	2.49e-06	5.31e-06	-2.47e-08	-1.85e-07	-9.97e-05
		0.2265		0.0152202	0.0300104	0.0280024	0.0342525	0.0347091	0.0331174	0.0350076	0.0357061		0.00873232	0.00536108	0.0092028	0.00505017	0.0171098	0.0102351	0.0113827	0.0309524		0.000531591	-6.97e-08	-1.39e-07	2.56e-06	5.22e-06	-2.64e-08	-1.88e-07	-0.000102911
		0.227		0.0152712	0.030109	0.0281062	0.0344362	0.0347939	0.0331815	0.0350991	0.0358299		0.00881668	0.00542349	0.00924705	0.0050885	0.0171981	0.0102851	0.0114777	0.0309863		0.000557498	-7.24e-08	-1.43e-07	2.64e-06	5.12e-06	-2.81e-08	-1.92e-07	-0.000106206
		0.2275		0.0153222	0.0302074	0.0282097	0.034622	0.034879	0.0332451	0.0351914	0.0359523		0.00890045	0.00548748	0.00929151	0.00512747	0.017285	0.0103339	0.011572	0.0310194		0.00058402	-7.52e-08	-1.46e-07	2.72e-06	5e-06	-2.98e-08	-1.95e-07	-0.000109543
		0.228		0.015373	0.0303057	0.0283129	0.03481	0.0349644	0.0333083	0.0352843	0.0360733		0.00898357	0.00555303	0.00933617	0.00516707	0.0173703	0.0103818	0.0116656	0.0310519		0.000611157	-7.8e-08	-1.5e-07	2.8e-06	4.88e-06	-3.16e-08	-1.98e-07	-0.000112921
		0.2285		0.0154237	0.0304039	0.0284157	0.0350001	0.0350501	0.0333711	0.0353778	0.0361929		0.00906599	0.00562017	0.00938102	0.0052073	0.0174542	0.0104285	0.0117587	0.0310837		0.00063891	-8.08e-08	-1.53e-07	2.88e-06	4.75e-06	-3.34e-08	-2.01e-07	-0.000116339
		0.229		0.0154743	0.0305018	0.0285181	0.0351921	0.0351362	0.0334334	0.0354719	0.036311		0.00914766	0.00568889	0.00942607	0.00524813	0.0175366	0.0104741	0.0118512	0.0311149		0.000667279	-8.37e-08	-1.57e-07	2.95e-06	4.6e-06	-3.53e-08	-2.05e-07	-0.000119794
		0.2295		0.0155248	0.0305996	0.0286201	0.0353861	0.0352225	0.0334952	0.0355666	0.0364275		0.00922854	0.00575918	0.00947129	0.00528956	0.0176175	0.0105186	0.0119431	0.0311454		0.000696263	-8.66e-08	-1.61e-07	3.03e-06	4.45e-06	-3.73e-08	-2.08e-07	-0.000123286
		0.23		0.0155754	0.0306971	0.0287217	0.035582	0.035309	0.0335565	0.0356617	0.0365424		0.00930858	0.00583106	0.00951668	0.00533157	0.0176969	0.0105621	0.0120346	0.0311754		0.000725861	-8.96e-08	-1.64e-07	3.12e-06	4.28e-06	-3.92e-08	-2.11e-07	-0.000126811
		0.2305		0.0156259	0.0307945	0.0288228	0.0357796	0.0353958	0.0336173	0.0357572	0.0366557		0.00938773	0.00590451	0.00956223	0.00537415	0.0177747	0.0106045	0.0121256	0.0312049		0.000756072	-9.27e-08	-1.68e-07	3.2e-06	4.11e-06	-4.13e-08	-2.14e-07	-0.000130369
		0.231		0.0156764	0.0308917	0.0289233	0.0359788	0.0354829	0.0336776	0.0358532	0.0367673		0.00946597	0.00597954	0.00960791	0.00541727	0.0178511	0.0106459	0.0122161	0.0312338		0.000786892	-9.57e-08	-1.71e-07	3.28e-06	3.92e-06	-4.34e-08	-2.16e-07	-0.000133957
		0.2315		0.0157269	0.0309887	0.0290233	0.0361797	0.0355701	0.0337374	0.0359494	0.0368772		0.00954326	0.00605614	0.00965373	0.00546093	0.017926	0.0106862	0.0123062	0.0312621		0.000818317	-9.89e-08	-1.75e-07	3.36e-06	3.71e-06	-4.55e-08	-2.19e-07	-0.000137573
		0.232		0.0157776	0.0310855	0.0291226	0.0363821	0.0356575	0.0337967	0.0360459	0.0369853		0.00961956	0.0061343	0.00969964	0.00550509	0.0179994	0.0107255	0.012396	0.03129		0.000850345	-1.02e-07	-1.78e-07	3.44e-06	3.5e-06	-4.77e-08	-2.22e-07	-0.000141214
		0.2325		0.0158283	0.0311821	0.0292214	0.036586	0.0357452	0.0338555	0.0361426	0.0370917		0.00969484	0.006214	0.00974565	0.00554974	0.0180713	0.0107637	0.0124855	0.0313174		0.000882969	-1.05e-07	-1.82e-07	3.53e-06	3.27e-06	-4.99e-08	-2.24e-07	-0.000144878
		0.233		0.0158791	0.0312786	0.0293195	0.0367913	0.035833	0.0339138	0.0362395	0.0371962		0.00976908	0.00629525	0.00979173	0.00559485	0.0181417	0.0108009	0.0125746	0.0313444		0.000916184	-1.08e-07	-1.85e-07	3.61e-06	3.02e-06	-5.22e-08	-2.27e-07	-0.000148563
		0.2335		0.01593	0.0313748	0.029417	0.0369978	0.035921	0.0339716	0.0363366	0.0372989		0.00984224	0.00637801	0.00983786	0.00564041	0.0182107	0.0108372	0.0126635	0.0313709		0.000949984	-1.12e-07	-1.89e-07	3.69e-06	2.77e-06	-5.46e-08	-2.29e-07	-0.000152264
		0.234		0.0159811	0.0314709	0.0295138	0.0372057	0.0360091	0.0340289	0.0364336	0.0373998		0.00991431	0.00646229	0.00988401	0.00568637	0.0182782	0.0108725	0.0127521	0.031397		0.00098436	-1.15e-07	-1.92e-07	3.77e-06	2.5e-06	-5.7e-08	-2.31e-07	-0.000155981
		0.2345		0.0160324	0.0315668	0.0296098	0.0374148	0.0360974	0.0340857	0.0365307	0.0374988		0.00998526	0.00654805	0.00993016	0.00573273	0.0183443	0.0109068	0.0128405	0.0314228		0.0010193	-1.18e-07	-1.96e-07	3.86e-06	2.21e-06	-5.94e-08	-2.33e-07	-0.000159708
		0.235		0.0160839	0.0316625	0.0297052	0.037625	0.0361858	0.034142	0.0366277	0.0375959		0.0100551	0.00663528	0.00997627	0.00577944	0.0184089	0.0109402	0.0129287	0.0314482		0.00105481	-1.22e-07	-1.99e-07	3.94e-06	1.91e-06	-6.19e-08	-2.35e-07	-0.000163444
		0.2355		0.0161357	0.031758	0.0297998	0.0378363	0.0362743	0.0341979	0.0367247	0.0376911		0.0101237	0.00672395	0.0100223	0.00582648	0.0184722	0.0109726	0.0130168	0.0314734		0.00109086	-1.25e-07	-2.03e-07	4.02e-06	1.59e-06	-6.45e-08	-2.37e-07	-0.000167185
		0.236		0.0161877	0.0318534	0.0298937	0.0380487	0.036363	0.0342533	0.0368215	0.0377845		0.0101912	0.00681404	0.0100683	0.00587381	0.0185341	0.0110042	0.0131047	0.0314982		0.00112745	-1.29e-07	-2.06e-07	4.1e-06	1.26e-06	-6.71e-08	-2.39e-07	-0.000170927
		0.2365		0.01624	0.0319487	0.0299869	0.0382621	0.0364517	0.0343083	0.036918	0.0378759		0.0102575	0.00690552	0.0101142	0.0059214	0.0185946	0.0110349	0.0131926	0.0315228		0.00116456	-1.32e-07	-2.09e-07	4.19e-06	9.07e-07	-6.97e-08	-2.4e-07	-0.000174666
		0.237		0.0162926	0.0320437	0.0300793	0.0384764	0.0365405	0.0343628	0.0370144	0.0379653		0.0103226	0.00699835	0.0101598	0.00596922	0.0186539	0.0110647	0.0132804	0.0315472		0.00120218	-1.36e-07	-2.12e-07	4.27e-06	5.41e-07	-7.24e-08	-2.41e-07	-0.000178399
		0.2375		0.0163456	0.0321387	0.0301709	0.0386916	0.0366294	0.034417	0.0371104	0.0380529		0.0103865	0.0070925	0.0102053	0.00601723	0.0187118	0.0110938	0.0133681	0.0315714		0.0012403	-1.39e-07	-2.15e-07	4.35e-06	1.57e-07	-7.52e-08	-2.42e-07	-0.000182121
		0.238		0.0163989	0.0322335	0.0302618	0.0389077	0.0367184	0.0344707	0.0372061	0.0381385		0.0104492	0.00718795	0.0102506	0.0060654	0.0187684	0.011122	0.0134558	0.0315954		0.0012789	-1.43e-07	-2.18e-07	4.43e-06	-2.44e-07	-7.8e-08	-2.43e-07	-0.000185829
		0.2385		0.0164526	0.0323282	0.030352	0.0391247	0.0368075	0.0345242	0.0373014	0.0382223		0.0105106	0.00728465	0.0102956	0.00611369	0.0188238	0.0111494	0.0135436	0.0316193		0.00131796	-1.46e-07	-2.21e-07	4.51e-06	-6.63e-07	-8.08e-08	-2.44e-07	-0.000189517
		0.239		0.0165067	0.0324228	0.0304414	0.0393424	0.0368966	0.0345773	0.0373963	0.038304		0.0105708	0.00738258	0.0103403	0.00616208	0.0188779	0.0111761	0.0136313	0.0316431		0.00135747	-1.5e-07	-2.24e-07	4.59e-06	-1.1e-06	-8.37e-08	-2.44e-07	-0.000193182
		0.2395		0.0165613	0.0325172	0.03053	0.0395608	0.0369859	0.03463	0.0374907	0.0383839		0.0106298	0.00748171	0.0103847	0.00621055	0.0189309	0.0112021	0.0137191	0.0316668		0.0013974	-1.53e-07	-2.27e-07	4.66e-06	-1.56e-06	-8.66e-08	-2.45e-07	-0.000196818
		0.24		0.0166163	0.0326116	0.0306179	0.03978	0.0370753	0.0346826	0.0375847	0.0384618		0.0106876	0.007582	0.0104288	0.00625907	0.0189827	0.0112274	0.0138069	0.0316905		0.00143774	-1.57e-07	-2.29e-07	4.74e-06	-2.03e-06	-8.96e-08	-2.45e-07	-0.000200421
		0.2405		0.0166718	0.0327058	0.0307051	0.0399998	0.0371648	0.0347348	0.0376782	0.0385379		0.0107441	0.00768342	0.0104724	0.00630761	0.0190333	0.011252	0.0138949	0.0317142		0.00147845	-1.61e-07	-2.32e-07	4.81e-06	-2.53e-06	-9.27e-08	-2.44e-07	-0.000203986
		0.241		0.0167278	0.0328	0.0307916	0.0402203	0.0372544	0.0347869	0.0377711	0.038612		0.0107993	0.00778594	0.0105157	0.00635615	0.0190829	0.011276	0.0139829	0.0317379		0.00151953	-1.64e-07	-2.34e-07	4.89e-06	-3.04e-06	-9.57e-08	-2.44e-07	-0.000207506
		0.2415		0.0167843	0.032894	0.0308773	0.0404413	0.0373442	0.0348387	0.0378635	0.0386843		0.0108533	0.00788955	0.0105585	0.00640468	0.0191314	0.0112994	0.014071	0.0317617		0.00156093	-1.68e-07	-2.37e-07	4.96e-06	-3.58e-06	-9.89e-08	-2.43e-07	-0.000210977
		0.242		0.0168414	0.0329879	0.0309623	0.0406629	0.0374341	0.0348904	0.0379552	0.0387546		0.0109061	0.00799419	0.0106009	0.00645318	0.0191788	0.0113222	0.0141592	0.0317856		0.00160264	-1.71e-07	-2.39e-07	5.03e-06	-4.13e-06	-1.02e-07	-2.42e-07	-0.000214392
		0.2425		0.016899	0.0330818	0.0310466	0.040885	0.0375243	0.0349419	0.0380464	0.0388231		0.0109576	0.00809986	0.0106428	0.00650162	0.0192253	0.0113444	0.0142476	0.0318096		0.00164463	-1.75e-07	-2.41e-07	5.1e-06	-4.71e-06	-1.05e-07	-2.41e-07	-0.000217747
		0.243		0.0169572	0.0331755	0.0311303	0.0411076	0.0376147	0.0349934	0.038137	0.0388897		0.0110079	0.00820651	0.0106842	0.00655	0.0192708	0.0113662	0.014336	0.0318338		0.00168687	-1.78e-07	-2.43e-07	5.16e-06	-5.31e-06	-1.08e-07	-2.39e-07	-0.000221034
		0.2435		0.0170161	0.0332692	0.0312132	0.0413306	0.0377054	0.0350448	0.0382269	0.0389545		0.011057	0.00831412	0.0107251	0.0065983	0.0193154	0.0113875	0.0144247	0.0318582		0.00172932	-1.82e-07	-2.44e-07	5.23e-06	-5.93e-06	-1.12e-07	-2.37e-07	-0.000224247
		0.244		0.0170755	0.0333628	0.0312955	0.041554	0.0377963	0.0350962	0.0383161	0.0390175		0.0111049	0.00842266	0.0107654	0.00664651	0.0193591	0.0114084	0.0145134	0.0318828		0.00177196	-1.85e-07	-2.46e-07	5.29e-06	-6.57e-06	-1.15e-07	-2.35e-07	-0.00022738
		0.2445		0.0171356	0.0334562	0.0313772	0.0417777	0.0378876	0.0351476	0.0384047	0.0390787		0.0111515	0.0085321	0.0108052	0.00669462	0.019402	0.0114288	0.0146023	0.0319077		0.00181474	-1.89e-07	-2.47e-07	5.35e-06	-7.24e-06	-1.18e-07	-2.32e-07	-0.000230426
		0.245		0.0171963	0.0335496	0.0314583	0.0420017	0.0379792	0.0351991	0.0384926	0.039138		0.011197	0.00864241	0.0108445	0.00674262	0.019444	0.0114489	0.0146913	0.0319329		0.00185764	-1.92e-07	-2.48e-07	5.4e-06	-7.93e-06	-1.22e-07	-2.29e-07	-0.000233377
		0.2455		0.0172577	0.0336429	0.0315387	0.042226	0.0380713	0.0352506	0.0385799	0.0391956		0.0112412	0.00875356	0.0108832	0.00679049	0.0194853	0.0114686	0.0147804	0.0319585		0.00190061	-1.96e-07	-2.49e-07	5.46e-06	-8.64e-06	-1.25e-07	-2.26e-07	-0.000236227
		0.246		0.0173198	0.033736	0.0316185	0.0424504	0.0381638	0.0353023	0.0386664	0.0392514		0.0112842	0.00886551	0.0109213	0.00683824	0.0195258	0.0114881	0.0148697	0.0319844		0.00194362	-1.99e-07	-2.5e-07	5.51e-06	-9.37e-06	-1.29e-07	-2.22e-07	-0.000238969
		0.2465		0.0173825	0.0338291	0.0316978	0.0426751	0.0382567	0.0353541	0.0387522	0.0393055		0.0113261	0.00897825	0.0109588	0.00688586	0.0195657	0.0115073	0.0149591	0.0320107		0.00198662	-2.03e-07	-2.5e-07	5.55e-06	-1.01e-05	-1.32e-07	-2.18e-07	-0.000241593
		0.247		0.017446	0.033922	0.0317765	0.0428998	0.0383502	0.0354062	0.0388374	0.0393579		0.0113668	0.00909172	0.0109957	0.00693334	0.0196049	0.0115262	0.0150485	0.0320375		0.00202959	-2.06e-07	-2.51e-07	5.6e-06	-1.09e-05	-1.36e-07	-2.13e-07	-0.000244093
		0.2475		0.0175102	0.0340147	0.0318547	0.0431246	0.0384443	0.0354585	0.0389218	0.0394086		0.0114064	0.00920591	0.0110319	0.00698068	0.0196436	0.011545	0.0151381	0.0320647		0.00207248	-2.09e-07	-2.51e-07	5.63e-06	-1.17e-05	-1.39e-07	-2.08e-07	-0.00024646
		0.248		0.017575	0.0341074	0.0319323	0.0433493	0.038539	0.0355111	0.0390055	0.0394577		0.0114448	0.00932077	0.0110676	0.00702787	0.0196816	0.0115636	0.0152277	0.0320924		0.00211527	-2.12e-07	-2.5e-07	5.67e-06	-1.26e-05	-1.43e-07	-2.03e-07	-0.000248686
		0.2485		0.0176407	0.0341999	0.0320095	0.043574	0.0386344	0.035564	0.0390885	0.039505		0.011482	0.00943627	0.0111026	0.00707492	0.0197191	0.0115822	0.0153173	0.0321207		0.00215793	-2.15e-07	-2.5e-07	5.7e-06	-1.34e-05	-1.46e-07	-1.97e-07	-0.000250762
		0.249		0.017707	0.0342922	0.0320862	0.0437985	0.0387305	0.0356174	0.0391708	0.0395508		0.0115182	0.00955237	0.011137	0.00712182	0.0197562	0.0116006	0.015407	0.0321496		0.00220042	-2.18e-07	-2.49e-07	5.73e-06	-1.43e-05	-1.5e-07	-1.91e-07	-0.000252679
		0.2495		0.017774	0.0343845	0.0321624	0.0440228	0.0388273	0.0356711	0.0392523	0.0395949		0.0115532	0.00966903	0.0111707	0.00716858	0.0197928	0.011619	0.0154966	0.0321791		0.00224273	-2.21e-07	-2.48e-07	5.75e-06	-1.52e-05	-1.53e-07	-1.84e-07	-0.000254428
		0.25		0.0178418	0.0344766	0.0322381	0.0442468	0.038925	0.0357253	0.0393331	0.0396375		0.0115872	0.00978622	0.0112038	0.0072152	0.0198291	0.0116375	0.0155862	0.0322093		0.00228482	-2.24e-07	-2.47e-07	5.77e-06	-1.61e-05	-1.57e-07	-1.77e-07	-0.000256
		0.2505		0.0179104	0.0345686	0.0323134	0.0444705	0.0390236	0.0357801	0.0394133	0.0396785		0.0116201	0.00990389	0.0112362	0.00726167	0.0198649	0.0116559	0.0156757	0.0322401		0.00232667	-2.27e-07	-2.45e-07	5.78e-06	-1.71e-05	-1.61e-07	-1.69e-07	-0.000257385
		0.251		0.0179796	0.0346605	0.0323883	0.0446938	0.0391231	0.0358354	0.0394927	0.039718		0.0116519	0.010022	0.011268	0.007308	0.0199005	0.0116745	0.0157651	0.0322717		0.00236826	-2.29e-07	-2.43e-07	5.79e-06	-1.81e-05	-1.64e-07	-1.61e-07	-0.000258573
		0.2515		0.0180496	0.0347523	0.0324628	0.0449165	0.0392236	0.0358912	0.0395714	0.039756		0.0116827	0.0101405	0.0112991	0.0073542	0.0199358	0.0116932	0.0158543	0.032304		0.00240958	-2.32e-07	-2.41e-07	5.79e-06	-1.91e-05	-1.68e-07	-1.52e-07	-0.000259555
		0.252		0.0181203	0.0348441	0.032537	0.0451387	0.0393251	0.0359478	0.0396494	0.0397925		0.0117124	0.0102593	0.0113296	0.00740026	0.019971	0.0117121	0.0159433	0.0323371		0.0024506	-2.34e-07	-2.38e-07	5.79e-06	-2.01e-05	-1.71e-07	-1.42e-07	-0.000260318
		0.2525		0.0181917	0.0349357	0.0326107	0.0453603	0.0394278	0.036005	0.0397267	0.0398276		0.0117412	0.0103785	0.0113593	0.0074462	0.0200059	0.0117312	0.016032	0.032371		0.0024913	-2.37e-07	-2.35e-07	5.78e-06	-2.12e-05	-1.75e-07	-1.32e-07	-0.000260854
		0.253		0.0182638	0.0350273	0.0326842	0.0455811	0.0395316	0.0360629	0.0398032	0.0398612		0.0117689	0.0104979	0.0113885	0.00749202	0.0200407	0.0117505	0.0161205	0.0324057		0.00253168	-2.39e-07	-2.32e-07	5.76e-06	-2.23e-05	-1.78e-07	-1.22e-07	-0.000261151
		0.2535		0.0183366	0.0351188	0.0327573	0.0458011	0.0396366	0.0361217	0.0398791	0.0398935		0.0117957	0.0106174	0.0114169	0.00753772	0.0200754	0.0117702	0.0162086	0.0324414		0.00257172	-2.41e-07	-2.28e-07	5.74e-06	-2.34e-05	-1.82e-07	-1.11e-07	-0.000261197
		0.254		0.01841	0.0352103	0.03283	0.0460202	0.0397429	0.0361812	0.0399543	0.0399243		0.0118215	0.0107371	0.0114447	0.00758331	0.0201101	0.0117901	0.0162962	0.0324779		0.0026114	-2.43e-07	-2.24e-07	5.71e-06	-2.46e-05	-1.85e-07	-9.87e-08	-0.000260983
		0.2545		0.0184841	0.0353018	0.0329025	0.0462384	0.0398505	0.0362417	0.0400288	0.0399539		0.0118463	0.0108569	0.0114719	0.00762879	0.0201447	0.0118105	0.0163834	0.0325155		0.00265071	-2.44e-07	-2.19e-07	5.68e-06	-2.58e-05	-1.89e-07	-8.63e-08	-0.000260495
		0.255		0.0185589	0.0353933	0.0329747	0.0464555	0.0399596	0.036303	0.0401027	0.0399821		0.0118702	0.0109767	0.0114983	0.00767418	0.0201794	0.0118313	0.0164701	0.0325539		0.00268965	-2.46e-07	-2.14e-07	5.63e-06	-2.7e-05	-1.92e-07	-7.32e-08	-0.000259722
		0.2555		0.0186343	0.0354848	0.0330466	0.0466716	0.0400701	0.0363653	0.0401758	0.040009		0.0118932	0.0110965	0.0115242	0.00771948	0.0202143	0.0118526	0.0165563	0.0325934		0.00272821	-2.47e-07	-2.09e-07	5.58e-06	-2.82e-05	-1.96e-07	-5.94e-08	-0.000258651
		0.256		0.0187102	0.0355763	0.0331183	0.0468864	0.0401821	0.0364286	0.0402483	0.0400346		0.0119154	0.0112161	0.0115493	0.00776471	0.0202492	0.0118743	0.0166418	0.032634		0.00276638	-2.48e-07	-2.03e-07	5.52e-06	-2.95e-05	-1.99e-07	-4.5e-08	-0.000257271
		0.2565		0.0187868	0.0356679	0.0331897	0.0470999	0.0402957	0.036493	0.0403201	0.040059		0.0119366	0.0113356	0.0115739	0.00780986	0.0202843	0.0118967	0.0167266	0.0326756		0.00280415	-2.49e-07	-1.96e-07	5.45e-06	-3.07e-05	-2.03e-07	-2.98e-08	-0.000255569
		0.257		0.0188638	0.0357596	0.0332609	0.047312	0.040411	0.0365584	0.0403912	0.0400822		0.011957	0.0114548	0.0115977	0.00785494	0.0203196	0.0119196	0.0168108	0.0327183		0.00284152	-2.5e-07	-1.9e-07	5.38e-06	-3.21e-05	-2.06e-07	-1.39e-08	-0.000253531
		0.2575		0.0189415	0.0358513	0.0333318	0.0475227	0.0405279	0.036625	0.0404617	0.0401042		0.0119765	0.0115738	0.011621	0.00789998	0.0203552	0.0119431	0.0168942	0.0327621		0.00287849	-2.5e-07	-1.82e-07	5.29e-06	-3.34e-05	-2.09e-07	2.68e-09	-0.000251145
		0.258		0.0190196	0.0359432	0.0334025	0.0477318	0.0406466	0.0366928	0.0405315	0.040125		0.0119952	0.0116925	0.0116436	0.00794496	0.0203911	0.0119674	0.0169767	0.0328071		0.00291505	-2.51e-07	-1.74e-07	5.2e-06	-3.48e-05	-2.12e-07	2e-08	-0.000248397
		0.2585		0.0190982	0.0360352	0.033473	0.0479392	0.0407672	0.0367617	0.0406007	0.0401447		0.0120131	0.0118107	0.0116655	0.00798991	0.0204273	0.0119924	0.0170584	0.0328533		0.00295121	-2.51e-07	-1.66e-07	5.09e-06	-3.62e-05	-2.15e-07	3.82e-08	-0.000245273
		0.259		0.0191773	0.0361273	0.0335432	0.0481449	0.0408896	0.0368319	0.0406692	0.0401633		0.0120303	0.0119286	0.0116869	0.00803483	0.020464	0.0120181	0.0171392	0.0329006		0.00298696	-2.5e-07	-1.57e-07	4.98e-06	-3.76e-05	-2.18e-07	5.71e-08	-0.00024176
		0.2595		0.0192568	0.0362196	0.0336133	0.0483488	0.0410139	0.0369035	0.040737	0.0401808		0.0120466	0.0120459	0.0117076	0.00807972	0.020501	0.0120447	0.017219	0.0329492		0.0030223	-2.5e-07	-1.47e-07	4.86e-06	-3.9e-05	-2.21e-07	7.68e-08	-0.000237844
		0.26		0.0193368	0.0363122	0.0336831	0.0485508	0.0411402	0.0369763	0.0408042	0.0401972		0.0120622	0.0121628	0.0117277	0.00812461	0.0205385	0.0120721	0.0172979	0.0329991		0.00305725	-2.49e-07	-1.37e-07	4.72e-06	-4.05e-05	-2.24e-07	9.73e-08	-0.000233509
		0.2605		0.0194172	0.0364049	0.0337528	0.0487509	0.0412686	0.0370505	0.0408708	0.0402127		0.0120771	0.012279	0.0117472	0.0081695	0.0205765	0.0121005	0.0173757	0.0330502		0.00309179	-2.48e-07	-1.26e-07	4.58e-06	-4.2e-05	-2.27e-07	1.19e-07	-0.000228742
		0.261		0.0194981	0.0364978	0.0338222	0.0489489	0.041399	0.0371262	0.0409367	0.0402271		0.0120912	0.0123947	0.011766	0.00821439	0.0206151	0.0121297	0.0174525	0.0331027		0.00312593	-2.47e-07	-1.15e-07	4.42e-06	-4.35e-05	-2.29e-07	1.41e-07	-0.000223527
		0.2615		0.0195793	0.036591	0.0338914	0.0491448	0.0415317	0.0372033	0.0410019	0.0402405		0.0121047	0.0125098	0.0117843	0.00825929	0.0206542	0.01216	0.0175281	0.0331564		0.00315968	-2.45e-07	-1.03e-07	4.25e-06	-4.51e-05	-2.32e-07	1.64e-07	-0.00021785
		0.262		0.0196609	0.0366845	0.0339603	0.0493385	0.0416665	0.0372819	0.0410665	0.0402529		0.0121174	0.0126242	0.011802	0.00830422	0.020694	0.0121913	0.0176027	0.0332115		0.00319304	-2.43e-07	-9.04e-08	4.07e-06	-4.67e-05	-2.34e-07	1.88e-07	-0.000211695
		0.2625		0.0197429	0.0367782	0.0340291	0.0495301	0.0418035	0.0373619	0.0411304	0.0402645		0.0121295	0.012738	0.0118192	0.00834918	0.0207344	0.0122237	0.0176761	0.033268		0.00322603	-2.41e-07	-7.71e-08	3.88e-06	-4.83e-05	-2.37e-07	2.13e-07	-0.000205047
		0.263		0.0198253	0.0368723	0.0340976	0.0497193	0.0419429	0.0374436	0.0411937	0.0402751		0.012141	0.0128511	0.0118357	0.00839418	0.0207756	0.0122572	0.0177484	0.0333259		0.00325864	-2.38e-07	-6.31e-08	3.68e-06	-4.99e-05	-2.39e-07	2.39e-07	-0.00019789
		0.2635		0.019908	0.0369667	0.0341658	0.0499061	0.0420846	0.0375268	0.0412563	0.0402848		0.0121518	0.0129635	0.0118517	0.00843923	0.0208174	0.0122919	0.0178194	0.0333851		0.00329089	-2.35e-07	-4.84e-08	3.46e-06	-5.16e-05	-2.41e-07	2.65e-07	-0.000190207
		0.264		0.0199911	0.0370614	0.0342338	0.0500906	0.0422288	0.0376117	0.0413182	0.0402937		0.012162	0.0130752	0.0118671	0.00848433	0.0208601	0.0123277	0.0178893	0.0334458		0.00332278	-2.32e-07	-3.3e-08	3.23e-06	-5.32e-05	-2.43e-07	2.93e-07	-0.000181984
		0.2645		0.0200744	0.0371564	0.0343015	0.0502726	0.0423753	0.0376981	0.0413794	0.0403018		0.0121717	0.0131861	0.011882	0.00852948	0.0209035	0.0123648	0.0179579	0.0335079		0.00335432	-2.28e-07	-1.69e-08	2.98e-06	-5.49e-05	-2.44e-07	3.22e-07	-0.000173204
		0.265		0.0201581	0.0372518	0.034369	0.0504521	0.0425243	0.0377863	0.04144	0.040309		0.0121807	0.0132964	0.0118963	0.00857471	0.0209478	0.0124032	0.0180253	0.0335714		0.00338552	-2.24e-07	1.37e-11	2.72e-06	-5.66e-05	-2.46e-07	3.51e-07	-0.00016385
		0.2655		0.0202421	0.0373476	0.0344361	0.0506291	0.0426759	0.0378762	0.0414998	0.0403154		0.0121892	0.0134059	0.0119101	0.00862001	0.020993	0.012443	0.0180915	0.0336364		0.0034164	-2.19e-07	1.77e-08	2.45e-06	-5.84e-05	-2.47e-07	3.82e-07	-0.000153905
		0.266		0.0203264	0.0374437	0.0345029	0.0508034	0.04283	0.0379677	0.0415589	0.0403211		0.0121971	0.0135147	0.0119233	0.00866538	0.021039	0.0124841	0.0181564	0.0337028		0.00344697	-2.14e-07	3.61e-08	2.16e-06	-6.01e-05	-2.48e-07	4.13e-07	-0.000143354
		0.2665		0.020411	0.0375403	0.0345694	0.0509751	0.0429867	0.038061	0.0416173	0.040326		0.0122045	0.0136227	0.0119361	0.00871083	0.021086	0.0125266	0.01822	0.0337707		0.00347723	-2.09e-07	5.54e-08	1.86e-06	-6.19e-05	-2.49e-07	4.46e-07	-0.000132178
		0.267		0.0204958	0.0376372	0.0346356	0.0511441	0.043146	0.0381561	0.041675	0.0403302		0.0122114	0.01373	0.0119483	0.00875637	0.021134	0.0125706	0.0182823	0.0338401		0.0035072	-2.03e-07	7.54e-08	1.54e-06	-6.37e-05	-2.5e-07	4.8e-07	-0.000120362
		0.2675		0.0205809	0.0377346	0.0347014	0.0513103	0.0433079	0.0382529	0.0417319	0.0403337		0.0122178	0.0138366	0.01196	0.00880199	0.021183	0.012616	0.0183434	0.033911		0.0035369	-1.96e-07	9.63e-08	1.2e-06	-6.55e-05	-2.5e-07	5.14e-07	-0.000107886
		0.268		0.0206663	0.0378324	0.0347669	0.0514738	0.0434725	0.0383516	0.041788	0.0403366		0.0122237	0.0139425	0.0119713	0.00884771	0.0212329	0.012663	0.0184032	0.0339833		0.00356632	-1.9e-07	1.18e-07	8.48e-07	-6.74e-05	-2.51e-07	5.5e-07	-9.47e-05
		0.2685		0.0207518	0.0379306	0.0348321	0.0516344	0.0436398	0.038452	0.0418434	0.0403387		0.0122291	0.0140477	0.011982	0.00889352	0.021284	0.0127116	0.0184617	0.0340572		0.0035955	-1.82e-07	1.41e-07	4.79e-07	-6.92e-05	-2.51e-07	5.87e-07	-8.09e-05
		0.269		0.0208376	0.0380292	0.0348969	0.0517922	0.0438098	0.0385543	0.0418979	0.0403403		0.0122341	0.0141522	0.0119923	0.00893942	0.0213361	0.0127617	0.0185189	0.0341326		0.00362444	-1.74e-07	1.64e-07	9.28e-08	-7.11e-05	-2.5e-07	6.25e-07	-6.63e-05
		0.2695		0.0209236	0.0381282	0.0349613	0.0519471	0.0439825	0.0386584	0.0419516	0.0403412		0.0122386	0.014256	0.0120021	0.00898541	0.0213893	0.0128136	0.0185748	0.0342095		0.00365316	-1.66e-07	1.89e-07	-3.11e-07	-7.29e-05	-2.5e-07	6.64e-07	-5.11e-05
		0.27		0.0210097	0.0382276	0.0350255	0.0520991	0.044158	0.0387644	0.0420044	0.0403415		0.0122428	0.0143592	0.0120115	0.0090315	0.0214436	0.0128671	0.0186294	0.034288		0.00368167	-1.57e-07	2.14e-07	-7.33e-07	-7.48e-05	-2.49e-07	7.04e-07	-3.5e-05
		0.2705		0.021096	0.0383275	0.0350893	0.0522482	0.0443361	0.0388721	0.0420563	0.0403412		0.0122465	0.0144617	0.0120204	0.00907767	0.0214991	0.0129223	0.0186828	0.0343681		0.00370999	-1.47e-07	2.4e-07	-1.17e-06	-7.67e-05	-2.48e-07	7.45e-07	-1.82e-05
		0.271		0.0211825	0.0384278	0.0351527	0.0523942	0.0445171	0.0389817	0.0421074	0.0403404		0.0122498	0.0145636	0.0120288	0.00912393	0.0215558	0.0129792	0.0187349	0.0344498		0.00373814	-1.37e-07	2.67e-07	-1.63e-06	-7.86e-05	-2.47e-07	7.87e-07	-6.62e-07
		0.2715		0.0212691	0.0385284	0.0352158	0.0525374	0.0447007	0.0390932	0.0421576	0.0403391		0.0122527	0.0146649	0.0120369	0.00917027	0.0216136	0.013038	0.0187857	0.0345331		0.00376612	-1.26e-07	2.96e-07	-2.11e-06	-8.05e-05	-2.45e-07	8.31e-07	1.77e-05
		0.272		0.0213558	0.0386295	0.0352786	0.0526775	0.0448871	0.0392065	0.0422069	0.0403372		0.0122553	0.0147657	0.0120445	0.00921669	0.0216726	0.0130986	0.0188352	0.034618		0.00379396	-1.15e-07	3.25e-07	-2.61e-06	-8.24e-05	-2.43e-07	8.75e-07	3.69e-05
		0.2725		0.0214425	0.0387309	0.035341	0.0528147	0.0450763	0.0393216	0.0422553	0.0403348		0.0122575	0.0148658	0.0120516	0.00926317	0.0217329	0.013161	0.0188835	0.0347047		0.00382168	-1.03e-07	3.55e-07	-3.13e-06	-8.44e-05	-2.41e-07	9.21e-07	5.69e-05
		0.273		0.0215294	0.0388326	0.0354032	0.0529488	0.0452681	0.0394385	0.0423027	0.040332		0.0122594	0.0149655	0.0120584	0.00930973	0.0217944	0.0132253	0.0189306	0.034793		0.00384928	-9.04e-08	3.86e-07	-3.67e-06	-8.63e-05	-2.38e-07	9.68e-07	7.78e-05
		0.2735		0.0216163	0.0389347	0.035465	0.05308	0.0454626	0.0395573	0.0423493	0.0403287		0.012261	0.0150646	0.0120648	0.00935633	0.0218571	0.0132915	0.0189764	0.0348831		0.00387679	-7.71e-08	4.18e-07	-4.22e-06	-8.82e-05	-2.35e-07	1.02e-06	9.95e-05
		0.274		0.0217032	0.0390372	0.0355265	0.0532081	0.0456598	0.0396778	0.0423949	0.0403249		0.0122622	0.0151633	0.0120708	0.00940298	0.0219211	0.0133596	0.019021	0.0349749		0.00390421	-6.31e-08	4.51e-07	-4.8e-06	-9.01e-05	-2.32e-07	1.06e-06	0.000122176
		0.2745		0.0217902	0.0391399	0.0355877	0.0533333	0.0458596	0.0398001	0.0424396	0.0403207		0.0122632	0.0152615	0.0120764	0.00944967	0.0219863	0.0134298	0.0190644	0.0350685		0.00393158	-4.84e-08	4.86e-07	-5.41e-06	-9.2e-05	-2.28e-07	1.12e-06	0.000145714
		0.275		0.0218772	0.0392429	0.0356486	0.0534555	0.046062	0.0399241	0.0424834	0.0403161		0.0122638	0.0153593	0.0120816	0.00949637	0.0220528	0.0135019	0.0191066	0.035164		0.00395891	-3.3e-08	5.21e-07	-6.03e-06	-9.39e-05	-2.24e-07	1.17e-06	0.000170174
		0.2755		0.0219641	0.0393461	0.0357092	0.0535747	0.046267	0.0400499	0.0425262	0.0403111		0.0122642	0.0154567	0.0120865	0.00954308	0.0221206	0.013576	0.0191476	0.0352613		0.00398621	-1.69e-08	5.58e-07	-6.68e-06	-9.58e-05	-2.19e-07	1.22e-06	0.000195574
		0.276		0.0220511	0.0394495	0.0357696	0.053691	0.0464745	0.0401773	0.0425681	0.0403057		0.0122643	0.0155537	0.012091	0.00958978	0.0221897	0.0136522	0.0191875	0.0353605		0.0040135	1.37e-11	5.95e-07	-7.34e-06	-9.77e-05	-2.14e-07	1.27e-06	0.00022193
		0.2765		0.0221381	0.0395531	0.0358296	0.0538043	0.0466844	0.0403064	0.0426092	0.0402999		0.0122641	0.0156504	0.0120951	0.00963646	0.0222601	0.0137304	0.0192262	0.0354616		0.00404081	1.77e-08	6.34e-07	-8.04e-06	-9.96e-05	-2.09e-07	1.33e-06	0.000249259
		0.277		0.0222251	0.0396568	0.0358894	0.0539147	0.0468967	0.040437	0.0426493	0.0402939		0.0122638	0.0157468	0.0120989	0.00968309	0.0223317	0.0138107	0.0192638	0.0355647		0.00406813	3.61e-08	6.73e-07	-8.75e-06	-0.000101472	-2.03e-07	1.38e-06	0.000277579
		0.2775		0.0223121	0.0397605	0.035949	0.0540221	0.0471114	0.0405693	0.0426885	0.0402874		0.0122631	0.015843	0.0121024	0.00972965	0.0224046	0.0138931	0.0193003	0.0356698		0.0040955	5.54e-08	7.14e-07	-9.49e-06	-0.000103316	-1.96e-07	1.44e-06	0.000306905
		0.278		0.0223991	0.0398644	0.0360083	0.0541267	0.0473283	0.040703	0.0427268	0.0402807		0.0122623	0.0159389	0.0121056	0.00977613	0.0224788	0.0139777	0.0193357	0.0357769		0.00412293	7.54e-08	7.56e-07	-1.03e-05	-0.000105141	-1.9e-07	1.5e-06	0.000337253
		0.2785		0.022486	0.0399682	0.0360674	0.0542284	0.0475475	0.0408383	0.0427643	0.0402736		0.0122613	0.0160346	0.0121084	0.0098225	0.0225542	0.0140643	0.01937	0.0358861		0.00415044	9.63e-08	7.99e-07	-1.1e-05	-0.000106942	-1.82e-07	1.56e-06	0.00036864
		0.279		0.022573	0.0400719	0.0361262	0.0543272	0.0477687	0.0409749	0.0428009	0.0402663		0.01226	0.0161301	0.0121109	0.00986873	0.0226309	0.0141531	0.0194033	0.0359974		0.00417804	1.18e-07	8.44e-07	-1.18e-05	-0.000108717	-1.74e-07	1.62e-06	0.000401081
		0.2795		0.0226601	0.0401756	0.0361849	0.0544233	0.0479921	0.041113	0.0428366	0.0402587		0.0122586	0.0162254	0.0121131	0.0099148	0.0227089	0.0142441	0.0194356	0.0361108		0.00420576	1.41e-07	8.89e-07	-1.27e-05	-0.000110463	-1.66e-07	1.68e-06	0.000434591
		0.28		0.0227471	0.0402792	0.0362433	0.0545165	0.0482175	0.0412524	0.0428715	0.0402508		0.012257	0.0163207	0.0121151	0.00996068	0.022788	0.0143372	0.0194668	0.0362265		0.00423359	1.64e-07	9.36e-07	-1.35e-05	-0.000112176	-1.57e-07	1.74e-06	0.000469184
		0.2805		0.0228342	0.0403825	0.0363016	0.054607	0.0484448	0.041393	0.0429055	0.0402427		0.0122552	0.0164159	0.0121167	0.0100063	0.0228684	0.0144325	0.019497	0.0363443		0.00426158	1.89e-07	9.84e-07	-1.44e-05	-0.000113855	-1.47e-07	1.81e-06	0.000504875
		0.281		0.0229213	0.0404857	0.0363596	0.0546948	0.0486739	0.0415349	0.0429388	0.0402344		0.0122532	0.016511	0.012118	0.0100517	0.02295	0.01453	0.0195263	0.0364644		0.00428972	2.14e-07	1.03e-06	-1.53e-05	-0.000115494	-1.37e-07	1.87e-06	0.000541679
		0.2815		0.0230085	0.0405886	0.0364175	0.0547798	0.0489047	0.041678	0.0429713	0.0402258		0.0122511	0.0166062	0.0121191	0.0100969	0.0230328	0.0146297	0.0195547	0.0365868		0.00431804	2.4e-07	1.08e-06	-1.63e-05	-0.000117092	-1.26e-07	1.94e-06	0.000579607
		0.282		0.0230957	0.0406912	0.0364752	0.0548622	0.0491373	0.0418223	0.0430029	0.040217		0.0122489	0.0167013	0.0121199	0.0101417	0.0231168	0.0147315	0.0195821	0.0367116		0.00434655	2.67e-07	1.13e-06	-1.72e-05	-0.000118644	-1.15e-07	2.01e-06	0.000618674
		0.2825		0.0231831	0.0407935	0.0365327	0.054942	0.0493714	0.0419676	0.0430339	0.0402081		0.0122465	0.0167965	0.0121204	0.0101862	0.023202	0.0148355	0.0196087	0.0368387		0.00437527	2.96e-07	1.19e-06	-1.82e-05	-0.000120147	-1.03e-07	2.08e-06	0.000658891
		0.283		0.0232705	0.0408955	0.0365901	0.0550191	0.049607	0.0421139	0.0430641	0.0401989		0.012244	0.0168917	0.0121207	0.0102304	0.0232884	0.0149416	0.0196343	0.0369681		0.00440421	3.25e-07	1.24e-06	-1.93e-05	-0.000121596	-9.04e-08	2.15e-06	0.000700271
		0.2835		0.023358	0.0409971	0.0366473	0.0550938	0.0498441	0.0422612	0.0430935	0.0401896		0.0122413	0.016987	0.0121207	0.0102742	0.023376	0.01505	0.0196592	0.0371001		0.00443339	3.55e-07	1.3e-06	-2.03e-05	-0.000122989	-7.71e-08	2.22e-06	0.000742823
		0.284		0.0234457	0.0410984	0.0367043	0.0551658	0.0500824	0.0424094	0.0431223	0.0401801		0.0122386	0.0170825	0.0121205	0.0103176	0.0234647	0.0151604	0.0196832	0.0372344		0.00446282	3.86e-07	1.35e-06	-2.14e-05	-0.000124321	-6.31e-08	2.29e-06	0.000786559
		0.2845		0.0235335	0.0411992	0.0367613	0.0552355	0.050322	0.0425585	0.0431504	0.0401705		0.0122358	0.0171781	0.0121201	0.0103606	0.0235546	0.015273	0.0197064	0.0373713		0.00449251	4.18e-07	1.41e-06	-2.25e-05	-0.000125588	-4.84e-08	2.36e-06	0.000831488
		0.285		0.0236215	0.0412996	0.0368181	0.0553026	0.0505627	0.0427084	0.0431779	0.0401608		0.0122328	0.0172739	0.0121194	0.0104032	0.0236457	0.0153877	0.0197288	0.0375107		0.00452248	4.51e-07	1.47e-06	-2.36e-05	-0.000126786	-3.3e-08	2.43e-06	0.000877619
		0.2855		0.0237097	0.0413996	0.0368747	0.0553674	0.0508045	0.0428591	0.0432048	0.0401509		0.0122298	0.0173699	0.0121185	0.0104454	0.0237379	0.0155045	0.0197505	0.0376527		0.00455274	4.86e-07	1.53e-06	-2.48e-05	-0.000127911	-1.69e-08	2.51e-06	0.000924959
		0.286		0.0237981	0.0414992	0.0369313	0.0554298	0.0510472	0.0430105	0.043231	0.0401409		0.0122267	0.0174661	0.0121174	0.0104871	0.0238314	0.0156234	0.0197715	0.0377972		0.00458331	5.21e-07	1.59e-06	-2.59e-05	-0.000128957	1.37e-11	2.58e-06	0.000973517
		0.2865		0.0238867	0.0415983	0.0369877	0.0554899	0.0512908	0.0431626	0.0432567	0.0401309		0.0122235	0.0175626	0.012116	0.0105284	0.0239259	0.0157443	0.0197918	0.0379444		0.00461419	5.58e-07	1.65e-06	-2.71e-05	-0.000129921	1.77e-08	2.66e-06	0.0010233
		0.287		0.0239755	0.041697	0.037044	0.0555477	0.0515351	0.0433154	0.0432819	0.0401207		0.0122202	0.0176594	0.0121145	0.0105693	0.0240217	0.0158673	0.0198115	0.0380942		0.00464539	5.95e-07	1.71e-06	-2.84e-05	-0.000130797	3.61e-08	2.73e-06	0.00107431
		0.2875		0.0240646	0.0417953	0.0371001	0.0556033	0.05178	0.0434687	0.0433065	0.0401105		0.0122169	0.0177565	0.0121127	0.0106096	0.0241186	0.0159922	0.0198305	0.0382466		0.00467694	6.34e-07	1.78e-06	-2.96e-05	-0.000131581	5.54e-08	2.81e-06	0.00112655
		0.288		0.024154	0.0418931	0.0371562	0.0556566	0.0520255	0.0436227	0.0433307	0.0401002		0.0122135	0.017854	0.0121108	0.0106496	0.0242167	0.016119	0.0198489	0.0384017		0.00470883	6.73e-07	1.84e-06	-3.09e-05	-0.000132268	7.54e-08	2.89e-06	0.00118003
		0.2885		0.0242436	0.0419905	0.0372121	0.0557079	0.0522713	0.0437772	0.0433544	0.0400899		0.01221	0.0179518	0.0121087	0.010689	0.0243159	0.0162477	0.0198667	0.0385595		0.00474107	7.14e-07	1.91e-06	-3.22e-05	-0.000132853	9.63e-08	2.96e-06	0.00123475
		0.289		0.0243336	0.0420874	0.0372678	0.055757	0.0525175	0.0439323	0.0433776	0.0400795		0.0122066	0.0180501	0.0121063	0.010728	0.0244163	0.0163784	0.019884	0.03872		0.00477368	7.56e-07	1.98e-06	-3.36e-05	-0.00013333	1.18e-07	3.04e-06	0.00129071
		0.2895		0.0244239	0.0421839	0.0373235	0.0558041	0.0527638	0.0440879	0.0434005	0.0400691		0.012203	0.0181489	0.0121038	0.0107664	0.0245179	0.0165108	0.0199007	0.0388833		0.00480667	7.99e-07	2.05e-06	-3.5e-05	-0.000133694	1.41e-07	3.12e-06	0.00134791
		0.29		0.0245146	0.04228	0.037379	0.0558491	0.0530102	0.0442441	0.043423	0.0400586		0.0121995	0.0182482	0.0121012	0.0108045	0.0246206	0.016645	0.0199169	0.0390493		0.00484003	8.44e-07	2.12e-06	-3.64e-05	-0.00013394	1.64e-07	3.2e-06	0.00140634
		0.2905		0.0246056	0.0423757	0.0374343	0.0558922	0.0532566	0.0444007	0.0434452	0.0400482		0.0121959	0.0183481	0.0120983	0.010842	0.0247244	0.016781	0.0199327	0.039218		0.00487378	8.89e-07	2.19e-06	-3.78e-05	-0.000134062	1.89e-07	3.28e-06	0.00146601
		0.291		0.024697	0.042471	0.0374895	0.0559334	0.0535028	0.0445579	0.043467	0.0400377		0.0121922	0.0184486	0.0120953	0.0108791	0.0248295	0.0169186	0.019948	0.0393895		0.00490793	9.36e-07	2.26e-06	-3.92e-05	-0.000134054	2.14e-07	3.36e-06	0.00152691
		0.2915		0.0247889	0.0425659	0.0375446	0.0559726	0.0537488	0.0447156	0.0434886	0.0400273		0.0121886	0.0185498	0.0120921	0.0109157	0.0249356	0.0170579	0.019963	0.0395637		0.00494247	9.84e-07	2.33e-06	-4.07e-05	-0.000133911	2.4e-07	3.44e-06	0.00158904
		0.292		0.0248811	0.0426605	0.0375994	0.0560101	0.0539943	0.0448738	0.04351	0.0400169		0.0121849	0.0186517	0.0120888	0.0109518	0.0250429	0.0171989	0.0199775	0.0397406		0.00497741	1.03e-06	2.4e-06	-4.22e-05	-0.000133625	2.67e-07	3.52e-06	0.00165239
		0.2925		0.0249738	0.0427547	0.0376541	0.0560457	0.0542394	0.0450325	0.0435312	0.0400065		0.0121813	0.0187544	0.0120853	0.0109875	0.0251513	0.0173414	0.0199917	0.0399203		0.00501275	1.08e-06	2.48e-06	-4.38e-05	-0.000133192	2.96e-07	3.61e-06	0.00171695
		0.293		0.0250669	0.0428485	0.0377086	0.0560796	0.0544838	0.0451918	0.0435522	0.0399962		0.0121776	0.0188579	0.0120817	0.0110227	0.0252609	0.0174855	0.0200055	0.0401028		0.0050485	1.13e-06	2.55e-06	-4.53e-05	-0.000132605	3.25e-07	3.69e-06	0.0017827
		0.2935		0.0251605	0.0429421	0.0377629	0.0561118	0.0547276	0.0453517	0.043573	0.0399859		0.0121739	0.0189623	0.0120779	0.0110575	0.0253716	0.017631	0.020019	0.0402879		0.00508466	1.19e-06	2.63e-06	-4.69e-05	-0.000131857	3.55e-07	3.77e-06	0.00184965
		0.294		0.0252545	0.0430353	0.0378169	0.0561423	0.0549705	0.0455121	0.0435938	0.0399757		0.0121702	0.0190676	0.012074	0.0110918	0.0254834	0.017778	0.0200323	0.0404758		0.00512122	1.24e-06	2.71e-06	-4.85e-05	-0.000130943	3.86e-07	3.85e-06	0.00191777
		0.2945		0.0253491	0.0431283	0.0378707	0.0561712	0.0552126	0.0456731	0.0436145	0.0399655		0.0121665	0.0191739	0.0120699	0.0111257	0.0255963	0.0179264	0.0200453	0.0406663		0.00515819	1.3e-06	2.79e-06	-5.01e-05	-0.000129854	4.18e-07	3.93e-06	0.00198704
		0.295		0.0254441	0.0432211	0.0379242	0.0561986	0.0554536	0.0458347	0.0436351	0.0399555		0.0121628	0.0192813	0.0120658	0.0111592	0.0257102	0.0180761	0.0200581	0.0408595		0.00519557	1.35e-06	2.86e-06	-5.18e-05	-0.000128585	4.51e-07	4.01e-06	0.00205746
		0.2955		0.0255396	0.0433136	0.0379774	0.0562244	0.0556935	0.0459969	0.0436558	0.0399455		0.0121591	0.0193898	0.0120615	0.0111923	0.0258253	0.0182272	0.0200707	0.0410554		0.00523334	1.41e-06	2.94e-06	-5.35e-05	-0.000127129	4.86e-07	4.09e-06	0.00212901
		0.296		0.0256357	0.0434059	0.0380303	0.0562487	0.0559322	0.0461598	0.0436765	0.0399356		0.0121554	0.0194995	0.012057	0.011225	0.0259414	0.0183794	0.0200832	0.0412538		0.00527151	1.47e-06	3.02e-06	-5.52e-05	-0.000125478	5.21e-07	4.17e-06	0.00220165
		0.2965		0.0257322	0.0434981	0.0380829	0.0562716	0.0561696	0.0463233	0.0436973	0.0399259		0.0121518	0.0196104	0.0120525	0.0112573	0.0260586	0.0185329	0.0200955	0.0414548		0.00531007	1.53e-06	3.1e-06	-5.69e-05	-0.000123625	5.58e-07	4.25e-06	0.00227537
		0.297		0.0258293	0.0435901	0.0381351	0.0562931	0.0564057	0.0464876	0.0437183	0.0399163		0.0121481	0.0197226	0.0120478	0.0112892	0.0261767	0.0186874	0.0201077	0.0416583		0.00534901	1.59e-06	3.19e-06	-5.86e-05	-0.000121564	5.95e-07	4.33e-06	0.00235015
		0.2975		0.0259269	0.0436819	0.0381869	0.0563133	0.0566402	0.0466526	0.0437393	0.0399068		0.0121445	0.0198361	0.0120431	0.0113208	0.0262959	0.0188431	0.0201198	0.0418642		0.00538833	1.65e-06	3.27e-06	-6.04e-05	-0.000119286	6.34e-07	4.4e-06	0.00242595
		0.298		0.026025	0.0437737	0.0382383	0.0563321	0.0568733	0.0468184	0.0437606	0.0398975		0.0121409	0.0199511	0.0120382	0.011352	0.0264161	0.0189998	0.0201319	0.0420726		0.00542801	1.71e-06	3.35e-06	-6.22e-05	-0.000116784	6.73e-07	4.48e-06	0.00250274
		0.2985		0.0261237	0.0438654	0.0382893	0.0563497	0.0571048	0.046985	0.0437821	0.0398883		0.0121373	0.0200676	0.0120332	0.0113829	0.0265372	0.0191575	0.0201439	0.0422833		0.00546805	1.78e-06	3.43e-06	-6.4e-05	-0.000114051	7.14e-07	4.56e-06	0.0025805
		0.299		0.0262229	0.0439571	0.0383399	0.056366	0.0573345	0.0471525	0.0438039	0.0398793		0.0121337	0.0201856	0.0120281	0.0114136	0.0266592	0.0193161	0.0201559	0.0424963		0.00550843	1.84e-06	3.51e-06	-6.58e-05	-0.000111079	7.56e-07	4.63e-06	0.00265919
		0.2995		0.0263225	0.0440487	0.0383901	0.0563812	0.0575626	0.0473208	0.043826	0.0398705		0.0121302	0.0203052	0.0120229	0.0114439	0.0267822	0.0194757	0.020168	0.0427114		0.00554914	1.91e-06	3.6e-06	-6.76e-05	-0.000107859	7.99e-07	4.7e-06	0.00273877
		0.3		0.0264227	0.0441404	0.0384398	0.0563953	0.0577888	0.04749	0.0438484	0.0398619		0.0121267	0.0204264	0.0120177	0.0114739	0.026906	0.0196361	0.0201802	0.0429288		0.00559016	1.98e-06	3.68e-06	-6.95e-05	-0.000104384	8.44e-07	4.77e-06	0.00281919
		0.3005		0.0265234	0.044232	0.0384891	0.0564082	0.0580131	0.0476602	0.0438713	0.0398534		0.0121232	0.0205494	0.0120123	0.0115037	0.0270306	0.0197973	0.0201924	0.0431481		0.00563148	2.05e-06	3.76e-06	-7.13e-05	-0.000100646	8.89e-07	4.84e-06	0.00290043
		0.301		0.0266246	0.0443238	0.0385379	0.0564201	0.0582355	0.0478314	0.0438945	0.0398452		0.0121198	0.0206742	0.0120069	0.0115332	0.027156	0.0199593	0.0202047	0.0433695		0.00567308	2.12e-06	3.85e-06	-7.32e-05	-9.66e-05	9.36e-07	4.91e-06	0.00298243
		0.3015		0.0267262	0.0444156	0.0385862	0.056431	0.058456	0.0480036	0.0439182	0.0398372		0.0121164	0.0208008	0.0120013	0.0115626	0.0272822	0.020122	0.0202172	0.0435927		0.00571493	2.19e-06	3.93e-06	-7.51e-05	-9.23e-05	9.84e-07	4.98e-06	0.00306515
		0.302		0.0268283	0.0445076	0.0386341	0.0564408	0.0586743	0.0481769	0.0439424	0.0398295		0.012113	0.0209294	0.0119957	0.0115917	0.0274091	0.0202853	0.0202298	0.0438176		0.00575703	2.26e-06	4.01e-06	-7.7e-05	-8.78e-05	1.03e-06	5.04e-06	0.00314852
		0.3025		0.0269309	0.0445997	0.0386815	0.0564498	0.0588906	0.0483513	0.0439672	0.039822		0.0121097	0.0210598	0.0119901	0.0116206	0.0275366	0.0204494	0.0202426	0.0440443		0.00579934	2.33e-06	4.09e-06	-7.89e-05	-8.29e-05	1.08e-06	5.11e-06	0.00323251
		0.303		0.0270338	0.0446919	0.0387284	0.0564579	0.0591047	0.0485268	0.0439926	0.0398148		0.0121064	0.0211924	0.0119843	0.0116494	0.0276647	0.020614	0.0202557	0.0442726		0.00584184	2.4e-06	4.18e-06	-8.08e-05	-7.77e-05	1.13e-06	5.17e-06	0.00331706
		0.3035		0.0271371	0.0447844	0.0387749	0.0564651	0.0593166	0.0487035	0.0440185	0.0398078		0.0121031	0.0213269	0.0119785	0.011678	0.0277934	0.0207791	0.0202689	0.0445023		0.0058845	2.48e-06	4.26e-06	-8.27e-05	-7.22e-05	1.19e-06	5.22e-06	0.00340209
		0.304		0.0272408	0.044877	0.0388209	0.0564714	0.0595262	0.0488814	0.0440452	0.0398012		0.0120999	0.0214637	0.0119726	0.0117065	0.0279226	0.0209448	0.0202825	0.0447335		0.00592729	2.55e-06	4.34e-06	-8.46e-05	-6.64e-05	1.24e-06	5.28e-06	0.00348755
		0.3045		0.0273448	0.0449699	0.0388664	0.056477	0.0597335	0.0490605	0.0440725	0.0397948		0.0120967	0.0216026	0.0119667	0.011735	0.0280523	0.0211109	0.0202963	0.044966		0.0059702	2.63e-06	4.42e-06	-8.65e-05	-6.03e-05	1.3e-06	5.33e-06	0.00357339
		0.305		0.0274491	0.0450631	0.0389115	0.0564819	0.0599385	0.049241	0.0441006	0.0397888		0.0120935	0.0217437	0.0119607	0.0117633	0.0281823	0.0212775	0.0203104	0.0451997		0.00601317	2.71e-06	4.5e-06	-8.84e-05	-5.38e-05	1.35e-06	5.38e-06	0.00365951
		0.3055		0.0275537	0.0451565	0.0389561	0.056486	0.060141	0.0494228	0.0441294	0.039783		0.0120904	0.0218872	0.0119547	0.0117916	0.0283127	0.0214444	0.0203249	0.0454345		0.00605618	2.79e-06	4.58e-06	-9.04e-05	-4.69e-05	1.41e-06	5.42e-06	0.00374587
		0.306		0.0276584	0.0452503	0.0390002	0.0564895	0.0603411	0.0496059	0.0441591	0.0397777		0.0120874	0.022033	0.0119486	0.0118199	0.0284434	0.0216116	0.0203398	0.0456703		0.0060992	2.86e-06	4.65e-06	-9.23e-05	-3.98e-05	1.47e-06	5.47e-06	0.0038324
		0.3065		0.0277634	0.0453443	0.0390439	0.0564923	0.0605387	0.0497904	0.0441896	0.0397726		0.0120844	0.0221811	0.0119424	0.0118481	0.0285743	0.0217792	0.020355	0.0459071		0.00614217	2.94e-06	4.73e-06	-9.42e-05	-3.22e-05	1.53e-06	5.5e-06	0.00391903
		0.307		0.0278684	0.0454387	0.0390872	0.0564946	0.0607338	0.0499763	0.044221	0.039768		0.0120814	0.0223317	0.0119362	0.0118763	0.0287055	0.021947	0.0203707	0.0461447		0.00618508	3.02e-06	4.81e-06	-9.61e-05	-2.43e-05	1.59e-06	5.54e-06	0.0040057
		0.3075		0.0279736	0.0455335	0.03913	0.0564963	0.0609264	0.0501637	0.0442534	0.0397637		0.0120784	0.0224848	0.01193	0.0119046	0.0288368	0.0221151	0.0203868	0.046383		0.00622787	3.1e-06	4.88e-06	-9.8e-05	-1.59e-05	1.65e-06	5.57e-06	0.00409233
		0.308		0.0280788	0.0456286	0.0391724	0.0564974	0.0611164	0.0503525	0.0442867	0.0397598		0.0120756	0.0226404	0.0119238	0.011933	0.0289683	0.0222834	0.0204033	0.0466219		0.00627052	3.19e-06	4.95e-06	-9.98e-05	-7.22e-06	1.71e-06	5.6e-06	0.00417888
		0.3085		0.0281841	0.0457241	0.0392144	0.0564981	0.0613038	0.0505429	0.0443211	0.0397563		0.0120727	0.0227986	0.0119175	0.0119614	0.0290999	0.0224519	0.0204203	0.0468614		0.00631299	3.27e-06	5.02e-06	-0.000101696	1.9e-06	1.78e-06	5.62e-06	0.00426526
		0.309		0.0282893	0.04582	0.039256	0.0564983	0.0614886	0.0507347	0.0443565	0.0397532		0.0120699	0.0229594	0.0119112	0.0119899	0.0292316	0.0226206	0.0204379	0.0471014		0.00635523	3.35e-06	5.09e-06	-0.000103536	1.14e-05	1.84e-06	5.64e-06	0.00435143
		0.3095		0.0283944	0.0459163	0.0392972	0.056498	0.0616708	0.0509281	0.044393	0.0397506		0.0120671	0.0231227	0.0119049	0.0120185	0.0293634	0.0227894	0.0204559	0.0473417		0.00639723	3.43e-06	5.16e-06	-0.000105355	2.14e-05	1.91e-06	5.65e-06	0.0044373
		0.31		0.0284994	0.0460131	0.039338	0.0564974	0.0618503	0.0511231	0.0444306	0.0397485		0.0120644	0.0232888	0.0118985	0.0120473	0.0294952	0.0229583	0.0204745	0.0475823		0.00643896	3.51e-06	5.22e-06	-0.000107151	3.18e-05	1.98e-06	5.66e-06	0.00452282
		0.3105		0.0286043	0.0461102	0.0393785	0.0564964	0.0620272	0.0513196	0.0444693	0.0397468		0.0120617	0.0234575	0.0118922	0.0120763	0.0296271	0.0231273	0.0204937	0.0478231		0.00648038	3.6e-06	5.28e-06	-0.00010892	4.26e-05	2.05e-06	5.66e-06	0.00460792
		0.311		0.028709	0.0462078	0.0394186	0.0564951	0.0622014	0.0515177	0.0445093	0.0397455		0.0120591	0.023629	0.0118858	0.0121054	0.0297589	0.0232964	0.0205134	0.0480639		0.00652146	3.68e-06	5.34e-06	-0.000110659	5.39e-05	2.12e-06	5.66e-06	0.00469253
		0.3115		0.0288135	0.0463058	0.0394584	0.0564935	0.0623729	0.0517174	0.0445505	0.0397448		0.0120565	0.0238032	0.0118794	0.0121348	0.0298908	0.0234655	0.0205338	0.0483048		0.00656219	3.76e-06	5.4e-06	-0.000112366	6.56e-05	2.19e-06	5.65e-06	0.00477659
		0.312		0.0289177	0.0464042	0.0394979	0.0564916	0.0625418	0.0519187	0.044593	0.0397446		0.0120539	0.0239801	0.0118731	0.0121644	0.0300227	0.0236347	0.0205548	0.0485457		0.00660254	3.85e-06	5.45e-06	-0.000114037	7.78e-05	2.26e-06	5.63e-06	0.00486004
		0.3125		0.0290216	0.0465031	0.0395371	0.0564894	0.062708	0.0521216	0.0446368	0.039745		0.0120514	0.0241598	0.0118667	0.0121943	0.0301545	0.0238039	0.0205764	0.0487863		0.00664249	3.93e-06	5.5e-06	-0.000115669	9.05e-05	2.33e-06	5.61e-06	0.00494282
		0.313		0.0291251	0.0466024	0.039576	0.0564871	0.0628715	0.0523261	0.0446819	0.0397459		0.012049	0.0243423	0.0118604	0.0122244	0.0302863	0.0239732	0.0205987	0.0490267		0.00668201	4.01e-06	5.55e-06	-0.000117258	0.000103605	2.4e-06	5.58e-06	0.00502488
		0.3135		0.0292282	0.0467021	0.0396146	0.0564846	0.0630323	0.0525321	0.0447284	0.0397473		0.0120465	0.0245275	0.011854	0.0122548	0.0304181	0.0241424	0.0206217	0.0492668		0.00672109	4.09e-06	5.59e-06	-0.000118801	0.000117253	2.48e-06	5.55e-06	0.00510618
		0.314		0.0293309	0.0468022	0.039653	0.0564819	0.0631904	0.0527398	0.0447763	0.0397493		0.0120441	0.0247155	0.0118477	0.0122856	0.0305499	0.0243116	0.0206453	0.0495065		0.0067597	4.18e-06	5.63e-06	-0.000120294	0.000131403	2.55e-06	5.5e-06	0.00518664
		0.3145		0.0294331	0.0469028	0.0396911	0.0564791	0.0633459	0.0529489	0.0448256	0.039752		0.0120418	0.0249063	0.0118415	0.0123167	0.0306816	0.0244807	0.0206697	0.0497457		0.00679784	4.26e-06	5.67e-06	-0.000121734	0.000146063	2.63e-06	5.45e-06	0.00526625
		0.315		0.0295348	0.0470037	0.039729	0.0564762	0.0634986	0.0531597	0.0448764	0.0397552		0.0120395	0.0250999	0.0118352	0.0123482	0.0308133	0.0246498	0.0206948	0.0499844		0.00683548	4.34e-06	5.7e-06	-0.000123116	0.000161241	2.71e-06	5.39e-06	0.00534494
		0.3155		0.0296359	0.047105	0.0397668	0.0564732	0.0636487	0.0533719	0.0449287	0.0397591		0.0120372	0.0252963	0.011829	0.0123801	0.0309449	0.0248188	0.0207207	0.0502225		0.00687262	4.42e-06	5.73e-06	-0.000124436	0.000176947	2.79e-06	5.33e-06	0.00542269
		0.316		0.0297365	0.0472066	0.0398043	0.0564703	0.0637961	0.0535856	0.0449826	0.0397637		0.012035	0.0254953	0.0118228	0.0124123	0.0310765	0.0249877	0.0207473	0.0504599		0.00690922	4.5e-06	5.75e-06	-0.000125692	0.000193187	2.86e-06	5.25e-06	0.00549945
		0.3165		0.0298365	0.0473085	0.0398417	0.0564672	0.0639408	0.0538008	0.045038	0.0397689		0.0120328	0.0256972	0.0118167	0.0124451	0.0312081	0.0251565	0.0207747	0.0506967		0.0069453	4.58e-06	5.77e-06	-0.000126877	0.00020997	2.94e-06	5.17e-06	0.00557519
		0.317		0.0299358	0.0474108	0.0398789	0.0564642	0.0640828	0.0540174	0.045095	0.0397748		0.0120306	0.0259016	0.0118106	0.0124782	0.0313396	0.0253251	0.0208029	0.0509327		0.00698082	4.65e-06	5.79e-06	-0.000127988	0.000227303	3.02e-06	5.08e-06	0.00564987
		0.3175		0.0300346	0.0475133	0.0399161	0.0564613	0.0642221	0.0542353	0.0451536	0.0397814		0.0120285	0.0261088	0.0118046	0.0125118	0.0314711	0.0254936	0.0208319	0.0511679		0.00701579	4.73e-06	5.79e-06	-0.00012902	0.000245195	3.1e-06	4.98e-06	0.00572348
		0.318		0.0301326	0.0476161	0.0399531	0.0564584	0.0643588	0.0544545	0.0452138	0.0397887		0.0120264	0.0263186	0.0117987	0.0125459	0.0316026	0.025662	0.0208617	0.0514023		0.00705019	4.81e-06	5.8e-06	-0.000129969	0.000263652	3.19e-06	4.87e-06	0.00579597
		0.3185		0.03023	0.047719	0.03999	0.0564556	0.0644928	0.054675	0.0452757	0.0397968		0.0120243	0.0265309	0.0117928	0.0125806	0.0317341	0.0258302	0.0208923	0.0516359		0.00708401	4.88e-06	5.79e-06	-0.00013083	0.000282681	3.27e-06	4.75e-06	0.00586732
		0.319		0.0303267	0.0478222	0.0400269	0.0564529	0.0646241	0.0548967	0.0453393	0.0398057		0.0120223	0.0267458	0.0117871	0.0126157	0.0318655	0.0259982	0.0209238	0.0518686		0.00711726	4.95e-06	5.79e-06	-0.000131598	0.00030229	3.35e-06	4.61e-06	0.00593751
		0.3195		0.0304227	0.0479254	0.0400637	0.0564503	0.0647527	0.0551196	0.0454046	0.0398153		0.0120202	0.0269632	0.0117814	0.0126514	0.031997	0.026166	0.0209561	0.0521004		0.0071499	5.02e-06	5.77e-06	-0.000132268	0.000322484	3.43e-06	4.47e-06	0.00600653
		0.32		0.030518	0.0480287	0.0401005	0.0564479	0.0648787	0.0553435	0.0454717	0.0398257		0.0120183	0.0271829	0.0117758	0.0126876	0.0321285	0.0263337	0.0209892	0.0523314		0.00718196	5.09e-06	5.75e-06	-0.000132835	0.000343271	3.51e-06	4.32e-06	0.00607434
		0.3205		0.0306125	0.0481321	0.0401373	0.0564457	0.065002	0.0555684	0.0455405	0.039837		0.0120163	0.027405	0.0117703	0.0127245	0.0322599	0.0265012	0.0210232	0.0525614		0.00721341	5.16e-06	5.72e-06	-0.000133294	0.000364655	3.6e-06	4.16e-06	0.00614093
		0.321		0.0307063	0.0482353	0.0401741	0.0564437	0.0651226	0.0557943	0.0456111	0.0398491		0.0120144	0.0276294	0.0117649	0.0127619	0.0323914	0.0266685	0.0210581	0.0527905		0.00724426	5.22e-06	5.69e-06	-0.000133639	0.000386642	3.68e-06	3.98e-06	0.00620629
		0.3215		0.0307993	0.0483386	0.040211	0.0564419	0.0652406	0.0560211	0.0456835	0.0398621		0.0120125	0.027856	0.0117597	0.0127999	0.0325229	0.0268356	0.0210938	0.0530187		0.0072745	5.28e-06	5.64e-06	-0.000133865	0.000409239	3.76e-06	3.79e-06	0.0062704
		0.322		0.0308916	0.0484416	0.0402479	0.0564404	0.0653559	0.0562487	0.0457576	0.039876		0.0120107	0.0280847	0.0117546	0.0128385	0.0326544	0.0270026	0.0211304	0.053246		0.00730413	5.34e-06	5.59e-06	-0.000133966	0.000432448	3.85e-06	3.59e-06	0.00633326
		0.3225		0.0309831	0.0485445	0.0402848	0.0564391	0.0654685	0.0564771	0.0458336	0.0398907		0.0120088	0.0283155	0.0117496	0.0128778	0.032786	0.0271694	0.0211679	0.0534724		0.00733315	5.4e-06	5.54e-06	-0.000133936	0.000456276	3.93e-06	3.38e-06	0.00639484
		0.323		0.0310739	0.048647	0.0403219	0.0564381	0.0655784	0.0567062	0.0459114	0.0399064		0.012007	0.0285483	0.0117447	0.0129177	0.0329176	0.027336	0.0212062	0.0536979		0.00736155	5.45e-06	5.47e-06	-0.00013377	0.000480726	4.01e-06	3.15e-06	0.00645514
		0.3235		0.0311639	0.0487493	0.040359	0.0564375	0.0656857	0.0569359	0.0459911	0.0399231		0.0120052	0.028783	0.01174	0.0129582	0.0330492	0.0275025	0.0212455	0.0539224		0.00738934	5.5e-06	5.39e-06	-0.000133461	0.000505801	4.09e-06	2.91e-06	0.00651416
		0.324		0.0312531	0.0488512	0.0403963	0.0564371	0.0657903	0.0571663	0.0460726	0.0399407		0.0120034	0.0290194	0.0117355	0.0129994	0.0331808	0.0276688	0.0212856	0.0541461		0.00741651	5.55e-06	5.31e-06	-0.000133004	0.000531505	4.18e-06	2.66e-06	0.00657189
		0.3245		0.0313415	0.0489527	0.0404337	0.0564372	0.0658922	0.0573972	0.046156	0.0399593		0.0120017	0.0292576	0.0117311	0.0130413	0.0333125	0.027835	0.0213266	0.0543689		0.00744307	5.59e-06	5.22e-06	-0.000132391	0.00055784	4.26e-06	2.39e-06	0.00662832
		0.325		0.0314292	0.0490538	0.0404712	0.0564375	0.0659916	0.0576285	0.0462412	0.0399789		0.012	0.0294975	0.011727	0.0130839	0.0334443	0.0280011	0.0213684	0.0545908		0.00746901	5.63e-06	5.12e-06	-0.000131617	0.000584809	4.34e-06	2.11e-06	0.00668346
		0.3255		0.031516	0.0491543	0.040509	0.0564383	0.0660882	0.0578602	0.0463283	0.0399996		0.0119983	0.0297388	0.011723	0.0131272	0.0335761	0.0281671	0.0214112	0.0548119		0.00749435	5.67e-06	5e-06	-0.000130675	0.000612413	4.42e-06	1.81e-06	0.00673729
		0.326		0.0316021	0.0492543	0.0405469	0.0564395	0.0661823	0.0580923	0.0464172	0.0400213		0.0119966	0.0299816	0.0117192	0.0131712	0.0337079	0.0283329	0.0214548	0.0550321		0.00751907	5.7e-06	4.88e-06	-0.000129559	0.000640652	4.5e-06	1.5e-06	0.00678983
		0.3265		0.0316874	0.0493538	0.040585	0.0564411	0.0662738	0.0583247	0.046508	0.040044		0.0119949	0.0302257	0.0117156	0.0132159	0.0338397	0.0284986	0.0214992	0.0552515		0.00754319	5.73e-06	4.75e-06	-0.00012826	0.000669528	4.58e-06	1.17e-06	0.00684107
		0.327		0.031772	0.0494526	0.0406234	0.0564432	0.0663627	0.0585572	0.0466007	0.0400679		0.0119932	0.0304711	0.0117123	0.0132612	0.0339716	0.0286643	0.0215446	0.0554701		0.0075667	5.75e-06	4.6e-06	-0.000126774	0.00069904	4.65e-06	8.31e-07	0.00689101
		0.3275		0.0318557	0.0495509	0.040662	0.0564457	0.0664491	0.0587899	0.0466952	0.0400929		0.0119916	0.0307177	0.0117092	0.0133073	0.0341035	0.0288298	0.0215907	0.0556879		0.00758962	5.77e-06	4.45e-06	-0.000125092	0.000729187	4.73e-06	4.7e-07	0.00693966
		0.328		0.0319387	0.0496484	0.0407008	0.0564486	0.0665329	0.0590226	0.0467915	0.040119		0.01199	0.0309654	0.0117063	0.0133542	0.0342354	0.0289953	0.0216377	0.055905		0.00761194	5.79e-06	4.28e-06	-0.000123207	0.000759968	4.81e-06	9.31e-08	0.00698702
		0.3285		0.0320209	0.0497453	0.0407399	0.0564521	0.0666142	0.0592553	0.0468897	0.0401463		0.0119883	0.0312141	0.0117037	0.0134017	0.0343674	0.0291607	0.0216855	0.0561213		0.00763366	5.79e-06	4.11e-06	-0.000121112	0.000791381	4.88e-06	-3.01e-07	0.0070331
		0.329		0.0321023	0.0498415	0.0407793	0.0564561	0.0666931	0.0594879	0.0469897	0.0401747		0.0119867	0.0314637	0.0117013	0.0134499	0.0344993	0.029326	0.0217341	0.0563369		0.0076548	5.8e-06	3.92e-06	-0.0001188	0.000823421	4.95e-06	-7.14e-07	0.0070779
		0.3295		0.032183	0.049937	0.040819	0.0564606	0.0667695	0.0597204	0.0470915	0.0402044		0.0119851	0.0317142	0.0116993	0.0134989	0.0346311	0.0294912	0.0217835	0.0565517		0.00767536	5.79e-06	3.71e-06	-0.000116263	0.000856086	5.02e-06	-1.14e-06	0.00712143
		0.33		0.0322629	0.0500318	0.0408589	0.0564656	0.0668434	0.0599527	0.047195	0.0402352		0.0119835	0.0319655	0.0116975	0.0135486	0.034763	0.0296564	0.0218337	0.0567659		0.00769535	5.79e-06	3.5e-06	-0.000113494	0.000889371	5.09e-06	-1.59e-06	0.00716371
		0.3305		0.032342	0.0501258	0.0408992	0.0564712	0.066915	0.0601846	0.0473003	0.0402674		0.011982	0.0322175	0.0116961	0.0135989	0.0348947	0.0298216	0.0218846	0.0569795		0.00771476	5.77e-06	3.27e-06	-0.000110484	0.000923271	5.16e-06	-2.06e-06	0.00720473
		0.331		0.0324203	0.050219	0.0409398	0.0564774	0.0669842	0.0604162	0.0474074	0.0403007		0.0119804	0.0324701	0.0116949	0.01365	0.0350264	0.0299866	0.0219362	0.0571924		0.00773361	5.75e-06	3.02e-06	-0.000107225	0.000957779	5.22e-06	-2.55e-06	0.00724451
		0.3315		0.0324979	0.0503114	0.0409807	0.0564841	0.067051	0.0606474	0.0475161	0.0403354		0.0119788	0.0327233	0.0116941	0.0137017	0.035158	0.0301516	0.0219886	0.0574046		0.0077519	5.72e-06	2.77e-06	-0.000103711	0.000992887	5.28e-06	-3.05e-06	0.00728307
		0.332		0.0325747	0.0504031	0.0410219	0.0564915	0.0671156	0.0608781	0.0476265	0.0403713		0.0119772	0.0329769	0.0116936	0.0137542	0.0352894	0.0303165	0.0220416	0.0576162		0.00776964	5.69e-06	2.5e-06	-9.99e-05	0.00102859	5.34e-06	-3.58e-06	0.0073204
		0.3325		0.0326507	0.050494	0.0410635	0.0564994	0.0671779	0.0611082	0.0477385	0.0404086		0.0119757	0.0332309	0.0116935	0.0138073	0.0354206	0.0304814	0.0220953	0.0578273		0.00778684	5.64e-06	2.21e-06	-9.59e-05	0.00106488	5.4e-06	-4.12e-06	0.00735653
		0.333		0.032726	0.050584	0.0411054	0.0565079	0.0672379	0.0613377	0.047852	0.0404472		0.0119741	0.0334852	0.0116938	0.013861	0.0355516	0.0306462	0.0221496	0.0580377		0.0078035	5.59e-06	1.91e-06	-9.15e-05	0.00110173	5.45e-06	-4.69e-06	0.00739146
		0.3335		0.0328005	0.0506733	0.0411477	0.0565171	0.0672958	0.0615665	0.0479672	0.0404871		0.0119726	0.0337397	0.0116945	0.0139154	0.0356824	0.0308108	0.0222045	0.0582476		0.00781963	5.54e-06	1.59e-06	-8.69e-05	0.00113916	5.5e-06	-5.28e-06	0.00742522
		0.334		0.0328742	0.0507617	0.0411903	0.0565269	0.0673514	0.0617945	0.0480838	0.0405284		0.011971	0.0339944	0.0116955	0.0139705	0.0358129	0.0309754	0.02226	0.058457		0.00783524	5.47e-06	1.26e-06	-8.2e-05	0.00117713	5.55e-06	-5.89e-06	0.0074578
		0.3345		0.0329472	0.0508494	0.0412333	0.0565374	0.067405	0.0620217	0.0482018	0.0405711		0.0119695	0.0342491	0.011697	0.0140261	0.035943	0.0311398	0.022316	0.0586658		0.00785034	5.39e-06	9.07e-07	-7.68e-05	0.00121564	5.59e-06	-6.52e-06	0.00748924
		0.335		0.0330193	0.0509362	0.0412767	0.0565485	0.0674565	0.0622481	0.0483213	0.0406153		0.0119679	0.0345038	0.0116989	0.0140823	0.0360728	0.0313041	0.0223725	0.0588742		0.00786493	5.31e-06	5.41e-07	-7.12e-05	0.00125467	5.63e-06	-7.17e-06	0.00751954
		0.3355		0.0330907	0.0510222	0.0413204	0.0565603	0.0675059	0.0624734	0.048442	0.0406608		0.0119664	0.0347584	0.0117013	0.0141391	0.0362021	0.0314682	0.0224294	0.059082		0.00787902	5.22e-06	1.57e-07	-6.54e-05	0.00129421	5.67e-06	-7.85e-06	0.00754873
		0.336		0.0331613	0.0511074	0.0413644	0.0565728	0.0675533	0.0626978	0.048564	0.0407078		0.0119648	0.0350127	0.0117041	0.0141964	0.0363309	0.0316322	0.0224868	0.0592895		0.00789262	5.12e-06	-2.44e-07	-5.92e-05	0.00133424	5.7e-06	-8.54e-06	0.0075768
		0.3365		0.0332311	0.0511917	0.0414089	0.0565859	0.0675987	0.0629212	0.0486873	0.0407562		0.0119633	0.0352667	0.0117074	0.0142543	0.0364591	0.0317959	0.0225446	0.0594965		0.00790574	5e-06	-6.63e-07	-5.26e-05	0.00137474	5.73e-06	-9.27e-06	0.0076038
		0.337		0.0333001	0.0512753	0.0414536	0.0565998	0.0676422	0.0631434	0.0488116	0.0408061		0.0119617	0.0355204	0.0117112	0.0143126	0.0365868	0.0319593	0.0226028	0.0597031		0.00791838	4.88e-06	-1.1e-06	-4.58e-05	0.00141569	5.75e-06	-1e-05	0.00762972
		0.3375		0.0333682	0.051358	0.0414987	0.0566143	0.0676837	0.0633645	0.048937	0.0408575		0.0119601	0.0357735	0.0117155	0.0143714	0.0367138	0.0321225	0.0226613	0.0599094		0.00793056	4.75e-06	-1.56e-06	-3.85e-05	0.00145707	5.77e-06	-1.08e-05	0.00765459
		0.338		0.0334356	0.05144	0.0415442	0.0566296	0.0677234	0.0635844	0.0490633	0.0409104		0.0119586	0.036026	0.0117204	0.0144306	0.0368401	0.0322854	0.0227202	0.0601154		0.00794229	4.6e-06	-2.03e-06	-3.09e-05	0.00149887	5.79e-06	-1.16e-05	0.00767842
		0.3385		0.0335021	0.0515211	0.04159	0.0566455	0.0677613	0.063803	0.0491905	0.0409647		0.011957	0.0362778	0.0117258	0.0144902	0.0369657	0.0324479	0.0227794	0.060321		0.00795356	4.45e-06	-2.53e-06	-2.29e-05	0.00154105	5.79e-06	-1.24e-05	0.00770124
		0.339		0.0335678	0.0516014	0.0416361	0.0566622	0.0677975	0.0640203	0.0493185	0.0410206		0.0119554	0.0365288	0.0117318	0.0145501	0.0370906	0.03261	0.0228388	0.0605264		0.0079644	4.28e-06	-3.04e-06	-1.45e-05	0.00158359	5.8e-06	-1.32e-05	0.00772305
		0.3395		0.0336327	0.051681	0.0416825	0.0566796	0.0678318	0.0642362	0.0494472	0.0410781		0.0119539	0.0367788	0.0117383	0.0146104	0.0372146	0.0327717	0.0228985	0.0607316		0.00797481	4.11e-06	-3.58e-06	-5.75e-06	0.00162646	5.79e-06	-1.41e-05	0.00774389
		0.34		0.0336967	0.0517598	0.0417292	0.0566977	0.0678645	0.0644508	0.0495765	0.041137		0.0119523	0.0370278	0.0117455	0.014671	0.0373378	0.032933	0.0229585	0.0609365		0.00798479	3.92e-06	-4.13e-06	3.43e-06	0.00166965	5.79e-06	-1.5e-05	0.00776377
		0.3405		0.0337599	0.0518378	0.0417762	0.0567166	0.0678956	0.0646638	0.0497063	0.0411975		0.0119507	0.0372757	0.0117533	0.0147319	0.0374602	0.0330938	0.0230187	0.0611412		0.00799436	3.71e-06	-4.71e-06	1.3e-05	0.0017131	5.77e-06	-1.59e-05	0.00778271
		0.341		0.0338224	0.051915	0.0418235	0.0567362	0.067925	0.0648754	0.0498365	0.0412596		0.0119491	0.0375222	0.0117617	0.014793	0.0375816	0.033254	0.0230791	0.0613458		0.00800353	3.5e-06	-5.31e-06	2.3e-05	0.00175681	5.75e-06	-1.68e-05	0.00780072
		0.3415		0.033884	0.0519914	0.041871	0.0567566	0.0679528	0.0650854	0.049967	0.0413232		0.0119475	0.0377675	0.0117708	0.0148544	0.0377022	0.0334138	0.0231397	0.0615503		0.0080123	3.27e-06	-5.93e-06	3.35e-05	0.00180072	5.72e-06	-1.78e-05	0.00781784
		0.342		0.0339448	0.0520671	0.0419188	0.0567776	0.0679791	0.0652938	0.0500978	0.0413884		0.0119459	0.0380112	0.0117805	0.014916	0.0378218	0.0335729	0.0232004	0.0617546		0.00802069	3.02e-06	-6.57e-06	4.44e-05	0.00184482	5.69e-06	-1.88e-05	0.00783407
		0.3425		0.0340049	0.0521421	0.0419667	0.0567995	0.0680039	0.0655005	0.0502288	0.0414551		0.0119442	0.0382533	0.011791	0.0149778	0.0379405	0.0337314	0.0232614	0.0619589		0.0080287	2.77e-06	-7.24e-06	5.57e-05	0.00188905	5.64e-06	-1.98e-05	0.00784944
		0.343		0.0340642	0.0522163	0.0420149	0.056822	0.0680273	0.0657055	0.0503598	0.0415234		0.0119426	0.0384937	0.0118022	0.0150397	0.0380582	0.0338893	0.0233224	0.0621631		0.00803634	2.5e-06	-7.93e-06	6.75e-05	0.00193339	5.59e-06	-2.09e-05	0.00786397
		0.3435		0.0341227	0.0522897	0.0420632	0.0568453	0.0680492	0.0659088	0.0504909	0.0415933		0.011941	0.0387323	0.0118141	0.0151018	0.038175	0.0340465	0.0233837	0.0623673		0.00804362	2.21e-06	-8.64e-06	7.98e-05	0.00197779	5.54e-06	-2.19e-05	0.00787767
		0.344		0.0341806	0.0523624	0.0421116	0.0568693	0.0680698	0.0661102	0.0506219	0.0416647		0.0119393	0.0389689	0.0118268	0.0151641	0.0382907	0.034203	0.023445	0.0625714		0.00805054	1.91e-06	-9.37e-06	9.25e-05	0.00202221	5.47e-06	-2.3e-05	0.00789058
		0.3445		0.0342377	0.0524344	0.0421602	0.0568941	0.0680891	0.0663097	0.0507527	0.0417377		0.0119377	0.0392035	0.0118402	0.0152264	0.0384055	0.0343588	0.0235064	0.0627756		0.00805713	1.59e-06	-1.01e-05	0.000105721	0.00206661	5.39e-06	-2.42e-05	0.0079027
		0.345		0.0342942	0.0525057	0.0422088	0.0569196	0.0681071	0.0665074	0.0508833	0.0418123		0.011936	0.0394358	0.0118545	0.0152889	0.0385192	0.0345139	0.023568	0.0629799		0.00806338	1.26e-06	-1.09e-05	0.000119439	0.00211095	5.31e-06	-2.53e-05	0.00791407
		0.3455		0.03435	0.0525763	0.0422575	0.0569458	0.0681238	0.0667031	0.0510136	0.0418884		0.0119343	0.0396659	0.0118695	0.0153514	0.0386319	0.0346682	0.0236296	0.0631842		0.0080693	9.07e-07	-1.17e-05	0.000133661	0.00215518	5.22e-06	-2.65e-05	0.00792469
		0.346		0.0344053	0.0526461	0.0423062	0.0569727	0.0681393	0.0668969	0.0511435	0.0419661		0.0119327	0.0398936	0.0118854	0.015414	0.0387436	0.0348217	0.0236913	0.0633887		0.00807491	5.41e-07	-1.26e-05	0.000148393	0.00219928	5.12e-06	-2.77e-05	0.0079346
		0.3465		0.0344599	0.0527153	0.0423549	0.0570004	0.0681537	0.0670886	0.051273	0.0420453		0.011931	0.0401189	0.0119022	0.0154767	0.0388542	0.0349744	0.0237531	0.0635933		0.00808021	1.57e-07	-1.34e-05	0.000163646	0.00224319	5e-06	-2.89e-05	0.00794381
		0.347		0.0345139	0.0527837	0.0424036	0.0570287	0.068167	0.0672783	0.051402	0.042126		0.0119293	0.0403415	0.0119199	0.0155394	0.0389638	0.0351263	0.0238149	0.0637981		0.0080852	-2.44e-07	-1.43e-05	0.000179426	0.0022869	4.88e-06	-3.02e-05	0.00795235
		0.3475		0.0345675	0.0528515	0.0424523	0.0570578	0.0681791	0.0674659	0.0515304	0.0422083		0.0119276	0.0405615	0.0119384	0.0156022	0.0390724	0.0352774	0.0238768	0.0640032		0.00808991	-6.63e-07	-1.52e-05	0.000195741	0.00233035	4.75e-06	-3.15e-05	0.00796023
		0.348		0.0346205	0.0529185	0.0425009	0.0570875	0.0681903	0.0676514	0.0516582	0.042292		0.0119259	0.0407787	0.0119579	0.015665	0.03918	0.0354277	0.0239387	0.0642085		0.00809433	-1.1e-06	-1.61e-05	0.000212601	0.00237354	4.6e-06	-3.28e-05	0.00796748
		0.3485		0.034673	0.0529849	0.0425495	0.057118	0.0682004	0.0678347	0.0517852	0.0423772		0.0119242	0.0409931	0.0119783	0.0157277	0.0392864	0.0355771	0.0240007	0.0644141		0.00809847	-1.56e-06	-1.71e-05	0.000230011	0.00241641	4.45e-06	-3.42e-05	0.00797411
		0.349		0.0347252	0.0530505	0.042598	0.0571491	0.0682096	0.0680158	0.0519115	0.0424639		0.0119225	0.0412046	0.0119997	0.0157905	0.0393919	0.0357257	0.0240627	0.0646201		0.00810235	-2.03e-06	-1.81e-05	0.000247981	0.00245895	4.28e-06	-3.55e-05	0.00798016
		0.3495		0.0347769	0.0531155	0.0426464	0.0571808	0.0682178	0.0681947	0.0520369	0.042552		0.0119208	0.041413	0.012022	0.0158533	0.0394963	0.0358734	0.0241247	0.0648264		0.00810597	-2.53e-06	-1.91e-05	0.000266517	0.00250113	4.11e-06	-3.69e-05	0.00798563
		0.35		0.0348283	0.0531797	0.0426947	0.0572132	0.0682252	0.0683713	0.0521615	0.0426416		0.011919	0.0416184	0.0120454	0.015916	0.0395997	0.0360202	0.0241867	0.0650331		0.00810933	-3.04e-06	-2.01e-05	0.000285626	0.00254293	3.92e-06	-3.83e-05	0.00799056
		0.3505		0.0348794	0.0532433	0.0427429	0.0572463	0.0682317	0.0685457	0.0522852	0.0427325		0.0119173	0.0418207	0.0120698	0.0159787	0.039702	0.0361661	0.0242486	0.0652403		0.00811245	-3.58e-06	-2.12e-05	0.000305314	0.00258431	3.71e-06	-3.98e-05	0.00799496
		0.351		0.0349302	0.0533061	0.042791	0.0572799	0.0682374	0.0687178	0.0524079	0.0428248		0.0119156	0.0420198	0.0120953	0.0160414	0.0398033	0.0363111	0.0243106	0.0654479		0.00811533	-4.13e-06	-2.23e-05	0.000325589	0.00262526	3.5e-06	-4.12e-05	0.00799885
		0.3515		0.0349808	0.0533683	0.0428389	0.0573141	0.0682424	0.0688876	0.0525297	0.0429184		0.0119139	0.0422155	0.0121218	0.016104	0.0399036	0.0364552	0.0243726	0.0656561		0.00811799	-4.71e-06	-2.34e-05	0.000346456	0.00266576	3.27e-06	-4.27e-05	0.00800226
		0.352		0.0350312	0.0534297	0.0428867	0.057349	0.0682467	0.069055	0.0526504	0.0430133		0.0119122	0.042408	0.0121494	0.0161665	0.0400028	0.0365983	0.0244345	0.0658648		0.00812042	-5.31e-06	-2.46e-05	0.000367922	0.00270579	3.02e-06	-4.43e-05	0.0080052
		0.3525		0.0350815	0.0534904	0.0429344	0.0573844	0.0682502	0.0692201	0.0527701	0.0431094		0.0119104	0.042597	0.0121782	0.0162289	0.040101	0.0367406	0.0244963	0.066074		0.00812264	-5.93e-06	-2.58e-05	0.000389992	0.00274533	2.77e-06	-4.58e-05	0.00800771
		0.353		0.0351316	0.0535504	0.0429819	0.0574203	0.0682531	0.0693829	0.0528886	0.0432068		0.0119087	0.0427827	0.012208	0.0162913	0.0401982	0.0368818	0.0245581	0.0662838		0.00812465	-6.57e-06	-2.7e-05	0.00041267	0.00278436	2.5e-06	-4.74e-05	0.00800979
		0.3535		0.0351817	0.0536096	0.0430293	0.0574567	0.0682554	0.0695434	0.0530061	0.0433053		0.011907	0.0429648	0.012239	0.0163535	0.0402944	0.0370221	0.0246198	0.0664943		0.00812645	-7.24e-06	-2.82e-05	0.000435963	0.00282287	2.21e-06	-4.9e-05	0.00801147
		0.354		0.0352318	0.0536681	0.0430765	0.0574936	0.0682572	0.0697015	0.0531224	0.043405		0.0119053	0.0431435	0.0122712	0.0164156	0.0403895	0.0371614	0.0246815	0.0667054		0.00812807	-7.93e-06	-2.95e-05	0.000459873	0.00286084	1.91e-06	-5.06e-05	0.00801278
		0.3545		0.035282	0.0537258	0.0431236	0.0575311	0.0682584	0.0698573	0.0532376	0.0435057		0.0119036	0.0433186	0.0123046	0.0164776	0.0404836	0.0372997	0.0247431	0.0669171		0.0081295	-8.64e-06	-3.07e-05	0.000484406	0.00289827	1.59e-06	-5.22e-05	0.00801373
		0.355		0.0353322	0.0537827	0.0431705	0.0575689	0.0682591	0.0700107	0.0533517	0.0436075		0.0119019	0.0434902	0.0123392	0.0165395	0.0405767	0.037437	0.0248045	0.0671295		0.00813074	-9.37e-06	-3.21e-05	0.000509564	0.00293512	1.26e-06	-5.39e-05	0.00801434
		0.3555		0.0353826	0.0538388	0.0432173	0.0576072	0.0682593	0.0701618	0.0534645	0.0437104		0.0119002	0.0436581	0.012375	0.0166012	0.0406688	0.0375733	0.0248658	0.0673426		0.00813182	-1.01e-05	-3.34e-05	0.000535351	0.00297141	9.07e-07	-5.56e-05	0.00801464
		0.356		0.0354331	0.0538942	0.0432639	0.0576458	0.0682592	0.0703106	0.0535762	0.0438142		0.0118986	0.0438225	0.0124121	0.0166627	0.0407599	0.0377085	0.024927	0.0675564		0.00813272	-1.09e-05	-3.48e-05	0.00056177	0.00300711	5.41e-07	-5.73e-05	0.00801464
		0.3565		0.0354839	0.0539487	0.0433104	0.0576848	0.0682586	0.0704571	0.0536867	0.043919		0.0118969	0.0439832	0.0124505	0.016724	0.0408499	0.0378427	0.0249881	0.067771		0.00813347	-1.17e-05	-3.62e-05	0.000588821	0.00304222	1.57e-07	-5.9e-05	0.00801438
		0.357		0.035535	0.0540024	0.0433567	0.0577241	0.0682577	0.0706012	0.0537959	0.0440247		0.0118953	0.0441404	0.0124901	0.0167852	0.040939	0.0379758	0.025049	0.0679862		0.00813406	-1.26e-05	-3.76e-05	0.000616507	0.00307673	-2.44e-07	-6.07e-05	0.00801386
		0.3575		0.0355865	0.0540552	0.0434029	0.0577638	0.0682565	0.0707431	0.053904	0.0441312		0.0118937	0.0442938	0.0125311	0.0168461	0.041027	0.0381077	0.0251097	0.0682021		0.0081345	-1.34e-05	-3.9e-05	0.000644829	0.00311063	-6.63e-07	-6.25e-05	0.00801311
		0.358		0.0356383	0.0541072	0.043449	0.0578036	0.068255	0.0708827	0.0540109	0.0442386		0.0118921	0.0444437	0.0125734	0.0169068	0.041114	0.0382386	0.0251701	0.0684188		0.0081348	-1.43e-05	-4.05e-05	0.000673786	0.00314391	-1.1e-06	-6.43e-05	0.00801216
		0.3585		0.0356905	0.0541584	0.0434949	0.0578437	0.0682532	0.07102	0.0541166	0.0443468		0.0118905	0.0445899	0.012617	0.0169673	0.0412	0.0383684	0.0252304	0.0686361		0.00813496	-1.52e-05	-4.2e-05	0.000703379	0.00317658	-1.56e-06	-6.6e-05	0.00801102
		0.359		0.0357433	0.0542088	0.0435407	0.057884	0.0682513	0.0711551	0.054221	0.0444558		0.0118889	0.0447325	0.012662	0.0170275	0.041285	0.038497	0.0252904	0.0688542		0.00813499	-1.61e-05	-4.35e-05	0.000733607	0.00320862	-2.03e-06	-6.78e-05	0.00800971
		0.3595		0.0357966	0.0542584	0.0435864	0.0579244	0.0682492	0.0712879	0.0543243	0.0445655		0.0118874	0.0448715	0.0127083	0.0170874	0.0413689	0.0386245	0.0253502	0.0690729		0.00813489	-1.71e-05	-4.51e-05	0.000764467	0.00324003	-2.53e-06	-6.97e-05	0.00800826
		0.36		0.0358505	0.0543071	0.043632	0.0579648	0.0682469	0.0714186	0.0544264	0.0446759		0.0118859	0.0450068	0.0127561	0.017147	0.0414518	0.0387509	0.0254097	0.0692923		0.00813468	-1.81e-05	-4.67e-05	0.000795958	0.00327081	-3.04e-06	-7.15e-05	0.00800668
		0.3605		0.035905	0.054355	0.0436775	0.0580054	0.0682446	0.071547	0.0545273	0.0447869		0.0118845	0.0451386	0.0128052	0.0172063	0.0415336	0.0388762	0.0254688	0.0695123		0.00813434	-1.91e-05	-4.83e-05	0.000828076	0.00330096	-3.58e-06	-7.33e-05	0.008005
		0.361		0.0359603	0.0544021	0.0437228	0.0580459	0.0682422	0.0716733	0.054627	0.0448985		0.011883	0.0452668	0.0128558	0.0172653	0.0416144	0.0390003	0.0255276	0.069733		0.0081339	-2.01e-05	-4.99e-05	0.000860817	0.00333047	-4.13e-06	-7.52e-05	0.00800324
		0.3615		0.0360163	0.0544484	0.0437681	0.0580864	0.0682397	0.0717973	0.0547256	0.0450107		0.0118817	0.0453914	0.0129078	0.0173238	0.0416941	0.0391233	0.0255861	0.0699542		0.00813335	-2.12e-05	-5.16e-05	0.000894177	0.00335935	-4.71e-06	-7.7e-05	0.00800142
		0.362		0.0360732	0.0544939	0.0438133	0.0581268	0.0682373	0.0719193	0.054823	0.0451235		0.0118803	0.0455125	0.0129613	0.017382	0.0417728	0.0392451	0.0256442	0.070176		0.0081327	-2.23e-05	-5.32e-05	0.00092815	0.00338759	-5.31e-06	-7.89e-05	0.00799956
		0.3625		0.0361309	0.0545387	0.0438584	0.0581671	0.0682349	0.0720392	0.0549193	0.0452367		0.011879	0.0456301	0.0130162	0.0174398	0.0418503	0.0393659	0.0257018	0.0703983		0.00813196	-2.34e-05	-5.49e-05	0.00096273	0.00341519	-5.93e-06	-8.08e-05	0.00799769
		0.363		0.0361895	0.0545826	0.0439034	0.0582072	0.0682325	0.0721569	0.0550145	0.0453504		0.0118778	0.0457442	0.0130725	0.0174971	0.0419268	0.0394855	0.0257591	0.0706212		0.00813112	-2.46e-05	-5.66e-05	0.000997909	0.00344216	-6.57e-06	-8.26e-05	0.00799581
		0.3635		0.0362491	0.0546259	0.0439484	0.0582472	0.0682303	0.0722726	0.0551086	0.0454645		0.0118766	0.0458549	0.0131304	0.0175539	0.0420021	0.0396039	0.0258158	0.0708445		0.0081302	-2.58e-05	-5.84e-05	0.00103368	0.00346849	-7.24e-06	-8.45e-05	0.00799396
		0.364		0.0363097	0.0546684	0.0439933	0.0582868	0.0682282	0.0723862	0.0552015	0.045579		0.0118754	0.0459622	0.0131897	0.0176102	0.0420764	0.0397213	0.0258722	0.0710682		0.00812919	-2.7e-05	-6.01e-05	0.00107003	0.0034942	-7.93e-06	-8.64e-05	0.00799216
		0.3645		0.0363714	0.0547102	0.0440381	0.0583263	0.0682262	0.0724977	0.0552935	0.0456937		0.0118744	0.0460661	0.0132505	0.017666	0.0421495	0.0398375	0.025928	0.0712924		0.00812811	-2.82e-05	-6.19e-05	0.00110695	0.00351927	-8.64e-06	-8.83e-05	0.00799042
		0.365		0.0364342	0.0547513	0.044083	0.0583654	0.0682245	0.0726073	0.0553843	0.0458088		0.0118734	0.0461666	0.0133128	0.0177213	0.0422215	0.0399526	0.0259833	0.0715169		0.00812695	-2.95e-05	-6.37e-05	0.00114444	0.00354372	-9.37e-06	-9.01e-05	0.00798877
		0.3655		0.0364983	0.0547918	0.0441278	0.0584041	0.068223	0.0727148	0.0554741	0.045924		0.0118724	0.0462639	0.0133766	0.0177759	0.0422924	0.0400666	0.0260382	0.0717418		0.00812572	-3.07e-05	-6.55e-05	0.00118247	0.00356755	-1.01e-05	-9.2e-05	0.00798722
		0.366		0.0365635	0.0548316	0.0441726	0.0584425	0.0682217	0.0728204	0.055563	0.0460394		0.0118715	0.0463579	0.0134419	0.0178299	0.0423622	0.0401795	0.0260925	0.0719669		0.00812442	-3.21e-05	-6.74e-05	0.00122103	0.00359076	-1.09e-05	-9.39e-05	0.00798581
		0.3665		0.03663	0.0548707	0.0442173	0.0584806	0.0682208	0.072924	0.0556508	0.0461549		0.0118707	0.0464486	0.0135087	0.0178833	0.0424309	0.0402913	0.0261464	0.0721923		0.00812306	-3.34e-05	-6.92e-05	0.00126012	0.00361336	-1.17e-05	-9.57e-05	0.00798455
		0.367		0.0366979	0.0549093	0.0442621	0.0585182	0.0682201	0.0730256	0.0557377	0.0462705		0.01187	0.0465362	0.0135771	0.0179361	0.0424985	0.040402	0.0261997	0.072418		0.00812164	-3.48e-05	-7.11e-05	0.00129971	0.00363534	-1.26e-05	-9.75e-05	0.00798346
		0.3675		0.0367672	0.0549473	0.0443068	0.0585553	0.0682199	0.0731253	0.0558236	0.0463861		0.0118694	0.0466207	0.0136469	0.0179881	0.042565	0.0405116	0.0262525	0.0726438		0.00812017	-3.62e-05	-7.29e-05	0.00133978	0.00365673	-1.34e-05	-9.93e-05	0.00798257
		0.368		0.0368379	0.0549848	0.0443516	0.058592	0.06822	0.0732231	0.0559086	0.0465016		0.0118688	0.046702	0.0137182	0.0180395	0.0426304	0.0406201	0.0263048	0.0728698		0.00811864	-3.76e-05	-7.48e-05	0.00138033	0.00367752	-1.43e-05	-0.000101145	0.00798188
		0.3685		0.03691	0.0550217	0.0443964	0.0586282	0.0682206	0.073319	0.0559926	0.046617		0.0118683	0.0467804	0.0137911	0.0180901	0.0426948	0.0407275	0.0263565	0.0730959		0.00811707	-3.9e-05	-7.67e-05	0.00142132	0.00369771	-1.52e-05	-0.000102923	0.00798144
		0.369		0.0369838	0.0550581	0.0444412	0.0586639	0.0682216	0.073413	0.0560758	0.0467322		0.011868	0.0468557	0.0138654	0.01814	0.0427581	0.0408339	0.0264078	0.073322		0.00811545	-4.05e-05	-7.86e-05	0.00146274	0.00371732	-1.61e-05	-0.000104677	0.00798125
		0.3695		0.037059	0.0550941	0.0444861	0.0586991	0.068223	0.0735051	0.0561581	0.0468471		0.0118677	0.0469281	0.0139412	0.0181892	0.0428204	0.0409391	0.0264585	0.0735483		0.00811378	-4.2e-05	-8.05e-05	0.00150457	0.00373635	-1.71e-05	-0.000106406	0.00798134
		0.37		0.0371359	0.0551297	0.0445309	0.0587337	0.068225	0.0735953	0.0562396	0.0469618		0.0118676	0.0469977	0.0140185	0.0182377	0.0428817	0.0410433	0.0265087	0.0737745		0.00811208	-4.35e-05	-8.24e-05	0.00154678	0.0037548	-1.81e-05	-0.000108105	0.00798173
		0.3705		0.0372145	0.0551648	0.0445758	0.0587678	0.0682276	0.0736837	0.0563203	0.047076		0.0118675	0.0470643	0.0140973	0.0182854	0.0429419	0.0411464	0.0265585	0.0740007		0.00811033	-4.51e-05	-8.44e-05	0.00158934	0.0037727	-1.91e-05	-0.000109773	0.00798244
		0.371		0.0372948	0.0551996	0.0446208	0.0588013	0.0682307	0.0737702	0.0564001	0.0471899		0.0118676	0.0471283	0.0141775	0.0183324	0.0430011	0.0412484	0.0266077	0.0742268		0.00810856	-4.67e-05	-8.63e-05	0.00163224	0.00379003	-2.01e-05	-0.000111406	0.00798349
		0.3715		0.0373769	0.055234	0.0446658	0.0588342	0.0682344	0.0738549	0.0564792	0.0473032		0.0118678	0.0471895	0.0142591	0.0183786	0.0430594	0.0413493	0.0266565	0.0744527		0.00810675	-4.83e-05	-8.82e-05	0.00167543	0.00380681	-2.12e-05	-0.000113	0.00798491
		0.372		0.0374607	0.0552682	0.0447109	0.0588666	0.0682387	0.0739377	0.0565576	0.047416		0.0118682	0.047248	0.0143422	0.018424	0.0431167	0.0414491	0.0267048	0.0746785		0.00810491	-4.99e-05	-9.01e-05	0.0017189	0.00382305	-2.23e-05	-0.000114553	0.00798671
		0.3725		0.0375464	0.055302	0.044756	0.0588983	0.0682438	0.0740186	0.0566351	0.0475282		0.0118686	0.0473039	0.0144267	0.0184687	0.0431731	0.0415479	0.0267527	0.0749041		0.00810304	-5.16e-05	-9.2e-05	0.0017626	0.00383876	-2.34e-05	-0.000116061	0.00798892
		0.373		0.0376339	0.0553357	0.0448012	0.0589294	0.0682495	0.0740977	0.056712	0.0476398		0.0118692	0.0473573	0.0145126	0.0185126	0.0432285	0.0416456	0.0268001	0.0751294		0.00810115	-5.32e-05	-9.39e-05	0.00180652	0.00385394	-2.46e-05	-0.00011752	0.00799155
		0.3735		0.0377234	0.0553691	0.0448464	0.0589598	0.0682559	0.074175	0.0567882	0.0477506		0.01187	0.0474081	0.0145998	0.0185558	0.0432831	0.0417422	0.0268472	0.0753544		0.00809923	-5.49e-05	-9.58e-05	0.0018506	0.0038686	-2.58e-05	-0.000118927	0.00799464
		0.374		0.0378148	0.0554024	0.0448917	0.0589896	0.068263	0.0742505	0.0568637	0.0478606		0.0118709	0.0474565	0.0146883	0.0185983	0.0433368	0.0418379	0.0268938	0.075579		0.0080973	-5.66e-05	-9.77e-05	0.00189482	0.00388275	-2.7e-05	-0.000120278	0.00799819
		0.3745		0.0379082	0.0554356	0.0449371	0.0590188	0.068271	0.0743241	0.0569385	0.0479698		0.011872	0.0475026	0.0147782	0.0186399	0.0433896	0.0419325	0.02694	0.0758031		0.00809534	-5.84e-05	-9.96e-05	0.00193914	0.00389639	-2.82e-05	-0.000121568	0.00800224
		0.375		0.0380036	0.0554686	0.0449825	0.0590473	0.0682797	0.0743959	0.0570126	0.0480782		0.0118732	0.0475463	0.0148693	0.0186809	0.0434416	0.0420261	0.0269859	0.0760268		0.00809337	-6.01e-05	-0.000101472	0.00198351	0.00390955	-2.95e-05	-0.000122795	0.0080068
		0.3755		0.0381011	0.0555016	0.045028	0.0590751	0.0682893	0.0744659	0.0570862	0.0481856		0.0118746	0.0475878	0.0149616	0.0187211	0.0434928	0.0421187	0.0270314	0.0762499		0.00809138	-6.19e-05	-0.000103316	0.0020279	0.00392222	-3.07e-05	-0.000123954	0.00801189
		0.376		0.0382006	0.0555347	0.0450735	0.0591023	0.0682997	0.0745341	0.0571591	0.0482919		0.0118762	0.047627	0.0150552	0.0187606	0.0435432	0.0422103	0.0270766	0.0764724		0.00808938	-6.37e-05	-0.000105141	0.00207225	0.00393442	-3.21e-05	-0.000125039	0.00801754
		0.3765		0.0383022	0.0555677	0.0451191	0.0591288	0.0683111	0.0746006	0.0572314	0.0483973		0.0118779	0.0476642	0.0151499	0.0187994	0.0435929	0.0423011	0.0271215	0.0766943		0.00808737	-6.55e-05	-0.000106942	0.00211654	0.00394614	-3.34e-05	-0.000126049	0.00802377
		0.377		0.038406	0.0556008	0.0451647	0.0591547	0.0683233	0.0746653	0.0573031	0.0485015		0.0118799	0.0476992	0.0152458	0.0188374	0.0436419	0.0423909	0.0271661	0.0769155		0.00808534	-6.74e-05	-0.000108717	0.00216072	0.00395741	-3.48e-05	-0.000126976	0.00803059
		0.3775		0.0385118	0.055634	0.0452104	0.0591799	0.0683365	0.0747283	0.0573743	0.0486046		0.0118821	0.0477322	0.0153427	0.0188748	0.0436901	0.0424798	0.0272105	0.077136		0.00808331	-6.92e-05	-0.000110463	0.00220475	0.00396824	-3.62e-05	-0.000127818	0.00803804
		0.378		0.0386199	0.0556674	0.0452561	0.0592044	0.0683506	0.0747895	0.0574448	0.0487064		0.0118844	0.0477633	0.0154407	0.0189116	0.0437377	0.0425679	0.0272546	0.0773557		0.00808126	-7.11e-05	-0.000112176	0.00224859	0.00397862	-3.76e-05	-0.000128569	0.00804613
		0.3785		0.0387301	0.055701	0.0453019	0.0592282	0.0683658	0.0748491	0.0575148	0.0488071		0.011887	0.0477925	0.0155398	0.0189476	0.0437846	0.0426552	0.0272985	0.0775746		0.00807922	-7.29e-05	-0.000113855	0.00229221	0.00398857	-3.9e-05	-0.000129224	0.00805488
		0.379		0.0388425	0.0557348	0.0453476	0.0592514	0.0683819	0.074907	0.0575843	0.0489064		0.0118898	0.0478198	0.0156398	0.0189831	0.0438309	0.0427416	0.0273423	0.0777927		0.00807716	-7.48e-05	-0.000115494	0.00233557	0.0039981	-4.05e-05	-0.000129779	0.00806431
		0.3795		0.0389571	0.0557689	0.0453934	0.0592739	0.0683991	0.0749632	0.0576531	0.0490043		0.0118928	0.0478454	0.0157408	0.0190179	0.0438766	0.0428273	0.0273859	0.0780098		0.0080751	-7.67e-05	-0.000117092	0.00237865	0.00400722	-4.2e-05	-0.000130228	0.00807445
		0.38		0.039074	0.0558033	0.0454392	0.0592957	0.0684174	0.0750179	0.0577215	0.049101		0.0118961	0.0478693	0.0158427	0.0190521	0.0439217	0.0429123	0.0274294	0.0782261		0.00807304	-7.86e-05	-0.000118644	0.00242142	0.00401593	-4.35e-05	-0.000130565	0.00808532
		0.3805		0.039193	0.055838	0.0454849	0.0593168	0.0684367	0.0750709	0.0577893	0.0491962		0.0118996	0.0478915	0.0159455	0.0190857	0.0439663	0.0429966	0.0274727	0.0784415		0.00807097	-8.05e-05	-0.000120147	0.00246383	0.00402426	-4.51e-05	-0.000130787	0.00809693
		0.381		0.0393143	0.0558731	0.0455306	0.0593373	0.0684572	0.0751223	0.0578566	0.0492899		0.0119033	0.0479122	0.0160492	0.0191188	0.0440104	0.0430803	0.0275161	0.0786559		0.0080689	-8.24e-05	-0.000121596	0.00250588	0.00403219	-4.67e-05	-0.000130886	0.00810931
		0.3815		0.0394378	0.0559087	0.0455763	0.0593572	0.0684788	0.0751722	0.0579233	0.0493822		0.0119073	0.0479313	0.0161538	0.0191513	0.044054	0.0431633	0.0275593	0.0788693		0.00806684	-8.44e-05	-0.000122989	0.00254753	0.00403975	-4.83e-05	-0.000130858	0.00812248
		0.382		0.0395635	0.0559448	0.0456219	0.0593763	0.0685016	0.0752206	0.0579894	0.049473		0.0119116	0.047949	0.0162591	0.0191833	0.0440972	0.0432458	0.0276026	0.0790817		0.00806477	-8.63e-05	-0.000124321	0.00258876	0.00404694	-4.99e-05	-0.000130696	0.00813646
		0.3825		0.0396914	0.0559814	0.0456674	0.0593949	0.0685256	0.0752675	0.0580551	0.0495623		0.0119162	0.0479653	0.0163653	0.0192148	0.0441399	0.0433277	0.0276459	0.0792931		0.0080627	-8.82e-05	-0.000125588	0.00262955	0.00405378	-5.16e-05	-0.000130396	0.00815127
		0.383		0.0398216	0.0560186	0.0457128	0.0594128	0.0685508	0.0753129	0.0581201	0.0496501		0.011921	0.0479802	0.0164721	0.0192458	0.0441822	0.0434092	0.0276892	0.0795034		0.00806063	-9.01e-05	-0.000126786	0.00266987	0.00406027	-5.32e-05	-0.00012995	0.00816693
		0.3835		0.0399539	0.0560564	0.045758	0.05943	0.0685772	0.0753569	0.0581846	0.0497363		0.0119261	0.0479939	0.0165797	0.0192764	0.0442242	0.0434901	0.0277327	0.0797127		0.00805857	-9.2e-05	-0.000127911	0.00270971	0.00406641	-5.49e-05	-0.000129352	0.00818347
		0.384		0.0400884	0.0560948	0.0458032	0.0594466	0.0686048	0.0753995	0.0582486	0.0498209		0.0119315	0.0480064	0.016688	0.0193065	0.0442658	0.0435707	0.0277762	0.0799209		0.00805651	-9.39e-05	-0.000128957	0.00274904	0.00407223	-5.66e-05	-0.000128597	0.00820089
		0.3845		0.040225	0.0561339	0.0458481	0.0594626	0.0686337	0.0754408	0.058312	0.049904		0.0119373	0.0480178	0.0167969	0.0193363	0.044307	0.0436509	0.0278199	0.080128		0.00805445	-9.58e-05	-0.000129921	0.00278786	0.00407772	-5.84e-05	-0.000127678	0.00821923
		0.385		0.0403638	0.0561738	0.0458928	0.059478	0.068664	0.0754807	0.0583749	0.0499855		0.0119433	0.048028	0.0169064	0.0193657	0.044348	0.0437308	0.0278638	0.0803339		0.00805239	-9.77e-05	-0.000130797	0.00282614	0.0040829	-6.01e-05	-0.000126588	0.00823849
		0.3855		0.0405046	0.0562144	0.0459373	0.0594928	0.0686955	0.0755193	0.0584372	0.0500653		0.0119497	0.0480373	0.0170165	0.0193947	0.0443887	0.0438104	0.0279078	0.0805388		0.00805033	-9.96e-05	-0.000131581	0.00286387	0.00408777	-6.19e-05	-0.000125321	0.00825871
		0.386		0.0406476	0.0562559	0.0459816	0.059507	0.0687284	0.0755566	0.058499	0.0501436		0.0119564	0.0480456	0.0171272	0.0194234	0.0444292	0.0438897	0.0279521	0.0807424		0.00804828	-0.000101472	-0.000132268	0.00290103	0.00409235	-6.37e-05	-0.000123869	0.0082799
		0.3865		0.0407925	0.0562983	0.0460255	0.0595206	0.0687626	0.0755927	0.0585603	0.0502203		0.0119634	0.0480531	0.0172383	0.0194518	0.0444695	0.0439689	0.0279967	0.0809449		0.00804623	-0.000103316	-0.000132853	0.00293762	0.00409664	-6.55e-05	-0.000122227	0.00830208
		0.387		0.0409394	0.0563415	0.0460691	0.0595336	0.0687982	0.0756276	0.0586211	0.0502953		0.0119708	0.0480597	0.0173499	0.01948	0.0445095	0.0440479	0.0280416	0.0811461		0.00804419	-0.000105141	-0.00013333	0.00297362	0.00410065	-6.74e-05	-0.000120387	0.00832526
		0.3875		0.0410883	0.0563857	0.0461123	0.0595461	0.0688351	0.0756613	0.0586813	0.0503687		0.0119785	0.0480655	0.017462	0.0195079	0.0445494	0.0441267	0.0280869	0.0813461		0.00804215	-0.000106942	-0.000133694	0.00300902	0.00410438	-6.92e-05	-0.000118342	0.00834947
		0.388		0.041239	0.0564309	0.0461552	0.059558	0.0688735	0.0756939	0.0587411	0.0504405		0.0119866	0.0480707	0.0175744	0.0195356	0.0445892	0.0442056	0.0281325	0.0815449		0.00804012	-0.000108717	-0.00013394	0.00304381	0.00410786	-7.11e-05	-0.000116084	0.00837473
		0.3885		0.0413916	0.0564771	0.0461976	0.0595694	0.0689133	0.0757253	0.0588004	0.0505107		0.0119951	0.0480752	0.0176872	0.0195632	0.0446288	0.0442843	0.0281785	0.0817424		0.00803808	-0.000110463	-0.000134062	0.00307799	0.00411108	-7.29e-05	-0.000113607	0.00840105
		0.389		0.0415459	0.0565244	0.0462396	0.0595802	0.0689545	0.0757558	0.0588593	0.0505792		0.012004	0.0480792	0.0178003	0.0195906	0.0446684	0.0443631	0.0282249	0.0819386		0.00803606	-0.000112176	-0.000134054	0.00311154	0.00411405	-7.48e-05	-0.000110902	0.00842845
		0.3895		0.041702	0.0565728	0.0462812	0.0595906	0.0689971	0.0757852	0.0589177	0.0506462		0.0120133	0.0480826	0.0179137	0.0196179	0.0447078	0.044442	0.0282718	0.0821335		0.00803403	-0.000113855	-0.000133911	0.00314445	0.00411678	-7.67e-05	-0.000107963	0.00845695
		0.39		0.0418596	0.0566223	0.0463222	0.0596004	0.0690412	0.0758136	0.0589757	0.0507115		0.0120229	0.0480856	0.0180273	0.0196452	0.0447472	0.0445209	0.0283192	0.082327		0.00803201	-0.000115494	-0.000133625	0.00317674	0.00411929	-7.86e-05	-0.000104781	0.00848656
		0.3905		0.0420189	0.0566731	0.0463628	0.0596097	0.0690868	0.075841	0.0590333	0.0507753		0.012033	0.0480882	0.0181411	0.0196724	0.0447866	0.0446	0.0283671	0.0825191		0.00803	-0.000117092	-0.000133192	0.00320838	0.00412156	-8.05e-05	-0.000101349	0.0085173
		0.391		0.0421796	0.056725	0.0464029	0.0596186	0.0691338	0.0758675	0.0590906	0.0508374		0.0120435	0.0480905	0.018255	0.0196995	0.044826	0.0446793	0.0284156	0.0827098		0.00802799	-0.000118644	-0.000132605	0.00323937	0.00412362	-8.24e-05	-9.77e-05	0.00854919
		0.3915		0.0423418	0.0567783	0.0464424	0.059627	0.0691823	0.0758932	0.0591474	0.050898		0.0120544	0.0480925	0.018369	0.0197267	0.0448654	0.0447588	0.0284647	0.0828991		0.00802598	-0.000120147	-0.000131857	0.00326971	0.00412548	-8.44e-05	-9.37e-05	0.00858224
		0.392		0.0425053	0.0568328	0.0464814	0.0596349	0.0692324	0.075918	0.059204	0.050957		0.0120658	0.0480944	0.0184831	0.019754	0.0449048	0.0448386	0.0285144	0.083087		0.00802397	-0.000121596	-0.000130943	0.0032994	0.00412713	-8.63e-05	-8.95e-05	0.00861647
		0.3925		0.0426701	0.0568886	0.0465199	0.0596424	0.0692839	0.075942	0.0592602	0.0510144		0.0120776	0.0480961	0.0185973	0.0197813	0.0449443	0.0449186	0.0285647	0.0832734		0.00802197	-0.000122989	-0.000129854	0.00332844	0.00412858	-8.82e-05	-8.5e-05	0.00865188
		0.393		0.0428361	0.0569459	0.0465577	0.0596495	0.0693369	0.0759652	0.0593161	0.0510703		0.0120898	0.0480977	0.0187114	0.0198088	0.0449838	0.044999	0.0286158	0.0834583		0.00801997	-0.000124321	-0.000128585	0.00335682	0.00412985	-9.01e-05	-8.02e-05	0.0086885
		0.3935		0.0430032	0.0570045	0.046595	0.0596562	0.0693914	0.0759876	0.0593718	0.0511247		0.0121025	0.0480994	0.0188256	0.0198364	0.0450234	0.0450798	0.0286675	0.0836417		0.00801798	-0.000125588	-0.000127129	0.00338454	0.00413094	-9.2e-05	-7.5e-05	0.00872634
		0.394		0.0431714	0.0570646	0.0466318	0.0596625	0.0694475	0.0760094	0.0594273	0.0511776		0.0121157	0.0481011	0.0189396	0.0198642	0.0450631	0.045161	0.0287199	0.0838236		0.00801598	-0.000126786	-0.000125478	0.00341161	0.00413186	-9.39e-05	-6.96e-05	0.00876541
		0.3945		0.0433405	0.0571261	0.0466679	0.0596684	0.069505	0.0760305	0.0594825	0.0512289		0.0121294	0.0481029	0.0190536	0.0198922	0.045103	0.0452427	0.0287732	0.084004		0.00801399	-0.000127911	-0.000123625	0.00343802	0.00413261	-9.58e-05	-6.39e-05	0.00880572
		0.395		0.0435105	0.0571892	0.0467034	0.059674	0.0695641	0.076051	0.0595375	0.0512788		0.0121435	0.0481048	0.0191675	0.0199205	0.0451429	0.0453248	0.0288272	0.0841829		0.008012	-0.000128957	-0.000121564	0.00346378	0.00413319	-9.77e-05	-5.79e-05	0.00884728
		0.3955		0.0436813	0.0572538	0.0467384	0.0596793	0.0696247	0.0760709	0.0595924	0.0513272		0.0121581	0.0481071	0.0192813	0.019949	0.045183	0.0454075	0.028882	0.0843602		0.00801001	-0.000129921	-0.000119286	0.00348889	0.00413363	-9.96e-05	-5.15e-05	0.0088901
		0.396		0.0438528	0.0573199	0.0467727	0.0596842	0.0696868	0.0760903	0.0596472	0.0513741		0.0121733	0.0481096	0.0193948	0.0199779	0.0452232	0.0454907	0.0289376	0.0845359		0.00800803	-0.000130797	-0.000116784	0.00351334	0.00413391	-0.000101472	-4.47e-05	0.00893419
		0.3965		0.0440249	0.0573876	0.0468065	0.0596888	0.0697505	0.0761091	0.0597018	0.0514196		0.0121889	0.0481125	0.0195083	0.0200072	0.0452636	0.0455745	0.0289942	0.08471		0.00800604	-0.000131581	-0.000114051	0.00353715	0.00413405	-0.000103316	-3.77e-05	0.00897957
		0.397		0.0441974	0.057457	0.0468396	0.0596931	0.0698156	0.0761275	0.0597564	0.0514637		0.0122051	0.0481158	0.0196215	0.0200368	0.0453041	0.0456589	0.0290516	0.0848825		0.00800405	-0.000132268	-0.000111079	0.00356031	0.00413406	-0.000105141	-3.02e-05	0.00902622
		0.3975		0.0443705	0.057528	0.0468721	0.0596972	0.0698822	0.0761454	0.0598109	0.0515064		0.0122218	0.0481195	0.0197344	0.0200669	0.0453448	0.0457439	0.0291099	0.0850533		0.00800206	-0.000132853	-0.000107859	0.00358283	0.00413394	-0.000106942	-2.24e-05	0.00907418
		0.398		0.0445439	0.0576006	0.0469041	0.059701	0.0699503	0.0761629	0.0598654	0.0515478		0.012239	0.0481239	0.0198471	0.0200974	0.0453857	0.0458296	0.0291691	0.0852226		0.00800008	-0.00013333	-0.000104384	0.00360472	0.00413369	-0.000108717	-1.42e-05	0.00912343
		0.3985		0.0447176	0.057675	0.0469354	0.0597046	0.0700199	0.07618	0.0599199	0.0515877		0.0122567	0.0481288	0.0199596	0.0201285	0.0454268	0.045916	0.0292293	0.0853902		0.00799809	-0.000133694	-0.000100646	0.00362597	0.00413333	-0.000110463	-5.67e-06	0.00917398
		0.399		0.0448915	0.057751	0.0469662	0.059708	0.0700909	0.0761968	0.0599744	0.0516264		0.012275	0.0481344	0.0200717	0.02016	0.0454681	0.0460031	0.0292905	0.0855561		0.0079961	-0.00013394	-9.66e-05	0.0036466	0.00413285	-0.000112176	3.29e-06	0.00922584
		0.3995		0.0450655	0.0578288	0.0469964	0.0597111	0.0701634	0.0762134	0.0600291	0.0516637		0.0122939	0.0481408	0.0201835	0.0201922	0.0455095	0.0460909	0.0293527	0.0857204		0.00799411	-0.000134062	-9.23e-05	0.0036666	0.00413227	-0.000113855	1.27e-05	0.00927901
		0.4		0.0452397	0.0579083	0.0470259	0.0597141	0.0702374	0.0762296	0.0600838	0.0516998		0.0123133	0.0481479	0.020295	0.0202249	0.0455512	0.0461795	0.0294158	0.0858829		0.00799212	-0.000134054	-8.78e-05	0.00368599	0.00413158	-0.000115494	2.24e-05	0.00933349
		0.4005		0.0454139	0.0579896	0.047055	0.059717	0.0703127	0.0762456	0.0601386	0.0517345		0.0123333	0.0481559	0.0204061	0.0202583	0.045593	0.0462688	0.02948	0.0860438		0.00799013	-0.000133911	-8.29e-05	0.00370476	0.0041308	-0.000117092	3.26e-05	0.00938927
		0.401		0.045588	0.0580727	0.0470834	0.0597197	0.0703894	0.0762614	0.0601936	0.0517681		0.0123538	0.0481648	0.0205168	0.0202923	0.045635	0.046359	0.0295452	0.0862031		0.00798813	-0.000133625	-7.77e-05	0.00372293	0.00412992	-0.000118644	4.33e-05	0.00944637
		0.4015		0.0457621	0.0581575	0.0471113	0.0597223	0.0704675	0.0762771	0.0602488	0.0518004		0.0123749	0.0481746	0.0206271	0.020327	0.0456772	0.0464499	0.0296115	0.0863606		0.00798613	-0.000133192	-7.22e-05	0.00374051	0.00412896	-0.000120147	5.43e-05	0.00950477
		0.402		0.0459361	0.0582441	0.0471387	0.0597248	0.070547	0.0762927	0.0603042	0.0518315		0.0123966	0.0481855	0.0207369	0.0203625	0.0457196	0.0465416	0.0296788	0.0865165		0.00798413	-0.000132605	-6.64e-05	0.00375749	0.00412791	-0.000121596	6.59e-05	0.00956447
		0.4025		0.0461099	0.0583326	0.0471655	0.0597273	0.0706278	0.0763081	0.0603598	0.0518614		0.0124189	0.0481975	0.0208463	0.0203987	0.0457621	0.0466341	0.0297472	0.0866708		0.00798212	-0.000131857	-6.03e-05	0.00377389	0.00412679	-0.000122989	7.78e-05	0.00962546
		0.403		0.0462834	0.0584228	0.0471918	0.0597297	0.0707098	0.0763235	0.0604157	0.0518902		0.0124417	0.0482107	0.0209552	0.0204357	0.0458048	0.0467275	0.0298166	0.0868234		0.00798011	-0.000130943	-5.38e-05	0.00378971	0.00412559	-0.000124321	9.03e-05	0.00968774
		0.4035		0.0464567	0.0585149	0.0472176	0.059732	0.0707932	0.0763389	0.0604719	0.0519178		0.0124652	0.048225	0.0210636	0.0204736	0.0458477	0.0468216	0.0298871	0.0869743		0.0079781	-0.000129854	-4.69e-05	0.00380496	0.00412432	-0.000125588	0.00010321	0.00975131
		0.404		0.0466297	0.0586088	0.0472429	0.0597344	0.0708778	0.0763544	0.0605284	0.0519444		0.0124892	0.0482406	0.0211715	0.0205123	0.0458907	0.0469166	0.0299588	0.0871236		0.00797608	-0.000128585	-3.98e-05	0.00381965	0.00412299	-0.000126786	0.00011661	0.00981614
		0.4045		0.0468023	0.0587044	0.0472677	0.0597368	0.0709636	0.0763698	0.0605853	0.0519698		0.0125138	0.0482576	0.0212788	0.0205519	0.0459338	0.0470124	0.0300315	0.0872713		0.00797406	-0.000127129	-3.22e-05	0.00383379	0.0041216	-0.000127911	0.000130502	0.00988222
		0.405		0.0469745	0.0588019	0.047292	0.0597392	0.0710506	0.0763853	0.0606425	0.0519942		0.0125391	0.0482759	0.0213856	0.0205925	0.0459771	0.047109	0.0301053	0.0874173		0.00797203	-0.000125478	-2.43e-05	0.00384738	0.00412015	-0.000128957	0.000144893	0.00994955
		0.4055		0.0471462	0.0589012	0.0473159	0.0597417	0.0711389	0.076401	0.0607002	0.0520176		0.0125649	0.0482957	0.0214917	0.020634	0.0460204	0.0472064	0.0301801	0.0875618		0.00797	-0.000123625	-1.59e-05	0.00386044	0.00411864	-0.000129921	0.000159791	0.0100181
		0.406		0.0473175	0.0590023	0.0473394	0.0597442	0.0712283	0.0764168	0.0607583	0.0520399		0.0125913	0.048317	0.0215973	0.0206764	0.0460638	0.0473045	0.0302561	0.0877046		0.00796796	-0.000121564	-7.22e-06	0.00387296	0.00411709	-0.000130797	0.000175205	0.0100879
		0.4065		0.0474883	0.0591052	0.0473624	0.0597469	0.0713189	0.0764328	0.0608168	0.0520613		0.0126184	0.0483398	0.0217024	0.0207199	0.0461073	0.0474035	0.0303331	0.0878459		0.00796591	-0.000119286	1.9e-06	0.00388497	0.00411549	-0.000131581	0.000191143	0.0101588
		0.407		0.0476585	0.0592098	0.0473851	0.0597497	0.0714107	0.076449	0.0608758	0.0520817		0.012646	0.0483643	0.0218068	0.0207645	0.0461508	0.0475032	0.0304112	0.0879856		0.00796387	-0.000116784	1.14e-05	0.00389646	0.00411385	-0.000132268	0.000207611	0.0102309
		0.4075		0.0478281	0.0593162	0.0474074	0.0597526	0.0715036	0.0764654	0.0609353	0.0521011		0.0126743	0.0483904	0.0219106	0.0208101	0.0461943	0.0476037	0.0304904	0.0881238		0.00796181	-0.000114051	2.14e-05	0.00390745	0.00411218	-0.000132853	0.000224619	0.0103042
		0.408		0.0479971	0.0594242	0.0474292	0.0597557	0.0715976	0.0764821	0.0609953	0.0521196		0.0127031	0.0484183	0.0220139	0.0208567	0.0462379	0.0477048	0.0305706	0.0882604		0.00795975	-0.000111079	3.18e-05	0.00391795	0.00411046	-0.00013333	0.000242172	0.0103786
		0.4085		0.0481654	0.059534	0.0474508	0.0597591	0.0716928	0.0764991	0.0610559	0.0521373		0.0127326	0.048448	0.0221165	0.0209046	0.0462816	0.0478066	0.0306518	0.0883955		0.00795769	-0.000107859	4.26e-05	0.00392796	0.00410872	-0.000133694	0.000260278	0.010454
		0.409		0.048333	0.0596455	0.047472	0.0597626	0.0717891	0.0765164	0.061117	0.052154		0.0127626	0.0484795	0.0222186	0.0209535	0.0463252	0.0479091	0.0307341	0.088529		0.00795561	-0.000104384	5.39e-05	0.0039375	0.00410694	-0.00013394	0.000278944	0.0105305
		0.4095		0.0484999	0.0597586	0.047493	0.0597664	0.0718864	0.0765341	0.0611787	0.0521699		0.0127932	0.0485129	0.0223201	0.0210036	0.0463689	0.0480122	0.0308173	0.0886611		0.00795354	-0.000100646	6.56e-05	0.00394656	0.00410514	-0.000134062	0.000298177	0.0106081
		0.41		0.0486659	0.0598733	0.0475136	0.0597705	0.0719848	0.0765522	0.061241	0.052185		0.0128245	0.0485483	0.022421	0.021055	0.0464125	0.0481159	0.0309015	0.0887917		0.00795146	-9.66e-05	7.78e-05	0.00395518	0.00410332	-0.000134054	0.000317982	0.0106866
		0.4105		0.0488312	0.0599896	0.047534	0.0597748	0.0720843	0.0765707	0.0613039	0.0521993		0.0128563	0.0485857	0.0225214	0.0211075	0.0464562	0.0482201	0.0309867	0.0889209		0.00794937	-9.23e-05	9.05e-05	0.00396334	0.00410147	-0.000133911	0.000338366	0.0107661
		0.411		0.0489956	0.0601074	0.0475541	0.0597795	0.0721849	0.0765896	0.0613674	0.0522128		0.0128887	0.0486251	0.0226212	0.0211613	0.0465	0.0483248	0.0310727	0.0890486		0.00794728	-8.78e-05	0.000103605	0.00397106	0.00409961	-0.000133625	0.000359335	0.0108465
		0.4115		0.0491591	0.0602266	0.047574	0.0597846	0.0722865	0.076609	0.0614316	0.0522256		0.0129216	0.0486667	0.0227204	0.0212163	0.0465437	0.0484299	0.0311597	0.0891749		0.00794518	-8.29e-05	0.000117253	0.00397835	0.00409773	-0.000133192	0.000380894	0.0109278
		0.412		0.0493217	0.0603473	0.0475938	0.05979	0.0723891	0.0766289	0.0614965	0.0522376		0.0129552	0.0487105	0.0228192	0.0212726	0.0465875	0.0485354	0.0312475	0.0892999		0.00794308	-7.77e-05	0.000131403	0.00398522	0.00409584	-0.000132605	0.000403047	0.0110099
		0.4125		0.0494833	0.0604694	0.0476133	0.0597958	0.0724928	0.0766493	0.061562	0.0522489		0.0129893	0.0487565	0.0229174	0.0213302	0.0466312	0.0486413	0.0313362	0.0894235		0.00794097	-7.22e-05	0.000146063	0.00399168	0.00409394	-0.000131857	0.000425801	0.0110927
		0.413		0.0496439	0.0605928	0.0476327	0.059802	0.0725974	0.0766703	0.0616282	0.0522595		0.0130239	0.0488047	0.0230152	0.0213891	0.0466751	0.0487475	0.0314256	0.0895459		0.00793887	-6.64e-05	0.000161241	0.00399774	0.00409203	-0.000130943	0.000449158	0.0111763
		0.4135		0.0498034	0.0607175	0.047652	0.0598087	0.0727031	0.0766919	0.0616951	0.0522694		0.0130591	0.0488553	0.0231125	0.0214494	0.046719	0.048854	0.0315157	0.089667		0.00793676	-6.03e-05	0.000176947	0.0040034	0.00409012	-0.000129854	0.000473123	0.0112605
		0.414		0.0499619	0.0608434	0.0476712	0.0598159	0.0728097	0.076714	0.0617627	0.0522787		0.0130948	0.0489083	0.0232093	0.021511	0.0467629	0.0489607	0.0316065	0.0897868		0.00793464	-5.38e-05	0.000193187	0.00400868	0.0040882	-0.000128585	0.000497699	0.0113454
		0.4145		0.0501193	0.0609705	0.0476903	0.0598236	0.0729173	0.0767368	0.061831	0.0522873		0.013131	0.0489637	0.0233057	0.0215739	0.0468069	0.0490675	0.031698	0.0899056		0.00793253	-4.69e-05	0.00020997	0.00401359	0.00408628	-0.000127129	0.00052289	0.0114308
		0.415		0.0502756	0.0610987	0.0477094	0.0598318	0.0730259	0.0767602	0.0619	0.0522954		0.0131678	0.0490216	0.0234017	0.0216382	0.046851	0.0491745	0.03179	0.0900232		0.00793041	-3.98e-05	0.000227303	0.00401813	0.00408436	-0.000125478	0.000548697	0.0115167
		0.4155		0.0504307	0.061228	0.0477285	0.0598405	0.0731353	0.0767842	0.0619697	0.0523028		0.013205	0.049082	0.0234973	0.0217039	0.0468952	0.0492816	0.0318826	0.0901397		0.00792829	-3.22e-05	0.000245195	0.00402232	0.00408244	-0.000123625	0.000575123	0.011603
		0.416		0.0505846	0.0613584	0.0477475	0.0598499	0.0732458	0.076809	0.0620401	0.0523097		0.0132427	0.049145	0.0235925	0.0217709	0.0469395	0.0493887	0.0319756	0.0902552		0.00792617	-2.43e-05	0.000263652	0.00402616	0.00408052	-0.000121564	0.000602169	0.0116896
		0.4165		0.0507374	0.0614897	0.0477666	0.0598598	0.0733571	0.0768345	0.0621112	0.0523161		0.0132808	0.0492106	0.0236874	0.0218393	0.0469839	0.0494957	0.032069	0.0903697		0.00792406	-1.59e-05	0.000282681	0.00402967	0.00407861	-0.000119286	0.000629835	0.0117765
		0.417		0.0508889	0.0616221	0.0477857	0.0598704	0.0734693	0.0768607	0.062183	0.0523219		0.0133194	0.0492789	0.0237819	0.0219092	0.0470285	0.0496027	0.0321627	0.0904834		0.00792194	-7.22e-06	0.00030229	0.00403285	0.00407671	-0.000116784	0.000658123	0.0118636
		0.4175		0.0510393	0.0617554	0.0478049	0.0598817	0.0735823	0.0768876	0.0622556	0.0523272		0.0133584	0.0493499	0.0238761	0.0219804	0.0470732	0.0497096	0.0322567	0.0905961		0.00791983	1.9e-06	0.000322484	0.0040357	0.00407482	-0.000114051	0.000687032	0.0119509
		0.418		0.0511883	0.0618896	0.0478242	0.0598937	0.0736962	0.0769153	0.0623288	0.052332		0.0133979	0.0494236	0.0239701	0.022053	0.0471181	0.0498163	0.032351	0.0907081		0.00791773	1.14e-05	0.000343271	0.00403826	0.00407294	-0.000111079	0.000716561	0.0120382
		0.4185		0.0513361	0.0620247	0.0478437	0.0599064	0.0738109	0.0769438	0.0624027	0.0523363		0.0134377	0.0495001	0.0240637	0.0221271	0.0471632	0.0499228	0.0324454	0.0908193		0.00791562	2.14e-05	0.000364655	0.0040405	0.00407106	-0.000107859	0.000746708	0.0121255
		0.419		0.0514827	0.0621606	0.0478633	0.0599198	0.0739264	0.0769731	0.0624772	0.0523402		0.0134778	0.0495795	0.0241572	0.0222025	0.0472086	0.050029	0.0325398	0.0909299		0.00791353	3.18e-05	0.000386642	0.00404247	0.00406921	-0.000104384	0.000777472	0.0122127
		0.4195		0.0516279	0.0622974	0.0478831	0.059934	0.0740426	0.0770031	0.0625524	0.0523437		0.0135183	0.0496617	0.0242504	0.0222793	0.0472541	0.050135	0.0326343	0.0910398		0.00791144	4.26e-05	0.000409239	0.00404414	0.00406736	-0.000100646	0.000808848	0.0122998
		0.42		0.0517718	0.062435	0.0479031	0.059949	0.0741596	0.077034	0.0626282	0.0523467		0.0135591	0.0497468	0.0243435	0.0223575	0.0473	0.0502406	0.0327289	0.0911492		0.00790936	5.39e-05	0.000432448	0.00404555	0.00406553	-9.66e-05	0.000840833	0.0123867
		0.4205		0.0519144	0.0625734	0.0479234	0.0599649	0.0742773	0.0770658	0.0627047	0.0523493		0.0136002	0.0498349	0.0244363	0.022437	0.0473461	0.0503459	0.0328233	0.0912581		0.0079073	6.56e-05	0.000456276	0.00404669	0.00406372	-9.23e-05	0.000873422	0.0124733
		0.421		0.0520557	0.0627126	0.0479439	0.0599816	0.0743957	0.0770984	0.0627817	0.0523516		0.0136415	0.0499259	0.024529	0.0225179	0.0473925	0.0504508	0.0329177	0.0913665		0.00790524	7.78e-05	0.000480726	0.00404758	0.00406192	-8.78e-05	0.000906611	0.0125595
		0.4215		0.0521956	0.0628526	0.0479647	0.0599992	0.0745147	0.0771319	0.0628593	0.0523535		0.0136831	0.0500199	0.0246216	0.0226002	0.0474393	0.0505553	0.033012	0.0914746		0.0079032	9.05e-05	0.000505801	0.00404822	0.00406014	-8.29e-05	0.000940392	0.0126453
		0.422		0.0523342	0.0629933	0.0479859	0.0600178	0.0746342	0.0771662	0.0629375	0.052355		0.0137248	0.050117	0.0247141	0.0226838	0.0474864	0.0506593	0.0331061	0.0915824		0.00790118	0.000103605	0.000531505	0.00404863	0.00405838	-7.77e-05	0.000974759	0.0127306
		0.4225		0.0524714	0.0631347	0.0480074	0.0600373	0.0747544	0.0772014	0.0630161	0.0523562		0.0137667	0.0502171	0.0248065	0.0227687	0.0475339	0.0507629	0.0332	0.0916899		0.00789917	0.000117253	0.00055784	0.00404881	0.00405664	-7.22e-05	0.0010097	0.0128154
		0.423		0.0526072	0.0632768	0.0480293	0.0600577	0.074875	0.0772375	0.0630953	0.0523571		0.0138087	0.0503203	0.0248989	0.0228549	0.0475818	0.050866	0.0332937	0.0917973		0.00789719	0.000131403	0.000584809	0.00404877	0.00405493	-6.64e-05	0.00104522	0.0128995
		0.4235		0.0527416	0.0634197	0.0480516	0.0600792	0.0749962	0.0772745	0.0631748	0.0523576		0.0138508	0.0504266	0.0249912	0.0229423	0.0476302	0.0509685	0.0333872	0.0919046		0.00789522	0.000146063	0.000612413	0.00404851	0.00405323	-6.03e-05	0.00108129	0.012983
		0.424		0.0528745	0.0635632	0.0480743	0.0601017	0.0751177	0.0773124	0.0632548	0.0523579		0.013893	0.0505361	0.0250834	0.023031	0.047679	0.0510705	0.0334804	0.0920118		0.00789328	0.000161241	0.000640652	0.00404806	0.00405156	-5.38e-05	0.0011179	0.0130658
		0.4245		0.0530061	0.0637074	0.0480975	0.0601252	0.0752397	0.0773512	0.0633352	0.0523579		0.0139351	0.0506486	0.0251757	0.0231209	0.0477283	0.0511719	0.0335733	0.0921191		0.00789137	0.000176947	0.000669528	0.00404742	0.0040499	-4.69e-05	0.00115506	0.0131478
		0.425		0.0531361	0.0638523	0.0481212	0.0601499	0.075362	0.0773909	0.0634158	0.0523577		0.0139772	0.0507644	0.025268	0.0232119	0.0477781	0.0512727	0.0336659	0.0922265		0.00788948	0.000193187	0.00069904	0.00404659	0.00404828	-3.98e-05	0.00119274	0.013229
		0.4255		0.0532647	0.0639978	0.0481454	0.0601756	0.0754846	0.0774316	0.0634968	0.0523572		0.0140193	0.0508833	0.0253602	0.0233041	0.0478285	0.051373	0.0337581	0.092334		0.00788763	0.00020997	0.000729187	0.00404558	0.00404667	-3.22e-05	0.00123092	0.0133093
		0.426		0.0533919	0.064144	0.0481701	0.0602025	0.0756076	0.0774731	0.063578	0.0523565		0.0140613	0.0510054	0.0254526	0.0233974	0.0478794	0.0514725	0.0338501	0.0924418		0.0078858	0.000227303	0.000759968	0.00404441	0.00404509	-2.43e-05	0.0012696	0.0133887
		0.4265		0.0535175	0.0642908	0.0481954	0.0602306	0.0757307	0.0775155	0.0636594	0.0523555		0.0141032	0.0511307	0.0255449	0.0234918	0.047931	0.0515714	0.0339416	0.0925499		0.00788402	0.000245195	0.000791381	0.00404308	0.00404354	-1.59e-05	0.00130875	0.0134673
		0.427		0.0536417	0.0644382	0.0482213	0.0602598	0.0758541	0.0775589	0.063741	0.0523543		0.0141449	0.0512592	0.0256373	0.0235872	0.0479831	0.0516697	0.0340329	0.0926583		0.00788227	0.000263652	0.000823421	0.00404159	0.00404201	-7.22e-06	0.00134836	0.0135448
		0.4275		0.0537643	0.0645863	0.0482479	0.0602903	0.0759776	0.0776032	0.0638228	0.052353		0.0141865	0.0513909	0.0257298	0.0236835	0.048036	0.0517672	0.0341237	0.0927672		0.00788057	0.000282681	0.000856086	0.00403997	0.00404051	1.9e-06	0.00138841	0.0136214
		0.428		0.0538855	0.0647349	0.0482751	0.0603221	0.0761013	0.0776483	0.0639046	0.0523514		0.0142278	0.0515258	0.0258224	0.0237807	0.0480895	0.051864	0.0342142	0.0928765		0.00787891	0.00030229	0.000889371	0.00403821	0.00403903	1.14e-05	0.00142887	0.0136969
		0.4285		0.0540051	0.0648841	0.0483029	0.0603551	0.0762251	0.0776944	0.0639866	0.0523497		0.014269	0.051664	0.0259151	0.0238789	0.0481437	0.0519601	0.0343043	0.0929864		0.0078773	0.000322484	0.000923271	0.00403633	0.00403758	2.14e-05	0.00146973	0.0137713
		0.429		0.0541233	0.0650339	0.0483315	0.0603894	0.0763489	0.0777413	0.0640685	0.0523479		0.0143099	0.0518052	0.0260078	0.0239778	0.0481987	0.0520554	0.034394	0.093097		0.00787574	0.000343271	0.000957779	0.00403433	0.00403616	3.18e-05	0.00151097	0.0138447
		0.4295		0.05424	0.0651843	0.0483608	0.0604251	0.0764728	0.0777891	0.0641505	0.0523459		0.0143506	0.0519497	0.0261006	0.0240775	0.0482544	0.05215	0.0344834	0.0932082		0.00787424	0.000364655	0.000992887	0.00403222	0.00403477	4.26e-05	0.00155255	0.013917
		0.43		0.0543552	0.0653352	0.0483909	0.0604621	0.0765966	0.0778378	0.0642325	0.0523437		0.014391	0.0520973	0.0261935	0.0241779	0.0483109	0.0522438	0.0345723	0.0933201		0.0078728	0.000386642	0.00102859	0.00403001	0.0040334	5.39e-05	0.00159446	0.0139881
		0.4305		0.0544689	0.0654866	0.0484217	0.0605005	0.0767204	0.0778873	0.0643144	0.0523414		0.0144311	0.0522481	0.0262866	0.024279	0.0483683	0.0523367	0.0346609	0.0934329		0.00787141	0.000409239	0.00106488	0.00402771	0.00403205	6.56e-05	0.00163666	0.0140581
		0.431		0.0545812	0.0656386	0.0484534	0.0605403	0.0768442	0.0779376	0.0643962	0.052339		0.014471	0.052402	0.0263796	0.0243807	0.0484265	0.0524289	0.0347492	0.0935465		0.0078701	0.000432448	0.00110173	0.00402533	0.00403074	7.78e-05	0.00167913	0.0141269
		0.4315		0.054692	0.065791	0.0484859	0.0605815	0.0769678	0.0779888	0.0644778	0.0523365		0.0145105	0.052559	0.0264728	0.024483	0.0484856	0.0525202	0.034837	0.0936611		0.00786885	0.000456276	0.00113916	0.00402286	0.00402945	9.05e-05	0.00172183	0.0141946
		0.432		0.0548014	0.065944	0.0485192	0.0606242	0.0770912	0.0780407	0.0645593	0.0523339		0.0145497	0.052719	0.0265661	0.0245858	0.0485456	0.0526106	0.0349245	0.0937766		0.00786767	0.000480726	0.00117713	0.00402033	0.00402819	0.000103605	0.00176473	0.014261
		0.4325		0.0549093	0.0660973	0.0485534	0.0606683	0.0772145	0.0780935	0.0646406	0.0523312		0.0145886	0.0528821	0.0266594	0.0246891	0.0486065	0.0527001	0.0350116	0.0938931		0.00786658	0.000505801	0.00121564	0.00401774	0.00402696	0.000117253	0.0018078	0.0143263
		0.433		0.0550159	0.0662511	0.0485885	0.060714	0.0773375	0.078147	0.0647217	0.0523284		0.0146272	0.0530482	0.0267527	0.0247929	0.0486684	0.0527888	0.0350984	0.0940107		0.00786556	0.000531505	0.00125467	0.0040151	0.00402576	0.000131403	0.001851	0.0143903
		0.4335		0.055121	0.0664053	0.0486245	0.0607612	0.0774602	0.0782012	0.0648024	0.0523256		0.0146654	0.0532172	0.0268461	0.024897	0.0487312	0.0528765	0.0351849	0.0941295		0.00786464	0.00055784	0.00129421	0.00401242	0.00402458	0.000146063	0.0018943	0.0144531
		0.434		0.0552248	0.0665599	0.0486615	0.0608099	0.0775826	0.0782561	0.0648829	0.0523227		0.0147033	0.053389	0.0269395	0.0250014	0.0487951	0.0529632	0.035271	0.0942494		0.0078638	0.000584809	0.00133424	0.00400969	0.00402343	0.000161241	0.00193765	0.0145146
		0.4345		0.0553272	0.0667148	0.0486995	0.0608601	0.0777046	0.0783117	0.064963	0.0523197		0.0147409	0.0535637	0.0270329	0.0251062	0.04886	0.053049	0.0353569	0.0943705		0.00786306	0.000612413	0.00137474	0.00400694	0.00402231	0.000176947	0.00198103	0.0145749
		0.435		0.0554283	0.06687	0.0487384	0.060912	0.0778263	0.078368	0.0650427	0.0523167		0.0147781	0.0537412	0.0271262	0.0252111	0.0489259	0.0531338	0.0354424	0.094493		0.00786242	0.000640652	0.00141569	0.00400417	0.00402121	0.000193187	0.00202439	0.014634
		0.4355		0.055528	0.0670255	0.0487783	0.0609654	0.0779474	0.0784249	0.0651219	0.0523136		0.0148149	0.0539214	0.0272196	0.0253163	0.0489929	0.0532175	0.0355276	0.0946167		0.00786189	0.000669528	0.00145707	0.00400139	0.00402015	0.00020997	0.0020677	0.0146918
		0.436		0.0556265	0.0671812	0.0488193	0.0610205	0.0780681	0.0784825	0.0652008	0.0523105		0.0148514	0.0541043	0.0273128	0.0254217	0.049061	0.0533002	0.0356126	0.0947417		0.00786146	0.00069904	0.00149887	0.00399861	0.0040191	0.000227303	0.00211093	0.0147484
		0.4365		0.0557237	0.0673371	0.0488613	0.0610772	0.0781882	0.0785408	0.0652791	0.0523074		0.0148876	0.0542896	0.0274059	0.0255272	0.0491302	0.0533819	0.0356973	0.0948682		0.00786115	0.000729187	0.00154105	0.00399582	0.00401809	0.000245195	0.00215404	0.0148037
		0.437		0.0558196	0.0674931	0.0489043	0.0611356	0.0783078	0.0785997	0.0653569	0.0523042		0.0149234	0.0544775	0.0274988	0.0256328	0.0492006	0.0534624	0.0357818	0.0949961		0.00786096	0.000759968	0.00158359	0.00399305	0.0040171	0.000263652	0.00219702	0.0148578
		0.4375		0.0559143	0.0676493	0.0489485	0.0611956	0.0784268	0.0786592	0.0654343	0.0523011		0.0149589	0.0546678	0.0275916	0.0257385	0.0492721	0.0535418	0.035866	0.0951254		0.0078609	0.000791381	0.00162646	0.00399031	0.00401614	0.000282681	0.00223984	0.0149106
		0.438		0.0560078	0.0678055	0.0489937	0.0612573	0.0785452	0.0787193	0.065511	0.0522979		0.014994	0.0548603	0.0276841	0.0258442	0.0493448	0.0536201	0.03595	0.0952562		0.00786097	0.000823421	0.00166965	0.00398758	0.00401521	0.00030229	0.00228247	0.0149622
		0.4385		0.0561	0.0679617	0.04904	0.0613207	0.0786629	0.07878	0.0655872	0.0522947		0.0150289	0.055055	0.0277764	0.02595	0.0494186	0.0536972	0.0360338	0.0953886		0.00786118	0.000856086	0.0017131	0.0039849	0.0040143	0.000322484	0.00232489	0.0150125
		0.439		0.0561911	0.0681178	0.0490875	0.0613858	0.0787799	0.0788413	0.0656628	0.0522915		0.0150634	0.0552519	0.0278685	0.0260557	0.0494937	0.0537731	0.0361174	0.0955224		0.00786153	0.000889371	0.00175681	0.00398226	0.00401341	0.000343271	0.00236708	0.0150616
		0.4395		0.0562811	0.0682738	0.0491361	0.0614526	0.0788962	0.0789032	0.0657379	0.0522884		0.0150976	0.0554508	0.0279602	0.0261615	0.0495699	0.0538479	0.0362008	0.0956578		0.00786204	0.000923271	0.00180072	0.00397967	0.00401256	0.000364655	0.00240902	0.0151095
		0.44		0.0563699	0.0684296	0.0491858	0.0615211	0.0790118	0.0789658	0.0658123	0.0522852		0.0151315	0.0556516	0.0280516	0.0262672	0.0496474	0.0539214	0.0362841	0.0957947		0.00786269	0.000957779	0.00184482	0.00397714	0.00401172	0.000386642	0.00245069	0.0151562
		0.4405		0.0564577	0.0685852	0.0492367	0.0615913	0.0791266	0.0790289	0.0658861	0.052282		0.0151651	0.0558543	0.0281426	0.0263729	0.0497261	0.0539938	0.0363672	0.0959333		0.00786351	0.000992887	0.00188905	0.00397467	0.00401092	0.000409239	0.00249207	0.0152016
		0.441		0.0565443	0.0687404	0.0492887	0.0616633	0.0792407	0.0790926	0.0659593	0.0522789		0.0151984	0.0560588	0.0282332	0.0264785	0.0498061	0.0540649	0.0364502	0.0960734		0.0078645	0.00102859	0.00193339	0.00397229	0.00401013	0.000432448	0.00253316	0.0152459
		0.4415		0.0566299	0.0688952	0.049342	0.061737	0.0793539	0.0791569	0.0660319	0.0522758		0.0152314	0.0562649	0.0283234	0.0265841	0.0498873	0.0541348	0.0365331	0.0962151		0.00786566	0.00106488	0.00197779	0.00396999	0.00400937	0.000456276	0.00257394	0.0152889
		0.442		0.0567144	0.0690495	0.0493964	0.0618125	0.0794663	0.0792218	0.0661039	0.0522727		0.0152642	0.0564727	0.0284131	0.0266895	0.0499697	0.0542035	0.0366159	0.0963584		0.00786701	0.00110173	0.00202221	0.00396778	0.00400864	0.000480726	0.00261439	0.0153308
		0.4425		0.0567979	0.0692033	0.049452	0.0618897	0.0795779	0.0792873	0.0661753	0.0522696		0.0152967	0.0566819	0.0285024	0.0267949	0.0500534	0.054271	0.0366986	0.0965032		0.00786854	0.00113916	0.00206661	0.00396567	0.00400793	0.000505801	0.00265451	0.0153715
		0.443		0.0568804	0.0693564	0.0495088	0.0619686	0.0796885	0.0793535	0.066246	0.0522666		0.015329	0.0568926	0.0285911	0.0269001	0.0501384	0.0543372	0.0367812	0.0966497		0.00787027	0.00117713	0.00211095	0.00396367	0.00400724	0.000531505	0.00269429	0.015411
		0.4435		0.0569619	0.0695088	0.0495667	0.0620493	0.0797983	0.0794202	0.0663161	0.0522636		0.0153611	0.0571045	0.0286793	0.0270053	0.0502246	0.0544023	0.0368637	0.0967977		0.0078722	0.00121564	0.00215518	0.00396179	0.00400657	0.00055784	0.00273372	0.0154494
		0.444		0.0570424	0.0696605	0.0496259	0.0621317	0.0799072	0.0794875	0.0663857	0.0522606		0.015393	0.0573178	0.0287669	0.0271103	0.050312	0.0544661	0.0369462	0.0969472		0.00787434	0.00125467	0.00219928	0.00396003	0.00400593	0.000584809	0.00277279	0.0154866
		0.4445		0.057122	0.0698113	0.0496863	0.0622159	0.0800152	0.0795555	0.0664546	0.0522577		0.0154247	0.0575321	0.0288539	0.0272152	0.0504007	0.0545288	0.0370287	0.0970983		0.00787669	0.00129421	0.00224319	0.0039584	0.00400531	0.000612413	0.0028115	0.0155227
		0.445		0.0572006	0.0699613	0.0497479	0.0623017	0.0801222	0.0796241	0.0665229	0.0522548		0.0154562	0.0577476	0.0289402	0.02732	0.0504907	0.0545902	0.037111	0.0972509		0.00787928	0.00133424	0.0022869	0.00395692	0.00400471	0.000640652	0.00284985	0.0155577
		0.4455		0.0572783	0.0701102	0.0498106	0.0623893	0.0802282	0.0796933	0.0665907	0.0522519		0.0154876	0.057964	0.0290259	0.0274246	0.0505818	0.0546504	0.0371934	0.097405		0.00788209	0.00137474	0.00233035	0.00395559	0.00400413	0.000669528	0.00288783	0.0155917
		0.446		0.0573551	0.0702581	0.0498746	0.0624785	0.0803333	0.0797632	0.0666579	0.0522491		0.0155188	0.0581813	0.0291108	0.0275291	0.0506742	0.0547095	0.0372758	0.0975605		0.00788514	0.00141569	0.00237354	0.00395442	0.00400358	0.00069904	0.00292544	0.0156245
		0.4465		0.057431	0.0704049	0.0499397	0.0625695	0.0804373	0.0798337	0.0667246	0.0522463		0.0155499	0.0583993	0.0291949	0.0276335	0.0507678	0.0547674	0.0373581	0.0977175		0.00788844	0.00145707	0.00241641	0.00395341	0.00400304	0.000729187	0.00296268	0.0156563
		0.447		0.057506	0.0705505	0.050006	0.062662	0.0805404	0.0799049	0.0667907	0.0522436		0.0155809	0.058618	0.0292783	0.0277377	0.0508625	0.0548241	0.0374404	0.0978759		0.007892	0.00149887	0.00245895	0.00395258	0.00400253	0.000759968	0.00299955	0.015687
		0.4475		0.05758	0.0706949	0.0500735	0.0627563	0.0806423	0.0799767	0.0668563	0.0522409		0.0156118	0.0588373	0.0293608	0.0278418	0.0509584	0.0548797	0.0375227	0.0980358		0.00789581	0.00154105	0.00250113	0.00395194	0.00400203	0.000791381	0.00303606	0.0157167
		0.448		0.0576532	0.0708381	0.0501421	0.0628521	0.0807432	0.0800492	0.0669214	0.0522383		0.0156427	0.0590571	0.0294425	0.0279457	0.0510555	0.0549342	0.037605	0.098197		0.0078999	0.00158359	0.00254293	0.00395149	0.00400156	0.000823421	0.00307219	0.0157454
		0.4485		0.0577256	0.0709799	0.0502119	0.0629496	0.080843	0.0801223	0.066986	0.0522357		0.0156735	0.0592773	0.0295233	0.0280495	0.0511537	0.0549875	0.0376873	0.0983595		0.00790427	0.00162646	0.00258431	0.00395123	0.0040011	0.000856086	0.00310797	0.015773
		0.449		0.057797	0.0711203	0.0502827	0.0630486	0.0809417	0.0801962	0.0670501	0.0522332		0.0157042	0.0594977	0.0296031	0.0281531	0.0512529	0.0550398	0.0377695	0.0985234		0.00790893	0.00166965	0.00262526	0.00395119	0.00400066	0.000889371	0.0031434	0.0157997
		0.4495		0.0578676	0.0712592	0.0503547	0.0631491	0.0810392	0.0802707	0.0671138	0.0522307		0.015735	0.0597184	0.0296819	0.0282566	0.0513532	0.055091	0.0378518	0.0986885		0.00791388	0.0017131	0.00266576	0.00395137	0.00400024	0.000923271	0.00317847	0.0158254
		0.45		0.0579373	0.0713967	0.0504277	0.0632511	0.0811356	0.0803459	0.067177	0.0522282		0.0157658	0.0599391	0.0297596	0.02836	0.0514545	0.0551411	0.037934	0.0988549		0.00791914	0.00175681	0.00270579	0.00395178	0.00399984	0.000957779	0.00321319	0.0158502
		0.4505		0.0580062	0.0715326	0.0505018	0.0633546	0.0812308	0.0804219	0.0672399	0.0522258		0.0157966	0.0601598	0.0298364	0.0284631	0.0515568	0.0551902	0.0380162	0.0990225		0.00792471	0.00180072	0.00274533	0.00395242	0.00399946	0.000992887	0.00324757	0.0158741
		0.451		0.0580741	0.0716669	0.0505769	0.0634595	0.0813248	0.0804985	0.0673024	0.0522234		0.0158275	0.0603804	0.029912	0.0285662	0.0516601	0.0552383	0.0380984	0.0991913		0.00793061	0.00184482	0.00278436	0.00395331	0.00399909	0.00102859	0.00328163	0.015897
		0.4515		0.0581412	0.0717995	0.0506531	0.0635658	0.0814175	0.0805759	0.0673645	0.0522211		0.0158585	0.0606008	0.0299866	0.028669	0.0517642	0.0552854	0.0381806	0.0993613		0.00793683	0.00188905	0.00282287	0.00395445	0.00399874	0.00106488	0.00331536	0.015919
		0.452		0.0582075	0.0719305	0.0507302	0.0636734	0.081509	0.0806539	0.0674263	0.0522188		0.0158895	0.0608209	0.03006	0.0287717	0.0518692	0.0553315	0.0382626	0.0995325		0.00794339	0.00193339	0.00286084	0.00395586	0.00399841	0.00110173	0.00334878	0.0159402
		0.4525		0.0582728	0.0720597	0.0508082	0.0637823	0.0815991	0.0807327	0.0674878	0.0522165		0.0159207	0.0610406	0.0301322	0.0288743	0.0519749	0.0553767	0.0383447	0.0997048		0.0079503	0.00197779	0.00289827	0.00395753	0.00399809	0.00113916	0.0033819	0.0159605
		0.453		0.0583372	0.0721871	0.0508871	0.0638924	0.081688	0.0808123	0.067549	0.0522143		0.015952	0.0612598	0.0302032	0.0289767	0.0520814	0.0554209	0.0384266	0.0998782		0.00795757	0.00202221	0.00293512	0.0039595	0.00399779	0.00117713	0.00341472	0.0159799
		0.4535		0.0584007	0.0723126	0.0509669	0.0640037	0.0817755	0.0808925	0.06761	0.0522121		0.0159835	0.0614784	0.0302731	0.0290789	0.0521886	0.0554643	0.0385084	0.100053		0.00796521	0.00206661	0.00297141	0.00396175	0.0039975	0.00121564	0.00344726	0.0159985
		0.454		0.0584634	0.0724363	0.0510476	0.0641161	0.0818616	0.0809735	0.0676707	0.0522099		0.0160152	0.0616964	0.0303417	0.0291809	0.0522964	0.0555067	0.0385901	0.100228		0.00797322	0.00211095	0.00300711	0.00396429	0.00399723	0.00125467	0.00347952	0.0160163
		0.4545		0.0585251	0.072558	0.051129	0.0642295	0.0819463	0.0810553	0.0677312	0.0522078		0.016047	0.0619135	0.0304091	0.0292827	0.0524047	0.0555484	0.0386717	0.100405		0.00798161	0.00215518	0.00304222	0.00396715	0.00399698	0.00129421	0.00351153	0.0160334
		0.455		0.058586	0.0726778	0.0512111	0.0643439	0.0820297	0.0811377	0.0677915	0.0522057		0.0160791	0.0621298	0.0304753	0.0293844	0.0525135	0.0555892	0.038753	0.100582		0.0079904	0.00219928	0.00307673	0.00397033	0.00399673	0.00133424	0.0035433	0.0160496
		0.4555		0.058646	0.0727956	0.0512939	0.0644592	0.0821117	0.0812209	0.0678517	0.0522036		0.0161115	0.062345	0.0305401	0.0294858	0.0526227	0.0556292	0.0388343	0.100761		0.00799959	0.00224319	0.00311063	0.00397384	0.0039965	0.00137474	0.00357483	0.0160651
		0.456		0.058705	0.0729114	0.0513774	0.0645753	0.0821922	0.0813049	0.0679118	0.0522015		0.0161441	0.0625592	0.0306037	0.029587	0.0527322	0.0556684	0.0389153	0.10094		0.00800919	0.0022869	0.00314391	0.00397768	0.00399629	0.00141569	0.00360614	0.0160799
		0.4565		0.0587633	0.0730252	0.0514614	0.0646922	0.0822713	0.0813896	0.0679718	0.0521995		0.016177	0.0627722	0.030666	0.029688	0.0528419	0.0557069	0.0389961	0.101121		0.00801921	0.00233035	0.00317658	0.00398187	0.00399608	0.00145707	0.00363724	0.0160939
		0.457		0.0588206	0.0731369	0.0515459	0.0648096	0.0823489	0.081475	0.0680317	0.0521974		0.0162102	0.0629838	0.0307271	0.0297887	0.0529519	0.0557447	0.0390766	0.101302		0.00802967	0.00237354	0.00320862	0.00398641	0.00399589	0.00149887	0.00366816	0.0161073
		0.4575		0.0588771	0.0732465	0.0516309	0.0649277	0.0824252	0.0815611	0.0680916	0.0521954		0.0162438	0.0631941	0.0307868	0.0298892	0.053062	0.0557818	0.039157	0.101485		0.00804055	0.00241641	0.00324003	0.00399131	0.00399572	0.00154105	0.0036989	0.0161199
		0.458		0.0589327	0.0733541	0.0517162	0.0650463	0.0824999	0.081648	0.0681515	0.0521934		0.0162777	0.0634029	0.0308452	0.0299893	0.0531721	0.0558182	0.0392371	0.101668		0.00805189	0.00245895	0.00327081	0.0039966	0.00399555	0.00158359	0.00372947	0.0161319
		0.4585		0.0589875	0.0734596	0.0518019	0.0651652	0.0825732	0.0817356	0.0682114	0.0521913		0.016312	0.0636102	0.0309023	0.0300892	0.0532822	0.055854	0.0393169	0.101852		0.00806369	0.00250113	0.00330096	0.00400226	0.00399539	0.00162646	0.0037599	0.0161432
		0.459		0.0590415	0.073563	0.0518878	0.0652845	0.0826451	0.0818238	0.0682713	0.0521893		0.0163467	0.0638158	0.030958	0.0301888	0.0533922	0.0558892	0.0393964	0.102036		0.00807595	0.00254293	0.00333047	0.00400832	0.00399525	0.00166965	0.0037902	0.016154
		0.4595		0.0590947	0.0736642	0.0519739	0.065404	0.0827155	0.0819128	0.0683313	0.0521873		0.0163818	0.0640197	0.0310125	0.030288	0.0535022	0.0559238	0.0394757	0.102222		0.00808868	0.00258431	0.00335935	0.00401478	0.00399512	0.0017131	0.00382039	0.0161641
		0.46		0.0591471	0.0737634	0.05206	0.0655236	0.0827845	0.0820025	0.0683914	0.0521852		0.0164173	0.0642218	0.0310656	0.0303869	0.0536119	0.0559578	0.0395547	0.102408		0.0081019	0.00262526	0.00338759	0.00402165	0.003995	0.00175681	0.00385048	0.0161736
		0.4605		0.0591987	0.0738605	0.0521462	0.0656433	0.082852	0.0820928	0.0684517	0.0521832		0.0164533	0.0644221	0.0311174	0.0304853	0.0537214	0.0559914	0.0396334	0.102595		0.00811561	0.00266576	0.00341519	0.00402894	0.00399488	0.00180072	0.00388048	0.0161825
		0.461		0.0592495	0.0739554	0.0522322	0.0657631	0.0829181	0.0821837	0.0685121	0.0521811		0.0164897	0.0646204	0.0311678	0.0305834	0.0538306	0.0560245	0.0397118	0.102783		0.00812982	0.00270579	0.00344216	0.00403666	0.00399478	0.00184482	0.00391042	0.0161908
		0.4615		0.0592996	0.0740482	0.0523181	0.0658827	0.0829827	0.0822753	0.0685726	0.052179		0.0165267	0.0648167	0.031217	0.0306809	0.0539395	0.0560571	0.0397898	0.102971		0.00814454	0.00274533	0.00346849	0.00404483	0.00399469	0.00188905	0.00394031	0.0161986
		0.462		0.059349	0.074139	0.0524037	0.0660022	0.0830459	0.0823675	0.0686334	0.0521768		0.0165642	0.065011	0.0312648	0.030778	0.0540481	0.0560892	0.0398676	0.10316		0.00815978	0.00278436	0.0034942	0.00405344	0.00399461	0.00193339	0.00397016	0.0162059
		0.4625		0.0593977	0.0742276	0.0524889	0.0661215	0.0831077	0.0824603	0.0686944	0.0521746		0.0166022	0.0652032	0.0313113	0.0308746	0.0541562	0.056121	0.039945	0.103349		0.00817554	0.00282287	0.00351927	0.0040625	0.00399453	0.00197779	0.004	0.0162127
		0.463		0.0594456	0.0743141	0.0525737	0.0662405	0.083168	0.0825536	0.0687557	0.0521724		0.0166407	0.0653933	0.0313565	0.0309706	0.0542638	0.0561524	0.040022	0.103539		0.00819183	0.00286084	0.00354372	0.00407204	0.00399446	0.00202221	0.00402984	0.016219
		0.4635		0.0594929	0.0743986	0.052658	0.0663591	0.083227	0.0826475	0.0688172	0.0521701		0.0166798	0.0655811	0.0314003	0.031066	0.054371	0.0561834	0.0400987	0.103729		0.00820867	0.00289827	0.00356755	0.00408205	0.00399441	0.00206661	0.00405969	0.0162247
		0.464		0.0595396	0.074481	0.0527417	0.0664774	0.0832845	0.0827418	0.0688791	0.0521678		0.0167195	0.0657667	0.0314429	0.0311608	0.0544776	0.0562142	0.0401751	0.10392		0.00822606	0.00293512	0.00359076	0.00409255	0.00399436	0.00211095	0.00408958	0.01623
		0.4645		0.0595856	0.0745613	0.0528247	0.0665951	0.0833406	0.0828366	0.0689412	0.0521654		0.0167597	0.06595	0.0314841	0.0312549	0.0545837	0.0562446	0.0402511	0.104111		0.008244	0.00297141	0.00361336	0.00410354	0.00399431	0.00215518	0.00411952	0.0162349
		0.465		0.059631	0.0746396	0.052907	0.0667123	0.0833954	0.0829319	0.0690038	0.0521629		0.0168006	0.066131	0.0315241	0.0313484	0.0546892	0.0562748	0.0403268	0.104302		0.00826251	0.00300711	0.00363534	0.00411503	0.00399428	0.00219928	0.00414952	0.0162393
		0.4655		0.0596758	0.0747159	0.0529885	0.066829	0.0834488	0.0830275	0.0690666	0.0521604		0.0168421	0.0663095	0.0315627	0.0314411	0.054794	0.0563047	0.040402	0.104493		0.00828159	0.00304222	0.00365673	0.00412704	0.00399425	0.00224319	0.00417961	0.0162433
		0.466		0.0597201	0.0747902	0.0530691	0.0669449	0.0835008	0.0831235	0.0691299	0.0521577		0.0168842	0.0664857	0.0316001	0.0315331	0.0548982	0.0563344	0.0404769	0.104685		0.00830125	0.00307673	0.00367752	0.00413956	0.00399423	0.0022869	0.0042098	0.0162469
		0.4665		0.0597638	0.0748625	0.0531488	0.0670602	0.0835515	0.0832198	0.0691936	0.052155		0.016927	0.0666594	0.0316361	0.0316244	0.0550017	0.056364	0.0405514	0.104876		0.00832149	0.00311063	0.00369771	0.00415262	0.00399421	0.00233035	0.0042401	0.0162501
		0.467		0.059807	0.0749328	0.0532275	0.0671747	0.0836009	0.0833164	0.0692577	0.0521522		0.0169704	0.0668306	0.0316709	0.0317148	0.0551044	0.0563934	0.0406255	0.105068		0.00834233	0.00314391	0.00371732	0.00416621	0.00399421	0.00237354	0.00427053	0.0162529
		0.4675		0.0598497	0.0750012	0.0533052	0.0672883	0.083649	0.0834132	0.0693222	0.0521493		0.0170145	0.0669993	0.0317045	0.0318045	0.0552064	0.0564227	0.0406992	0.105259		0.00836376	0.00317658	0.00373635	0.00418035	0.0039942	0.00241641	0.0043011	0.0162554
		0.468		0.0598919	0.0750677	0.0533818	0.0674011	0.0836957	0.0835101	0.0693872	0.0521463		0.0170593	0.0671655	0.0317368	0.0318933	0.0553076	0.0564519	0.0407725	0.10545		0.00838579	0.00320862	0.0037548	0.00419504	0.00399421	0.00245895	0.00433184	0.0162575
		0.4685		0.0599337	0.0751322	0.0534573	0.067513	0.0837412	0.0836071	0.0694526	0.0521431		0.0171047	0.067329	0.0317678	0.0319812	0.055408	0.056481	0.0408453	0.10564		0.00840843	0.00324003	0.0037727	0.00421029	0.00399421	0.00250113	0.00436276	0.0162592
		0.469		0.0599751	0.0751949	0.0535316	0.0676239	0.0837854	0.0837042	0.0695185	0.0521398		0.0171509	0.0674899	0.0317976	0.0320683	0.0555076	0.05651	0.0409177	0.10583		0.00843168	0.00327081	0.00379003	0.00422611	0.00399423	0.00254293	0.00439386	0.0162607
		0.4695		0.060016	0.0752557	0.0536046	0.0677337	0.0838283	0.0838012	0.0695849	0.0521364		0.0171977	0.0676482	0.0318261	0.0321544	0.0556063	0.056539	0.0409897	0.10602		0.00845555	0.00330096	0.00380681	0.00424251	0.00399425	0.00258431	0.00442517	0.0162618
		0.47		0.0600566	0.0753147	0.0536764	0.0678425	0.08387	0.0838982	0.0696518	0.0521329		0.0172453	0.0678038	0.0318535	0.0322396	0.0557042	0.0565681	0.0410611	0.106209		0.00848004	0.00333047	0.00382305	0.00425949	0.00399427	0.00262526	0.0044567	0.0162626
		0.4705		0.0600968	0.0753719	0.0537469	0.0679501	0.0839104	0.083995	0.0697192	0.0521292		0.0172935	0.0679567	0.0318796	0.0323238	0.0558011	0.0565971	0.0411321	0.106397		0.00850515	0.00335935	0.00383876	0.00427707	0.0039943	0.00266576	0.00448847	0.0162631
		0.471		0.0601366	0.0754274	0.053816	0.0680565	0.0839497	0.0840915	0.0697871	0.0521253		0.0173425	0.0681068	0.0319045	0.0324071	0.0558971	0.0566262	0.0412026	0.106585		0.0085309	0.00338759	0.00385394	0.00429524	0.00399433	0.00270579	0.00452048	0.0162634
		0.4715		0.0601762	0.0754811	0.0538837	0.0681617	0.0839877	0.0841878	0.0698555	0.0521213		0.0173921	0.0682542	0.0319282	0.0324893	0.0559921	0.0566554	0.0412726	0.106771		0.00855727	0.00341519	0.0038686	0.00431401	0.00399437	0.00274533	0.00455275	0.0162633
		0.472		0.0602155	0.0755331	0.0539501	0.0682656	0.0840246	0.0842837	0.0699245	0.0521171		0.0174425	0.0683988	0.0319507	0.0325705	0.0560862	0.0566846	0.0413421	0.106957		0.00858427	0.00344216	0.00388275	0.0043334	0.00399441	0.00278436	0.00458528	0.0162631
		0.4725		0.0602545	0.0755833	0.054015	0.0683681	0.0840603	0.0843792	0.0699939	0.0521127		0.0174936	0.0685405	0.031972	0.0326506	0.0561792	0.056714	0.041411	0.107141		0.00861191	0.00346849	0.00389639	0.0043534	0.00399445	0.00282287	0.0046181	0.0162626
		0.473		0.0602932	0.075632	0.0540784	0.0684692	0.0840948	0.0844742	0.0700639	0.0521082		0.0175454	0.0686795	0.0319922	0.0327296	0.0562713	0.0567435	0.0414793	0.107324		0.00864018	0.0034942	0.00390955	0.00437403	0.0039945	0.00286084	0.00465122	0.0162618
		0.4735		0.0603318	0.075679	0.0541403	0.0685689	0.0841282	0.0845686	0.0701344	0.0521034		0.0175979	0.0688156	0.0320112	0.0328074	0.0563622	0.0567732	0.0415471	0.107505		0.00866909	0.00351927	0.00392222	0.00439528	0.00399455	0.00289827	0.00468464	0.0162608
		0.474		0.0603701	0.0757244	0.0542007	0.0686671	0.0841605	0.0846624	0.0702054	0.0520984		0.0176511	0.0689489	0.0320291	0.0328841	0.0564521	0.056803	0.0416142	0.107685		0.00869864	0.00354372	0.00393442	0.00441717	0.0039946	0.00293512	0.00471837	0.0162597
		0.4745		0.0604082	0.0757682	0.0542595	0.0687637	0.0841917	0.0847555	0.0702769	0.0520932		0.0177049	0.0690793	0.0320458	0.0329597	0.0565409	0.056833	0.0416807	0.107864		0.00872881	0.00356755	0.00394614	0.00443969	0.00399466	0.00297141	0.00475243	0.0162583
		0.475		0.0604463	0.0758105	0.0543168	0.0688587	0.0842218	0.0848479	0.0703489	0.0520878		0.0177595	0.0692069	0.0320614	0.033034	0.0566286	0.0568632	0.0417466	0.10804		0.00875963	0.00359076	0.00395741	0.00446285	0.00399472	0.00300711	0.00478681	0.0162567
		0.4755		0.0604841	0.0758513	0.0543725	0.0689521	0.0842508	0.0849394	0.0704214	0.0520822		0.0178147	0.0693316	0.0320759	0.033107	0.0567151	0.0568937	0.0418117	0.108215		0.00879107	0.00361336	0.00396824	0.00448666	0.00399478	0.00304222	0.00482154	0.016255
		0.476		0.0605219	0.0758906	0.0544265	0.0690437	0.0842788	0.0850301	0.0704944	0.0520762		0.0178706	0.0694535	0.0320892	0.0331788	0.0568005	0.0569244	0.0418762	0.108387		0.00882313	0.00363534	0.00397862	0.00451111	0.00399484	0.00307673	0.0048566	0.0162531
		0.4765		0.0605595	0.0759285	0.054479	0.0691335	0.0843057	0.0851199	0.0705678	0.0520701		0.0179272	0.0695725	0.0321015	0.0332492	0.0568846	0.0569553	0.0419398	0.108558		0.00885583	0.00365673	0.00398857	0.00453622	0.00399491	0.00311063	0.00489203	0.016251
		0.477		0.0605971	0.075965	0.0545298	0.0692215	0.0843316	0.0852088	0.0706416	0.0520637		0.0179843	0.0696888	0.0321126	0.0333183	0.0569675	0.0569866	0.0420027	0.108726		0.00888914	0.00367752	0.0039981	0.00456198	0.00399498	0.00314391	0.00492781	0.0162488
		0.4775		0.0606347	0.076	0.054579	0.0693077	0.0843564	0.0852966	0.0707158	0.052057		0.0180421	0.0698021	0.0321227	0.0333861	0.0570491	0.0570181	0.0420648	0.108891		0.00892306	0.00369771	0.00400722	0.00458839	0.00399505	0.00317658	0.00496394	0.0162464
		0.478		0.0606721	0.0760338	0.0546265	0.0693919	0.0843803	0.0853835	0.0707905	0.05205		0.0181005	0.0699127	0.0321317	0.0334524	0.0571295	0.0570499	0.0421261	0.109055		0.00895759	0.00371732	0.00401593	0.00461546	0.00399512	0.00320862	0.00500045	0.0162439
		0.4785		0.0607096	0.0760662	0.0546723	0.0694742	0.0844032	0.0854692	0.0708655	0.0520427		0.0181594	0.0700205	0.0321396	0.0335172	0.0572085	0.057082	0.0421865	0.109215		0.00899273	0.00373635	0.00402426	0.00464318	0.00399519	0.00324003	0.00503732	0.0162413
		0.479		0.0607471	0.0760973	0.0547164	0.0695545	0.0844251	0.0855539	0.0709408	0.0520351		0.0182189	0.0701255	0.0321465	0.0335805	0.0572861	0.0571144	0.0422461	0.109373		0.00902845	0.0037548	0.00403219	0.00467156	0.00399527	0.00327081	0.00507456	0.0162385
		0.4795		0.0607846	0.0761272	0.0547589	0.0696327	0.084446	0.0856374	0.0710165	0.0520273		0.0182789	0.0702278	0.0321523	0.0336423	0.0573624	0.0571472	0.0423047	0.109528		0.00906476	0.0037727	0.00403975	0.0047006	0.00399535	0.00330096	0.00511217	0.0162357
		0.48		0.0608221	0.0761558	0.0547996	0.0697089	0.084466	0.0857197	0.0710924	0.0520191		0.0183394	0.0703273	0.0321571	0.0337025	0.0574373	0.0571802	0.0423625	0.10968		0.00910164	0.00379003	0.00404694	0.00473029	0.00399542	0.00333047	0.00515015	0.0162327
		0.4805		0.0608596	0.0761832	0.0548387	0.069783	0.084485	0.0858009	0.0711685	0.0520105		0.0184003	0.0704241	0.0321609	0.0337611	0.0575107	0.0572137	0.0424193	0.109829		0.00913908	0.00380681	0.00405378	0.00476063	0.0039955	0.00335935	0.0051885	0.0162296
		0.481		0.0608973	0.0762095	0.054876	0.0698549	0.0845031	0.0858808	0.0712448	0.0520016		0.0184617	0.0705183	0.0321636	0.0338181	0.0575826	0.0572475	0.0424751	0.109975		0.00917707	0.00382305	0.00406027	0.00479162	0.00399558	0.00338759	0.00522721	0.0162265
		0.4815		0.060935	0.0762347	0.0549116	0.0699247	0.0845203	0.0859595	0.0713213	0.0519924		0.0185235	0.0706097	0.0321653	0.0338734	0.0576529	0.0572816	0.04253	0.110118		0.0092156	0.00383876	0.00406641	0.00482326	0.00399566	0.00341519	0.00526628	0.0162233
		0.482		0.0609727	0.0762587	0.0549455	0.0699923	0.0845366	0.0860369	0.0713979	0.0519828		0.0185856	0.0706986	0.032166	0.033927	0.0577217	0.0573161	0.042584	0.110257		0.00925465	0.00385394	0.00407223	0.00485555	0.00399574	0.00344216	0.00530571	0.01622
		0.4825		0.0610106	0.0762817	0.0549777	0.0700577	0.084552	0.0861131	0.0714745	0.0519729		0.0186481	0.0707848	0.0321657	0.0339789	0.0577889	0.0573509	0.042637	0.110394		0.0092942	0.0038686	0.00407772	0.00488846	0.00399582	0.00346849	0.00534549	0.0162166
		0.483		0.0610486	0.0763036	0.0550082	0.0701209	0.0845664	0.0861879	0.0715511	0.0519625		0.0187108	0.0708684	0.0321644	0.0340291	0.0578545	0.0573861	0.0426889	0.110526		0.00933425	0.00388275	0.0040829	0.00492201	0.00399591	0.0034942	0.00538561	0.0162131
		0.4835		0.0610867	0.0763245	0.055037	0.0701818	0.08458	0.0862614	0.0716277	0.0519518		0.0187738	0.0709495	0.0321621	0.0340775	0.0579184	0.0574217	0.0427399	0.110655		0.00937476	0.00389639	0.00408777	0.00495619	0.00399599	0.00351927	0.00542606	0.0162096
		0.484		0.0611249	0.0763444	0.055064	0.0702405	0.0845928	0.0863335	0.0717042	0.0519407		0.0188369	0.0710281	0.0321589	0.0341241	0.0579806	0.0574576	0.0427899	0.11078		0.00941573	0.00390955	0.00409235	0.00499098	0.00399607	0.00354372	0.00546684	0.0162061
		0.4845		0.0611633	0.0763634	0.0550894	0.0702969	0.0846046	0.0864044	0.0717805	0.0519291		0.0189002	0.0711042	0.0321546	0.0341689	0.0580411	0.0574939	0.0428389	0.110902		0.00945713	0.00392222	0.00409664	0.00502638	0.00399615	0.00356755	0.00550793	0.0162025
		0.485		0.0612017	0.0763815	0.055113	0.070351	0.0846156	0.0864738	0.0718567	0.0519172		0.0189636	0.0711779	0.0321494	0.0342119	0.0580999	0.0575306	0.0428869	0.11102		0.00949894	0.00393442	0.00410065	0.00506238	0.00399624	0.00359076	0.00554931	0.0161989
		0.4855		0.0612404	0.0763986	0.0551349	0.0704027	0.0846258	0.0865419	0.0719326	0.0519048		0.019027	0.0712491	0.0321433	0.0342531	0.0581569	0.0575675	0.0429339	0.111134		0.00954113	0.00394614	0.00410438	0.00509897	0.00399632	0.00361336	0.00559098	0.0161952
		0.486		0.0612792	0.0764149	0.0551552	0.0704522	0.0846351	0.0866086	0.0720082	0.051892		0.0190904	0.071318	0.0321362	0.0342925	0.0582121	0.0576049	0.0429798	0.111244		0.00958368	0.00395741	0.00410786	0.00513613	0.0039964	0.00363534	0.00563292	0.0161915
		0.4865		0.0613181	0.0764303	0.0551737	0.0704993	0.0846436	0.086674	0.0720835	0.0518787		0.0191537	0.0713846	0.0321281	0.03433	0.0582655	0.0576425	0.0430248	0.111349		0.00962657	0.00396824	0.00411108	0.00517386	0.00399649	0.00365673	0.00567511	0.0161878
		0.487		0.0613572	0.076445	0.0551906	0.0705441	0.0846512	0.0867379	0.0721584	0.051865		0.0192169	0.0714488	0.0321192	0.0343657	0.0583171	0.0576805	0.0430687	0.111451		0.00966976	0.00397862	0.00411405	0.00521214	0.00399657	0.00367752	0.00571753	0.0161841
		0.4875		0.0613964	0.0764588	0.0552058	0.0705865	0.084658	0.0868005	0.0722329	0.0518508		0.0192799	0.0715108	0.0321092	0.0343995	0.0583669	0.0577188	0.0431117	0.111549		0.00971323	0.00398857	0.00411678	0.00525096	0.00399665	0.00369771	0.00576016	0.0161803
		0.488		0.0614358	0.0764719	0.0552193	0.0706266	0.0846639	0.0868616	0.0723069	0.0518361		0.0193428	0.0715705	0.0320984	0.0344315	0.0584149	0.0577573	0.0431536	0.111642		0.00975694	0.0039981	0.00411929	0.00529029	0.00399673	0.00371732	0.00580298	0.0161766
		0.4885		0.0614754	0.0764842	0.0552312	0.0706644	0.0846691	0.0869214	0.0723803	0.051821		0.0194053	0.0716281	0.0320866	0.0344615	0.058461	0.0577962	0.0431945	0.111731		0.00980087	0.00400722	0.00412156	0.00533013	0.00399681	0.00373635	0.00584596	0.0161728
		0.489		0.0615151	0.0764959	0.0552414	0.0706998	0.0846734	0.0869798	0.0724532	0.0518053		0.0194676	0.0716835	0.0320739	0.0344898	0.0585052	0.0578353	0.0432344	0.111815		0.00984497	0.00401593	0.00412362	0.00537045	0.0039969	0.0037548	0.00588907	0.016169
		0.4895		0.0615549	0.0765068	0.05525	0.0707328	0.0846769	0.0870367	0.0725255	0.0517892		0.0195295	0.0717368	0.0320604	0.0345161	0.0585476	0.0578746	0.0432734	0.111895		0.00988921	0.00402426	0.00412548	0.00541124	0.00399698	0.0037727	0.0059323	0.0161652
		0.49		0.0615949	0.0765171	0.055257	0.0707634	0.0846795	0.0870923	0.0725971	0.0517726		0.019591	0.0717881	0.0320459	0.0345406	0.058588	0.0579142	0.0433113	0.11197		0.00993356	0.00403219	0.00412713	0.00545247	0.00399706	0.00379003	0.00597561	0.0161615
		0.4905		0.061635	0.0765267	0.0552624	0.0707918	0.0846813	0.0871465	0.072668	0.0517554		0.0196521	0.0718373	0.0320305	0.0345632	0.0586267	0.0579539	0.0433482	0.11204		0.00997797	0.00403975	0.00412858	0.00549412	0.00399714	0.00380681	0.00601897	0.0161577
		0.491		0.0616752	0.0765358	0.0552661	0.0708177	0.0846824	0.0871993	0.0727382	0.0517377		0.0197127	0.0718845	0.0320142	0.034584	0.0586634	0.0579939	0.0433842	0.112106		0.0100224	0.00404694	0.00412985	0.00553617	0.00399721	0.00382305	0.00606235	0.016154
		0.4915		0.0617155	0.0765442	0.0552683	0.0708413	0.0846825	0.0872507	0.0728075	0.0517195		0.0197727	0.0719298	0.031997	0.0346029	0.0586982	0.0580339	0.0434192	0.112167		0.0100668	0.00405378	0.00413094	0.00557858	0.00399729	0.00383876	0.0061057	0.0161502
		0.492		0.061756	0.0765521	0.0552689	0.0708626	0.0846819	0.0873008	0.0728759	0.0517007		0.0198322	0.0719732	0.031979	0.03462	0.0587312	0.0580741	0.0434533	0.112223		0.0101111	0.00406027	0.00413186	0.00562135	0.00399737	0.00385394	0.006149	0.0161465
		0.4925		0.0617965	0.0765594	0.055268	0.0708815	0.0846804	0.0873494	0.0729434	0.0516814		0.0198911	0.0720147	0.0319601	0.0346352	0.0587622	0.0581144	0.0434864	0.112275		0.0101554	0.00406641	0.00413261	0.00566443	0.00399745	0.0038686	0.0061922	0.0161428
		0.493		0.061837	0.0765663	0.0552655	0.0708981	0.0846781	0.0873968	0.07301	0.0516616		0.0199493	0.0720544	0.0319403	0.0346486	0.0587914	0.0581548	0.0435185	0.112321		0.0101995	0.00407223	0.00413319	0.00570779	0.00399752	0.00388275	0.00623527	0.0161391
		0.4935		0.0618776	0.0765726	0.0552615	0.0709124	0.084675	0.0874427	0.0730755	0.0516412		0.0200069	0.0720923	0.0319196	0.0346602	0.0588187	0.0581951	0.0435498	0.112362		0.0102434	0.00407772	0.00413363	0.00575141	0.0039976	0.00389639	0.00627817	0.0161355
		0.494		0.0619182	0.0765784	0.0552561	0.0709243	0.084671	0.0874873	0.0731399	0.0516202		0.0200637	0.0721285	0.0318981	0.03467	0.0588441	0.0582355	0.0435801	0.112398		0.0102871	0.0040829	0.00413391	0.00579525	0.00399767	0.00390955	0.00632087	0.0161319
		0.4945		0.0619589	0.0765838	0.0552491	0.070934	0.0846661	0.0875306	0.0732032	0.0515987		0.0201197	0.072163	0.0318758	0.034678	0.0588676	0.0582758	0.0436095	0.11243		0.0103306	0.00408777	0.00413405	0.00583928	0.00399774	0.00392222	0.00636334	0.0161283
		0.495		0.0619995	0.0765887	0.0552406	0.0709414	0.0846605	0.0875725	0.0732653	0.0515765		0.0201748	0.0721958	0.0318526	0.0346843	0.0588893	0.058316	0.043638	0.112456		0.0103738	0.00409235	0.00413406	0.00588346	0.00399781	0.00393442	0.00640554	0.0161247
		0.4955		0.0620401	0.0765932	0.0552307	0.0709464	0.0846539	0.0876131	0.0733261	0.0515538		0.0202291	0.072227	0.0318285	0.0346887	0.0589091	0.0583561	0.0436656	0.112477		0.0104166	0.00409664	0.00413394	0.00592774	0.00399788	0.00394614	0.00644745	0.0161212
		0.496		0.0620805	0.0765973	0.0552194	0.0709492	0.0846465	0.0876524	0.0733857	0.0515305		0.0202825	0.0722566	0.0318036	0.0346915	0.0589271	0.0583961	0.0436923	0.112492		0.0104592	0.00410065	0.00413369	0.0059721	0.00399796	0.00395741	0.00648903	0.0161177
		0.4965		0.0621209	0.076601	0.0552067	0.0709498	0.0846382	0.0876904	0.073444	0.0515067		0.020335	0.0722847	0.0317779	0.0346925	0.0589432	0.0584358	0.0437182	0.112503		0.0105014	0.00410438	0.00413333	0.00601649	0.00399802	0.00396824	0.00653027	0.0161143
		0.497		0.0621612	0.0766043	0.0551926	0.0709481	0.084629	0.0877271	0.0735009	0.0514822		0.0203864	0.0723113	0.0317514	0.0346918	0.0589574	0.0584753	0.0437432	0.112508		0.0105432	0.00410786	0.00413285	0.00606086	0.00399809	0.00397862	0.00657113	0.0161109
		0.4975		0.0622013	0.0766073	0.0551772	0.0709442	0.084619	0.0877625	0.0735565	0.0514571		0.0204368	0.0723364	0.0317241	0.0346894	0.0589699	0.0585146	0.0437674	0.112508		0.0105845	0.00411108	0.00413227	0.00610518	0.00399816	0.00398857	0.00661159	0.0161075
		0.498		0.0622412	0.0766099	0.0551604	0.0709382	0.084608	0.0877967	0.0736106	0.0514314		0.0204861	0.0723601	0.0316959	0.0346854	0.0589805	0.0585536	0.0437907	0.112503		0.0106255	0.00411405	0.00413158	0.0061494	0.00399822	0.0039981	0.00665164	0.0161042
		0.4985		0.0622808	0.0766122	0.0551423	0.0709299	0.0845961	0.0878296	0.0736632	0.0514052		0.0205342	0.0723824	0.031667	0.0346797	0.0589894	0.0585924	0.0438132	0.112492		0.010666	0.00411678	0.0041308	0.00619348	0.00399829	0.00400722	0.00669125	0.0161009
		0.499		0.0623202	0.0766142	0.0551229	0.0709194	0.0845833	0.0878612	0.0737144	0.0513783		0.0205812	0.0724033	0.0316372	0.0346724	0.0589964	0.0586308	0.043835	0.112477		0.010706	0.00411929	0.00412992	0.0062374	0.00399835	0.00401593	0.00673041	0.0160976
		0.4995		0.0623592	0.0766159	0.0551023	0.0709068	0.0845696	0.0878916	0.073764	0.0513508		0.020627	0.072423	0.0316067	0.0346636	0.0590017	0.0586688	0.0438559	0.112456		0.0107456	0.00412156	0.00412896	0.0062811	0.00399841	0.00402426	0.00676908	0.0160944
		0.5		0.0623979	0.0766173	0.0550804	0.0708921	0.0845549	0.0879208	0.0738121	0.0513227		0.0206715	0.0724414	0.0315754	0.0346532	0.0590052	0.0587065	0.0438761	0.112429		0.0107846	0.00412362	0.00412791	0.00632457	0.00399847	0.00403219	0.00680726	0.0160913
		0.5005		0.0624361	0.0766185	0.0550573	0.0708753	0.0845392	0.0879488	0.0738586	0.051294		0.0207147	0.0724585	0.0315433	0.0346413	0.059007	0.0587438	0.0438956	0.112398		0.0108231	0.00412548	0.00412679	0.00636776	0.00399853	0.00403975	0.00684494	0.0160882
		0.501		0.062474	0.0766194	0.055033	0.0708564	0.0845226	0.0879755	0.0739036	0.0512647		0.0207565	0.0724745	0.0315105	0.0346278	0.0590071	0.0587806	0.0439142	0.112361		0.0108611	0.00412713	0.00412559	0.00641066	0.00399859	0.00404694	0.0068821	0.0160852
		0.5015		0.0625113	0.07662	0.0550076	0.0708355	0.084505	0.0880011	0.073947	0.0512348		0.0207969	0.0724893	0.0314769	0.034613	0.0590055	0.0588171	0.0439322	0.112319		0.0108985	0.00412858	0.00412432	0.00645322	0.00399865	0.00405378	0.00691871	0.0160822
		0.502		0.0625481	0.0766204	0.0549811	0.0708126	0.0844864	0.0880255	0.0739887	0.0512043		0.020836	0.072503	0.0314426	0.0345967	0.0590022	0.0588531	0.0439494	0.112271		0.0109354	0.00412985	0.00412299	0.00649543	0.0039987	0.00406027	0.00695478	0.0160792
		0.5025		0.0625843	0.0766206	0.0549535	0.0707876	0.0844668	0.0880487	0.0740288	0.0511732		0.0208735	0.0725156	0.0314076	0.0345789	0.0589973	0.0588886	0.043966	0.112219		0.0109717	0.00413094	0.0041216	0.00653726	0.00399876	0.00406641	0.0069903	0.0160763
		0.503		0.06262	0.0766206	0.0549249	0.0707607	0.0844461	0.0880708	0.0740673	0.0511415		0.0209096	0.0725271	0.0313718	0.0345599	0.0589907	0.0589237	0.0439819	0.112161		0.0110074	0.00413186	0.00412015	0.00657868	0.00399881	0.00407223	0.00702524	0.0160735
		0.5035		0.062655	0.0766203	0.0548952	0.0707318	0.0844244	0.0880918	0.0741041	0.0511092		0.0209442	0.0725377	0.0313353	0.0345395	0.0589825	0.0589583	0.043997	0.112098		0.0110425	0.00413261	0.00411864	0.00661967	0.00399887	0.00407772	0.00705961	0.0160707
		0.504		0.0626893	0.0766199	0.0548645	0.070701	0.0844016	0.0881116	0.0741393	0.0510763		0.0209773	0.0725472	0.0312982	0.0345178	0.0589728	0.0589924	0.0440116	0.112029		0.011077	0.00413319	0.00411709	0.00666022	0.00399892	0.0040829	0.00709339	0.016068
		0.5045		0.062723	0.0766193	0.0548329	0.0706684	0.0843778	0.0881303	0.0741728	0.0510429		0.0210088	0.0725558	0.0312603	0.0344949	0.0589614	0.059026	0.0440255	0.111956		0.0111109	0.00413363	0.00411549	0.00670029	0.00399897	0.00408777	0.00712658	0.0160653
		0.505		0.0627559	0.0766185	0.0548004	0.0706339	0.0843529	0.0881479	0.0742046	0.0510089		0.0210387	0.0725635	0.0312218	0.0344708	0.0589486	0.059059	0.0440387	0.111878		0.0111442	0.00413391	0.00411385	0.00673988	0.00399902	0.00409235	0.00715917	0.0160626
		0.5055		0.0627881	0.0766175	0.054767	0.0705976	0.0843268	0.0881644	0.0742348	0.0509743		0.0210671	0.0725703	0.0311827	0.0344456	0.0589342	0.0590916	0.0440514	0.111794		0.0111768	0.00413405	0.00411218	0.00677897	0.00399907	0.00409664	0.00719115	0.0160601
		0.506		0.0628194	0.0766163	0.0547328	0.0705596	0.0842996	0.0881798	0.0742632	0.0509391		0.0210939	0.0725762	0.0311429	0.0344192	0.0589183	0.0591235	0.0440634	0.111705		0.0112089	0.00413406	0.00411046	0.00681753	0.00399911	0.00410065	0.00722253	0.0160575
		0.5065		0.06285	0.076615	0.0546977	0.0705197	0.0842713	0.0881942	0.07429	0.0509035		0.0211191	0.0725814	0.0311024	0.0343917	0.058901	0.059155	0.0440749	0.111612		0.0112403	0.00413394	0.00410872	0.00685556	0.00399916	0.00410438	0.00725329	0.0160551
		0.507		0.0628797	0.0766135	0.054662	0.0704783	0.0842418	0.0882075	0.0743151	0.0508672		0.0211428	0.0725857	0.0310614	0.0343633	0.0588823	0.0591859	0.0440858	0.111514		0.0112711	0.00413369	0.00410694	0.00689305	0.0039992	0.00410786	0.00728344	0.0160527
		0.5075		0.0629086	0.0766119	0.0546255	0.0704351	0.0842111	0.0882197	0.0743386	0.0508305		0.0211648	0.0725893	0.0310198	0.0343338	0.0588622	0.0592162	0.0440961	0.11141		0.0113012	0.00413333	0.00410514	0.00692997	0.00399924	0.00411108	0.00731297	0.0160503
		0.508		0.0629366	0.0766101	0.0545883	0.0703903	0.0841792	0.088231	0.0743604	0.0507933		0.0211853	0.0725921	0.0309776	0.0343035	0.0588407	0.059246	0.0441059	0.111302		0.0113307	0.00413285	0.00410332	0.00696632	0.00399929	0.00411405	0.00734188	0.016048
		0.5085		0.0629637	0.0766082	0.0545505	0.070344	0.0841461	0.0882411	0.0743805	0.0507555		0.0212041	0.0725942	0.0309349	0.0342723	0.0588179	0.0592752	0.0441152	0.111189		0.0113596	0.00413227	0.00410147	0.00700209	0.00399933	0.00411678	0.00737016	0.0160457
		0.509		0.0629899	0.0766061	0.0545122	0.0702961	0.0841118	0.0882503	0.074399	0.0507173		0.0212214	0.0725957	0.0308916	0.0342402	0.0587939	0.0593038	0.0441239	0.111072		0.0113878	0.00413158	0.00409961	0.00703727	0.00399937	0.00411929	0.00739783	0.0160435
		0.5095		0.0630151	0.0766039	0.0544733	0.0702468	0.0840761	0.0882585	0.0744158	0.0506787		0.0212371	0.0725965	0.0308478	0.0342074	0.0587685	0.0593319	0.0441322	0.11095		0.0114154	0.0041308	0.00409773	0.00707185	0.00399941	0.00412156	0.00742488	0.0160414
		0.51		0.0630393	0.0766015	0.054434	0.070196	0.0840393	0.0882656	0.074431	0.0506395		0.0212513	0.0725967	0.0308036	0.0341739	0.058742	0.0593593	0.04414	0.110823		0.0114424	0.00412992	0.00409584	0.00710582	0.00399944	0.00412362	0.0074513	0.0160393
		0.5105		0.0630626	0.076599	0.0543942	0.0701438	0.0840011	0.0882718	0.0744446	0.0506		0.0212639	0.0725963	0.0307589	0.0341398	0.0587143	0.0593862	0.0441472	0.110692		0.0114687	0.00412896	0.00409394	0.00713918	0.00399948	0.00412548	0.00747711	0.0160373
		0.511		0.0630849	0.0765963	0.054354	0.0700903	0.0839616	0.088277	0.0744567	0.0505601		0.021275	0.0725954	0.0307137	0.0341051	0.0586854	0.0594126	0.0441541	0.110557		0.0114944	0.00412791	0.00409203	0.00717193	0.00399952	0.00412713	0.0075023	0.0160353
		0.5115		0.0631062	0.0765936	0.0543136	0.0700355	0.0839207	0.0882812	0.0744671	0.0505198		0.0212846	0.0725939	0.0306681	0.0340698	0.0586554	0.0594383	0.0441605	0.110417		0.0115195	0.00412679	0.00409012	0.00720404	0.00399955	0.00412858	0.00752688	0.0160334
		0.512		0.0631264	0.0765906	0.0542728	0.0699796	0.0838785	0.0882845	0.0744759	0.0504791		0.0212927	0.0725919	0.0306222	0.0340341	0.0586244	0.0594635	0.0441664	0.110273		0.011544	0.00412559	0.0040882	0.00723553	0.00399958	0.00412985	0.00755084	0.0160315
		0.5125		0.0631456	0.0765875	0.0542319	0.0699224	0.0838349	0.0882868	0.0744832	0.0504381		0.0212994	0.0725894	0.0305759	0.033998	0.0585924	0.059488	0.044172	0.110125		0.0115678	0.00412432	0.00408628	0.00726639	0.00399961	0.00413094	0.0075742	0.0160296
		0.513		0.0631637	0.0765843	0.0541908	0.0698641	0.0837899	0.0882882	0.074489	0.0503968		0.0213047	0.0725864	0.0305292	0.0339615	0.0585594	0.059512	0.0441771	0.109974		0.011591	0.00412299	0.00408436	0.00729662	0.00399965	0.00413186	0.00759695	0.0160279
		0.5135		0.0631808	0.0765809	0.0541496	0.0698048	0.0837435	0.0882886	0.0744933	0.0503552		0.0213085	0.072583	0.0304823	0.0339248	0.0585255	0.0595355	0.0441818	0.109818		0.0116136	0.0041216	0.00408244	0.00732621	0.00399968	0.00413261	0.00761911	0.0160261
		0.514		0.0631968	0.0765774	0.0541084	0.0697445	0.0836957	0.0882882	0.0744961	0.0503133		0.021311	0.0725792	0.0304351	0.0338877	0.0584907	0.0595583	0.0441862	0.109659		0.0116356	0.00412015	0.00408052	0.00735517	0.00399971	0.00413319	0.00764066	0.0160245
		0.5145		0.0632116	0.0765737	0.0540671	0.0696832	0.0836464	0.0882868	0.0744975	0.0502713		0.0213122	0.0725749	0.0303877	0.0338505	0.0584551	0.0595806	0.0441902	0.109496		0.011657	0.00411864	0.00407861	0.00738349	0.00399973	0.00413363	0.00766163	0.0160228
		0.515		0.0632254	0.0765699	0.0540259	0.0696211	0.0835957	0.0882844	0.0744974	0.050229		0.0213121	0.0725703	0.0303401	0.033813	0.0584187	0.0596023	0.0441938	0.10933		0.0116777	0.00411709	0.00407671	0.00741118	0.00399976	0.00413391	0.00768202	0.0160212
		0.5155		0.0632381	0.0765659	0.0539848	0.0695581	0.0835434	0.0882812	0.074496	0.0501866		0.0213108	0.0725653	0.0302923	0.0337755	0.0583816	0.0596235	0.0441971	0.10916		0.0116979	0.00411549	0.00407482	0.00743823	0.00399979	0.00413405	0.00770182	0.0160197
		0.516		0.0632496	0.0765617	0.0539439	0.0694943	0.0834897	0.0882771	0.0744931	0.0501441		0.0213083	0.07256	0.0302444	0.0337378	0.0583438	0.0596441	0.0442	0.108987		0.0117175	0.00411385	0.00407294	0.00746465	0.00399981	0.00413406	0.00772106	0.0160182
		0.5165		0.0632601	0.0765573	0.0539031	0.0694297	0.0834344	0.0882721	0.074489	0.0501015		0.0213046	0.0725544	0.0301964	0.0337002	0.0583054	0.0596641	0.0442026	0.108811		0.0117366	0.00411218	0.00407106	0.00749044	0.00399984	0.00413394	0.00773972	0.0160168
		0.517		0.0632693	0.0765528	0.0538625	0.0693645	0.0833776	0.0882661	0.0744835	0.0500589		0.0212998	0.0725485	0.0301484	0.0336625	0.0582664	0.0596836	0.0442049	0.108633		0.011755	0.00411046	0.00406921	0.00751559	0.00399986	0.00413369	0.00775783	0.0160154
		0.5175		0.0632775	0.0765481	0.0538222	0.0692986	0.0833192	0.0882593	0.0744768	0.0500163		0.021294	0.0725423	0.0301005	0.0336249	0.058227	0.0597025	0.044207	0.108452		0.0117729	0.00410872	0.00406736	0.00754013	0.00399988	0.00413333	0.00777538	0.016014
		0.518		0.0632845	0.0765431	0.0537821	0.0692321	0.0832593	0.0882517	0.0744688	0.0499737		0.0212872	0.0725359	0.0300525	0.0335873	0.0581871	0.0597209	0.0442087	0.108268		0.0117902	0.00410694	0.00406553	0.00756404	0.0039999	0.00413285	0.00779239	0.0160127
		0.5185		0.0632903	0.076538	0.0537424	0.069165	0.0831977	0.0882431	0.0744596	0.0499312		0.0212794	0.0725292	0.0300047	0.0335498	0.0581468	0.0597388	0.0442101	0.108082		0.011807	0.00410514	0.00406372	0.00758733	0.00399992	0.00413227	0.00780886	0.0160115
		0.519		0.063295	0.0765326	0.053703	0.0690974	0.0831346	0.0882337	0.0744493	0.0498889		0.0212708	0.0725222	0.029957	0.0335125	0.0581062	0.0597561	0.0442113	0.107893		0.0118233	0.00410332	0.00406192	0.00761001	0.00399995	0.00413158	0.0078248	0.0160103
		0.5195		0.0632985	0.076527	0.0536641	0.0690294	0.0830699	0.0882235	0.0744378	0.0498466		0.0212613	0.0725151	0.0299095	0.0334753	0.0580653	0.0597729	0.0442122	0.107703		0.011839	0.00410147	0.00406014	0.00763208	0.00399996	0.0041308	0.00784021	0.0160091
		0.52		0.0633009	0.0765212	0.0536255	0.0689608	0.0830035	0.0882123	0.0744253	0.0498046		0.021251	0.0725078	0.0298622	0.0334383	0.0580241	0.0597892	0.0442129	0.107511		0.0118541	0.00409961	0.00405838	0.00765354	0.00399998	0.00412992	0.00785511	0.016008
		0.5205		0.063302	0.0765152	0.0535873	0.0688918	0.0829355	0.0882004	0.0744118	0.0497627		0.0212399	0.0725003	0.0298152	0.0334015	0.0579828	0.059805	0.0442133	0.107318		0.0118688	0.00409773	0.00405664	0.00767441	0.004	0.00412896	0.0078695	0.0160069
		0.521		0.063302	0.0765088	0.0535497	0.0688225	0.0828658	0.0881875	0.0743972	0.0497212		0.0212281	0.0724926	0.0297684	0.033365	0.0579414	0.0598202	0.0442135	0.107123		0.011883	0.00409584	0.00405493	0.00769469	0.00400002	0.00412791	0.00788339	0.0160058
		0.5215		0.0633009	0.0765023	0.0535125	0.0687528	0.0827945	0.0881739	0.0743817	0.0496798		0.0212156	0.0724848	0.029722	0.0333287	0.0578999	0.059835	0.0442135	0.106927		0.0118966	0.00409394	0.00405323	0.00771437	0.00400003	0.00412679	0.00789679	0.0160048
		0.522		0.0632985	0.0764954	0.0534758	0.0686828	0.0827216	0.0881594	0.0743653	0.0496388		0.0212025	0.0724768	0.0296759	0.0332928	0.0578584	0.0598493	0.0442133	0.10673		0.0119098	0.00409203	0.00405156	0.00773348	0.00400005	0.00412559	0.00790971	0.0160039
		0.5225		0.063295	0.0764882	0.0534397	0.0686126	0.0826469	0.088144	0.0743481	0.0495981		0.0211889	0.0724688	0.0296303	0.0332571	0.0578168	0.0598631	0.0442129	0.106532		0.0119224	0.00409012	0.0040499	0.00775202	0.00400006	0.00412432	0.00792215	0.0160029
		0.523		0.0632904	0.0764808	0.0534041	0.0685421	0.0825706	0.0881278	0.0743301	0.0495577		0.0211746	0.0724606	0.029585	0.0332218	0.0577753	0.0598765	0.0442123	0.106333		0.0119346	0.0040882	0.00404828	0.00776999	0.00400008	0.00412299	0.00793413	0.016002
		0.5235		0.0632845	0.076473	0.053369	0.0684713	0.0824926	0.0881108	0.0743113	0.0495176		0.0211599	0.0724523	0.0295401	0.0331869	0.0577339	0.0598893	0.0442115	0.106134		0.0119463	0.00408628	0.00404667	0.0077874	0.00400009	0.0041216	0.00794565	0.0160012
		0.524		0.0632775	0.0764649	0.0533346	0.0684004	0.0824129	0.088093	0.0742919	0.049478		0.0211446	0.072444	0.0294957	0.0331523	0.0576926	0.0599017	0.0442106	0.105934		0.0119576	0.00408436	0.00404509	0.00780426	0.0040001	0.00412015	0.00795672	0.0160004
		0.5245		0.0632694	0.0764564	0.0533007	0.0683294	0.0823315	0.0880743	0.0742718	0.0494387		0.021129	0.0724356	0.0294518	0.0331181	0.0576515	0.0599137	0.0442094	0.105734		0.0119684	0.00408244	0.00404354	0.00782057	0.00400012	0.00411864	0.00796736	0.0159996
		0.525		0.06326	0.0764476	0.0532675	0.0682583	0.0822484	0.0880548	0.0742511	0.0493998		0.0211129	0.0724271	0.0294084	0.0330843	0.0576105	0.0599252	0.0442081	0.105534		0.0119788	0.00408052	0.00404201	0.00783635	0.00400013	0.00411709	0.00797756	0.0159988
		0.5255		0.0632496	0.0764384	0.0532349	0.068187	0.0821636	0.0880345	0.0742299	0.0493614		0.0210964	0.0724186	0.0293655	0.0330509	0.0575698	0.0599363	0.0442067	0.105334		0.0119888	0.00407861	0.00404051	0.00785161	0.00400014	0.00411549	0.00798734	0.0159981
		0.526		0.0632379	0.0764288	0.0532029	0.0681157	0.0820772	0.0880134	0.0742083	0.0493234		0.0210796	0.0724101	0.0293232	0.033018	0.0575293	0.0599469	0.0442051	0.105135		0.0119983	0.00407671	0.00403903	0.00786634	0.00400015	0.00411385	0.00799671	0.0159974
		0.5265		0.0632252	0.0764188	0.0531715	0.0680444	0.0819891	0.0879914	0.0741862	0.0492858		0.0210625	0.0724015	0.0292814	0.0329855	0.057489	0.0599571	0.0442034	0.104935		0.0120074	0.00407482	0.00403758	0.00788056	0.00400016	0.00411218	0.00800567	0.0159968
		0.527		0.0632113	0.0764084	0.0531409	0.0679731	0.0818993	0.0879687	0.0741637	0.0492488		0.0210451	0.0723929	0.0292402	0.0329535	0.0574491	0.0599669	0.0442016	0.104737		0.0120161	0.00407294	0.00403616	0.00789428	0.00400017	0.00411046	0.00801424	0.0159962
		0.5275		0.0631962	0.0763976	0.0531108	0.0679018	0.0818078	0.0879451	0.0741408	0.0492121		0.0210275	0.0723843	0.0291996	0.032922	0.0574095	0.0599763	0.0441996	0.104538		0.0120245	0.00407106	0.00403477	0.0079075	0.00400017	0.00410872	0.00802243	0.0159956
		0.528		0.0631801	0.0763863	0.0530815	0.0678307	0.0817147	0.0879208	0.0741177	0.049176		0.0210096	0.0723757	0.0291596	0.0328909	0.0573703	0.0599854	0.0441976	0.104341		0.0120324	0.00406921	0.0040334	0.00792024	0.00400018	0.00410694	0.00803023	0.015995
		0.5285		0.0631628	0.0763745	0.0530528	0.0677596	0.0816199	0.0878956	0.0740943	0.0491403		0.0209915	0.0723671	0.0291202	0.0328603	0.0573314	0.059994	0.0441954	0.104144		0.01204	0.00406736	0.00403205	0.00793251	0.00400019	0.00410514	0.00803767	0.0159945
		0.529		0.0631444	0.0763622	0.0530248	0.0676886	0.0815235	0.0878696	0.0740707	0.0491051		0.0209733	0.0723585	0.0290814	0.0328302	0.0572929	0.0600022	0.0441931	0.103949		0.0120471	0.00406553	0.00403074	0.0079443	0.0040002	0.00410332	0.00804475	0.015994
		0.5295		0.063125	0.0763494	0.0529975	0.0676178	0.0814255	0.0878429	0.0740468	0.0490704		0.0209549	0.07235	0.0290432	0.0328007	0.0572549	0.0600101	0.0441908	0.103754		0.012054	0.00406372	0.00402945	0.00795564	0.0040002	0.00410147	0.00805148	0.0159935
		0.53		0.0631045	0.0763361	0.0529709	0.0675472	0.0813259	0.0878153	0.0740228	0.0490362		0.0209364	0.0723415	0.0290058	0.0327716	0.0572172	0.0600176	0.0441883	0.103561		0.0120605	0.00406192	0.00402819	0.00796652	0.00400021	0.00409961	0.00805786	0.0159931
		0.5305		0.0630828	0.0763222	0.0529449	0.0674768	0.0812248	0.087787	0.0739987	0.0490025		0.0209178	0.072333	0.0289689	0.0327431	0.0571801	0.0600248	0.0441858	0.103369		0.0120666	0.00406014	0.00402696	0.00797697	0.00400021	0.00409773	0.00806391	0.0159926
		0.531		0.0630602	0.0763078	0.0529197	0.0674067	0.0811221	0.0877579	0.0739745	0.0489693		0.0208991	0.0723246	0.0289327	0.0327151	0.0571433	0.0600316	0.0441832	0.103178		0.0120724	0.00405838	0.00402576	0.00798698	0.00400022	0.00409584	0.00806964	0.0159922
		0.5315		0.0630365	0.0762928	0.0528951	0.0673368	0.0810179	0.0877279	0.0739502	0.0489365		0.0208803	0.0723162	0.0288972	0.0326876	0.0571071	0.0600381	0.0441805	0.102989		0.0120779	0.00405664	0.00402458	0.00799658	0.00400022	0.00409394	0.00807505	0.0159919
		0.532		0.0630118	0.0762771	0.0528712	0.0672673	0.0809122	0.0876973	0.0739258	0.0489043		0.0208616	0.0723079	0.0288624	0.0326606	0.0570714	0.0600442	0.0441777	0.102801		0.0120831	0.00405493	0.00402343	0.00800575	0.00400023	0.00409203	0.00808015	0.0159915
		0.5325		0.0629861	0.0762609	0.052848	0.0671982	0.0808051	0.0876658	0.0739014	0.0488726		0.0208428	0.0722997	0.0288282	0.0326342	0.0570362	0.0600501	0.0441749	0.102615		0.012088	0.00405323	0.00402231	0.00801453	0.00400023	0.00409012	0.00808496	0.0159912
		0.533		0.0629593	0.076244	0.0528255	0.0671294	0.0806965	0.0876336	0.073877	0.0488414		0.020824	0.0722916	0.0287947	0.0326083	0.0570015	0.0600556	0.0441721	0.102431		0.0120926	0.00405156	0.00402121	0.0080229	0.00400024	0.0040882	0.00808947	0.0159909
		0.5335		0.0629316	0.0762264	0.0528036	0.067061	0.0805866	0.0876005	0.0738526	0.0488106		0.0208052	0.0722835	0.0287619	0.0325829	0.0569673	0.0600608	0.0441692	0.102249		0.0120968	0.0040499	0.00402015	0.0080309	0.00400024	0.00408628	0.0080937	0.0159906
		0.534		0.062903	0.0762081	0.0527825	0.0669931	0.0804754	0.0875668	0.0738283	0.0487804		0.0207865	0.0722755	0.0287298	0.0325581	0.0569337	0.0600657	0.0441662	0.102068		0.0121009	0.00404828	0.0040191	0.00803851	0.00400024	0.00408436	0.00809766	0.0159904
		0.5345		0.0628734	0.0761891	0.052762	0.0669258	0.0803628	0.0875323	0.0738039	0.0487506		0.0207678	0.0722676	0.0286984	0.0325339	0.0569006	0.0600704	0.0441632	0.10189		0.0121046	0.00404667	0.00401809	0.00804576	0.00400024	0.00408244	0.00810135	0.0159901
		0.535		0.0628429	0.0761694	0.0527421	0.0668589	0.0802491	0.087497	0.0737797	0.0487213		0.0207492	0.0722598	0.0286676	0.0325101	0.0568681	0.0600747	0.0441602	0.101714		0.0121081	0.00404509	0.0040171	0.00805265	0.00400024	0.00408052	0.00810478	0.0159899
		0.5355		0.0628115	0.0761489	0.0527229	0.0667926	0.0801341	0.087461	0.0737555	0.0486925		0.0207306	0.0722521	0.0286376	0.0324869	0.0568362	0.0600788	0.0441571	0.10154		0.0121113	0.00404354	0.00401614	0.00805918	0.00400025	0.00407861	0.00810796	0.0159897
		0.536		0.0627793	0.0761277	0.0527044	0.066727	0.0800181	0.0874243	0.0737314	0.0486641		0.0207122	0.0722445	0.0286082	0.0324643	0.0568048	0.0600826	0.044154	0.101368		0.0121143	0.00404201	0.00401521	0.00806538	0.00400025	0.00407671	0.0081109	0.0159895
		0.5365		0.0627462	0.0761056	0.0526865	0.066662	0.0799009	0.0873868	0.0737073	0.0486362		0.0206939	0.072237	0.0285795	0.0324422	0.056774	0.0600861	0.0441509	0.101198		0.012117	0.00404051	0.0040143	0.00807124	0.00400025	0.00407482	0.00811361	0.0159894
		0.537		0.0627123	0.0760828	0.0526692	0.0665976	0.0797828	0.0873486	0.0736834	0.0486087		0.0206757	0.0722296	0.0285515	0.0324206	0.0567438	0.0600894	0.0441478	0.101031		0.0121195	0.00403903	0.00401341	0.00807678	0.00400025	0.00407294	0.00811608	0.0159892
		0.5375		0.0626776	0.0760591	0.0526526	0.0665341	0.0796637	0.0873097	0.0736596	0.0485817		0.0206576	0.0722223	0.0285242	0.0323995	0.0567142	0.0600925	0.0441447	0.100866		0.0121218	0.00403758	0.00401256	0.00808201	0.00400025	0.00407106	0.00811834	0.0159891
		0.538		0.0626421	0.0760345	0.0526365	0.0664712	0.0795438	0.0872701	0.0736358	0.0485551		0.0206397	0.0722151	0.0284975	0.032379	0.0566852	0.0600953	0.0441415	0.100703		0.0121239	0.00403616	0.00401172	0.00808693	0.00400025	0.00406921	0.00812039	0.015989
		0.5385		0.0626059	0.076009	0.0526211	0.0664092	0.0794231	0.0872298	0.0736122	0.0485289		0.020622	0.0722081	0.0284715	0.032359	0.0566567	0.0600979	0.0441383	0.100543		0.0121257	0.00403477	0.00401092	0.00809155	0.00400025	0.00406736	0.00812223	0.0159889
		0.539		0.062569	0.0759827	0.0526062	0.066348	0.0793016	0.0871888	0.0735886	0.0485031		0.0206044	0.0722011	0.0284462	0.0323395	0.0566289	0.0601003	0.0441352	0.100386		0.0121274	0.0040334	0.00401013	0.00809588	0.00400025	0.00406553	0.00812387	0.0159888
		0.5395		0.0625314	0.0759554	0.0525919	0.0662877	0.0791796	0.0871472	0.0735652	0.0484777		0.020587	0.0721943	0.0284216	0.0323206	0.0566017	0.0601024	0.044132	0.100231		0.0121288	0.00403205	0.00400937	0.00809993	0.00400025	0.00406372	0.00812532	0.0159887
		0.54		0.0624932	0.0759271	0.0525782	0.0662282	0.079057	0.0871049	0.0735419	0.0484527		0.0205698	0.0721877	0.0283976	0.0323021	0.056575	0.0601044	0.0441288	0.100078		0.0121301	0.00403074	0.00400864	0.00810371	0.00400025	0.00406192	0.00812659	0.0159887
		0.5405		0.0624544	0.0758979	0.052565	0.0661696	0.078934	0.0870619	0.0735186	0.0484281		0.0205528	0.0721811	0.0283742	0.0322842	0.056549	0.0601062	0.0441256	0.0999281		0.0121312	0.00402945	0.00400793	0.00810723	0.00400025	0.00406014	0.00812768	0.0159886
		0.541		0.062415	0.0758677	0.0525524	0.0661119	0.0788107	0.0870184	0.0734955	0.0484038		0.020536	0.0721747	0.0283515	0.0322668	0.0565235	0.0601077	0.0441225	0.0997807		0.0121321	0.00402819	0.00400724	0.00811048	0.00400025	0.00405838	0.0081286	0.0159886
		0.5415		0.0623751	0.0758364	0.0525403	0.0660552	0.0786871	0.0869742	0.0734724	0.0483799		0.0205194	0.0721684	0.0283295	0.0322499	0.0564987	0.0601091	0.0441193	0.0996359		0.0121328	0.00402696	0.00400657	0.00811349	0.00400024	0.00405664	0.00812935	0.0159886
		0.542		0.0623347	0.0758041	0.0525287	0.0659994	0.0785633	0.0869294	0.0734494	0.0483563		0.020503	0.0721622	0.028308	0.0322334	0.0564744	0.0601103	0.0441161	0.0994937		0.0121334	0.00402576	0.00400593	0.00811626	0.00400024	0.00405493	0.00812995	0.0159886
		0.5425		0.0622938	0.0757708	0.0525175	0.0659446	0.0784394	0.086884	0.0734265	0.048333		0.0204868	0.0721562	0.0282872	0.0322175	0.0564508	0.0601113	0.044113	0.0993542		0.0121339	0.00402458	0.00400531	0.0081188	0.00400024	0.00405323	0.0081304	0.0159886
		0.543		0.0622526	0.0757363	0.0525069	0.0658907	0.0783154	0.0868381	0.0734036	0.04831		0.0204709	0.0721503	0.0282671	0.032202	0.0564277	0.0601122	0.0441099	0.0992172		0.0121341	0.00402343	0.00400471	0.00812111	0.00400024	0.00405156	0.0081307	0.0159886
		0.5435		0.062211	0.0757008	0.0524967	0.0658378	0.0781916	0.0867916	0.0733807	0.0482874		0.0204552	0.0721446	0.0282475	0.032187	0.0564052	0.0601129	0.0441068	0.0990828		0.0121343	0.00402231	0.00400413	0.00812321	0.00400024	0.0040499	0.00813086	0.0159886
		0.544		0.062169	0.0756641	0.0524869	0.0657859	0.0780678	0.0867446	0.0733579	0.0482649		0.0204397	0.072139	0.0282285	0.0321725	0.0563833	0.0601134	0.0441037	0.0989511		0.0121343	0.00402121	0.00400358	0.00812509	0.00400023	0.00404828	0.00813089	0.0159887
		0.5445		0.0621268	0.0756263	0.0524776	0.0657351	0.0779442	0.086697	0.0733351	0.0482428		0.0204245	0.0721335	0.0282102	0.0321585	0.056362	0.0601138	0.0441006	0.0988219		0.0121342	0.00402015	0.00400304	0.00812677	0.00400023	0.00404667	0.00813079	0.0159887
		0.545		0.0620844	0.0755873	0.0524687	0.0656852	0.0778209	0.086649	0.0733122	0.0482209		0.0204096	0.0721282	0.0281924	0.0321449	0.0563413	0.0601141	0.0440975	0.0986953		0.0121339	0.0040191	0.00400253	0.00812826	0.00400023	0.00404509	0.00813056	0.0159888
		0.5455		0.0620419	0.0755471	0.0524602	0.0656363	0.0776979	0.0866006	0.0732893	0.0481992		0.0203949	0.072123	0.0281752	0.0321317	0.0563211	0.0601142	0.0440945	0.0985713		0.0121336	0.00401809	0.00400203	0.00812956	0.00400023	0.00404354	0.00813023	0.0159889
		0.546		0.0619992	0.0755057	0.052452	0.0655884	0.0775753	0.0865517	0.0732664	0.0481777		0.0203804	0.0721179	0.0281586	0.032119	0.0563015	0.0601142	0.0440915	0.0984499		0.0121331	0.0040171	0.00400156	0.00813068	0.00400022	0.00404201	0.00812978	0.0159889
		0.5465		0.0619564	0.0754631	0.0524442	0.0655415	0.0774532	0.0865024	0.0732434	0.0481565		0.0203662	0.072113	0.0281425	0.0321068	0.0562825	0.0601141	0.0440885	0.098331		0.0121325	0.00401614	0.0040011	0.00813162	0.00400022	0.00404051	0.00812922	0.015989
		0.547		0.0619136	0.0754192	0.0524367	0.0654956	0.0773315	0.0864527	0.0732203	0.0481354		0.0203523	0.0721082	0.028127	0.032095	0.056264	0.0601138	0.0440856	0.0982146		0.0121318	0.00401521	0.00400066	0.00813239	0.00400022	0.00403903	0.00812857	0.0159891
		0.5475		0.0618708	0.0753741	0.0524295	0.0654507	0.0772105	0.0864026	0.0731971	0.0481145		0.0203386	0.0721036	0.028112	0.0320836	0.0562461	0.0601135	0.0440827	0.0981008		0.012131	0.0040143	0.00400024	0.008133	0.00400021	0.00403758	0.00812782	0.0159892
		0.548		0.0618281	0.0753276	0.0524226	0.0654069	0.0770901	0.0863523	0.0731738	0.0480937		0.0203252	0.0720991	0.0280976	0.0320726	0.0562287	0.060113	0.0440798	0.0979894		0.0121302	0.00401341	0.00399984	0.00813346	0.00400021	0.00403616	0.00812698	0.0159893
		0.5485		0.0617855	0.0752799	0.052416	0.0653639	0.0769703	0.0863016	0.0731503	0.048073		0.020312	0.0720948	0.0280837	0.032062	0.0562118	0.0601124	0.044077	0.0978804		0.0121292	0.00401256	0.00399946	0.00813377	0.00400021	0.00403477	0.00812605	0.0159894
		0.549		0.061743	0.0752309	0.0524096	0.065322	0.0768513	0.0862507	0.0731266	0.0480525		0.0202992	0.0720906	0.0280703	0.0320518	0.0561955	0.0601118	0.0440741	0.0977739		0.0121282	0.00401172	0.00399909	0.00813394	0.00400021	0.0040334	0.00812504	0.0159895
		0.5495		0.0617007	0.0751805	0.0524034	0.065281	0.0767332	0.0861995	0.0731027	0.0480321		0.0202866	0.0720865	0.0280574	0.032042	0.0561797	0.060111	0.0440714	0.0976697		0.012127	0.00401092	0.00399874	0.00813397	0.0040002	0.00403205	0.00812395	0.0159896
		0.55		0.0616586	0.0751288	0.0523975	0.065241	0.0766158	0.086148	0.0730785	0.0480117		0.0202742	0.0720826	0.028045	0.0320326	0.0561645	0.0601102	0.0440686	0.0975679		0.0121258	0.00401013	0.00399841	0.00813387	0.0040002	0.00403074	0.0081228	0.0159897
		0.5505		0.0616167	0.0750757	0.0523917	0.065202	0.0764994	0.0860963	0.073054	0.0479914		0.0202621	0.0720788	0.0280331	0.0320236	0.0561497	0.0601092	0.0440659	0.0974685		0.0121246	0.00400937	0.00399809	0.00813364	0.00400019	0.00402945	0.00812157	0.0159899
		0.551		0.0615751	0.0750212	0.052386	0.0651638	0.076384	0.0860444	0.0730292	0.0479712		0.0202503	0.0720751	0.0280217	0.0320149	0.0561355	0.0601082	0.0440632	0.0973713		0.0121232	0.00400864	0.00399779	0.00813329	0.00400019	0.00402819	0.00812028	0.01599
		0.5515		0.0615338	0.0749654	0.0523805	0.0651266	0.0762696	0.0859924	0.0730041	0.047951		0.0202388	0.0720716	0.0280107	0.0320066	0.0561217	0.0601071	0.0440606	0.0972763		0.0121218	0.00400793	0.0039975	0.00813283	0.00400019	0.00402696	0.00811893	0.0159901
		0.552		0.0614928	0.0749082	0.0523752	0.0650903	0.0761562	0.0859401	0.0729786	0.0479308		0.0202275	0.0720682	0.0280002	0.0319986	0.0561085	0.060106	0.044058	0.0971836		0.0121204	0.00400724	0.00399723	0.00813227	0.00400018	0.00402576	0.00811752	0.0159903
		0.5525		0.0614522	0.0748495	0.0523699	0.0650549	0.076044	0.0858876	0.0729527	0.0479106		0.0202165	0.072065	0.0279902	0.031991	0.0560957	0.0601048	0.0440554	0.097093		0.0121189	0.00400657	0.00399698	0.0081316	0.00400018	0.00402458	0.00811606	0.0159904
		0.553		0.061412	0.0747894	0.0523646	0.0650203	0.0759329	0.085835	0.0729263	0.0478904		0.0202057	0.0720619	0.0279806	0.0319838	0.0560834	0.0601035	0.0440529	0.0970046		0.0121173	0.00400593	0.00399673	0.00813083	0.00400018	0.00402343	0.00811455	0.0159906
		0.5535		0.0613722	0.0747279	0.0523594	0.0649866	0.0758231	0.0857822	0.0728995	0.0478701		0.0201953	0.0720589	0.0279714	0.0319769	0.0560716	0.0601022	0.0440504	0.0969183		0.0121157	0.00400531	0.0039965	0.00812997	0.00400017	0.00402231	0.008113	0.0159907
		0.554		0.0613328	0.074665	0.0523542	0.0649538	0.0757145	0.0857292	0.0728721	0.0478498		0.020185	0.072056	0.0279626	0.0319702	0.0560602	0.0601008	0.044048	0.096834		0.0121141	0.00400471	0.00399629	0.00812902	0.00400017	0.00402121	0.00811141	0.0159909
		0.5545		0.0612939	0.0746006	0.052349	0.0649217	0.0756073	0.085676	0.0728442	0.0478294		0.0201751	0.0720533	0.0279543	0.031964	0.0560493	0.0600994	0.0440456	0.0967517		0.0121124	0.00400413	0.00399608	0.00812799	0.00400017	0.00402015	0.00810977	0.015991
		0.555		0.0612554	0.0745348	0.0523437	0.0648904	0.0755013	0.0856227	0.0728156	0.047809		0.0201654	0.0720507	0.0279463	0.031958	0.0560388	0.0600979	0.0440432	0.0966714		0.0121107	0.00400358	0.00399589	0.00812688	0.00400016	0.0040191	0.00810811	0.0159912
		0.5555		0.0612174	0.0744675	0.0523384	0.0648599	0.0753968	0.0855692	0.0727865	0.0477884		0.0201559	0.0720483	0.0279388	0.0319523	0.0560288	0.0600964	0.0440409	0.0965929		0.0121089	0.00400304	0.00399572	0.00812569	0.00400016	0.00401809	0.00810641	0.0159913
		0.556		0.0611799	0.0743988	0.052333	0.0648301	0.0752937	0.0855155	0.0727566	0.0477677		0.0201467	0.072046	0.0279316	0.0319469	0.0560192	0.0600948	0.0440386	0.0965164		0.0121072	0.00400253	0.00399555	0.00812444	0.00400016	0.0040171	0.00810468	0.0159915
		0.5565		0.061143	0.0743286	0.0523274	0.0648011	0.075192	0.0854616	0.0727261	0.0477469		0.0201378	0.0720438	0.0279248	0.0319418	0.05601	0.0600932	0.0440364	0.0964417		0.0121054	0.00400203	0.00399539	0.00812312	0.00400015	0.00401614	0.00810292	0.0159916
		0.557		0.0611065	0.074257	0.0523217	0.0647727	0.0750918	0.0854075	0.0726947	0.047726		0.0201291	0.0720417	0.0279184	0.031937	0.0560013	0.0600916	0.0440342	0.0963687		0.0121035	0.00400156	0.00399525	0.00812173	0.00400015	0.00401521	0.00810115	0.0159918
		0.5575		0.0610707	0.0741839	0.0523158	0.064745	0.074993	0.0853533	0.0726626	0.0477049		0.0201206	0.0720398	0.0279123	0.0319324	0.0559929	0.06009	0.044032	0.0962975		0.0121017	0.0040011	0.00399512	0.00812029	0.00400014	0.0040143	0.00809935	0.015992
		0.558		0.0610353	0.0741094	0.0523098	0.064718	0.0748958	0.0852988	0.0726296	0.0476836		0.0201124	0.0720379	0.0279065	0.0319281	0.0559849	0.0600883	0.0440299	0.0962279		0.0120998	0.00400066	0.003995	0.0081188	0.00400014	0.00401341	0.00809753	0.0159921
		0.5585		0.0610006	0.0740334	0.0523035	0.0646916	0.0748	0.0852441	0.0725957	0.0476621		0.0201045	0.0720362	0.0279011	0.0319241	0.0559773	0.0600866	0.0440278	0.09616		0.0120979	0.00400024	0.00399488	0.00811726	0.00400014	0.00401256	0.0080957	0.0159923
		0.559		0.0609665	0.0739561	0.0522969	0.0646657	0.0747058	0.0851891	0.0725609	0.0476404		0.0200967	0.0720347	0.027896	0.0319203	0.0559701	0.0600849	0.0440258	0.0960937		0.012096	0.00399984	0.00399478	0.00811567	0.00400013	0.00401172	0.00809386	0.0159925
		0.5595		0.0609329	0.0738773	0.05229	0.0646404	0.0746131	0.0851339	0.0725251	0.0476185		0.0200892	0.0720332	0.0278912	0.0319167	0.0559633	0.0600832	0.0440238	0.0960288		0.0120941	0.00399946	0.00399469	0.00811404	0.00400013	0.00401092	0.008092	0.0159926
		0.56		0.0608999	0.0737971	0.0522828	0.0646157	0.0745219	0.0850784	0.0724883	0.0475963		0.020082	0.0720319	0.0278868	0.0319134	0.0559569	0.0600815	0.0440219	0.0959655		0.0120922	0.00399909	0.00399461	0.00811237	0.00400013	0.00401013	0.00809014	0.0159928
		0.5605		0.0608676	0.0737155	0.0522753	0.0645914	0.0744323	0.0850227	0.0724504	0.0475739		0.0200749	0.0720306	0.0278826	0.0319103	0.0559507	0.0600797	0.04402	0.0959036		0.0120903	0.00399874	0.00399453	0.00811066	0.00400012	0.00400937	0.00808827	0.015993
		0.561		0.0608359	0.0736325	0.0522674	0.0645676	0.0743443	0.0849666	0.0724113	0.0475513		0.0200681	0.0720295	0.0278787	0.0319074	0.055945	0.060078	0.0440181	0.0958432		0.0120884	0.00399841	0.00399446	0.00810892	0.00400012	0.00400864	0.0080864	0.0159931
		0.5615		0.0608048	0.0735482	0.052259	0.0645442	0.0742577	0.0849102	0.0723711	0.0475283		0.0200616	0.0720285	0.0278752	0.0319047	0.0559396	0.0600762	0.0440163	0.095784		0.0120864	0.00399809	0.00399441	0.00810715	0.00400012	0.00400793	0.00808452	0.0159933
		0.562		0.0607743	0.0734626	0.0522503	0.0645213	0.0741728	0.0848535	0.0723297	0.0475051		0.0200552	0.0720276	0.0278718	0.0319023	0.0559345	0.0600745	0.0440145	0.0957261		0.0120845	0.00399779	0.00399436	0.00810535	0.00400011	0.00400724	0.00808265	0.0159934
		0.5625		0.0607445	0.0733756	0.0522411	0.0644987	0.0740893	0.0847964	0.0722871	0.0474816		0.020049	0.0720269	0.0278688	0.0319	0.0559297	0.0600728	0.0440128	0.0956695		0.0120826	0.0039975	0.00399431	0.00810354	0.00400011	0.00400657	0.00808078	0.0159936
		0.563		0.0607153	0.0732873	0.0522313	0.0644765	0.0740074	0.084739	0.0722431	0.0474578		0.0200431	0.0720262	0.027866	0.031898	0.0559253	0.060071	0.0440111	0.0956141		0.0120807	0.00399723	0.00399428	0.0081017	0.0040001	0.00400593	0.00807891	0.0159938
		0.5635		0.0606867	0.0731978	0.0522211	0.0644546	0.073927	0.0846811	0.0721977	0.0474336		0.0200374	0.0720256	0.0278634	0.0318961	0.0559212	0.0600693	0.0440094	0.0955598		0.0120788	0.00399698	0.00399425	0.00809984	0.0040001	0.00400531	0.00807704	0.0159939
		0.564		0.0606588	0.0731071	0.0522102	0.0644329	0.0738481	0.0846228	0.072151	0.0474092		0.0200318	0.0720252	0.0278611	0.0318944	0.0559173	0.0600676	0.0440078	0.0955067		0.0120768	0.00399673	0.00399423	0.00809796	0.0040001	0.00400471	0.00807518	0.0159941
		0.5645		0.0606315	0.0730152	0.0521988	0.0644115	0.0737707	0.0845641	0.0721028	0.0473844		0.0200265	0.0720248	0.027859	0.0318929	0.0559138	0.0600659	0.0440062	0.0954545		0.0120749	0.0039965	0.00399421	0.00809607	0.00400009	0.00400413	0.00807333	0.0159943
		0.565		0.0606049	0.0729221	0.0521868	0.0643903	0.0736948	0.0845049	0.072053	0.0473592		0.0200214	0.0720245	0.0278572	0.0318915	0.0559106	0.0600642	0.0440047	0.0954034		0.012073	0.00399629	0.00399421	0.00809418	0.00400009	0.00400358	0.00807149	0.0159944
		0.5655		0.0605789	0.0728279	0.0521741	0.0643693	0.0736203	0.0844451	0.0720018	0.0473337		0.0200164	0.0720244	0.0278556	0.0318903	0.0559076	0.0600625	0.0440032	0.0953533		0.0120712	0.00399608	0.0039942	0.00809227	0.00400009	0.00400304	0.00806966	0.0159946
		0.566		0.0605536	0.0727326	0.0521607	0.0643484	0.0735473	0.0843849	0.0719489	0.0473078		0.0200117	0.0720243	0.0278541	0.0318893	0.0559049	0.0600609	0.0440018	0.0953041		0.0120693	0.00399589	0.00399421	0.00809036	0.00400008	0.00400253	0.00806785	0.0159947
		0.5665		0.0605289	0.0726363	0.0521466	0.0643276	0.0734757	0.0843241	0.0718943	0.0472816		0.0200071	0.0720243	0.0278529	0.0318884	0.0559025	0.0600592	0.0440004	0.0952557		0.0120674	0.00399572	0.00399421	0.00808844	0.00400008	0.00400203	0.00806604	0.0159949
		0.567		0.0605049	0.072539	0.0521317	0.0643069	0.0734054	0.0842628	0.0718381	0.047255		0.0200027	0.0720245	0.0278519	0.0318877	0.0559003	0.0600576	0.043999	0.0952082		0.0120656	0.00399555	0.00399423	0.00808652	0.00400008	0.00400156	0.00806425	0.015995
		0.5675		0.0604815	0.0724408	0.052116	0.0642862	0.0733366	0.0842008	0.0717801	0.047228		0.0199985	0.0720247	0.0278511	0.0318871	0.0558984	0.060056	0.0439977	0.0951615		0.0120638	0.00399539	0.00399425	0.0080846	0.00400007	0.0040011	0.00806248	0.0159952
		0.568		0.0604587	0.0723417	0.0520996	0.0642655	0.0732691	0.0841382	0.0717203	0.0472006		0.0199945	0.072025	0.0278504	0.0318866	0.0558968	0.0600545	0.0439964	0.0951155		0.0120619	0.00399525	0.00399427	0.00808269	0.00400007	0.00400066	0.00806072	0.0159953
		0.5685		0.0604366	0.0722417	0.0520822	0.0642448	0.073203	0.084075	0.0716586	0.0471729		0.0199906	0.0720254	0.0278499	0.0318862	0.0558953	0.0600529	0.0439952	0.0950702		0.0120602	0.00399512	0.0039943	0.00808077	0.00400007	0.00400024	0.00805898	0.0159955
		0.569		0.0604151	0.0721411	0.052064	0.0642239	0.0731381	0.0840111	0.0715951	0.0471447		0.0199869	0.0720258	0.0278496	0.031886	0.0558941	0.0600514	0.043994	0.0950256		0.0120584	0.003995	0.00399433	0.00807886	0.00400007	0.00399984	0.00805726	0.0159956
		0.5695		0.0603943	0.0720397	0.0520449	0.064203	0.0730745	0.0839464	0.0715296	0.0471161		0.0199834	0.0720264	0.0278495	0.0318859	0.0558932	0.06005	0.0439928	0.0949817		0.0120566	0.00399488	0.00399437	0.00807696	0.00400006	0.00399946	0.00805556	0.0159958
		0.57		0.0603741	0.0719378	0.0520248	0.0641819	0.0730122	0.0838811	0.0714621	0.0470872		0.01998	0.072027	0.0278495	0.0318859	0.0558924	0.0600485	0.0439917	0.0949382		0.0120549	0.00399478	0.00399441	0.00807507	0.00400006	0.00399909	0.00805388	0.0159959
		0.5705		0.0603545	0.0718352	0.0520038	0.0641606	0.0729511	0.083815	0.0713925	0.0470578		0.0199767	0.0720277	0.0278496	0.031886	0.0558919	0.0600471	0.0439906	0.0948954		0.0120532	0.00399469	0.00399445	0.00807319	0.00400006	0.00399874	0.00805222	0.0159961
		0.571		0.0603355	0.0717322	0.0519817	0.0641391	0.0728911	0.0837481	0.0713209	0.0470281		0.0199737	0.0720285	0.0278499	0.0318862	0.0558916	0.0600458	0.0439895	0.0948531		0.0120515	0.00399461	0.0039945	0.00807131	0.00400005	0.00399841	0.00805059	0.0159962
		0.5715		0.0603171	0.0716288	0.0519586	0.0641173	0.0728323	0.0836804	0.0712471	0.0469979		0.0199707	0.0720294	0.0278504	0.0318865	0.0558914	0.0600444	0.0439885	0.0948112		0.0120498	0.00399453	0.00399455	0.00806945	0.00400005	0.00399809	0.00804897	0.0159963
		0.572		0.0602994	0.0715249	0.0519344	0.0640952	0.0727746	0.0836118	0.0711712	0.0469674		0.019968	0.0720303	0.027851	0.031887	0.0558915	0.0600431	0.0439875	0.0947698		0.0120482	0.00399446	0.0039946	0.00806761	0.00400005	0.00399779	0.00804738	0.0159965
		0.5725		0.0602822	0.0714208	0.0519091	0.0640727	0.072718	0.0835424	0.071093	0.0469364		0.0199653	0.0720313	0.0278517	0.0318874	0.0558917	0.0600419	0.0439866	0.0947287		0.0120465	0.00399441	0.00399466	0.00806578	0.00400005	0.0039975	0.00804581	0.0159966
		0.573		0.0602657	0.0713163	0.0518826	0.0640499	0.0726624	0.0834721	0.0710125	0.0469051		0.0199628	0.0720324	0.0278525	0.031888	0.0558922	0.0600407	0.0439857	0.0946881		0.0120449	0.00399436	0.00399472	0.00806396	0.00400004	0.00399723	0.00804426	0.0159967
		0.5735		0.0602497	0.0712117	0.051855	0.0640267	0.0726079	0.0834009	0.0709298	0.0468734		0.0199604	0.0720336	0.0278534	0.0318887	0.0558928	0.0600395	0.0439849	0.0946478		0.0120434	0.00399431	0.00399478	0.00806216	0.00400004	0.00399698	0.00804274	0.0159968
		0.574		0.0602343	0.0711068	0.0518261	0.0640029	0.0725543	0.0833287	0.0708447	0.0468413		0.0199582	0.0720348	0.0278545	0.0318894	0.0558936	0.0600384	0.043984	0.0946078		0.0120418	0.00399428	0.00399484	0.00806038	0.00400004	0.00399673	0.00804125	0.015997
		0.5745		0.0602195	0.0710018	0.051796	0.0639787	0.0725016	0.0832556	0.0707572	0.0468088		0.019956	0.072036	0.0278556	0.0318902	0.0558945	0.0600373	0.0439833	0.0945681		0.0120403	0.00399425	0.00399491	0.00805862	0.00400004	0.0039965	0.00803978	0.0159971
		0.575		0.0602053	0.0708966	0.0517646	0.063954	0.0724499	0.0831815	0.0706672	0.046776		0.019954	0.0720373	0.0278569	0.0318911	0.0558956	0.0600363	0.0439825	0.0945287		0.0120388	0.00399423	0.00399498	0.00805688	0.00400003	0.00399629	0.00803833	0.0159972
		0.5755		0.0601916	0.0707914	0.0517319	0.0639287	0.072399	0.0831064	0.0705748	0.0467428		0.0199521	0.0720387	0.0278583	0.031892	0.0558969	0.0600354	0.0439818	0.0944895		0.0120373	0.00399421	0.00399505	0.00805516	0.00400003	0.00399608	0.00803691	0.0159973
		0.576		0.0601785	0.070686	0.0516979	0.0639027	0.072349	0.0830302	0.0704798	0.0467093		0.0199504	0.0720402	0.0278597	0.031893	0.0558983	0.0600344	0.0439812	0.0944505		0.0120358	0.00399421	0.00399512	0.00805346	0.00400003	0.00399589	0.00803552	0.0159975
		0.5765		0.060166	0.0705807	0.0516625	0.0638761	0.0722997	0.082953	0.0703824	0.0466755		0.0199487	0.0720416	0.0278613	0.0318941	0.0558999	0.0600336	0.0439805	0.0944117		0.0120344	0.0039942	0.00399519	0.00805178	0.00400003	0.00399572	0.00803415	0.0159976
		0.577		0.0601539	0.0704753	0.0516257	0.0638489	0.0722512	0.0828747	0.0702823	0.0466413		0.0199472	0.0720432	0.0278629	0.0318952	0.0559016	0.0600327	0.04398	0.0943731		0.012033	0.00399421	0.00399527	0.00805013	0.00400003	0.00399555	0.00803281	0.0159977
		0.5775		0.0601424	0.07037	0.0515875	0.0638209	0.0722033	0.0827954	0.0701796	0.0466068		0.0199457	0.0720448	0.0278646	0.0318963	0.0559034	0.060032	0.0439794	0.0943346		0.0120316	0.00399421	0.00399535	0.0080485	0.00400002	0.00399539	0.0080315	0.0159978
		0.578		0.0601315	0.0702647	0.0515477	0.0637921	0.0721562	0.0827149	0.0700743	0.046572		0.0199444	0.0720464	0.0278664	0.0318975	0.0559054	0.0600313	0.0439789	0.0942963		0.0120303	0.00399423	0.00399542	0.00804689	0.00400002	0.00399525	0.00803021	0.0159979
		0.5785		0.060121	0.0701594	0.0515065	0.0637625	0.0721097	0.0826333	0.0699663	0.046537		0.0199431	0.072048	0.0278682	0.0318988	0.0559075	0.0600306	0.0439784	0.094258		0.012029	0.00399425	0.0039955	0.00804531	0.00400002	0.00399512	0.00802895	0.015998
		0.579		0.0601111	0.0700542	0.0514638	0.0637321	0.0720637	0.0825505	0.0698555	0.0465017		0.019942	0.0720497	0.0278702	0.0319	0.0559097	0.06003	0.043978	0.0942199		0.0120277	0.00399427	0.00399558	0.00804375	0.00400002	0.003995	0.00802772	0.0159981
		0.5795		0.0601016	0.0699491	0.0514195	0.0637008	0.0720183	0.0824666	0.0697421	0.0464662		0.0199409	0.0720515	0.0278721	0.0319013	0.055912	0.0600295	0.0439776	0.0941819		0.0120264	0.0039943	0.00399566	0.00804222	0.00400002	0.00399488	0.00802651	0.0159982
		0.58		0.0600927	0.069844	0.0513737	0.0636686	0.0719734	0.0823816	0.0696259	0.0464304		0.0199399	0.0720532	0.0278742	0.0319027	0.0559145	0.060029	0.0439772	0.0941439		0.0120252	0.00399433	0.00399574	0.00804072	0.00400002	0.00399478	0.00802533	0.0159983
		0.5805		0.0600842	0.069739	0.0513262	0.0636354	0.071929	0.0822953	0.0695069	0.0463945		0.0199391	0.0720551	0.0278763	0.0319041	0.055917	0.0600286	0.0439769	0.094106		0.012024	0.00399437	0.00399582	0.00803924	0.00400001	0.00399469	0.00802418	0.0159984
		0.581		0.0600762	0.0696342	0.051277	0.0636012	0.0718851	0.0822079	0.0693851	0.0463584		0.0199383	0.0720569	0.0278785	0.0319055	0.0559197	0.0600282	0.0439767	0.0940681		0.0120228	0.00399441	0.00399591	0.00803779	0.00400001	0.00399461	0.00802305	0.0159985
		0.5815		0.0600686	0.0695294	0.0512263	0.063566	0.0718415	0.0821193	0.0692606	0.0463222		0.0199375	0.0720587	0.0278807	0.0319069	0.0559224	0.0600279	0.0439764	0.0940303		0.0120216	0.00399445	0.00399599	0.00803636	0.00400001	0.00399453	0.00802195	0.0159986
		0.582		0.0600616	0.0694248	0.0511738	0.0635298	0.0717982	0.0820295	0.0691332	0.0462858		0.0199369	0.0720606	0.0278829	0.0319084	0.0559253	0.0600276	0.0439762	0.0939926		0.0120205	0.0039945	0.00399607	0.00803496	0.00400001	0.00399446	0.00802088	0.0159987
		0.5825		0.0600549	0.0693202	0.0511196	0.0634924	0.0717553	0.0819384	0.0690029	0.0462494		0.0199363	0.0720625	0.0278853	0.0319098	0.0559282	0.0600275	0.0439761	0.0939548		0.0120194	0.00399455	0.00399615	0.00803359	0.00400001	0.00399441	0.00801983	0.0159988
		0.583		0.0600487	0.0692158	0.0510636	0.0634539	0.0717126	0.0818462	0.0688698	0.0462129		0.0199358	0.0720644	0.0278876	0.0319113	0.0559313	0.0600273	0.0439759	0.0939172		0.0120183	0.0039946	0.00399624	0.00803224	0.00400001	0.00399436	0.00801881	0.0159989
		0.5835		0.060043	0.0691114	0.0510059	0.0634143	0.0716702	0.0817527	0.0687339	0.0461764		0.0199354	0.0720663	0.02789	0.0319128	0.0559344	0.0600273	0.0439759	0.0938796		0.0120172	0.00399466	0.00399632	0.00803092	0.00400001	0.00399431	0.00801781	0.0159989
		0.584		0.0600376	0.0690072	0.0509464	0.0633734	0.0716279	0.0816581	0.0685951	0.04614		0.019935	0.0720682	0.0278924	0.0319143	0.0559376	0.0600273	0.0439758	0.093842		0.0120162	0.00399472	0.0039964	0.00802963	0.004	0.00399428	0.00801685	0.015999
		0.5845		0.0600327	0.0689031	0.0508851	0.0633314	0.0715859	0.0815622	0.0684535	0.0461035		0.0199347	0.0720702	0.0278949	0.0319159	0.0559408	0.0600274	0.0439758	0.0938045		0.0120152	0.00399478	0.00399649	0.00802837	0.004	0.00399425	0.00801591	0.0159991
		0.585		0.0600281	0.068799	0.0508219	0.063288	0.0715439	0.0814652	0.068309	0.0460672		0.0199345	0.0720721	0.0278974	0.0319174	0.0559442	0.0600275	0.0439759	0.0937671		0.0120142	0.00399484	0.00399657	0.00802713	0.004	0.00399423	0.00801499	0.0159992
		0.5855		0.060024	0.0686951	0.0507569	0.0632434	0.071502	0.0813669	0.0681616	0.0460309		0.0199343	0.072074	0.0278999	0.031919	0.0559476	0.0600277	0.043976	0.0937297		0.0120133	0.00399491	0.00399665	0.00802593	0.004	0.00399421	0.0080141	0.0159993
		0.586		0.0600202	0.0685912	0.05069	0.0631974	0.0714601	0.0812675	0.0680115	0.0459948		0.0199342	0.072076	0.0279025	0.0319205	0.0559511	0.060028	0.0439761	0.0936924		0.0120123	0.00399498	0.00399673	0.00802475	0.004	0.00399421	0.00801323	0.0159993
		0.5865		0.0600168	0.0684875	0.0506213	0.0631501	0.0714183	0.0811669	0.0678585	0.0459589		0.0199342	0.0720779	0.0279051	0.0319221	0.0559546	0.0600283	0.0439763	0.0936552		0.0120114	0.00399505	0.00399681	0.00802359	0.004	0.0039942	0.00801239	0.0159994
		0.587		0.0600138	0.0683838	0.0505506	0.0631013	0.0713764	0.0810652	0.0677027	0.0459232		0.0199341	0.0720798	0.0279077	0.0319236	0.0559582	0.0600287	0.0439765	0.0936182		0.0120105	0.00399512	0.0039969	0.00802247	0.004	0.00399421	0.00801157	0.0159995
		0.5875		0.0600111	0.0682801	0.050478	0.0630512	0.0713345	0.0809623	0.0675441	0.0458877		0.0199342	0.0720817	0.0279104	0.0319252	0.0559618	0.0600292	0.0439768	0.0935813		0.0120097	0.00399519	0.00399698	0.00802137	0.004	0.00399421	0.00801078	0.0159995
		0.588		0.0600088	0.0681766	0.0504035	0.0629996	0.0712924	0.0808583	0.0673828	0.0458525		0.0199343	0.0720836	0.027913	0.0319267	0.0559655	0.0600297	0.0439771	0.0935445		0.0120088	0.00399527	0.00399706	0.0080203	0.004	0.00399423	0.00801001	0.0159996
		0.5885		0.0600068	0.0680731	0.050327	0.0629465	0.0712502	0.0807533	0.0672188	0.0458175		0.0199344	0.0720854	0.0279157	0.0319283	0.0559693	0.0600303	0.0439774	0.093508		0.012008	0.00399535	0.00399714	0.00801925	0.004	0.00399425	0.00800927	0.0159997
		0.589		0.0600051	0.0679696	0.0502486	0.062892	0.0712078	0.0806472	0.0670521	0.0457828		0.0199346	0.0720872	0.0279184	0.0319298	0.0559731	0.060031	0.0439778	0.0934716		0.0120072	0.00399542	0.00399721	0.00801823	0.004	0.00399427	0.00800855	0.0159997
		0.5895		0.0600037	0.0678661	0.0501682	0.0628359	0.0711653	0.08054	0.0668828	0.0457483		0.0199348	0.072089	0.0279211	0.0319313	0.0559769	0.0600318	0.0439783	0.0934355		0.0120065	0.0039955	0.00399729	0.00801724	0.004	0.0039943	0.00800785	0.0159998
		0.59		0.0600027	0.0677627	0.0500858	0.0627782	0.0711225	0.0804319	0.0667108	0.0457143		0.0199351	0.0720908	0.0279239	0.0319329	0.0559808	0.0600326	0.0439788	0.0933997		0.0120057	0.00399558	0.00399737	0.00801628	0.004	0.00399433	0.00800717	0.0159998
		0.5905		0.0600019	0.0676593	0.0500015	0.062719	0.0710794	0.0803229	0.0665364	0.0456805		0.0199354	0.0720925	0.0279266	0.0319344	0.0559847	0.0600335	0.0439793	0.0933641		0.012005	0.00399566	0.00399745	0.00801534	0.00399999	0.00399437	0.00800652	0.0159999
		0.591		0.0600015	0.0675559	0.0499152	0.0626582	0.071036	0.0802129	0.0663594	0.0456471		0.0199358	0.0720942	0.0279294	0.0319359	0.0559887	0.0600344	0.0439799	0.0933289		0.0120043	0.00399574	0.00399752	0.00801443	0.00399999	0.00399441	0.00800589	0.016
		0.5915		0.0600013	0.0674525	0.0498269	0.0625958	0.0709923	0.080102	0.06618	0.045614		0.0199362	0.0720958	0.0279322	0.0319374	0.0559926	0.0600355	0.0439805	0.0932939		0.0120036	0.00399582	0.0039976	0.00801354	0.00399999	0.00399445	0.00800528	0.016
		0.592		0.0600014	0.0673491	0.0497366	0.0625317	0.0709482	0.0799904	0.0659982	0.0455813		0.0199366	0.0720973	0.0279349	0.0319389	0.0559966	0.0600366	0.0439812	0.0932594		0.0120029	0.00399591	0.00399767	0.00801268	0.00399999	0.0039945	0.00800469	0.0160001
		0.5925		0.0600017	0.0672457	0.0496443	0.062466	0.0709038	0.0798779	0.0658141	0.0455489		0.019937	0.0720989	0.0279377	0.0319404	0.0560006	0.0600377	0.0439819	0.0932252		0.0120023	0.00399599	0.00399774	0.00801184	0.00399999	0.00399455	0.00800412	0.0160001
		0.593		0.0600023	0.0671423	0.0495501	0.0623986	0.0708589	0.0797648	0.0656278	0.0455169		0.0199375	0.0721003	0.0279406	0.0319418	0.0560047	0.060039	0.0439827	0.0931915		0.0120017	0.00399607	0.00399781	0.00801103	0.00399999	0.0039946	0.00800358	0.0160002
		0.5935		0.0600032	0.0670388	0.0494539	0.0623296	0.0708136	0.079651	0.0654394	0.0454853		0.0199381	0.0721017	0.0279434	0.0319433	0.0560087	0.0600403	0.0439836	0.0931581		0.0120011	0.00399615	0.00399788	0.00801024	0.00399999	0.00399466	0.00800305	0.0160002
		0.594		0.0600042	0.0669353	0.0493557	0.0622588	0.0707679	0.0795366	0.0652488	0.0454541		0.0199386	0.072103	0.0279462	0.0319447	0.0560128	0.0600417	0.0439845	0.0931252		0.0120005	0.00399624	0.00399796	0.00800948	0.00399999	0.00399472	0.00800255	0.0160002
		0.5945		0.0600055	0.0668318	0.0492556	0.0621863	0.0707216	0.0794217	0.0650563	0.0454233		0.0199392	0.0721042	0.027949	0.0319461	0.0560169	0.0600432	0.0439854	0.0930928		0.0119999	0.00399632	0.00399802	0.00800874	0.00399999	0.00399478	0.00800206	0.0160003
		0.595		0.060007	0.0667283	0.0491535	0.0621121	0.0706748	0.0793064	0.0648617	0.0453928		0.0199398	0.0721054	0.0279519	0.0319475	0.056021	0.0600447	0.0439864	0.0930608		0.0119994	0.0039964	0.00399809	0.00800803	0.00399999	0.00399484	0.00800159	0.0160003
		0.5955		0.0600087	0.0666247	0.0490496	0.0620362	0.0706275	0.0791906	0.0646653	0.0453627		0.0199404	0.0721065	0.0279547	0.0319489	0.056025	0.0600463	0.0439874	0.0930293		0.0119989	0.00399649	0.00399816	0.00800734	0.00399999	0.00399491	0.00800114	0.0160004
		0.596		0.0600106	0.0665211	0.0489437	0.0619586	0.0705797	0.0790745	0.0644671	0.0453329		0.0199411	0.0721074	0.0279575	0.0319502	0.0560291	0.060048	0.0439885	0.0929983		0.0119984	0.00399657	0.00399822	0.00800667	0.00399999	0.00399498	0.00800071	0.0160004
		0.5965		0.0600127	0.0664174	0.048836	0.0618792	0.0705313	0.0789581	0.0642671	0.0453036		0.0199418	0.0721083	0.0279604	0.0319516	0.0560332	0.0600497	0.0439897	0.0929678		0.0119979	0.00399665	0.00399829	0.00800602	0.00399999	0.00399505	0.0080003	0.0160004
		0.597		0.060015	0.0663137	0.0487265	0.0617981	0.0704823	0.0788415	0.0640655	0.0452746		0.0199425	0.0721091	0.0279632	0.0319529	0.0560373	0.0600515	0.0439909	0.0929378		0.0119974	0.00399673	0.00399835	0.0080054	0.00399999	0.00399512	0.00799991	0.0160005
		0.5975		0.0600174	0.06621	0.0486151	0.0617152	0.0704327	0.0787247	0.0638622	0.0452459		0.0199432	0.0721097	0.0279661	0.0319542	0.0560413	0.0600534	0.0439922	0.0929083		0.0119969	0.00399681	0.00399841	0.0080048	0.004	0.00399519	0.00799953	0.0160005
		0.598		0.06002	0.0661063	0.0485019	0.0616306	0.0703825	0.0786078	0.0636573	0.0452176		0.019944	0.0721103	0.027969	0.0319555	0.0560454	0.0600554	0.0439935	0.0928794		0.0119965	0.0039969	0.00399847	0.00800422	0.004	0.00399527	0.00799917	0.0160005
		0.5985		0.0600227	0.0660025	0.048387	0.0615443	0.0703317	0.078491	0.063451	0.0451896		0.0199447	0.0721107	0.0279718	0.0319568	0.0560494	0.0600574	0.0439949	0.092851		0.0119961	0.00399698	0.00399853	0.00800366	0.004	0.00399535	0.00799883	0.0160006
		0.599		0.0600256	0.0658988	0.0482704	0.0614562	0.0702802	0.0783741	0.0632432	0.045162		0.0199455	0.072111	0.0279747	0.031958	0.0560534	0.0600595	0.0439964	0.0928231		0.0119957	0.00399706	0.00399859	0.00800312	0.004	0.00399542	0.0079985	0.0160006
		0.5995		0.0600286	0.065795	0.0481521	0.0613665	0.0702281	0.0782574	0.0630341	0.0451347		0.0199464	0.0721112	0.0279776	0.0319592	0.0560574	0.0600617	0.0439979	0.0927958		0.0119953	0.00399714	0.00399865	0.0080026	0.004	0.0039955	0.00799819	0.0160006
		0.6		0.0600317	0.0656913	0.0480322	0.061275	0.0701753	0.0781408	0.0628237	0.0451076		0.0199472	0.0721112	0.0279804	0.0319604	0.0560614	0.0600639	0.0439995	0.0927691		0.0119949	0.00399721	0.0039987	0.0080021	0.004	0.00399558	0.00799789	0.0160007
		0.6005		0.0600349	0.0655876	0.0479108	0.0611818	0.0701218	0.0780244	0.062612	0.0450809		0.019948	0.0721111	0.0279833	0.0319616	0.0560653	0.0600662	0.0440011	0.092743		0.0119945	0.00399729	0.00399876	0.00800162	0.004	0.00399566	0.00799761	0.0160007
		0.601		0.0600383	0.0654839	0.0477878	0.0610869	0.0700677	0.0779083	0.0623992	0.0450544		0.0199489	0.0721108	0.0279861	0.0319627	0.0560692	0.0600686	0.0440028	0.0927174		0.0119942	0.00399737	0.00399881	0.00800116	0.004	0.00399574	0.00799734	0.0160007
		0.6015		0.0600417	0.0653804	0.0476633	0.0609904	0.0700129	0.0777925	0.0621852	0.0450282		0.0199498	0.0721104	0.027989	0.0319639	0.0560731	0.0600711	0.0440046	0.0926923		0.0119938	0.00399745	0.00399887	0.00800072	0.004	0.00399582	0.00799709	0.0160007
		0.602		0.0600452	0.0652769	0.0475375	0.0608922	0.0699575	0.077677	0.0619703	0.0450022		0.0199507	0.0721098	0.0279919	0.031965	0.0560769	0.0600736	0.0440064	0.0926679		0.0119935	0.00399752	0.00399892	0.0080003	0.004	0.00399591	0.00799685	0.0160008
		0.6025		0.0600487	0.0651736	0.0474103	0.0607925	0.0699014	0.077562	0.0617544	0.0449764		0.0199516	0.0721091	0.0279947	0.0319661	0.0560807	0.0600761	0.0440083	0.092644		0.0119932	0.0039976	0.00399897	0.0079999	0.004	0.00399599	0.00799662	0.0160008
		0.603		0.0600524	0.0650704	0.0472819	0.0606911	0.0698446	0.0774474	0.0615376	0.0449508		0.0199526	0.0721081	0.0279976	0.0319671	0.0560844	0.0600788	0.0440103	0.0926208		0.0119929	0.00399767	0.00399902	0.00799951	0.004	0.00399607	0.00799641	0.0160008
		0.6035		0.060056	0.0649673	0.0471522	0.0605882	0.0697872	0.0773333	0.06132	0.0449254		0.0199536	0.072107	0.0280005	0.0319682	0.0560881	0.0600815	0.0440124	0.0925981		0.0119926	0.00399774	0.00399907	0.00799914	0.004	0.00399615	0.00799621	0.0160008
		0.604		0.0600597	0.0648645	0.0470215	0.0604838	0.0697291	0.0772197	0.0611017	0.0449002		0.0199545	0.0721057	0.0280033	0.0319692	0.0560917	0.0600843	0.0440145	0.0925759		0.0119924	0.00399781	0.00399911	0.00799879	0.00400001	0.00399624	0.00799602	0.0160008
		0.6045		0.0600635	0.064762	0.0468897	0.0603778	0.0696704	0.0771067	0.0608828	0.044875		0.0199555	0.0721042	0.0280062	0.0319702	0.0560952	0.0600871	0.0440166	0.0925544		0.0119921	0.00399788	0.00399916	0.00799845	0.00400001	0.00399632	0.00799584	0.0160009
		0.605		0.0600672	0.0646597	0.046757	0.0602705	0.069611	0.0769943	0.0606633	0.04485		0.0199565	0.0721025	0.028009	0.0319712	0.0560987	0.06009	0.0440189	0.0925334		0.0119919	0.00399796	0.0039992	0.00799813	0.00400001	0.0039964	0.00799568	0.0160009
		0.6055		0.060071	0.0645578	0.0466235	0.0601617	0.069551	0.0768826	0.0604434	0.0448251		0.0199576	0.0721006	0.0280119	0.0319721	0.0561021	0.0600929	0.0440212	0.092513		0.0119916	0.00399802	0.00399924	0.00799783	0.00400001	0.00399649	0.00799553	0.0160009
		0.606		0.0600748	0.0644562	0.0464892	0.0600515	0.0694903	0.0767715	0.0602231	0.0448003		0.0199586	0.0720985	0.0280148	0.0319731	0.0561055	0.0600959	0.0440236	0.0924932		0.0119914	0.00399809	0.00399929	0.00799754	0.00400001	0.00399657	0.00799539	0.0160009
		0.6065		0.0600786	0.064355	0.0463542	0.0599399	0.069429	0.0766612	0.0600025	0.0447754		0.0199597	0.0720961	0.0280176	0.031974	0.0561087	0.060099	0.0440261	0.092474		0.0119912	0.00399816	0.00399933	0.00799727	0.00400001	0.00399665	0.00799525	0.0160009
		0.607		0.0600823	0.0642544	0.0462186	0.0598271	0.0693671	0.0765517	0.0597817	0.0447506		0.0199607	0.0720935	0.0280204	0.0319749	0.0561119	0.0601021	0.0440286	0.0924553		0.011991	0.00399822	0.00399937	0.00799701	0.00400001	0.00399673	0.00799513	0.0160009
		0.6075		0.060086	0.0641542	0.0460825	0.0597129	0.0693045	0.0764429	0.0595608	0.0447258		0.0199618	0.0720906	0.0280233	0.0319758	0.056115	0.0601053	0.0440312	0.0924372		0.0119908	0.00399829	0.00399941	0.00799676	0.00400002	0.00399681	0.00799502	0.0160009
		0.608		0.0600897	0.0640547	0.0459461	0.0595975	0.0692413	0.076335	0.05934	0.0447009		0.0199629	0.0720875	0.0280261	0.0319766	0.0561179	0.0601085	0.0440339	0.0924196		0.0119906	0.00399835	0.00399944	0.00799653	0.00400002	0.0039969	0.00799492	0.0160009
		0.6085		0.0600933	0.0639557	0.0458093	0.0594808	0.0691774	0.0762279	0.0591192	0.044676		0.0199641	0.0720842	0.028029	0.0319774	0.0561208	0.0601117	0.0440367	0.0924026		0.0119904	0.00399841	0.00399948	0.00799631	0.00400002	0.00399698	0.00799483	0.016001
		0.609		0.0600969	0.0638574	0.0456723	0.059363	0.0691129	0.0761218	0.0588986	0.044651		0.0199652	0.0720806	0.0280318	0.0319783	0.0561236	0.0601151	0.0440396	0.0923862		0.0119903	0.00399847	0.00399952	0.00799611	0.00400002	0.00399706	0.00799475	0.016001
		0.6095		0.0601003	0.0637599	0.0455351	0.059244	0.0690476	0.0760166	0.0586783	0.0446258		0.0199664	0.0720767	0.0280346	0.0319791	0.0561263	0.0601184	0.0440425	0.0923703		0.0119901	0.00399853	0.00399955	0.00799592	0.00400002	0.00399714	0.00799467	0.016001
		0.61		0.0601037	0.063663	0.0453979	0.0591239	0.0689817	0.0759123	0.0584585	0.0446004		0.0199675	0.0720725	0.0280374	0.0319798	0.0561289	0.0601218	0.0440455	0.0923549		0.01199	0.00399859	0.00399958	0.00799574	0.00400002	0.00399721	0.00799461	0.016001
		0.6105		0.0601071	0.063567	0.0452608	0.0590027	0.0689152	0.075809	0.0582391	0.0445749		0.0199687	0.072068	0.0280403	0.0319806	0.0561313	0.0601253	0.0440486	0.0923401		0.0119898	0.00399865	0.00399961	0.00799557	0.00400003	0.00399729	0.00799455	0.016001
		0.611		0.0601103	0.0634719	0.0451238	0.0588804	0.0688479	0.0757068	0.0580203	0.0445491		0.01997	0.0720632	0.0280431	0.0319813	0.0561336	0.0601288	0.0440517	0.0923258		0.0119897	0.0039987	0.00399965	0.00799541	0.00400003	0.00399737	0.0079945	0.016001
		0.6115		0.0601133	0.0633776	0.0449869	0.0587571	0.0687799	0.0756057	0.0578021	0.0445231		0.0199712	0.0720582	0.0280459	0.031982	0.0561358	0.0601323	0.044055	0.092312		0.0119896	0.00399876	0.00399968	0.00799527	0.00400003	0.00399745	0.00799445	0.016001
		0.612		0.0601163	0.0632842	0.0448504	0.0586329	0.0687111	0.0755056	0.0575848	0.0444968		0.0199724	0.0720528	0.0280487	0.0319827	0.0561378	0.0601358	0.0440583	0.0922987		0.0119895	0.00399881	0.00399971	0.00799513	0.00400003	0.00399752	0.00799442	0.016001
		0.6125		0.0601191	0.0631918	0.0447142	0.0585077	0.0686416	0.0754066	0.0573684	0.0444702		0.0199737	0.0720471	0.0280514	0.0319834	0.0561397	0.0601394	0.0440617	0.092286		0.0119894	0.00399887	0.00399973	0.00799501	0.00400003	0.0039976	0.00799439	0.016001
		0.613		0.0601218	0.0631004	0.0445784	0.0583816	0.0685714	0.0753088	0.0571529	0.0444432		0.019975	0.072041	0.0280542	0.0319841	0.0561415	0.060143	0.0440651	0.0922737		0.0119893	0.00399892	0.00399976	0.0079949	0.00400004	0.00399767	0.00799437	0.016001
		0.6135		0.0601243	0.0630099	0.0444432	0.0582546	0.0685004	0.0752121	0.0569386	0.0444158		0.0199763	0.0720346	0.028057	0.0319848	0.0561431	0.0601466	0.0440687	0.0922619		0.0119892	0.00399897	0.00399979	0.00799479	0.00400004	0.00399774	0.00799435	0.016001
		0.614		0.0601266	0.0629205	0.0443086	0.0581269	0.0684286	0.0751166	0.0567255	0.044388		0.0199777	0.0720279	0.0280597	0.0319854	0.0561445	0.0601503	0.0440723	0.0922506		0.0119892	0.00399902	0.00399981	0.0079947	0.00400004	0.00399781	0.00799434	0.016001
		0.6145		0.0601288	0.0628321	0.0441746	0.0579983	0.068356	0.0750222	0.0565136	0.0443597		0.019979	0.0720208	0.0280625	0.031986	0.0561458	0.060154	0.0440761	0.0922398		0.0119891	0.00399907	0.00399984	0.00799461	0.00400004	0.00399788	0.00799434	0.016001
		0.615		0.0601307	0.0627448	0.0440413	0.0578691	0.0682826	0.074929	0.0563031	0.0443309		0.0199804	0.0720133	0.0280652	0.0319866	0.0561469	0.0601577	0.0440799	0.0922295		0.0119891	0.00399911	0.00399986	0.00799454	0.00400005	0.00399796	0.00799434	0.016001
		0.6155		0.0601325	0.0626585	0.0439088	0.0577391	0.0682084	0.074837	0.0560942	0.0443016		0.0199818	0.0720055	0.0280679	0.0319872	0.0561478	0.0601614	0.0440837	0.0922196		0.011989	0.00399916	0.00399988	0.00799447	0.00400005	0.00399802	0.00799435	0.016001
		0.616		0.060134	0.0625734	0.0437771	0.0576086	0.0681333	0.0747462	0.0558868	0.0442717		0.0199832	0.0719973	0.0280706	0.0319878	0.0561485	0.0601651	0.0440877	0.0922101		0.011989	0.0039992	0.0039999	0.00799441	0.00400005	0.00399809	0.00799436	0.016001
		0.6165		0.0601353	0.0624893	0.0436463	0.0574775	0.0680573	0.0746565	0.0556811	0.0442413		0.0199847	0.0719887	0.0280733	0.0319884	0.056149	0.0601688	0.0440918	0.0922011		0.0119889	0.00399924	0.00399992	0.00799436	0.00400005	0.00399816	0.00799438	0.0160009
		0.617		0.0601363	0.0624063	0.0435164	0.0573459	0.0679804	0.0745681	0.0554771	0.0442101		0.0199861	0.0719797	0.028076	0.0319889	0.0561493	0.0601725	0.0440959	0.0921925		0.0119889	0.00399929	0.00399995	0.00799432	0.00400006	0.00399822	0.0079944	0.0160009
		0.6175		0.0601371	0.0623244	0.0433875	0.0572138	0.0679026	0.0744807	0.055275	0.0441783		0.0199876	0.0719702	0.0280786	0.0319895	0.0561494	0.0601762	0.0441001	0.0921844		0.0119889	0.00399933	0.00399996	0.00799428	0.00400006	0.00399829	0.00799443	0.0160009
		0.618		0.0601376	0.0622435	0.0432596	0.0570813	0.0678239	0.0743946	0.0550749	0.0441458		0.0199892	0.0719604	0.0280813	0.03199	0.0561493	0.0601799	0.0441044	0.0921766		0.0119889	0.00399937	0.00399998	0.00799425	0.00400006	0.00399835	0.00799446	0.0160009
		0.6185		0.0601379	0.0621638	0.0431327	0.0569485	0.0677443	0.0743096	0.0548769	0.0441125		0.0199907	0.0719501	0.0280839	0.0319905	0.056149	0.0601835	0.0441087	0.0921693		0.0119889	0.00399941	0.004	0.00799423	0.00400007	0.00399841	0.0079945	0.0160009
		0.619		0.0601378	0.0620852	0.0430069	0.0568154	0.0676637	0.0742257	0.054681	0.0440785		0.0199923	0.0719394	0.0280865	0.031991	0.0561484	0.0601872	0.0441132	0.0921623		0.0119889	0.00399944	0.00400002	0.00799421	0.00400007	0.00399847	0.00799453	0.0160009
		0.6195		0.0601374	0.0620076	0.0428822	0.0566822	0.0675821	0.0741429	0.0544873	0.0440436		0.0199939	0.0719283	0.028089	0.0319915	0.0561476	0.0601908	0.0441177	0.0921557		0.0119889	0.00399948	0.00400003	0.0079942	0.00400007	0.00399853	0.00799458	0.0160009
		0.62		0.0601367	0.0619312	0.0427586	0.0565488	0.0674996	0.0740613	0.054296	0.0440078		0.0199955	0.0719167	0.0280916	0.031992	0.0561465	0.0601944	0.0441223	0.0921495		0.0119889	0.00399952	0.00400005	0.0079942	0.00400007	0.00399859	0.00799462	0.0160009
		0.6205		0.0601357	0.0618558	0.0426361	0.0564153	0.067416	0.0739806	0.0541071	0.0439711		0.0199972	0.0719046	0.0280941	0.0319925	0.0561452	0.060198	0.0441269	0.0921436		0.011989	0.00399955	0.00400006	0.0079942	0.00400008	0.00399865	0.00799467	0.0160008
		0.621		0.0601343	0.0617814	0.0425149	0.0562818	0.0673314	0.0739011	0.0539207	0.0439335		0.0199989	0.0718921	0.0280966	0.031993	0.0561436	0.0602015	0.0441317	0.0921381		0.011989	0.00399958	0.00400008	0.00799421	0.00400008	0.0039987	0.00799472	0.0160008
		0.6215		0.0601325	0.0617081	0.0423948	0.0561484	0.0672457	0.0738226	0.0537369	0.0438949		0.0200006	0.0718791	0.028099	0.0319935	0.0561418	0.060205	0.0441365	0.0921329		0.0119891	0.00399961	0.00400009	0.00799422	0.00400008	0.00399876	0.00799478	0.0160008
		0.622		0.0601304	0.0616358	0.0422759	0.0560151	0.067159	0.073745	0.0535557	0.0438553		0.0200024	0.0718656	0.0281015	0.0319939	0.0561396	0.0602084	0.0441414	0.092128		0.0119891	0.00399965	0.0040001	0.00799424	0.00400009	0.00399881	0.00799483	0.0160008
		0.6225		0.0601279	0.0615645	0.0421583	0.055882	0.0670712	0.0736685	0.0533771	0.0438147		0.0200042	0.0718516	0.0281039	0.0319944	0.0561372	0.0602118	0.0441463	0.0921235		0.0119892	0.00399968	0.00400012	0.00799427	0.00400009	0.00399887	0.00799489	0.0160008
		0.623		0.060125	0.0614942	0.0420419	0.0557491	0.0669824	0.0735928	0.0532014	0.0437729		0.020006	0.0718371	0.0281062	0.0319949	0.0561344	0.0602151	0.0441513	0.0921192		0.0119892	0.00399971	0.00400013	0.00799429	0.00400009	0.00399892	0.00799496	0.0160007
		0.6235		0.0601216	0.0614248	0.0419267	0.0556165	0.0668924	0.0735181	0.0530284	0.04373		0.0200079	0.0718221	0.0281085	0.0319953	0.0561314	0.0602183	0.0441564	0.0921153		0.0119893	0.00399973	0.00400014	0.00799432	0.0040001	0.00399897	0.00799502	0.0160007
		0.624		0.0601179	0.0613564	0.0418128	0.0554842	0.0668014	0.0734443	0.0528582	0.043686		0.0200098	0.0718066	0.0281108	0.0319958	0.056128	0.0602214	0.0441616	0.0921116		0.0119894	0.00399976	0.00400015	0.00799436	0.0040001	0.00399902	0.00799509	0.0160007
		0.6245		0.0601136	0.0612889	0.0417002	0.0553523	0.0667092	0.0733713	0.052691	0.0436407		0.0200117	0.0717906	0.028113	0.0319962	0.0561243	0.0602245	0.0441668	0.0921082		0.0119895	0.00399979	0.00400016	0.0079944	0.0040001	0.00399907	0.00799516	0.0160007
		0.625		0.060109	0.0612224	0.0415888	0.0552208	0.0666159	0.0732991	0.0525266	0.0435942		0.0200137	0.071774	0.0281152	0.0319967	0.0561203	0.0602275	0.044172	0.092105		0.0119896	0.00399981	0.00400017	0.00799444	0.00400011	0.00399911	0.00799522	0.0160006
		0.6255		0.0601038	0.0611566	0.0414786	0.0550897	0.0665215	0.0732276	0.0523652	0.0435465		0.0200157	0.0717569	0.0281173	0.0319971	0.0561159	0.0602304	0.0441774	0.0921021		0.0119897	0.00399984	0.00400017	0.00799449	0.00400011	0.00399916	0.0079953	0.0160006
		0.626		0.0600981	0.0610918	0.0413698	0.0549591	0.0664259	0.0731569	0.0522067	0.0434974		0.0200177	0.0717393	0.0281194	0.0319976	0.0561111	0.0602331	0.0441828	0.0920994		0.0119898	0.00399986	0.00400018	0.00799454	0.00400012	0.0039992	0.00799537	0.0160006
		0.6265		0.060092	0.0610277	0.0412621	0.0548291	0.0663292	0.0730869	0.0520512	0.043447		0.0200198	0.0717211	0.0281214	0.031998	0.056106	0.0602358	0.0441882	0.0920969		0.01199	0.00399988	0.00400019	0.0079946	0.00400012	0.00399924	0.00799544	0.0160006
		0.627		0.0600853	0.0609644	0.0411558	0.0546996	0.0662313	0.0730175	0.0518987	0.0433952		0.0200219	0.0717023	0.0281234	0.0319984	0.0561005	0.0602383	0.0441937	0.0920946		0.0119901	0.0039999	0.0040002	0.00799465	0.00400012	0.00399929	0.00799552	0.0160005
		0.6275		0.0600781	0.0609019	0.0410507	0.0545706	0.0661323	0.0729487	0.0517492	0.043342		0.0200241	0.071683	0.0281253	0.0319989	0.0560946	0.0602407	0.0441992	0.0920925		0.0119903	0.00399992	0.0040002	0.00799471	0.00400013	0.00399933	0.00799559	0.0160005
		0.628		0.0600703	0.0608401	0.0409469	0.0544423	0.0660321	0.0728805	0.0516028	0.0432873		0.0200263	0.0716631	0.0281271	0.0319994	0.0560883	0.060243	0.0442048	0.0920906		0.0119904	0.00399995	0.00400021	0.00799477	0.00400013	0.00399937	0.00799567	0.0160005
		0.6285		0.060062	0.060779	0.0408443	0.0543145	0.0659308	0.0728128	0.0514594	0.0432311		0.0200285	0.0716426	0.0281289	0.0319998	0.0560816	0.0602451	0.0442104	0.0920889		0.0119906	0.00399996	0.00400021	0.00799484	0.00400013	0.00399941	0.00799575	0.0160004
		0.629		0.0600531	0.0607186	0.0407429	0.0541874	0.0658284	0.0727455	0.051319	0.0431735		0.0200308	0.0716216	0.0281306	0.0320003	0.0560745	0.060247	0.044216	0.0920873		0.0119908	0.00399998	0.00400022	0.00799491	0.00400014	0.00399944	0.00799583	0.0160004
		0.6295		0.0600436	0.0606588	0.0406428	0.054061	0.0657248	0.0726787	0.0511816	0.0431143		0.0200331	0.0715999	0.0281322	0.0320007	0.056067	0.0602488	0.0442217	0.0920859		0.0119909	0.004	0.00400022	0.00799497	0.00400014	0.00399948	0.00799591	0.0160003
		0.63		0.0600334	0.0605995	0.0405439	0.0539352	0.06562	0.0726123	0.0510472	0.0430535		0.0200355	0.0715777	0.0281337	0.0320012	0.056059	0.0602504	0.0442274	0.0920846		0.0119911	0.00400002	0.00400023	0.00799504	0.00400014	0.00399952	0.00799599	0.0160003
		0.6305		0.0600227	0.0605409	0.0404462	0.05381	0.0655142	0.0725462	0.0509159	0.0429911		0.0200379	0.0715549	0.0281352	0.0320017	0.0560506	0.0602518	0.0442331	0.0920834		0.0119913	0.00400003	0.00400023	0.00799512	0.00400015	0.00399955	0.00799607	0.0160003
		0.631		0.0600113	0.0604827	0.0403497	0.0536856	0.0654072	0.0724803	0.0507876	0.0429271		0.0200403	0.0715315	0.0281366	0.0320022	0.0560417	0.0602531	0.0442389	0.0920823		0.0119916	0.00400005	0.00400024	0.00799519	0.00400015	0.00399958	0.00799615	0.0160002
		0.6315		0.0599992	0.0604251	0.0402545	0.0535618	0.0652992	0.0724147	0.0506622	0.0428614		0.0200428	0.0715075	0.0281378	0.0320027	0.0560324	0.0602541	0.0442447	0.0920813		0.0119918	0.00400006	0.00400024	0.00799527	0.00400016	0.00399961	0.00799623	0.0160002
		0.632		0.0599865	0.0603678	0.0401604	0.0534387	0.0651901	0.0723493	0.0505398	0.042794		0.0200453	0.0714829	0.028139	0.0320032	0.0560225	0.0602549	0.0442504	0.0920803		0.011992	0.00400008	0.00400024	0.00799534	0.00400016	0.00399965	0.00799631	0.0160001
		0.6325		0.0599731	0.060311	0.0400675	0.0533163	0.0650799	0.072284	0.0504204	0.0427249		0.0200479	0.0714576	0.0281401	0.0320037	0.0560122	0.0602555	0.0442562	0.0920795		0.0119923	0.00400009	0.00400024	0.00799542	0.00400016	0.00399968	0.00799639	0.0160001
		0.633		0.059959	0.0602546	0.0399757	0.0531947	0.0649687	0.0722188	0.0503039	0.0426541		0.0200505	0.0714318	0.0281411	0.0320042	0.0560013	0.0602558	0.044262	0.0920787		0.0119925	0.0040001	0.00400024	0.0079955	0.00400017	0.00399971	0.00799647	0.016
		0.6335		0.0599441	0.0601985	0.0398852	0.0530737	0.0648564	0.0721537	0.0501903	0.0425815		0.0200532	0.0714054	0.028142	0.0320047	0.05599	0.0602559	0.0442677	0.0920779		0.0119928	0.00400012	0.00400025	0.00799558	0.00400017	0.00399973	0.00799655	0.016
		0.634		0.0599286	0.0601427	0.0397957	0.0529534	0.0647432	0.0720885	0.0500796	0.0425071		0.0200559	0.0713784	0.0281427	0.0320053	0.0559781	0.0602557	0.0442735	0.0920771		0.0119931	0.00400013	0.00400025	0.00799566	0.00400017	0.00399976	0.00799664	0.0159999
		0.6345		0.0599122	0.0600872	0.0397074	0.0528338	0.0646291	0.0720233	0.0499718	0.0424309		0.0200587	0.0713507	0.0281433	0.0320058	0.0559657	0.0602553	0.0442792	0.0920764		0.0119934	0.00400014	0.00400025	0.00799575	0.00400018	0.00399979	0.00799671	0.0159999
		0.635		0.0598952	0.0600319	0.0396203	0.052715	0.064514	0.0719579	0.0498667	0.0423529		0.0200615	0.0713225	0.0281438	0.0320064	0.0559527	0.0602545	0.0442849	0.0920756		0.0119937	0.00400015	0.00400025	0.00799583	0.00400018	0.00399981	0.00799679	0.0159998
		0.6355		0.0598773	0.0599767	0.0395342	0.0525968	0.0643981	0.0718924	0.0497645	0.0422731		0.0200643	0.0712936	0.0281442	0.032007	0.0559392	0.0602535	0.0442906	0.0920749		0.0119941	0.00400016	0.00400025	0.00799591	0.00400018	0.00399984	0.00799688	0.0159997
		0.636		0.0598586	0.0599217	0.0394493	0.0524793	0.0642813	0.0718267	0.049665	0.0421913		0.0200672	0.0712641	0.0281445	0.0320076	0.0559251	0.0602522	0.0442962	0.0920741		0.0119944	0.00400017	0.00400025	0.007996	0.00400019	0.00399986	0.00799695	0.0159997
		0.6365		0.0598391	0.0598669	0.0393655	0.0523626	0.0641637	0.0717607	0.0495682	0.0421078		0.0200701	0.0712341	0.0281446	0.0320082	0.0559105	0.0602505	0.0443018	0.0920732		0.0119947	0.00400017	0.00400025	0.00799608	0.00400019	0.00399988	0.00799703	0.0159996
		0.637		0.0598188	0.059812	0.0392827	0.0522465	0.0640454	0.0716943	0.0494741	0.0420223		0.0200731	0.0712034	0.0281445	0.0320088	0.0558952	0.0602485	0.0443073	0.0920723		0.0119951	0.00400018	0.00400025	0.00799616	0.00400019	0.0039999	0.00799711	0.0159995
		0.6375		0.0597977	0.0597573	0.039201	0.0521311	0.0639264	0.0716276	0.0493827	0.0419349		0.0200761	0.0711722	0.0281443	0.0320095	0.0558794	0.0602462	0.0443127	0.0920713		0.0119955	0.00400019	0.00400025	0.00799625	0.0040002	0.00399992	0.00799719	0.0159995
		0.638		0.0597757	0.0597025	0.0391205	0.0520164	0.0638067	0.0715605	0.0492938	0.0418456		0.0200792	0.0711403	0.028144	0.0320101	0.0558629	0.0602435	0.0443181	0.0920703		0.0119959	0.0040002	0.00400025	0.00799633	0.0040002	0.00399995	0.00799726	0.0159994
		0.6385		0.0597528	0.0596477	0.0390409	0.0519023	0.0636863	0.071493	0.0492076	0.0417545		0.0200823	0.0711079	0.0281434	0.0320108	0.0558458	0.0602404	0.0443234	0.0920691		0.0119963	0.0040002	0.00400025	0.00799642	0.00400021	0.00399996	0.00799734	0.0159993
		0.639		0.0597291	0.0595927	0.0389625	0.051789	0.0635654	0.0714249	0.0491238	0.0416614		0.0200855	0.0710749	0.0281427	0.0320115	0.0558281	0.0602369	0.0443286	0.0920678		0.0119967	0.00400021	0.00400025	0.0079965	0.00400021	0.00399998	0.00799742	0.0159993
		0.6395		0.0597045	0.0595377	0.0388851	0.0516763	0.0634439	0.0713562	0.0490425	0.0415663		0.0200887	0.0710413	0.0281419	0.0320122	0.0558098	0.060233	0.0443338	0.0920664		0.0119972	0.00400021	0.00400024	0.00799659	0.00400021	0.004	0.00799749	0.0159992
		0.64		0.0596789	0.0594825	0.0388088	0.0515642	0.0633219	0.071287	0.0489637	0.0414694		0.0200919	0.0710072	0.0281408	0.0320129	0.0557908	0.0602288	0.0443388	0.0920648		0.0119976	0.00400022	0.00400024	0.00799667	0.00400021	0.00400002	0.00799756	0.0159991
		0.6405		0.0596524	0.0594271	0.0387335	0.0514529	0.0631994	0.0712171	0.0488872	0.0413706		0.0200952	0.0709725	0.0281396	0.0320137	0.0557711	0.060224	0.0443437	0.0920631		0.0119981	0.00400022	0.00400024	0.00799675	0.00400022	0.00400003	0.00799764	0.015999
		0.641		0.059625	0.0593715	0.0386593	0.0513422	0.0630766	0.0711465	0.048813	0.0412698		0.0200985	0.0709373	0.0281381	0.0320145	0.0557508	0.0602189	0.0443484	0.0920612		0.0119986	0.00400023	0.00400024	0.00799684	0.00400022	0.00400005	0.00799771	0.015999
		0.6415		0.0595967	0.0593157	0.0385861	0.0512321	0.0629533	0.0710751	0.0487412	0.0411671		0.0201018	0.0709015	0.0281365	0.0320153	0.0557298	0.0602132	0.044353	0.0920591		0.0119991	0.00400023	0.00400024	0.00799692	0.00400022	0.00400006	0.00799778	0.0159989
		0.642		0.0595673	0.0592595	0.038514	0.0511227	0.0628297	0.0710029	0.0486716	0.0410625		0.0201052	0.0708652	0.0281346	0.0320161	0.0557081	0.0602071	0.0443575	0.0920568		0.0119996	0.00400024	0.00400023	0.007997	0.00400023	0.00400008	0.00799785	0.0159988
		0.6425		0.059537	0.059203	0.0384429	0.0510139	0.0627058	0.07093	0.0486041	0.0409561		0.0201087	0.0708284	0.0281325	0.0320169	0.0556857	0.0602005	0.0443618	0.0920543		0.0120002	0.00400024	0.00400023	0.00799708	0.00400023	0.00400009	0.00799792	0.0159987
		0.643		0.0595058	0.0591461	0.0383729	0.0509058	0.0625817	0.0708561	0.0485388	0.0408477		0.0201121	0.0707911	0.0281302	0.0320178	0.0556627	0.0601934	0.044366	0.0920516		0.0120007	0.00400024	0.00400023	0.00799717	0.00400023	0.0040001	0.00799799	0.0159986
		0.6435		0.0594735	0.0590889	0.038304	0.0507984	0.0624573	0.0707813	0.0484756	0.0407374		0.0201156	0.0707534	0.0281277	0.0320187	0.0556389	0.0601858	0.0443699	0.0920486		0.0120013	0.00400024	0.00400023	0.00799725	0.00400023	0.00400012	0.00799806	0.0159985
		0.644		0.0594402	0.0590312	0.0382361	0.0506916	0.0623328	0.0707055	0.0484144	0.0406253		0.0201192	0.0707152	0.0281249	0.0320196	0.0556143	0.0601776	0.0443737	0.0920454		0.0120019	0.00400024	0.00400022	0.00799733	0.00400024	0.00400013	0.00799812	0.0159984
		0.6445		0.0594059	0.058973	0.0381694	0.0505854	0.0622083	0.0706288	0.0483553	0.0405113		0.0201227	0.0706765	0.0281219	0.0320205	0.0555891	0.0601689	0.0443772	0.0920419		0.0120025	0.00400025	0.00400022	0.00799741	0.00400024	0.00400014	0.00799819	0.0159983
		0.645		0.0593706	0.0589144	0.0381037	0.0504799	0.0620836	0.070551	0.048298	0.0403953		0.0201263	0.0706374	0.0281186	0.0320215	0.0555631	0.0601595	0.0443805	0.0920381		0.0120032	0.00400025	0.00400022	0.00799749	0.00400024	0.00400015	0.00799825	0.0159982
		0.6455		0.0593343	0.0588552	0.0380391	0.0503751	0.061959	0.0704721	0.0482426	0.0402775		0.02013	0.070598	0.028115	0.0320225	0.0555364	0.0601497	0.0443836	0.0920339		0.0120038	0.00400025	0.00400021	0.00799756	0.00400024	0.00400016	0.00799831	0.0159981
		0.646		0.0592969	0.0587956	0.0379757	0.0502709	0.0618345	0.0703921	0.0481891	0.0401578		0.0201336	0.0705581	0.0281112	0.0320235	0.0555089	0.0601392	0.0443865	0.0920295		0.0120045	0.00400025	0.00400021	0.00799764	0.00400024	0.00400017	0.00799837	0.015998
		0.6465		0.0592584	0.0587353	0.0379133	0.0501675	0.0617101	0.0703109	0.0481373	0.0400363		0.0201373	0.0705179	0.0281071	0.0320245	0.0554807	0.060128	0.0443891	0.0920247		0.0120052	0.00400025	0.00400021	0.00799772	0.00400025	0.00400017	0.00799843	0.0159979
		0.647		0.0592189	0.0586744	0.0378521	0.0500647	0.0615858	0.0702286	0.0480872	0.0399128		0.020141	0.0704773	0.0281027	0.0320256	0.0554518	0.0601163	0.0443914	0.0920196		0.0120059	0.00400025	0.00400021	0.00799779	0.00400025	0.00400018	0.00799849	0.0159978
		0.6475		0.0591784	0.0586129	0.0377919	0.0499626	0.0614618	0.0701451	0.0480388	0.0397875		0.0201447	0.0704365	0.028098	0.0320267	0.055422	0.0601038	0.0443934	0.0920141		0.0120067	0.00400025	0.0040002	0.00799787	0.00400025	0.00400019	0.00799855	0.0159977
		0.648		0.0591368	0.0585508	0.0377329	0.0498612	0.0613382	0.0700603	0.047992	0.0396602		0.0201485	0.0703954	0.028093	0.0320278	0.0553915	0.0600907	0.0443951	0.0920082		0.0120074	0.00400025	0.0040002	0.00799794	0.00400025	0.0040002	0.00799861	0.0159976
		0.6485		0.0590941	0.058488	0.037675	0.0497605	0.0612149	0.0699743	0.0479468	0.0395311		0.0201522	0.070354	0.0280877	0.0320289	0.0553603	0.0600769	0.0443964	0.092002		0.0120082	0.00400025	0.00400019	0.00799801	0.00400025	0.0040002	0.00799867	0.0159975
		0.649		0.0590503	0.0584245	0.0376182	0.0496606	0.061092	0.0698869	0.0479031	0.0394001		0.020156	0.0703124	0.0280821	0.0320301	0.0553282	0.0600625	0.0443975	0.0919953		0.012009	0.00400025	0.00400019	0.00799808	0.00400025	0.00400021	0.00799872	0.0159974
		0.6495		0.0590054	0.0583603	0.0375625	0.0495615	0.0609696	0.0697983	0.0478608	0.0392672		0.0201597	0.0702706	0.0280761	0.0320313	0.0552954	0.0600472	0.0443982	0.0919882		0.0120098	0.00400025	0.00400019	0.00799815	0.00400025	0.00400021	0.00799877	0.0159973
		0.65		0.0589595	0.0582954	0.0375079	0.0494631	0.0608478	0.0697083	0.0478199	0.0391324		0.0201635	0.0702286	0.0280698	0.0320325	0.0552618	0.0600313	0.0443985	0.0919806		0.0120107	0.00400025	0.00400018	0.00799822	0.00400025	0.00400022	0.00799883	0.0159971
		0.6505		0.0589125	0.0582298	0.0374544	0.0493656	0.0607267	0.069617	0.0477804	0.0389957		0.0201673	0.0701866	0.0280631	0.0320338	0.0552275	0.0600145	0.0443984	0.0919726		0.0120116	0.00400024	0.00400018	0.00799829	0.00400025	0.00400022	0.00799888	0.015997
		0.651		0.0588644	0.0581634	0.037402	0.0492688	0.0606062	0.0695242	0.0477421	0.0388571		0.0201711	0.0701444	0.0280561	0.0320351	0.0551923	0.059997	0.0443979	0.0919641		0.0120125	0.00400024	0.00400018	0.00799836	0.00400025	0.00400023	0.00799893	0.0159969
		0.6515		0.0588152	0.0580962	0.0373506	0.0491729	0.0604865	0.0694301	0.0477051	0.0387167		0.0201749	0.0701022	0.0280487	0.0320364	0.0551564	0.0599787	0.044397	0.0919552		0.0120134	0.00400024	0.00400017	0.00799842	0.00400025	0.00400023	0.00799898	0.0159968
		0.652		0.058765	0.0580283	0.0373003	0.0490778	0.0603676	0.0693346	0.0476693	0.0385744		0.0201786	0.0700601	0.0280409	0.0320377	0.0551197	0.0599596	0.0443956	0.0919457		0.0120143	0.00400024	0.00400017	0.00799849	0.00400025	0.00400023	0.00799902	0.0159966
		0.6525		0.0587136	0.0579596	0.037251	0.0489836	0.0602496	0.0692377	0.0476346	0.0384302		0.0201824	0.0700179	0.0280328	0.0320391	0.0550822	0.0599396	0.0443938	0.0919357		0.0120153	0.00400024	0.00400017	0.00799855	0.00400024	0.00400024	0.00799907	0.0159965
		0.653		0.0586612	0.0578901	0.0372027	0.0488902	0.0601325	0.0691394	0.047601	0.0382841		0.0201861	0.0699759	0.0280242	0.0320405	0.055044	0.0599188	0.0443915	0.0919252		0.0120163	0.00400023	0.00400016	0.00799862	0.00400024	0.00400024	0.00799912	0.0159964
		0.6535		0.0586078	0.0578198	0.0371554	0.0487978	0.0600164	0.0690396	0.0475685	0.0381362		0.0201899	0.0699339	0.0280152	0.0320419	0.055005	0.0598971	0.0443887	0.0919141		0.0120173	0.00400023	0.00400016	0.00799868	0.00400024	0.00400024	0.00799916	0.0159962
		0.654		0.0585533	0.0577488	0.0371091	0.0487062	0.0599014	0.0689384	0.0475369	0.0379865		0.0201936	0.0698922	0.0280059	0.0320434	0.0549652	0.0598746	0.0443854	0.0919025		0.0120184	0.00400023	0.00400016	0.00799874	0.00400024	0.00400024	0.00799921	0.0159961
		0.6545		0.0584977	0.0576769	0.0370638	0.0486154	0.0597874	0.0688358	0.0475062	0.0378349		0.0201972	0.0698506	0.0279961	0.0320449	0.0549247	0.0598511	0.0443815	0.0918903		0.0120194	0.00400023	0.00400015	0.0079988	0.00400024	0.00400025	0.00799925	0.015996
		0.655		0.0584411	0.0576042	0.0370193	0.0485256	0.0596745	0.0687318	0.0474764	0.0376815		0.0202009	0.0698093	0.0279858	0.0320464	0.0548834	0.0598267	0.0443771	0.0918775		0.0120205	0.00400022	0.00400015	0.00799886	0.00400023	0.00400025	0.00799929	0.0159958
		0.6555		0.0583835	0.0575308	0.0369759	0.0484367	0.0595627	0.0686264	0.0474474	0.0375263		0.0202045	0.0697682	0.0279752	0.0320479	0.0548413	0.0598014	0.0443721	0.0918641		0.0120216	0.00400022	0.00400014	0.00799891	0.00400023	0.00400025	0.00799933	0.0159957
		0.656		0.0583248	0.0574565	0.0369333	0.0483487	0.0594522	0.0685196	0.0474192	0.0373694		0.0202081	0.0697275	0.027964	0.0320495	0.0547986	0.0597751	0.0443665	0.09185		0.0120228	0.00400022	0.00400014	0.00799897	0.00400022	0.00400025	0.00799937	0.0159955
		0.6565		0.0582652	0.0573815	0.0368916	0.0482616	0.0593428	0.0684114	0.0473918	0.0372106		0.0202116	0.0696871	0.0279525	0.0320511	0.0547551	0.0597479	0.0443603	0.0918354		0.012024	0.00400021	0.00400014	0.00799902	0.00400022	0.00400025	0.0079994	0.0159954
		0.657		0.0582045	0.0573057	0.0368507	0.0481754	0.0592347	0.0683018	0.047365	0.0370502		0.020215	0.0696471	0.0279404	0.0320527	0.0547109	0.0597197	0.0443534	0.0918201		0.0120252	0.00400021	0.00400013	0.00799908	0.00400021	0.00400025	0.00799944	0.0159952
		0.6575		0.0581429	0.0572292	0.0368106	0.0480902	0.0591279	0.0681908	0.0473388	0.036888		0.0202184	0.0696075	0.0279279	0.0320544	0.054666	0.0596904	0.0443458	0.0918041		0.0120264	0.00400021	0.00400013	0.00799913	0.00400021	0.00400025	0.00799948	0.0159951
		0.658		0.0580804	0.057152	0.0367714	0.0480059	0.0590223	0.0680786	0.0473132	0.0367241		0.0202218	0.0695683	0.0279148	0.0320561	0.0546204	0.0596602	0.0443376	0.0917875		0.0120276	0.0040002	0.00400013	0.00799918	0.0040002	0.00400025	0.00799951	0.0159949
		0.6585		0.0580169	0.057074	0.0367329	0.0479225	0.058918	0.067965	0.0472882	0.0365586		0.020225	0.0695296	0.0279013	0.0320578	0.0545742	0.0596289	0.0443286	0.0917701		0.0120289	0.0040002	0.00400012	0.00799923	0.0040002	0.00400025	0.00799955	0.0159948
		0.659		0.0579525	0.0569954	0.0366952	0.0478401	0.058815	0.0678502	0.0472637	0.0363915		0.0202282	0.0694914	0.0278873	0.0320595	0.0545273	0.0595966	0.0443189	0.0917521		0.0120302	0.0040002	0.00400012	0.00799928	0.00400019	0.00400025	0.00799958	0.0159946
		0.6595		0.0578873	0.056916	0.0366581	0.0477586	0.0587134	0.0677341	0.0472396	0.0362228		0.0202313	0.0694536	0.0278727	0.0320612	0.0544797	0.0595632	0.0443085	0.0917333		0.0120315	0.00400019	0.00400012	0.00799933	0.00400018	0.00400025	0.00799961	0.0159945
		0.66		0.0578212	0.0568361	0.0366218	0.047678	0.0586131	0.0676169	0.0472159	0.0360526		0.0202343	0.0694164	0.0278577	0.032063	0.0544315	0.0595287	0.0442972	0.0917139		0.0120329	0.00400019	0.00400011	0.00799938	0.00400017	0.00400025	0.00799964	0.0159943
		0.6605		0.0577543	0.0567555	0.0365861	0.0475984	0.0585141	0.0674985	0.0471925	0.0358809		0.0202372	0.0693797	0.0278421	0.0320648	0.0543828	0.0594931	0.0442852	0.0916936		0.0120342	0.00400019	0.00400011	0.00799942	0.00400017	0.00400024	0.00799967	0.0159942
		0.661		0.0576866	0.0566744	0.036551	0.0475198	0.0584164	0.067379	0.0471695	0.0357077		0.02024	0.0693435	0.0278259	0.0320667	0.0543334	0.0594564	0.0442723	0.0916726		0.0120356	0.00400018	0.0040001	0.00799947	0.00400016	0.00400024	0.0079997	0.015994
		0.6615		0.0576181	0.0565927	0.0365165	0.0474421	0.0583201	0.0672585	0.0471468	0.0355332		0.0202427	0.069308	0.0278092	0.0320685	0.0542835	0.0594186	0.0442585	0.0916509		0.0120371	0.00400018	0.0040001	0.00799951	0.00400015	0.00400024	0.00799972	0.0159938
		0.662		0.0575489	0.0565106	0.0364826	0.0473655	0.0582251	0.067137	0.0471243	0.0353574		0.0202453	0.069273	0.027792	0.0320704	0.0542331	0.0593797	0.0442439	0.0916284		0.0120385	0.00400018	0.0040001	0.00799955	0.00400014	0.00400024	0.00799975	0.0159937
		0.6625		0.0574791	0.0564279	0.0364492	0.0472897	0.0581314	0.0670145	0.0471019	0.0351803		0.0202477	0.0692386	0.0277742	0.0320723	0.0541822	0.0593396	0.0442283	0.0916051		0.01204	0.00400017	0.00400009	0.00799959	0.00400013	0.00400024	0.00799978	0.0159935
		0.663		0.0574085	0.0563449	0.0364163	0.047215	0.0580391	0.0668912	0.0470798	0.0350019		0.02025	0.0692048	0.0277558	0.0320742	0.0541308	0.0592984	0.0442119	0.091581		0.0120415	0.00400017	0.00400009	0.00799963	0.00400012	0.00400023	0.0079998	0.0159934
		0.6635		0.0573374	0.0562615	0.0363839	0.0471413	0.057948	0.0667671	0.0470577	0.0348225		0.0202522	0.0691717	0.0277368	0.0320761	0.0540789	0.059256	0.0441944	0.091556		0.012043	0.00400017	0.00400009	0.00799967	0.0040001	0.00400023	0.00799983	0.0159932
		0.664		0.0572657	0.0561779	0.0363519	0.0470686	0.0578583	0.0666422	0.0470357	0.034642		0.0202542	0.0691392	0.0277172	0.0320781	0.0540265	0.0592124	0.044176	0.0915303		0.0120445	0.00400016	0.00400008	0.00799971	0.00400009	0.00400023	0.00799985	0.015993
		0.6645		0.0571933	0.056094	0.0363203	0.0469969	0.0577698	0.0665166	0.0470138	0.0344606		0.020256	0.0691074	0.0276971	0.03208	0.0539738	0.0591676	0.0441565	0.0915037		0.0120461	0.00400016	0.00400008	0.00799975	0.00400008	0.00400023	0.00799987	0.0159929
		0.665		0.0571205	0.0560098	0.036289	0.0469262	0.0576827	0.0663904	0.0469918	0.0342783		0.0202577	0.0690762	0.0276763	0.032082	0.0539206	0.0591217	0.044136	0.0914763		0.0120477	0.00400016	0.00400008	0.00799978	0.00400006	0.00400022	0.00799989	0.0159927
		0.6655		0.0570471	0.0559256	0.0362581	0.0468566	0.0575968	0.0662636	0.0469699	0.0340952		0.0202592	0.0690456	0.027655	0.032084	0.053867	0.0590745	0.0441144	0.091448		0.0120493	0.00400015	0.00400007	0.00799982	0.00400005	0.00400022	0.00799991	0.0159925
		0.666		0.0569733	0.0558413	0.0362274	0.046788	0.0575121	0.0661363	0.0469478	0.0339114		0.0202605	0.0690157	0.027633	0.032086	0.053813	0.0590261	0.0440918	0.0914189		0.0120509	0.00400015	0.00400007	0.00799985	0.00400003	0.00400022	0.00799993	0.0159924
		0.6665		0.056899	0.055757	0.0361971	0.0467205	0.0574286	0.0660086	0.0469257	0.033727		0.0202616	0.0689865	0.0276104	0.032088	0.0537586	0.0589765	0.044068	0.0913889		0.0120526	0.00400014	0.00400007	0.00799988	0.00400002	0.00400021	0.00799995	0.0159922
		0.667		0.0568243	0.0556727	0.0361669	0.046654	0.0573464	0.0658806	0.0469034	0.0335421		0.0202624	0.068958	0.0275871	0.03209	0.0537038	0.0589257	0.0440431	0.091358		0.0120543	0.00400014	0.00400007	0.00799992	0.004	0.00400021	0.00799997	0.0159921
		0.6675		0.0567491	0.0555885	0.036137	0.0465887	0.0572653	0.0657522	0.046881	0.0333567		0.0202631	0.0689302	0.0275633	0.032092	0.0536486	0.0588736	0.0440169	0.0913263		0.012056	0.00400014	0.00400006	0.00799995	0.00399998	0.00400021	0.00799999	0.0159919
		0.668		0.0566735	0.0555045	0.0361071	0.0465244	0.0571854	0.0656237	0.0468583	0.0331711		0.0202635	0.068903	0.0275388	0.032094	0.053593	0.0588204	0.0439896	0.0912937		0.0120577	0.00400013	0.00400006	0.00799998	0.00399996	0.0040002	0.008	0.0159917
		0.6685		0.0565976	0.0554206	0.0360774	0.0464613	0.0571066	0.065495	0.0468355	0.0329852		0.0202637	0.0688765	0.0275137	0.0320961	0.0535371	0.0587658	0.0439611	0.0912602		0.0120594	0.00400013	0.00400006	0.00800001	0.00399995	0.0040002	0.00800002	0.0159916
		0.669		0.0565213	0.055337	0.0360478	0.0463992	0.0570289	0.0653662	0.0468124	0.0327992		0.0202636	0.0688507	0.0274879	0.0320981	0.0534808	0.0587101	0.0439313	0.0912258		0.0120612	0.00400013	0.00400005	0.00800004	0.00399992	0.0040002	0.00800003	0.0159914
		0.6695		0.0564447	0.0552537	0.0360182	0.0463383	0.0569523	0.0652375	0.046789	0.0326131		0.0202633	0.0688256	0.0274614	0.0321001	0.053424	0.0586531	0.0439002	0.0911904		0.0120629	0.00400012	0.00400005	0.00800006	0.0039999	0.00400019	0.00800005	0.0159913
		0.67		0.0563678	0.0551706	0.0359887	0.0462785	0.0568767	0.0651088	0.0467653	0.032427		0.0202627	0.0688011	0.0274344	0.0321022	0.0533669	0.0585949	0.0438678	0.0911542		0.0120647	0.00400012	0.00400005	0.00800009	0.00399988	0.00400019	0.00800006	0.0159911
		0.6705		0.0562905	0.055088	0.0359591	0.0462198	0.0568022	0.0649804	0.0467413	0.0322411		0.0202618	0.0687774	0.0274066	0.0321042	0.0533094	0.0585355	0.0438341	0.0911171		0.0120665	0.00400012	0.00400005	0.00800011	0.00399986	0.00400019	0.00800008	0.015991
		0.671		0.056213	0.0550057	0.0359294	0.0461622	0.0567286	0.0648522	0.046717	0.0320554		0.0202606	0.0687543	0.0273783	0.0321062	0.0532515	0.0584748	0.043799	0.0910791		0.0120683	0.00400011	0.00400004	0.00800014	0.00399984	0.00400018	0.00800009	0.0159908
		0.6715		0.0561352	0.0549238	0.0358996	0.0461058	0.056656	0.0647244	0.0466922	0.0318699		0.0202591	0.0687318	0.0273492	0.0321082	0.0531932	0.058413	0.0437625	0.0910401		0.0120701	0.00400011	0.00400004	0.00800016	0.00399981	0.00400018	0.0080001	0.0159907
		0.672		0.0560572	0.0548423	0.0358697	0.0460504	0.0565844	0.064597	0.0466671	0.0316848		0.0202572	0.0687101	0.0273195	0.0321102	0.0531344	0.0583499	0.0437246	0.0910003		0.012072	0.0040001	0.00400004	0.00800018	0.00399979	0.00400018	0.00800011	0.0159905
		0.6725		0.055979	0.0547613	0.0358397	0.0459961	0.0565136	0.06447	0.0466416	0.0315002		0.020255	0.068689	0.0272892	0.0321121	0.0530752	0.0582856	0.0436853	0.0909596		0.0120738	0.0040001	0.00400004	0.0080002	0.00399976	0.00400017	0.00800012	0.0159904
		0.673		0.0559005	0.0546807	0.0358094	0.0459428	0.0564437	0.0643436	0.0466156	0.0313161		0.0202525	0.0686685	0.0272582	0.0321141	0.0530156	0.0582201	0.0436444	0.0909179		0.0120757	0.0040001	0.00400003	0.00800022	0.00399973	0.00400017	0.00800013	0.0159902
		0.6735		0.0558219	0.0546007	0.0357789	0.0458907	0.0563746	0.0642178	0.0465892	0.0311326		0.0202496	0.0686488	0.0272265	0.032116	0.0529555	0.0581535	0.0436021	0.0908754		0.0120775	0.00400009	0.00400003	0.00800024	0.00399971	0.00400017	0.00800014	0.0159901
		0.674		0.0557431	0.0545211	0.0357481	0.0458395	0.0563063	0.0640927	0.0465624	0.0309498		0.0202463	0.0686296	0.0271942	0.0321179	0.0528949	0.0580857	0.0435583	0.0908319		0.0120794	0.00400009	0.00400003	0.00800026	0.00399968	0.00400016	0.00800015	0.01599
		0.6745		0.0556641	0.0544421	0.035717	0.0457894	0.0562388	0.0639682	0.046535	0.0307679		0.0202426	0.0686111	0.0271612	0.0321198	0.0528339	0.0580167	0.0435129	0.0907876		0.0120812	0.00400009	0.00400003	0.00800028	0.00399965	0.00400016	0.00800016	0.0159898
		0.675		0.055585	0.0543636	0.0356855	0.0457403	0.056172	0.0638445	0.0465072	0.0305868		0.0202385	0.0685932	0.0271276	0.0321216	0.0527723	0.0579466	0.043466	0.0907423		0.0120831	0.00400008	0.00400003	0.0080003	0.00399961	0.00400016	0.00800017	0.0159897
		0.6755		0.0555057	0.0542856	0.0356536	0.0456922	0.0561059	0.0637217	0.0464789	0.0304067		0.020234	0.0685759	0.0270934	0.0321235	0.0527102	0.0578754	0.0434174	0.0906962		0.012085	0.00400008	0.00400002	0.00800031	0.00399958	0.00400015	0.00800017	0.0159896
		0.676		0.0554264	0.0542081	0.0356214	0.045645	0.0560405	0.0635996	0.04645	0.0302276		0.020229	0.0685592	0.0270585	0.0321252	0.0526476	0.0578031	0.0433673	0.0906493		0.0120868	0.00400008	0.00400002	0.00800033	0.00399955	0.00400015	0.00800018	0.0159895
		0.6765		0.055347	0.0541312	0.0355887	0.0455987	0.0559757	0.0634784	0.0464207	0.0300496		0.0202236	0.0685431	0.027023	0.032127	0.0525845	0.0577297	0.0433155	0.0906014		0.0120887	0.00400007	0.00400002	0.00800034	0.00399952	0.00400014	0.00800019	0.0159894
		0.677		0.0552675	0.0540548	0.0355555	0.0455534	0.0559115	0.0633581	0.0463908	0.0298728		0.0202177	0.0685276	0.0269868	0.0321286	0.0525208	0.0576553	0.043262	0.0905528		0.0120905	0.00400007	0.00400002	0.00800036	0.00399948	0.00400014	0.00800019	0.0159893
		0.6775		0.055188	0.0539789	0.0355218	0.0455089	0.0558478	0.0632387	0.0463604	0.0296973		0.0202114	0.0685127	0.0269501	0.0321303	0.0524564	0.0575798	0.0432069	0.0905032		0.0120924	0.00400007	0.00400002	0.00800037	0.00399944	0.00400014	0.0080002	0.0159892
		0.678		0.0551085	0.0539036	0.0354875	0.0454653	0.0557847	0.0631203	0.0463295	0.029523		0.0202045	0.0684983	0.0269127	0.0321319	0.0523915	0.0575034	0.04315	0.0904529		0.0120942	0.00400007	0.00400002	0.00800038	0.00399941	0.00400013	0.0080002	0.0159891
		0.6785		0.0550289	0.0538287	0.0354527	0.0454225	0.055722	0.0630028	0.046298	0.02935		0.0201971	0.0684845	0.0268748	0.0321334	0.052326	0.0574261	0.0430914	0.0904018		0.0120961	0.00400006	0.00400001	0.00800039	0.00399937	0.00400013	0.00800021	0.015989
		0.679		0.0549494	0.0537544	0.0354172	0.0453805	0.0556598	0.0628863	0.046266	0.0291784		0.0201892	0.0684712	0.0268362	0.0321348	0.0522598	0.0573478	0.0430311	0.0903498		0.0120979	0.00400006	0.00400001	0.0080004	0.00399933	0.00400013	0.00800021	0.015989
		0.6795		0.05487	0.0536806	0.0353811	0.0453392	0.0555981	0.0627708	0.0462334	0.0290082		0.0201807	0.0684585	0.0267971	0.0321362	0.0521929	0.0572686	0.042969	0.0902972		0.0120997	0.00400006	0.00400001	0.00800041	0.00399929	0.00400012	0.00800022	0.0159889
		0.68		0.0547906	0.0536073	0.0353444	0.0452986	0.0555367	0.0626564	0.0462004	0.0288394		0.0201717	0.0684462	0.0267574	0.0321376	0.0521253	0.0571886	0.0429052	0.0902437		0.0121014	0.00400005	0.00400001	0.00800042	0.00399924	0.00400012	0.00800022	0.0159888
		0.6805		0.0547113	0.0535345	0.0353069	0.0452587	0.0554756	0.0625429	0.0461668	0.0286721		0.0201621	0.0684345	0.0267172	0.0321388	0.052057	0.0571078	0.0428395	0.0901895		0.0121032	0.00400005	0.00400001	0.00800043	0.0039992	0.00400012	0.00800022	0.0159888
		0.681		0.0546321	0.0534621	0.0352687	0.0452195	0.0554149	0.0624305	0.0461327	0.0285063		0.0201519	0.0684232	0.0266765	0.03214	0.051988	0.0570262	0.0427721	0.0901347		0.0121049	0.00400005	0.00400001	0.00800044	0.00399916	0.00400011	0.00800023	0.0159887
		0.6815		0.0545531	0.0533901	0.0352297	0.0451808	0.0553545	0.0623191	0.046098	0.028342		0.0201411	0.0684124	0.0266353	0.0321411	0.0519182	0.0569438	0.0427028	0.0900791		0.0121066	0.00400005	0.00400001	0.00800045	0.00399911	0.00400011	0.00800023	0.0159887
		0.682		0.0544743	0.0533186	0.0351899	0.0451427	0.0552943	0.0622088	0.0460629	0.0281792		0.0201297	0.068402	0.0265935	0.0321421	0.0518477	0.0568607	0.0426317	0.0900229		0.0121083	0.00400004	0.004	0.00800045	0.00399907	0.0040001	0.00800023	0.0159887
		0.6825		0.0543957	0.0532475	0.0351493	0.0451051	0.0552344	0.0620995	0.0460273	0.0280179		0.0201176	0.0683921	0.0265513	0.032143	0.0517764	0.056777	0.0425587	0.0899661		0.0121099	0.00400004	0.004	0.00800046	0.00399902	0.0040001	0.00800024	0.0159887
		0.683		0.0543173	0.0531768	0.0351079	0.045068	0.0551746	0.0619912	0.0459912	0.0278581		0.0201048	0.0683826	0.0265086	0.0321438	0.0517042	0.0566926	0.0424839	0.0899087		0.0121115	0.00400004	0.004	0.00800046	0.00399897	0.0040001	0.00800024	0.0159887
		0.6835		0.0542392	0.0531065	0.0350656	0.0450313	0.055115	0.061884	0.0459547	0.0276998		0.0200914	0.0683735	0.0264655	0.0321445	0.0516312	0.0566076	0.0424072	0.0898507		0.0121131	0.00400004	0.004	0.00800047	0.00399892	0.00400009	0.00800024	0.0159887
		0.684		0.0541614	0.0530365	0.0350224	0.044995	0.0550556	0.0617777	0.0459177	0.0275431		0.0200773	0.0683648	0.026422	0.032145	0.0515574	0.0565219	0.0423286	0.0897922		0.0121146	0.00400003	0.004	0.00800047	0.00399887	0.00400009	0.00800024	0.0159887
		0.6845		0.0540839	0.0529668	0.0349783	0.044959	0.0549963	0.0616725	0.0458803	0.0273878		0.0200624	0.0683564	0.0263782	0.0321455	0.0514826	0.0564358	0.0422481	0.0897332		0.0121161	0.00400003	0.004	0.00800047	0.00399881	0.00400009	0.00800024	0.0159888
		0.685		0.0540067	0.0528974	0.0349332	0.0449234	0.054937	0.0615683	0.0458425	0.0272341		0.0200468	0.0683484	0.0263339	0.0321458	0.051407	0.056349	0.0421658	0.0896738		0.0121175	0.00400003	0.004	0.00800047	0.00399876	0.00400008	0.00800024	0.0159888
		0.6855		0.0539299	0.0528283	0.0348872	0.0448879	0.0548778	0.0614651	0.0458043	0.0270818		0.0200305	0.0683407	0.0262894	0.0321461	0.0513304	0.0562618	0.0420815	0.0896139		0.0121189	0.00400003	0.004	0.00800047	0.0039987	0.00400008	0.00800024	0.0159889
		0.686		0.0538535	0.0527595	0.0348402	0.0448527	0.0548186	0.0613629	0.0457657	0.026931		0.0200134	0.0683334	0.0262445	0.0321461	0.0512529	0.0561741	0.0419954	0.0895537		0.0121202	0.00400003	0.004	0.00800047	0.00399865	0.00400008	0.00800024	0.015989
		0.6865		0.0537774	0.0526908	0.0347922	0.0448176	0.0547595	0.0612616	0.0457268	0.0267816		0.0199955	0.0683263	0.0261994	0.0321461	0.0511745	0.0560859	0.0419074	0.0894931		0.0121214	0.00400002	0.004	0.00800047	0.00399859	0.00400007	0.00800024	0.0159891
		0.687		0.0537018	0.0526224	0.0347432	0.0447826	0.0547003	0.0611613	0.0456875	0.0266337		0.0199768	0.0683195	0.0261541	0.0321459	0.0510951	0.0559972	0.0418175	0.0894322		0.0121226	0.00400002	0.004	0.00800047	0.00399853	0.00400007	0.00800024	0.0159892
		0.6875		0.0536265	0.0525541	0.0346931	0.0447476	0.0546411	0.061062	0.045648	0.0264872		0.0199572	0.0683129	0.0261085	0.0321455	0.0510147	0.0559082	0.0417257	0.089371		0.0121237	0.00400002	0.004	0.00800047	0.00399847	0.00400007	0.00800024	0.0159893
		0.688		0.0535517	0.0524859	0.034642	0.0447127	0.0545818	0.0609635	0.0456081	0.026342		0.0199369	0.0683066	0.0260628	0.032145	0.0509333	0.0558188	0.041632	0.0893095		0.0121248	0.00400002	0.004	0.00800047	0.00399841	0.00400007	0.00800024	0.0159894
		0.6885		0.0534772	0.0524178	0.0345898	0.0446777	0.0545225	0.0608659	0.0455679	0.0261981		0.0199156	0.0683005	0.026017	0.0321443	0.0508509	0.055729	0.0415365	0.0892477		0.0121257	0.00400002	0.004	0.00800046	0.00399835	0.00400006	0.00800024	0.0159896
		0.689		0.0534032	0.0523498	0.0345365	0.0446425	0.054463	0.0607693	0.0455275	0.0260556		0.0198935	0.0682946	0.0259711	0.0321434	0.0507674	0.0556389	0.0414391	0.0891858		0.0121266	0.00400002	0.00399999	0.00800046	0.00399829	0.00400006	0.00800024	0.0159898
		0.6895		0.0533297	0.0522818	0.0344821	0.0446072	0.0544035	0.0606734	0.0454867	0.0259143		0.0198705	0.0682889	0.0259251	0.0321423	0.0506829	0.0555485	0.0413399	0.0891236		0.0121274	0.00400001	0.00399999	0.00800045	0.00399822	0.00400006	0.00800024	0.01599
		0.69		0.0532565	0.0522139	0.0344267	0.0445717	0.0543438	0.0605784	0.0454457	0.0257742		0.0198466	0.0682833	0.0258791	0.0321411	0.0505973	0.0554578	0.0412389	0.0890613		0.0121281	0.00400001	0.00399999	0.00800045	0.00399816	0.00400005	0.00800024	0.0159902
		0.6905		0.0531838	0.0521459	0.0343701	0.0445359	0.054284	0.0604843	0.0454044	0.0256354		0.0198217	0.0682779	0.0258331	0.0321396	0.0505107	0.0553669	0.041136	0.0889988		0.0121287	0.00400001	0.00399999	0.00800044	0.00399809	0.00400005	0.00800024	0.0159904
		0.691		0.0531116	0.0520778	0.0343123	0.0444997	0.054224	0.0603909	0.0453628	0.0254977		0.019796	0.0682726	0.0257871	0.032138	0.050423	0.0552757	0.0410314	0.0889361		0.0121292	0.00400001	0.00399999	0.00800043	0.00399802	0.00400005	0.00800024	0.0159907
		0.6915		0.0530397	0.0520097	0.0342535	0.0444632	0.0541639	0.0602982	0.045321	0.025361		0.0197692	0.0682673	0.0257412	0.0321361	0.0503343	0.0551844	0.040925	0.0888733		0.0121296	0.00400001	0.00399999	0.00800042	0.00399796	0.00400005	0.00800024	0.0159909
		0.692		0.0529683	0.0519415	0.0341935	0.0444262	0.0541036	0.0602063	0.0452789	0.0252255		0.0197415	0.0682621	0.0256953	0.0321341	0.0502444	0.0550929	0.0408169	0.0888105		0.0121298	0.00400001	0.00399999	0.00800042	0.00399788	0.00400004	0.00800024	0.0159912
		0.6925		0.0528973	0.051873	0.0341323	0.0443887	0.0540431	0.0601152	0.0452365	0.0250909		0.0197127	0.068257	0.0256495	0.0321318	0.0501534	0.0550012	0.0407071	0.0887475		0.01213	0.00400001	0.00399999	0.00800041	0.00399781	0.00400004	0.00800024	0.0159916
		0.693		0.0528268	0.0518045	0.0340701	0.0443507	0.0539825	0.0600247	0.0451938	0.0249574		0.019683	0.0682519	0.0256039	0.0321292	0.0500614	0.0549095	0.0405957	0.0886844		0.01213	0.00400001	0.00399999	0.0080004	0.00399774	0.00400004	0.00800023	0.0159919
		0.6935		0.0527567	0.0517357	0.0340067	0.044312	0.0539217	0.0599349	0.0451508	0.0248247		0.0196522	0.0682468	0.0255583	0.0321264	0.0499683	0.0548177	0.0404826	0.0886213		0.0121299	0.004	0.00399999	0.00800038	0.00399767	0.00400004	0.00800023	0.0159923
		0.694		0.0526869	0.0516666	0.0339421	0.0442726	0.0538607	0.0598457	0.0451076	0.0246929		0.0196204	0.0682416	0.0255129	0.0321234	0.049874	0.0547258	0.0403679	0.0885582		0.0121297	0.004	0.00399999	0.00800037	0.0039976	0.00400004	0.00800023	0.0159927
		0.6945		0.0526176	0.0515973	0.0338764	0.0442326	0.0537995	0.0597572	0.0450641	0.024562		0.0195875	0.0682365	0.0254676	0.0321201	0.0497787	0.054634	0.0402516	0.088495		0.0121293	0.004	0.00399999	0.00800036	0.00399752	0.00400003	0.00800023	0.0159931
		0.695		0.0525487	0.0515276	0.0338096	0.0441917	0.0537381	0.0596692	0.0450202	0.0244318		0.0195535	0.0682312	0.0254225	0.0321165	0.0496823	0.0545421	0.0401339	0.0884318		0.0121288	0.004	0.004	0.00800035	0.00399745	0.00400003	0.00800023	0.0159935
		0.6955		0.0524802	0.0514576	0.0337417	0.0441499	0.0536766	0.0595818	0.0449761	0.0243023		0.0195185	0.0682259	0.0253776	0.0321126	0.0495848	0.0544504	0.0400147	0.0883686		0.0121281	0.004	0.004	0.00800033	0.00399737	0.00400003	0.00800023	0.015994
		0.696		0.0524121	0.0513873	0.0336727	0.0441073	0.0536149	0.059495	0.0449316	0.0241735		0.0194823	0.0682204	0.0253328	0.0321085	0.0494863	0.0543587	0.0398942	0.0883054		0.0121273	0.004	0.004	0.00800032	0.00399729	0.00400003	0.00800023	0.0159945
		0.6965		0.0523443	0.0513165	0.0336026	0.0440636	0.0535531	0.0594087	0.0448868	0.0240453		0.0194451	0.0682148	0.0252883	0.0321041	0.0493867	0.0542672	0.0397723	0.0882422		0.0121263	0.004	0.004	0.0080003	0.00399721	0.00400002	0.00800022	0.015995
		0.697		0.052277	0.0512453	0.0335314	0.044019	0.0534911	0.0593229	0.0448416	0.0239177		0.0194067	0.068209	0.025244	0.0320993	0.0492861	0.0541759	0.0396491	0.088179		0.0121251	0.004	0.004	0.00800028	0.00399714	0.00400002	0.00800022	0.0159955
		0.6975		0.0522099	0.0511737	0.0334591	0.0439732	0.0534289	0.0592376	0.0447961	0.0237906		0.0193671	0.068203	0.0251998	0.0320943	0.0491844	0.0540847	0.0395247	0.0881159		0.0121238	0.004	0.004	0.00800026	0.00399706	0.00400002	0.00800022	0.0159961
		0.698		0.0521433	0.0511016	0.0333858	0.0439263	0.0533666	0.0591527	0.0447503	0.0236639		0.0193264	0.0681968	0.0251559	0.0320889	0.0490818	0.0539939	0.0393992	0.0880529		0.0121222	0.004	0.004	0.00800025	0.00399698	0.00400002	0.00800022	0.0159967
		0.6985		0.0520769	0.0510289	0.0333115	0.0438782	0.0533042	0.0590683	0.044704	0.0235377		0.0192845	0.0681904	0.0251122	0.0320832	0.0489781	0.0539033	0.0392727	0.0879898		0.0121205	0.004	0.004	0.00800023	0.0039969	0.00400002	0.00800022	0.0159974
		0.699		0.0520109	0.0509558	0.0332362	0.0438288	0.0532416	0.0589843	0.0446574	0.0234118		0.0192415	0.0681837	0.0250686	0.0320771	0.0488736	0.053813	0.0391451	0.0879269		0.0121186	0.004	0.004	0.00800021	0.00399681	0.00400002	0.00800022	0.015998
		0.6995		0.0519452	0.050882	0.0331599	0.0437781	0.0531788	0.0589007	0.0446103	0.0232863		0.0191973	0.0681767	0.0250254	0.0320707	0.0487681	0.0537231	0.0390167	0.0878641		0.0121164	0.004	0.004	0.00800018	0.00399673	0.00400001	0.00800021	0.0159988
		0.7		0.0518798	0.0508077	0.0330827	0.0437259	0.0531159	0.0588174	0.0445629	0.023161		0.0191518	0.0681694	0.0249823	0.0320639	0.0486617	0.0536335	0.0388875	0.0878013		0.0121141	0.004	0.004	0.00800016	0.00399665	0.00400001	0.00800021	0.0159995
		0.7005		0.0518148	0.0507328	0.0330045	0.0436724	0.0530529	0.0587346	0.0445149	0.0230359		0.0191052	0.0681618	0.0249394	0.0320568	0.0485544	0.0535443	0.0387575	0.0877386		0.0121115	0.00399999	0.004	0.00800014	0.00399657	0.00400001	0.00800021	0.0160003
		0.701		0.05175	0.0506572	0.0329254	0.0436173	0.0529896	0.0586521	0.0444665	0.0229109		0.0190573	0.0681538	0.0248968	0.0320493	0.0484463	0.0534555	0.038627	0.0876761		0.0121087	0.00399999	0.004	0.00800012	0.00399649	0.00400001	0.00800021	0.0160011
		0.7015		0.0516855	0.050581	0.0328453	0.0435606	0.0529263	0.0585699	0.0444177	0.0227861		0.0190082	0.0681454	0.0248544	0.0320414	0.0483375	0.0533671	0.0384959	0.0876137		0.0121057	0.00399999	0.00400001	0.00800009	0.0039964	0.00400001	0.00800021	0.0160019
		0.702		0.0516212	0.0505041	0.0327644	0.0435023	0.0528627	0.058488	0.0443683	0.0226614		0.0189579	0.0681365	0.0248121	0.032033	0.0482279	0.0532792	0.0383643	0.0875514		0.0121024	0.00399999	0.00400001	0.00800007	0.00399632	0.00400001	0.00800021	0.0160028
		0.7025		0.0515572	0.0504265	0.0326826	0.0434424	0.0527989	0.0584064	0.0443184	0.0225366		0.0189064	0.0681273	0.0247701	0.0320243	0.0481176	0.0531917	0.0382325	0.0874893		0.0120988	0.00399999	0.00400001	0.00800004	0.00399624	0.00400001	0.00800021	0.0160037
		0.703		0.0514935	0.0503482	0.0325999	0.0433807	0.052735	0.0583252	0.044268	0.0224119		0.0188536	0.0681175	0.0247283	0.0320152	0.0480066	0.0531048	0.0381004	0.0874273		0.012095	0.00399999	0.00400001	0.00800001	0.00399615	0.00400001	0.0080002	0.0160047
		0.7035		0.05143	0.0502692	0.0325164	0.0433172	0.0526708	0.0582442	0.0442171	0.0222871		0.0187996	0.0681073	0.0246866	0.0320056	0.047895	0.0530183	0.0379681	0.0873656		0.012091	0.00399999	0.00400001	0.00799998	0.00399607	0.00400001	0.0080002	0.0160057
		0.704		0.0513668	0.0501895	0.032432	0.0432518	0.0526064	0.0581635	0.0441655	0.0221622		0.0187443	0.0680965	0.0246452	0.0319956	0.0477829	0.0529323	0.0378357	0.087304		0.0120866	0.00399999	0.00400001	0.00799995	0.00399599	0.004	0.0080002	0.0160067
		0.7045		0.0513038	0.050109	0.0323468	0.0431846	0.0525418	0.0580831	0.0441134	0.0220371		0.0186878	0.0680852	0.0246039	0.0319851	0.0476702	0.0528469	0.0377034	0.0872426		0.012082	0.00399999	0.00400001	0.00799992	0.00399591	0.004	0.0080002	0.0160078
		0.705		0.051241	0.0500277	0.0322608	0.0431153	0.052477	0.058003	0.0440606	0.0219118		0.0186301	0.0680732	0.0245628	0.0319742	0.047557	0.052762	0.0375711	0.0871814		0.0120771	0.00399999	0.00400001	0.00799989	0.00399582	0.004	0.0080002	0.0160089
		0.7055		0.0511784	0.0499457	0.0321739	0.0430441	0.0524119	0.0579231	0.0440073	0.0217864		0.0185711	0.0680607	0.0245219	0.0319628	0.0474434	0.0526776	0.037439	0.0871205		0.0120719	0.004	0.00400002	0.00799986	0.00399574	0.004	0.0080002	0.01601
		0.706		0.051116	0.049863	0.0320863	0.0429708	0.0523465	0.0578435	0.0439533	0.0216607		0.0185109	0.0680476	0.0244811	0.0319509	0.0473293	0.0525938	0.0373072	0.0870598		0.0120663	0.004	0.00400002	0.00799982	0.00399566	0.004	0.0080002	0.0160112
		0.7065		0.0510539	0.0497794	0.0319978	0.0428953	0.0522808	0.0577642	0.0438986	0.0215347		0.0184494	0.0680337	0.0244404	0.0319385	0.0472149	0.0525106	0.0371756	0.0869994		0.0120605	0.004	0.00400002	0.00799979	0.00399558	0.004	0.0080002	0.0160125
		0.707		0.0509919	0.0496951	0.0319086	0.0428177	0.0522149	0.0576852	0.0438432	0.0214083		0.0183868	0.0680192	0.0243999	0.0319256	0.0471001	0.0524279	0.0370445	0.0869393		0.0120543	0.004	0.00400002	0.00799975	0.0039955	0.004	0.0080002	0.0160138
		0.7075		0.0509301	0.04961	0.0318186	0.0427379	0.0521486	0.0576064	0.0437871	0.0212817		0.0183229	0.068004	0.0243595	0.0319123	0.046985	0.0523459	0.0369138	0.0868795		0.0120478	0.004	0.00400002	0.00799972	0.00399542	0.004	0.0080002	0.0160151
		0.708		0.0508686	0.0495241	0.0317279	0.0426557	0.052082	0.0575279	0.0437302	0.0211547		0.0182578	0.067988	0.0243192	0.0318984	0.0468697	0.0522644	0.0367836	0.08682		0.012041	0.004	0.00400002	0.00799968	0.00399535	0.004	0.0080002	0.0160165
		0.7085		0.0508072	0.0494375	0.0316363	0.0425713	0.0520151	0.0574498	0.0436727	0.0210273		0.0181915	0.0679713	0.024279	0.0318839	0.0467542	0.0521835	0.0366541	0.0867609		0.0120337	0.004	0.00400003	0.00799964	0.00399527	0.004	0.00800019	0.0160179
		0.709		0.050746	0.0493501	0.0315441	0.0424845	0.0519479	0.0573719	0.0436143	0.0208994		0.018124	0.0679538	0.0242389	0.031869	0.0466386	0.0521033	0.0365252	0.0867021		0.0120262	0.004	0.00400003	0.0079996	0.00399519	0.004	0.00800019	0.0160194
		0.7095		0.0506851	0.049262	0.0314511	0.0423953	0.0518802	0.0572944	0.0435552	0.0207712		0.0180553	0.0679354	0.0241988	0.0318535	0.0465228	0.0520236	0.036397	0.0866437		0.0120182	0.004	0.00400003	0.00799956	0.00399512	0.004	0.00800019	0.0160209
		0.71		0.0506243	0.0491731	0.0313574	0.0423036	0.0518122	0.0572172	0.0434952	0.0206426		0.0179855	0.0679162	0.0241588	0.0318374	0.046407	0.0519446	0.0362696	0.0865858		0.0120099	0.004	0.00400003	0.00799952	0.00399505	0.004	0.00800019	0.0160224
		0.7105		0.0505638	0.0490835	0.031263	0.0422095	0.0517438	0.0571404	0.0434344	0.0205134		0.0179145	0.0678961	0.0241189	0.0318208	0.0462912	0.0518663	0.036143	0.0865283		0.0120012	0.004	0.00400003	0.00799947	0.00399498	0.004	0.00800019	0.0160241
		0.711		0.0505034	0.0489932	0.0311679	0.0421127	0.051675	0.0570639	0.0433728	0.0203839		0.0178425	0.0678751	0.024079	0.0318036	0.0461754	0.0517886	0.0360172	0.0864713		0.0119921	0.004	0.00400004	0.00799943	0.00399491	0.004	0.00800019	0.0160257
		0.7115		0.0504433	0.0489022	0.0310721	0.0420135	0.0516057	0.0569878	0.0433104	0.0202539		0.0177693	0.0678531	0.0240391	0.0317858	0.0460597	0.0517115	0.0358924	0.0864148		0.0119826	0.004	0.00400004	0.00799938	0.00399484	0.004	0.00800019	0.0160274
		0.712		0.0503834	0.0488105	0.0309757	0.0419116	0.051536	0.056912	0.043247	0.0201234		0.0176951	0.0678302	0.0239993	0.0317674	0.0459442	0.0516351	0.0357684	0.0863588		0.0119727	0.004	0.00400004	0.00799934	0.00399478	0.004	0.00800019	0.0160292
		0.7125		0.0503237	0.0487182	0.0308786	0.041807	0.0514659	0.0568366	0.0431828	0.0199925		0.0176198	0.0678064	0.0239594	0.0317484	0.0458289	0.0515593	0.0356455	0.0863033		0.0119624	0.00400001	0.00400004	0.00799929	0.00399472	0.004	0.00800019	0.016031
		0.713		0.0502643	0.0486254	0.0307808	0.0416998	0.0513953	0.0567616	0.0431176	0.0198611		0.0175435	0.0677815	0.0239195	0.0317288	0.0457138	0.0514843	0.0355235	0.0862485		0.0119516	0.00400001	0.00400005	0.00799924	0.00399466	0.004	0.00800019	0.0160329
		0.7135		0.0502052	0.0485319	0.0306825	0.0415899	0.0513242	0.056687	0.0430515	0.0197294		0.0174662	0.0677555	0.0238796	0.0317086	0.0455991	0.0514099	0.0354025	0.0861943		0.0119404	0.00400001	0.00400005	0.00799919	0.0039946	0.004	0.00800019	0.0160348
		0.714		0.0501463	0.0484379	0.0305835	0.0414772	0.0512526	0.0566128	0.0429845	0.0195972		0.0173879	0.0677285	0.0238397	0.0316878	0.0454847	0.0513362	0.0352825	0.0861407		0.0119287	0.00400001	0.00400005	0.00799914	0.00399455	0.004	0.00800019	0.0160367
		0.7145		0.0500877	0.0483433	0.030484	0.0413618	0.0511806	0.0565389	0.0429166	0.0194646		0.0173088	0.0677004	0.0237997	0.0316663	0.0453708	0.0512633	0.0351636	0.0860879		0.0119166	0.00400001	0.00400005	0.00799908	0.0039945	0.004	0.00800019	0.0160387
		0.715		0.0500295	0.0482483	0.0303839	0.0412435	0.051108	0.0564655	0.0428477	0.0193316		0.0172287	0.0676712	0.0237596	0.0316442	0.0452574	0.051191	0.0350457	0.0860357		0.011904	0.00400001	0.00400006	0.00799903	0.00399445	0.004	0.00800019	0.0160408
		0.7155		0.0499715	0.0481528	0.0302832	0.0411225	0.0510349	0.0563924	0.0427778	0.0191983		0.0171479	0.0676409	0.0237195	0.0316214	0.0451445	0.0511195	0.0349289	0.0859842		0.011891	0.00400001	0.00400006	0.00799898	0.00399441	0.004	0.0080002	0.0160429
		0.716		0.0499139	0.0480569	0.0301821	0.0409986	0.0509613	0.0563197	0.0427069	0.0190647		0.0170662	0.0676093	0.0236793	0.031598	0.0450322	0.0510487	0.0348131	0.0859334		0.0118774	0.00400001	0.00400006	0.00799892	0.00399437	0.004	0.0080002	0.0160451
		0.7165		0.0498566	0.0479605	0.0300804	0.0408719	0.0508871	0.0562474	0.0426351	0.0189308		0.0169838	0.0675766	0.0236389	0.031574	0.0449206	0.0509787	0.0346985	0.0858834		0.0118634	0.00400002	0.00400007	0.00799886	0.00399433	0.004	0.0080002	0.0160473
		0.717		0.0497996	0.0478638	0.0299783	0.0407424	0.0508124	0.0561755	0.0425623	0.0187967		0.0169006	0.0675427	0.0235985	0.0315493	0.0448096	0.0509094	0.0345849	0.0858341		0.0118489	0.00400002	0.00400007	0.00799881	0.0039943	0.004	0.0080002	0.0160496
		0.7175		0.049743	0.0477667	0.0298758	0.04061	0.0507371	0.056104	0.0424884	0.0186624		0.0168169	0.0675075	0.0235579	0.0315239	0.0446993	0.050841	0.0344724	0.0857856		0.0118338	0.00400002	0.00400007	0.00799875	0.00399427	0.004	0.0080002	0.0160519
		0.718		0.0496868	0.0476692	0.0297728	0.0404747	0.0506613	0.0560328	0.0424136	0.018528		0.0167325	0.0674711	0.0235172	0.0314978	0.0445899	0.0507733	0.0343609	0.0857379		0.0118183	0.00400002	0.00400007	0.00799869	0.00399425	0.004	0.0080002	0.0160543
		0.7185		0.0496309	0.0475715	0.0296695	0.0403365	0.050585	0.0559621	0.0423378	0.0183936		0.0166476	0.0674334	0.0234764	0.0314711	0.0444812	0.0507064	0.0342506	0.085691		0.0118022	0.00400002	0.00400008	0.00799863	0.00399423	0.004	0.0080002	0.0160568
		0.719		0.0495754	0.0474735	0.0295658	0.0401954	0.0505081	0.0558917	0.0422609	0.0182591		0.0165622	0.0673944	0.0234354	0.0314436	0.0443735	0.0506404	0.0341413	0.0856449		0.0117856	0.00400002	0.00400008	0.00799856	0.00399421	0.004	0.0080002	0.0160593
		0.7195		0.0495202	0.0473752	0.0294619	0.0400515	0.0504306	0.0558218	0.0421831	0.0181246		0.0164764	0.067354	0.0233942	0.0314155	0.0442666	0.0505753	0.034033	0.0855995		0.0117685	0.00400003	0.00400008	0.0079985	0.00399421	0.004	0.0080002	0.0160618
		0.72		0.0494653	0.0472767	0.0293577	0.0399048	0.0503525	0.0557522	0.0421042	0.0179904		0.0163903	0.0673123	0.0233529	0.0313867	0.0441607	0.050511	0.0339258	0.085555		0.0117508	0.00400003	0.00400009	0.00799843	0.0039942	0.004	0.0080002	0.0160644
		0.7205		0.0494108	0.047178	0.0292533	0.0397551	0.050274	0.0556829	0.0420244	0.0178563		0.0163039	0.0672692	0.0233114	0.0313573	0.0440558	0.0504476	0.0338196	0.0855113		0.0117325	0.00400003	0.00400009	0.00799837	0.00399421	0.004	0.00800021	0.0160671
		0.721		0.0493567	0.0470792	0.0291487	0.0396027	0.0501948	0.0556141	0.0419435	0.0177225		0.0162173	0.0672248	0.0232697	0.0313271	0.0439519	0.0503852	0.0337144	0.0854683		0.0117137	0.00400003	0.00400009	0.0079983	0.00399421	0.004	0.00800021	0.0160698
		0.7215		0.0493028	0.0469802	0.029044	0.0394474	0.0501151	0.0555457	0.0418617	0.0175891		0.0161305	0.0671789	0.0232278	0.0312962	0.0438492	0.0503237	0.0336102	0.0854262		0.0116944	0.00400004	0.0040001	0.00799823	0.00399423	0.00400001	0.00800021	0.0160725
		0.722		0.0492493	0.0468811	0.0289392	0.0392893	0.0500349	0.0554776	0.0417789	0.0174561		0.0160436	0.0671316	0.0231857	0.0312647	0.0437475	0.0502632	0.0335069	0.0853849		0.0116744	0.00400004	0.0040001	0.00799816	0.00399425	0.00400001	0.00800021	0.0160754
		0.7225		0.0491961	0.046782	0.0288343	0.0391285	0.0499542	0.0554099	0.0416951	0.0173237		0.0159567	0.0670828	0.0231434	0.0312324	0.0436471	0.0502036	0.0334046	0.0853443		0.0116539	0.00400004	0.0040001	0.00799809	0.00399428	0.00400001	0.00800021	0.0160782
		0.723		0.0491432	0.0466828	0.0287294	0.0389649	0.0498729	0.0553426	0.0416104	0.0171919		0.0158698	0.0670326	0.0231009	0.0311995	0.0435478	0.0501451	0.0333032	0.0853046		0.0116328	0.00400004	0.00400011	0.00799802	0.00399431	0.00400001	0.00800021	0.0160811
		0.7235		0.0490905	0.0465836	0.0286245	0.0387987	0.0497911	0.0552757	0.0415247	0.0170608		0.015783	0.0669809	0.0230581	0.0311658	0.0434498	0.0500876	0.0332028	0.0852656		0.0116111	0.00400004	0.00400011	0.00799795	0.00399436	0.00400001	0.00800021	0.0160841
		0.724		0.0490382	0.0464844	0.0285197	0.0386298	0.0497089	0.0552092	0.0414382	0.0169305		0.0156964	0.0669277	0.0230152	0.0311315	0.0433531	0.0500312	0.0331032	0.0852274		0.0115889	0.00400005	0.00400012	0.00799788	0.00399441	0.00400001	0.00800022	0.0160871
		0.7245		0.0489861	0.0463853	0.028415	0.0384583	0.0496261	0.0551431	0.0413507	0.016801		0.01561	0.066873	0.022972	0.0310965	0.0432578	0.0499758	0.0330044	0.0851899		0.011566	0.00400005	0.00400012	0.0079978	0.00399446	0.00400001	0.00800022	0.0160902
		0.725		0.0489342	0.0462862	0.0283104	0.0382843	0.0495429	0.0550773	0.0412624	0.0166726		0.0155238	0.0668168	0.0229286	0.0310609	0.0431638	0.0499215	0.0329065	0.0851532		0.0115425	0.00400005	0.00400012	0.00799773	0.00399453	0.00400001	0.00800022	0.0160933
		0.7255		0.0488826	0.0461872	0.0282059	0.0381077	0.0494593	0.055012	0.0411732	0.0165452		0.015438	0.066759	0.022885	0.0310245	0.0430712	0.0498682	0.0328093	0.0851173		0.0115184	0.00400005	0.00400013	0.00799765	0.00399461	0.00400001	0.00800022	0.0160965
		0.726		0.0488311	0.0460883	0.0281016	0.0379288	0.0493753	0.0549471	0.0410832	0.016419		0.0153527	0.0666997	0.0228412	0.0309875	0.04298	0.0498161	0.0327129	0.0850821		0.0114937	0.00400006	0.00400013	0.00799757	0.00399469	0.00400002	0.00800022	0.0160997
		0.7265		0.0487799	0.0459896	0.0279976	0.0377474	0.0492909	0.0548826	0.0409924	0.0162939		0.0152678	0.0666389	0.0227972	0.0309498	0.0428902	0.049765	0.0326173	0.0850475		0.0114684	0.00400006	0.00400013	0.0079975	0.00399478	0.00400002	0.00800022	0.0161029
		0.727		0.0487288	0.045891	0.0278938	0.0375638	0.0492061	0.0548185	0.0409009	0.0161701		0.0151834	0.0665765	0.0227529	0.0309115	0.0428019	0.049715	0.0325223	0.0850137		0.0114425	0.00400006	0.00400014	0.00799742	0.00399488	0.00400002	0.00800023	0.0161062
		0.7275		0.0486779	0.0457925	0.0277903	0.037378	0.049121	0.0547549	0.0408087	0.0160477		0.0150996	0.0665125	0.0227085	0.0308725	0.042715	0.0496661	0.032428	0.0849806		0.011416	0.00400007	0.00400014	0.00799734	0.003995	0.00400002	0.00800023	0.0161095
		0.728		0.0486271	0.0456942	0.0276871	0.03719	0.0490356	0.0546917	0.0407158	0.0159267		0.0150165	0.0664469	0.0226638	0.0308329	0.0426297	0.0496183	0.0323344	0.0849481		0.0113889	0.00400007	0.00400014	0.00799726	0.00399512	0.00400002	0.00800023	0.0161129
		0.7285		0.0485764	0.0455961	0.0275843	0.0369999	0.0489498	0.0546289	0.0406222	0.0158071		0.0149341	0.0663798	0.022619	0.0307927	0.0425458	0.0495716	0.0322413	0.0849163		0.0113611	0.00400007	0.00400015	0.00799718	0.00399525	0.00400002	0.00800023	0.0161163
		0.729		0.0485258	0.0454982	0.0274818	0.0368078	0.0488638	0.0545666	0.0405281	0.015689		0.0148524	0.0663111	0.0225739	0.0307518	0.0424634	0.0495259	0.0321488	0.0848851		0.0113328	0.00400007	0.00400015	0.00799709	0.00399539	0.00400003	0.00800023	0.0161198
		0.7295		0.0484752	0.0454004	0.0273798	0.0366138	0.0487775	0.0545048	0.0404335	0.0155725		0.0147715	0.0662408	0.0225287	0.0307104	0.0423825	0.0494814	0.0320569	0.0848545		0.0113038	0.00400008	0.00400016	0.00799701	0.00399555	0.00400003	0.00800023	0.0161233
		0.73		0.0484247	0.0453028	0.0272783	0.036418	0.048691	0.0544435	0.0403384	0.0154576		0.0146915	0.0661689	0.0224833	0.0306684	0.0423031	0.0494379	0.0319654	0.0848245		0.0112742	0.00400008	0.00400016	0.00799693	0.00399572	0.00400003	0.00800024	0.0161268
		0.7305		0.0483742	0.0452055	0.0271772	0.0362204	0.0486042	0.0543827	0.0402428	0.0153443		0.0146123	0.0660954	0.0224378	0.0306258	0.0422252	0.0493955	0.0318744	0.0847951		0.011244	0.00400008	0.00400016	0.00799685	0.00399589	0.00400003	0.00800024	0.0161304
		0.731		0.0483237	0.0451083	0.0270767	0.0360211	0.0485171	0.0543224	0.0401469	0.0152327		0.0145341	0.0660204	0.0223921	0.0305827	0.0421489	0.0493541	0.0317839	0.0847662		0.0112131	0.00400009	0.00400017	0.00799676	0.00399608	0.00400003	0.00800024	0.016134
		0.7315		0.0482731	0.0450113	0.0269767	0.0358203	0.0484299	0.0542625	0.0400506	0.0151228		0.0144568	0.0659438	0.0223463	0.0305391	0.042074	0.0493138	0.0316937	0.0847378		0.0111817	0.00400009	0.00400017	0.00799668	0.00399629	0.00400004	0.00800024	0.0161376
		0.732		0.0482225	0.0449145	0.0268773	0.0356178	0.0483424	0.0542032	0.0399541	0.0150147		0.0143805	0.0658657	0.0223003	0.0304949	0.0420006	0.0492746	0.031604	0.08471		0.0111497	0.0040001	0.00400017	0.0079966	0.0039965	0.00400004	0.00800024	0.0161412
		0.7325		0.0481718	0.0448179	0.0267786	0.035414	0.0482548	0.0541444	0.0398574	0.0149083		0.0143052	0.065786	0.0222543	0.0304502	0.0419287	0.0492363	0.0315145	0.0846826		0.0111171	0.0040001	0.00400018	0.00799651	0.00399673	0.00400004	0.00800024	0.0161449
		0.733		0.048121	0.0447214	0.0266805	0.0352087	0.048167	0.0540862	0.0397605	0.0148038		0.014231	0.0657047	0.0222083	0.0304051	0.0418583	0.0491991	0.0314254	0.0846556		0.0110838	0.0040001	0.00400018	0.00799643	0.00399698	0.00400004	0.00800025	0.0161486
		0.7335		0.04807	0.0446252	0.026583	0.0350021	0.048079	0.0540284	0.0396635	0.0147011		0.0141578	0.065622	0.0221621	0.0303596	0.0417893	0.0491628	0.0313365	0.0846291		0.01105	0.00400011	0.00400018	0.00799634	0.00399723	0.00400005	0.00800025	0.0161523
		0.734		0.0480189	0.0445291	0.0264862	0.0347943	0.0479909	0.0539711	0.0395664	0.0146002		0.0140857	0.0655377	0.022116	0.0303136	0.0417218	0.0491276	0.0312479	0.0846029		0.0110157	0.00400011	0.00400019	0.00799626	0.0039975	0.00400005	0.00800025	0.016156
		0.7345		0.0479676	0.0444332	0.0263902	0.0345852	0.0479026	0.0539143	0.0394693	0.0145012		0.0140148	0.0654519	0.0220698	0.0302672	0.0416557	0.0490932	0.0311595	0.0845771		0.0109807	0.00400011	0.00400019	0.00799617	0.00399779	0.00400005	0.00800025	0.0161597
		0.735		0.0479161	0.0443375	0.0262948	0.034375	0.0478142	0.053858	0.0393723	0.0144041		0.013945	0.0653647	0.0220237	0.0302205	0.041591	0.0490598	0.0310713	0.0845517		0.0109452	0.00400012	0.00400019	0.00799609	0.00399809	0.00400005	0.00800025	0.0161634
		0.7355		0.0478644	0.044242	0.0262002	0.0341637	0.0477257	0.0538021	0.0392753	0.0143089		0.0138763	0.065276	0.0219776	0.0301735	0.0415278	0.0490274	0.0309832	0.0845266		0.0109092	0.00400012	0.0040002	0.00799601	0.00399841	0.00400006	0.00800025	0.0161672
		0.736		0.0478123	0.0441466	0.0261063	0.0339513	0.047637	0.0537467	0.0391785	0.0142155		0.0138088	0.0651859	0.0219317	0.0301262	0.0414659	0.0489958	0.0308953	0.0845017		0.0108726	0.00400012	0.0040002	0.00799592	0.00399874	0.00400006	0.00800025	0.0161709
		0.7365		0.04776	0.0440513	0.0260131	0.0337379	0.0475483	0.0536917	0.039082	0.0141241		0.0137425	0.0650945	0.0218858	0.0300786	0.0414053	0.0489651	0.0308074	0.0844771		0.0108355	0.00400013	0.0040002	0.00799584	0.00399909	0.00400006	0.00800025	0.0161747
		0.737		0.0477074	0.0439562	0.0259207	0.0335236	0.0474595	0.0536372	0.0389856	0.0140346		0.0136774	0.0650016	0.0218401	0.0300308	0.0413461	0.0489353	0.0307196	0.0844528		0.0107978	0.00400013	0.00400021	0.00799576	0.00399946	0.00400006	0.00800025	0.0161784
		0.7375		0.0476545	0.0438613	0.0258291	0.0333083	0.0473706	0.053583	0.0388896	0.0139471		0.0136135	0.0649075	0.0217946	0.0299827	0.0412882	0.0489062	0.0306319	0.0844286		0.0107597	0.00400013	0.00400021	0.00799567	0.00399984	0.00400007	0.00800025	0.0161821
		0.738		0.0476011	0.0437665	0.0257382	0.0330922	0.0472816	0.0535292	0.0387939	0.0138614		0.0135508	0.064812	0.0217494	0.0299346	0.0412316	0.048878	0.0305442	0.0844046		0.0107211	0.00400014	0.00400021	0.00799559	0.00400024	0.00400007	0.00800025	0.0161858
		0.7385		0.0475474	0.0436718	0.025648	0.0328753	0.0471925	0.0534758	0.0386986	0.0137777		0.0134894	0.0647153	0.0217044	0.0298863	0.0411762	0.0488506	0.0304564	0.0843807		0.010682	0.00400014	0.00400022	0.00799551	0.00400066	0.00400007	0.00800025	0.0161895
		0.739		0.0474933	0.0435772	0.0255586	0.0326576	0.0471033	0.0534227	0.0386037	0.013696		0.0134292	0.0646174	0.0216596	0.0298379	0.0411221	0.0488239	0.0303687	0.0843569		0.0106425	0.00400014	0.00400022	0.00799543	0.0040011	0.00400008	0.00800025	0.0161932
		0.7395		0.0474388	0.0434827	0.02547	0.0324391	0.0470141	0.0533699	0.0385093	0.0136161		0.0133702	0.0645183	0.0216153	0.0297894	0.0410691	0.0487979	0.0302809	0.0843331		0.0106026	0.00400015	0.00400022	0.00799535	0.00400156	0.00400008	0.00800025	0.0161968
		0.74		0.0473837	0.0433884	0.025382	0.03222	0.0469247	0.0533174	0.0384153	0.0135381		0.0133125	0.064418	0.0215712	0.0297409	0.0410173	0.0487726	0.0301931	0.0843094		0.0105623	0.00400015	0.00400023	0.00799528	0.00400203	0.00400008	0.00800025	0.0162004
		0.7405		0.0473282	0.0432942	0.0252949	0.0320001	0.0468352	0.0532652	0.0383218	0.0134621		0.013256	0.0643166	0.0215276	0.0296924	0.0409667	0.048748	0.0301051	0.0842858		0.0105216	0.00400016	0.00400023	0.0079952	0.00400253	0.00400008	0.00800025	0.016204
		0.741		0.0472722	0.0432	0.0252084	0.0317797	0.0467456	0.0532131	0.0382289	0.013388		0.0132007	0.064214	0.0214843	0.0296438	0.0409171	0.048724	0.0300171	0.084262		0.0104805	0.00400016	0.00400023	0.00799513	0.00400304	0.00400009	0.00800025	0.0162075
		0.7415		0.0472157	0.043106	0.0251227	0.0315586	0.0466558	0.0531613	0.0381365	0.0133157		0.0131467	0.0641104	0.0214415	0.0295953	0.0408686	0.0487006	0.029929	0.0842382		0.0104391	0.00400016	0.00400023	0.00799505	0.00400358	0.00400009	0.00800025	0.016211
		0.742		0.0471586	0.0430121	0.0250377	0.0313371	0.0465659	0.0531096	0.0380448	0.0132454		0.0130939	0.0640058	0.0213991	0.0295468	0.0408211	0.0486778	0.0298408	0.0842143		0.0103974	0.00400017	0.00400024	0.00799498	0.00400413	0.00400009	0.00800024	0.0162144
		0.7425		0.047101	0.0429182	0.0249533	0.031115	0.0464757	0.053058	0.0379536	0.0131769		0.0130424	0.0639001	0.0213572	0.0294983	0.0407747	0.0486556	0.0297524	0.0841903		0.0103554	0.00400017	0.00400024	0.00799491	0.00400471	0.0040001	0.00800024	0.0162177
		0.743		0.0470428	0.0428244	0.0248697	0.0308924	0.0463853	0.0530066	0.037863	0.0131102		0.0129921	0.0637935	0.0213158	0.02945	0.0407292	0.0486338	0.0296639	0.0841661		0.0103131	0.00400017	0.00400024	0.00799485	0.00400531	0.0040001	0.00800024	0.016221
		0.7435		0.0469839	0.0427308	0.0247867	0.0306694	0.0462946	0.0529552	0.0377731	0.0130455		0.012943	0.0636859	0.0212749	0.0294017	0.0406846	0.0486125	0.0295753	0.0841417		0.0102707	0.00400018	0.00400024	0.00799478	0.00400593	0.0040001	0.00800024	0.0162242
		0.744		0.0469245	0.0426372	0.0247044	0.030446	0.0462037	0.0529038	0.0376839	0.0129825		0.0128951	0.0635773	0.0212346	0.0293535	0.0406409	0.0485916	0.0294866	0.0841171		0.010228	0.00400018	0.00400024	0.00799472	0.00400657	0.00400011	0.00800023	0.0162274
		0.7445		0.0468644	0.0425437	0.0246228	0.0302223	0.0461124	0.0528524	0.0375953	0.0129213		0.0128485	0.0634679	0.0211948	0.0293054	0.040598	0.0485712	0.0293977	0.0840922		0.0101853	0.00400018	0.00400025	0.00799466	0.00400724	0.00400011	0.00800023	0.0162304
		0.745		0.0468037	0.0424504	0.0245417	0.0299983	0.0460207	0.0528009	0.0375073	0.012862		0.012803	0.0633576	0.0211555	0.0292574	0.040556	0.0485511	0.0293087	0.084067		0.0101424	0.00400019	0.00400025	0.0079946	0.00400793	0.00400011	0.00800023	0.0162334
		0.7455		0.0467423	0.0423571	0.0244613	0.029774	0.0459287	0.0527494	0.0374201	0.0128044		0.0127588	0.0632464	0.0211168	0.0292095	0.0405147	0.0485314	0.0292195	0.0840415		0.0100994	0.00400019	0.00400025	0.00799455	0.00400864	0.00400012	0.00800022	0.0162362
		0.746		0.0466802	0.042264	0.0243814	0.0295495	0.0458362	0.0526977	0.0373336	0.0127485		0.0127157	0.0631345	0.0210787	0.0291617	0.0404741	0.0485119	0.0291303	0.0840155		0.0100564	0.00400019	0.00400025	0.0079945	0.00400937	0.00400012	0.00800022	0.016239
		0.7465		0.0466175	0.0421709	0.0243022	0.0293249	0.0457432	0.0526459	0.0372477	0.0126944		0.0126739	0.0630217	0.0210412	0.0291141	0.0404343	0.0484927	0.0290409	0.0839892		0.0100134	0.0040002	0.00400025	0.00799445	0.00401013	0.00400012	0.00800021	0.0162416
		0.747		0.046554	0.042078	0.0242234	0.0291002	0.0456497	0.0525938	0.0371626	0.0126421		0.0126332	0.0629082	0.0210043	0.0290666	0.040395	0.0484738	0.0289514	0.0839625		0.0099704	0.0040002	0.00400025	0.0079944	0.00401092	0.00400013	0.00800021	0.0162441
		0.7475		0.0464898	0.0419853	0.0241453	0.0288754	0.0455557	0.0525415	0.0370782	0.0125914		0.0125936	0.0627941	0.020968	0.0290193	0.0403564	0.048455	0.0288619	0.0839352		0.00992751	0.0040002	0.00400025	0.00799436	0.00401172	0.00400013	0.0080002	0.0162465
		0.748		0.0464249	0.0418926	0.0240676	0.0286507	0.045461	0.0524889	0.0369945	0.0125423		0.0125552	0.0626792	0.0209324	0.0289721	0.0403184	0.0484364	0.0287723	0.0839075		0.00988472	0.00400021	0.00400025	0.00799433	0.00401256	0.00400014	0.00800019	0.0162487
		0.7485		0.0463593	0.0418001	0.0239905	0.028426	0.0453656	0.0524359	0.0369115	0.012495		0.0125179	0.0625637	0.0208974	0.028925	0.0402808	0.0484178	0.0286827	0.0838792		0.00984206	0.00400021	0.00400025	0.0079943	0.00401341	0.00400014	0.00800019	0.0162508
		0.749		0.046293	0.0417077	0.0239138	0.0282015	0.0452695	0.0523826	0.0368292	0.0124492		0.0124818	0.0624476	0.020863	0.0288781	0.0402438	0.0483994	0.028593	0.0838503		0.00979957	0.00400021	0.00400025	0.00799427	0.0040143	0.00400014	0.00800018	0.0162527
		0.7495		0.0462259	0.0416155	0.0238376	0.0279771	0.0451726	0.0523289	0.0367477	0.0124051		0.0124467	0.0623309	0.0208293	0.0288314	0.0402071	0.048381	0.0285034	0.0838208		0.00975726	0.00400022	0.00400025	0.00799424	0.00401521	0.00400015	0.00800017	0.0162544
		0.75		0.0461582	0.0415234	0.0237619	0.0277531	0.045075	0.0522746	0.0366668	0.0123625		0.0124128	0.0622138	0.0207962	0.0287848	0.0401709	0.0483625	0.0284138	0.0837906		0.00971517	0.00400022	0.00400025	0.00799422	0.00401614	0.00400015	0.00800017	0.016256
		0.7505		0.0460896	0.0414314	0.0236866	0.0275294	0.0449764	0.0522199	0.0365867	0.0123215		0.0123799	0.0620961	0.0207638	0.0287383	0.040135	0.048344	0.0283243	0.0837598		0.00967332	0.00400022	0.00400024	0.00799421	0.0040171	0.00400015	0.00800016	0.0162574
		0.751		0.0460204	0.0413395	0.0236117	0.0273062	0.0448769	0.0521646	0.0365073	0.012282		0.0123481	0.061978	0.020732	0.028692	0.0400994	0.0483255	0.0282349	0.0837282		0.00963172	0.00400022	0.00400024	0.0079942	0.00401809	0.00400016	0.00800015	0.0162586
		0.7515		0.0459504	0.0412477	0.0235371	0.0270834	0.0447764	0.0521087	0.0364286	0.012244		0.0123173	0.0618595	0.0207009	0.0286458	0.0400641	0.0483068	0.0281457	0.0836959		0.00959041	0.00400023	0.00400024	0.0079942	0.0040191	0.00400016	0.00800014	0.0162596
		0.752		0.0458797	0.0411559	0.023463	0.0268612	0.0446749	0.0520522	0.0363506	0.0122075		0.0122875	0.0617406	0.0206704	0.0285997	0.040029	0.0482879	0.0280567	0.0836628		0.00954939	0.00400023	0.00400024	0.0079942	0.00402015	0.00400016	0.00800013	0.0162603
		0.7525		0.0458083	0.0410643	0.0233892	0.0266397	0.0445722	0.051995	0.0362733	0.0121724		0.0122588	0.0616215	0.0206406	0.0285538	0.0399941	0.0482688	0.0279679	0.0836289		0.00950868	0.00400023	0.00400023	0.00799421	0.00402121	0.00400017	0.00800012	0.0162609
		0.753		0.0457362	0.0409727	0.0233158	0.0264189	0.0444684	0.051937	0.0361967	0.0121388		0.0122311	0.0615021	0.0206115	0.0285079	0.0399593	0.0482495	0.0278795	0.0835942		0.0094683	0.00400023	0.00400023	0.00799422	0.00402231	0.00400017	0.00800011	0.0162612
		0.7535		0.0456634	0.0408812	0.0232427	0.0261989	0.0443634	0.0518783	0.0361208	0.0121065		0.0122043	0.0613825	0.0205831	0.0284622	0.0399246	0.0482298	0.0277914	0.0835585		0.00942827	0.00400024	0.00400023	0.00799425	0.00402343	0.00400017	0.00800009	0.0162612
		0.754		0.04559	0.0407897	0.0231699	0.0259797	0.0442571	0.0518187	0.0360456	0.0120756		0.0121785	0.0612628	0.0205553	0.0284167	0.0398899	0.0482098	0.0277038	0.0835219		0.00938858	0.00400024	0.00400022	0.00799427	0.00402458	0.00400018	0.00800008	0.016261
		0.7545		0.0455158	0.0406982	0.0230975	0.0257615	0.0441494	0.0517583	0.0359711	0.0120461		0.0121536	0.0611431	0.0205281	0.0283712	0.0398552	0.0481895	0.0276166	0.0834844		0.00934927	0.00400024	0.00400022	0.00799431	0.00402576	0.00400018	0.00800007	0.0162605
		0.755		0.0454411	0.0406067	0.0230253	0.0255444	0.0440404	0.0516969	0.0358973	0.0120179		0.0121297	0.0610233	0.0205016	0.0283258	0.0398205	0.0481687	0.0275299	0.0834459		0.00931033	0.00400024	0.00400021	0.00799435	0.00402696	0.00400018	0.00800005	0.0162597
		0.7555		0.0453657	0.0405152	0.0229533	0.0253284	0.0439299	0.0516346	0.0358241	0.011991		0.0121067	0.0609035	0.0204758	0.0282805	0.0397857	0.0481474	0.0274437	0.0834064		0.00927177	0.00400024	0.00400021	0.0079944	0.00402819	0.00400018	0.00800004	0.0162587
		0.756		0.0452898	0.0404237	0.0228817	0.0251136	0.0438179	0.0515713	0.0357517	0.0119654		0.0120846	0.0607839	0.0204506	0.0282353	0.0397508	0.0481256	0.0273582	0.0833659		0.0092336	0.00400024	0.0040002	0.00799446	0.00402945	0.00400019	0.00800002	0.0162573
		0.7565		0.0452132	0.0403321	0.0228103	0.0249001	0.0437042	0.051507	0.0356799	0.011941		0.0120633	0.0606644	0.0204261	0.0281901	0.0397157	0.0481033	0.0272733	0.0833243		0.00919583	0.00400024	0.00400019	0.00799453	0.00403074	0.00400019	0.008	0.0162556
		0.757		0.0451361	0.0402404	0.0227391	0.0246879	0.043589	0.0514415	0.0356087	0.0119178		0.012043	0.0605451	0.0204023	0.028145	0.0396803	0.0480804	0.0271892	0.0832816		0.00915845	0.00400024	0.00400019	0.0079946	0.00403205	0.00400019	0.00799999	0.0162535
		0.7575		0.0450585	0.0401487	0.0226682	0.0244773	0.0434721	0.051375	0.0355382	0.0118958		0.0120234	0.0604261	0.020379	0.0281	0.0396447	0.0480568	0.0271058	0.0832377		0.00912148	0.00400025	0.00400018	0.00799468	0.0040334	0.0040002	0.00799997	0.0162511
		0.758		0.0449804	0.0400568	0.0225975	0.0242682	0.0433533	0.0513072	0.0354684	0.011875		0.0120047	0.0603075	0.0203564	0.028055	0.0396089	0.0480326	0.0270233	0.0831928		0.00908492	0.00400025	0.00400017	0.00799478	0.00403477	0.0040002	0.00799995	0.0162484
		0.7585		0.0449018	0.0399648	0.022527	0.0240607	0.0432328	0.0512382	0.0353993	0.0118553		0.0119868	0.0601892	0.0203345	0.0280101	0.0395726	0.0480076	0.0269416	0.0831466		0.00904876	0.00400025	0.00400016	0.00799488	0.00403616	0.0040002	0.00799993	0.0162453
		0.759		0.0448227	0.0398727	0.0224567	0.023855	0.0431104	0.051168	0.0353308	0.0118367		0.0119697	0.0600714	0.0203131	0.0279651	0.039536	0.0479818	0.0268608	0.0830992		0.00901301	0.00400025	0.00400016	0.00799499	0.00403758	0.00400021	0.00799991	0.0162418
		0.7595		0.0447431	0.0397803	0.0223867	0.0236511	0.0429861	0.0510965	0.0352629	0.0118192		0.0119533	0.059954	0.0202924	0.0279202	0.039499	0.0479553	0.0267809	0.0830506		0.00897766	0.00400024	0.00400015	0.00799511	0.00403903	0.00400021	0.00799989	0.0162378
		0.76		0.0446631	0.0396878	0.0223168	0.0234491	0.0428598	0.0510236	0.0351957	0.0118028		0.0119377	0.0598372	0.0202723	0.0278753	0.0394614	0.0479278	0.0267021	0.0830008		0.00894272	0.00400024	0.00400014	0.00799525	0.00404051	0.00400021	0.00799987	0.0162335
		0.7605		0.0445827	0.0395951	0.0222472	0.0232491	0.0427314	0.0509494	0.0351292	0.0117873		0.0119228	0.0597209	0.0202528	0.0278305	0.0394234	0.0478995	0.0266243	0.0829496		0.00890818	0.00400024	0.00400013	0.00799539	0.00404201	0.00400021	0.00799985	0.0162287
		0.761		0.0445019	0.0395022	0.0221778	0.023051	0.0426009	0.0508738	0.0350633	0.0117729		0.0119087	0.0596052	0.0202339	0.0277856	0.0393849	0.0478702	0.0265475	0.0828972		0.00887404	0.00400024	0.00400011	0.00799555	0.00404354	0.00400021	0.00799982	0.0162235
		0.7615		0.0444207	0.039409	0.0221086	0.0228551	0.0424683	0.0507967	0.034998	0.0117595		0.0118952	0.0594902	0.0202157	0.0277407	0.0393457	0.04784	0.0264718	0.0828434		0.00884028	0.00400024	0.0040001	0.00799571	0.00404509	0.00400022	0.0079998	0.0162179
		0.762		0.044339	0.0393155	0.0220396	0.0226614	0.0423335	0.0507181	0.0349334	0.0117471		0.0118825	0.0593757	0.020198	0.0276957	0.0393059	0.0478086	0.0263973	0.0827883		0.00880692	0.00400024	0.00400009	0.00799589	0.00404667	0.00400022	0.00799977	0.0162117
		0.7625		0.044257	0.0392217	0.0219709	0.0224699	0.0421964	0.050638	0.0348695	0.0117355		0.0118704	0.059262	0.0201808	0.0276508	0.0392655	0.0477763	0.0263239	0.0827318		0.00877393	0.00400023	0.00400008	0.00799608	0.00404828	0.00400022	0.00799975	0.016205
		0.763		0.0441747	0.0391277	0.0219024	0.0222807	0.0420571	0.0505564	0.0348062	0.0117249		0.0118589	0.0591489	0.0201643	0.0276058	0.0392244	0.0477428	0.0262516	0.082674		0.00874132	0.00400023	0.00400006	0.00799629	0.0040499	0.00400022	0.00799972	0.0161979
		0.7635		0.0440919	0.0390333	0.0218341	0.0220938	0.0419153	0.0504731	0.0347436	0.0117152		0.0118481	0.0590365	0.0201483	0.0275607	0.0391825	0.0477081	0.0261805	0.0826147		0.00870907	0.00400023	0.00400005	0.0079965	0.00405156	0.00400022	0.00799969	0.0161902
		0.764		0.0440089	0.0389386	0.0217661	0.0219093	0.0417712	0.0503883	0.0346817	0.0117063		0.0118379	0.0589248	0.0201329	0.0275156	0.0391398	0.0476722	0.0261107	0.0825541		0.00867718	0.00400022	0.00400003	0.00799673	0.00405323	0.00400023	0.00799966	0.016182
		0.7645		0.0439255	0.0388436	0.0216984	0.0217273	0.0416247	0.0503018	0.0346205	0.0116982		0.0118283	0.0588138	0.020118	0.0274705	0.0390964	0.0476351	0.026042	0.082492		0.00864563	0.00400022	0.00400002	0.00799697	0.00405493	0.00400023	0.00799963	0.0161732
		0.765		0.0438418	0.0387482	0.021631	0.0215478	0.0414756	0.0502136	0.0345599	0.011691		0.0118192	0.0587036	0.0201037	0.0274252	0.0390521	0.0475967	0.0259746	0.0824284		0.00861443	0.00400022	0.004	0.00799723	0.00405664	0.00400023	0.0079996	0.0161639
		0.7655		0.0437578	0.0386524	0.0215639	0.0213709	0.0413241	0.0501238	0.0345001	0.0116846		0.0118107	0.0585941	0.0200899	0.0273799	0.039007	0.047557	0.0259085	0.0823635		0.00858354	0.00400021	0.00399998	0.0079975	0.00405838	0.00400023	0.00799957	0.0161539
		0.766		0.0436735	0.0385563	0.0214971	0.0211965	0.04117	0.0500322	0.034441	0.0116789		0.0118028	0.0584853	0.0200767	0.0273346	0.0389609	0.0475159	0.0258436	0.082297		0.00855298	0.00400021	0.00399996	0.00799779	0.00406014	0.00400023	0.00799953	0.0161434
		0.7665		0.0435889	0.0384597	0.0214306	0.0210248	0.0410133	0.0499389	0.0343825	0.011674		0.0117954	0.0583772	0.0200639	0.0272891	0.0389139	0.0474734	0.02578	0.0822291		0.00852271	0.0040002	0.00399994	0.00799809	0.00406192	0.00400023	0.0079995	0.0161322
		0.767		0.0435041	0.0383627	0.0213644	0.0208558	0.040854	0.0498438	0.0343249	0.0116698		0.0117885	0.0582699	0.0200517	0.0272436	0.0388659	0.0474294	0.0257176	0.0821597		0.00849274	0.00400019	0.00399992	0.00799841	0.00406372	0.00400023	0.00799946	0.0161204
		0.7675		0.043419	0.0382654	0.0212986	0.0206896	0.0406921	0.049747	0.034268	0.0116663		0.0117821	0.0581633	0.02004	0.027198	0.038817	0.0473839	0.0256566	0.0820888		0.00846304	0.00400019	0.0039999	0.00799874	0.00406553	0.00400023	0.00799943	0.0161079
		0.768		0.0433337	0.0381676	0.0212331	0.0205261	0.0405275	0.0496483	0.0342119	0.0116634		0.0117762	0.0580574	0.0200287	0.0271522	0.038767	0.0473369	0.0255968	0.0820165		0.00843361	0.00400018	0.00399988	0.00799909	0.00406736	0.00400023	0.00799939	0.0160947
		0.7685		0.0432481	0.0380694	0.0211679	0.0203655	0.0403602	0.0495479	0.0341565	0.0116613		0.0117708	0.0579522	0.020018	0.0271064	0.0387159	0.0472884	0.0255383	0.0819426		0.00840443	0.00400017	0.00399986	0.00799946	0.00406921	0.00400023	0.00799935	0.0160809
		0.769		0.0431623	0.0379708	0.0211031	0.0202077	0.0401902	0.0494456	0.034102	0.0116597		0.0117658	0.0578477	0.0200077	0.0270605	0.0386638	0.0472382	0.0254811	0.0818672		0.00837549	0.00400016	0.00399984	0.00799984	0.00407106	0.00400023	0.00799931	0.0160663
		0.7695		0.0430764	0.0378718	0.0210386	0.0200528	0.0400175	0.0493415	0.0340483	0.0116588		0.0117612	0.0577439	0.0199979	0.0270145	0.0386106	0.0471864	0.0254252	0.0817903		0.00834677	0.00400016	0.00399981	0.00800025	0.00407294	0.00400023	0.00799927	0.0160511
		0.77		0.0429902	0.0377723	0.0209745	0.0199008	0.039842	0.0492356	0.0339955	0.0116585		0.0117571	0.0576407	0.0199885	0.0269685	0.0385563	0.0471329	0.0253705	0.0817118		0.00831826	0.00400015	0.00399978	0.00800067	0.00407482	0.00400023	0.00799923	0.016035
		0.7705		0.0429039	0.0376725	0.0209107	0.0197518	0.0396638	0.0491278	0.0339435	0.0116588		0.0117534	0.0575382	0.0199796	0.0269223	0.0385008	0.0470777	0.0253172	0.0816317		0.00828993	0.00400014	0.00399976	0.0080011	0.00407671	0.00400022	0.00799918	0.0160182
		0.771		0.0428174	0.0375722	0.0208473	0.0196057	0.0394829	0.0490182	0.0338924	0.0116596		0.0117501	0.0574363	0.0199712	0.026876	0.0384442	0.0470207	0.0252651	0.08155		0.00826179	0.00400013	0.00399973	0.00800156	0.00407861	0.00400022	0.00799914	0.0160007
		0.7715		0.0427308	0.0374716	0.0207842	0.0194626	0.0392992	0.0489067	0.0338423	0.0116609		0.0117471	0.057335	0.0199631	0.0268297	0.0383863	0.0469619	0.0252143	0.0814667		0.0082338	0.00400012	0.0039997	0.00800204	0.00408052	0.00400022	0.00799909	0.0159823
		0.772		0.0426441	0.0373705	0.0207214	0.0193224	0.0391128	0.0487934	0.033793	0.0116628		0.0117446	0.0572343	0.0199555	0.0267833	0.0383273	0.0469014	0.0251647	0.0813817		0.00820596	0.0040001	0.00399967	0.00800253	0.00408244	0.00400022	0.00799905	0.0159631
		0.7725		0.0425574	0.0372691	0.0206589	0.0191853	0.0389237	0.0486783	0.0337446	0.0116652		0.0117423	0.0571341	0.0199484	0.0267368	0.038267	0.046839	0.0251164	0.0812951		0.00817824	0.00400009	0.00399964	0.00800305	0.00408436	0.00400021	0.007999	0.0159431
		0.773		0.0424705	0.0371674	0.0205968	0.0190511	0.0387319	0.0485614	0.0336971	0.011668		0.0117404	0.0570344	0.0199416	0.0266902	0.0382056	0.0467747	0.0250694	0.0812068		0.00815064	0.00400008	0.00399961	0.00800358	0.00408628	0.00400021	0.00799895	0.0159222
		0.7735		0.0423836	0.0370652	0.020535	0.0189199	0.0385373	0.0484426	0.0336506	0.0116714		0.0117389	0.0569353	0.0199352	0.0266436	0.0381428	0.0467084	0.0250235	0.0811167		0.00812313	0.00400007	0.00399958	0.00800414	0.0040882	0.00400021	0.0079989	0.0159005
		0.774		0.0422967	0.0369628	0.0204735	0.0187918	0.0383402	0.0483221	0.0336049	0.0116751		0.0117376	0.0568366	0.0199292	0.026597	0.0380788	0.0466403	0.0249789	0.0810249		0.0080957	0.00400005	0.00399955	0.00800472	0.00409012	0.0040002	0.00799885	0.0158778
		0.7745		0.0422097	0.0368601	0.0204123	0.0186666	0.0381404	0.0481998	0.0335602	0.0116793		0.0117367	0.0567384	0.0199236	0.0265503	0.0380136	0.0465702	0.0249355	0.0809312		0.00806832	0.00400004	0.00399951	0.00800532	0.00409203	0.0040002	0.00799879	0.0158543
		0.775		0.0421228	0.0367571	0.0203514	0.0185444	0.0379379	0.0480758	0.0335165	0.0116839		0.011736	0.0566406	0.0199184	0.0265036	0.0379471	0.046498	0.0248933	0.0808358		0.00804099	0.00400002	0.00399948	0.00800594	0.00409394	0.00400019	0.00799874	0.0158298
		0.7755		0.0420358	0.0366539	0.0202908	0.0184252	0.037733	0.04795	0.0334736	0.0116889		0.0117357	0.0565432	0.0199135	0.0264569	0.0378793	0.0464239	0.0248523	0.0807385		0.00801369	0.004	0.00399944	0.00800658	0.00409584	0.00400019	0.00799869	0.0158044
		0.776		0.0419488	0.0365505	0.0202304	0.0183089	0.0375255	0.0478226	0.0334317	0.0116943		0.0117355	0.0564462	0.019909	0.0264102	0.0378102	0.0463477	0.0248124	0.0806393		0.0079864	0.00399999	0.0039994	0.00800725	0.00409773	0.00400018	0.00799863	0.0157781
		0.7765		0.0418618	0.0364469	0.0201704	0.0181956	0.0373156	0.0476935	0.0333906	0.0117001		0.0117357	0.0563495	0.0199049	0.0263635	0.0377398	0.0462695	0.0247737	0.0805382		0.00795909	0.00399997	0.00399937	0.00800793	0.00409961	0.00400018	0.00799857	0.0157507
		0.777		0.0417748	0.0363432	0.0201105	0.0180853	0.0371033	0.0475628	0.0333505	0.0117062		0.0117361	0.0562531	0.0199011	0.0263169	0.0376682	0.0461892	0.0247361	0.0804351		0.00793176	0.00399995	0.00399932	0.00800865	0.00410147	0.00400017	0.00799851	0.0157224
[truncated: 444 more rows]

## Sheet: Figure_3C
		Invariance
		beat frequency	single unit firing rate		correlation		Behavior
			mean	SE	mean	SE	population average
		1	0.261135	0.00231067	0.689222	0.00668025	0.696907
[truncated: 7 more rows]

## Sheet: Figure_3D
		Detectability					Chirp Rate
[truncated: 10 more rows]
